# Supplementary material for: Laboratory mouse housing conditions can be improved using common environmental enrichment without compromising data
Source: PubMed Central journal article supplement (PMC5922977; doi:10.1371/journal.pbio.2005019), 2018-04-16

**B6 female**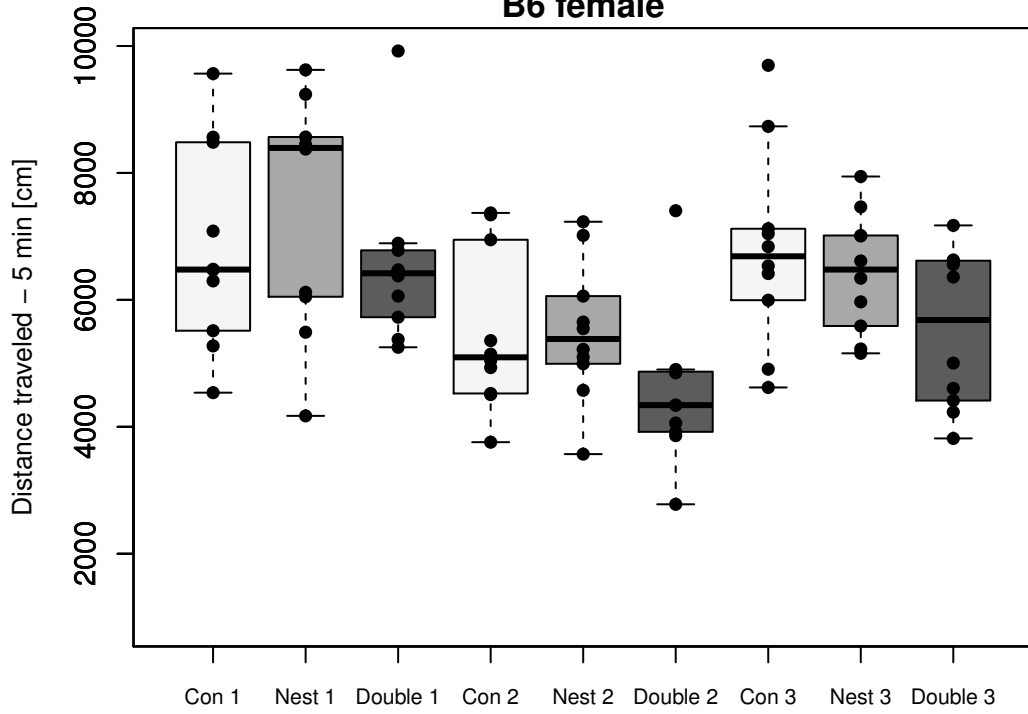**D2 female**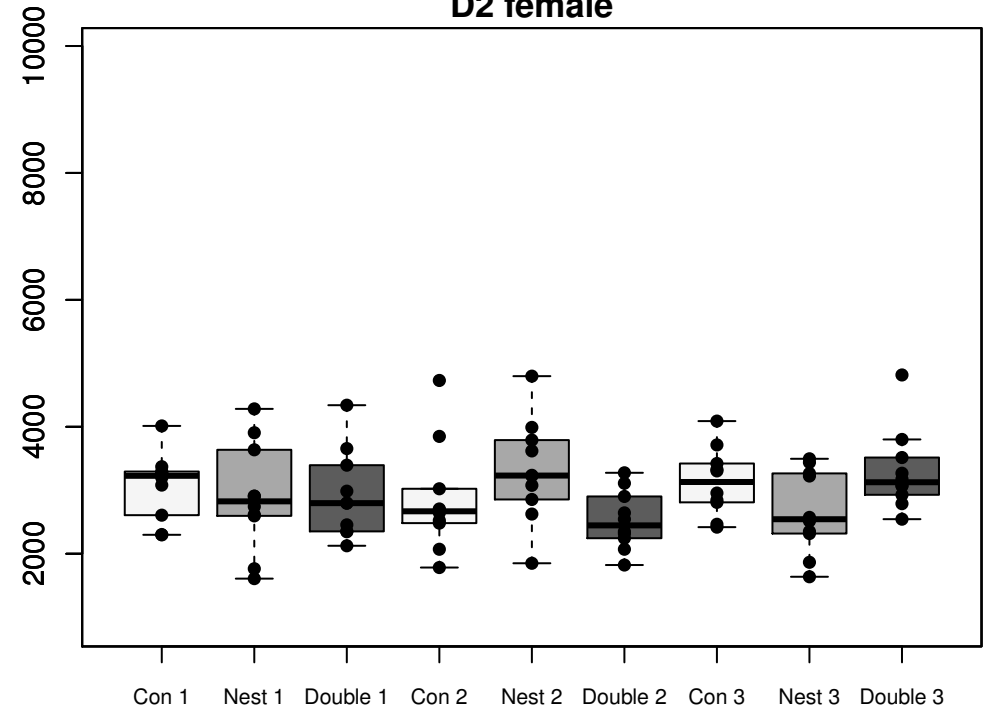**B6 male**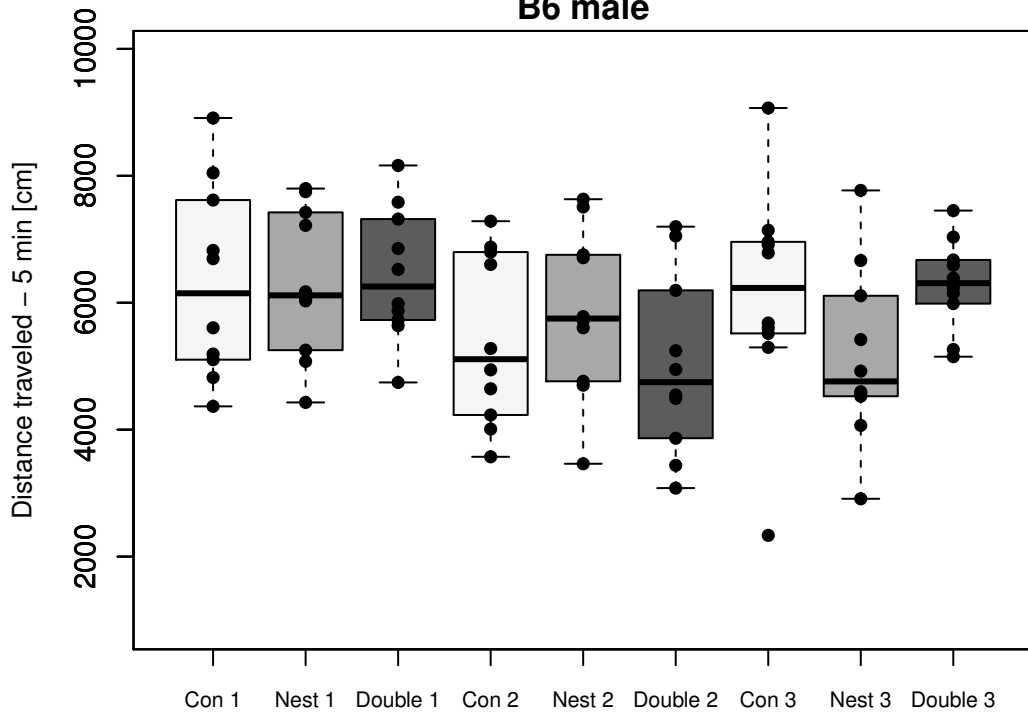**D2 male**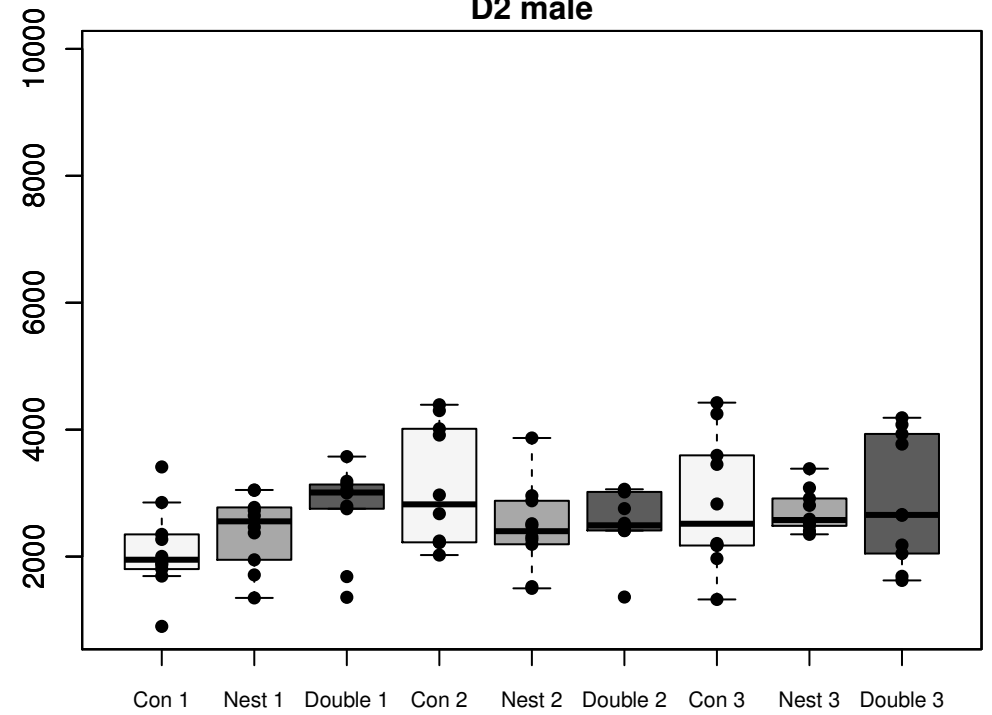

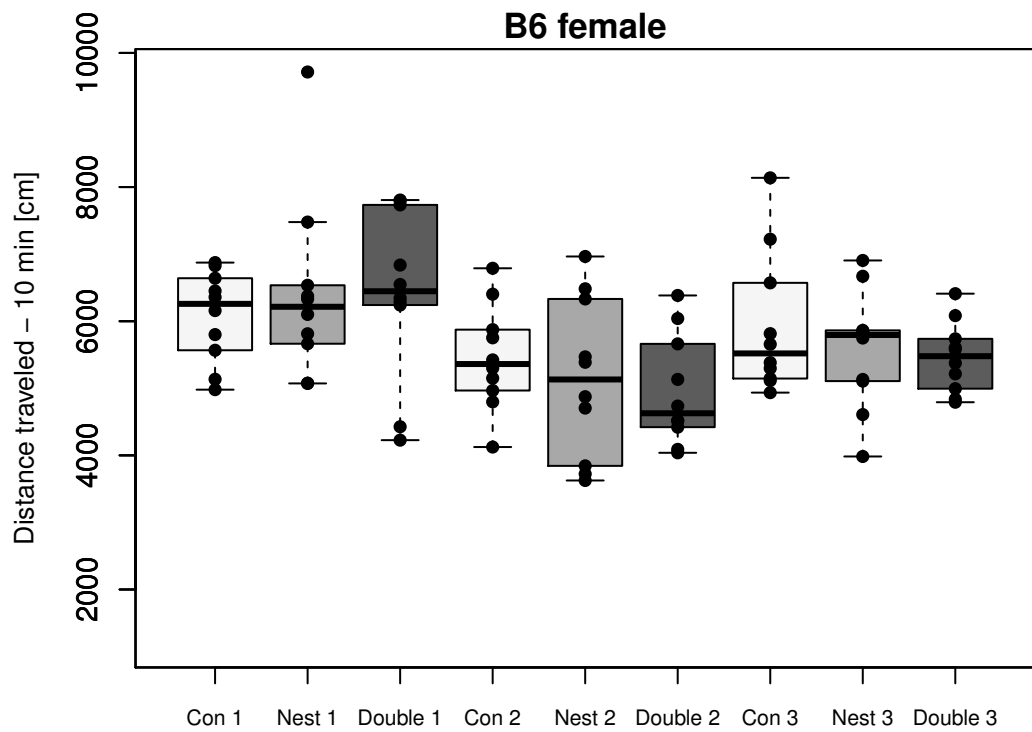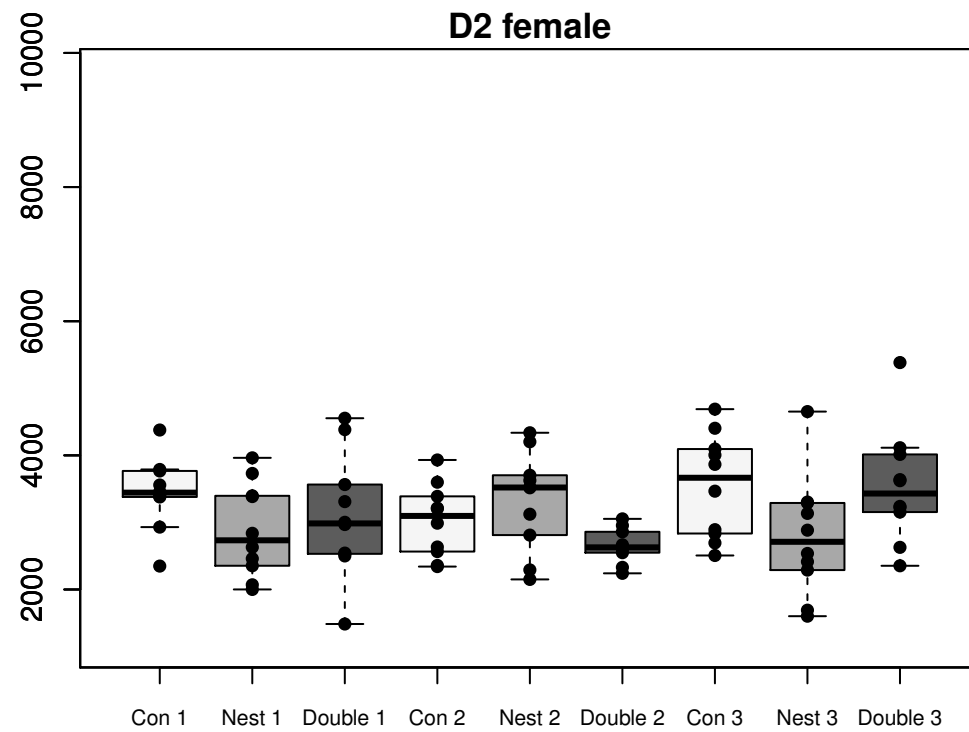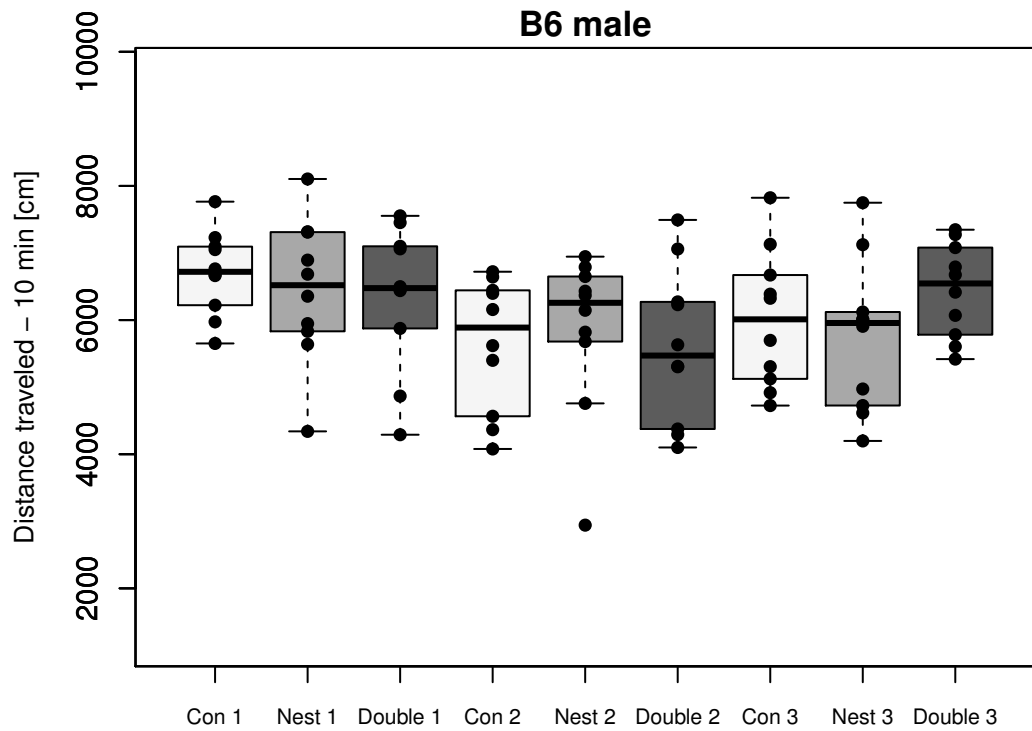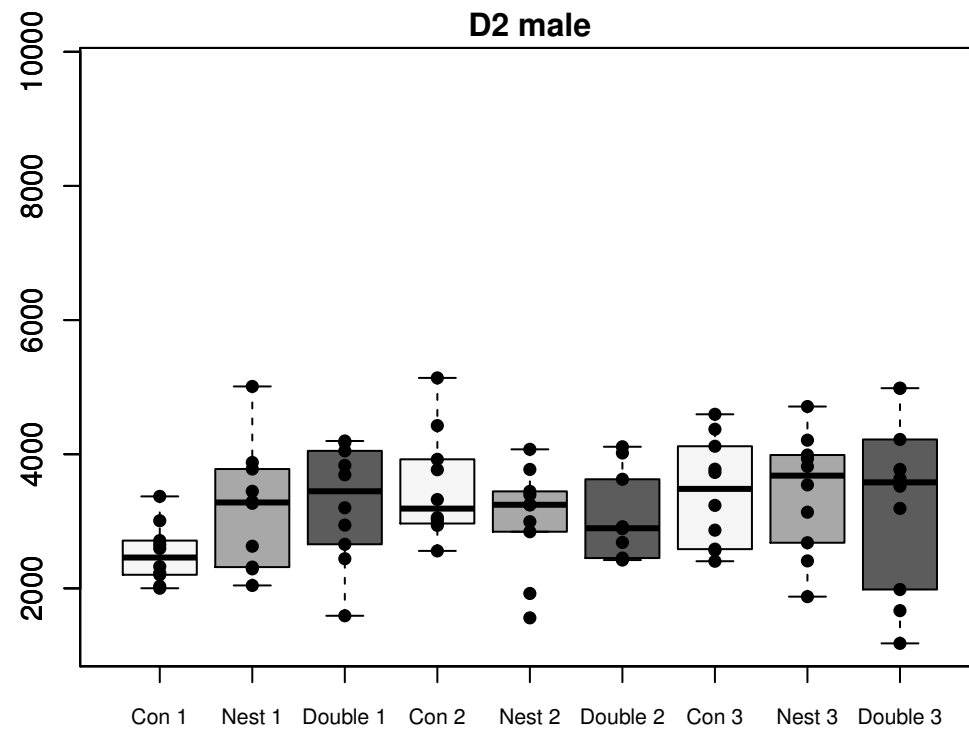

**B6 female**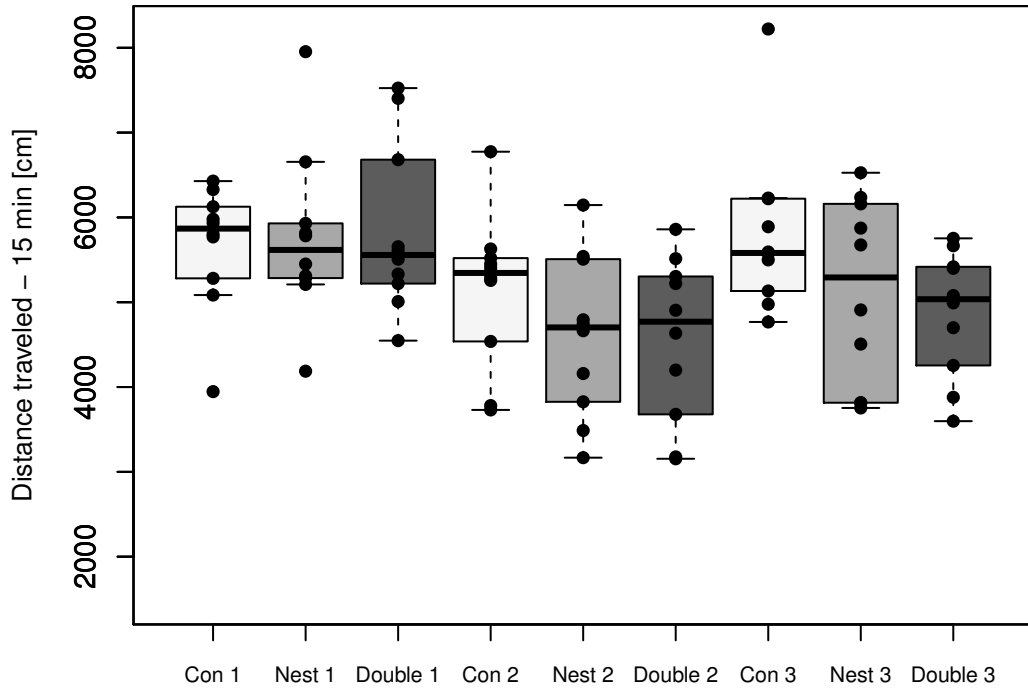**D2 female**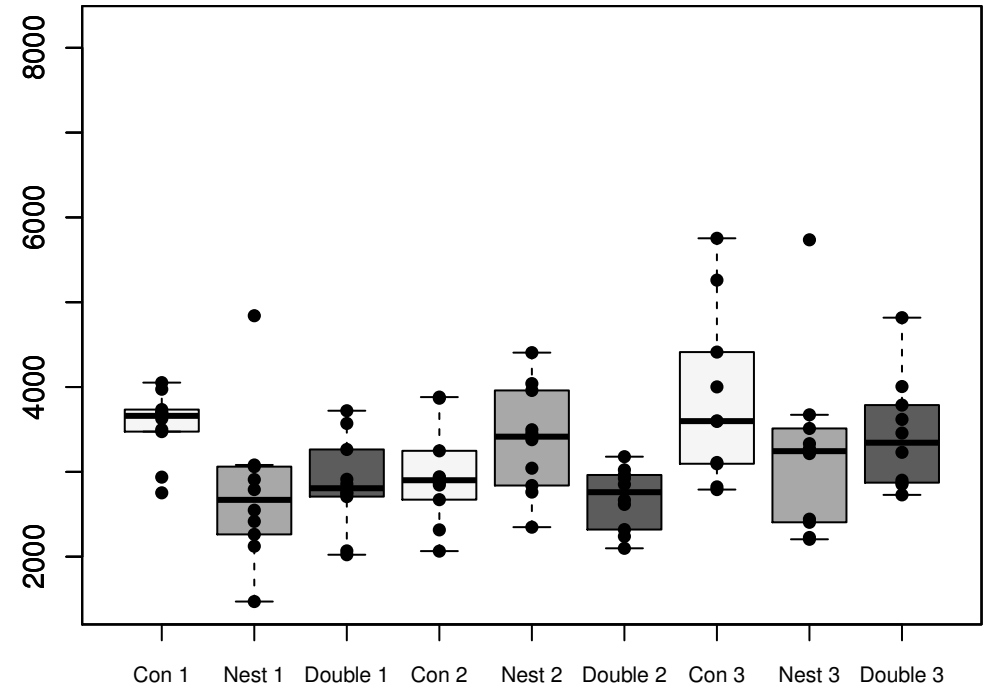**B6 male**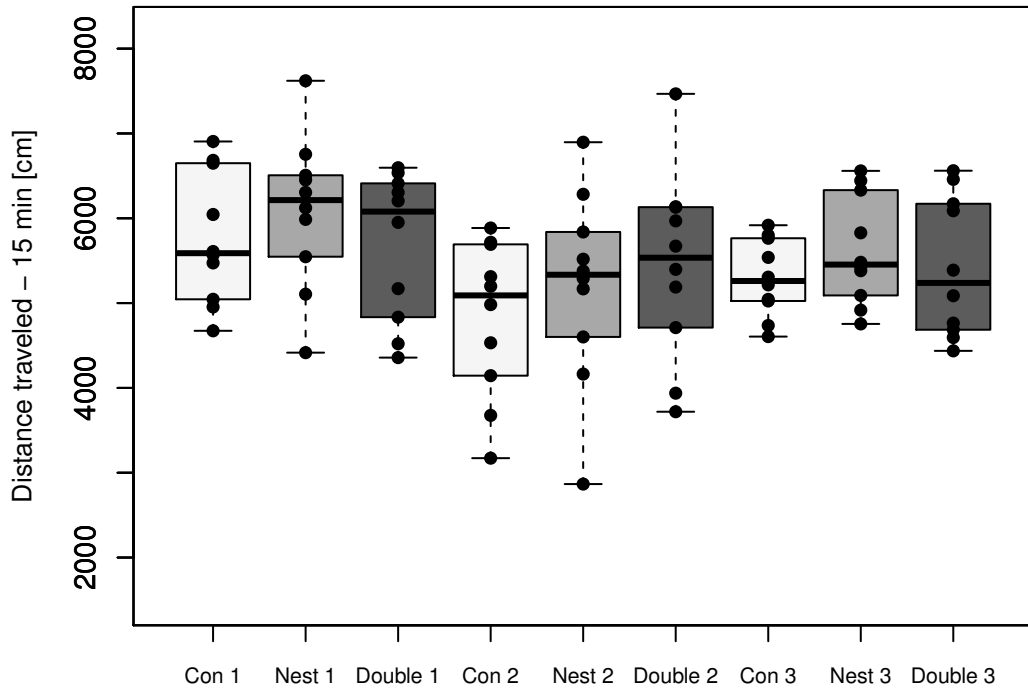**D2 male**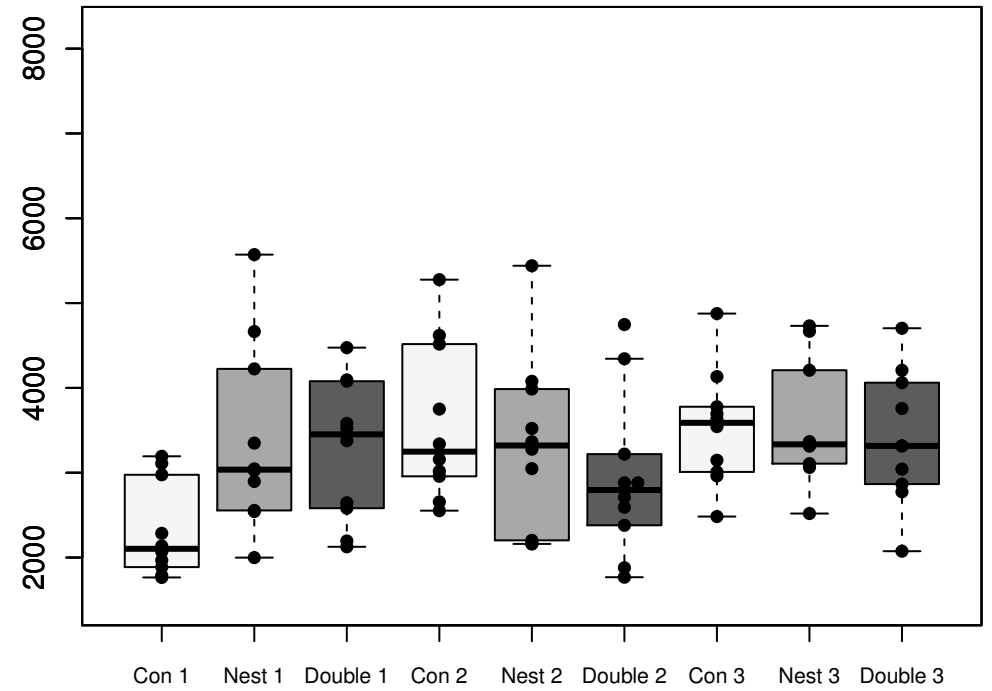

**B6 female**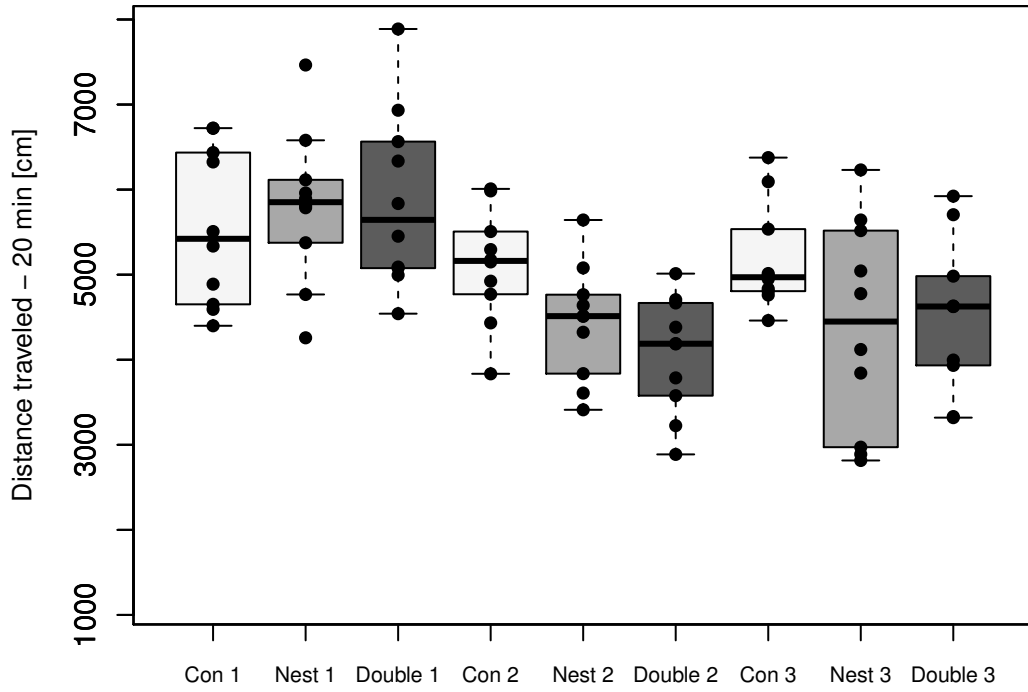**D2 female**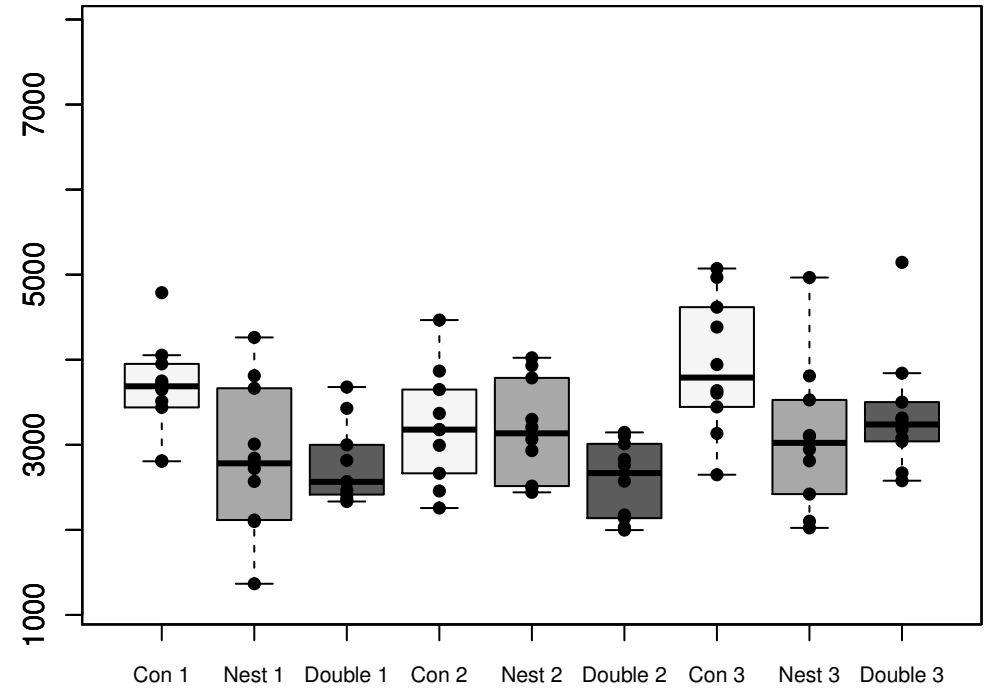**B6 male**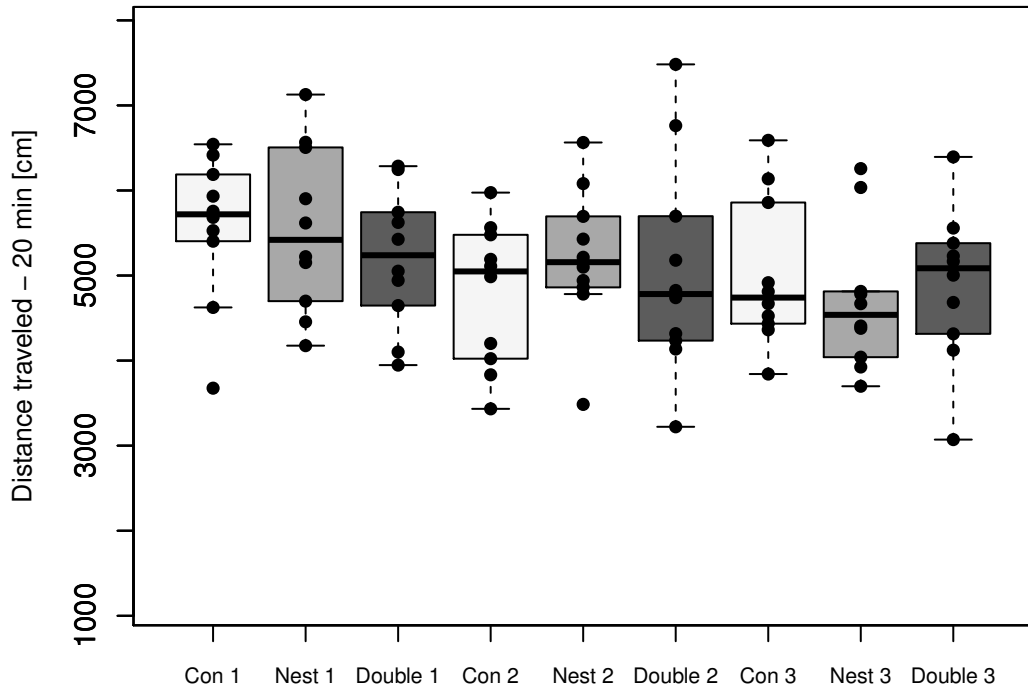**D2 male**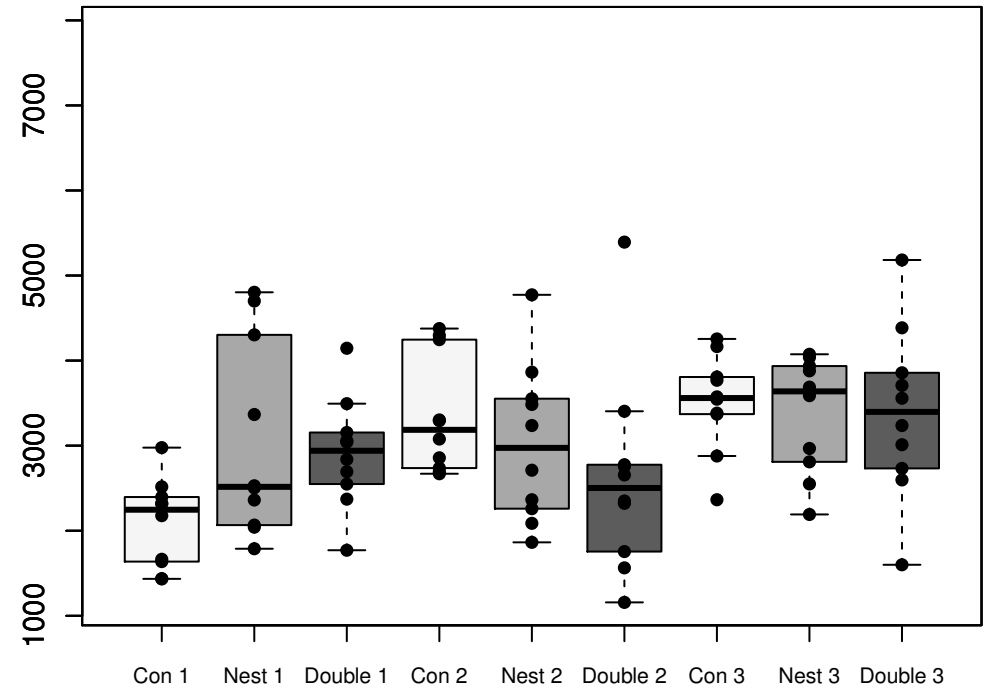

**B6 female**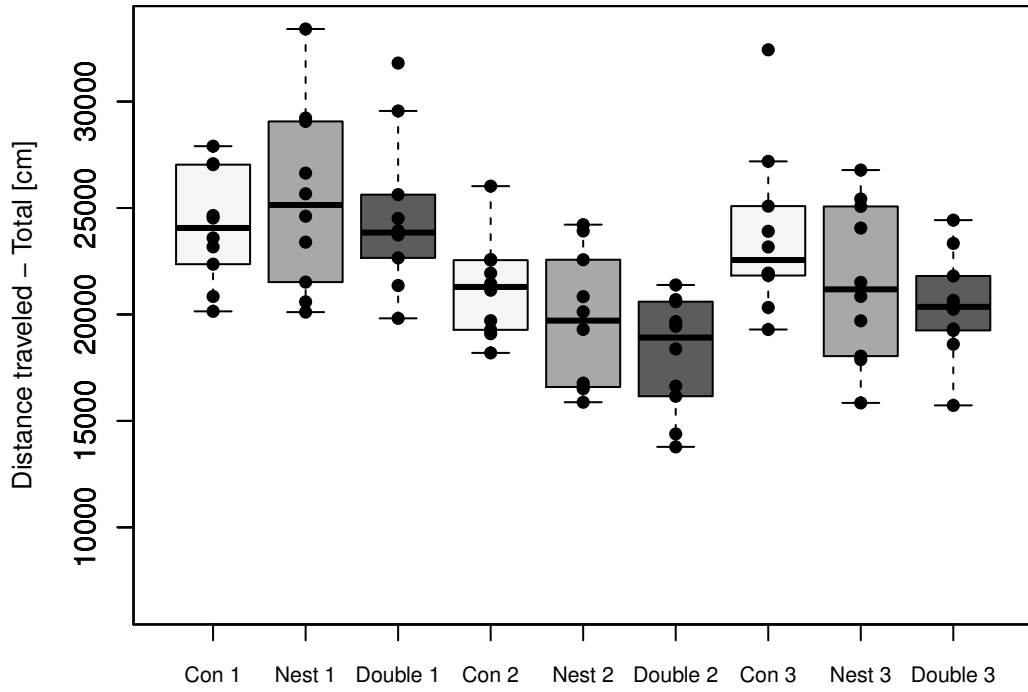**D2 female**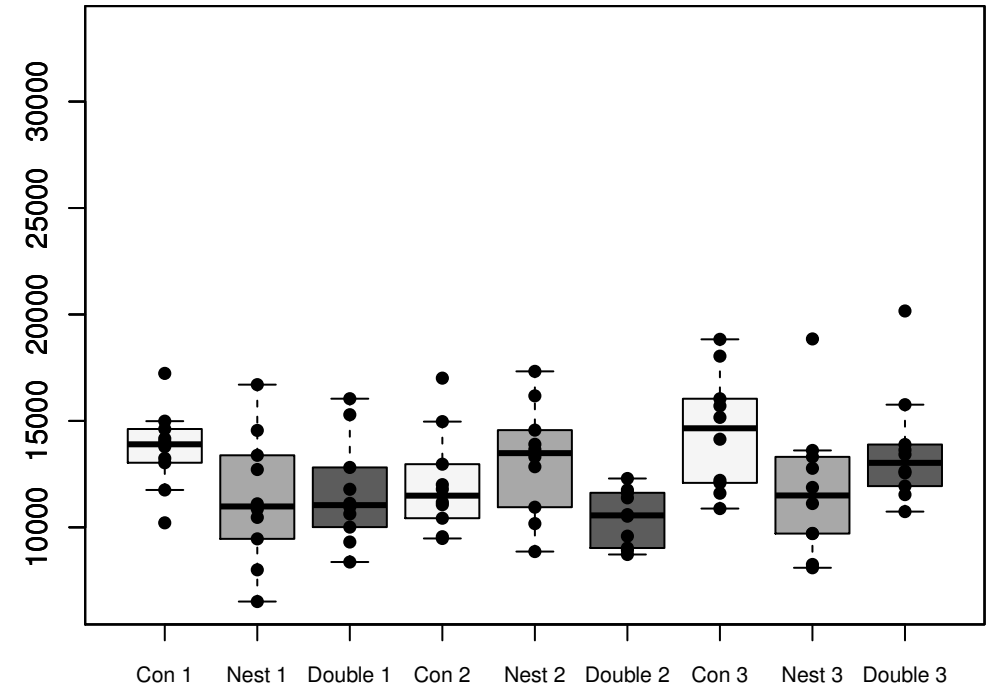**B6 male**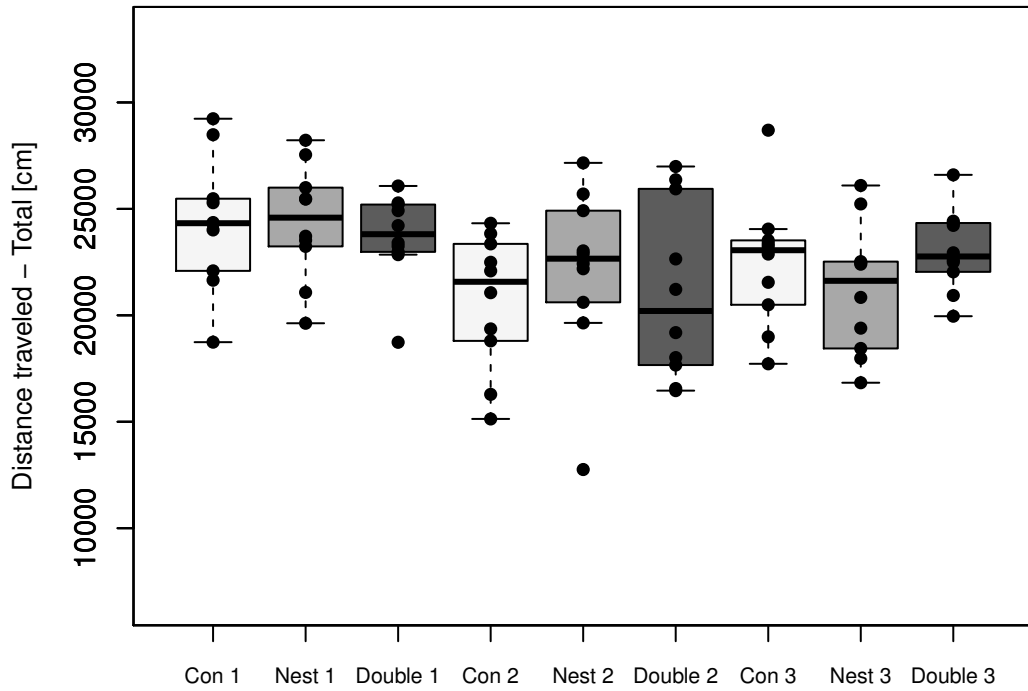**D2 male**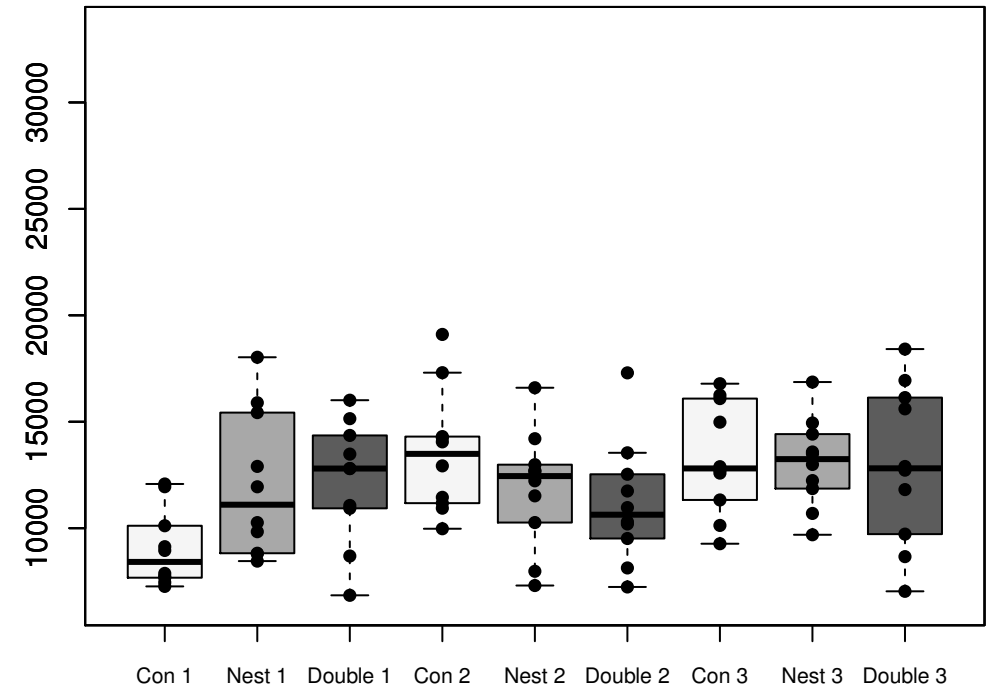

**B6 female**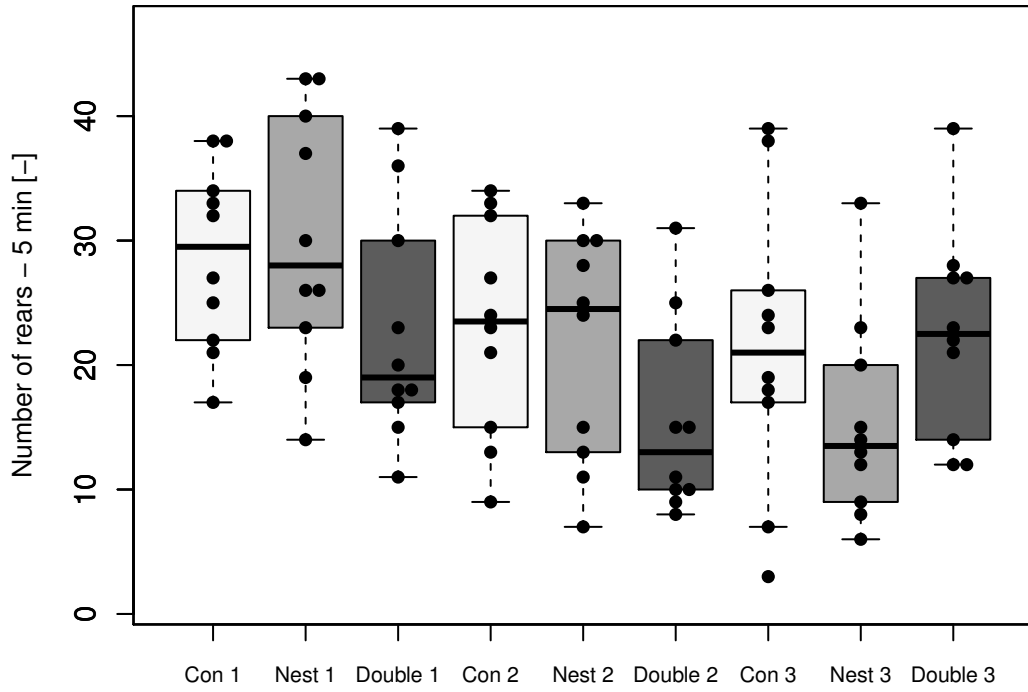**D2 female**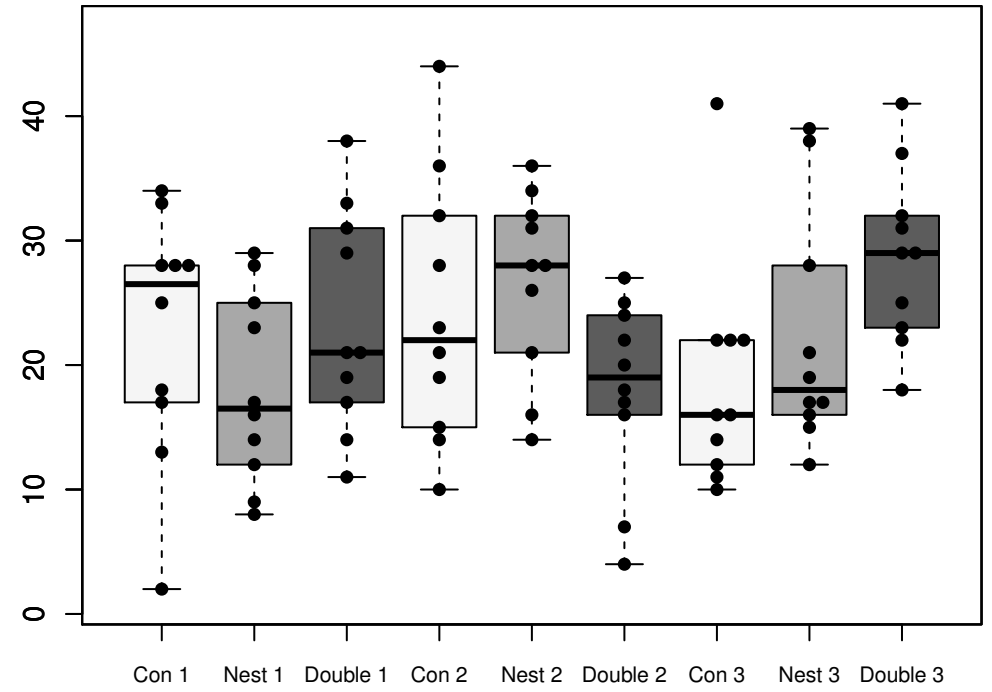**B6 male**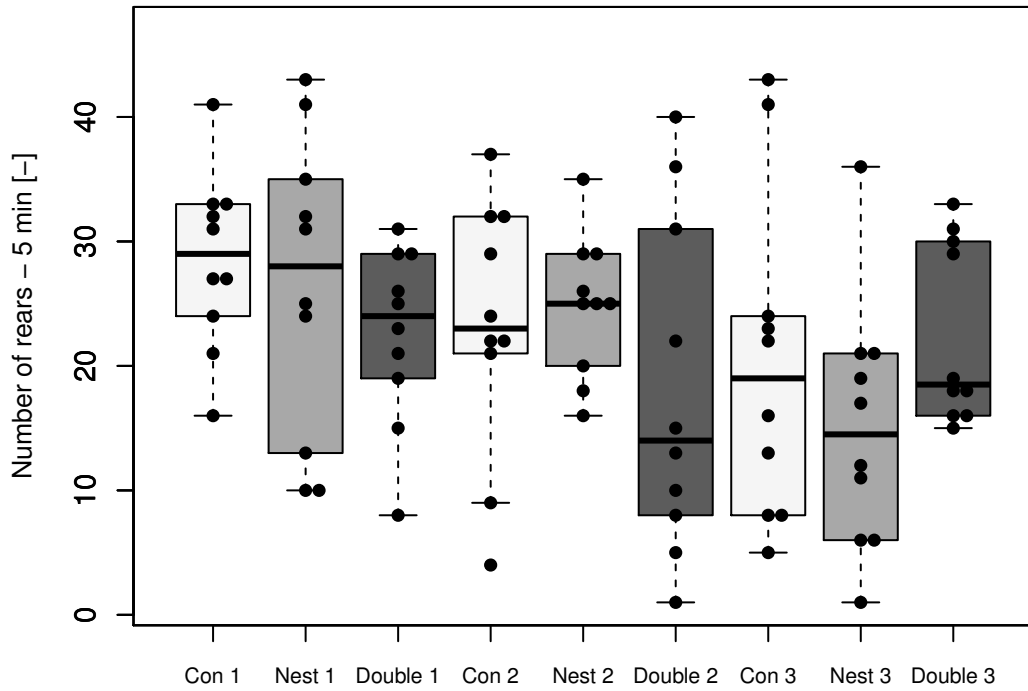**D2 male**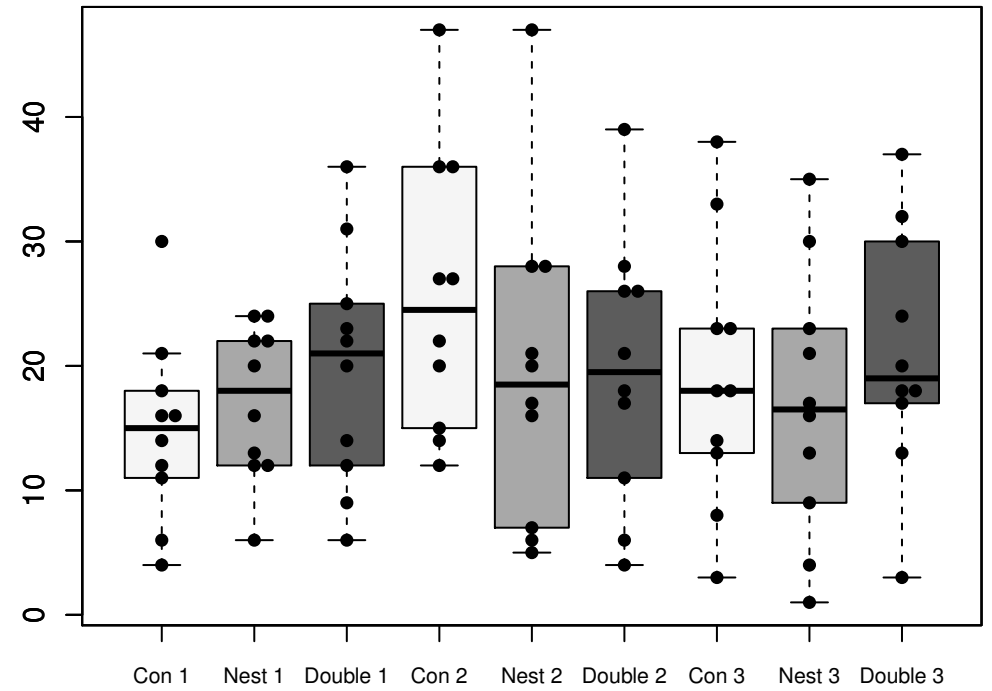

**B6 female**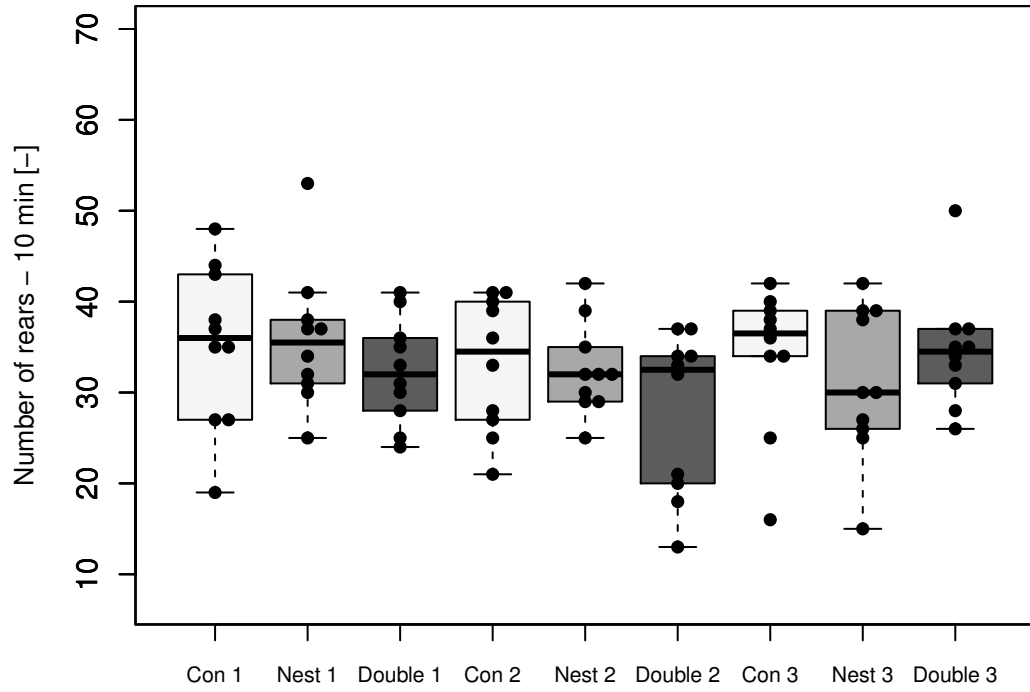**D2 female**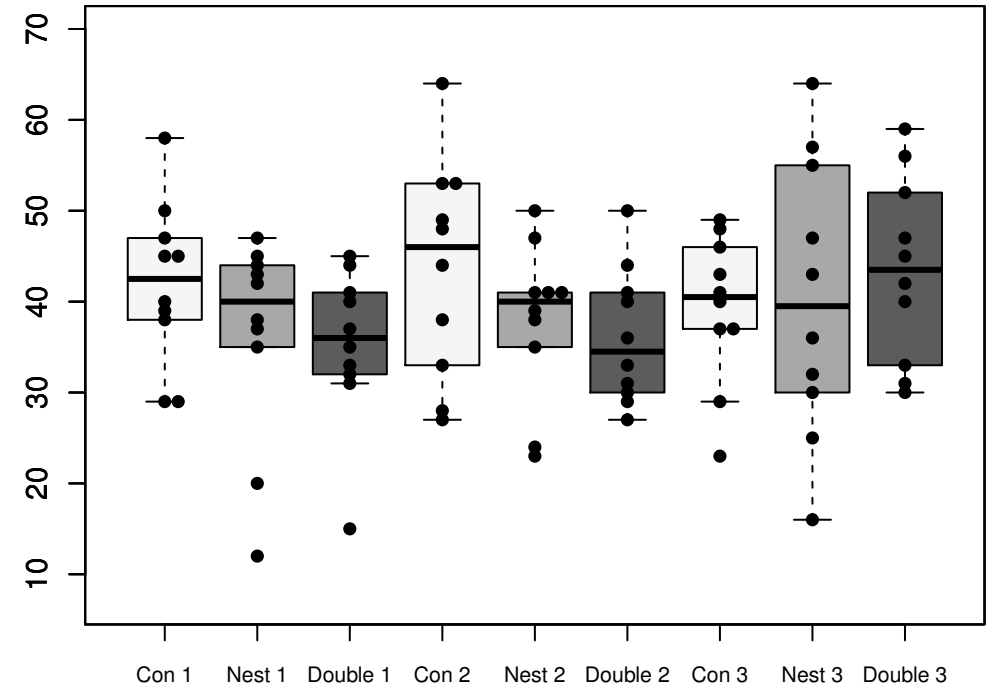**B6 male**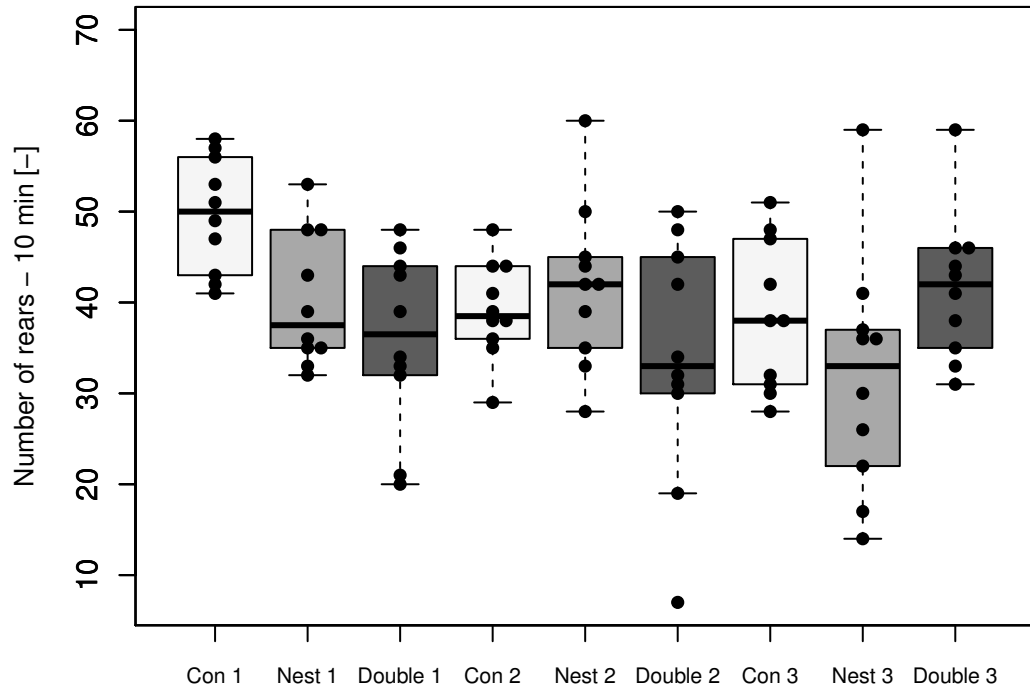**D2 male**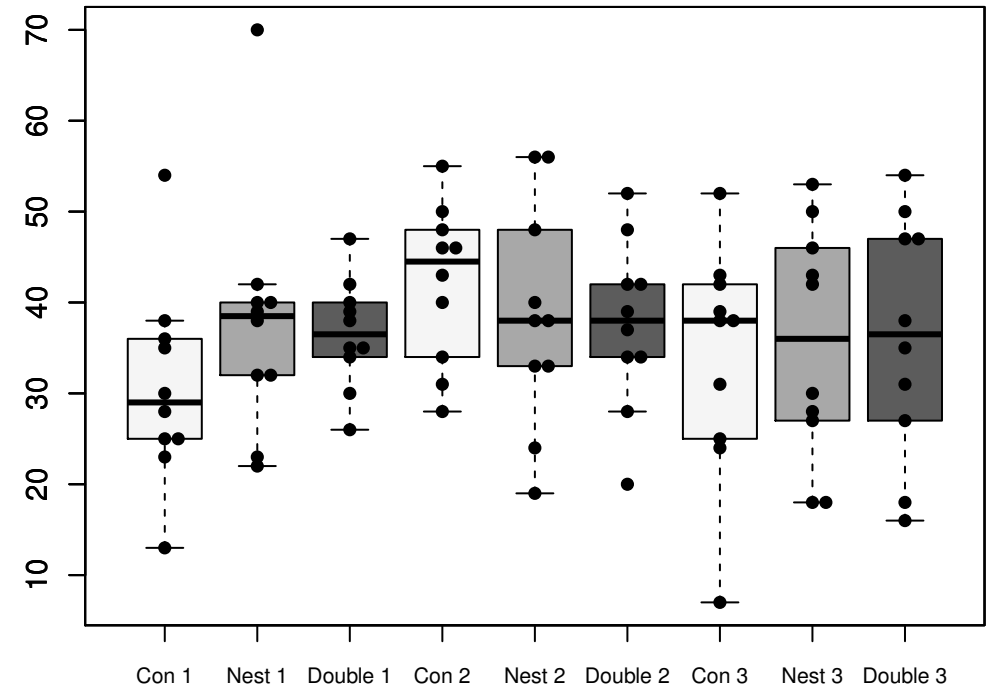

**B6 female**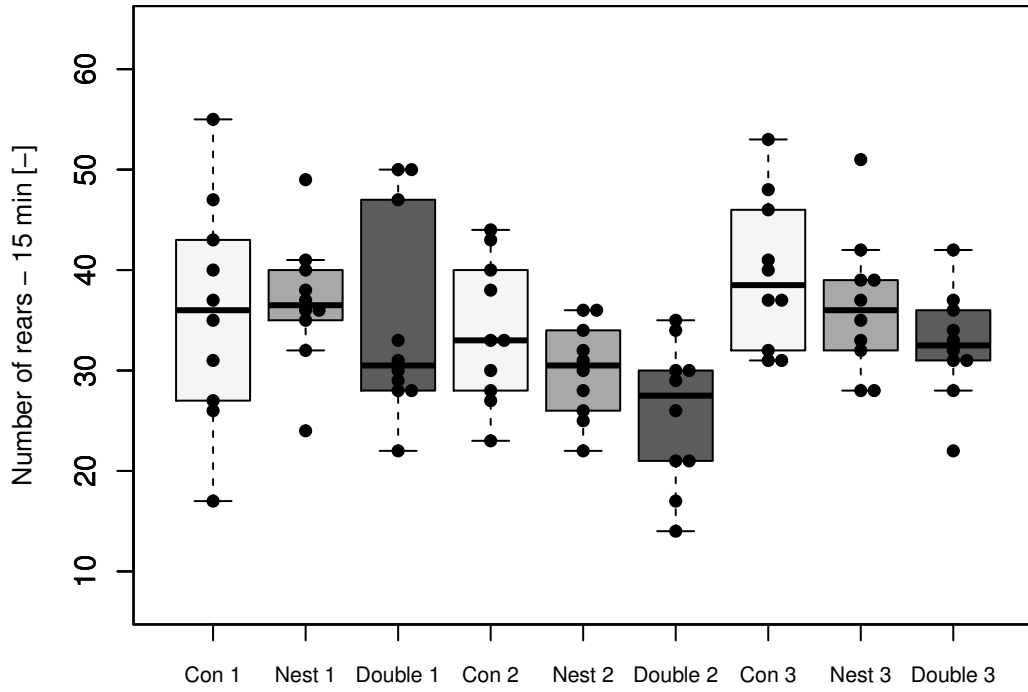**D2 female**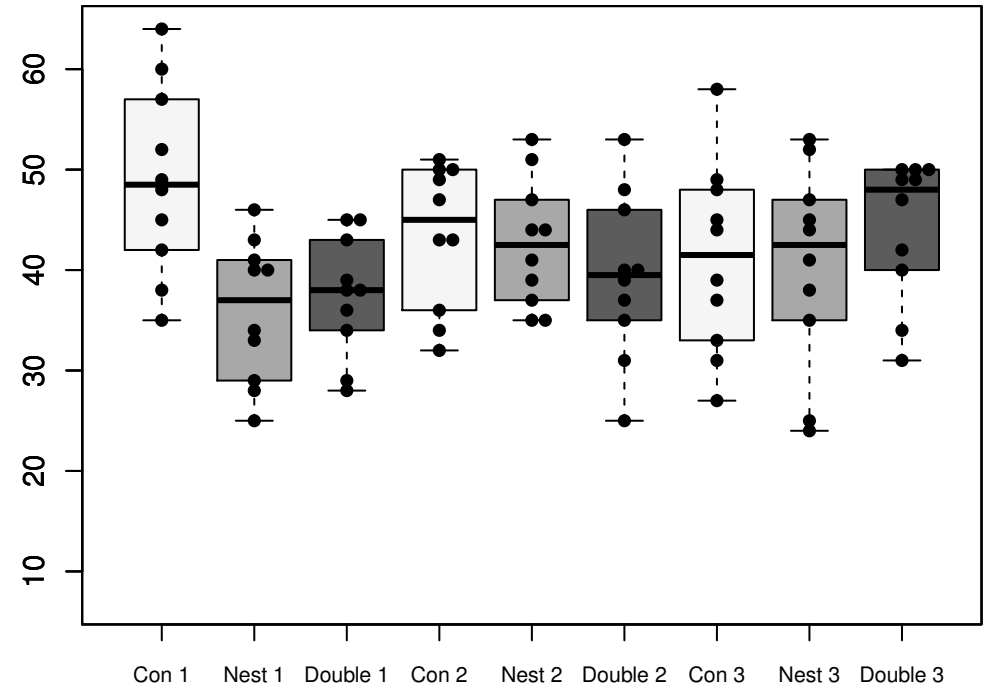**B6 male**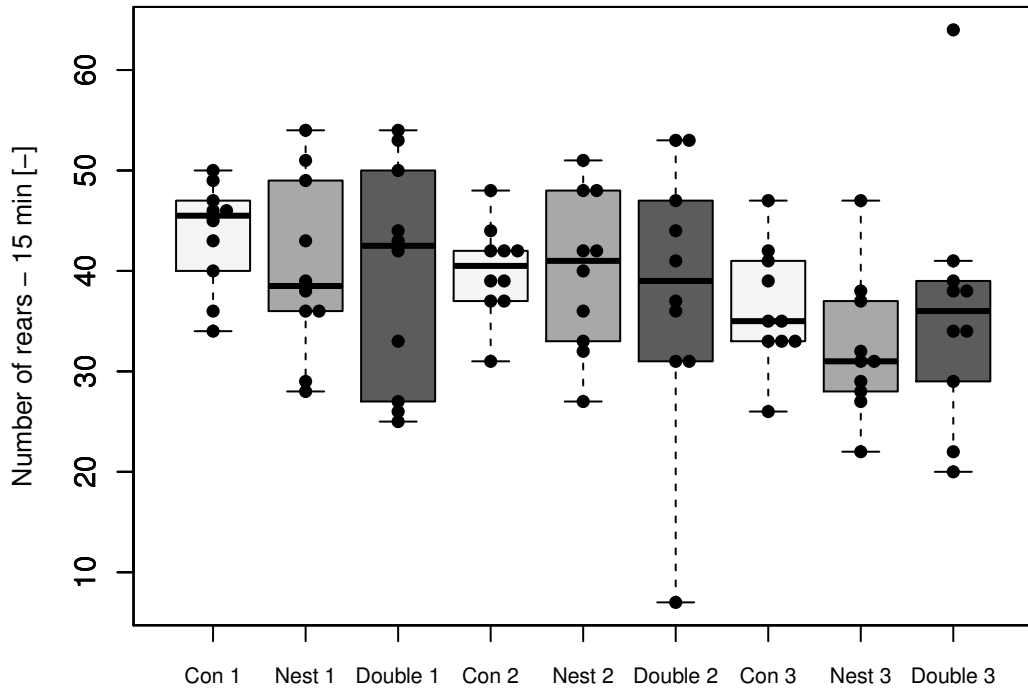**D2 male**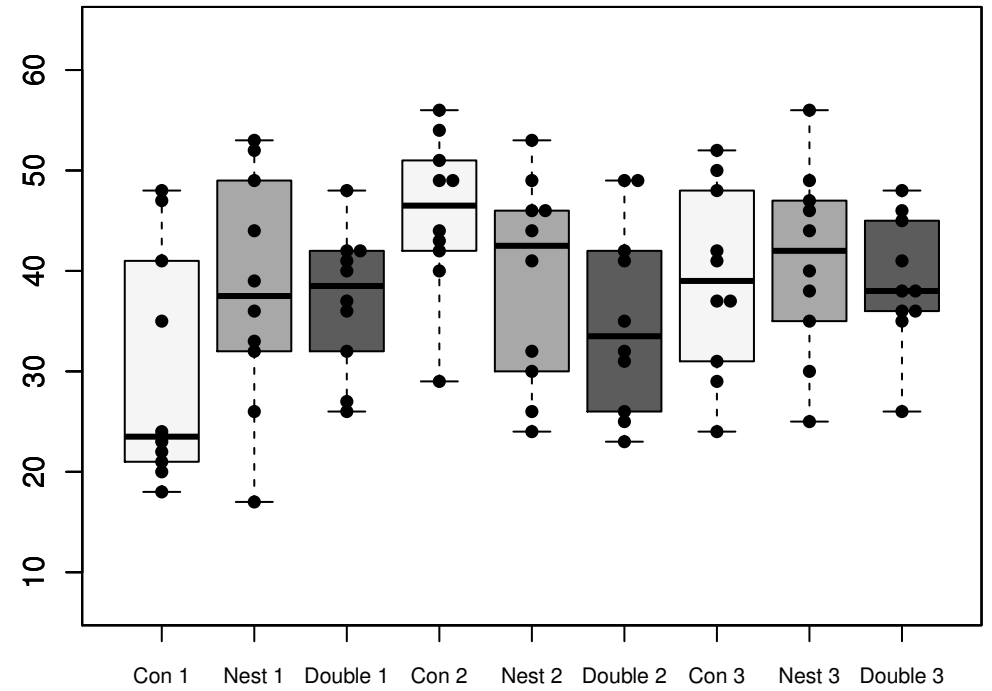



**B6 female**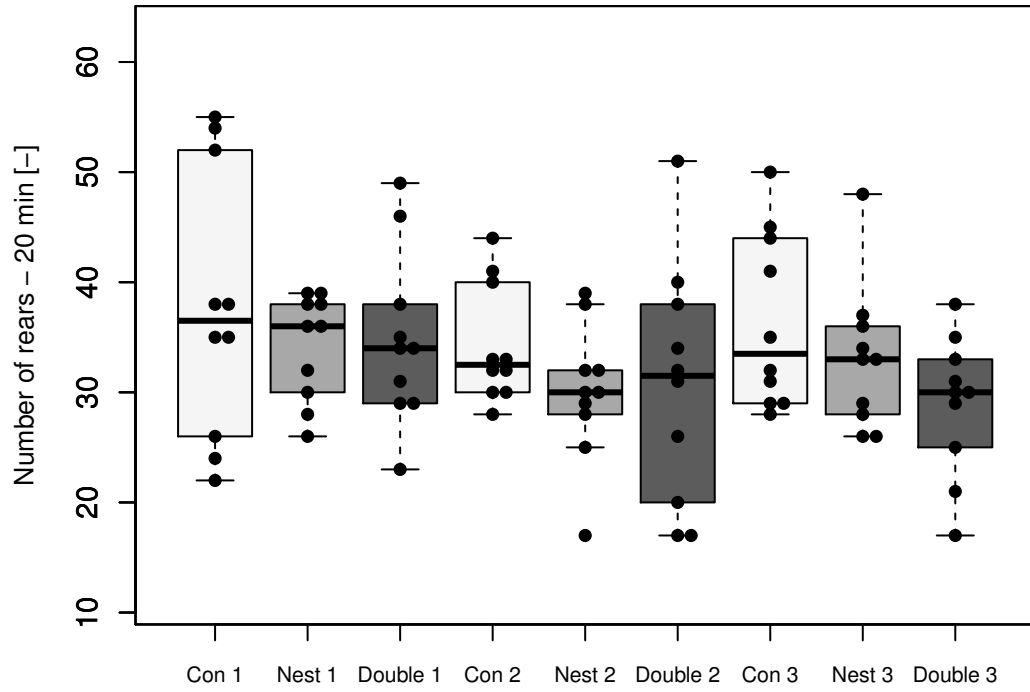**D2 female**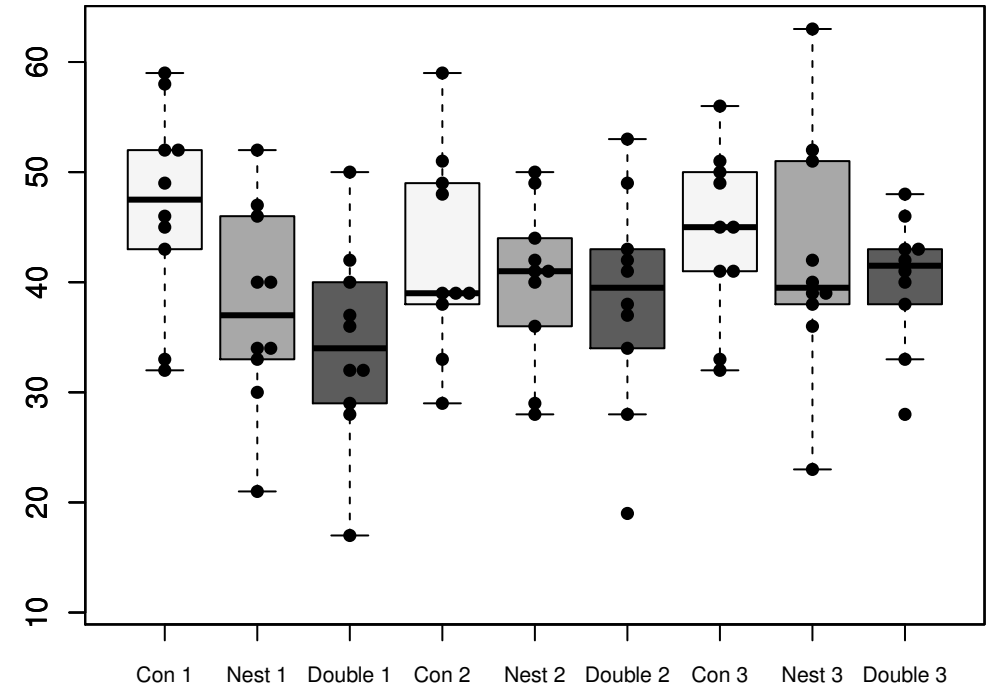**B6 male**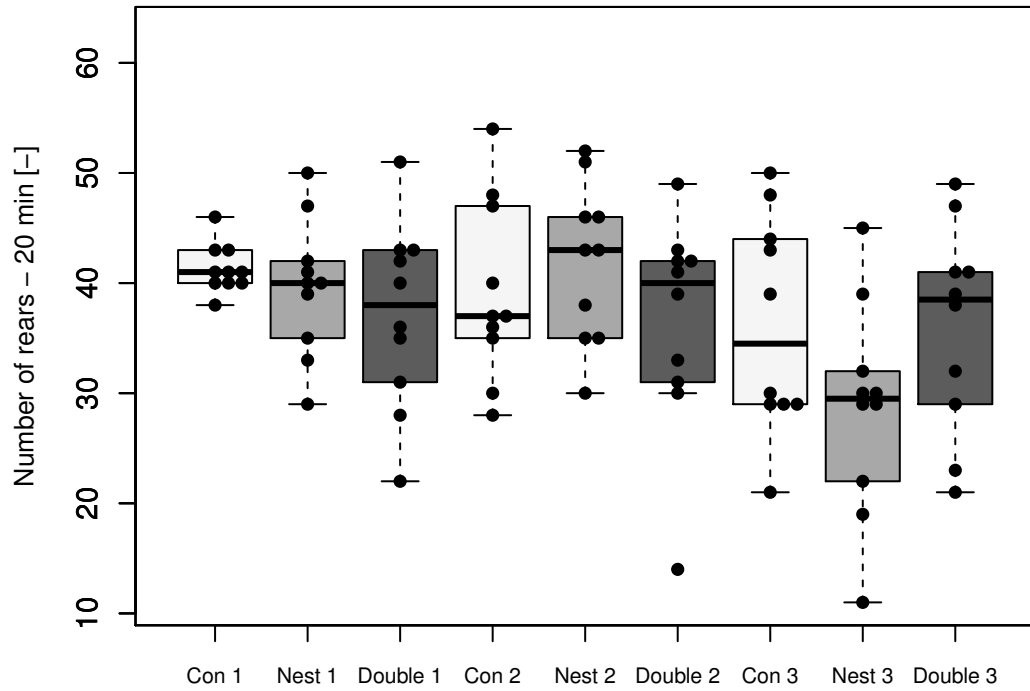**D2 male**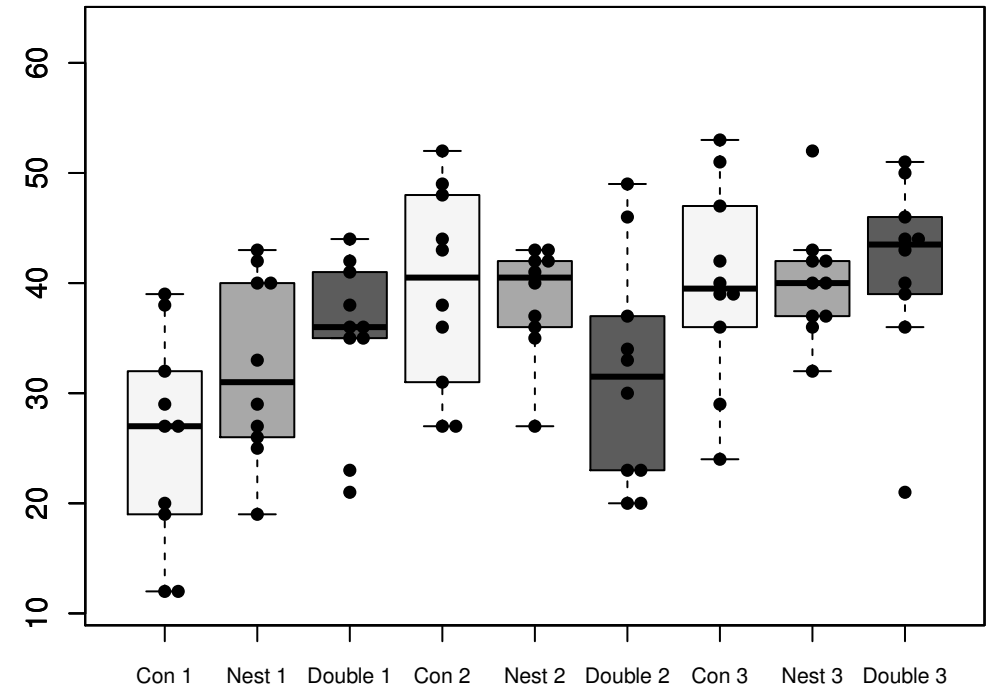

**B6 female**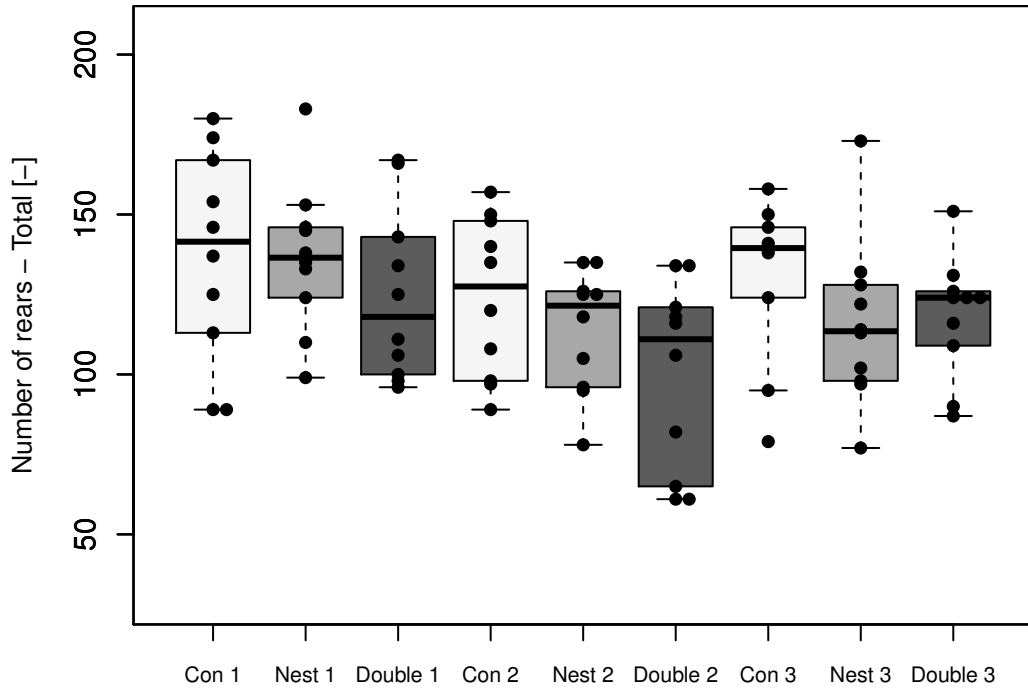**D2 female**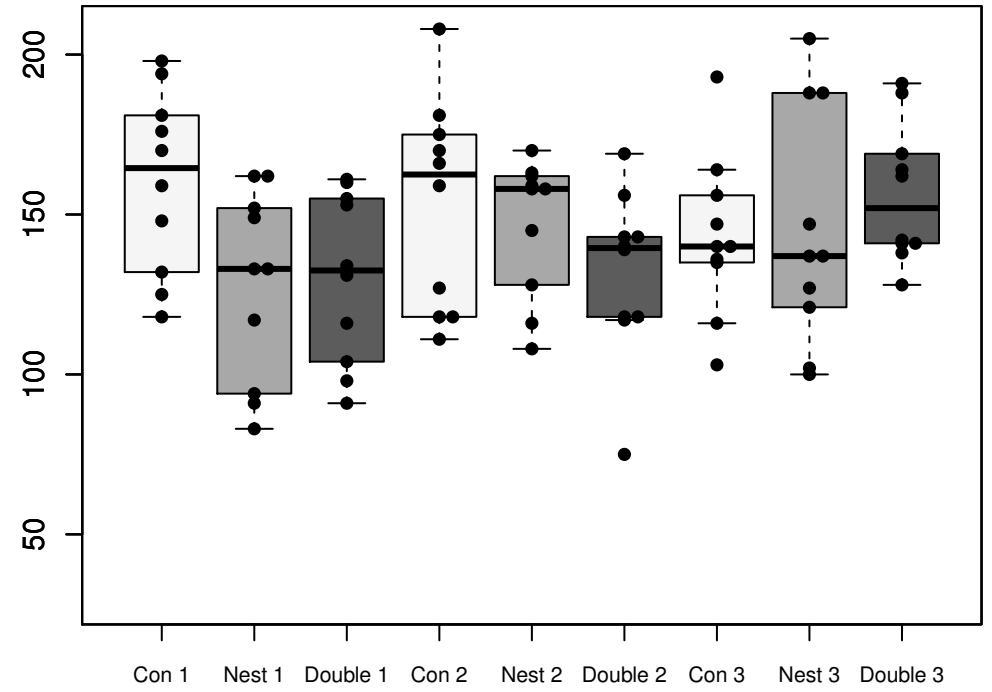**B6 male**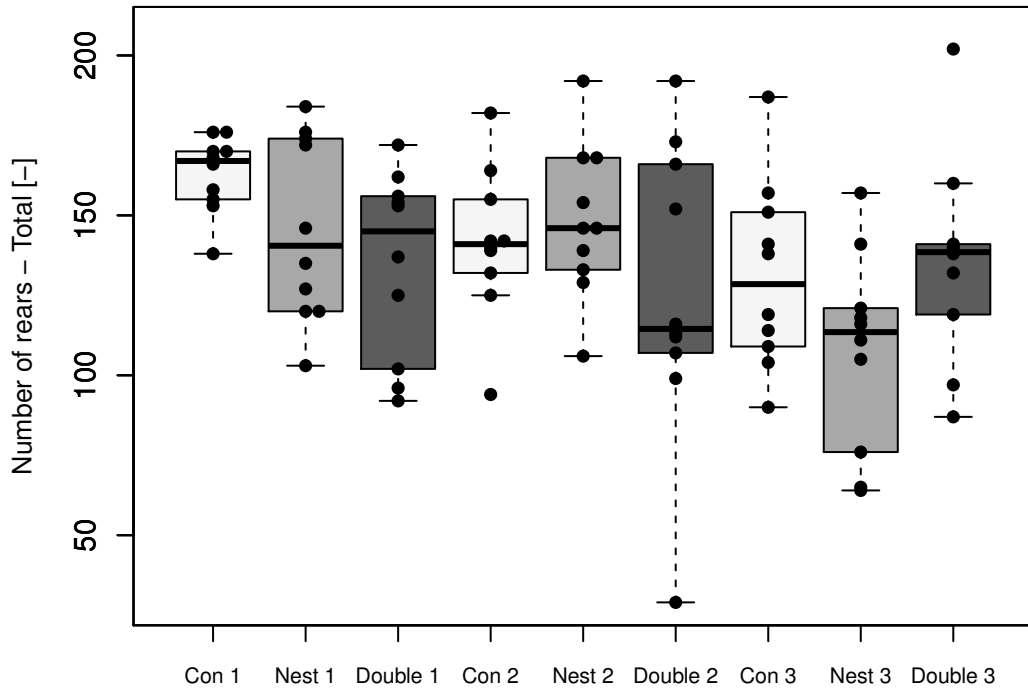**D2 male**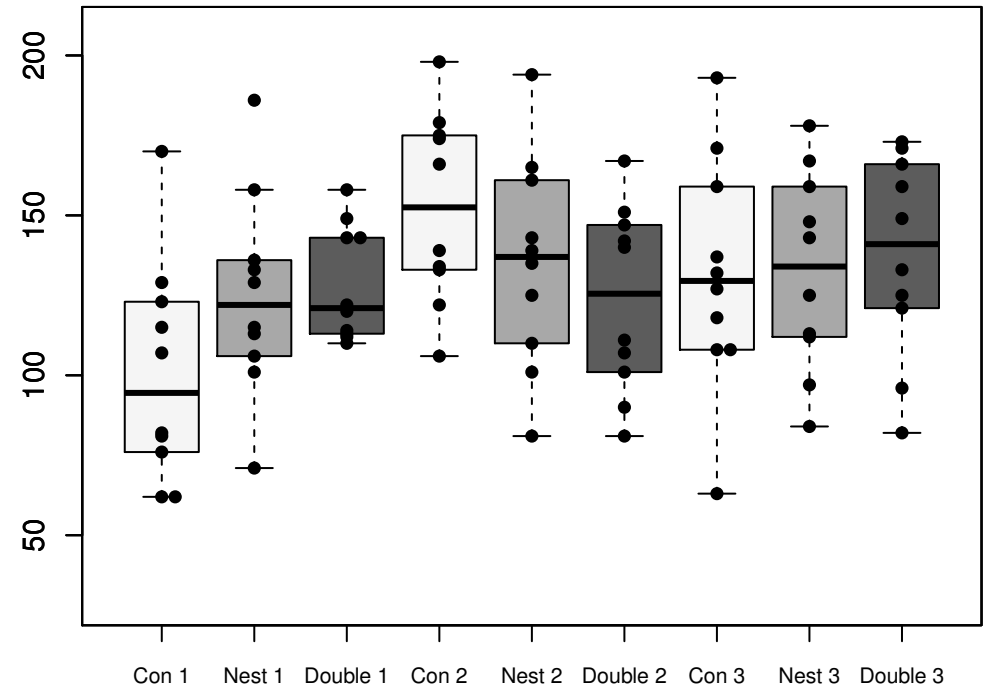

**B6 female**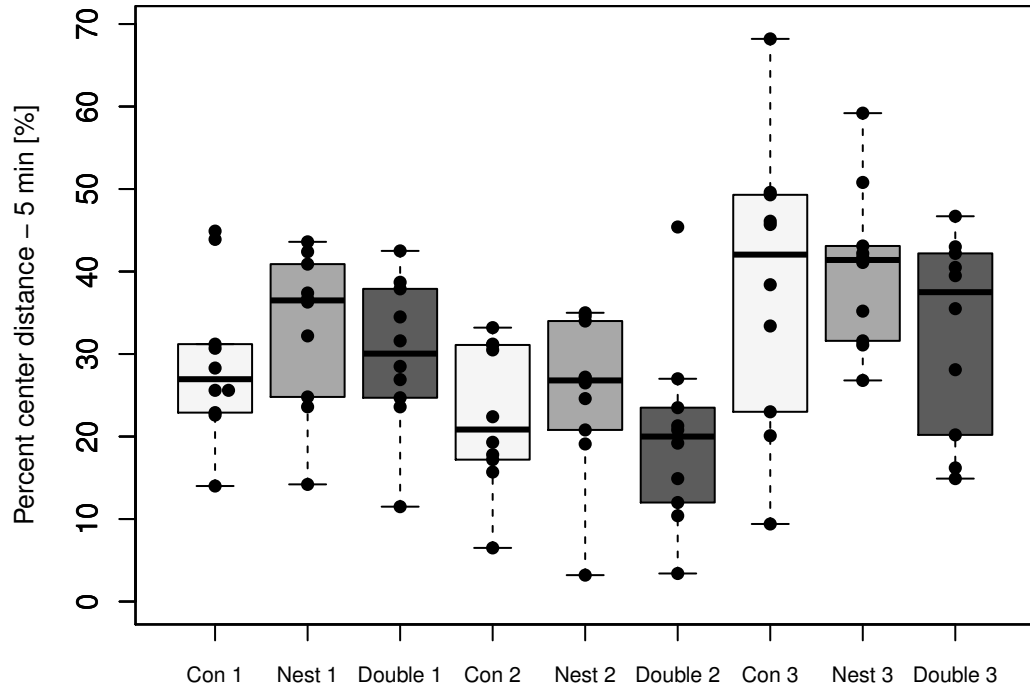**D2 female**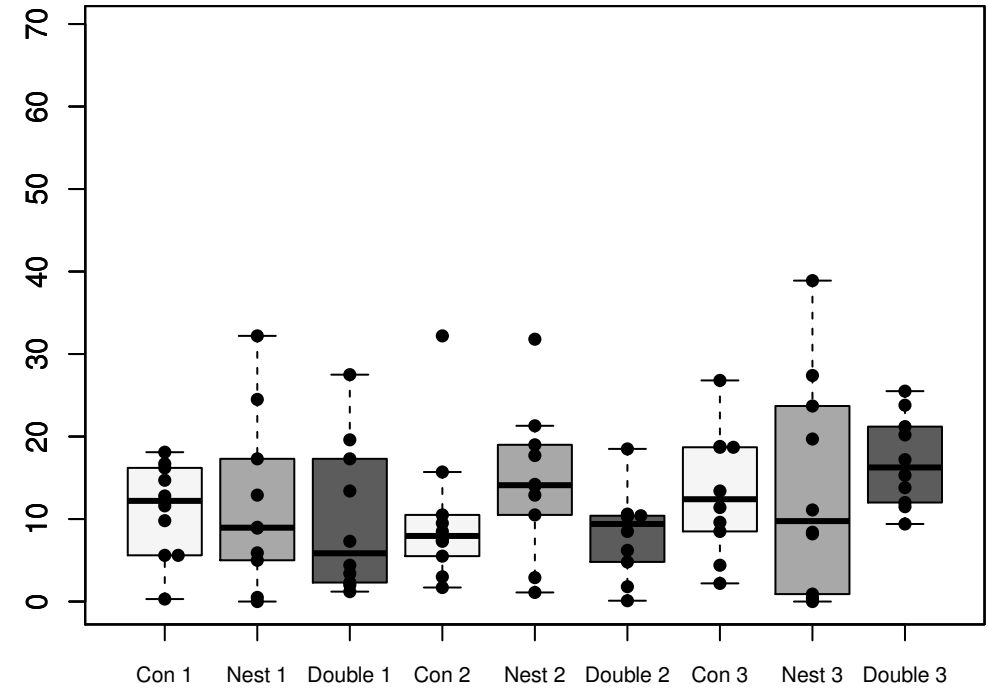**B6 male**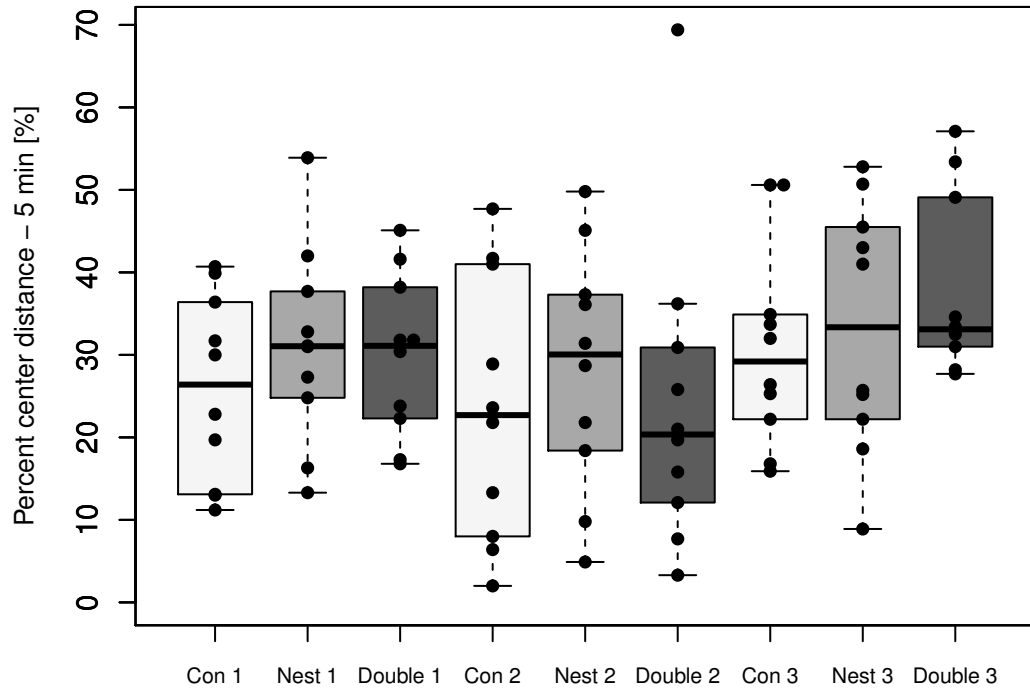**D2 male**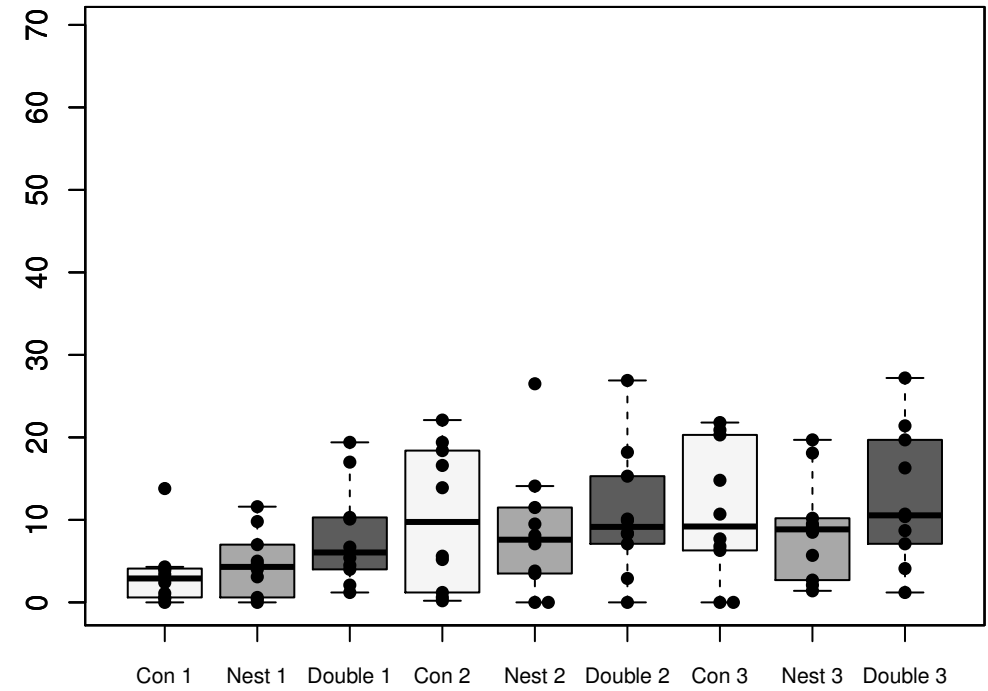

**B6 female**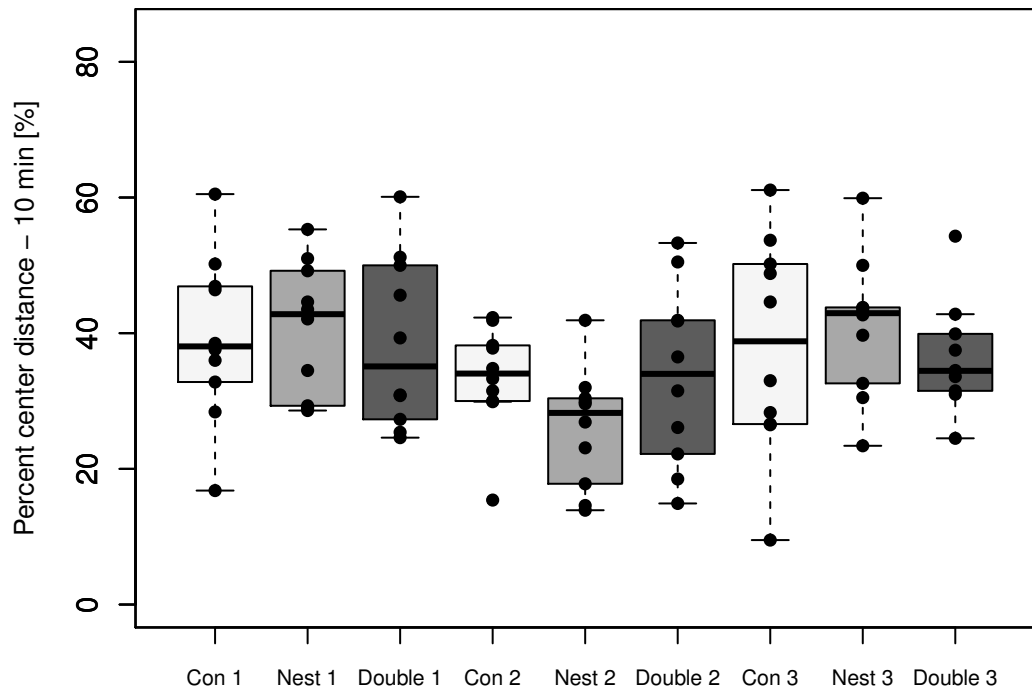**D2 female**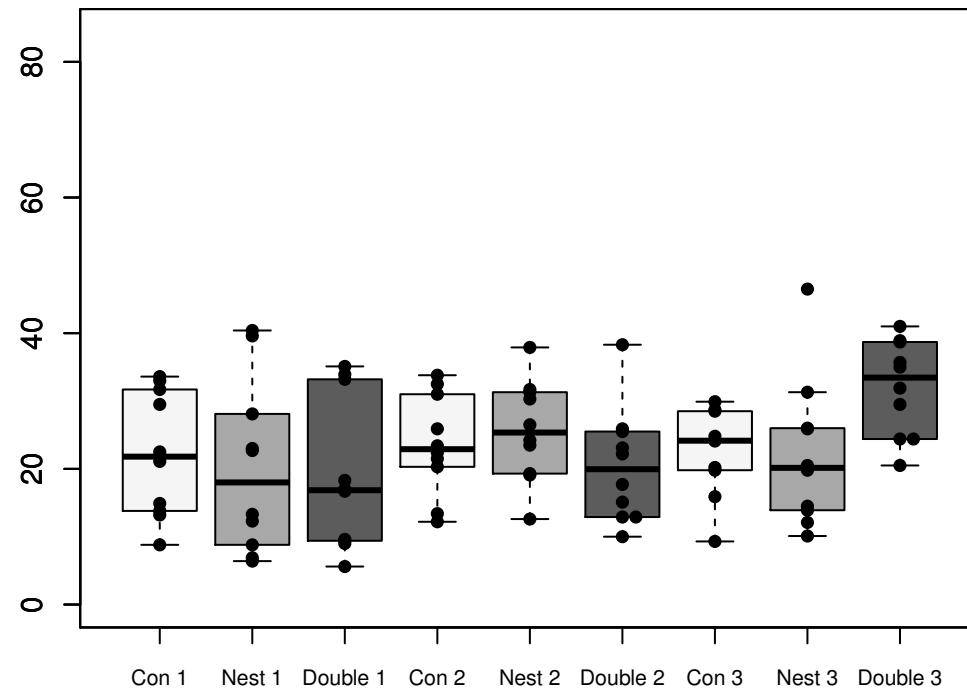**B6 male**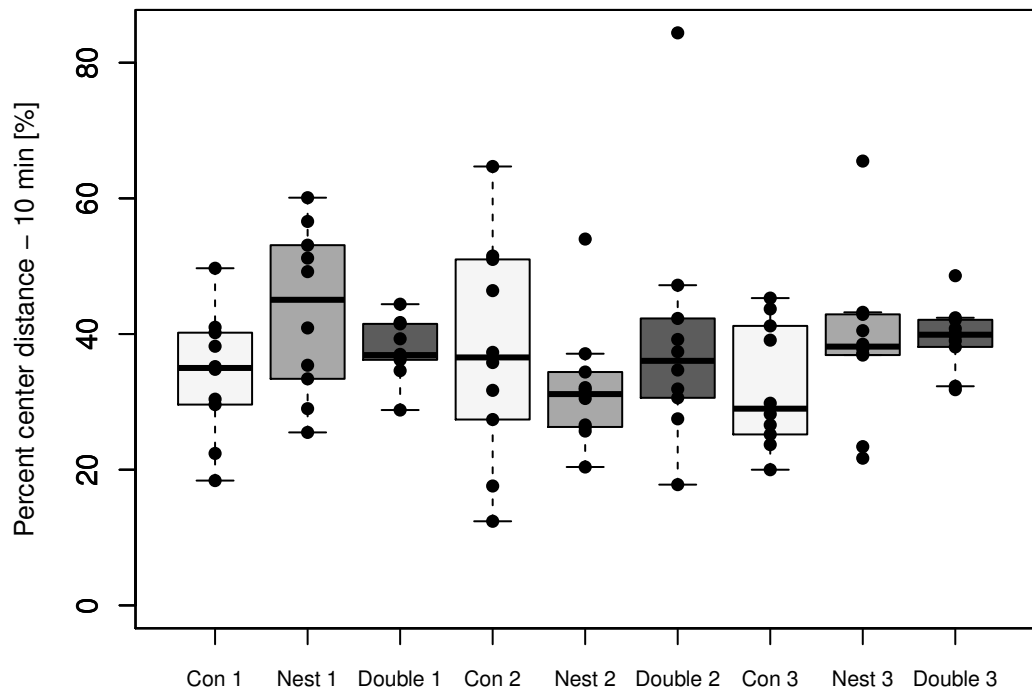**D2 male**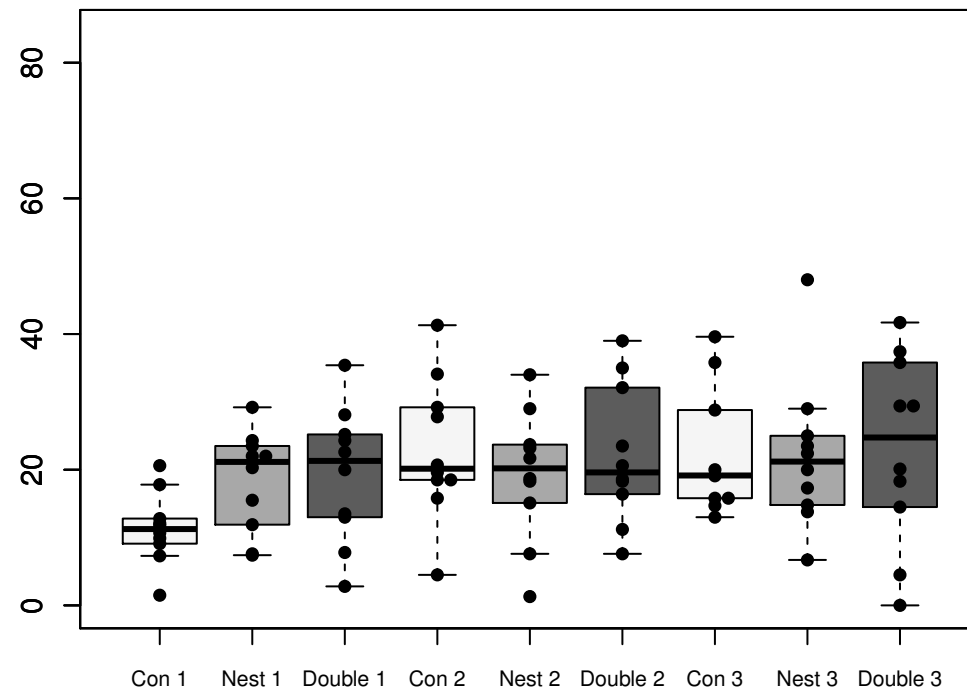

**B6 female**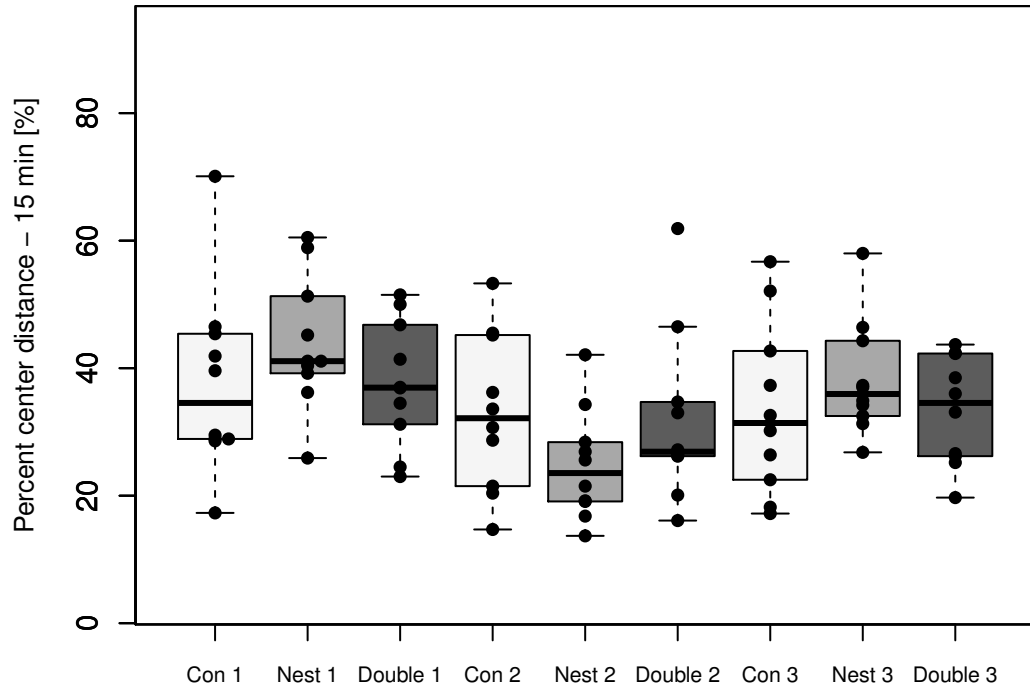**D2 female**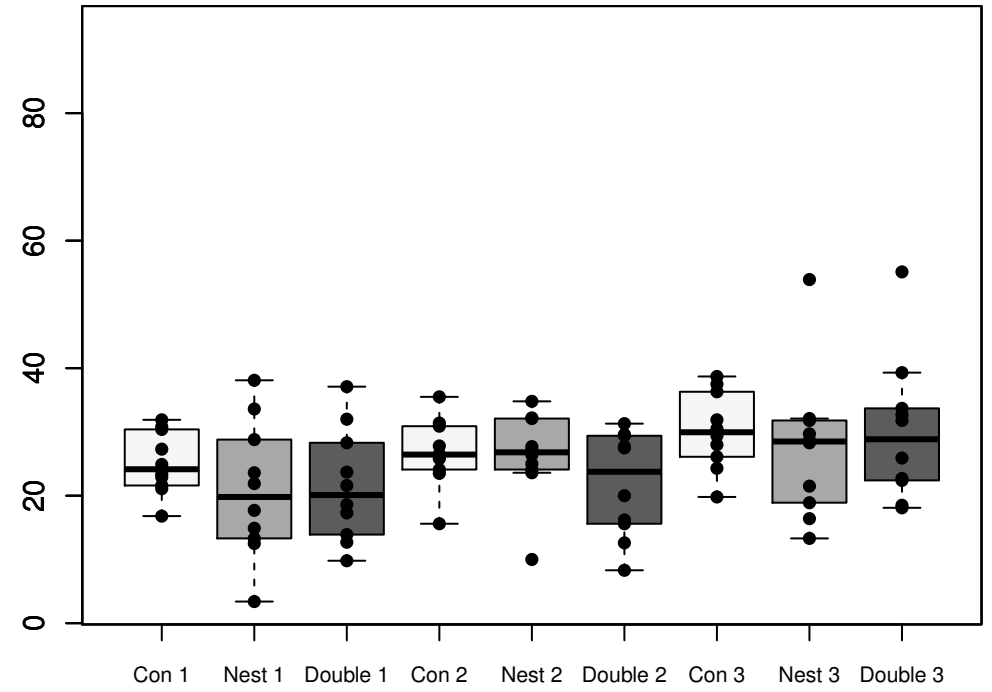**B6 male**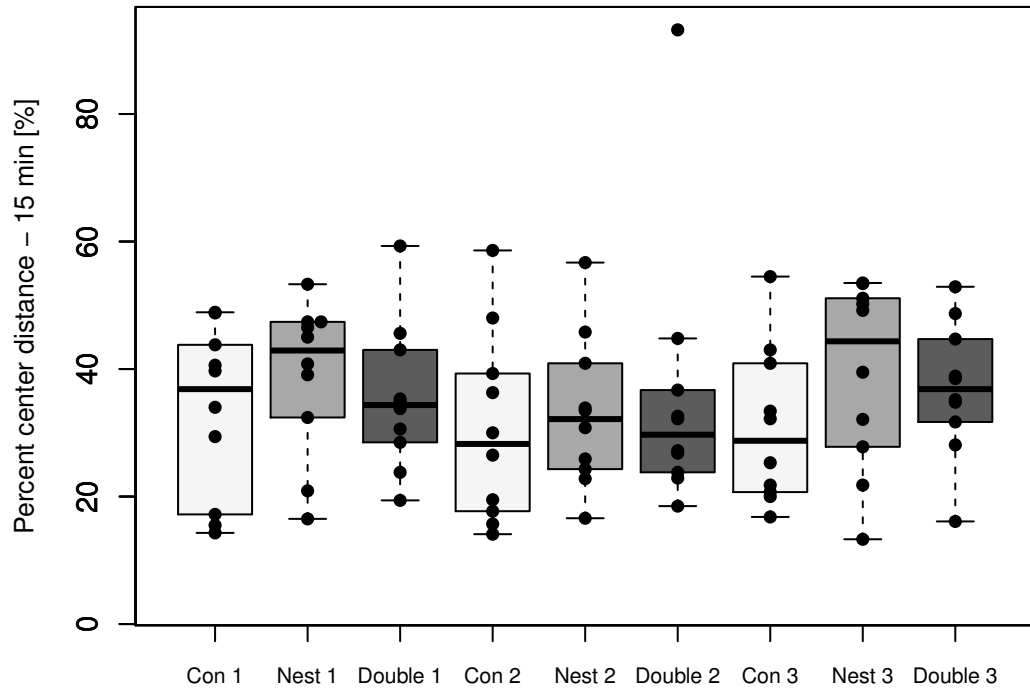**D2 male**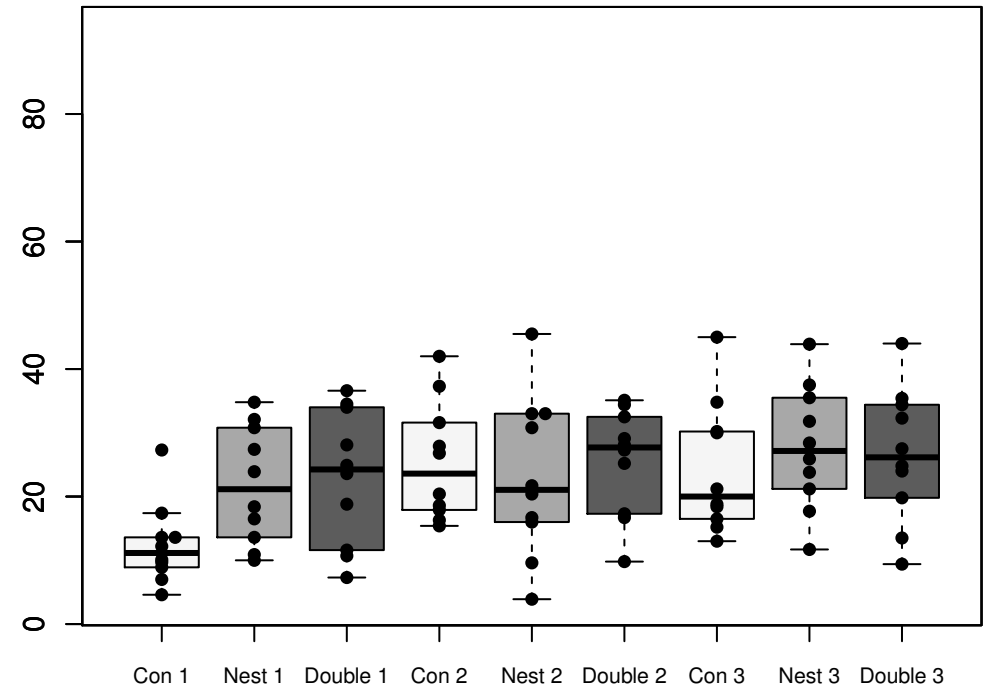

**B6 female**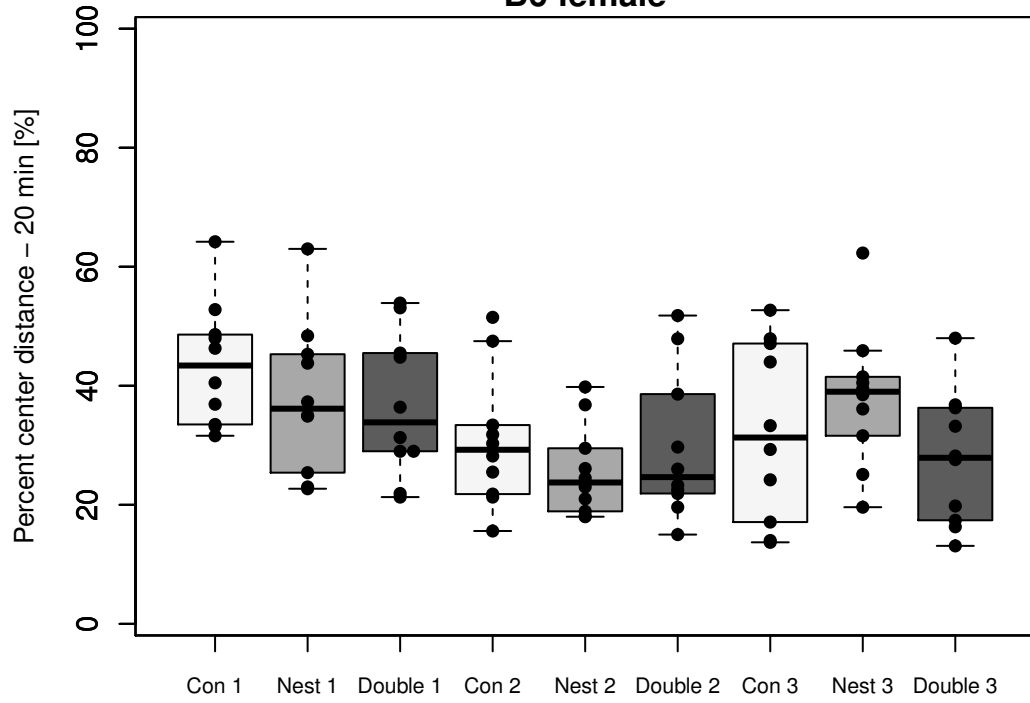**D2 female**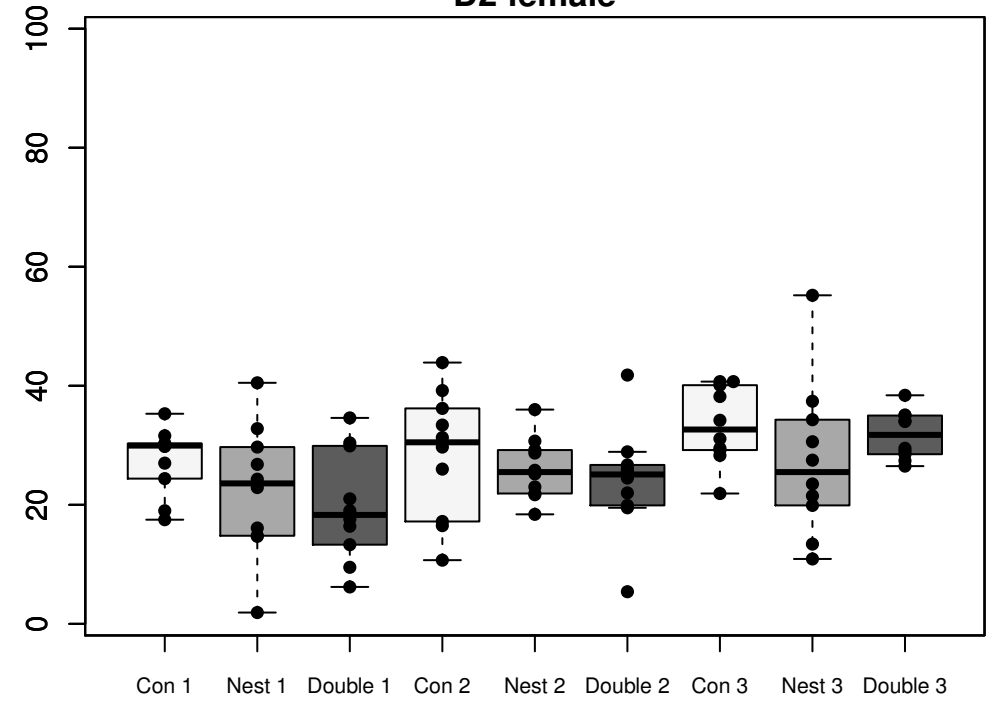**B6 male**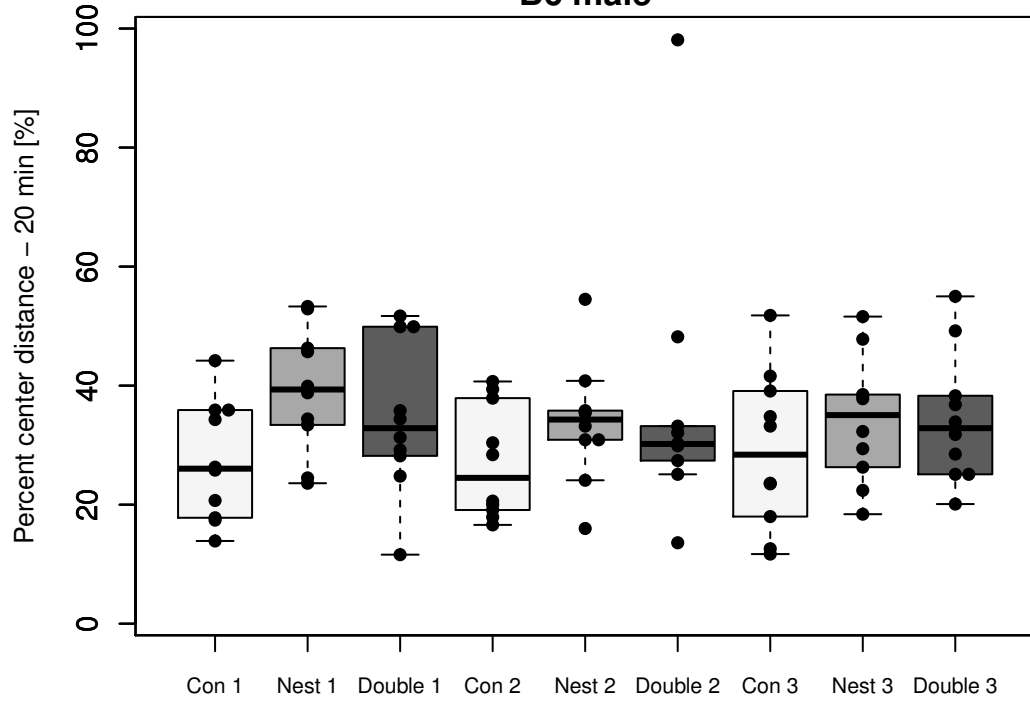**D2 male**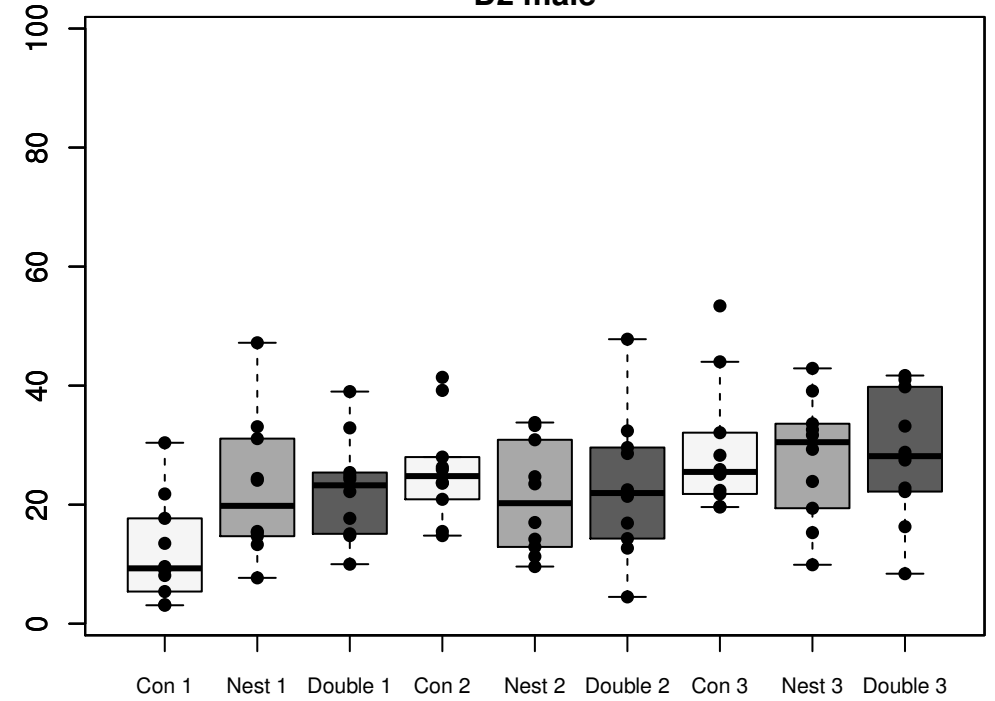

**B6 female**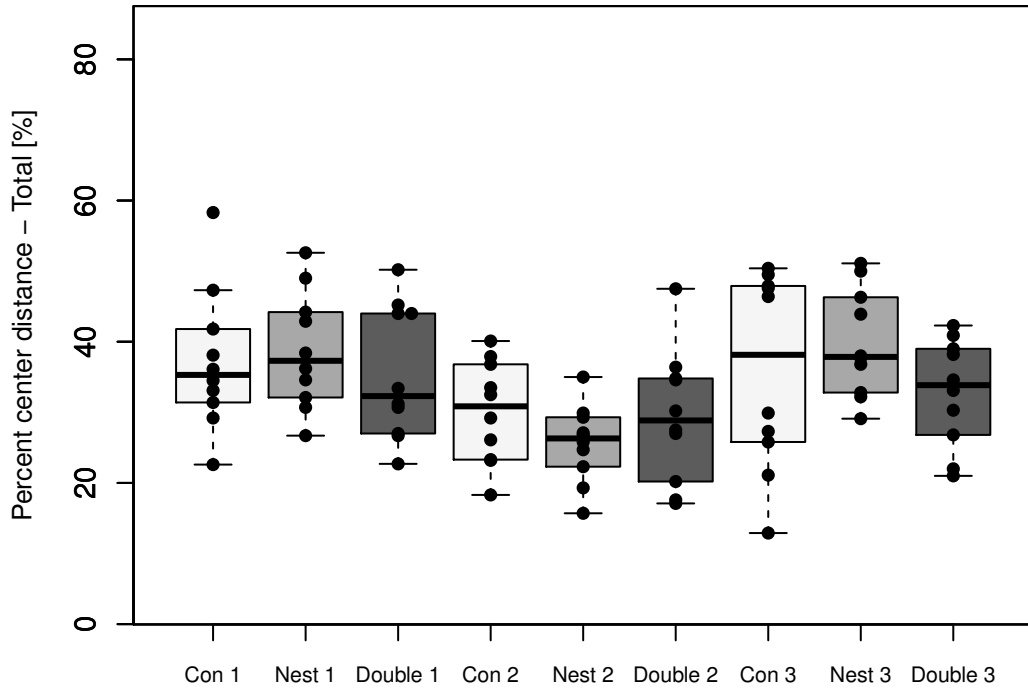**D2 female**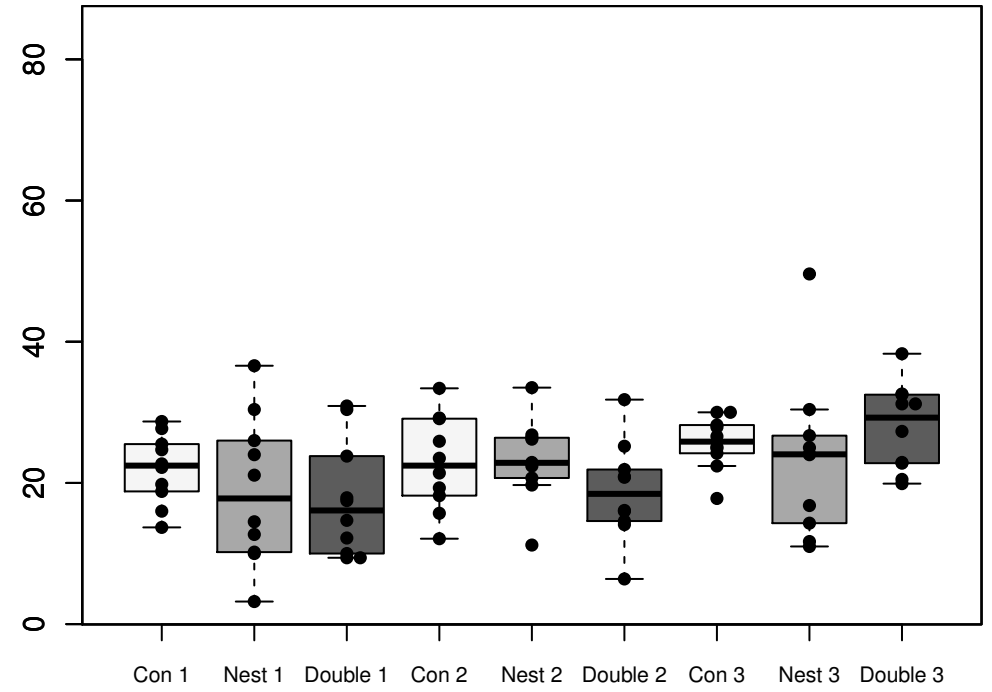**B6 male**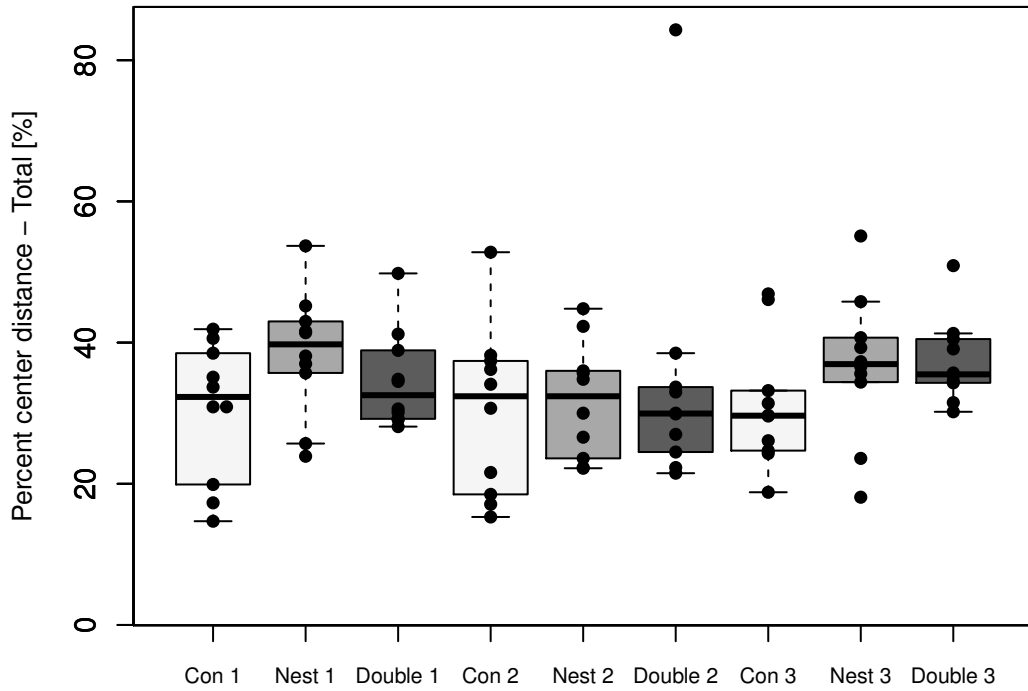**D2 male**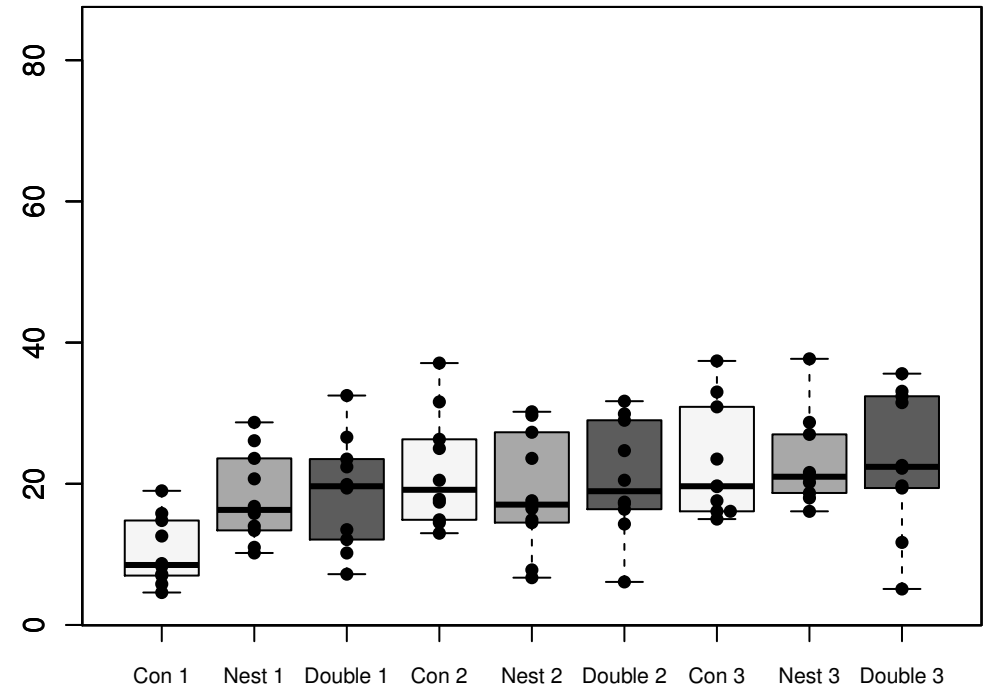

**B6 female**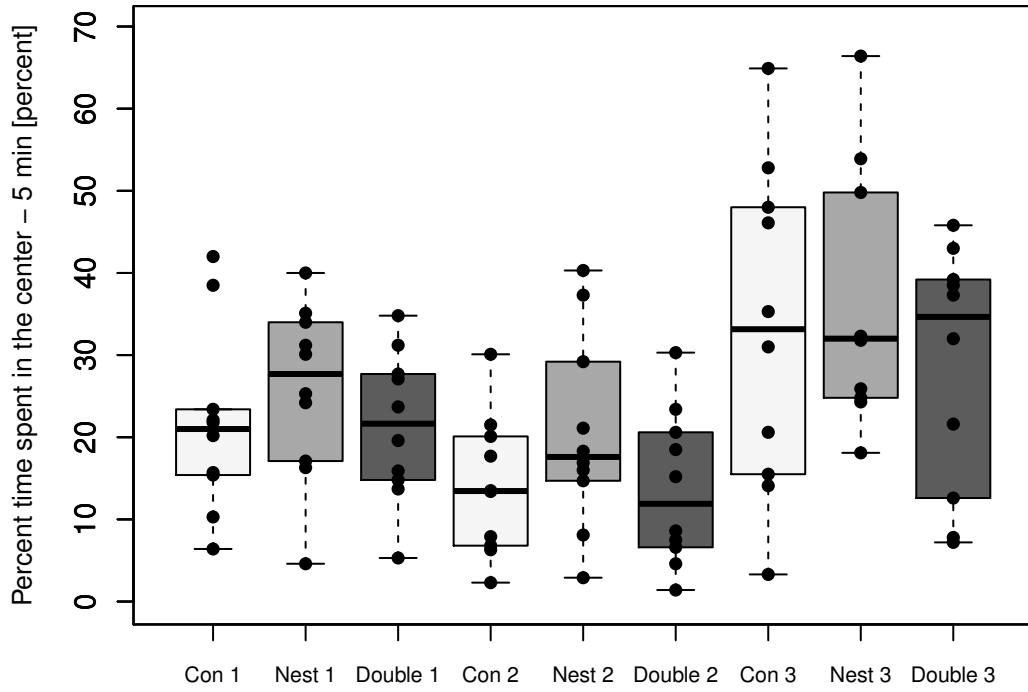**D2 female**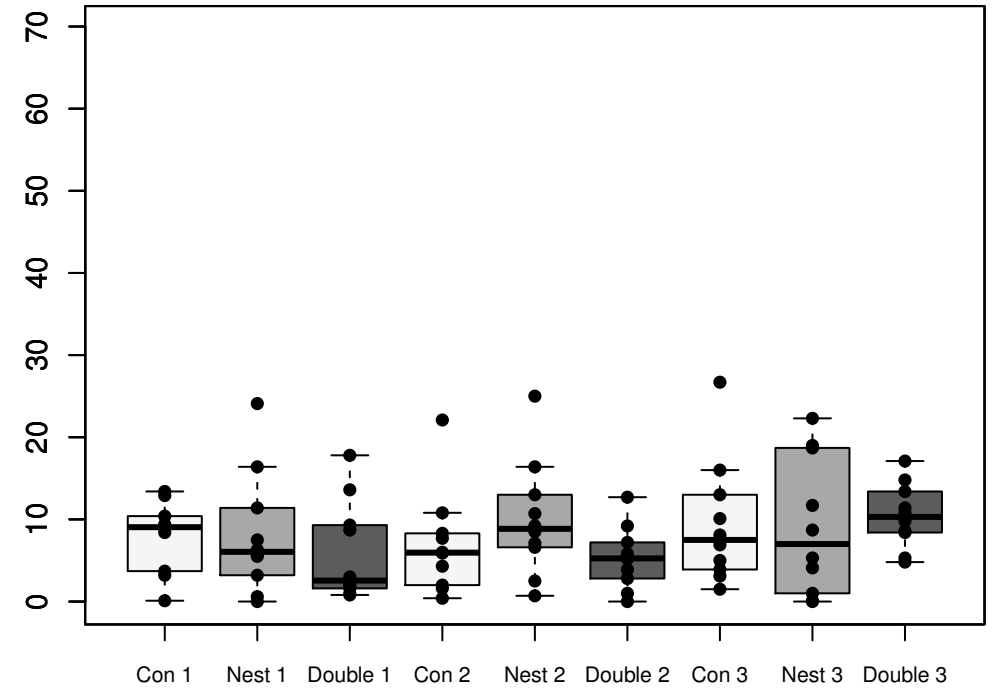**B6 male**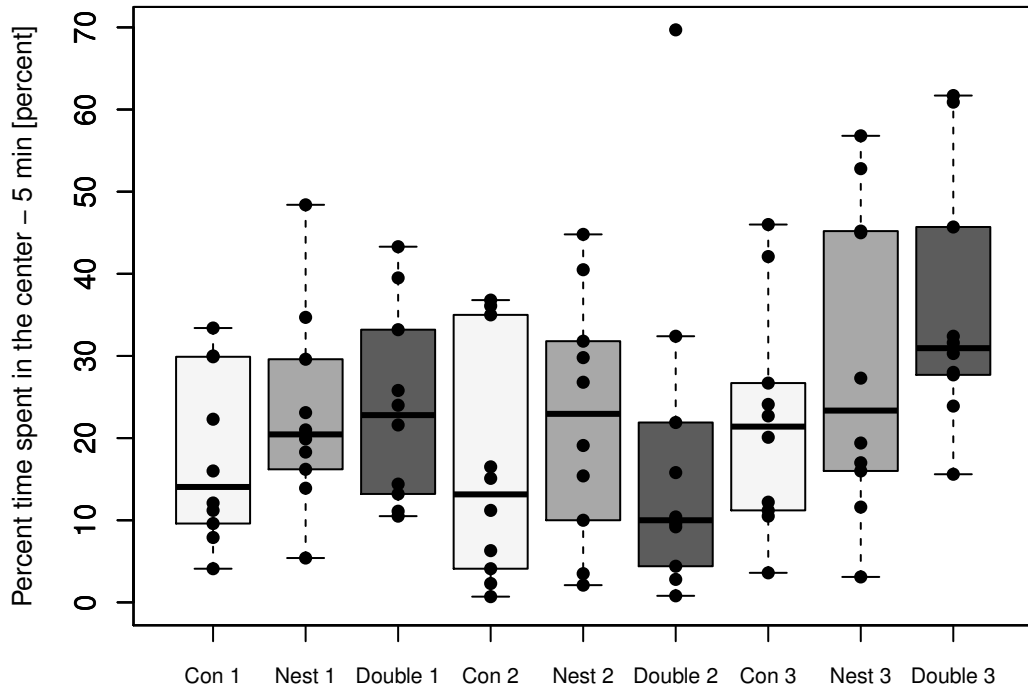**D2 male**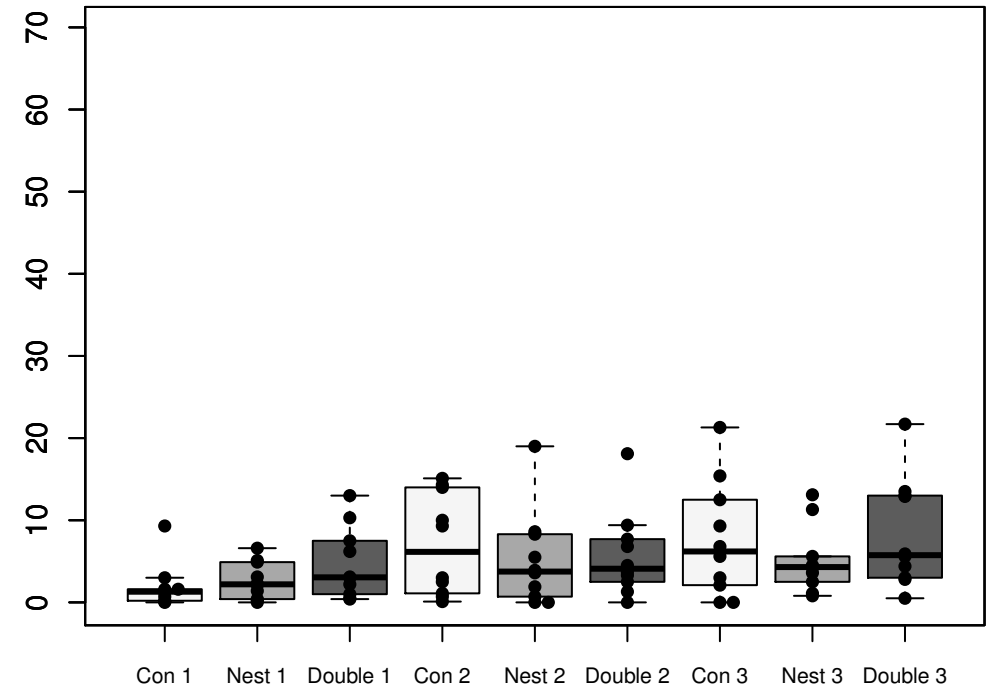



**B6 female**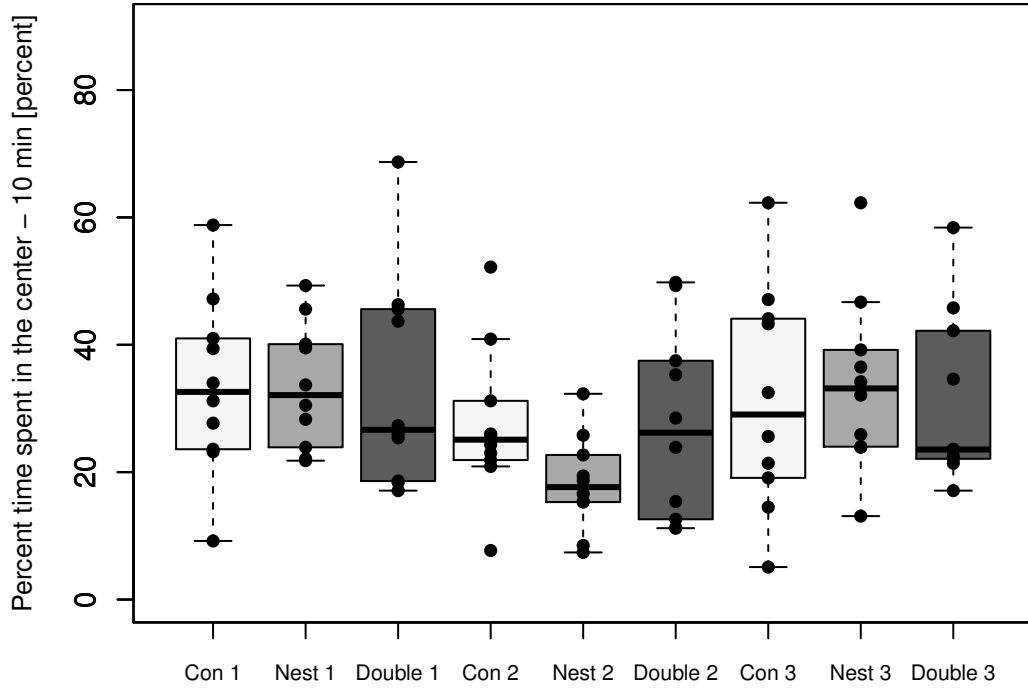**D2 female**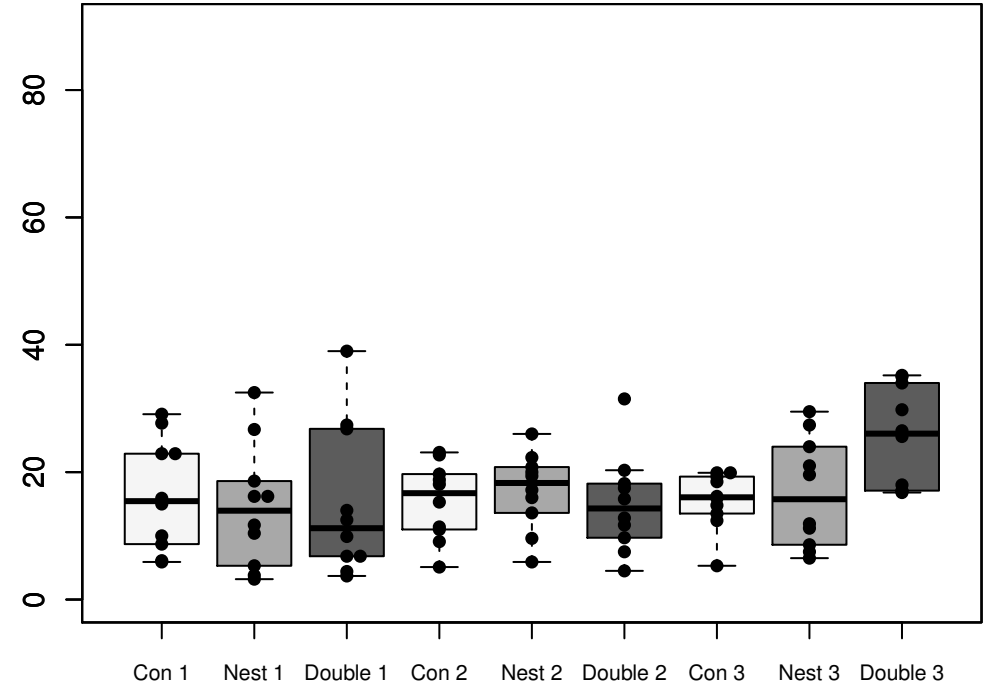**B6 male**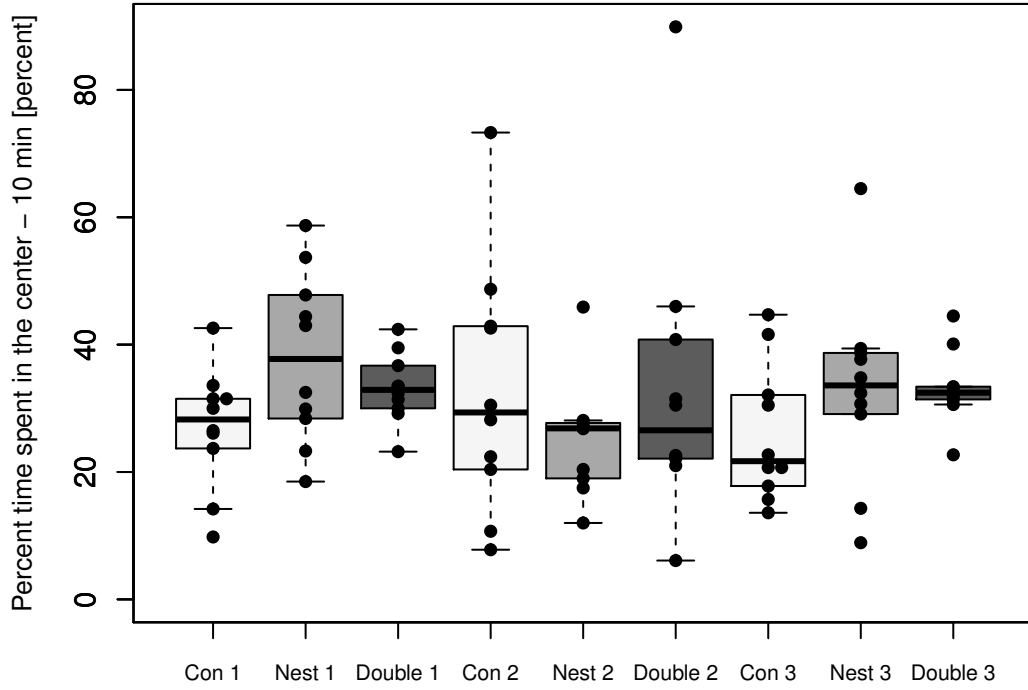**D2 male**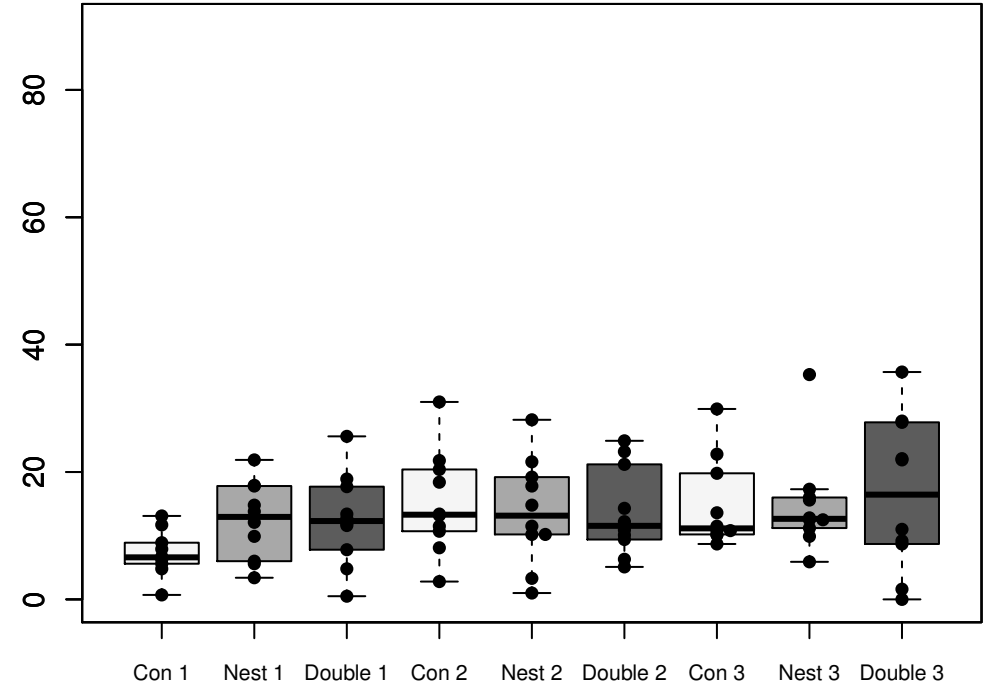

**B6 female**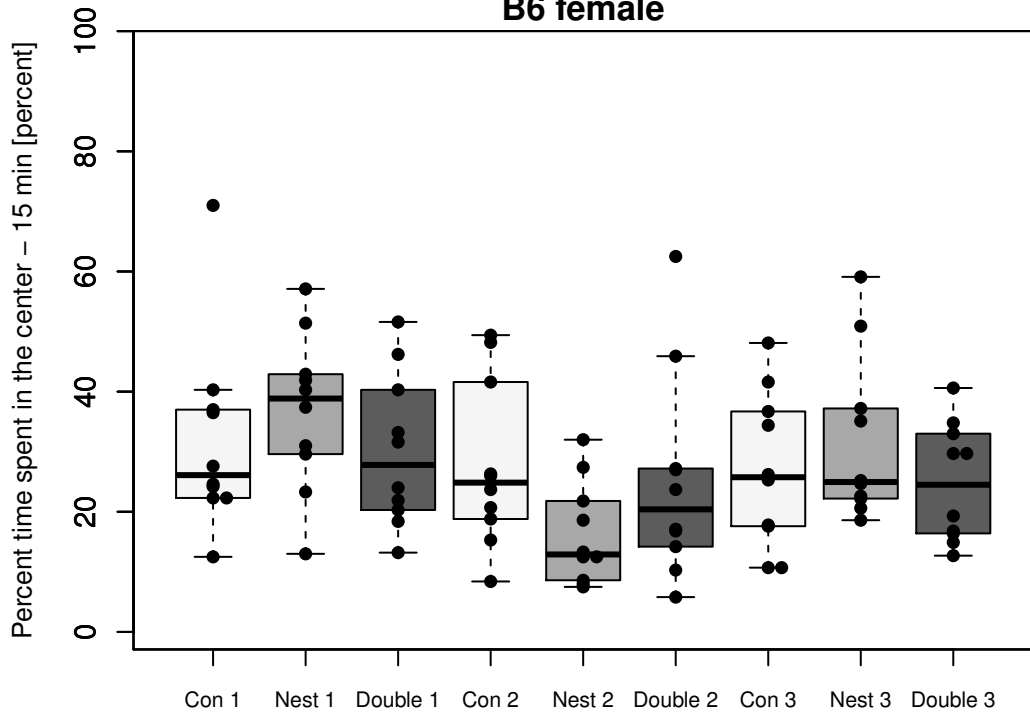**D2 female**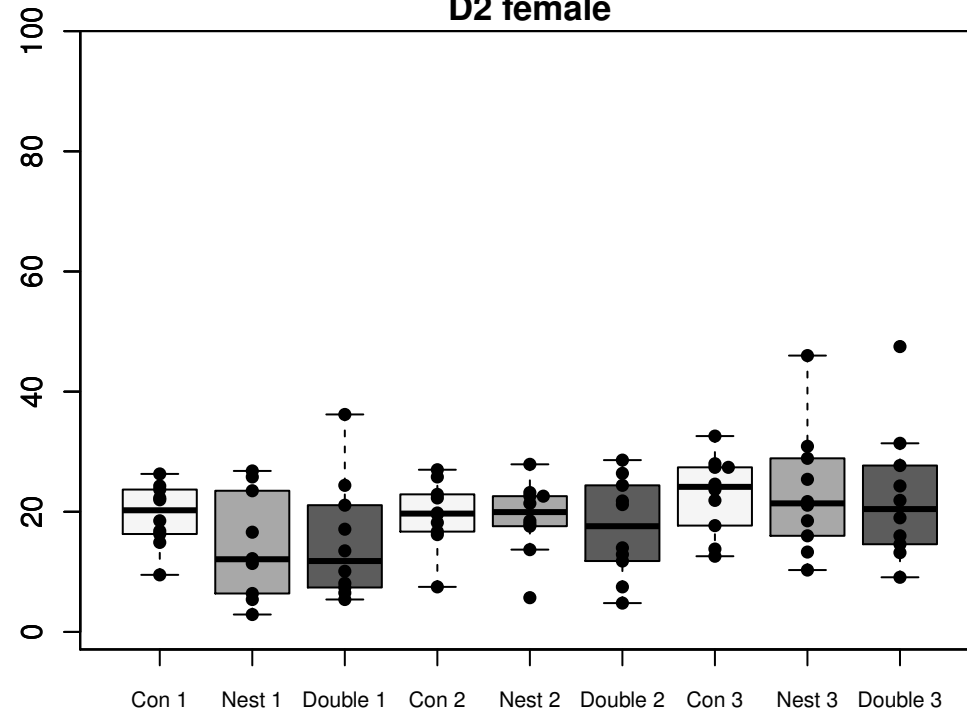**B6 male**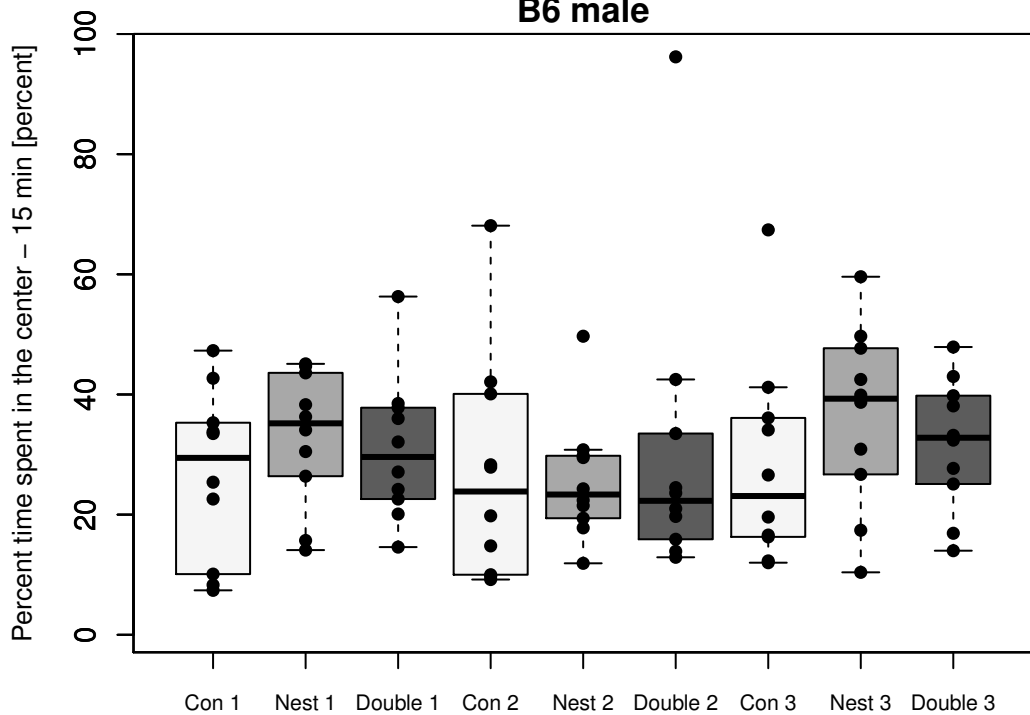**D2 male**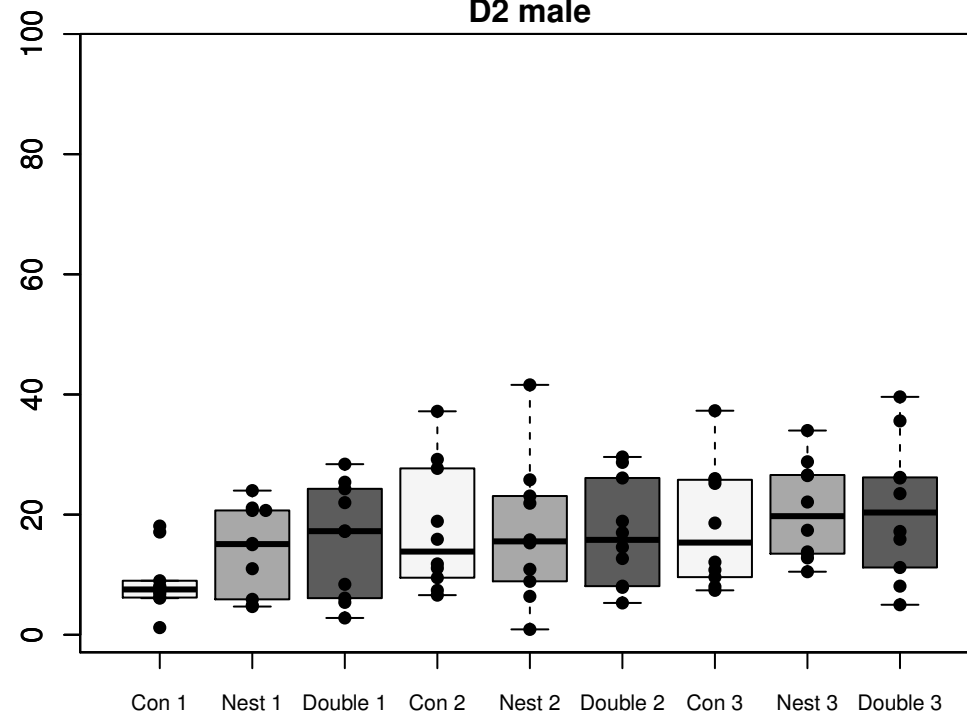

**B6 female**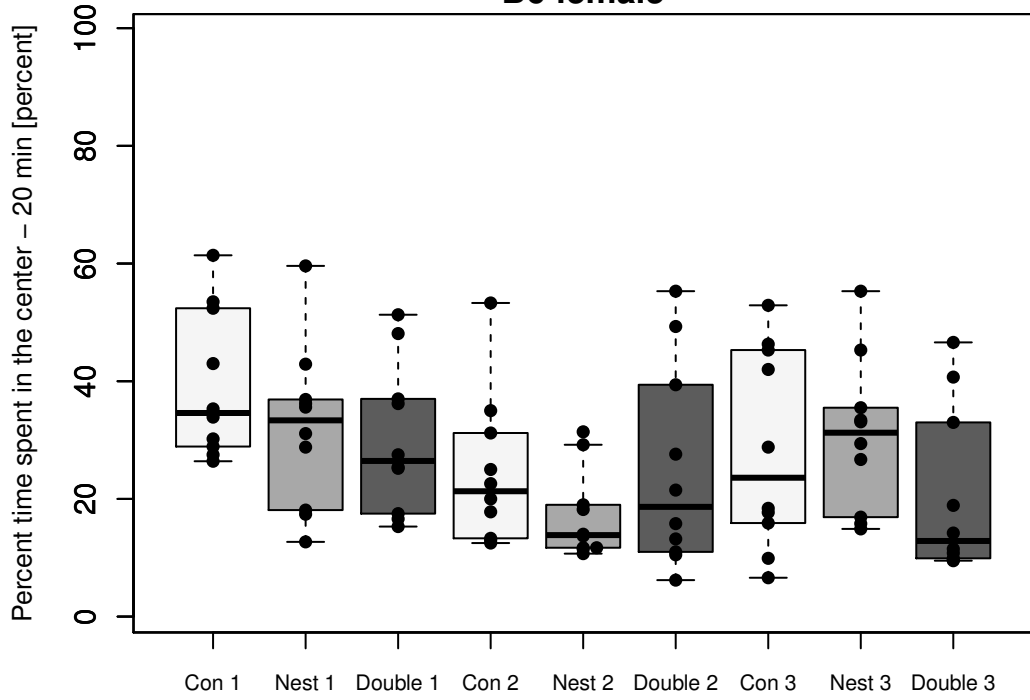**D2 female**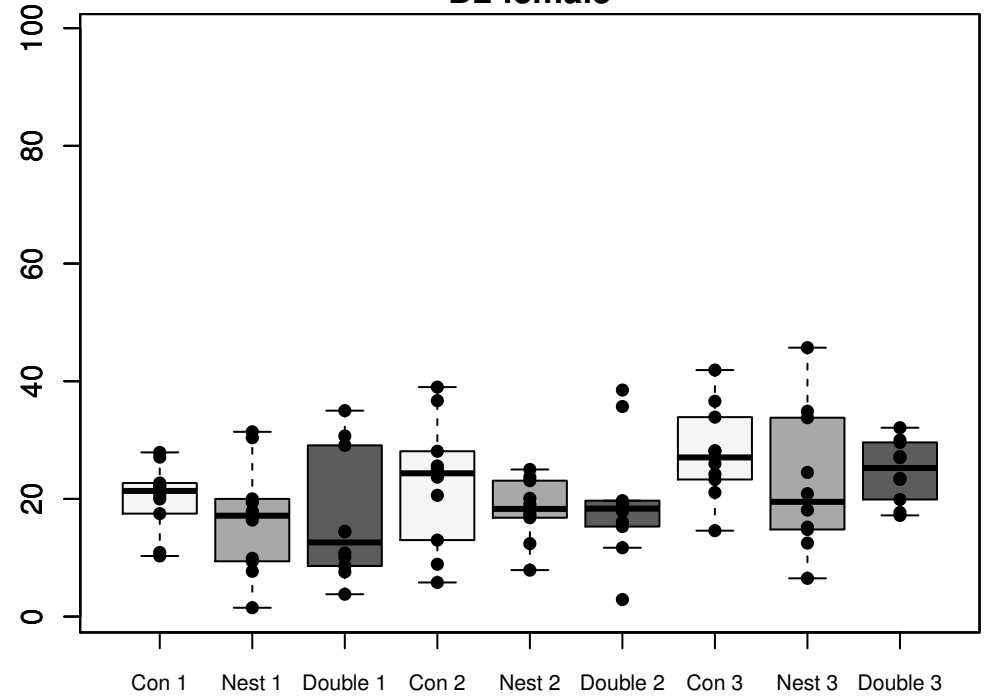**B6 male**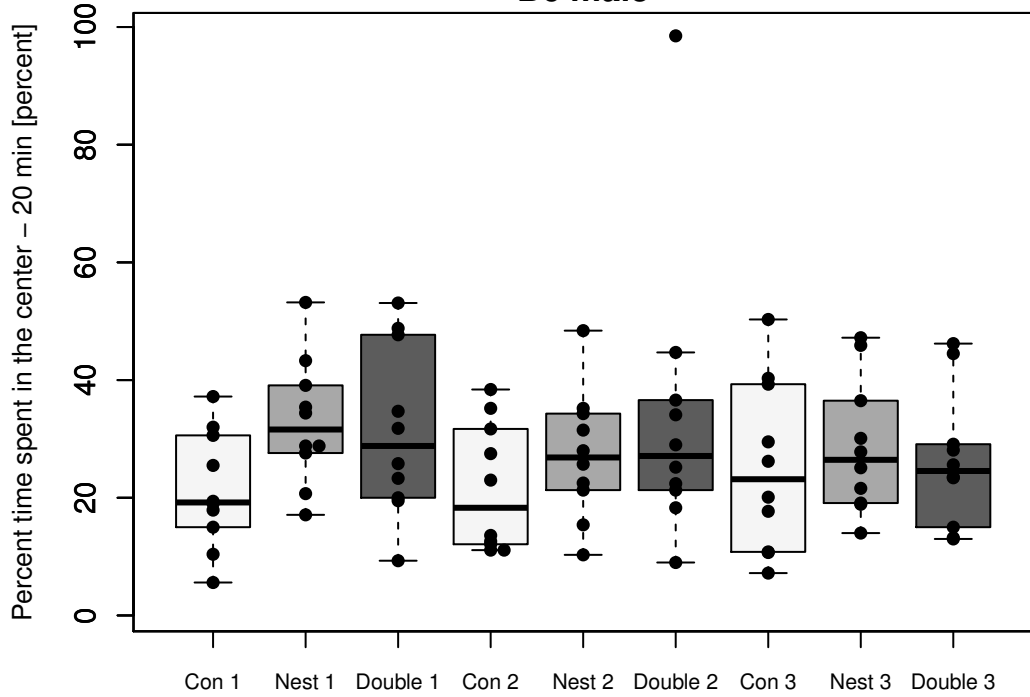**D2 male**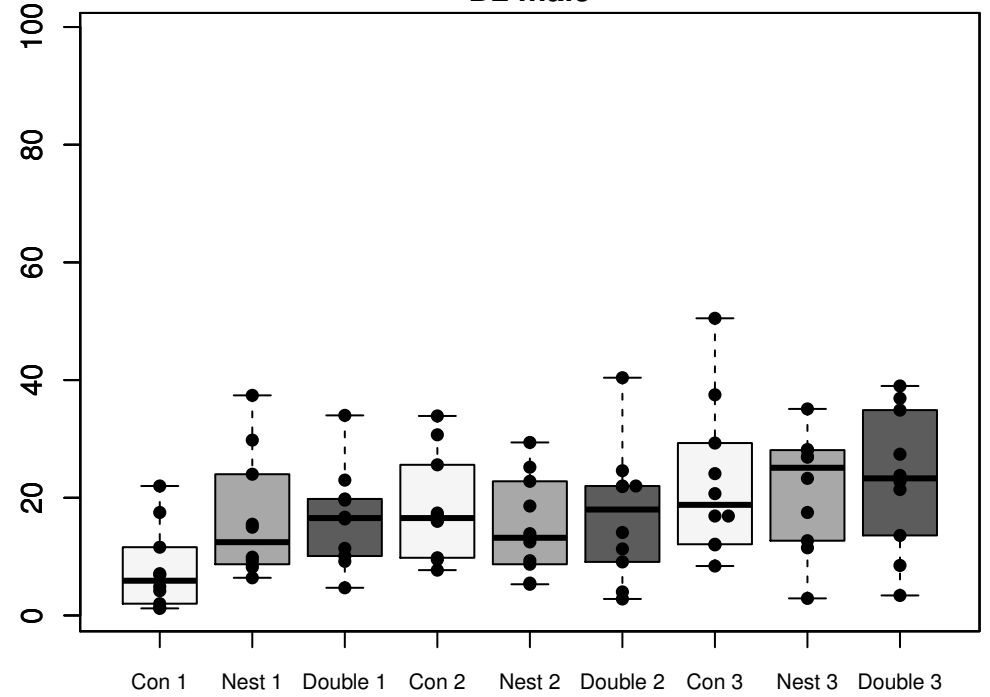

**B6 female**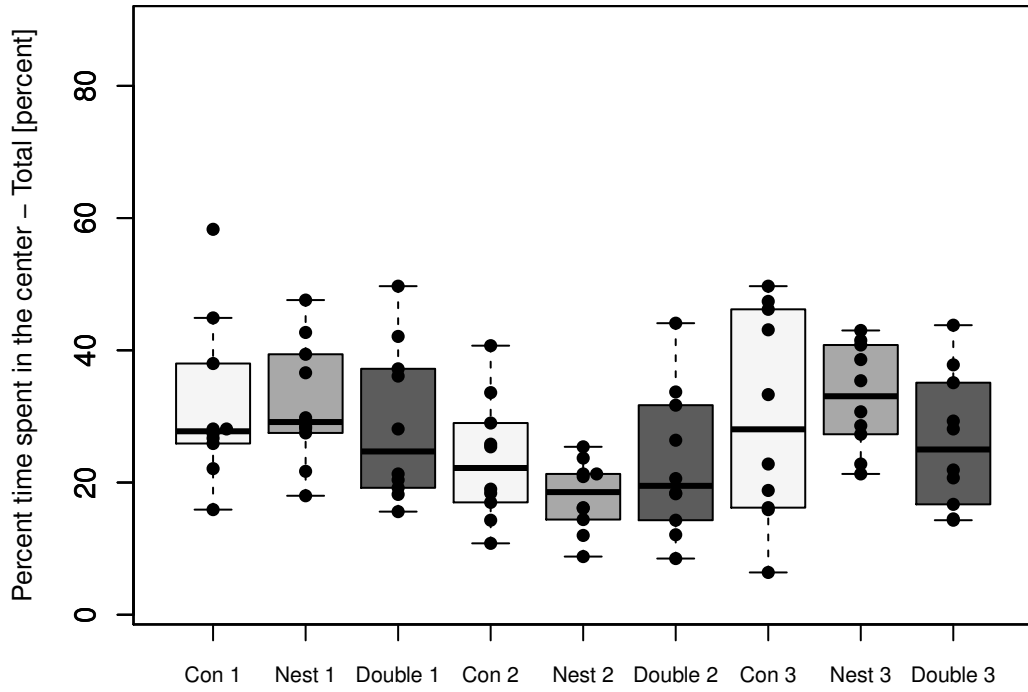**D2 female**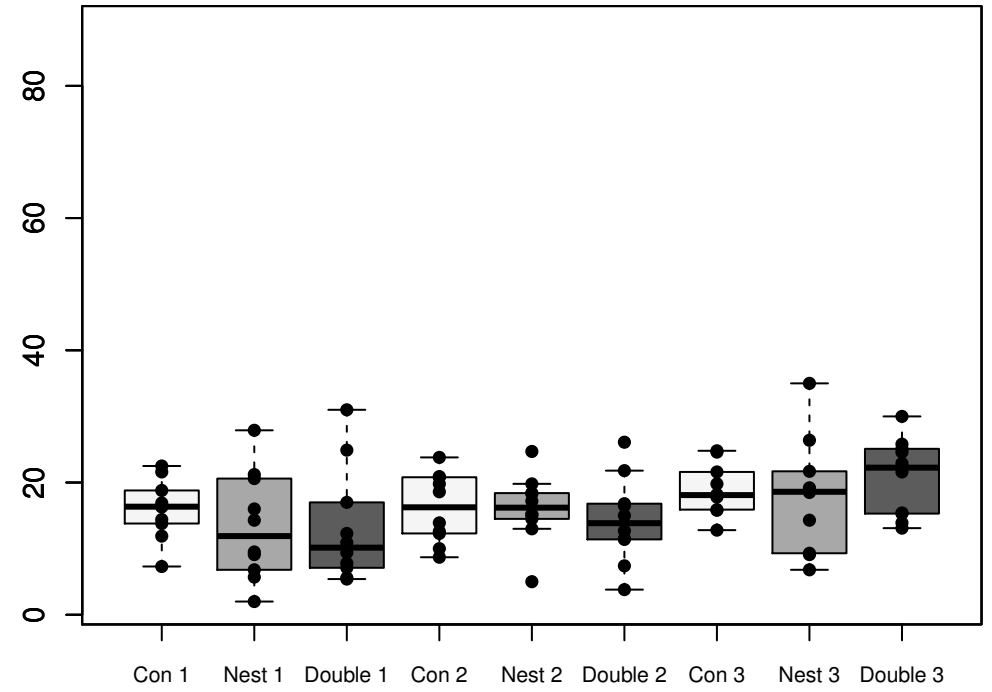**B6 male**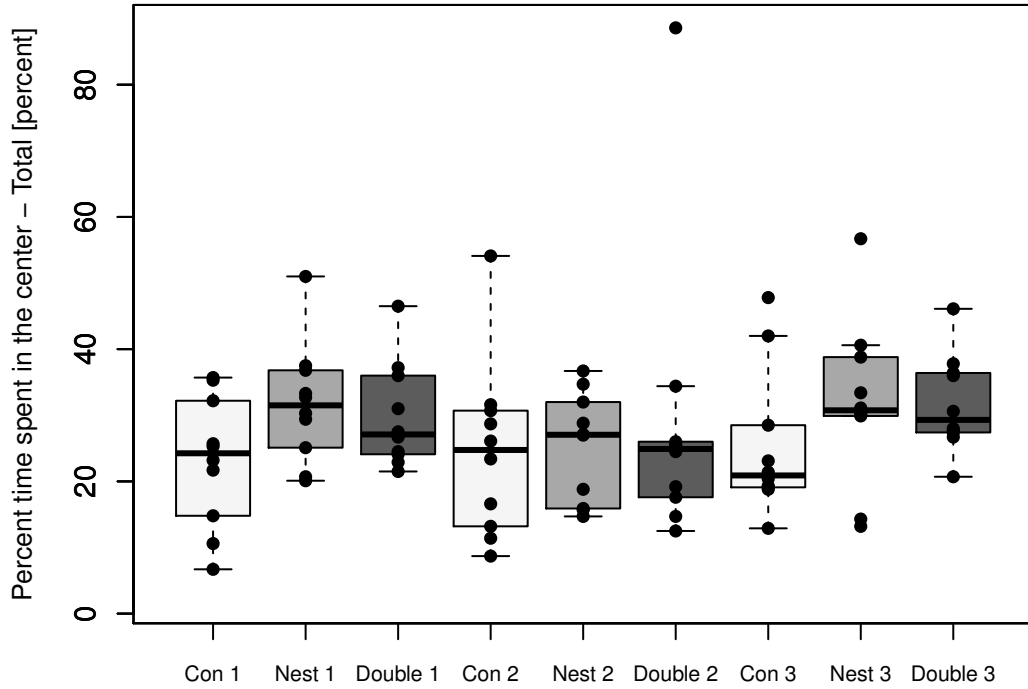**D2 male**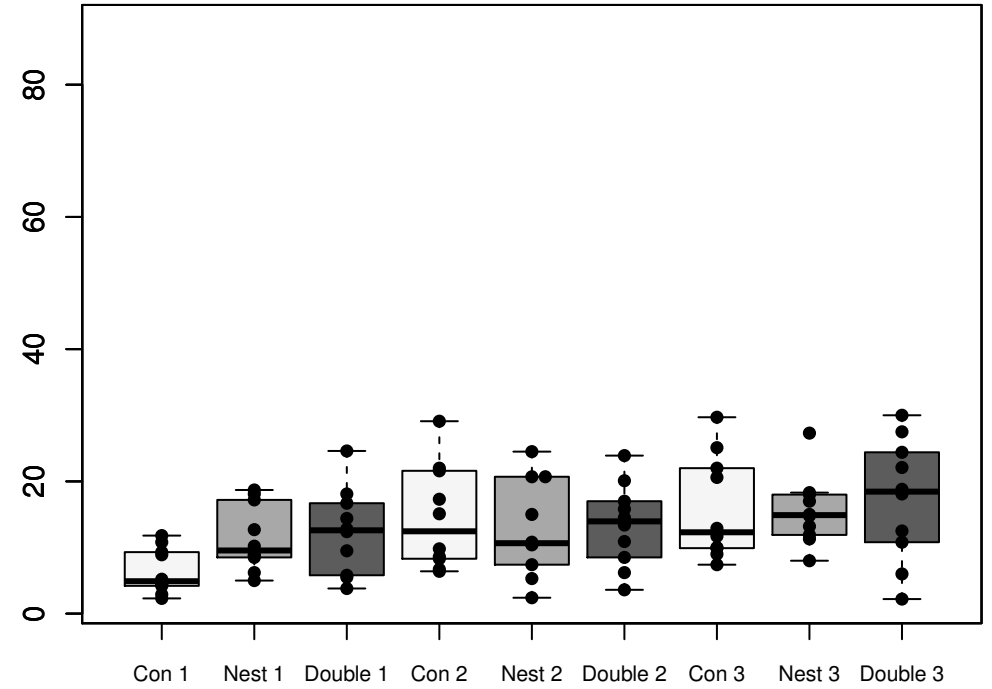

**B6 female**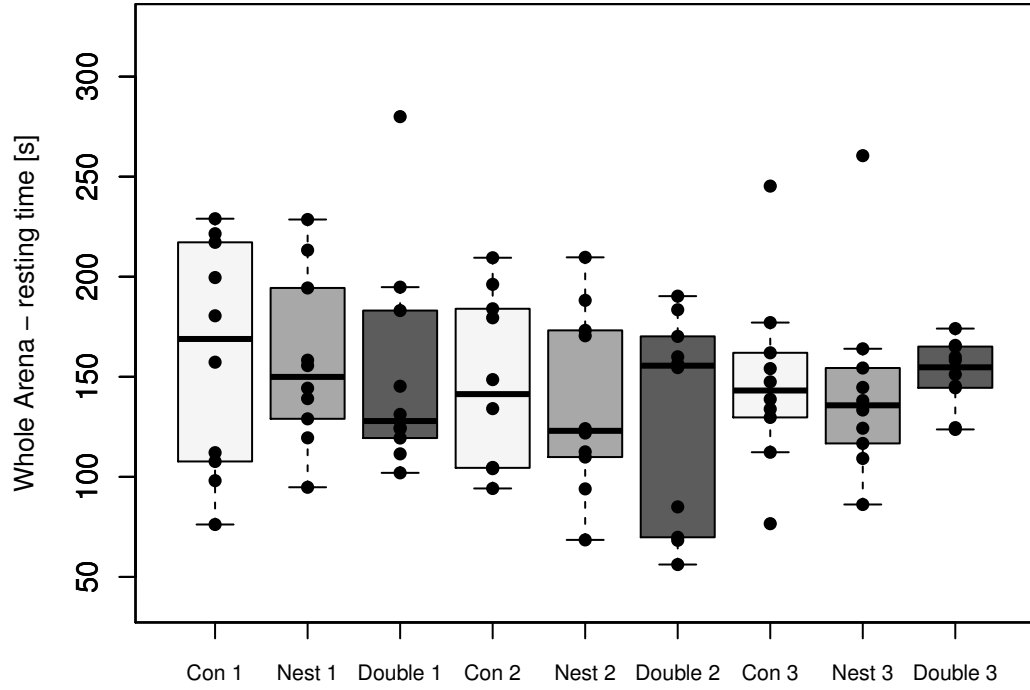**D2 female**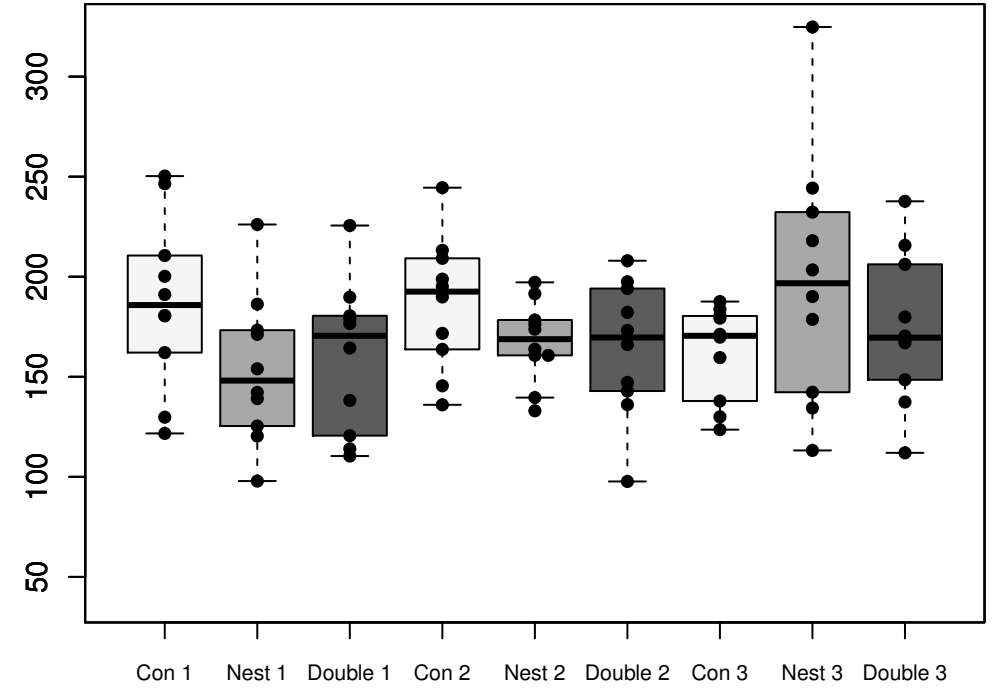**B6 male**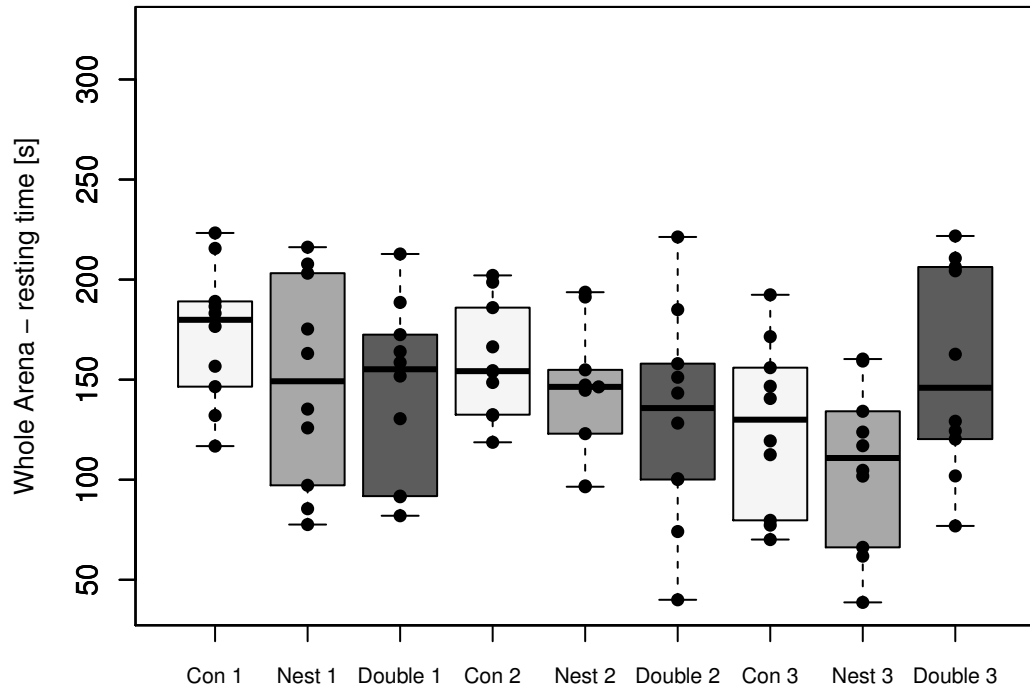**D2 male**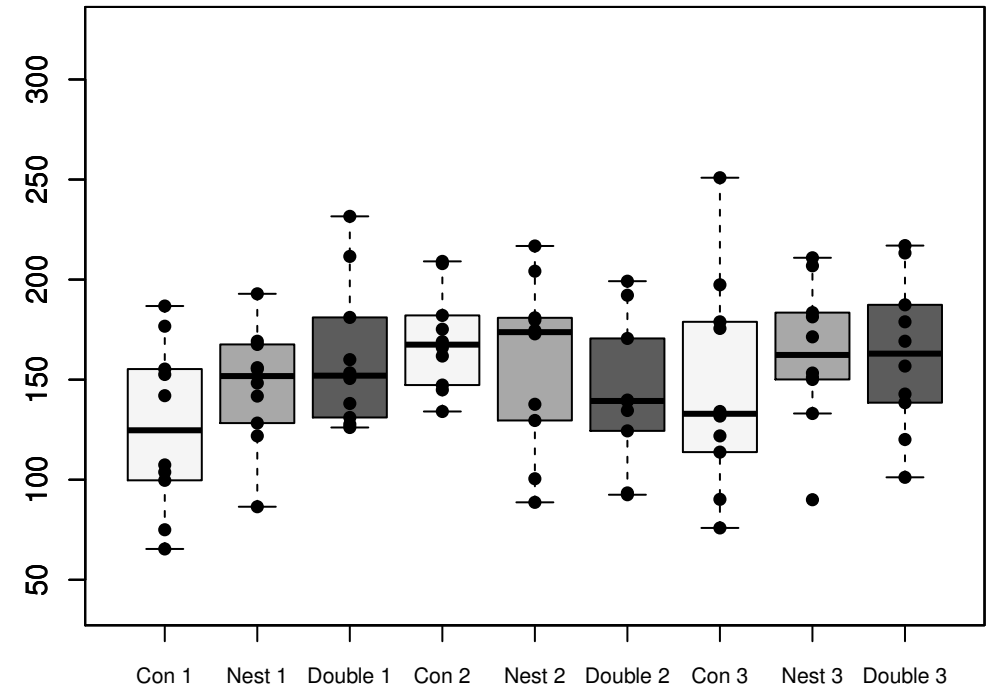

**B6 female**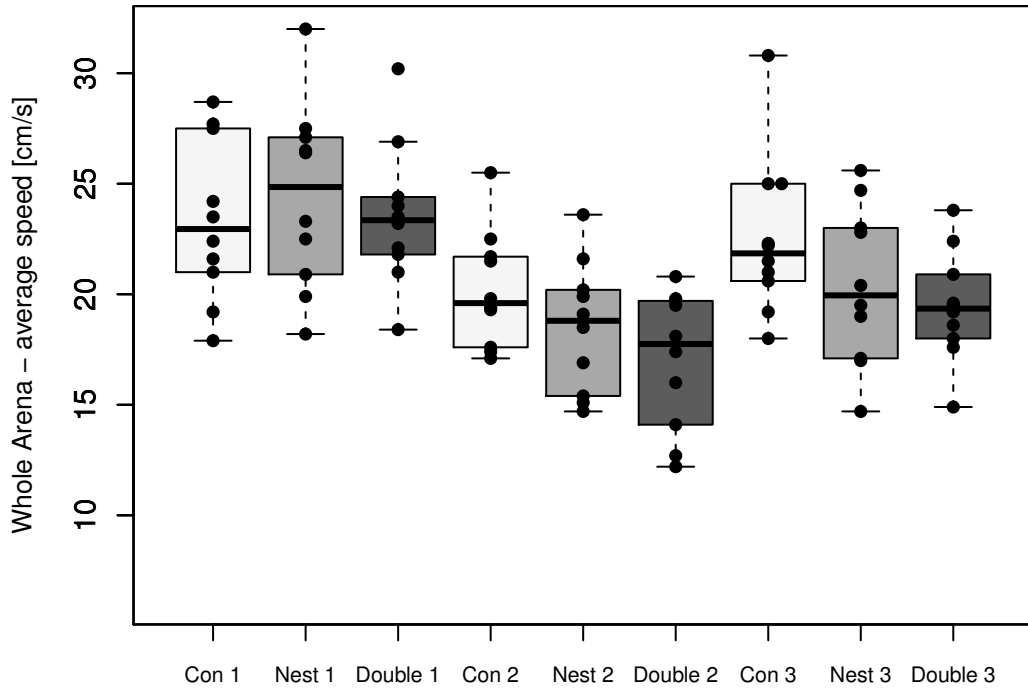**D2 female**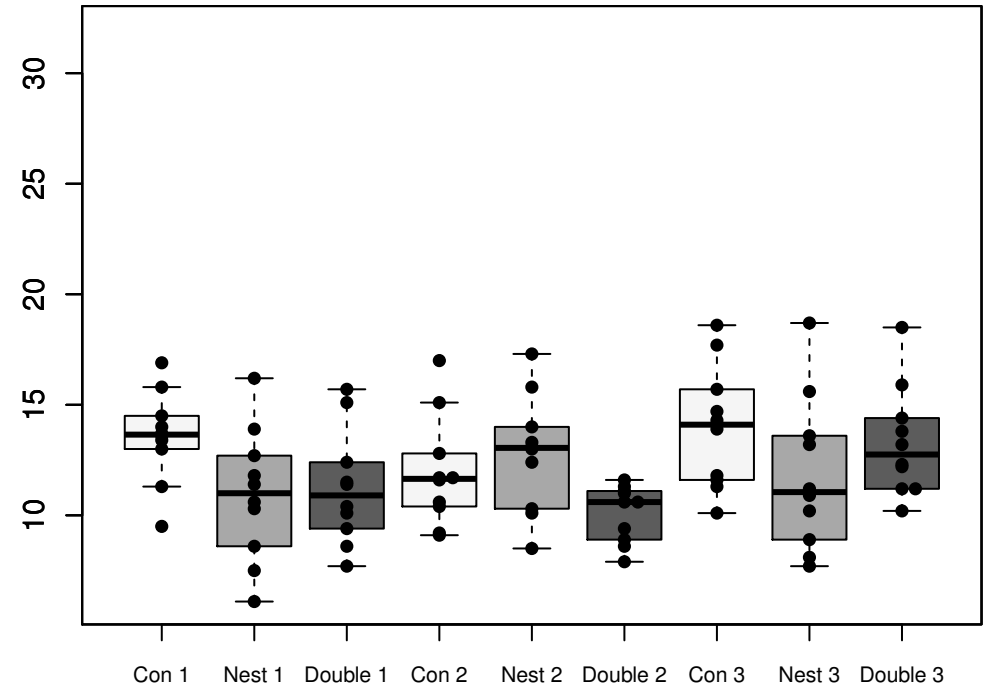**B6 male**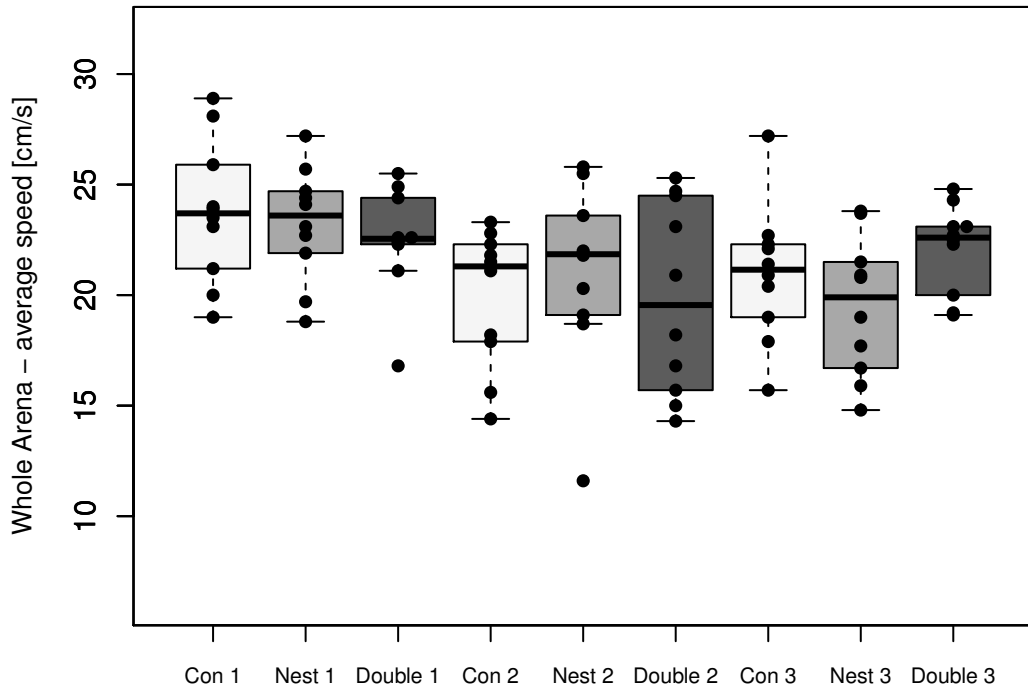**D2 male**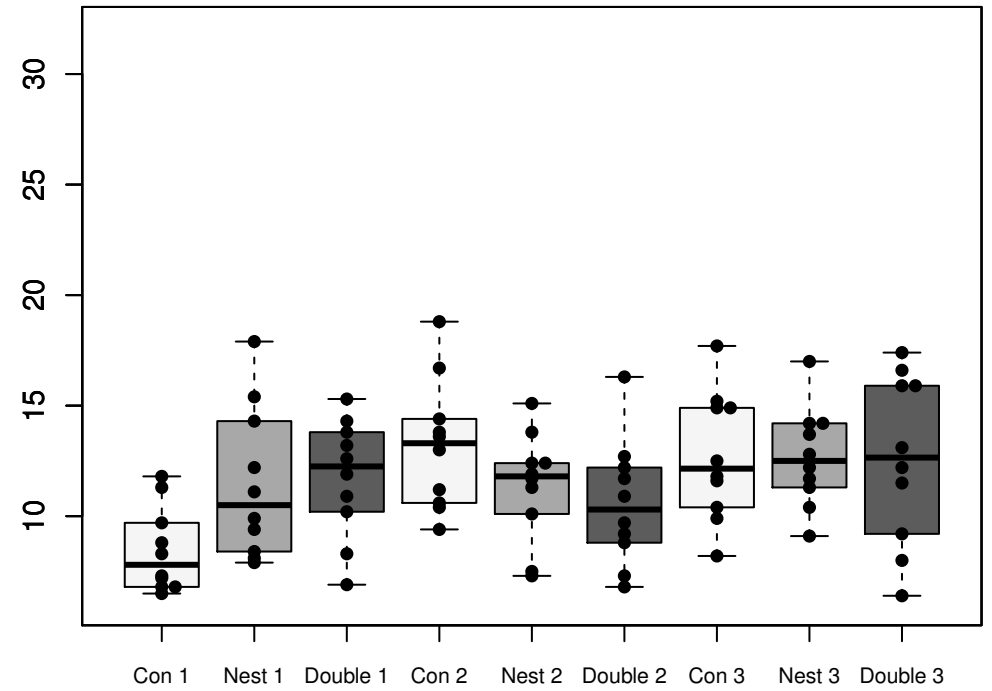

**B6 female**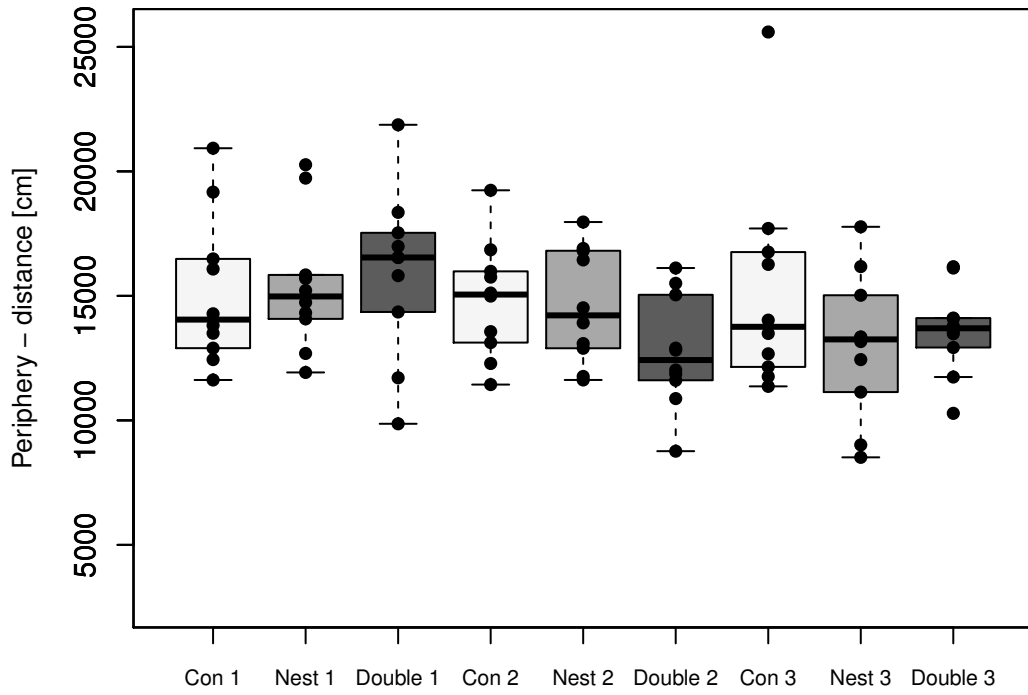**D2 female**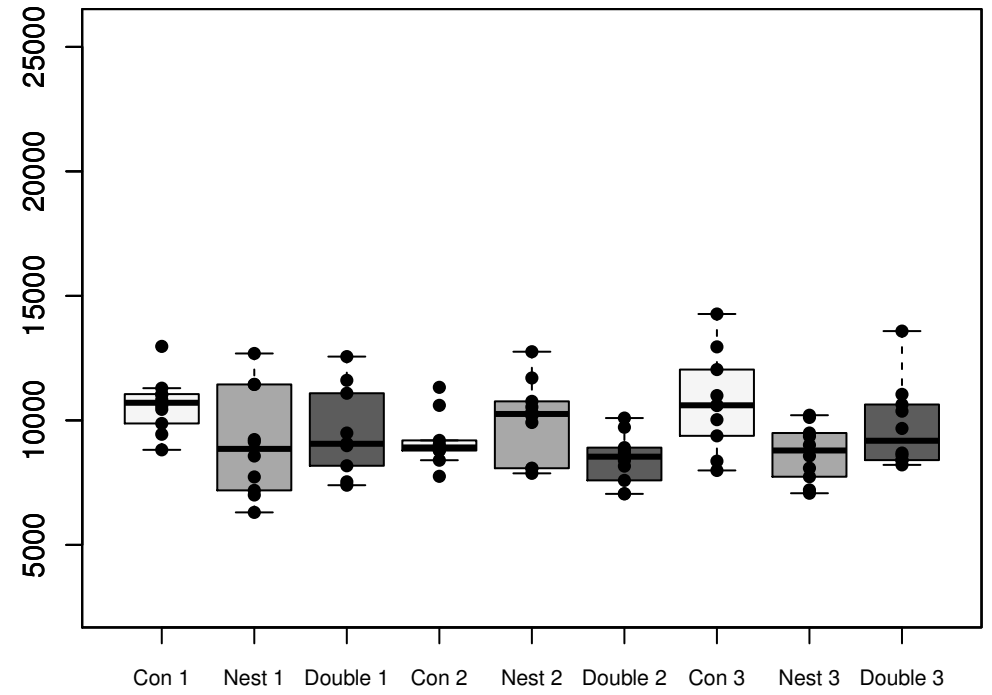**B6 male**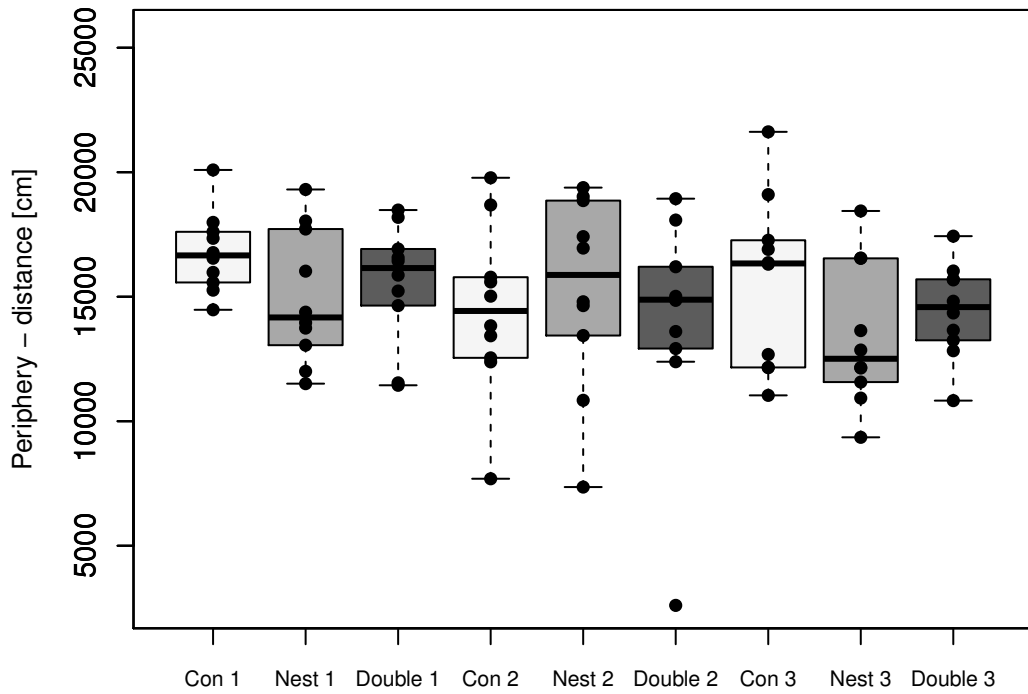**D2 male**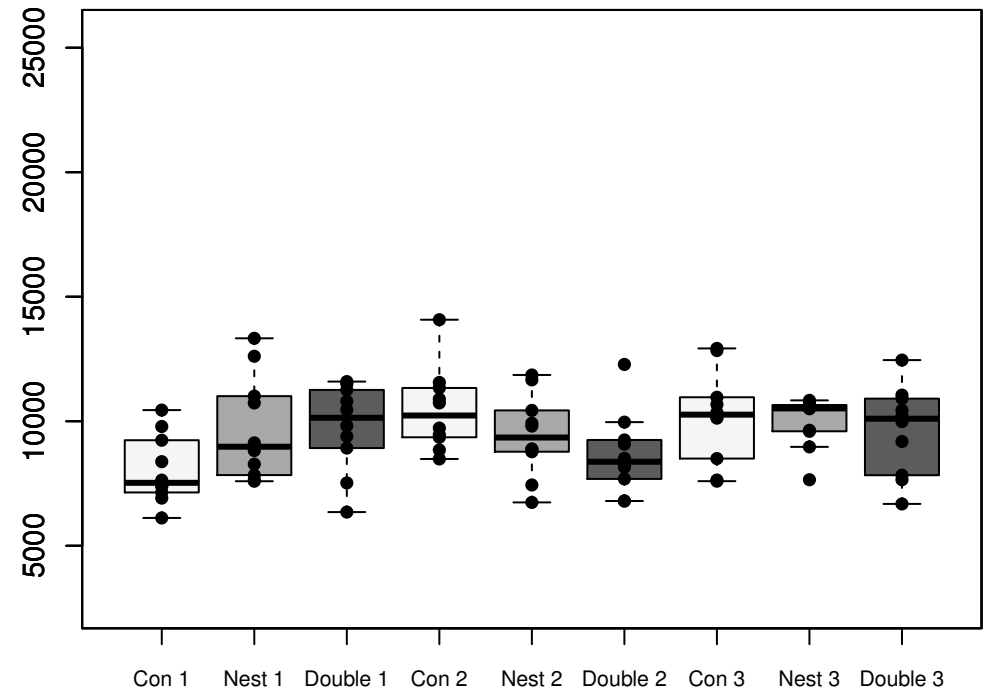

**B6 female**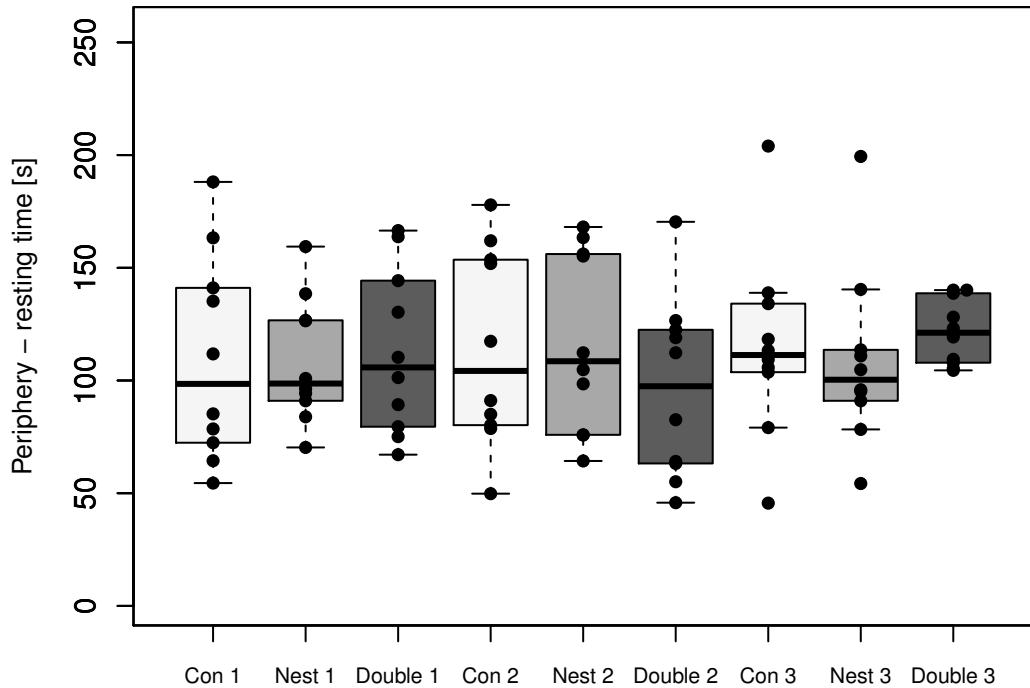**D2 female**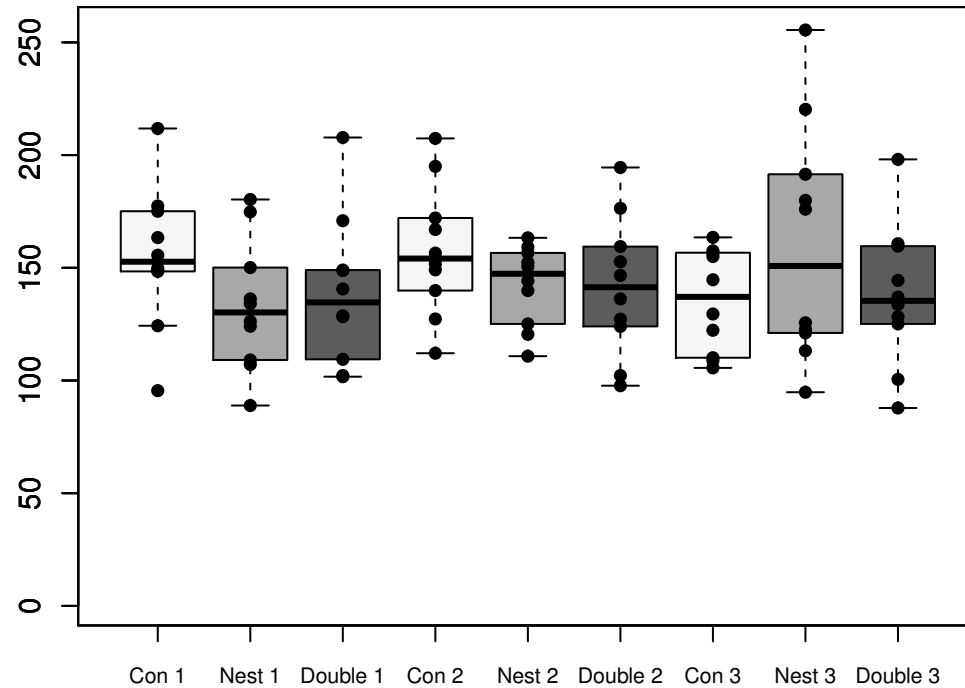**B6 male**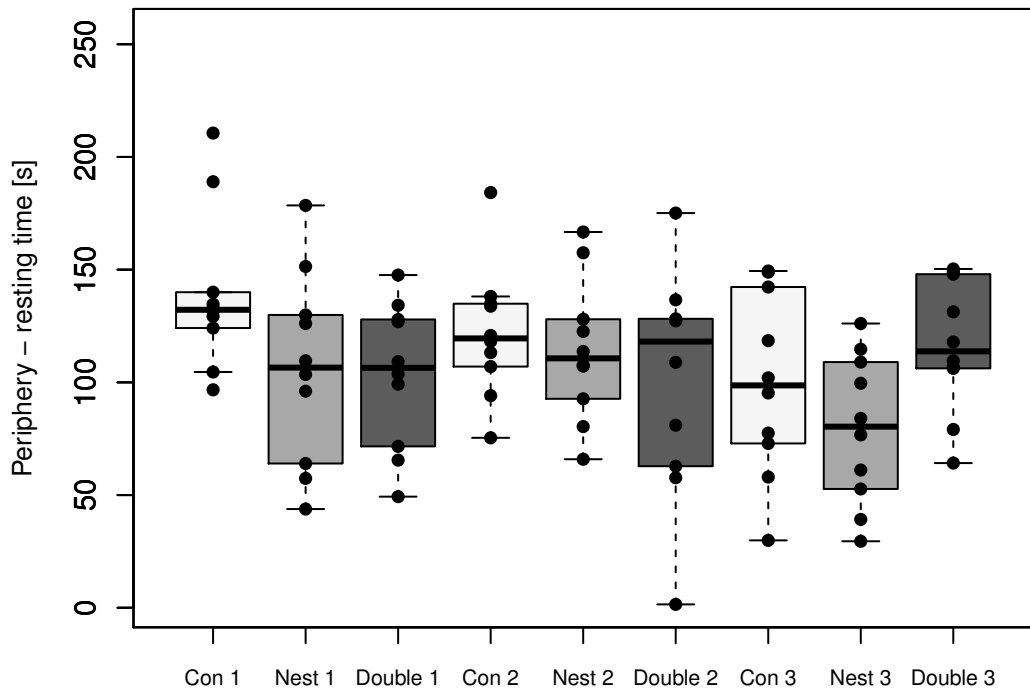**D2 male**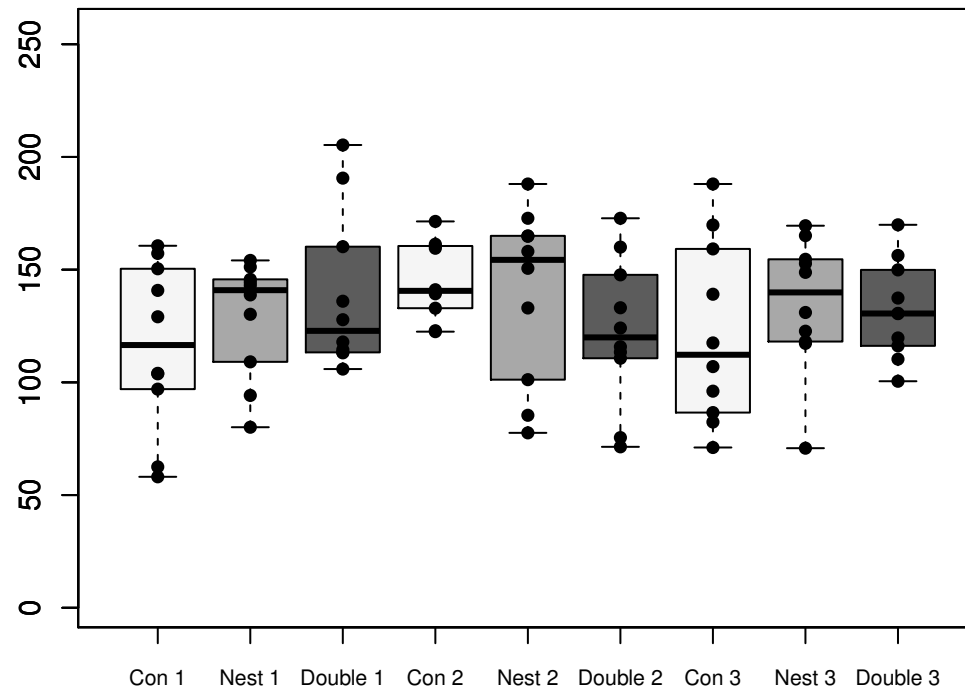



**B6 female**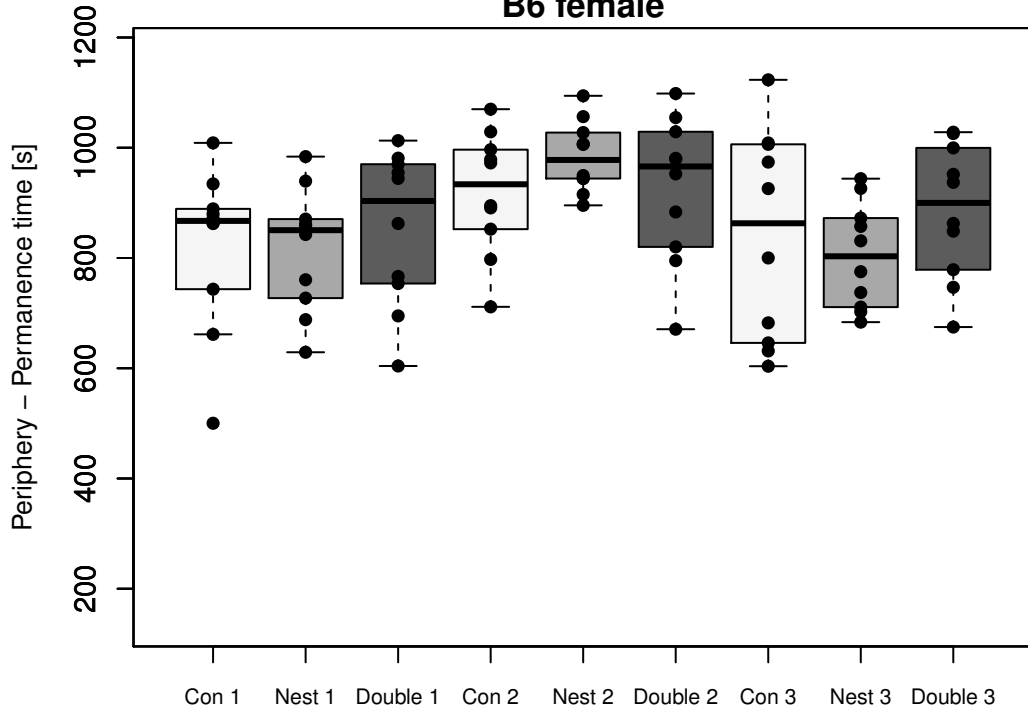**D2 female**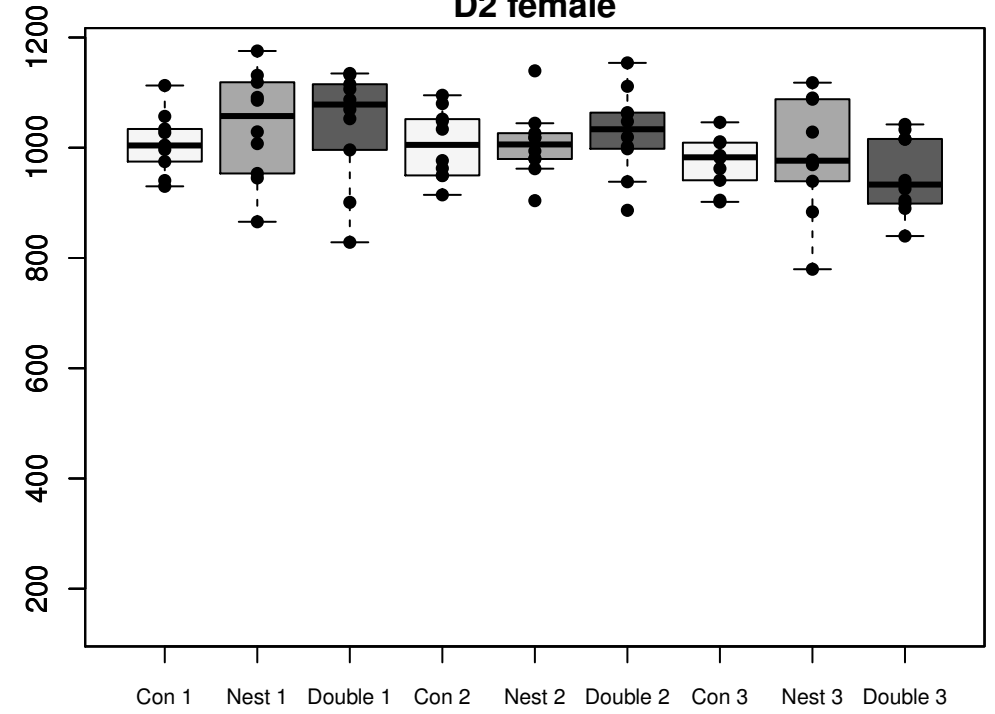**B6 male**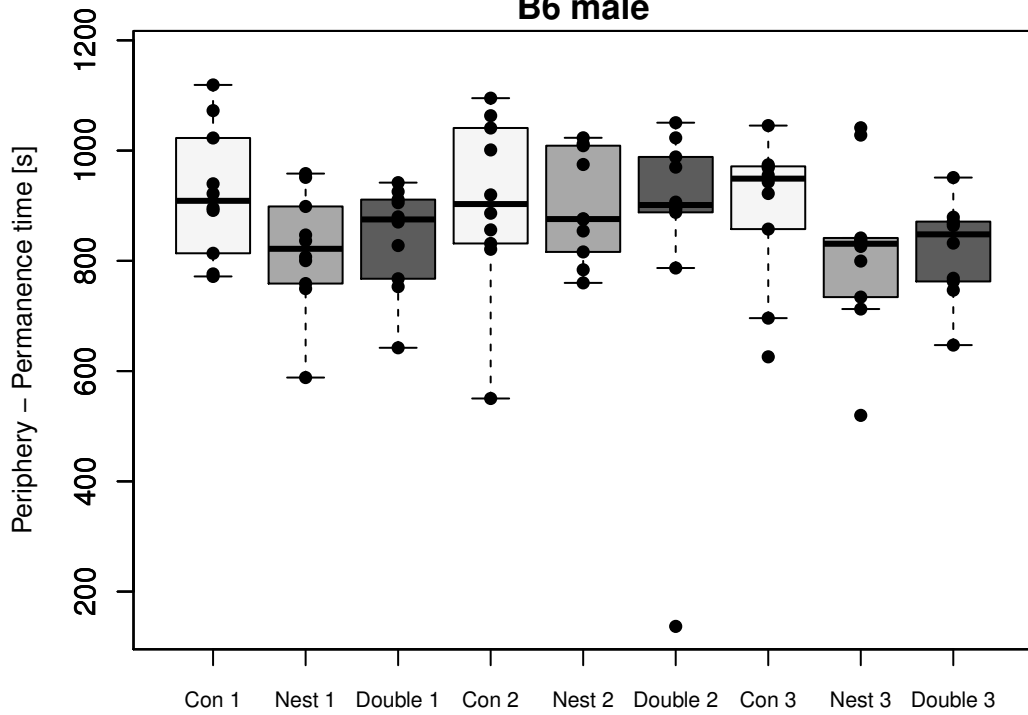**D2 male**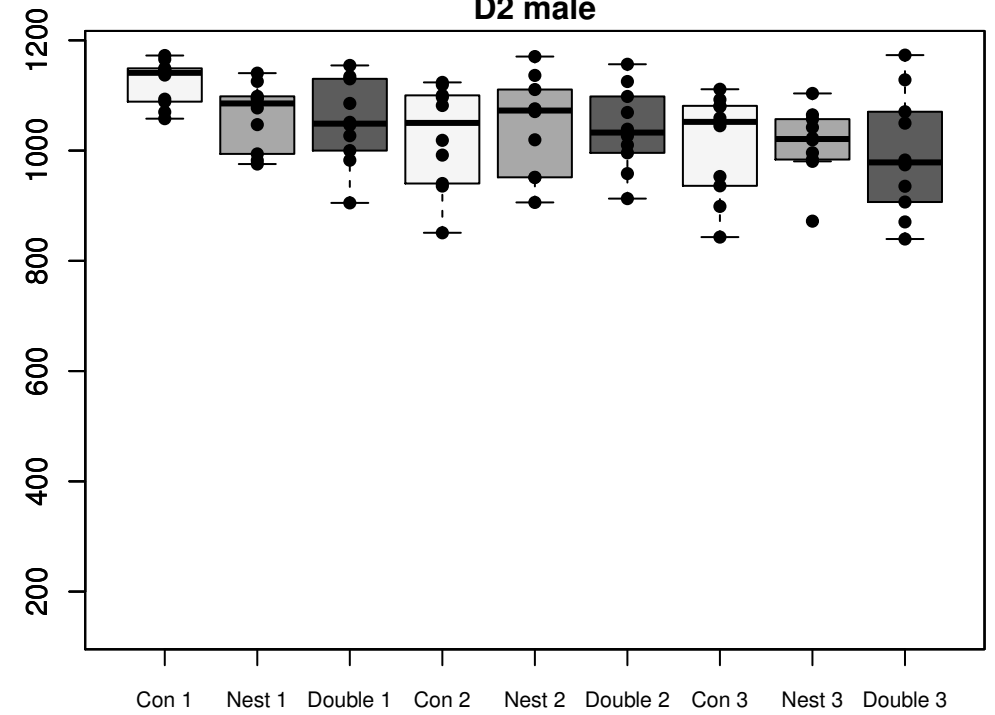

**B6 female**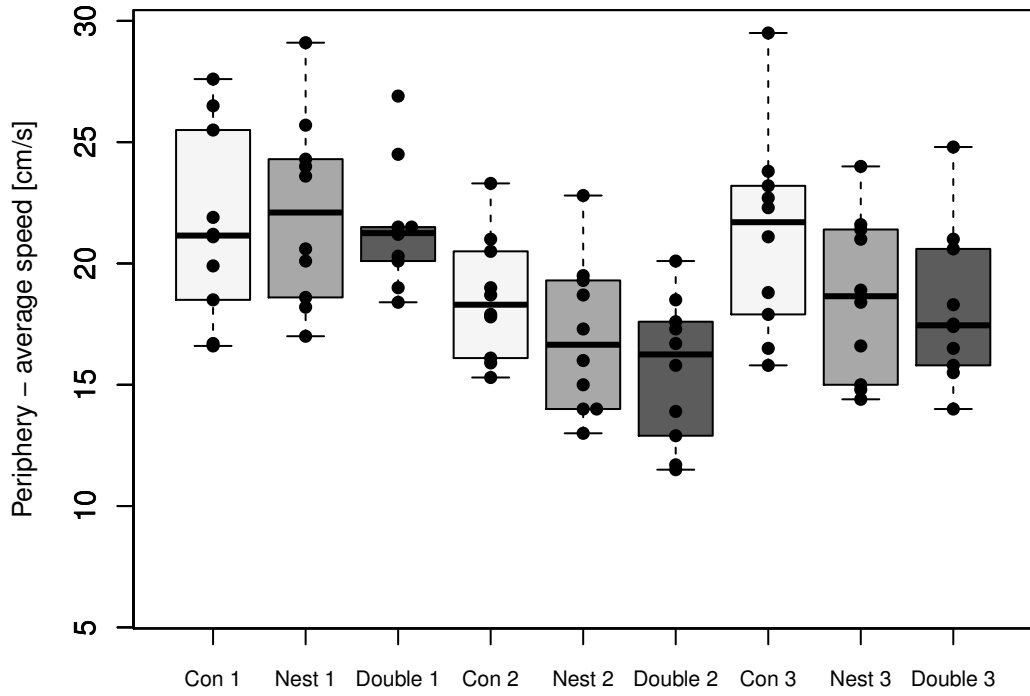**D2 female**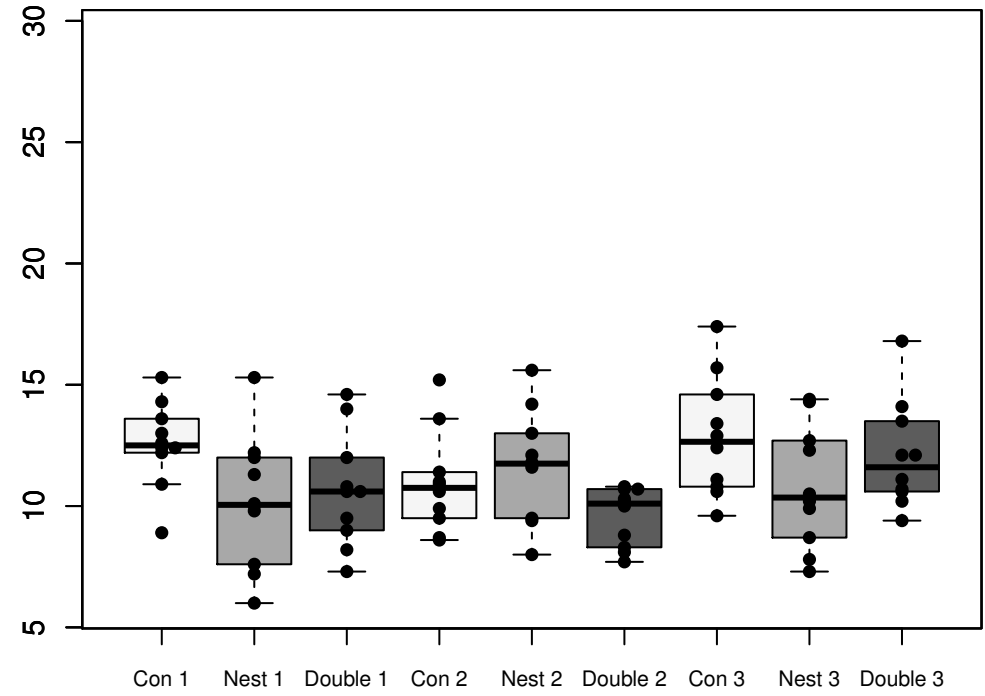**B6 male**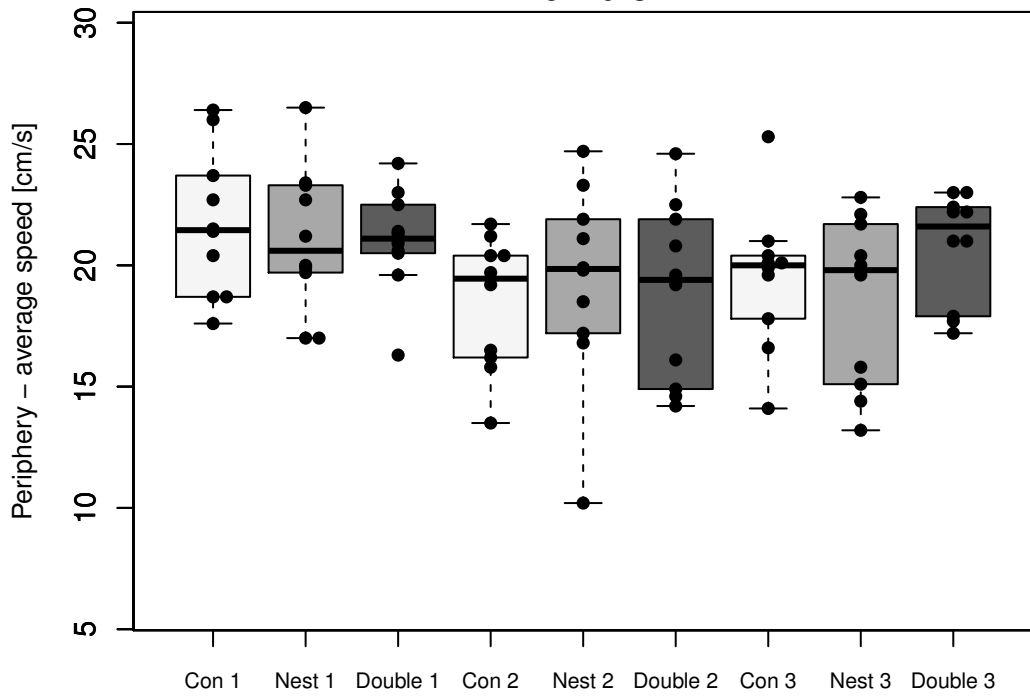**D2 male**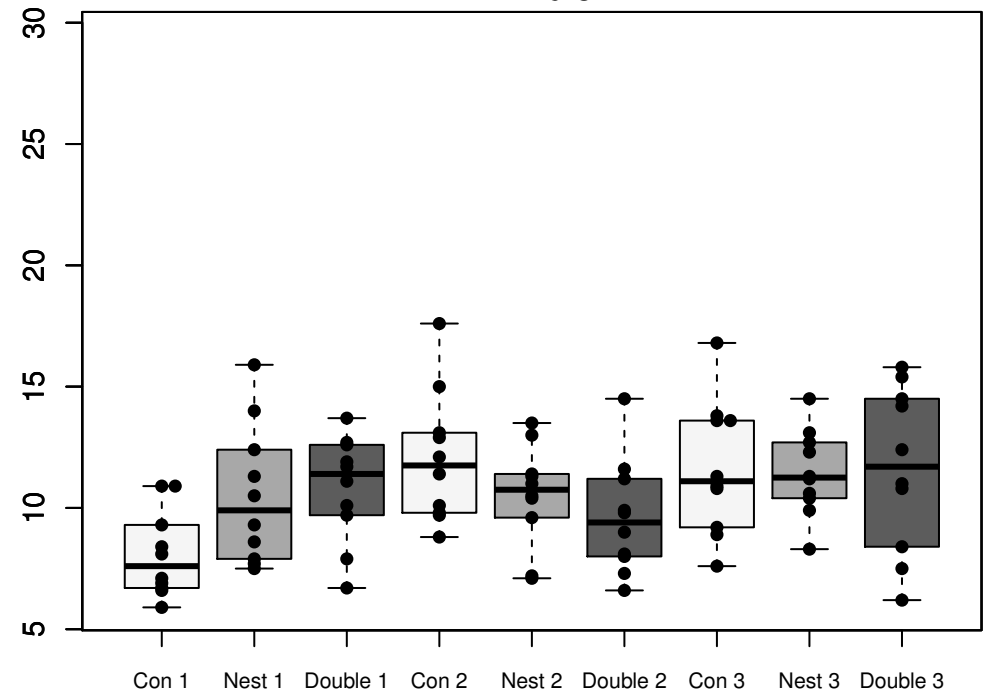

**B6 female**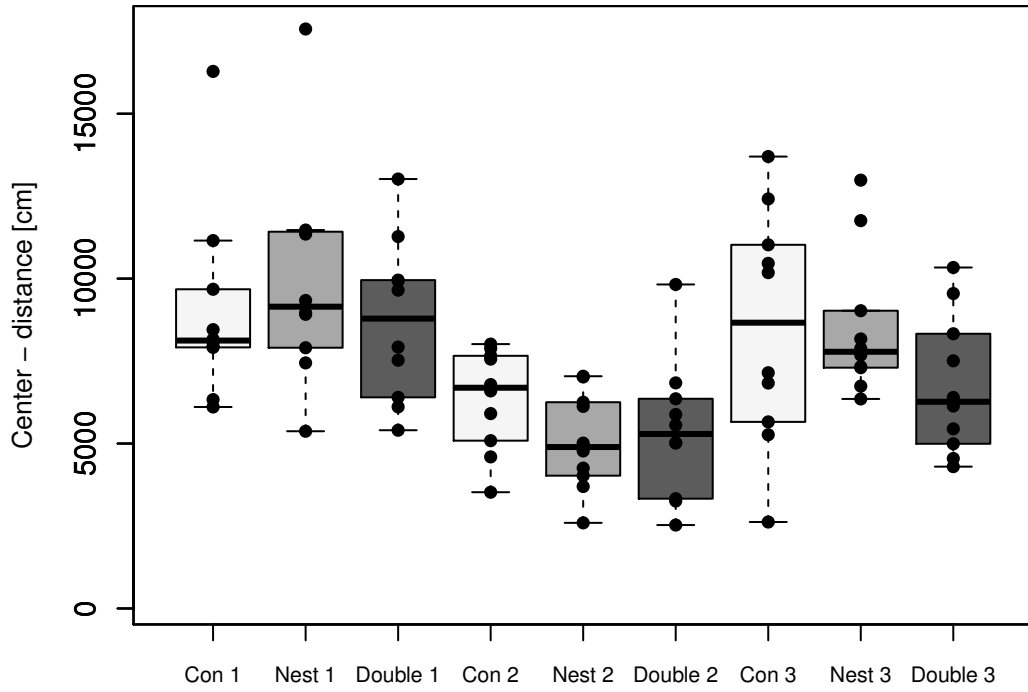**D2 female**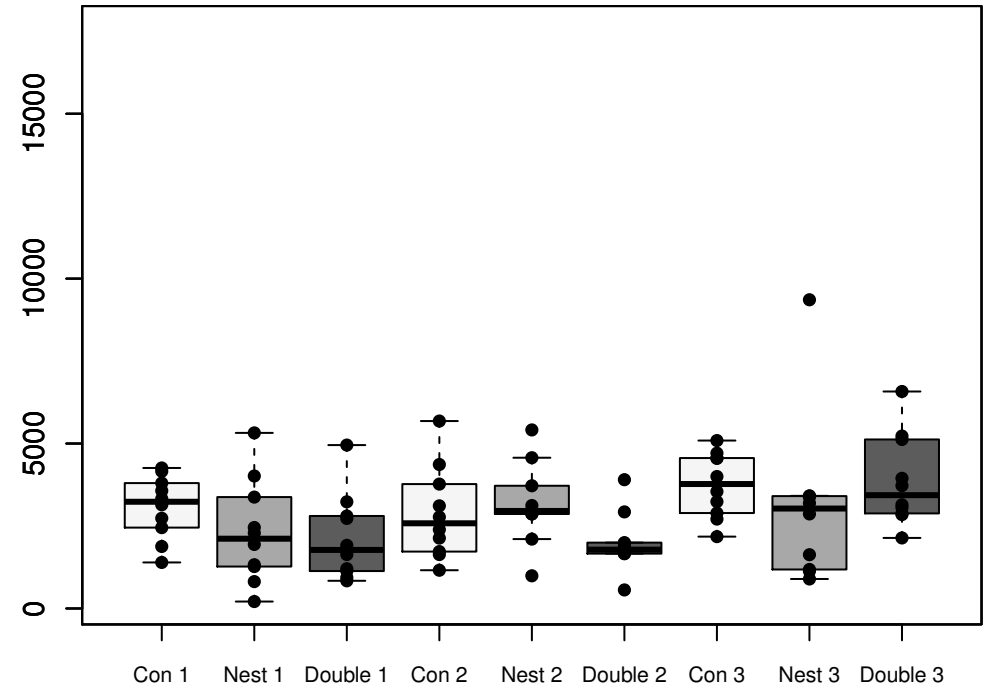**B6 male**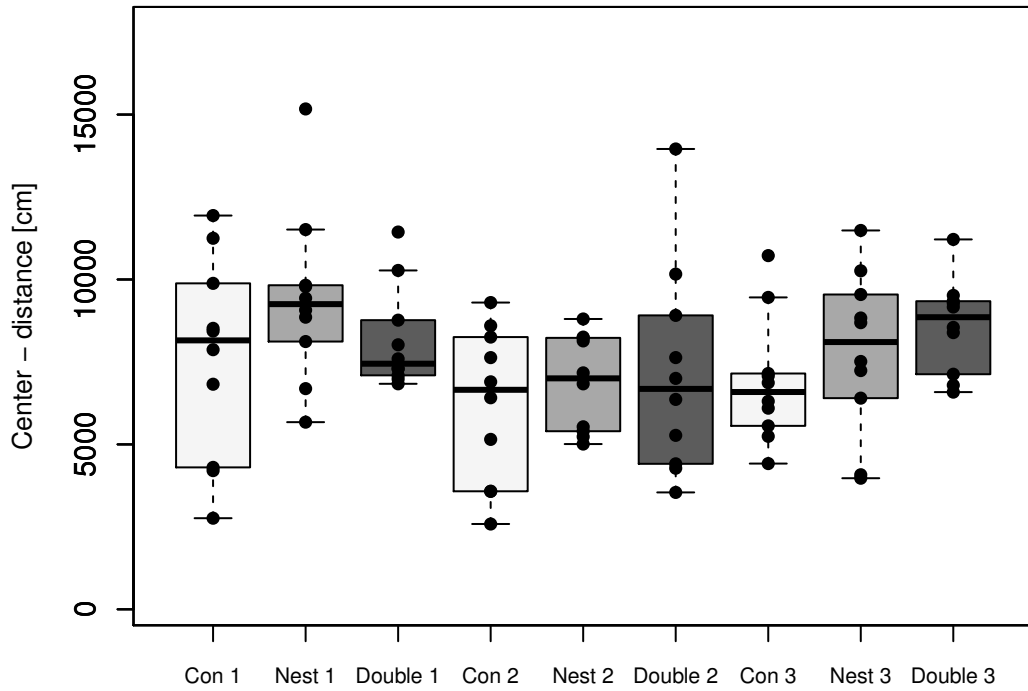**D2 male**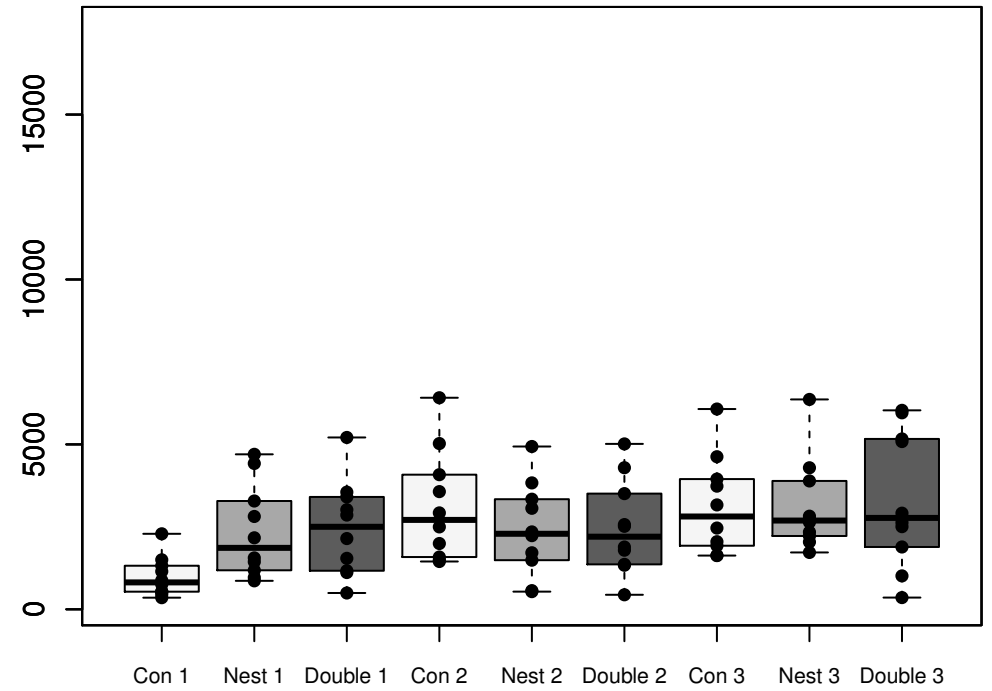

**B6 female**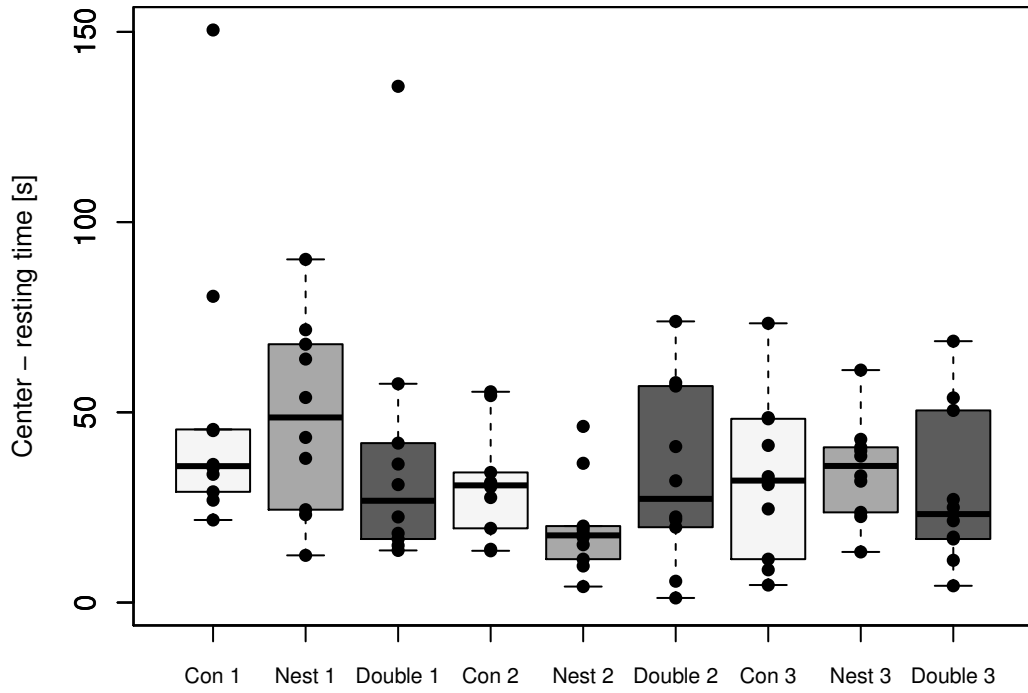**D2 female**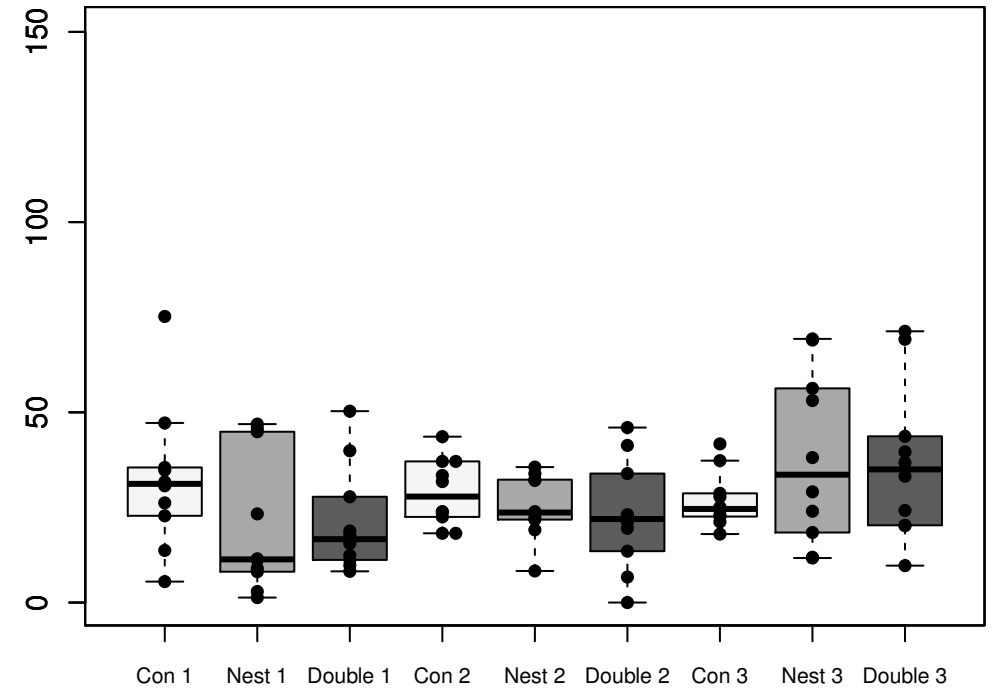**B6 male**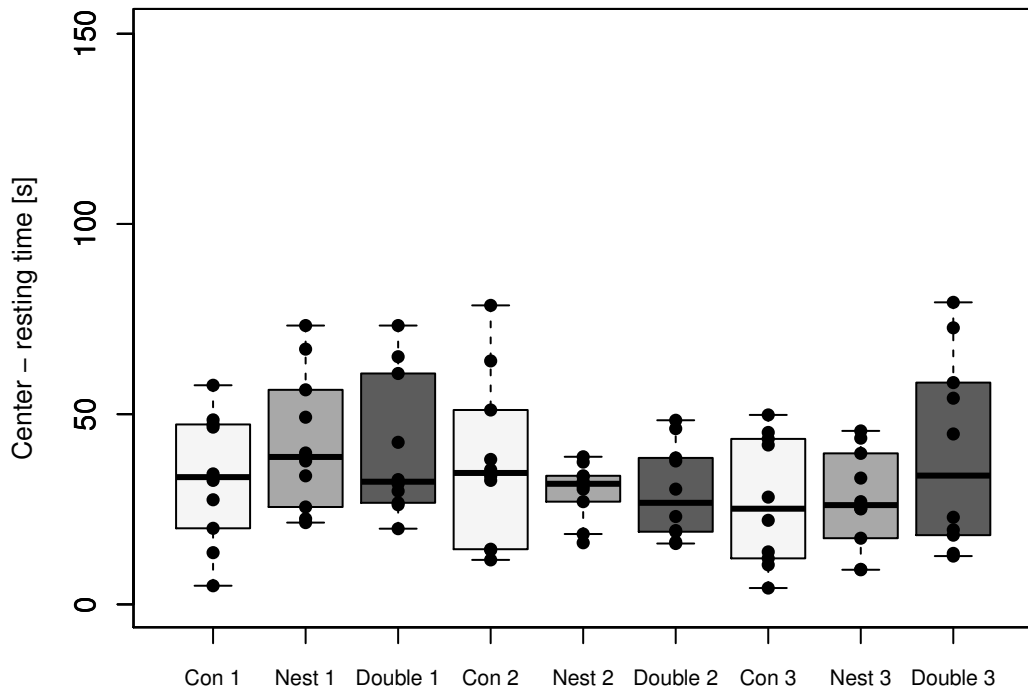**D2 male**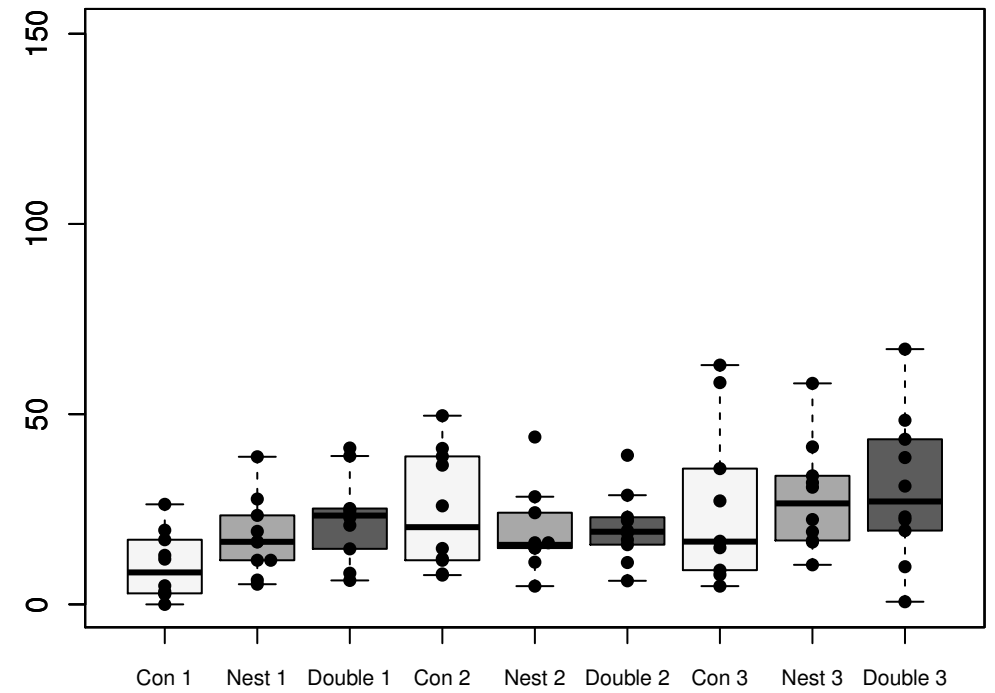

**B6 female**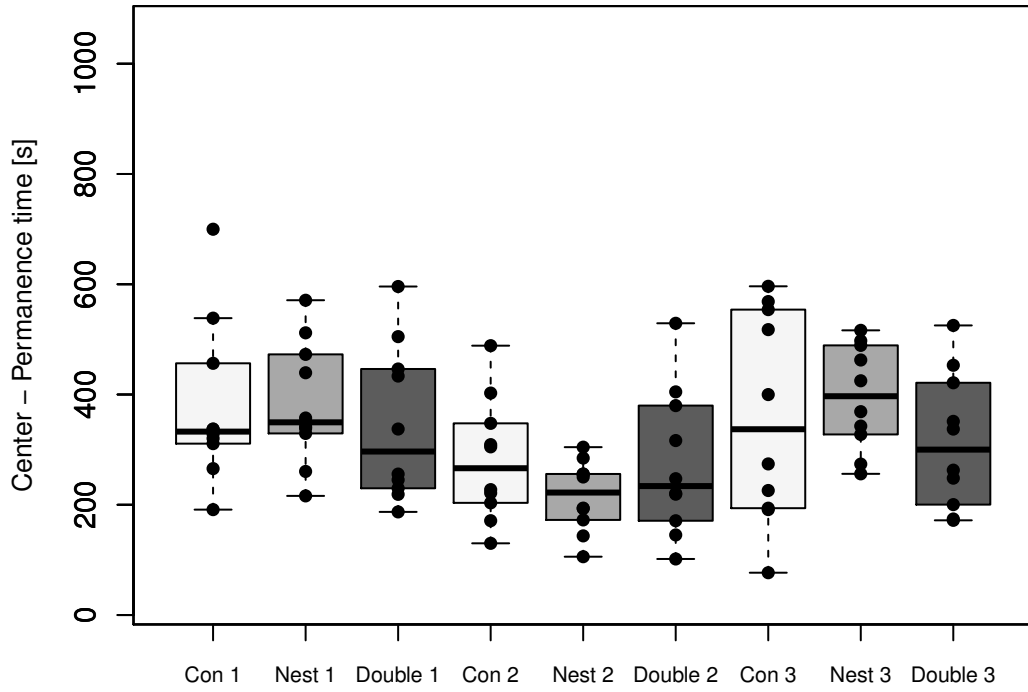**D2 female**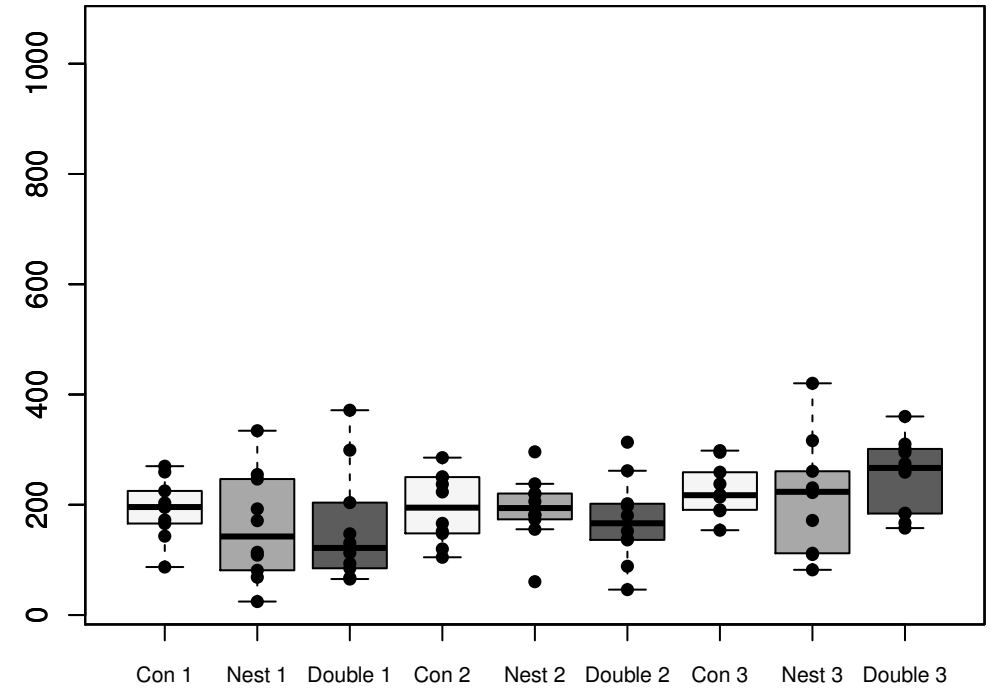**B6 male**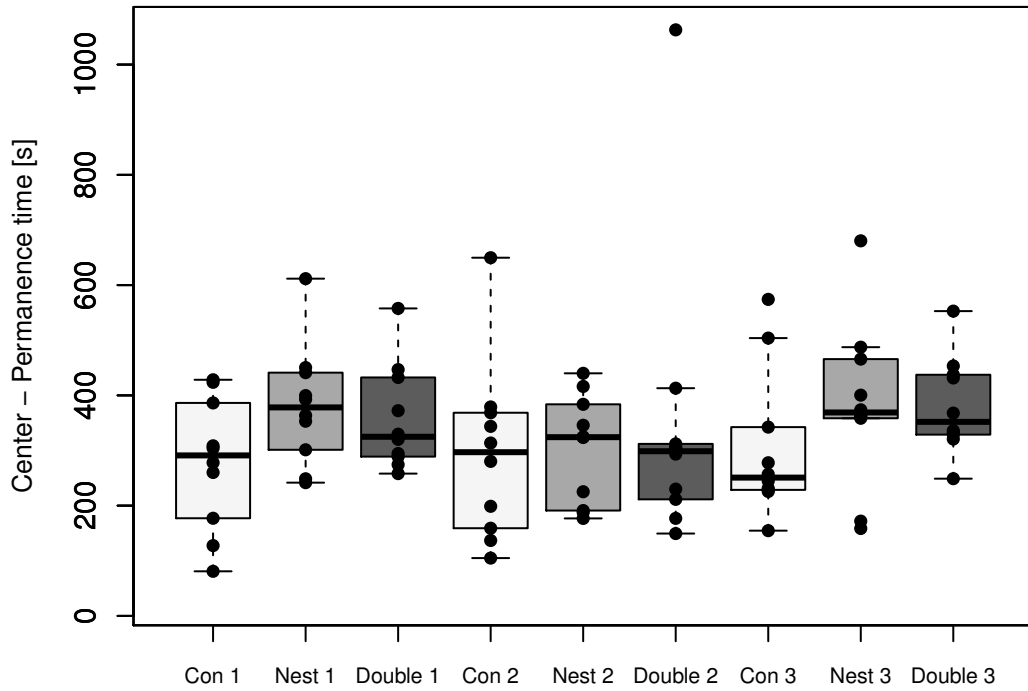**D2 male**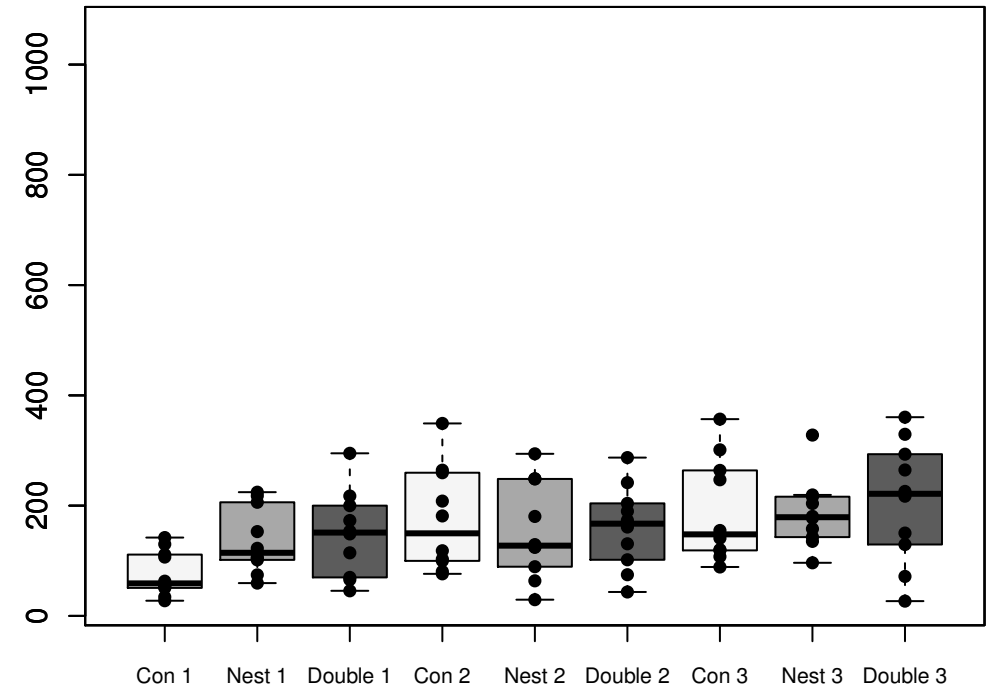

**B6 female**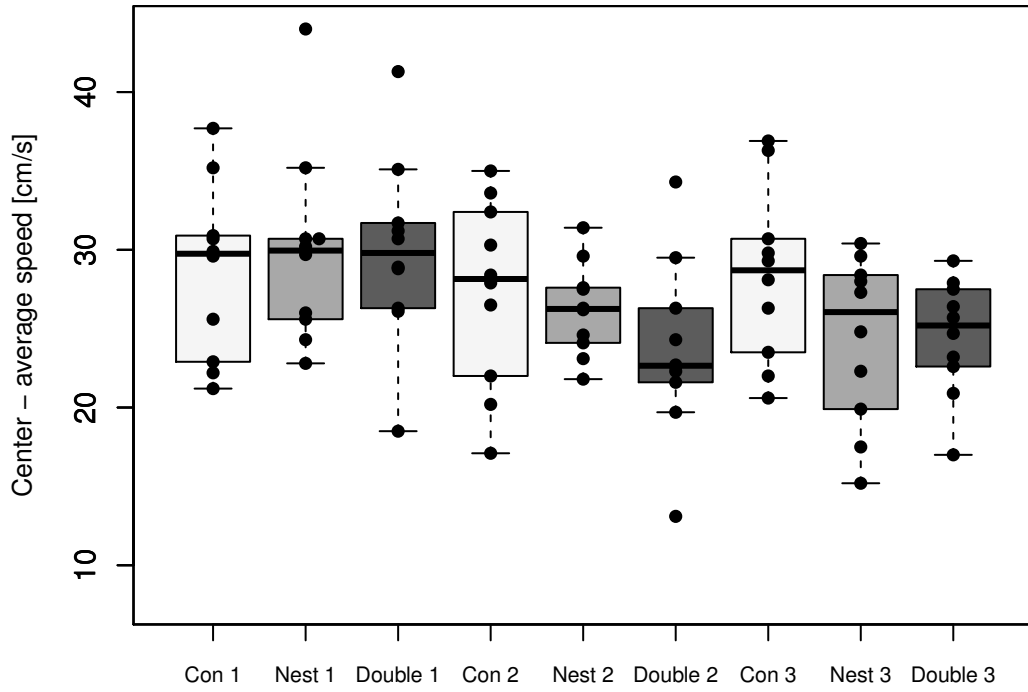**D2 female**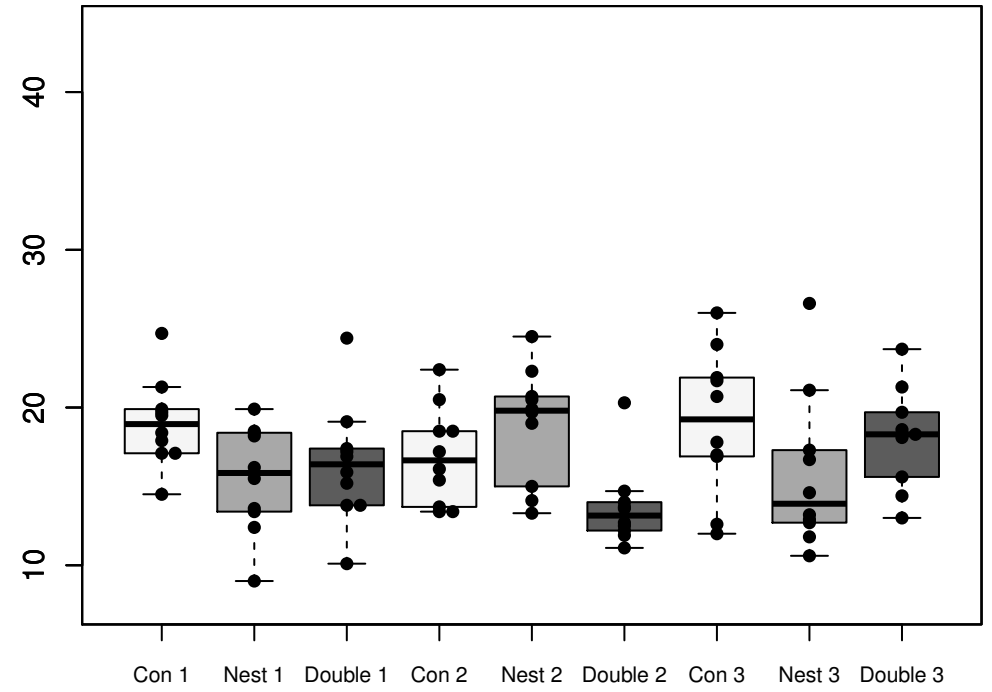**B6 male**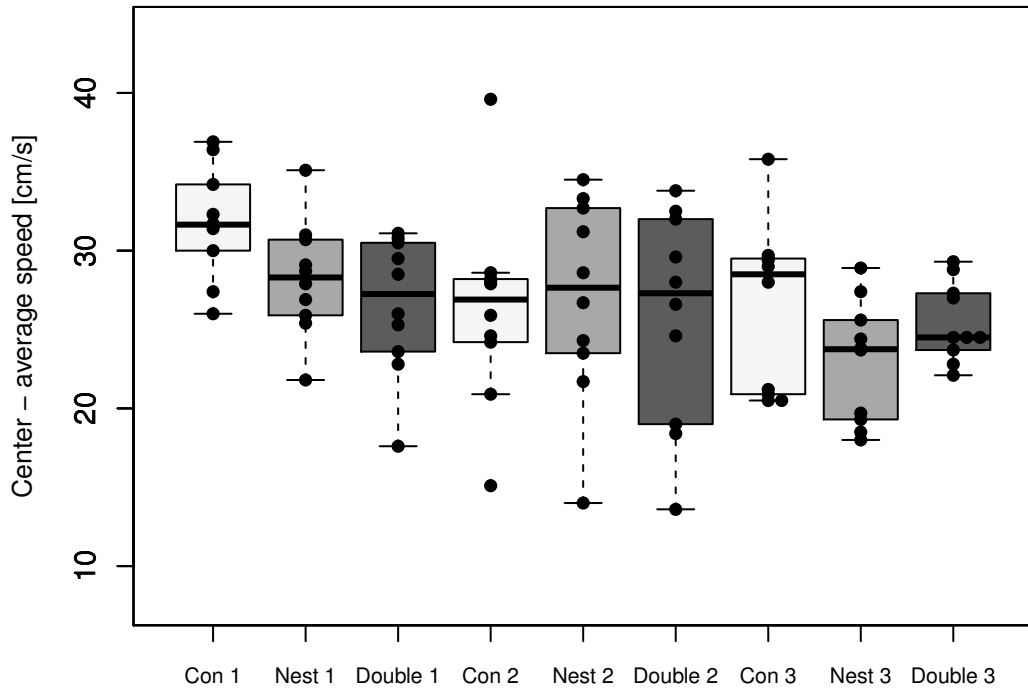**D2 male**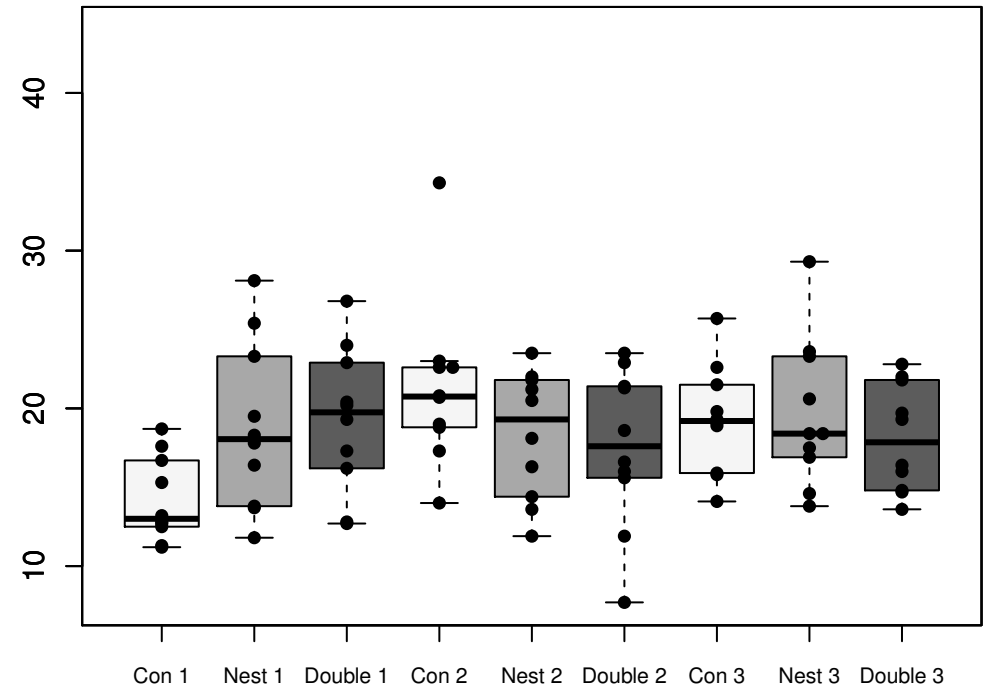

**B6 female**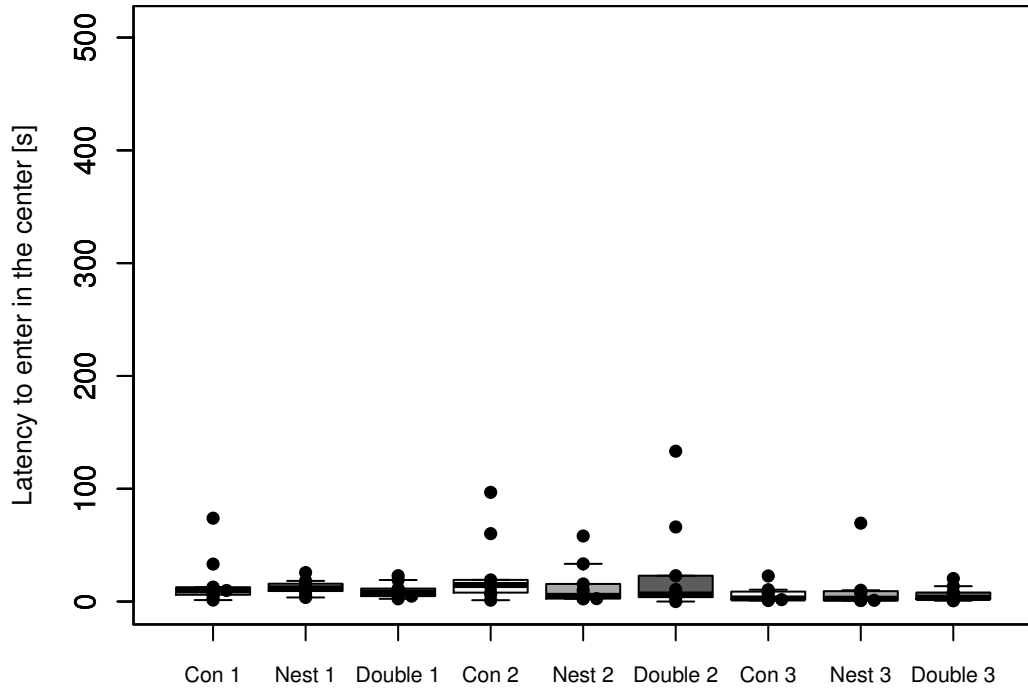**D2 female**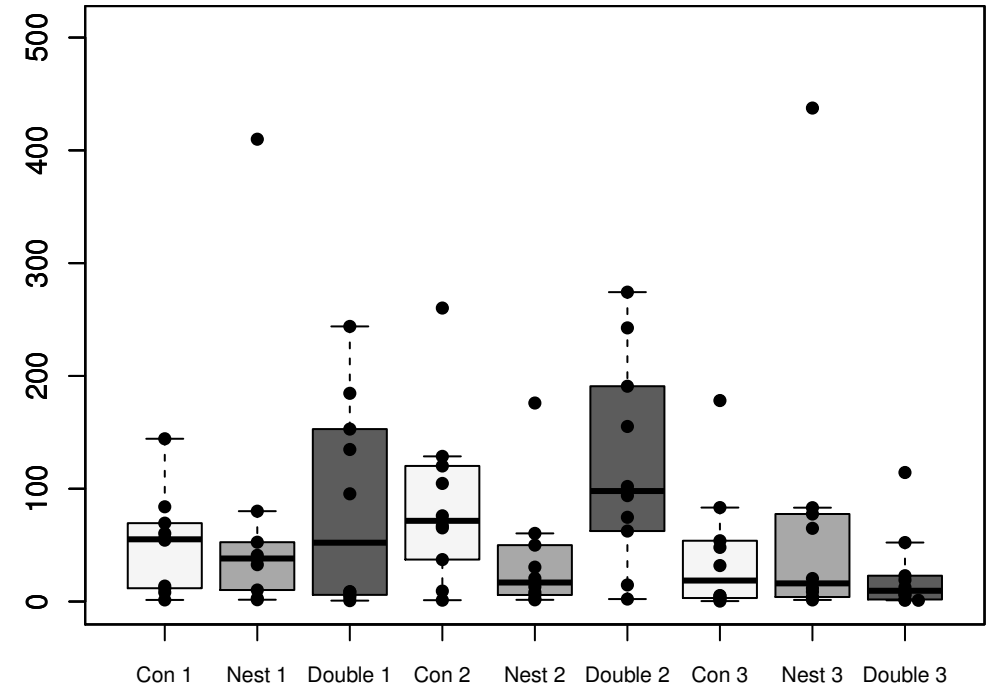**B6 male**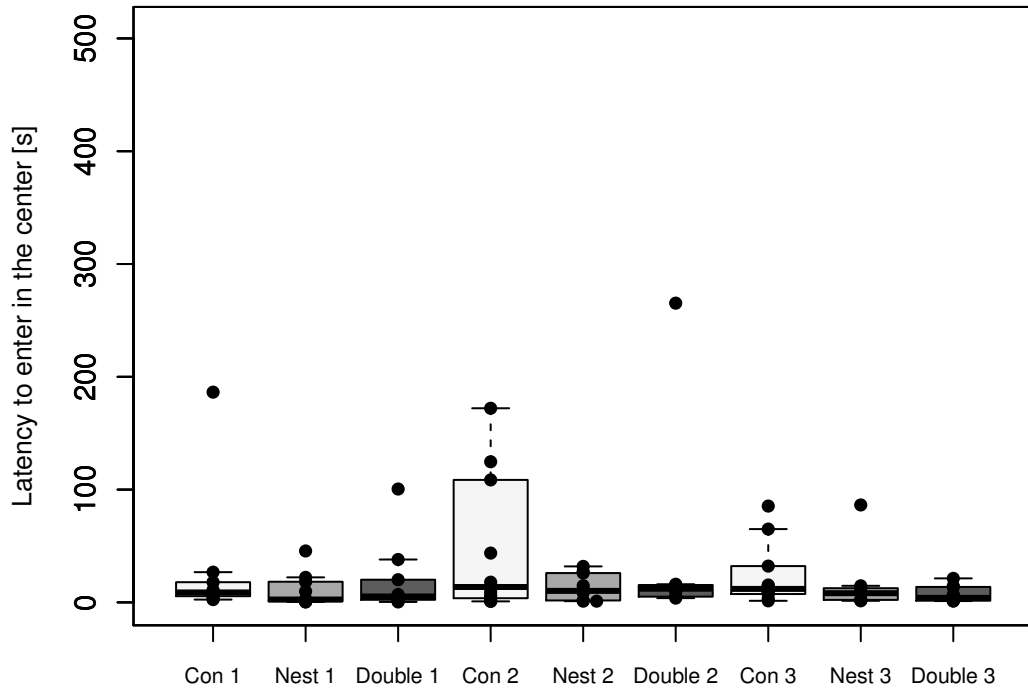**D2 male**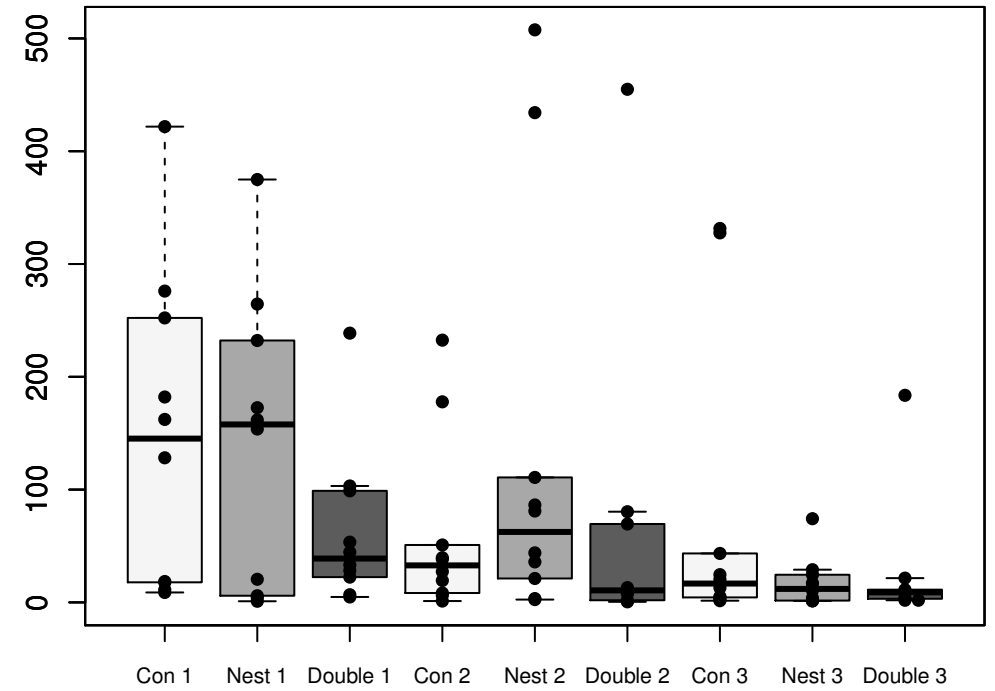

**B6 female**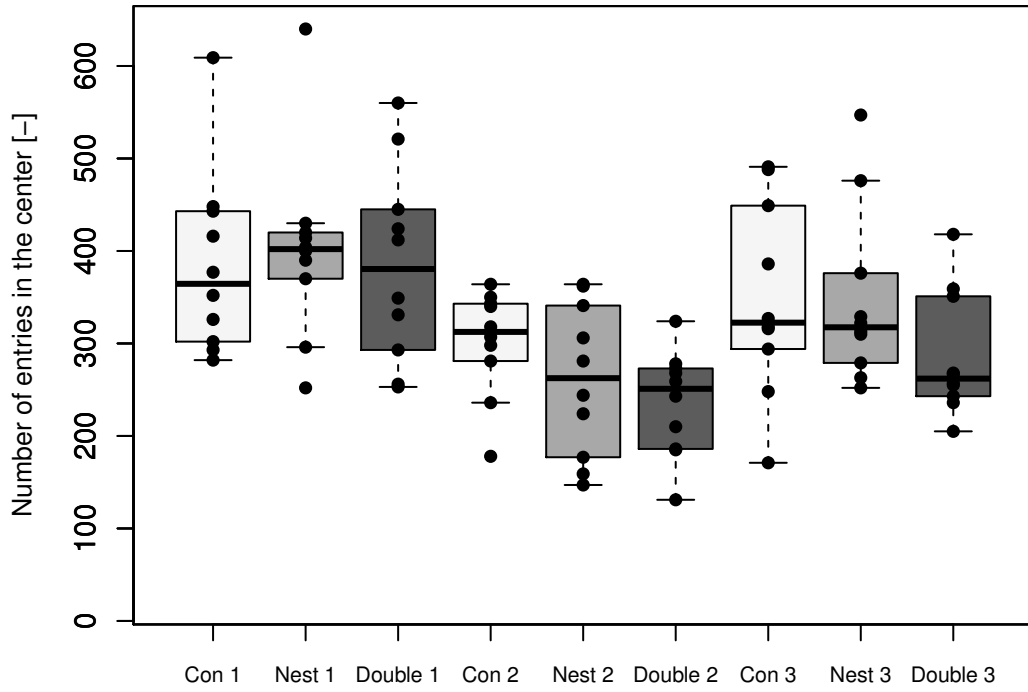**D2 female**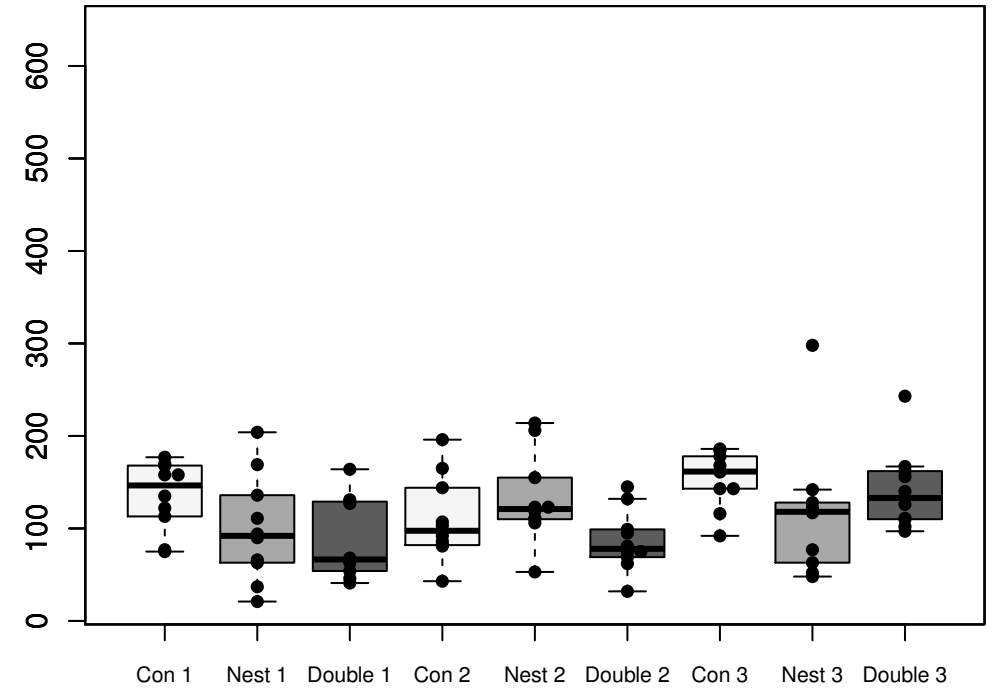**B6 male**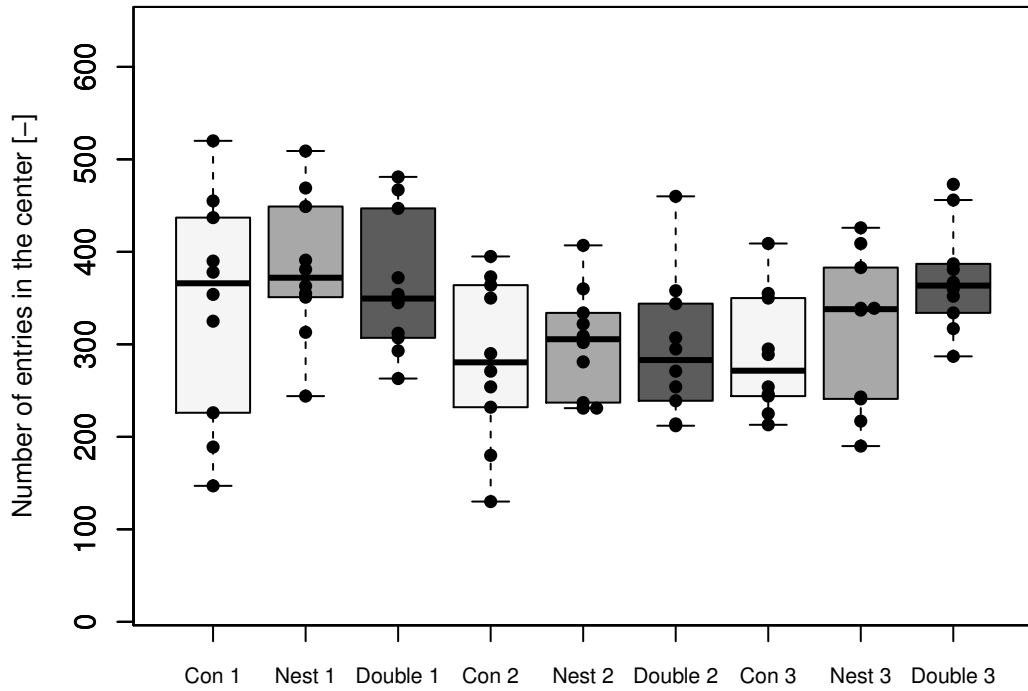**D2 male**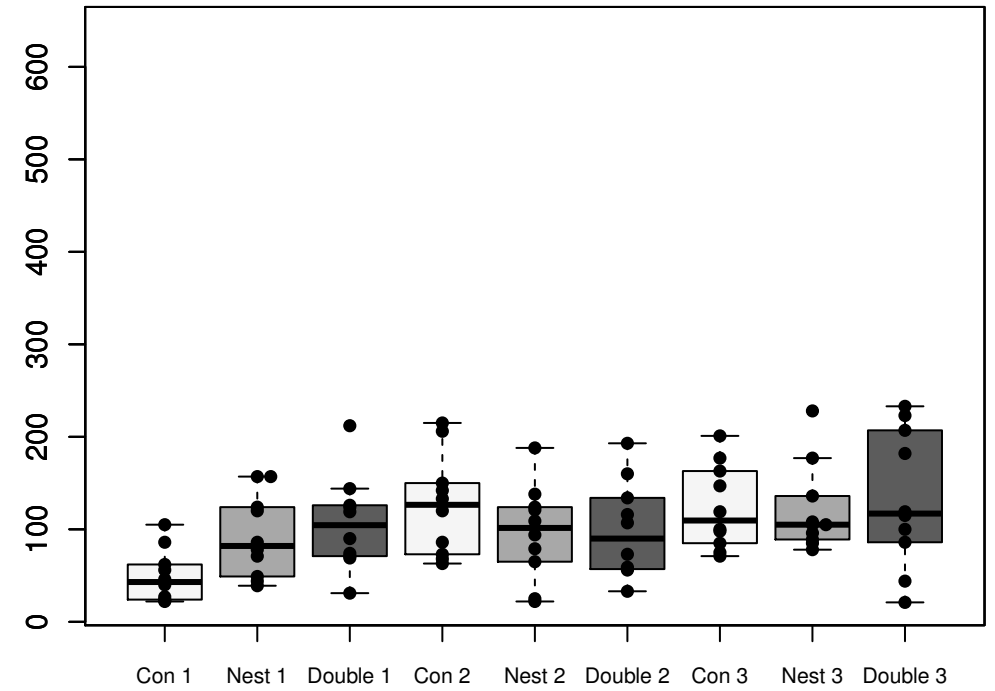



**B6 female**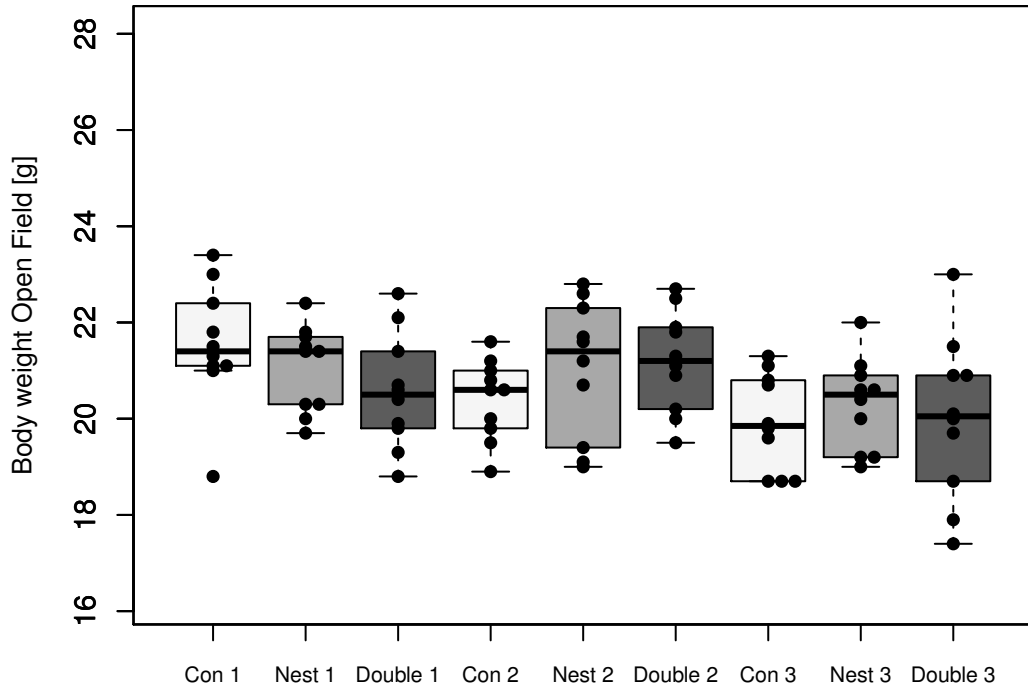**D2 female**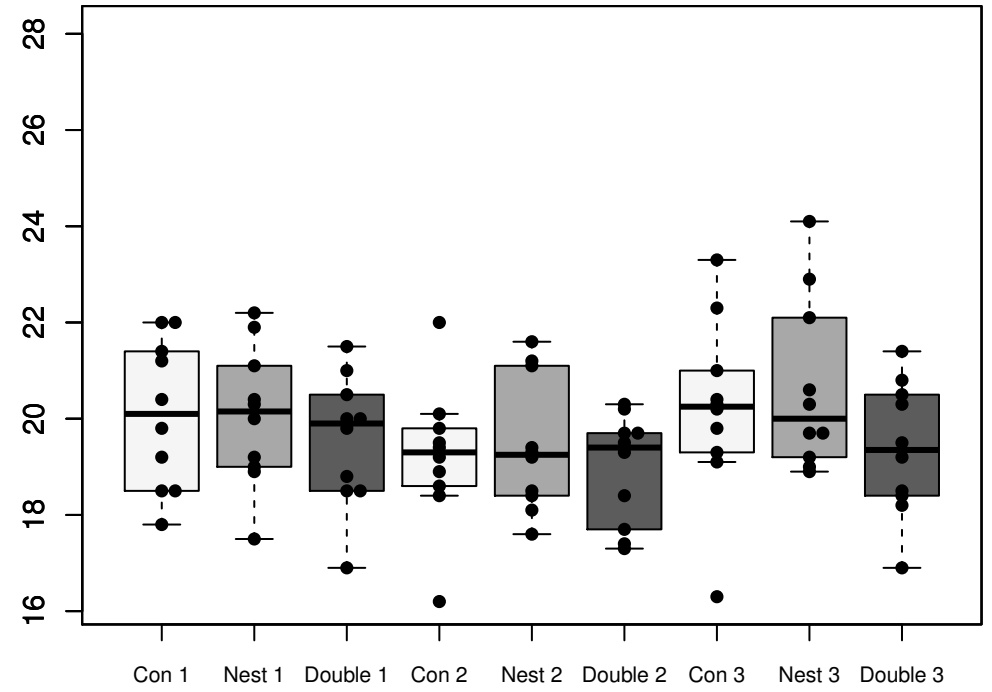**B6 male**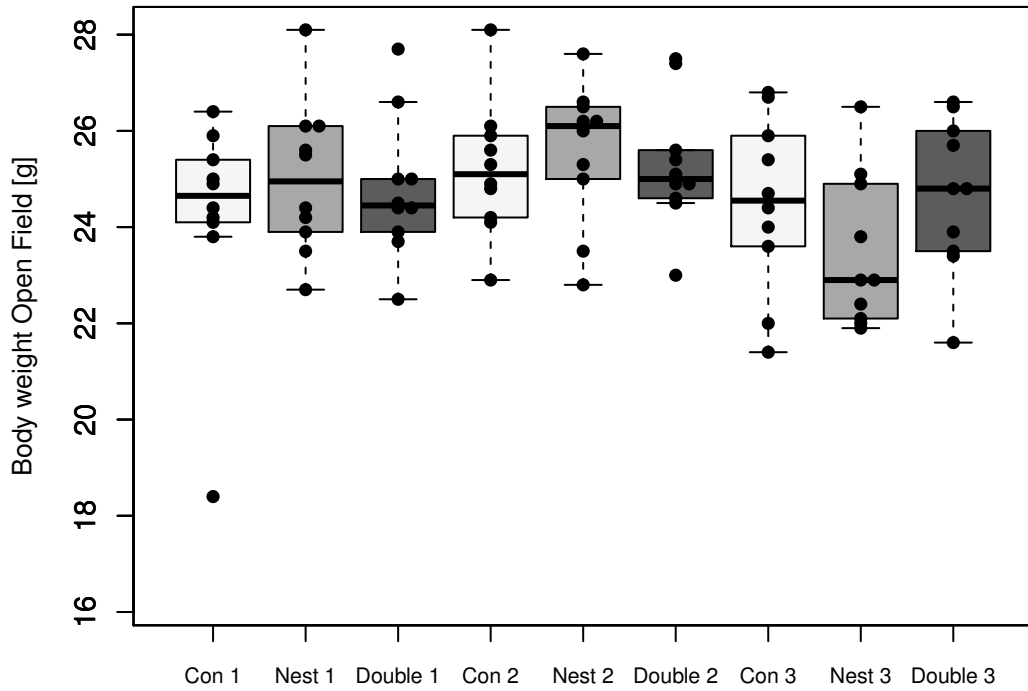**D2 male**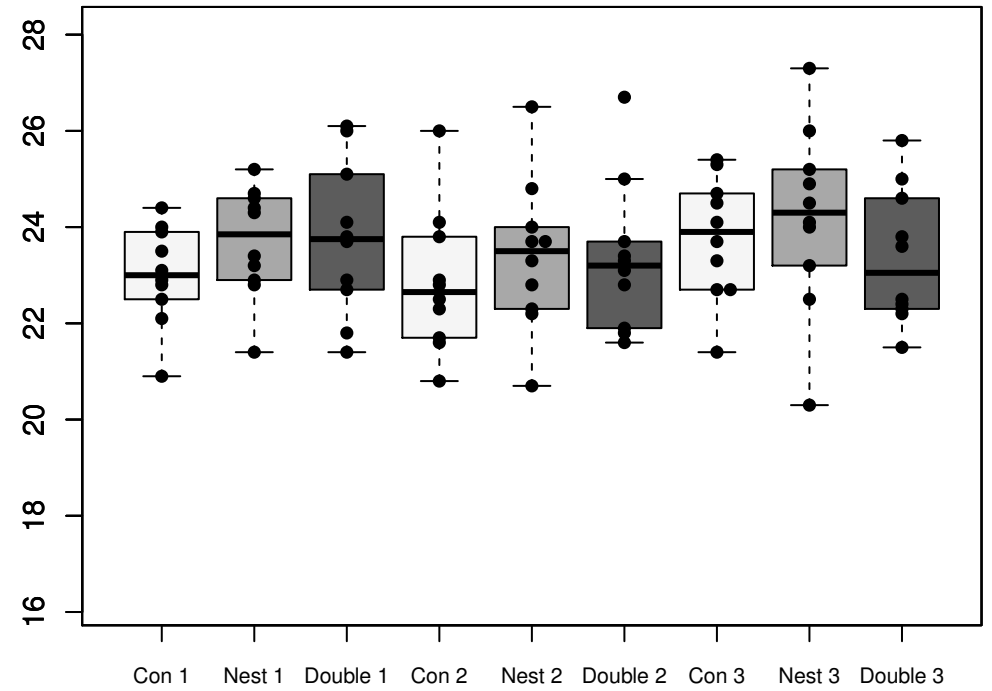

**B6 female**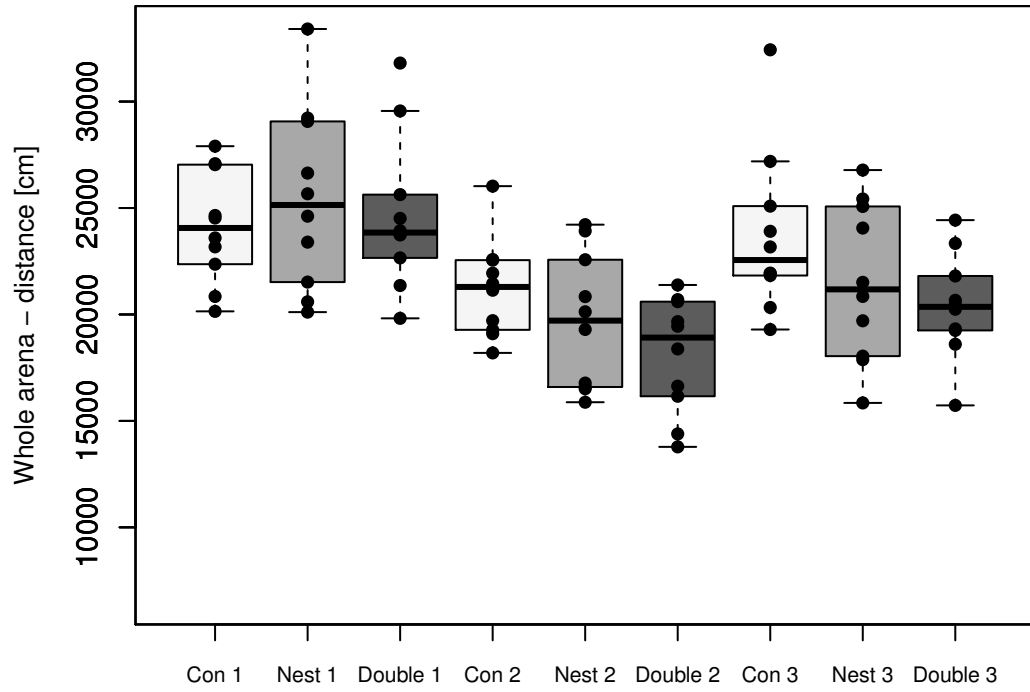**D2 female****B6 male**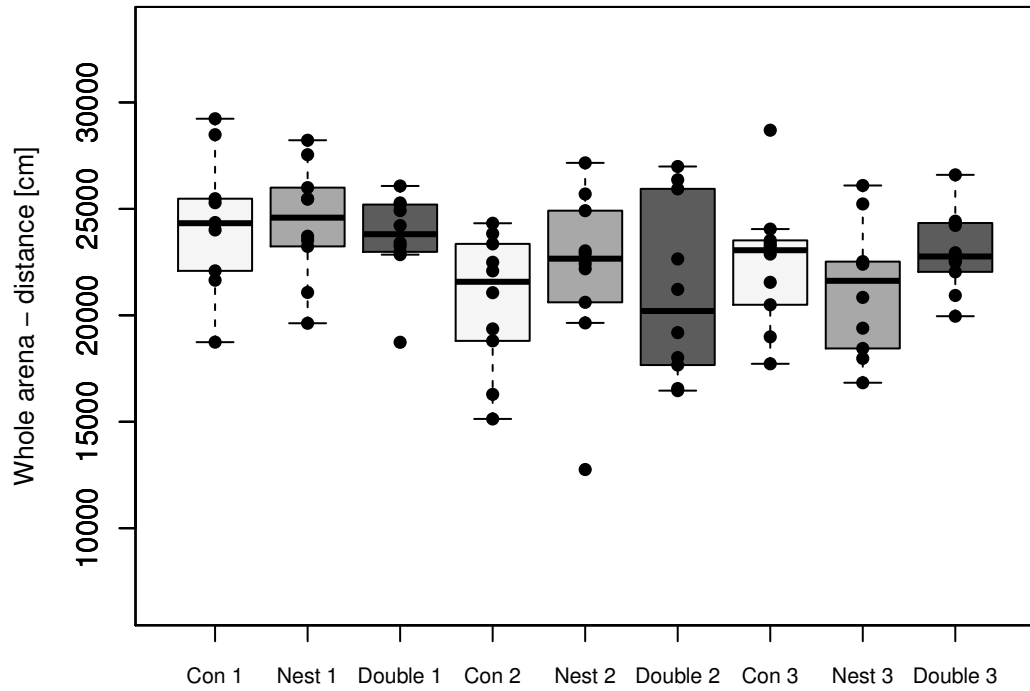**D2 male**

**B6 female**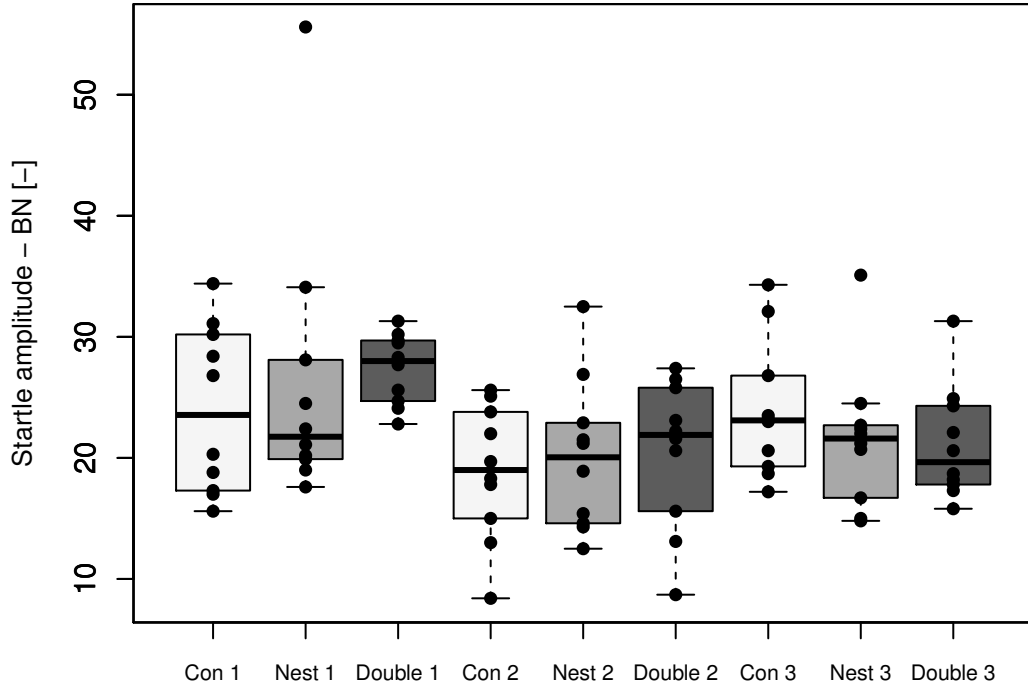**D2 female**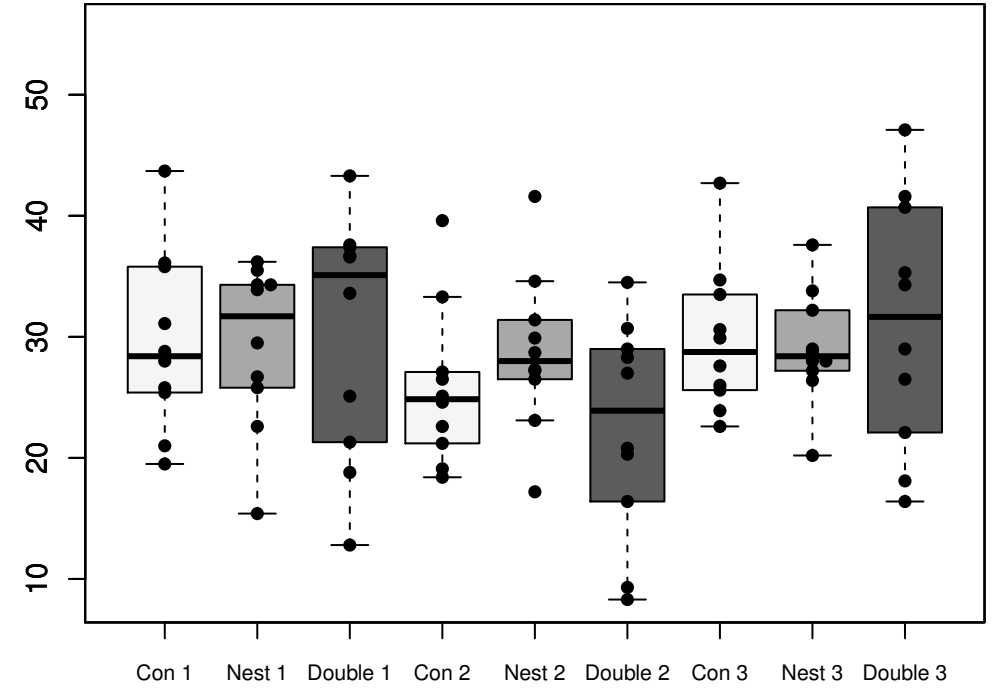**B6 male**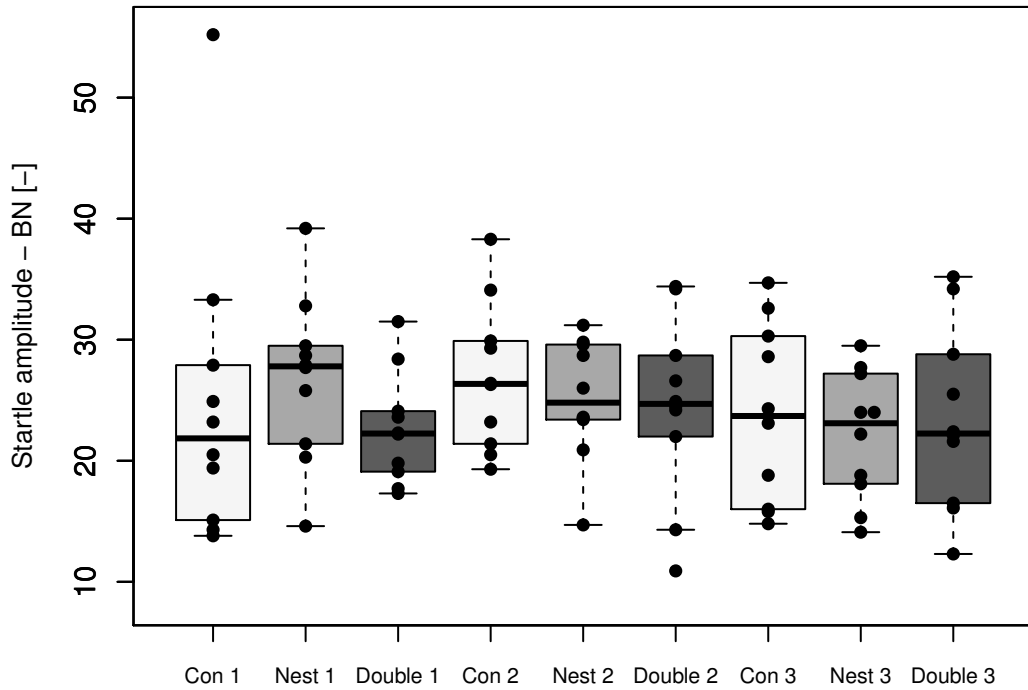**D2 male**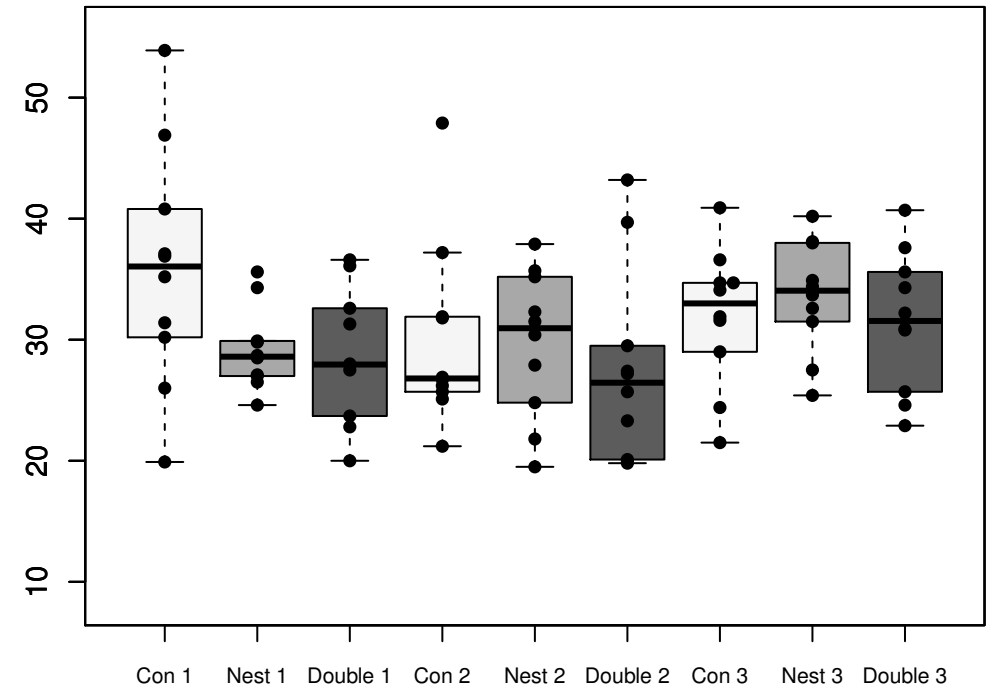

**B6 female**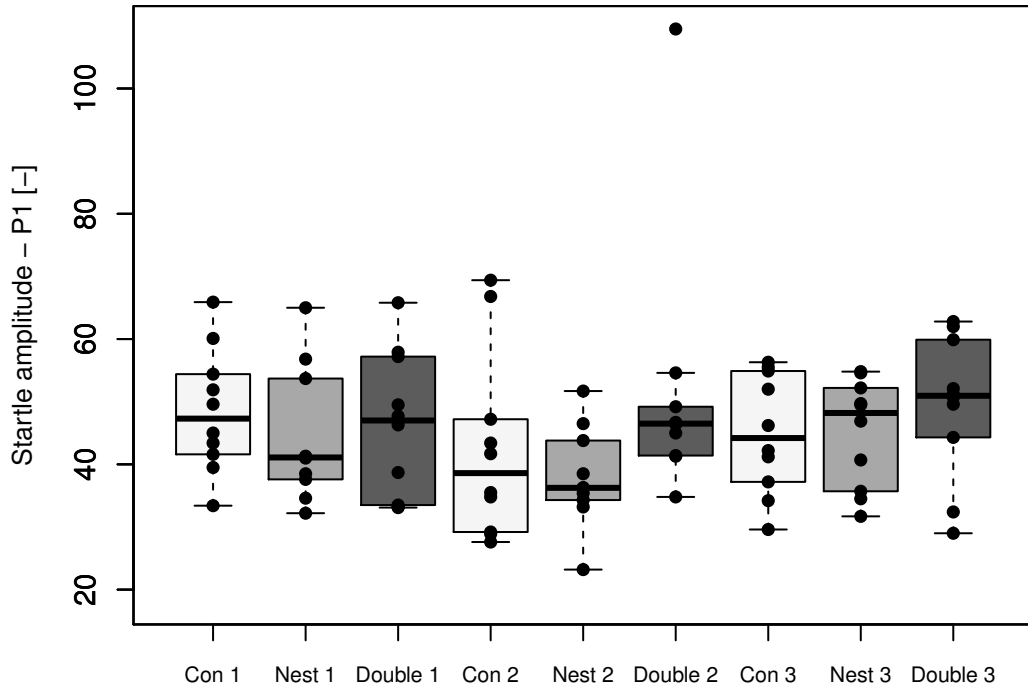**D2 female**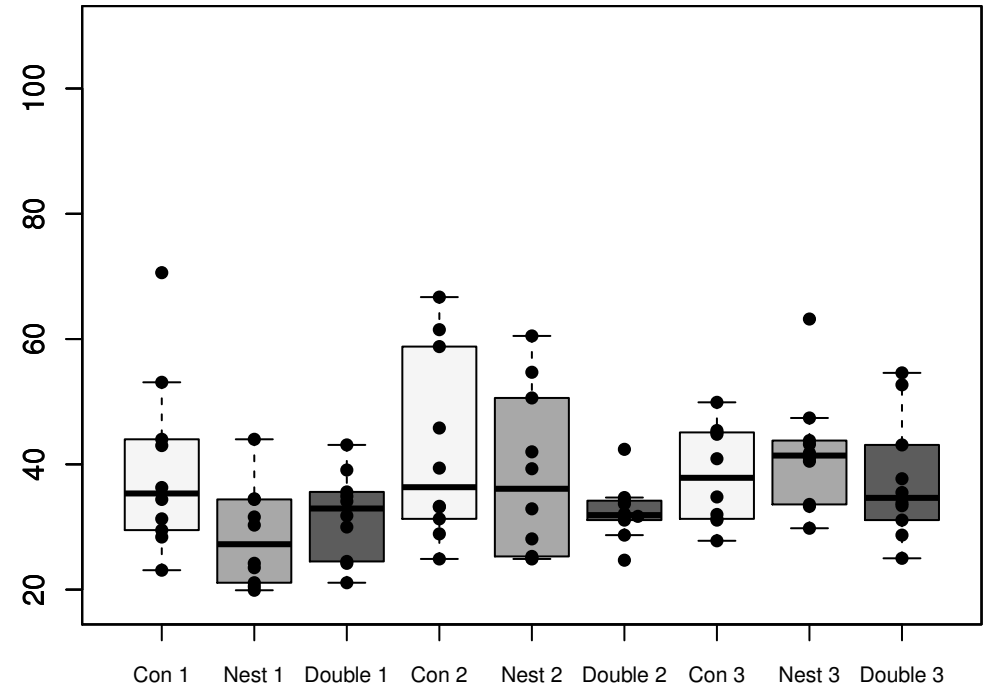**B6 male**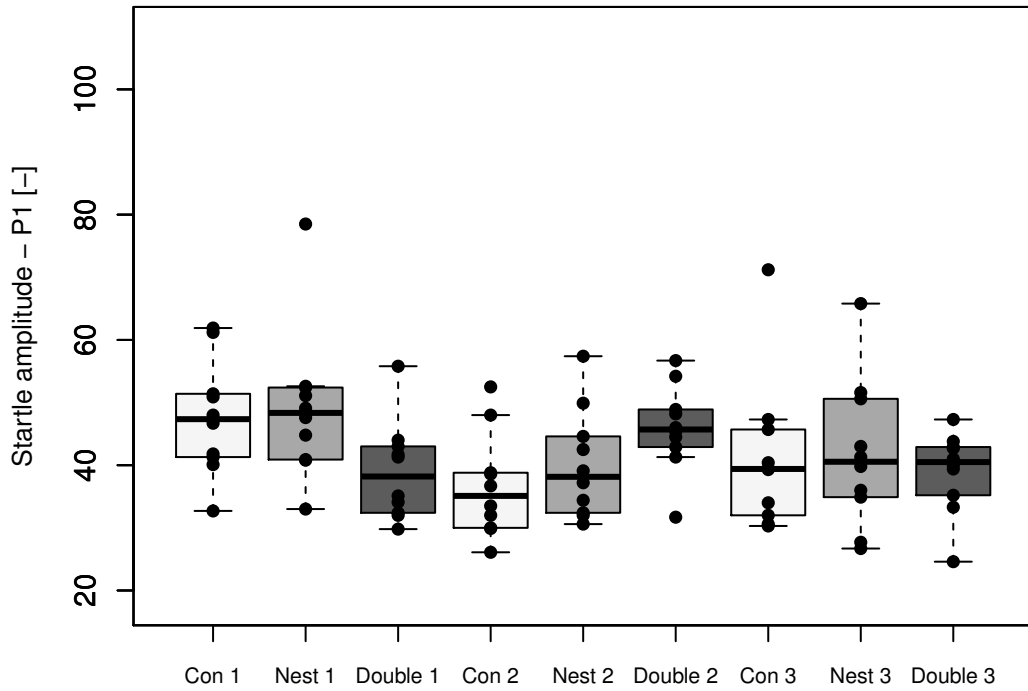**D2 male**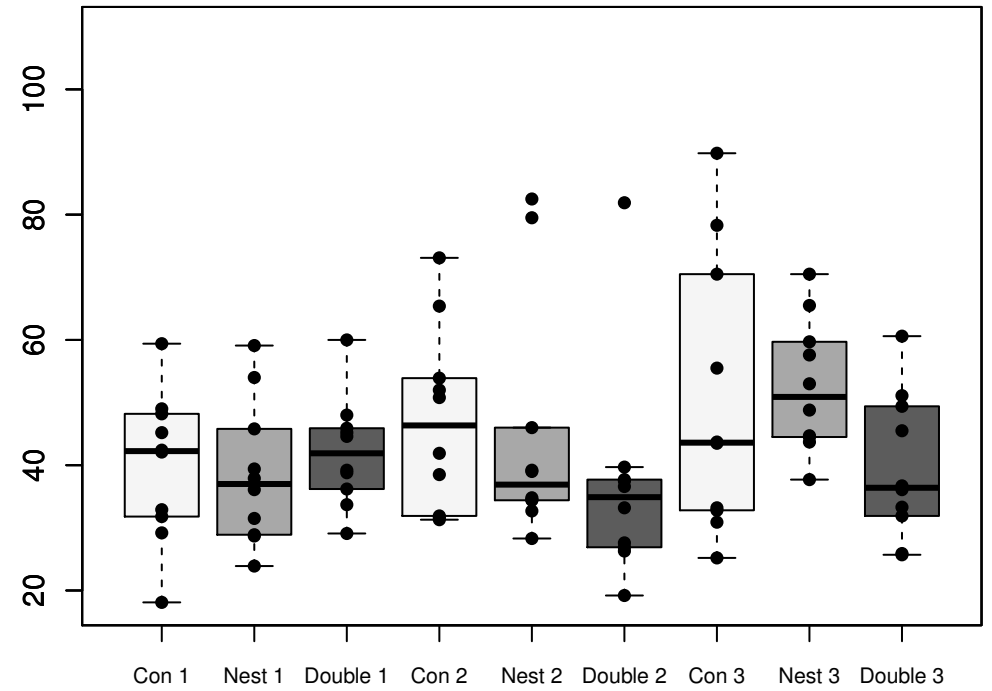

**B6 female**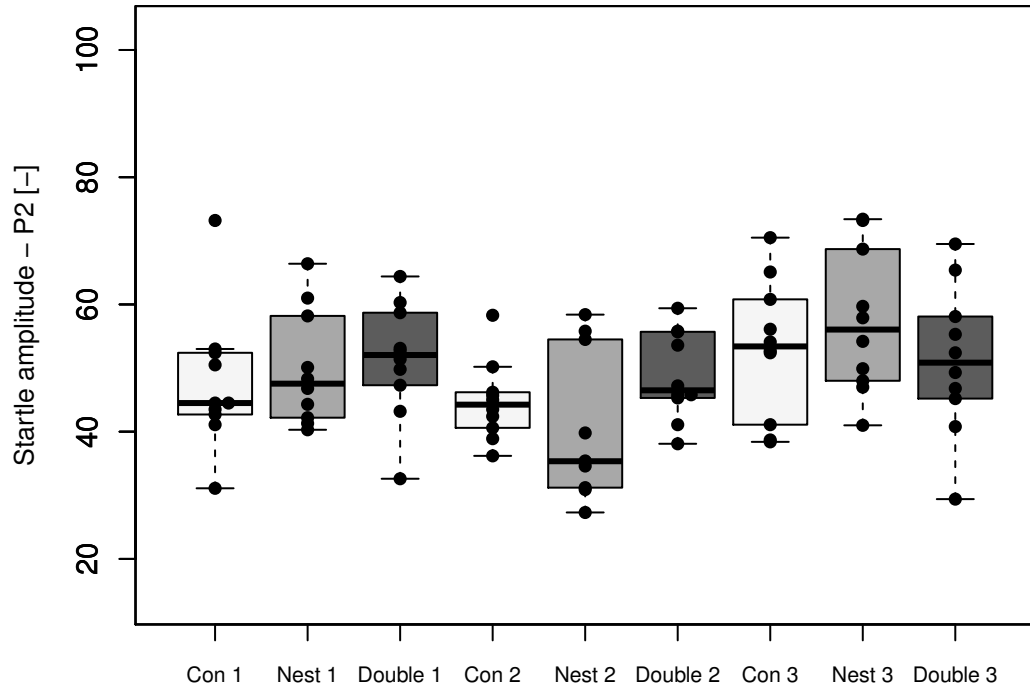**D2 female**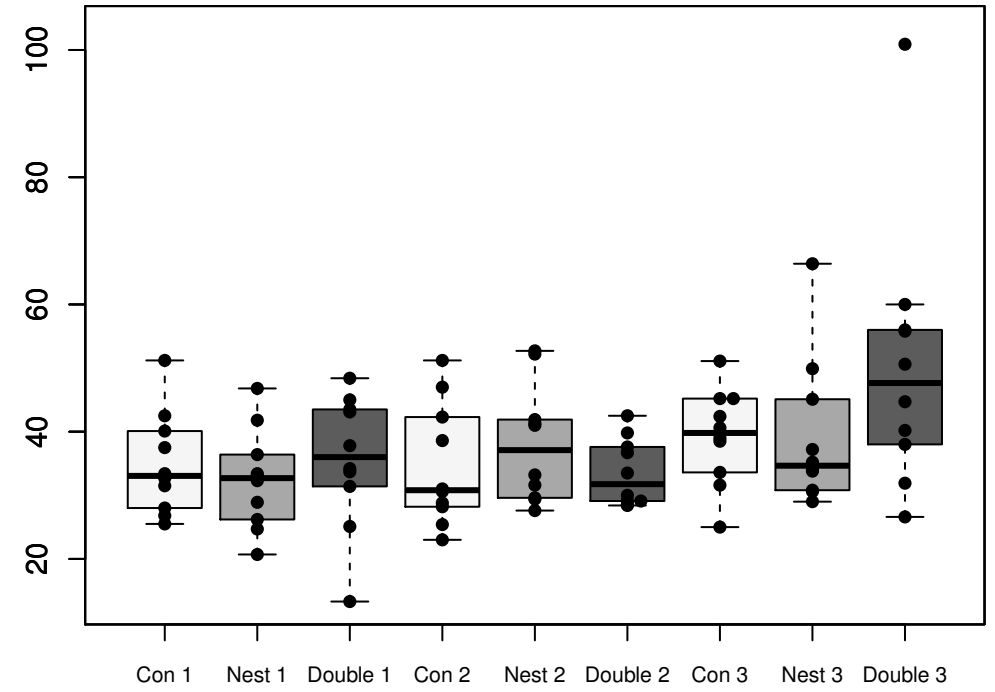**B6 male**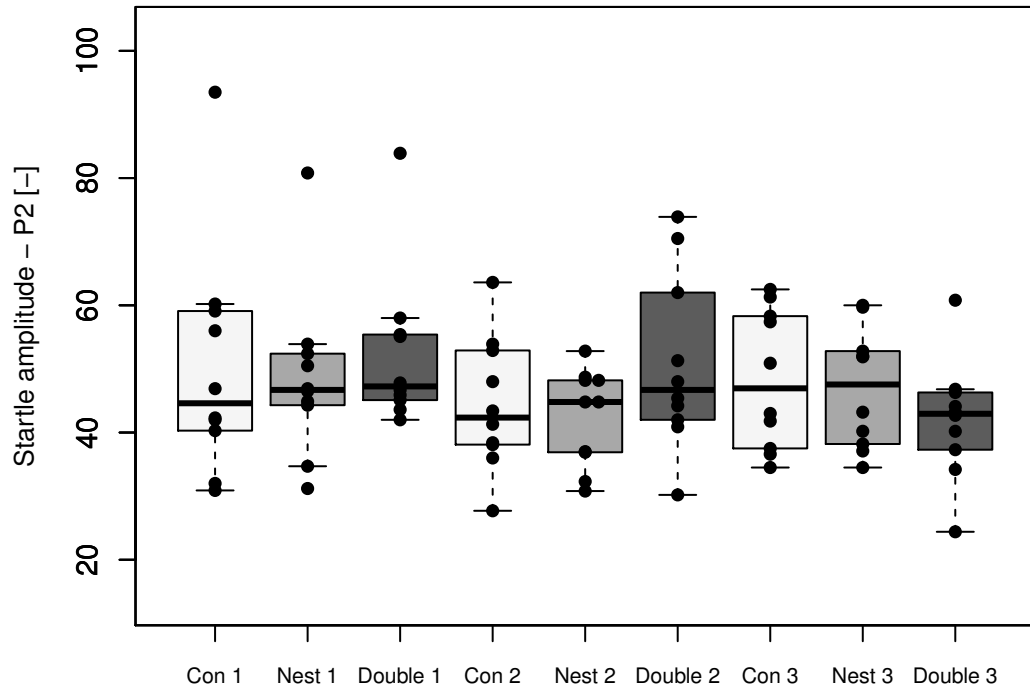**D2 male**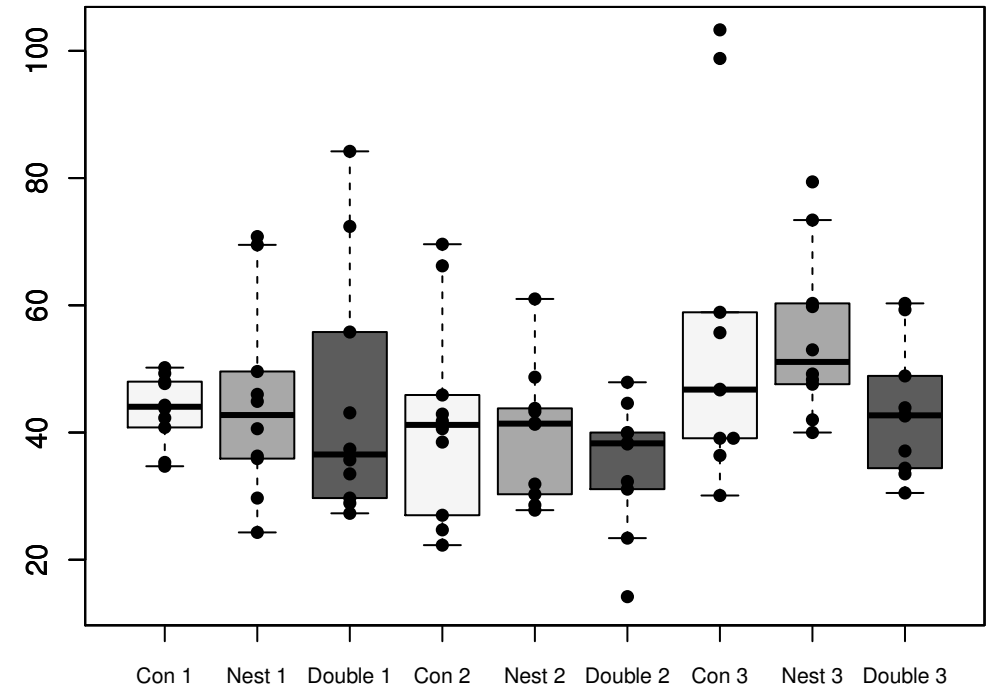

**B6 female**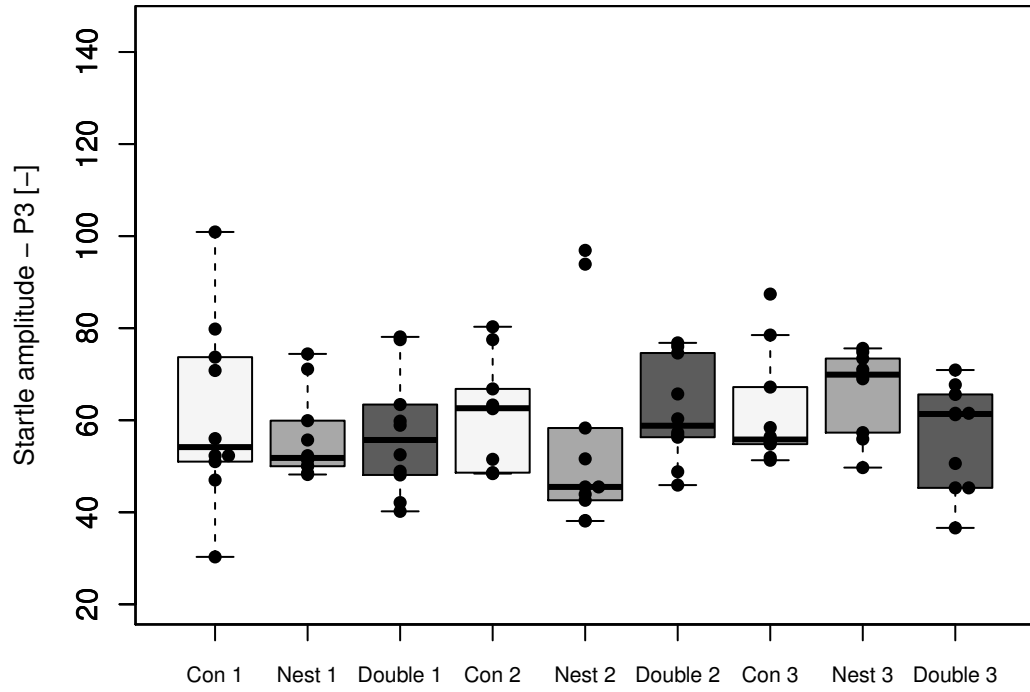**D2 female**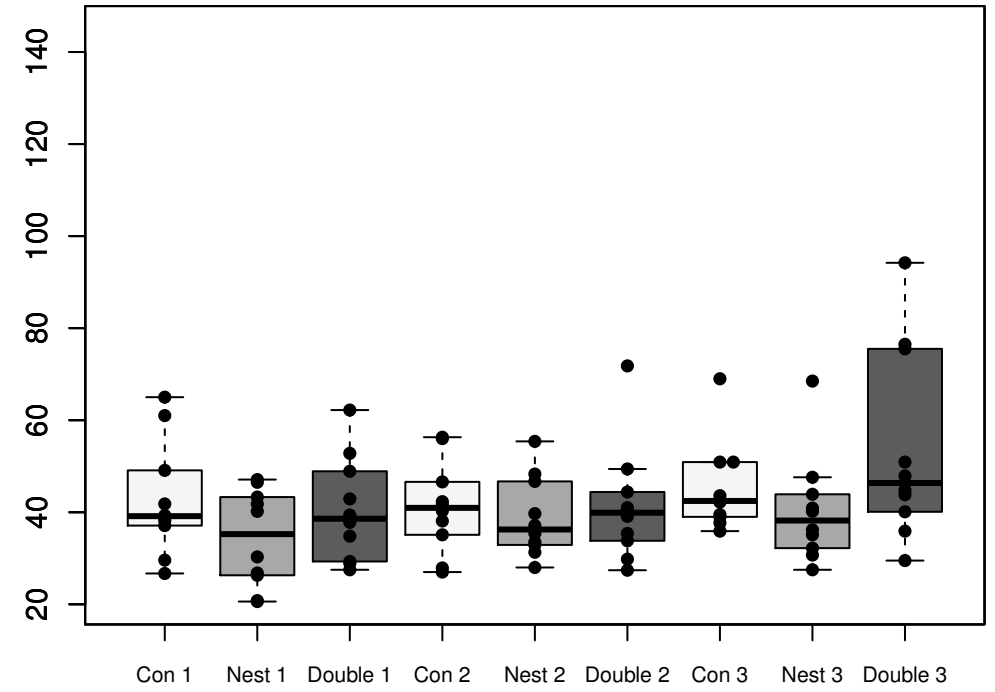**B6 male**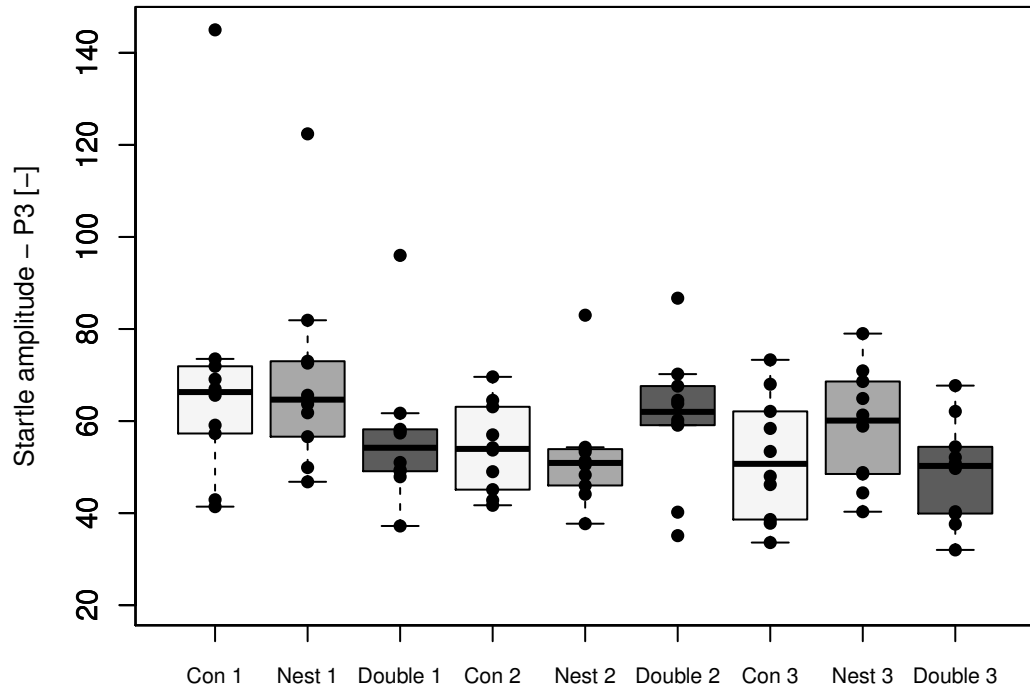**D2 male**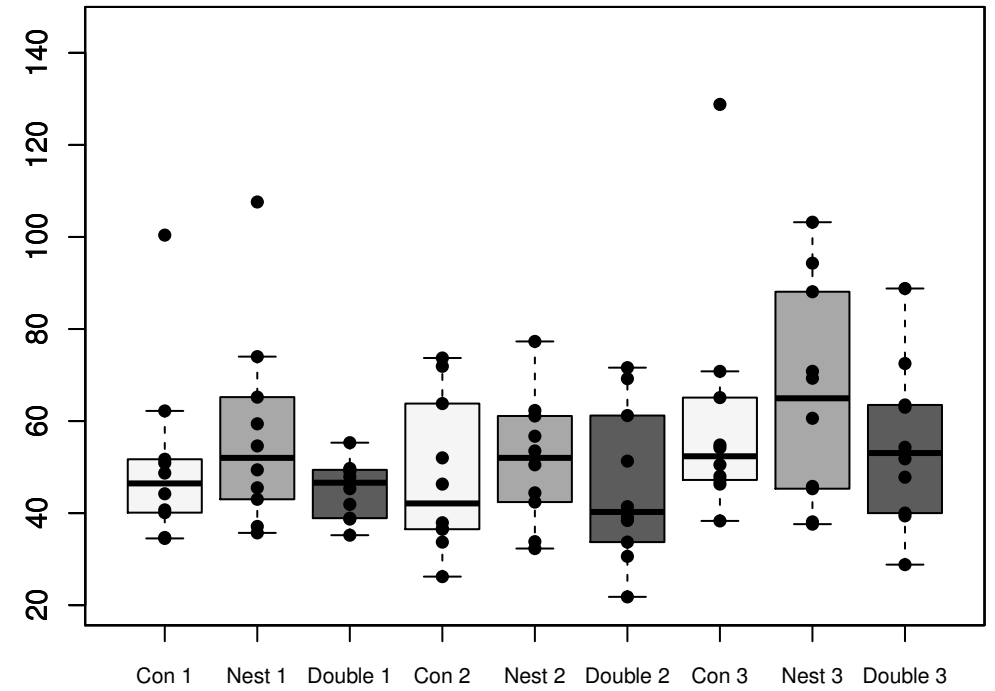

**B6 female**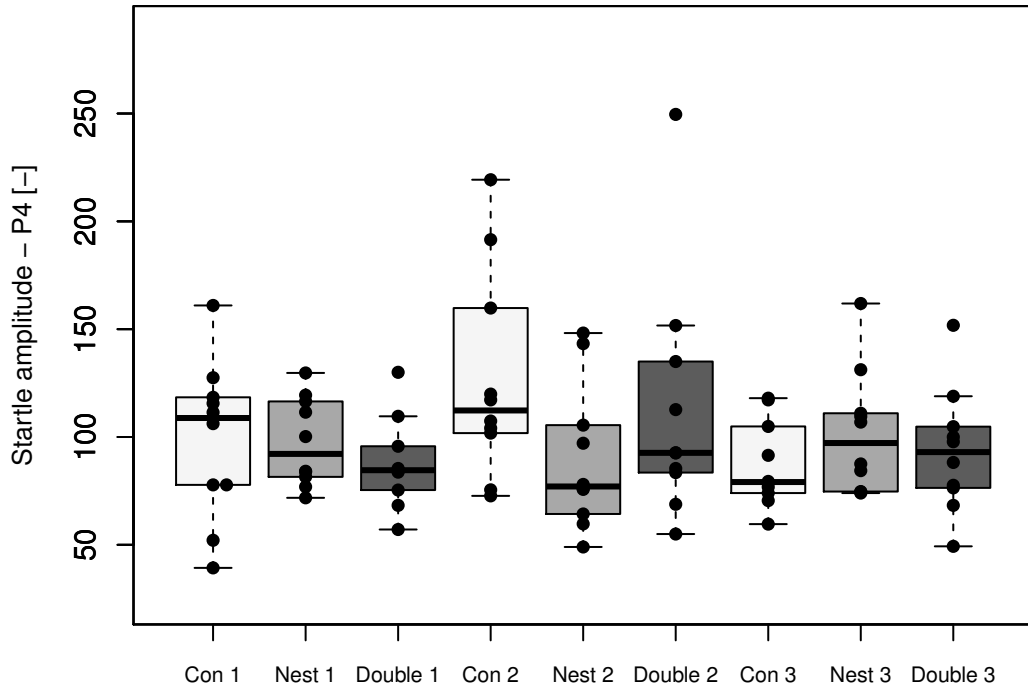**D2 female**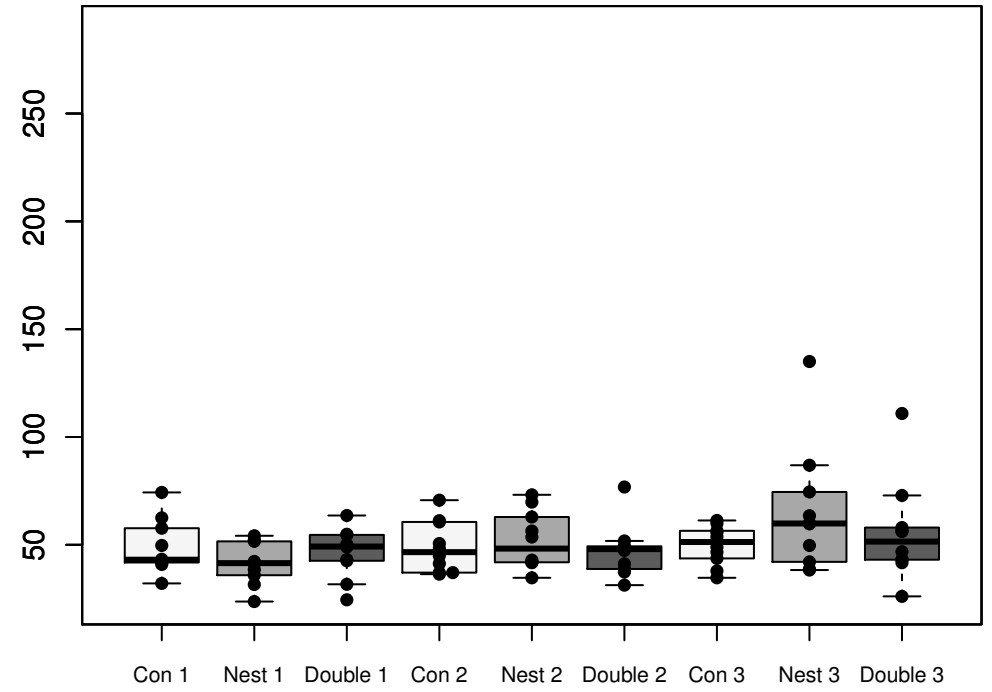**B6 male**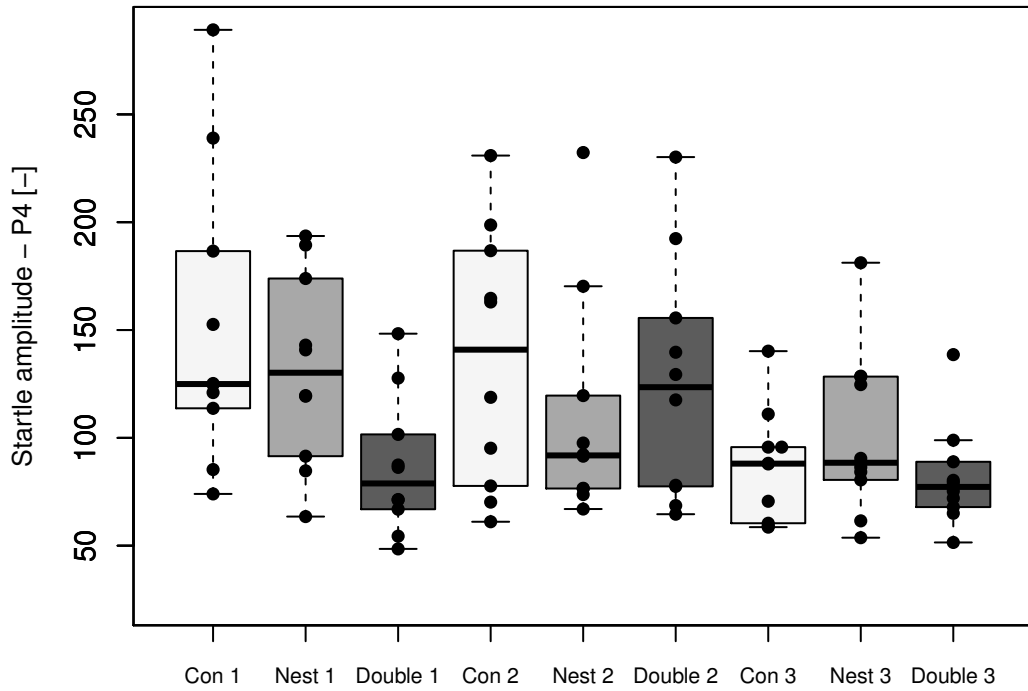**D2 male**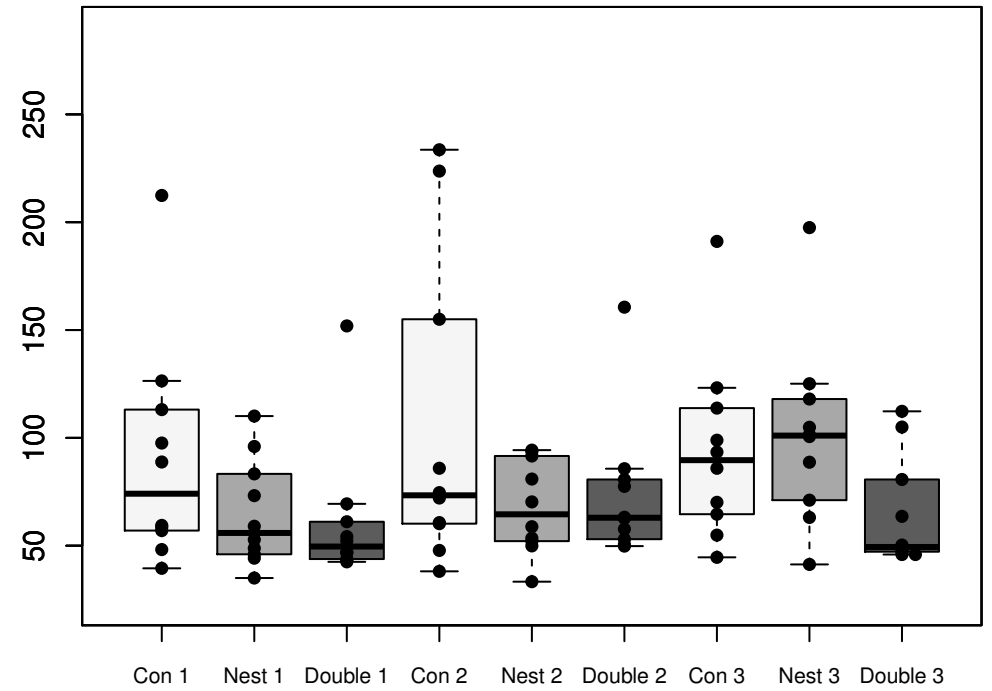

**B6 female**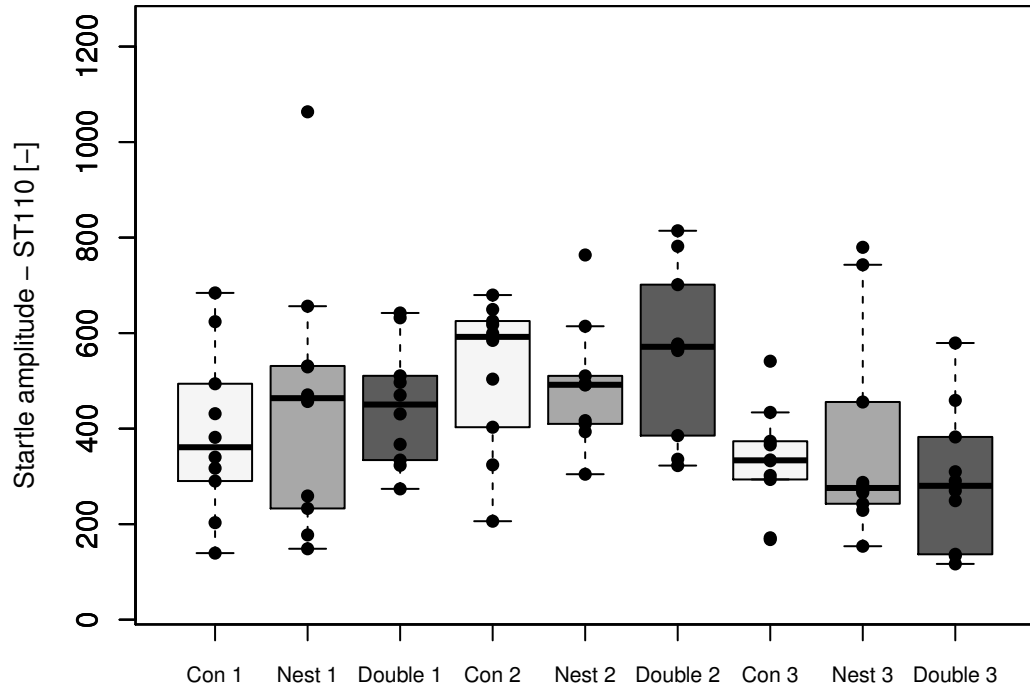**D2 female**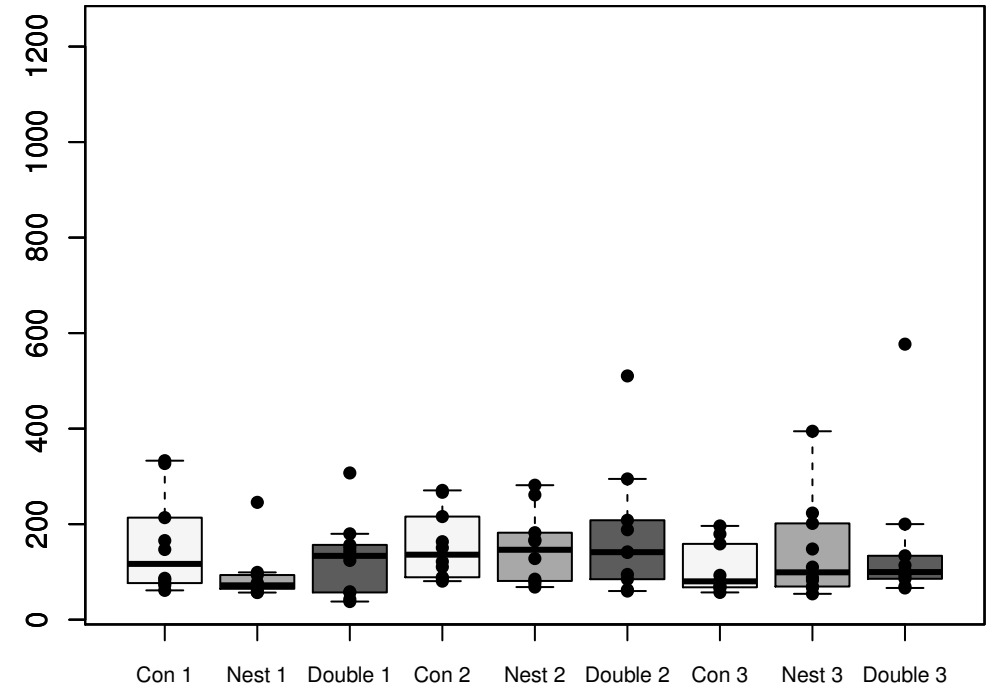**B6 male**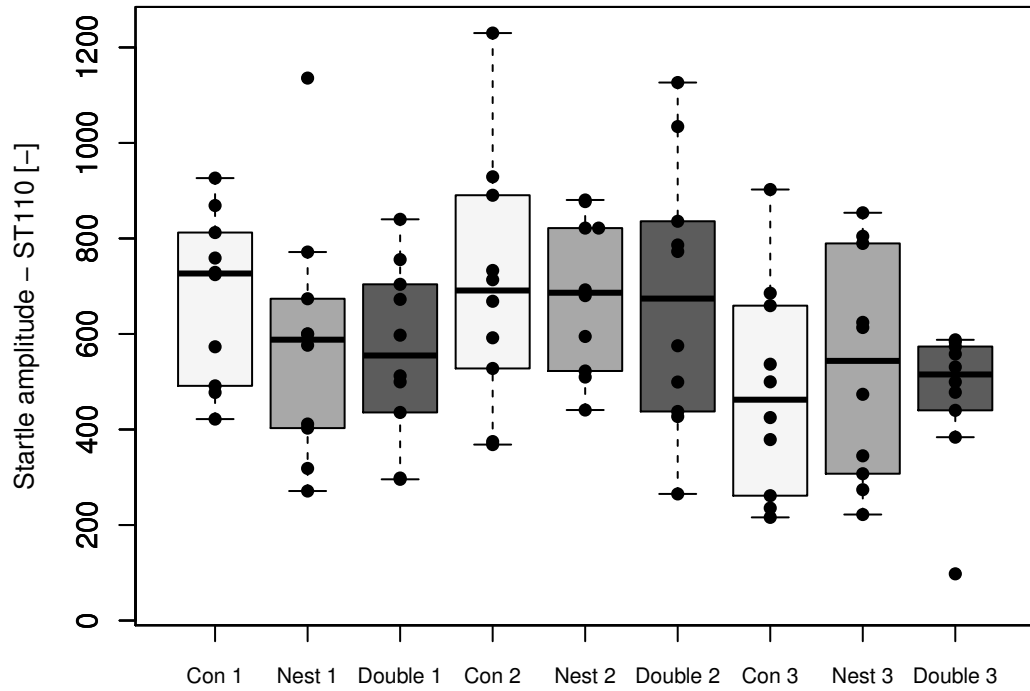**D2 male**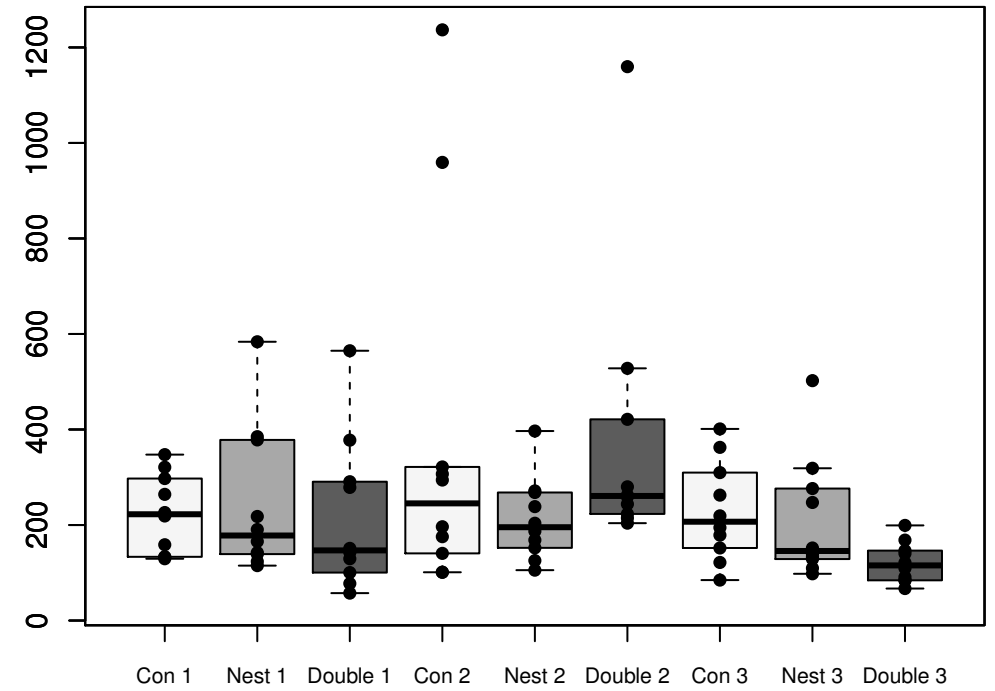



**B6 female**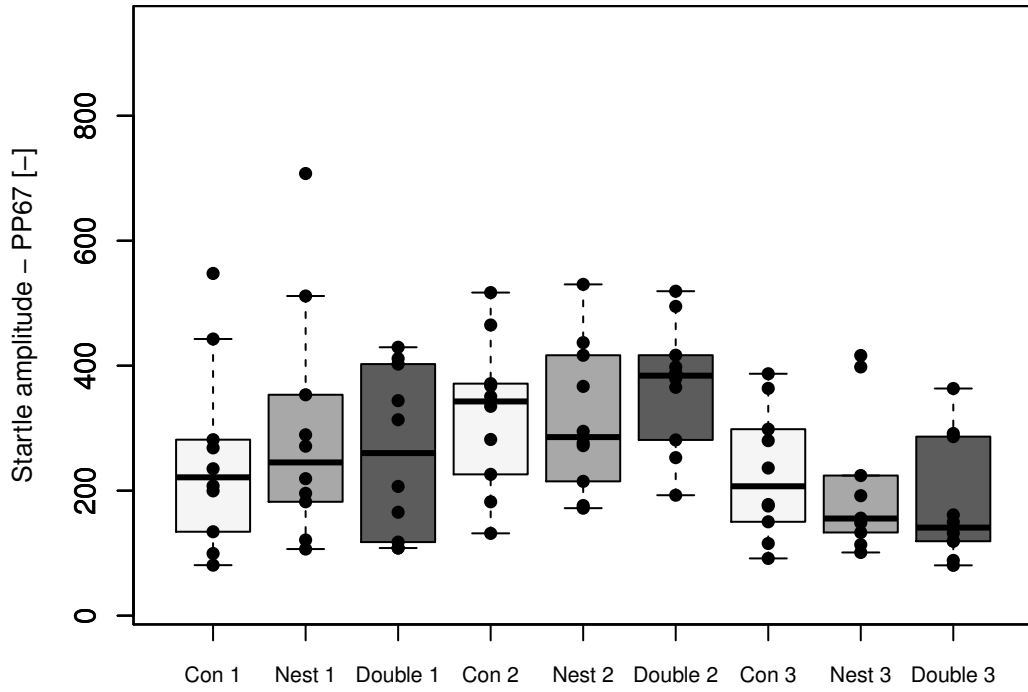**D2 female**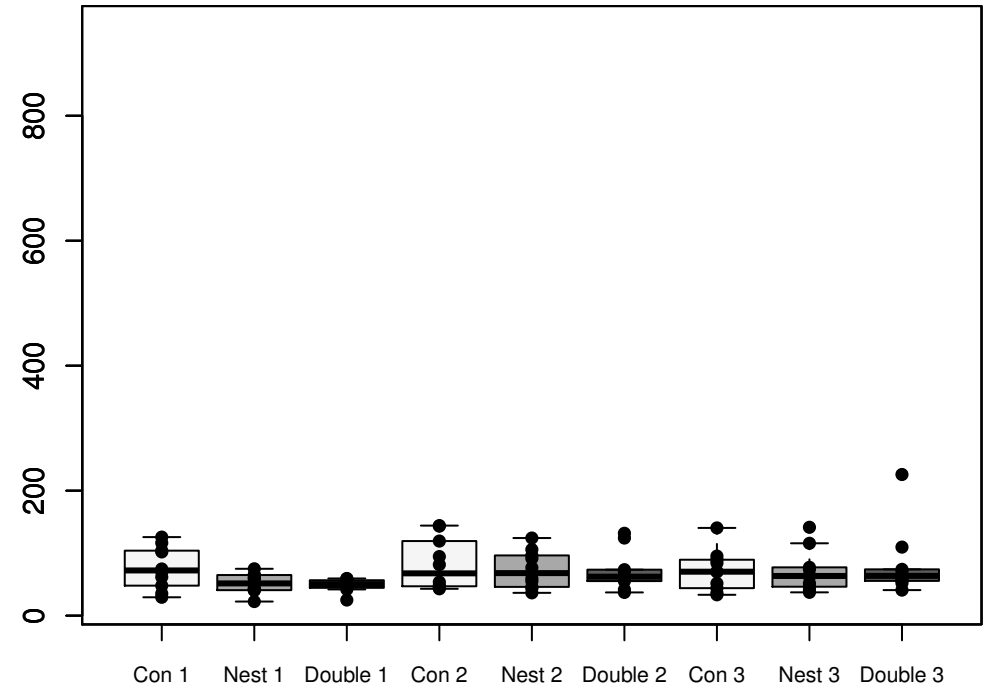**B6 male**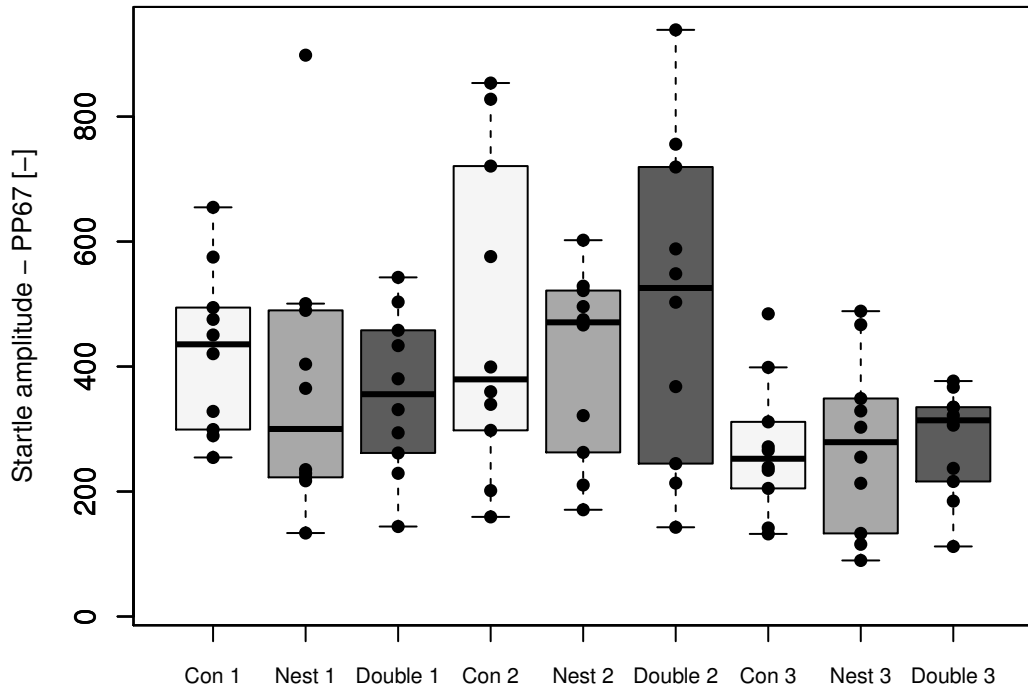**D2 male**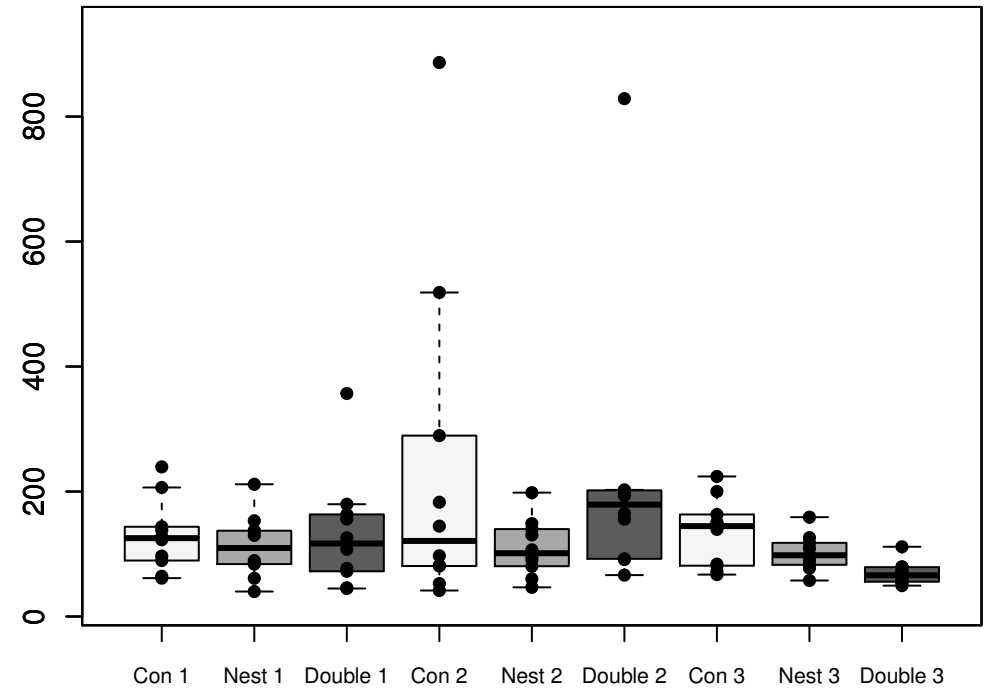

**B6 female**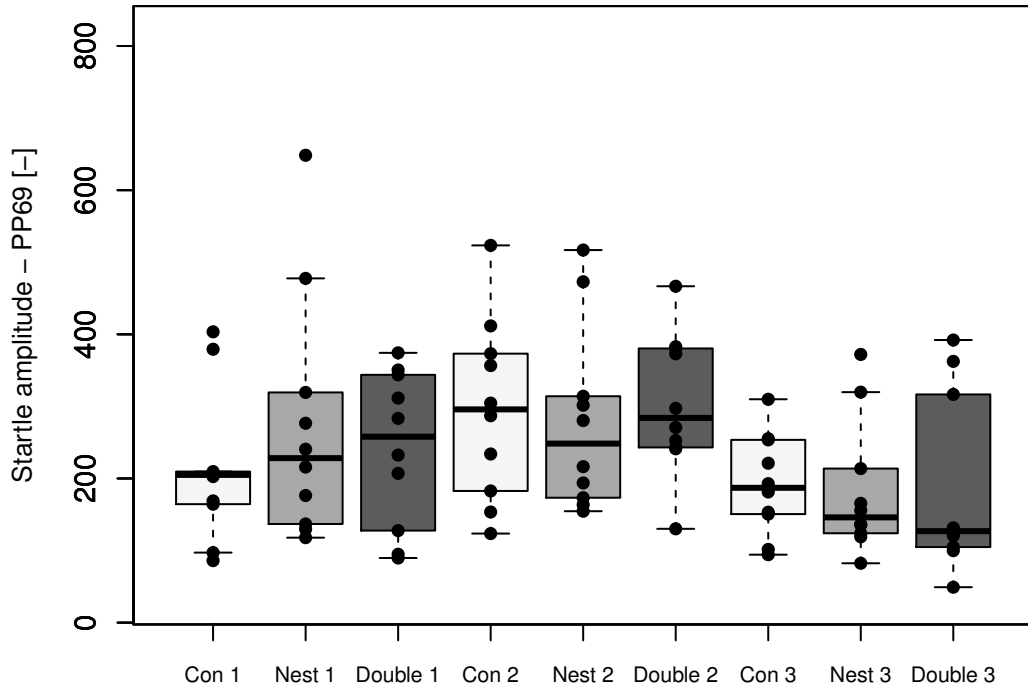**D2 female**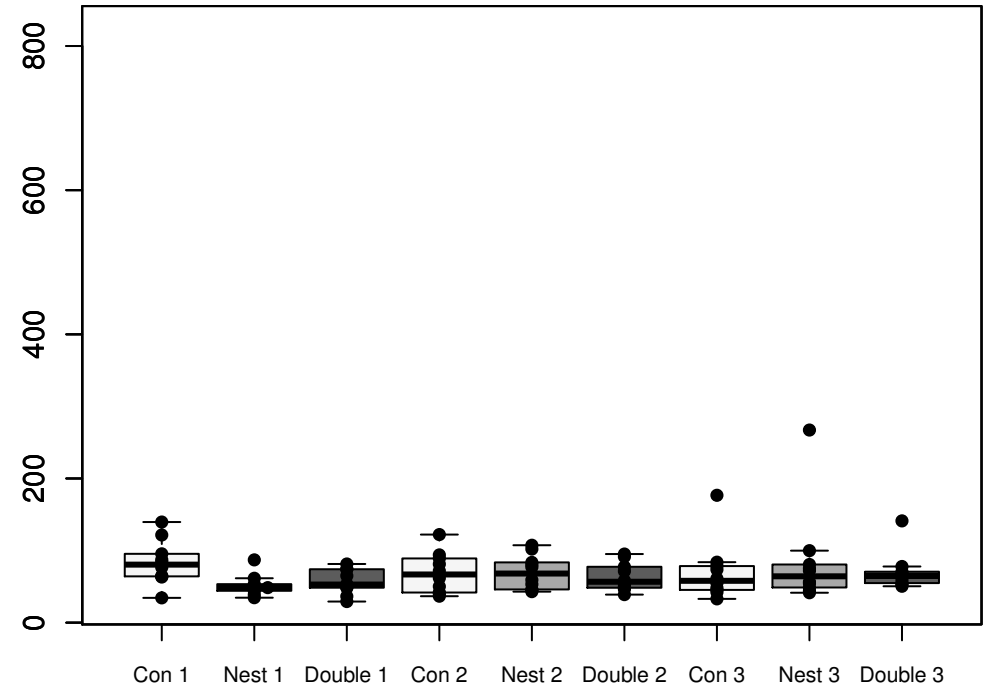**B6 male**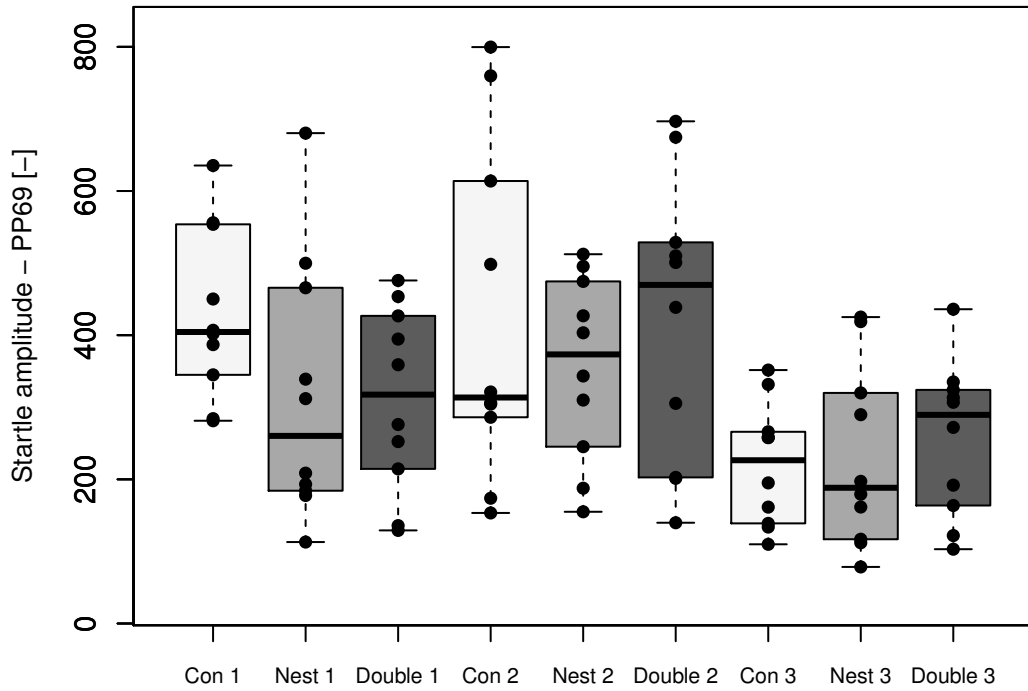**D2 male**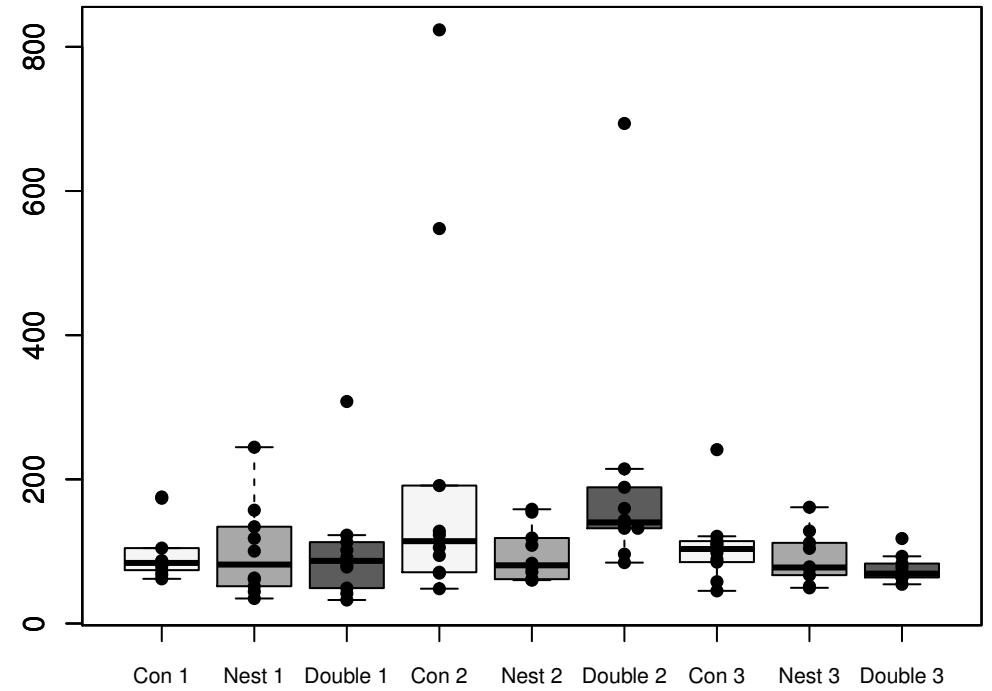

**B6 female**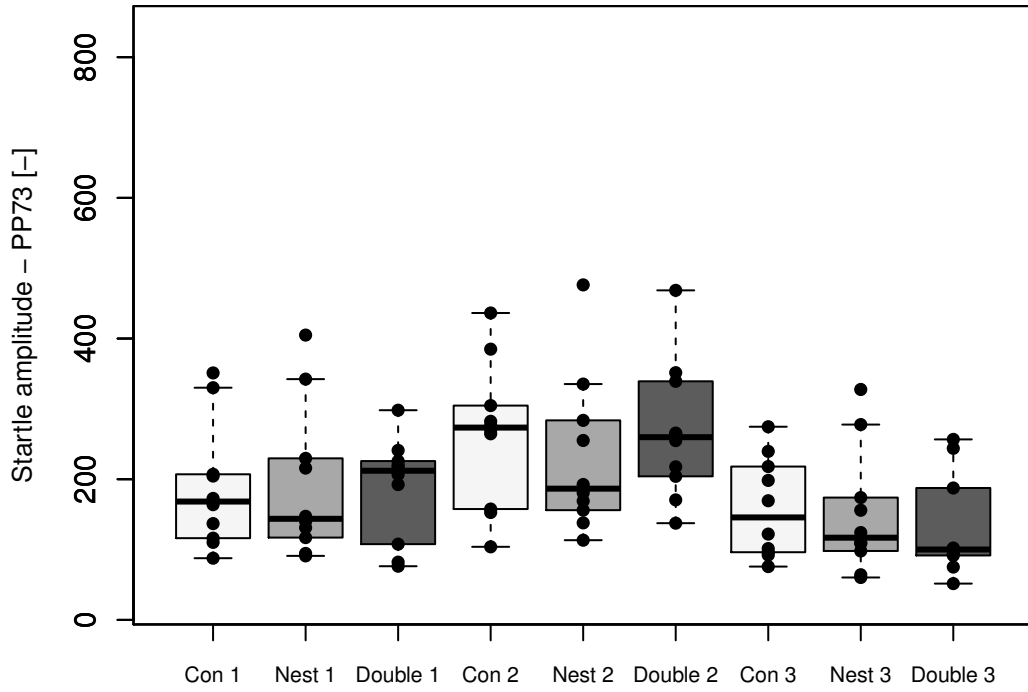**D2 female**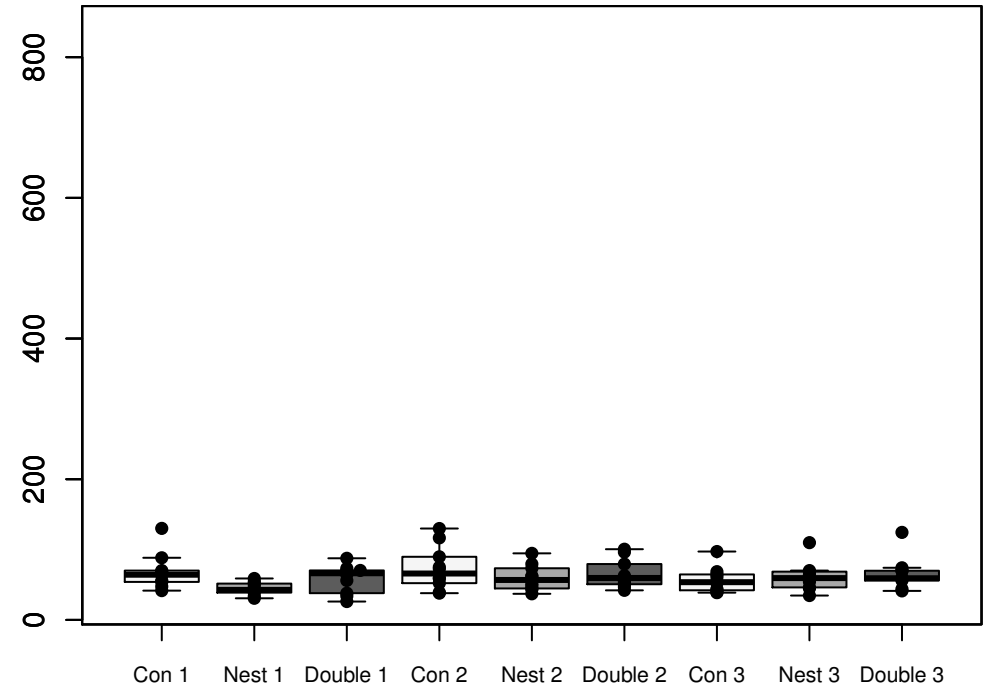**B6 male**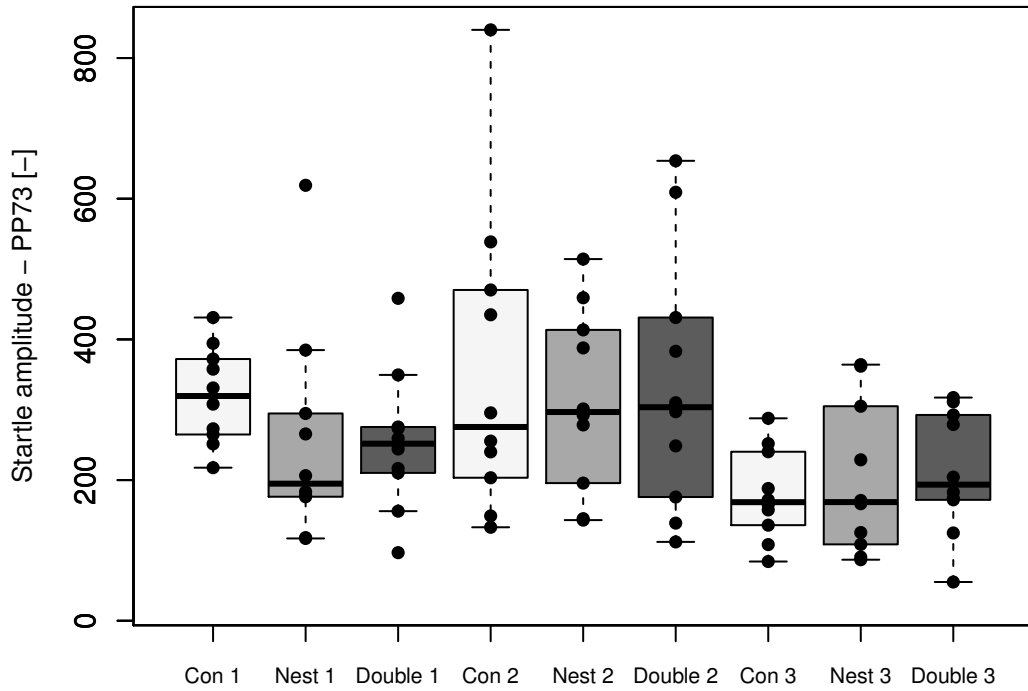**D2 male**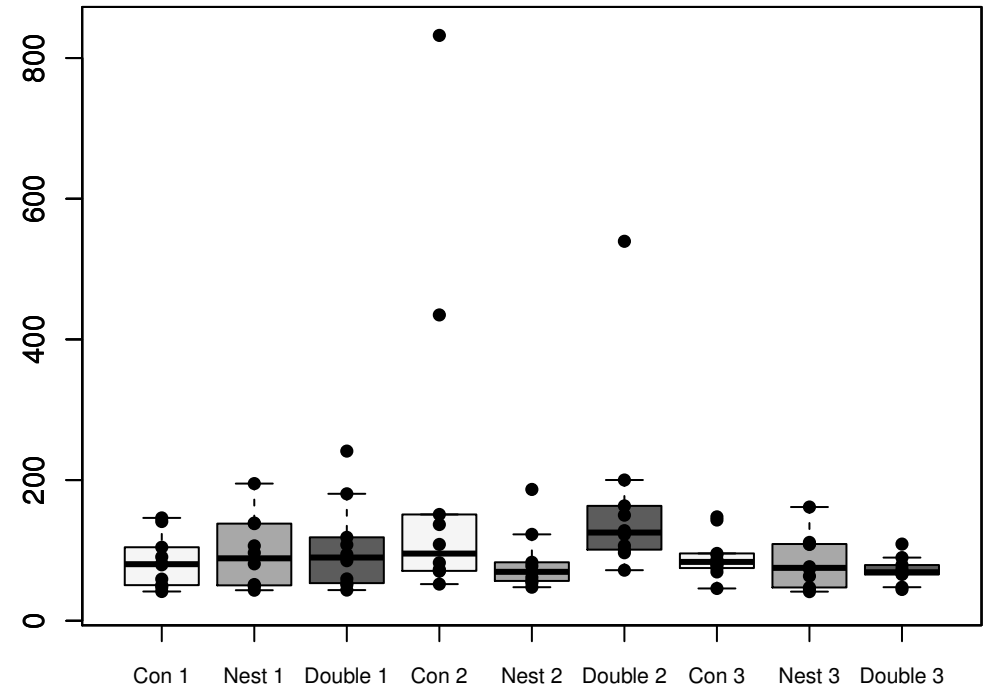

**B6 female**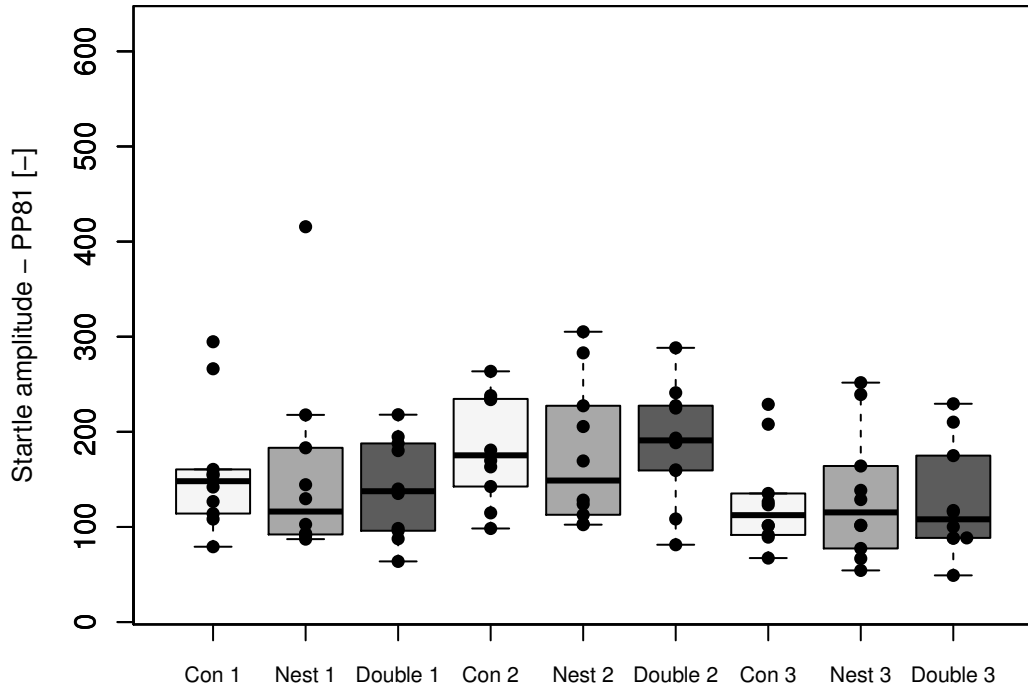**D2 female**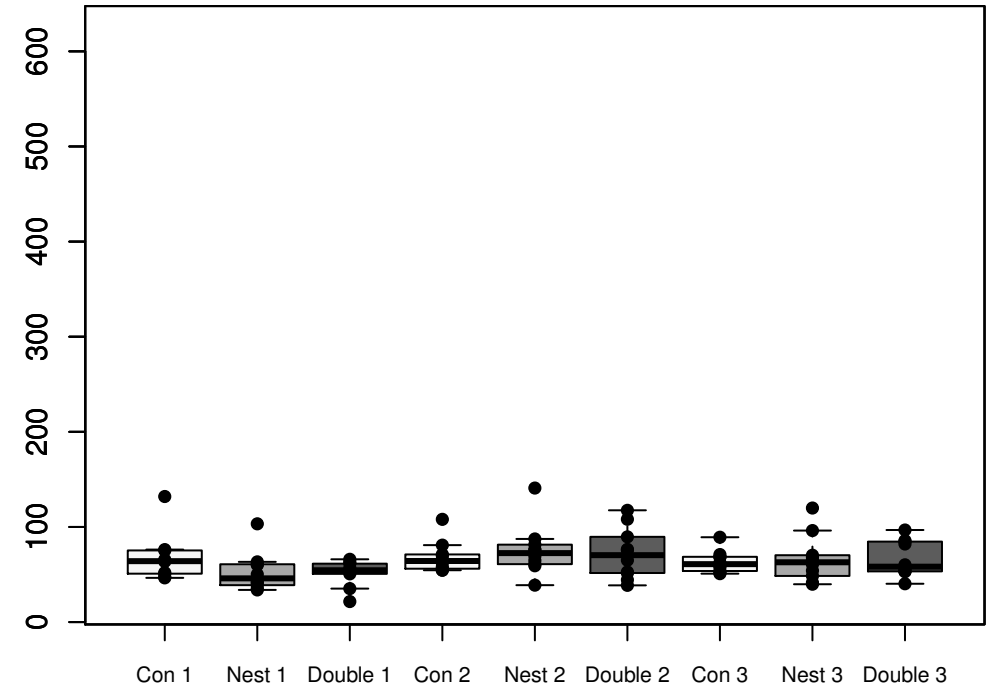**B6 male**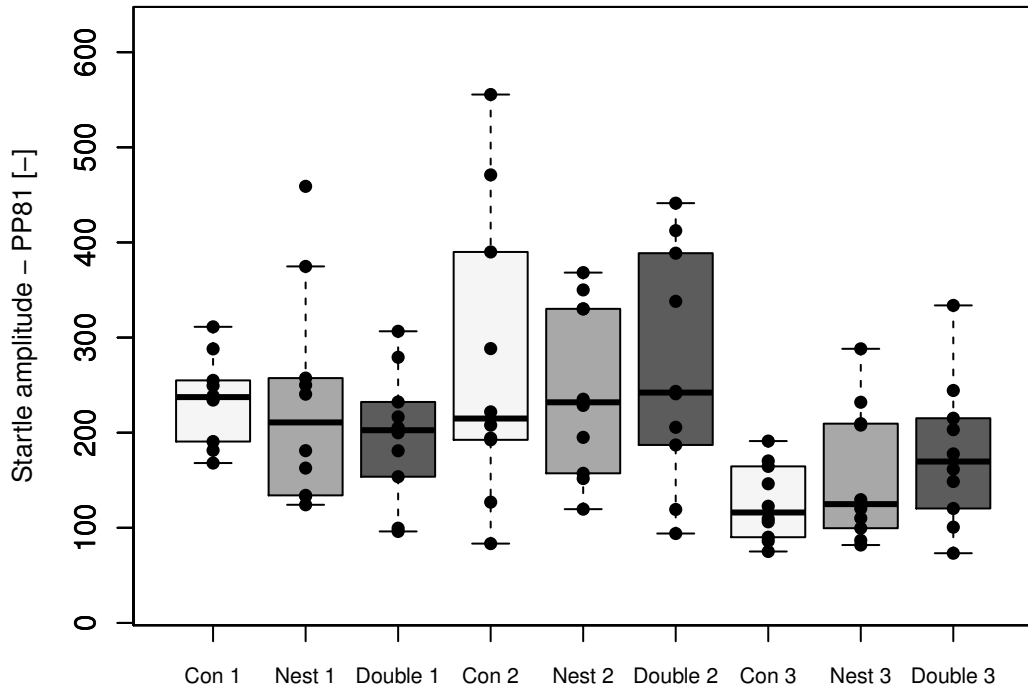**D2 male**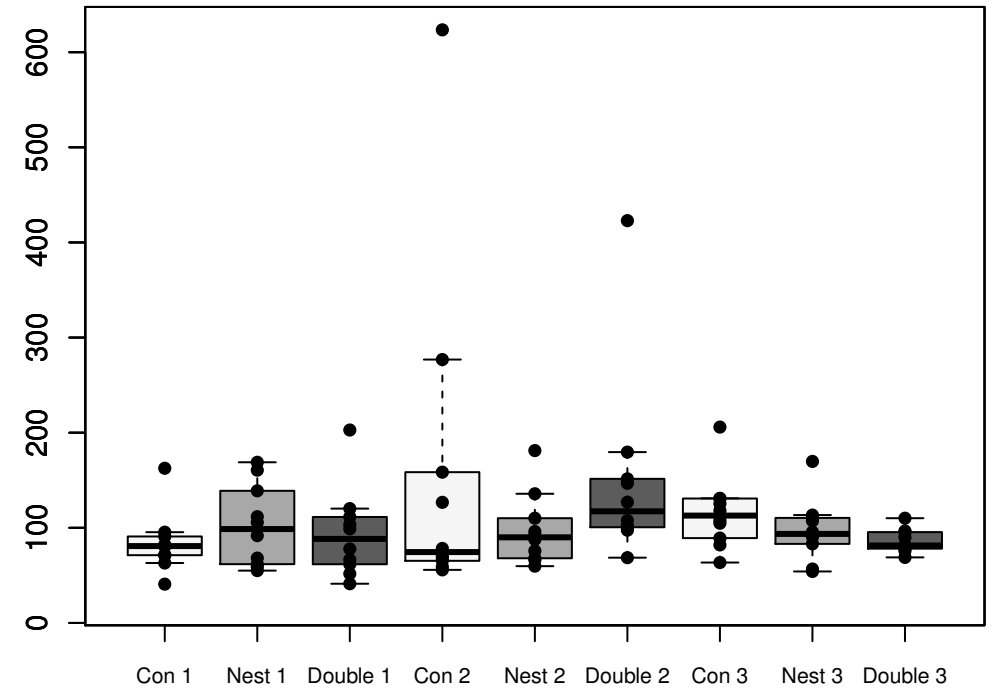

**B6 female**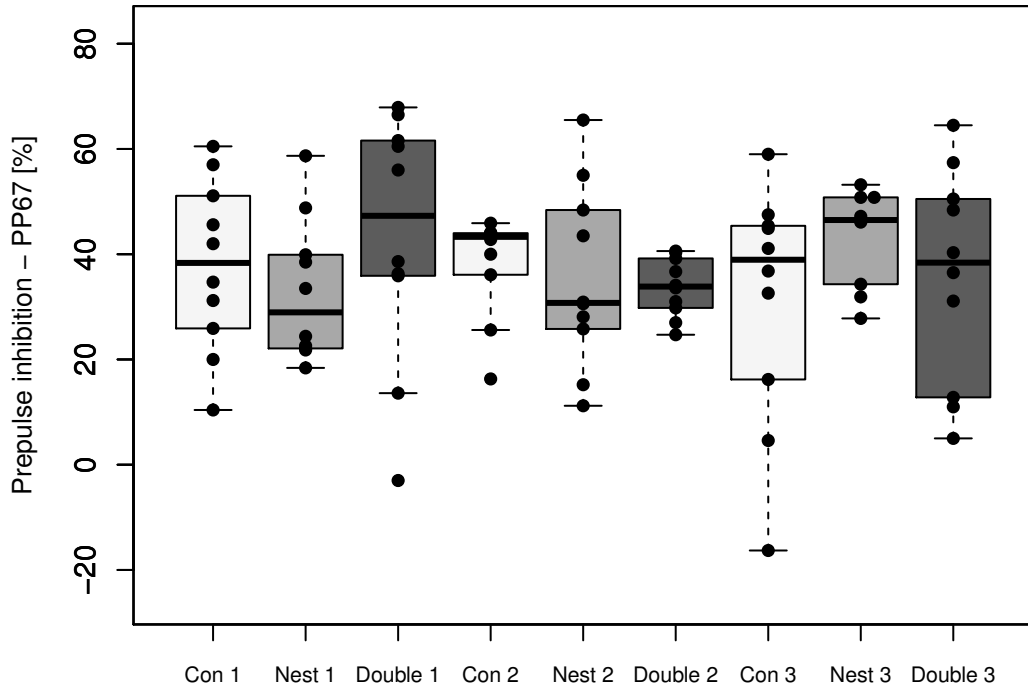**D2 female**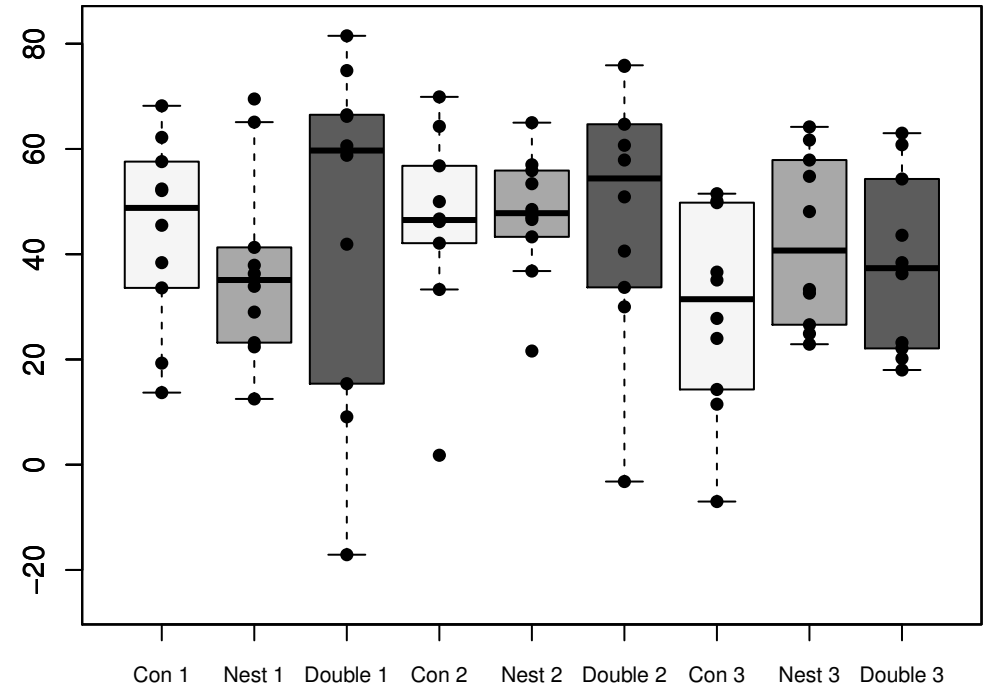**B6 male**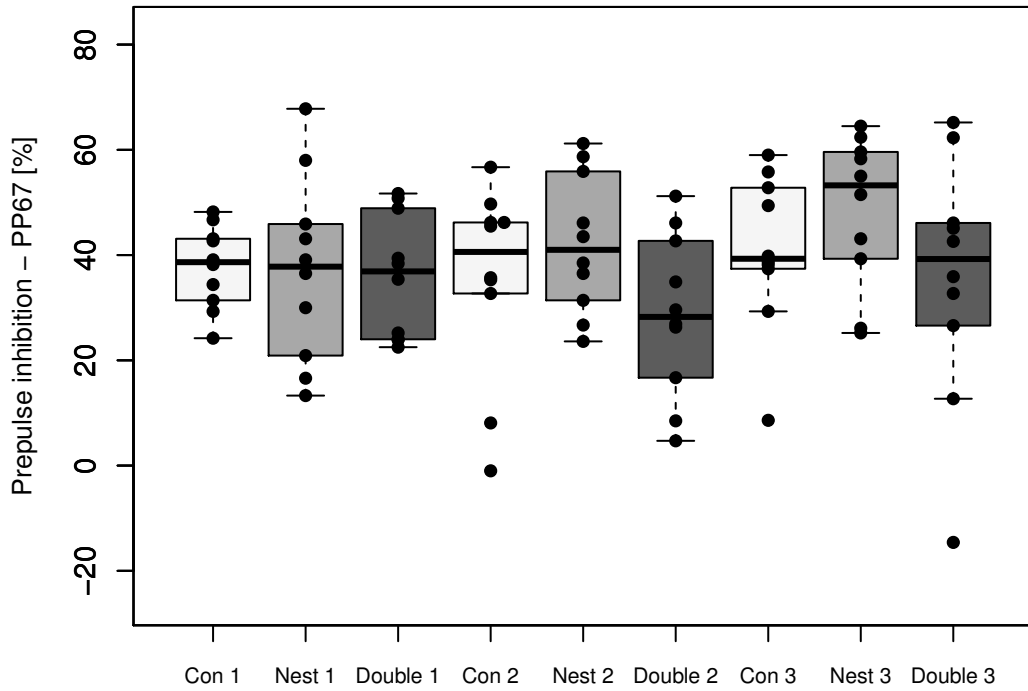**D2 male**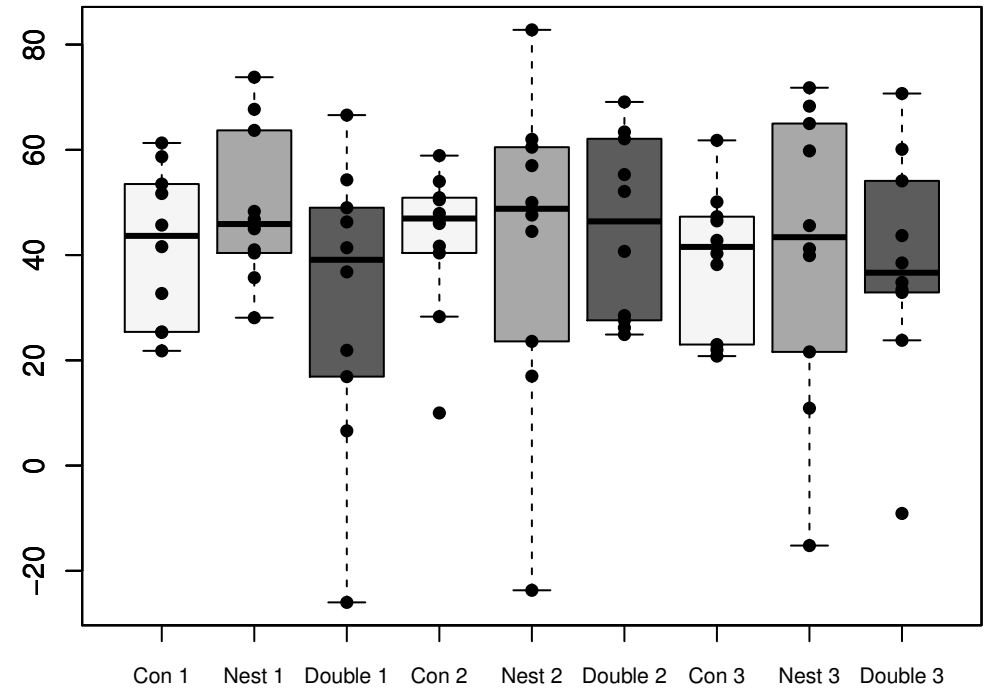

**B6 female**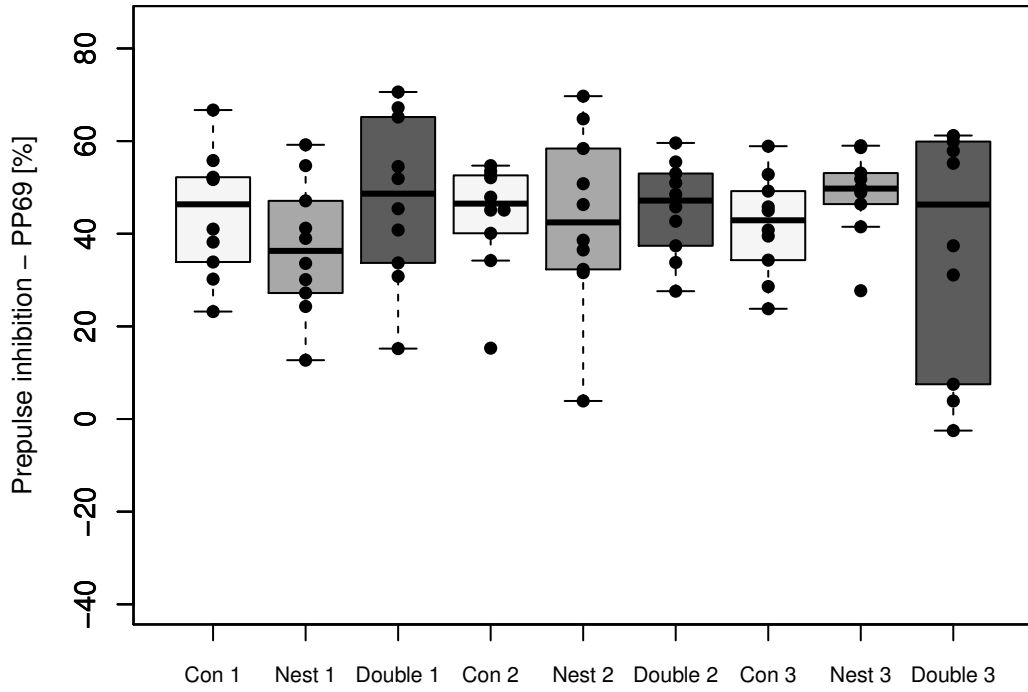**D2 female**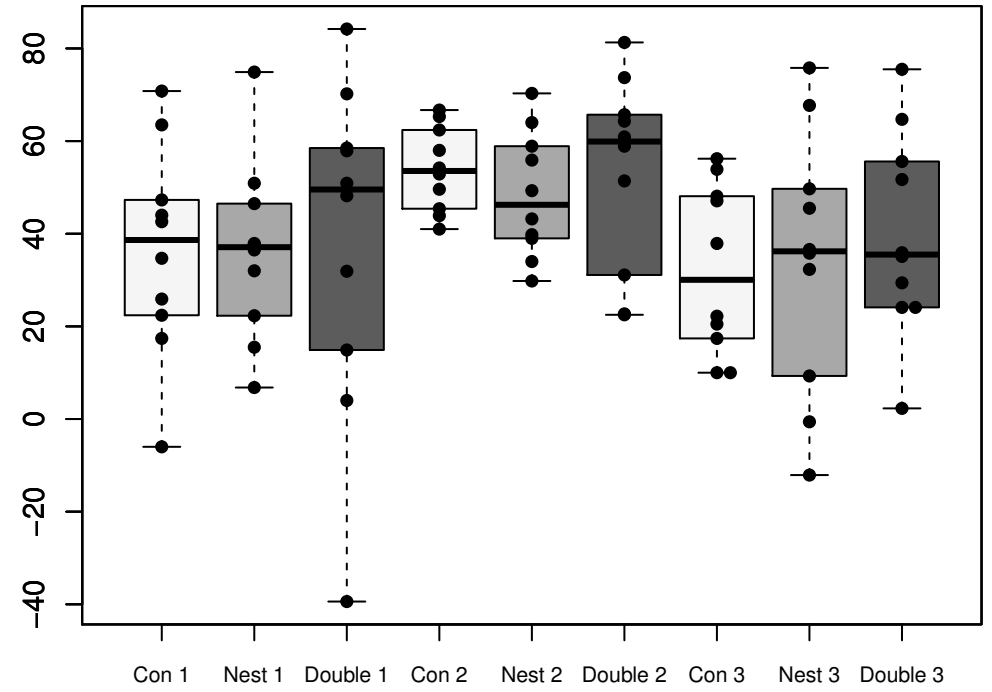**B6 male**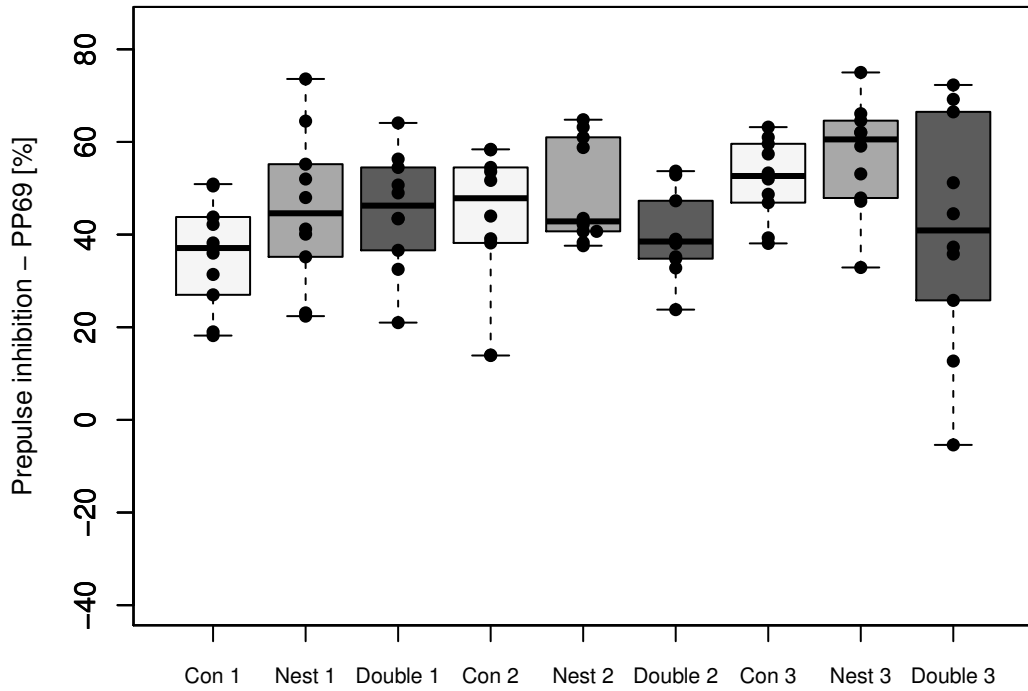**D2 male**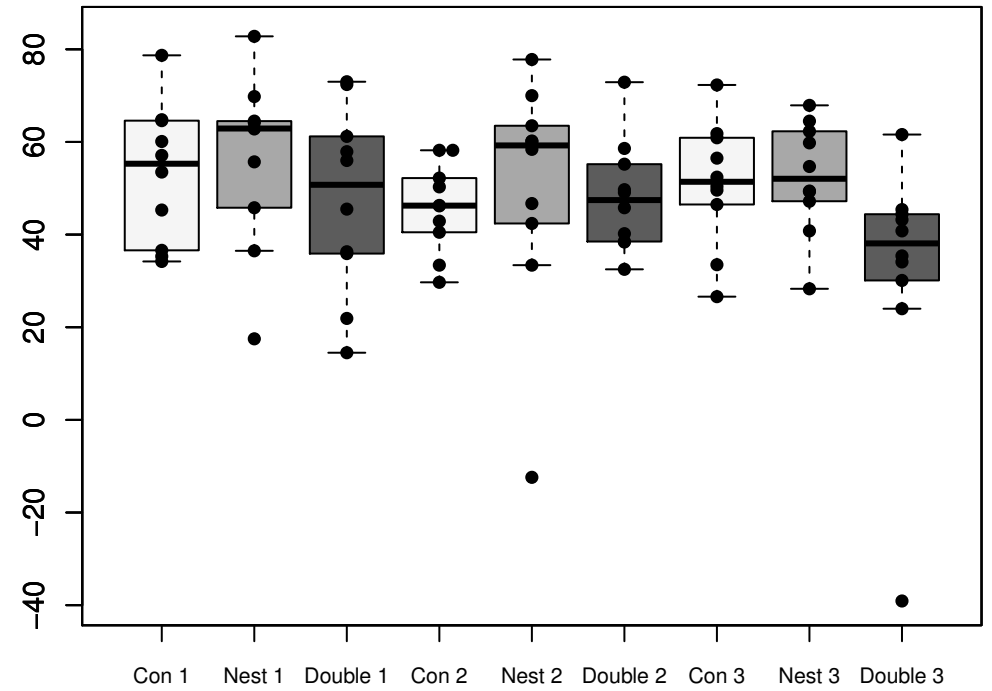

**B6 female**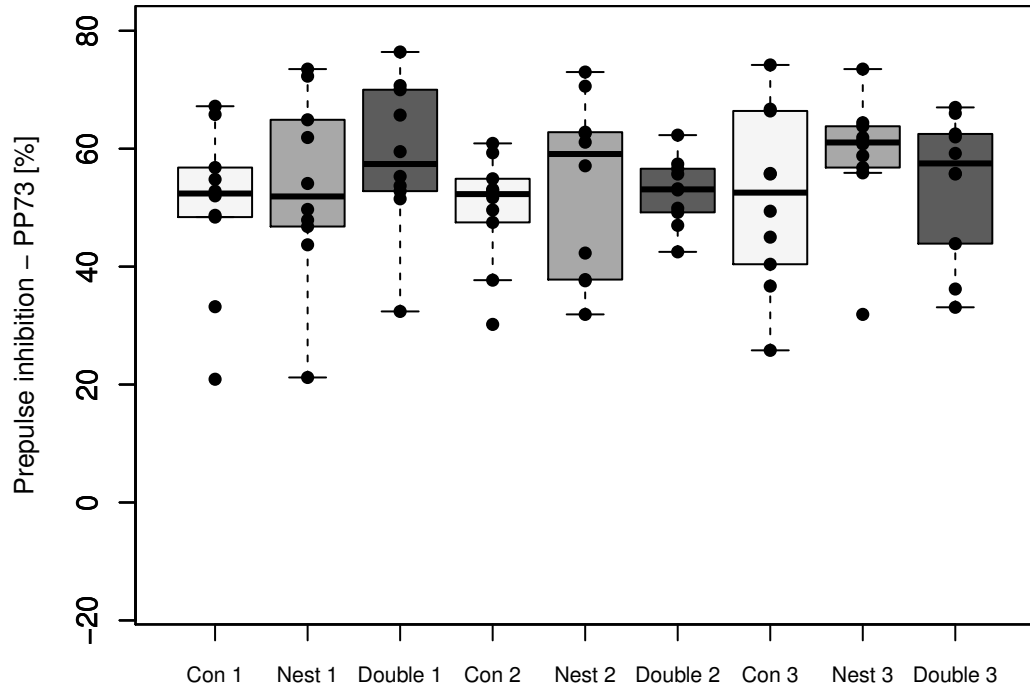**D2 female**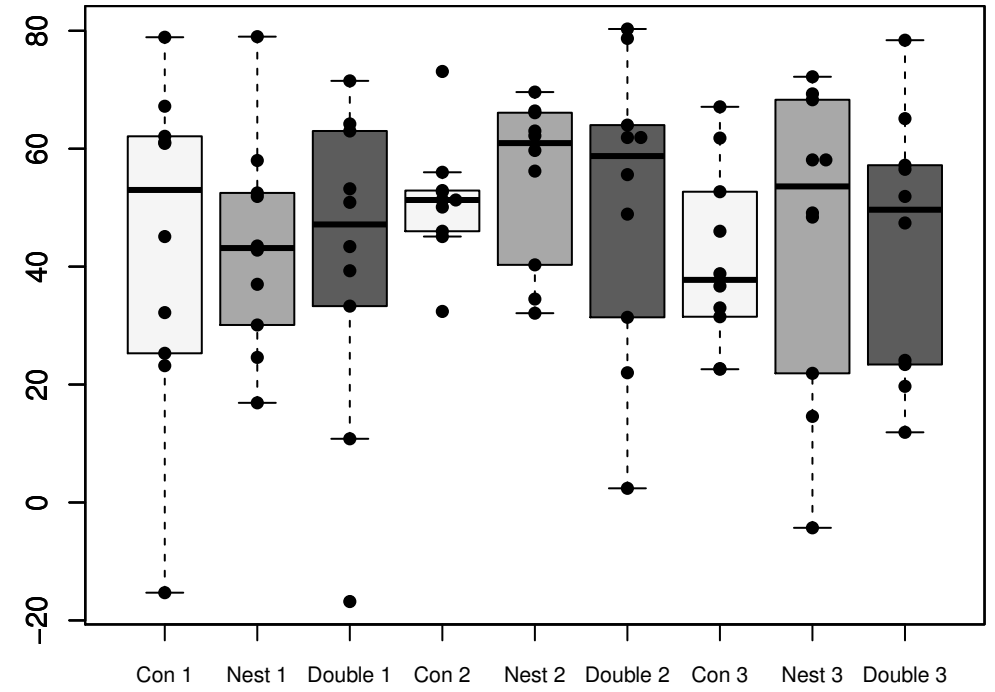**B6 male**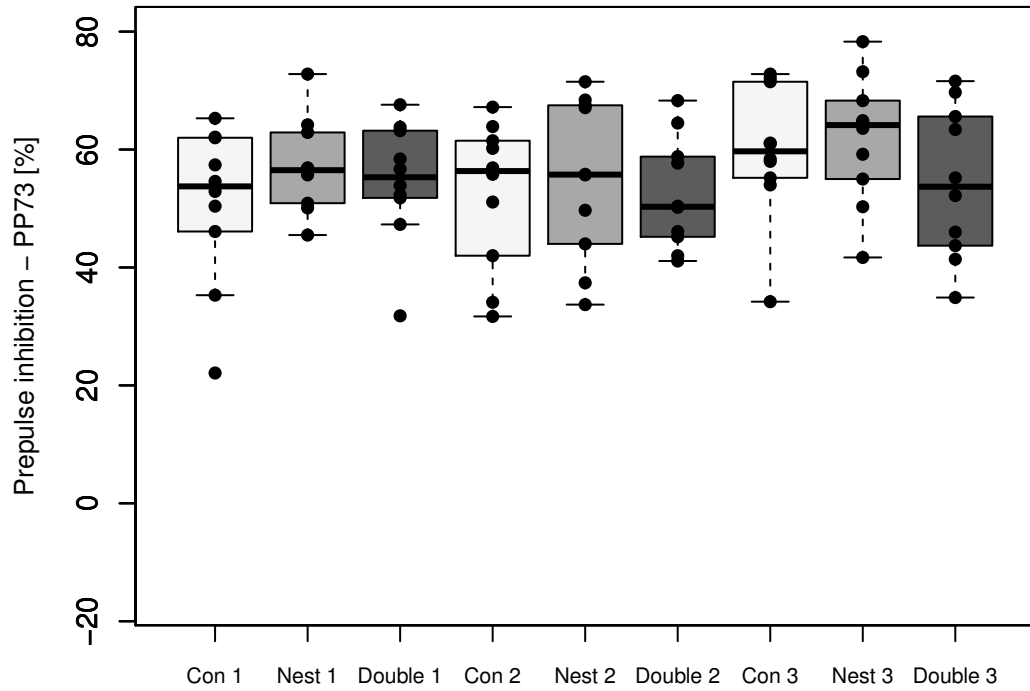**D2 male**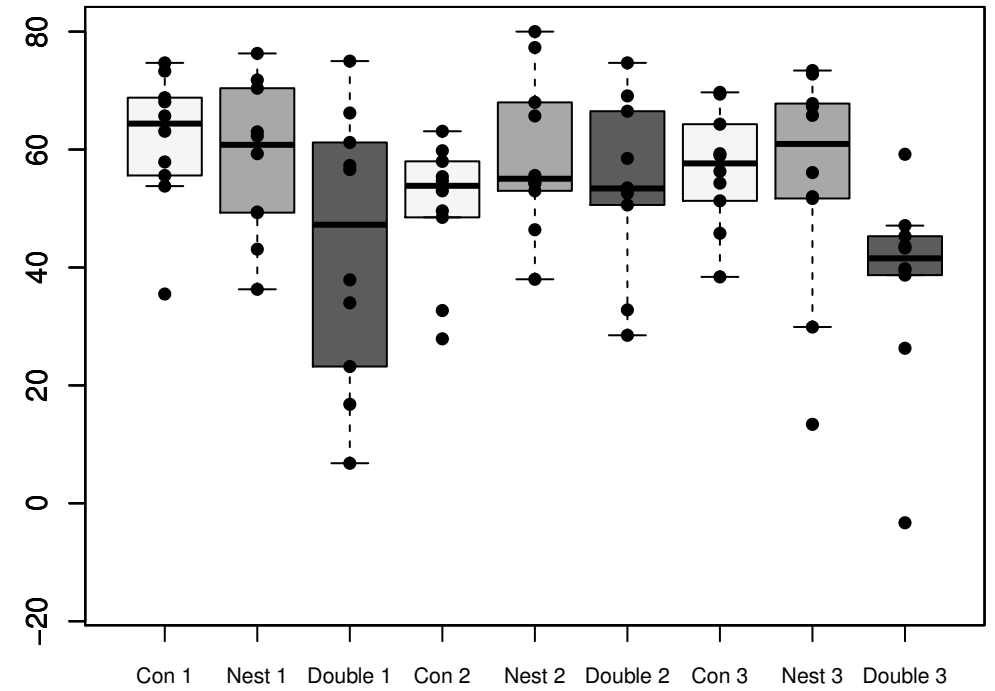

**B6 female**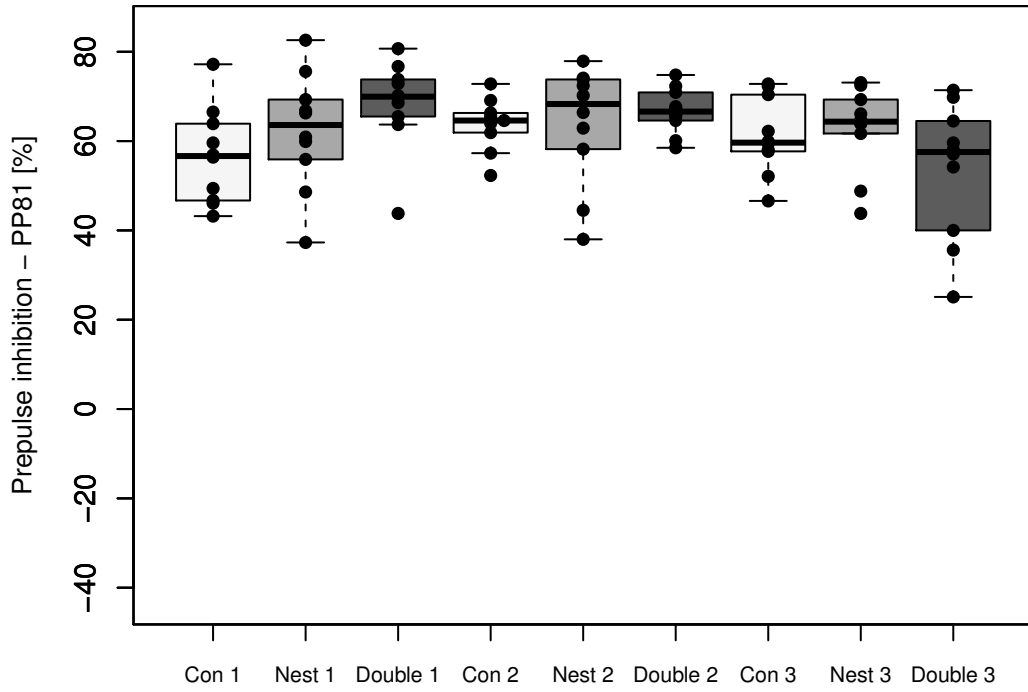**D2 female**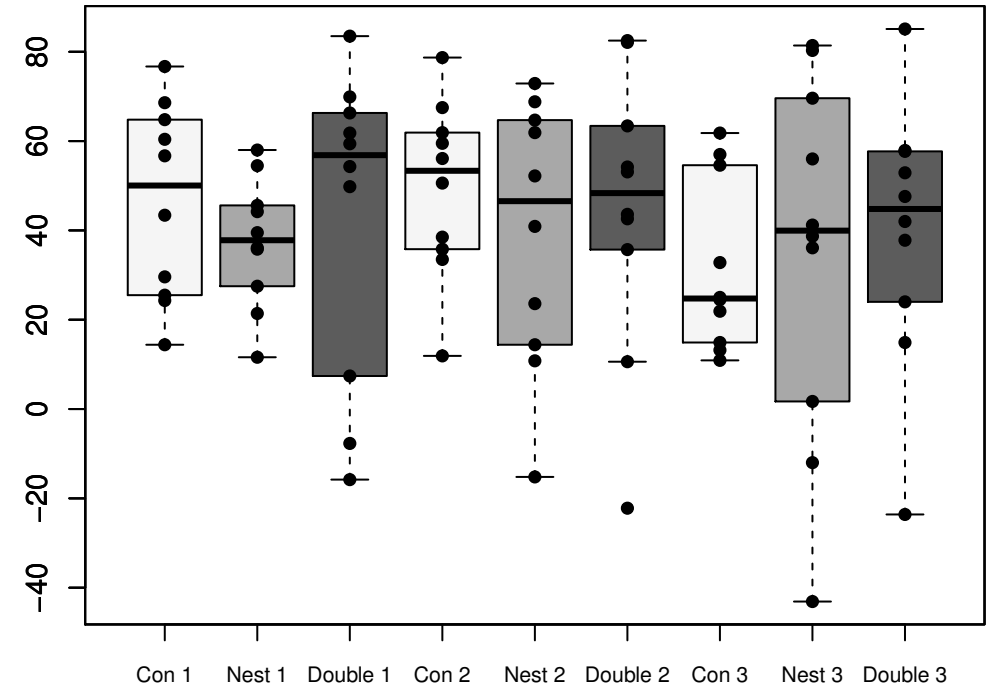**B6 male**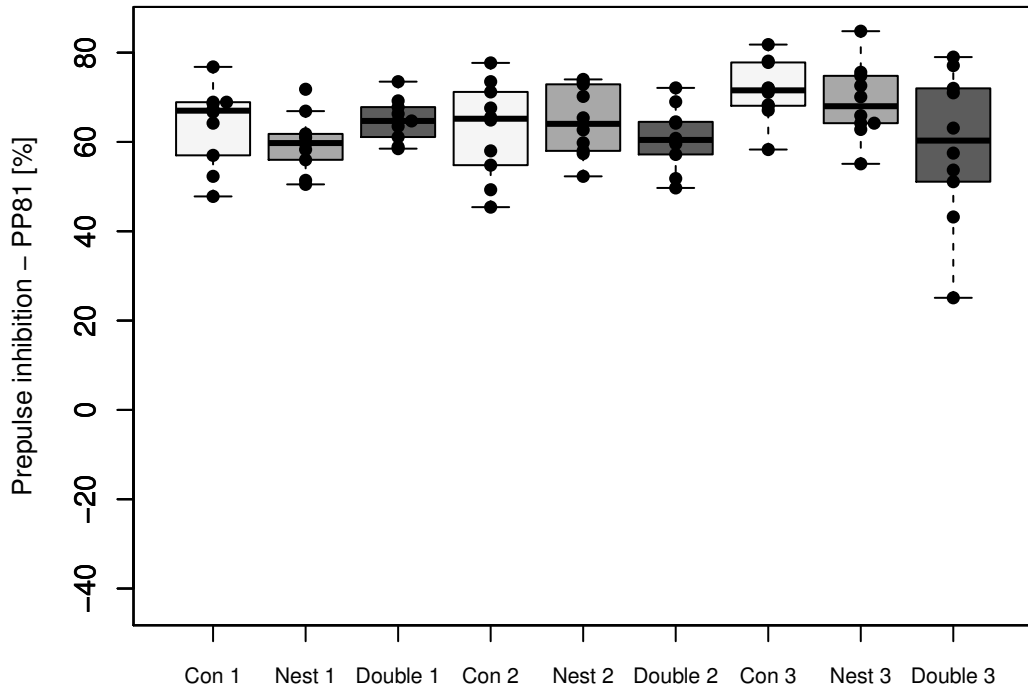**D2 male**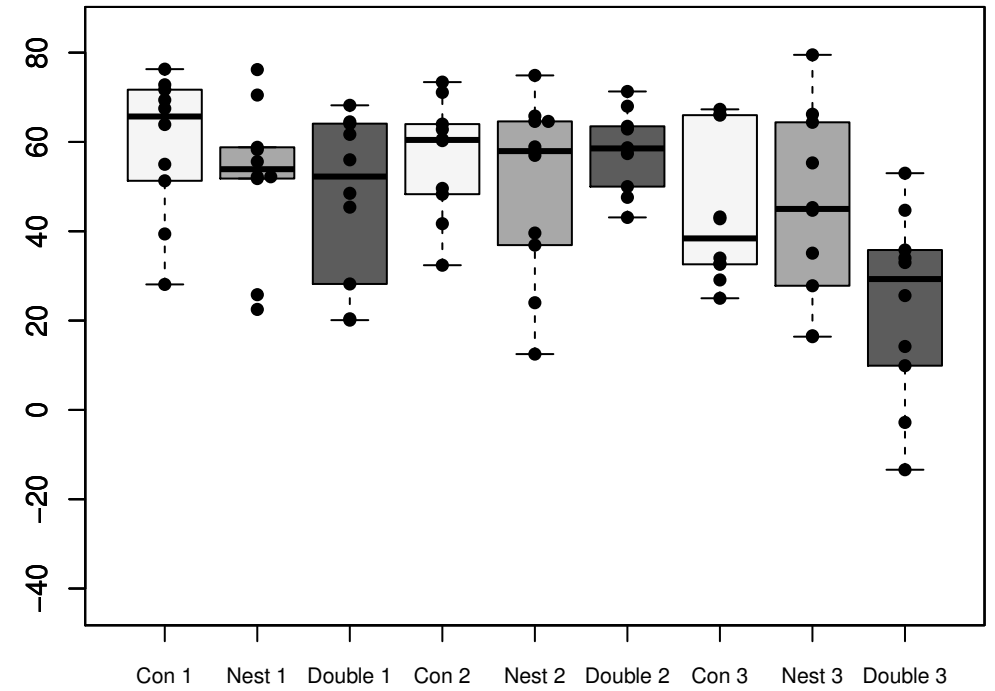



**B6 female**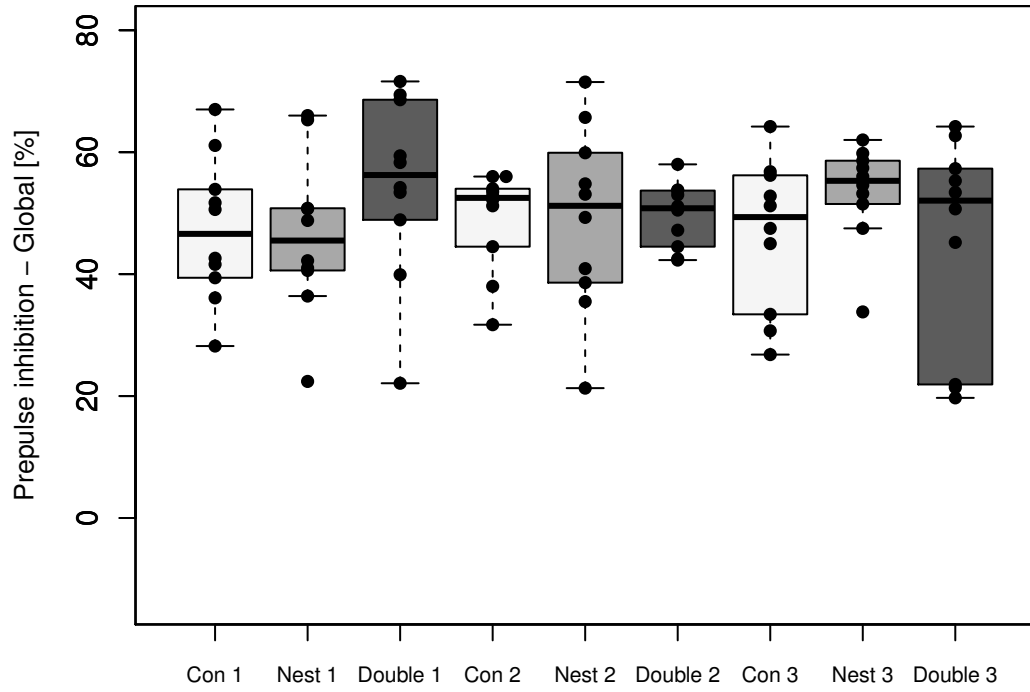**D2 female**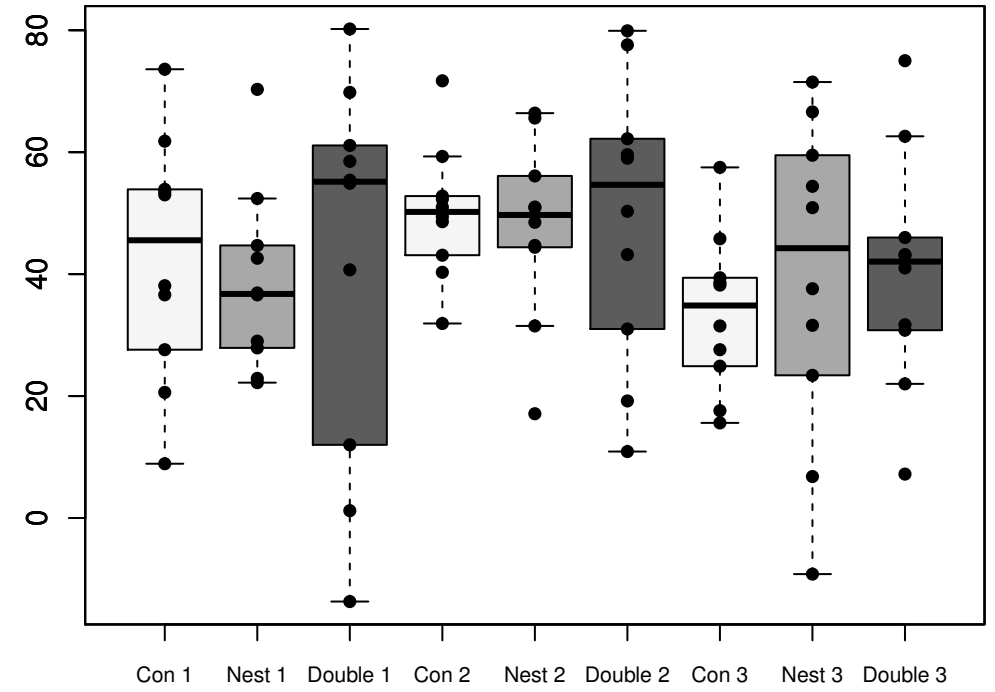**B6 male**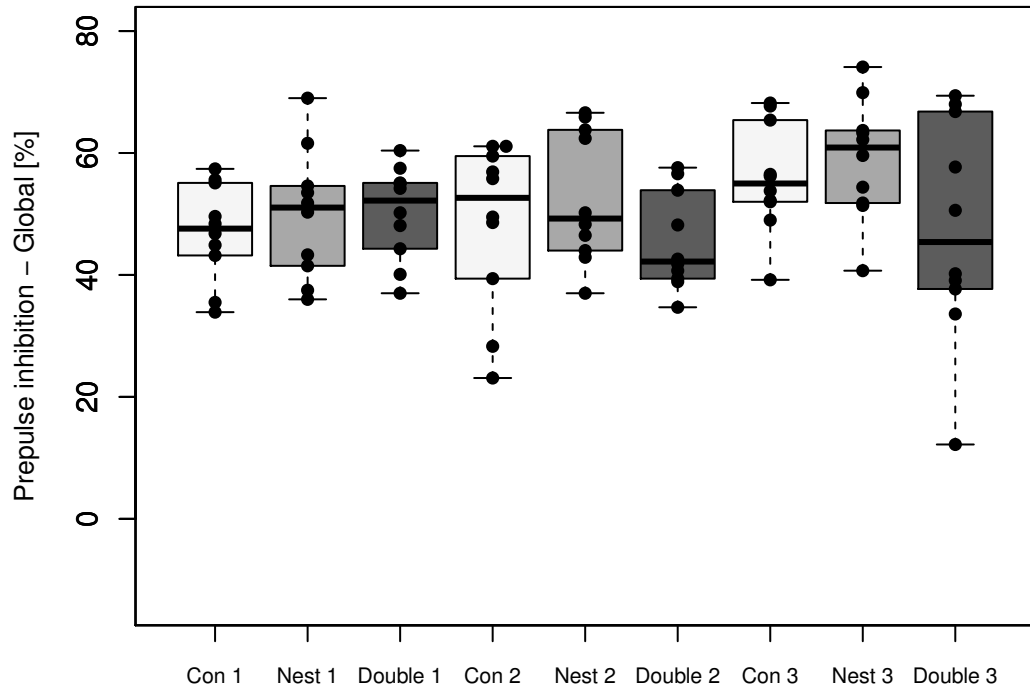**D2 male**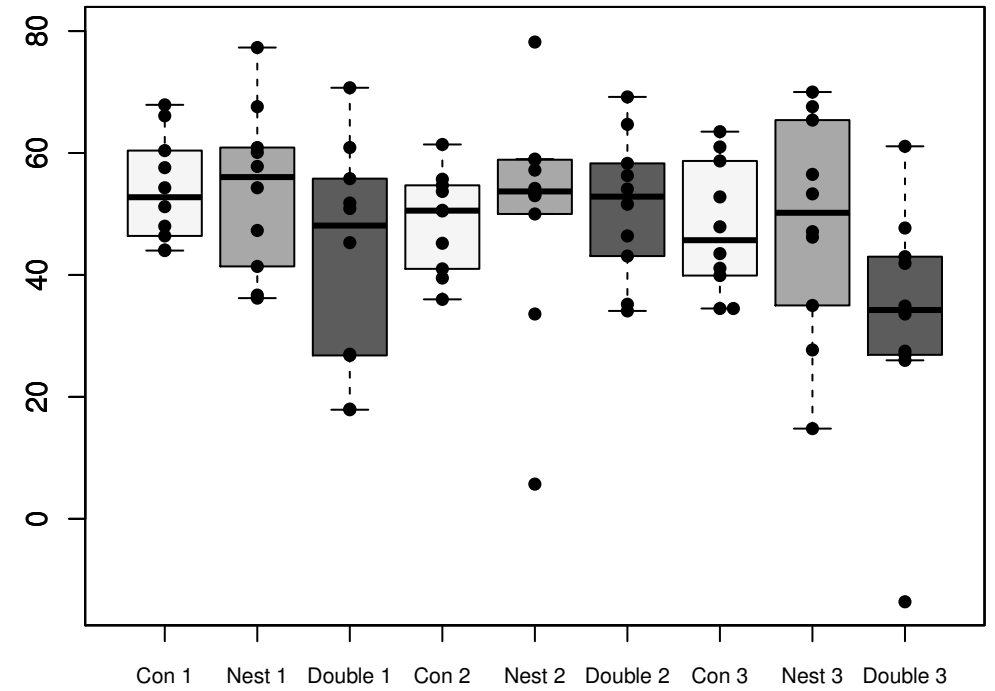

**B6 female**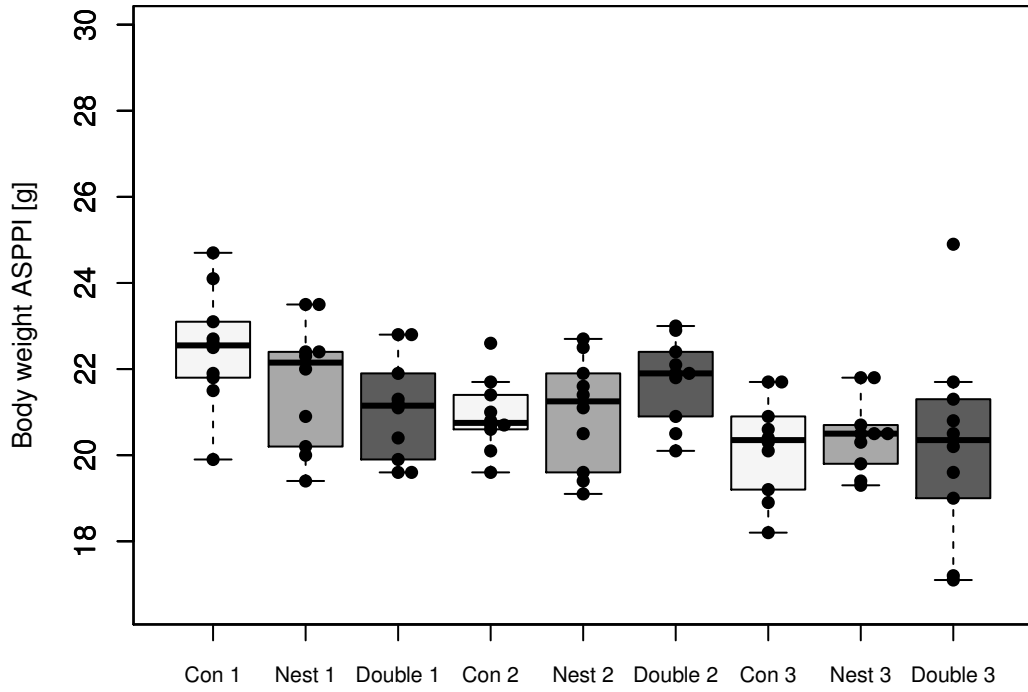**D2 female**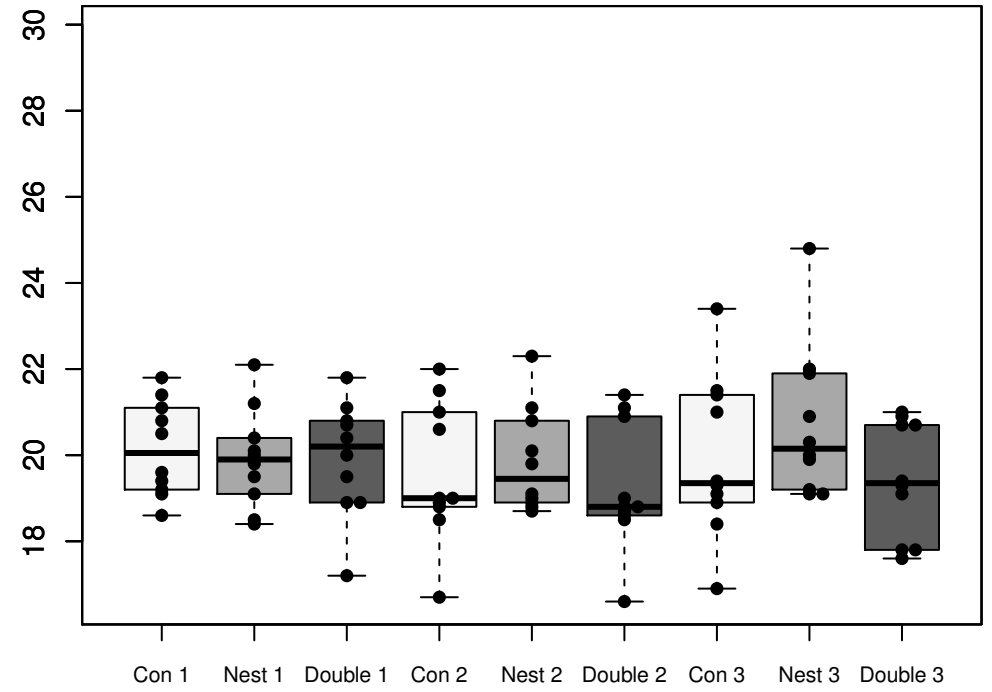**B6 male**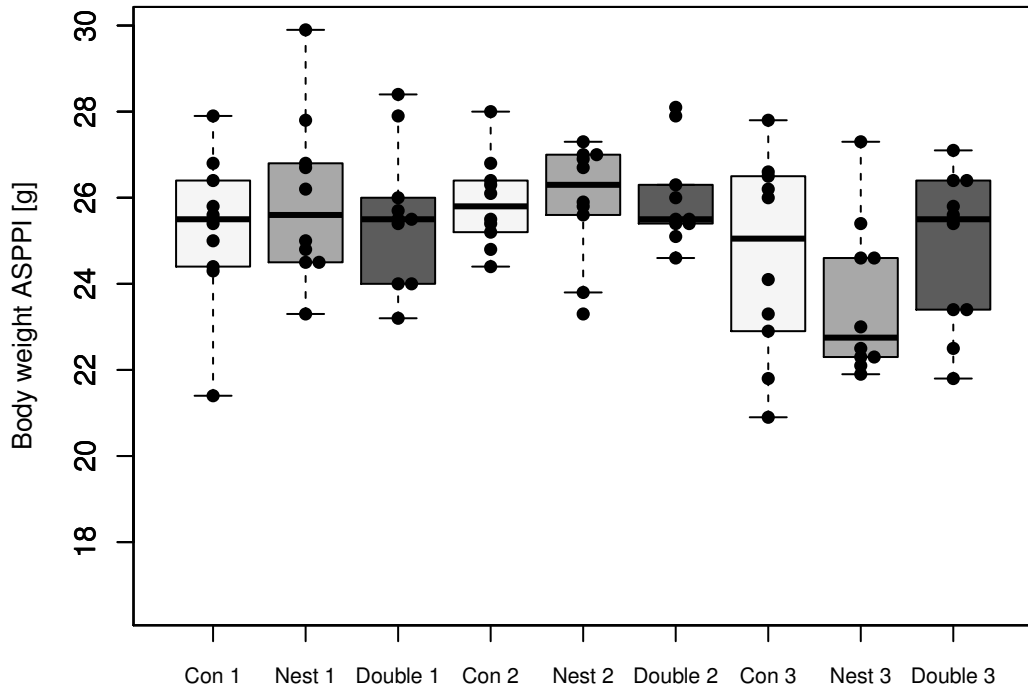**D2 male**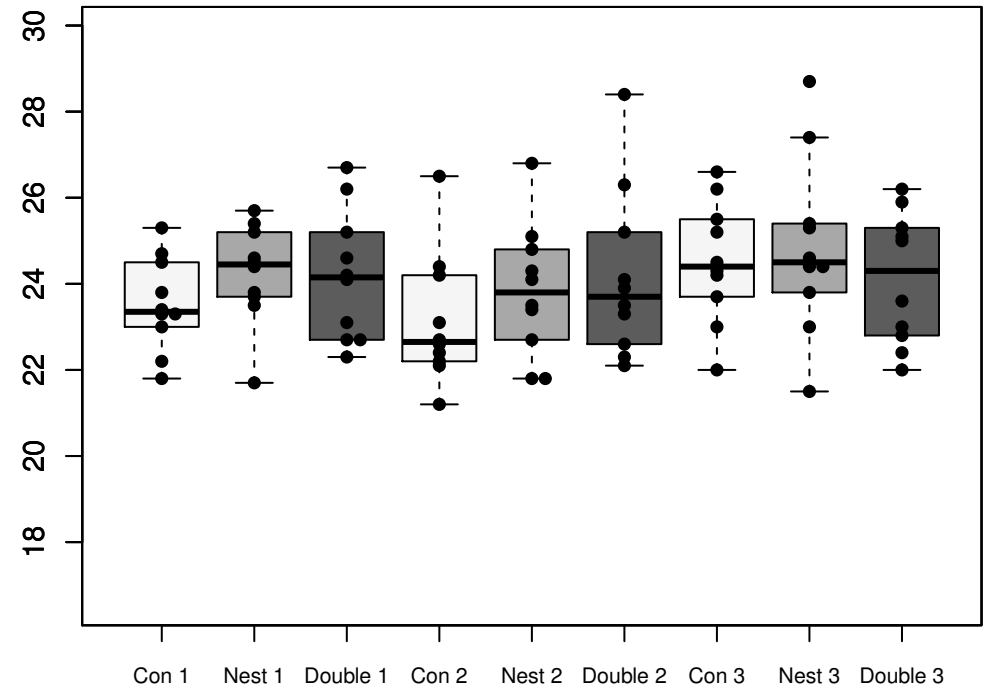

**B6 female**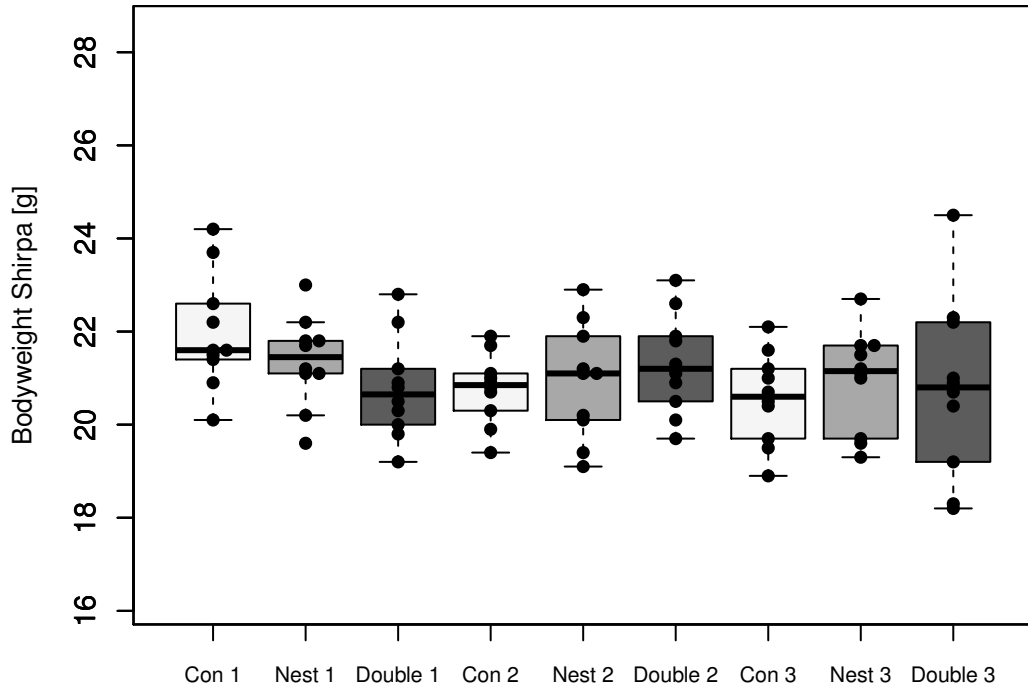**D2 female**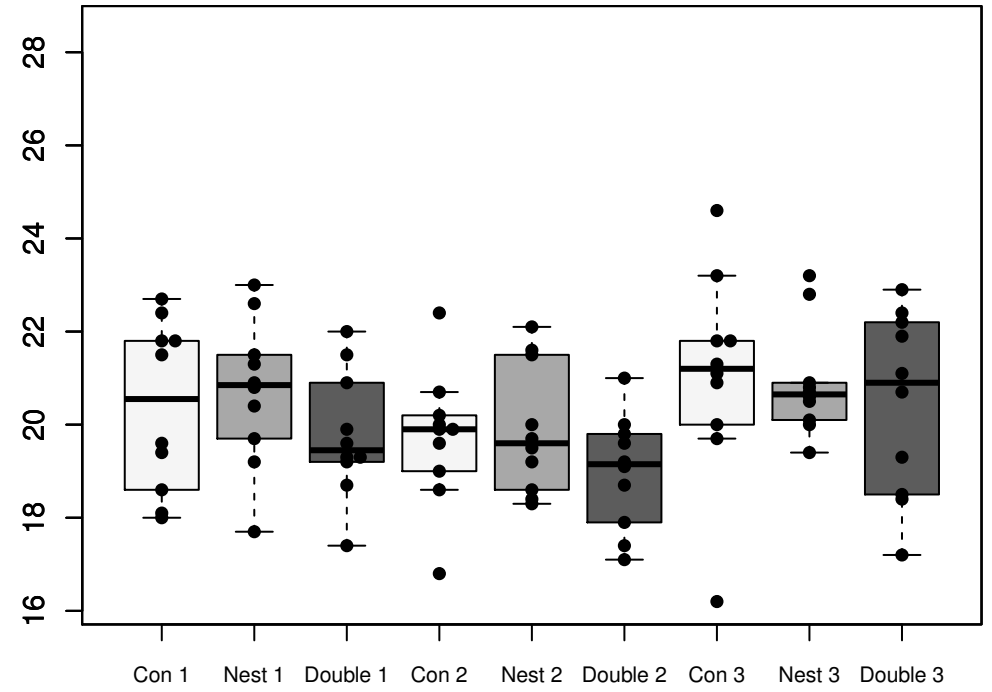**B6 male**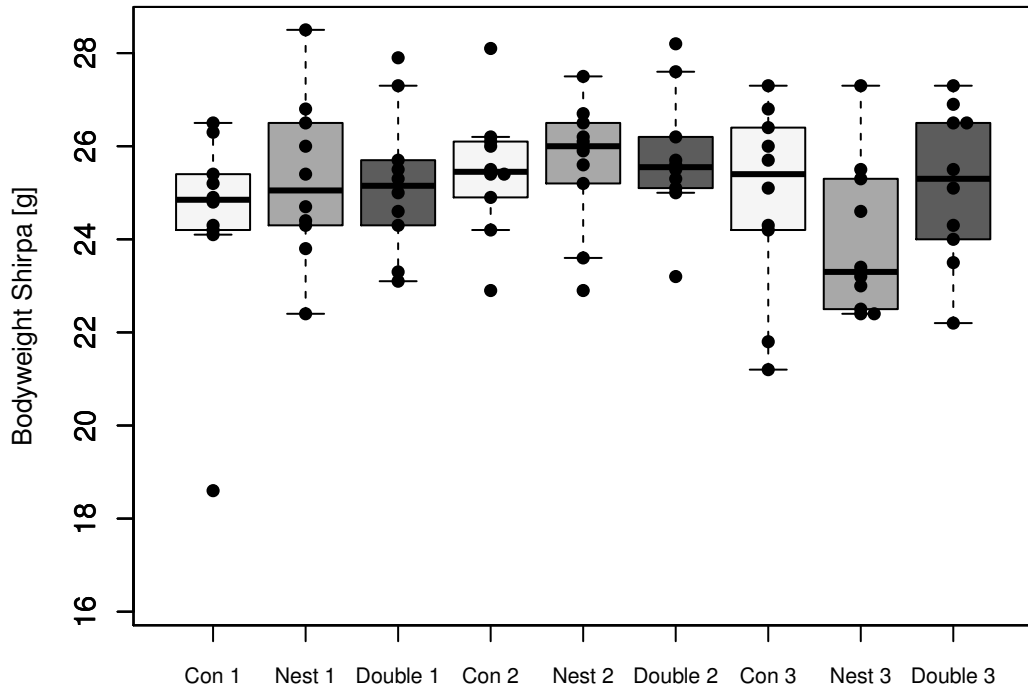**D2 male**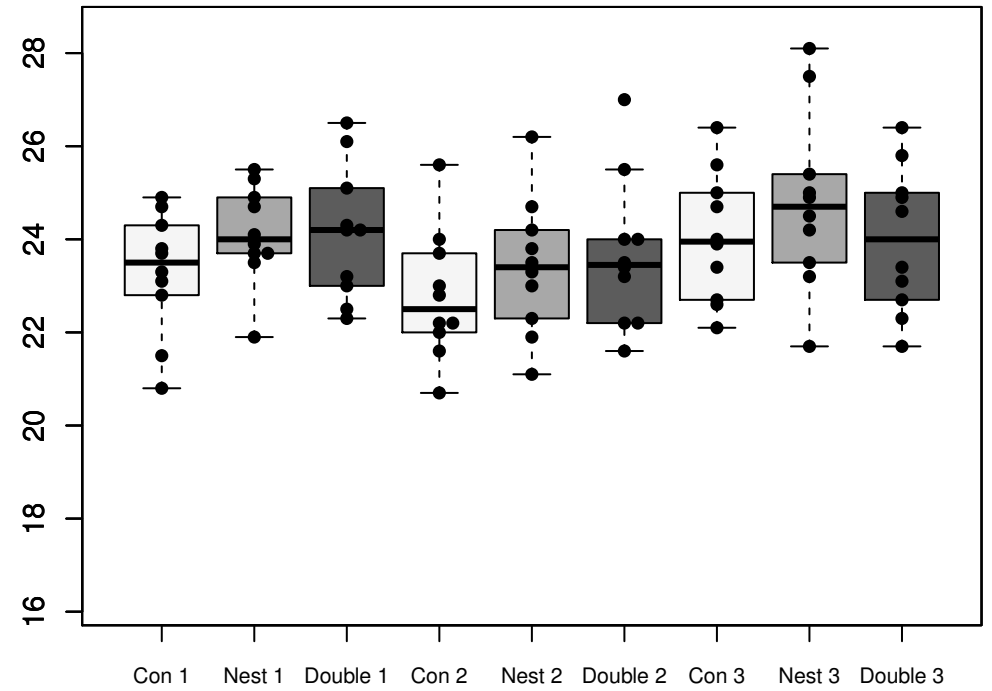

**B6 female**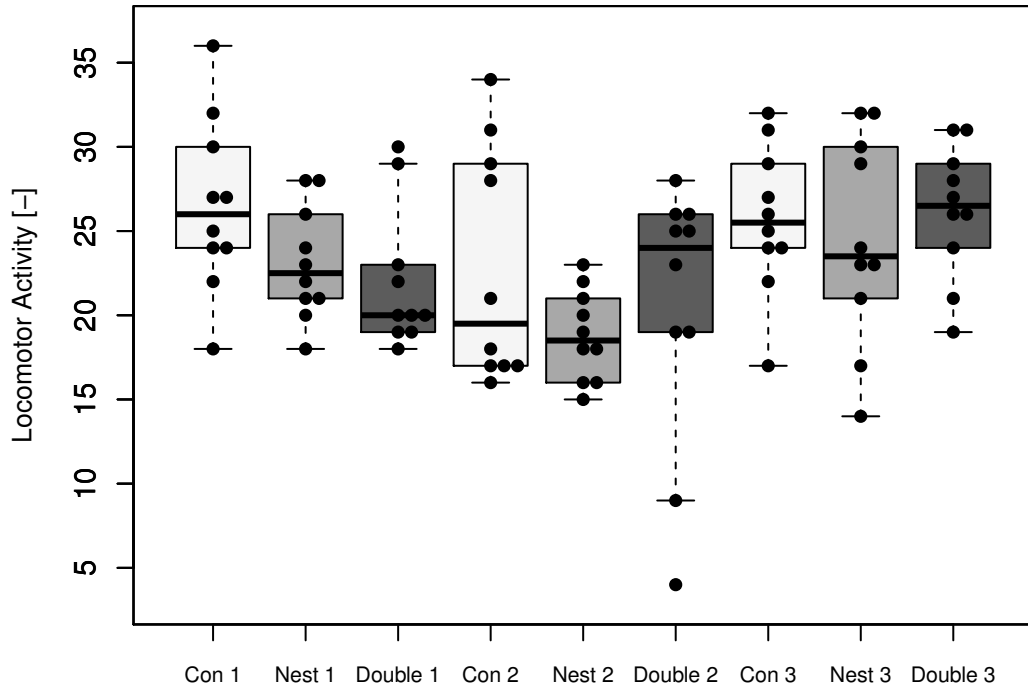**D2 female**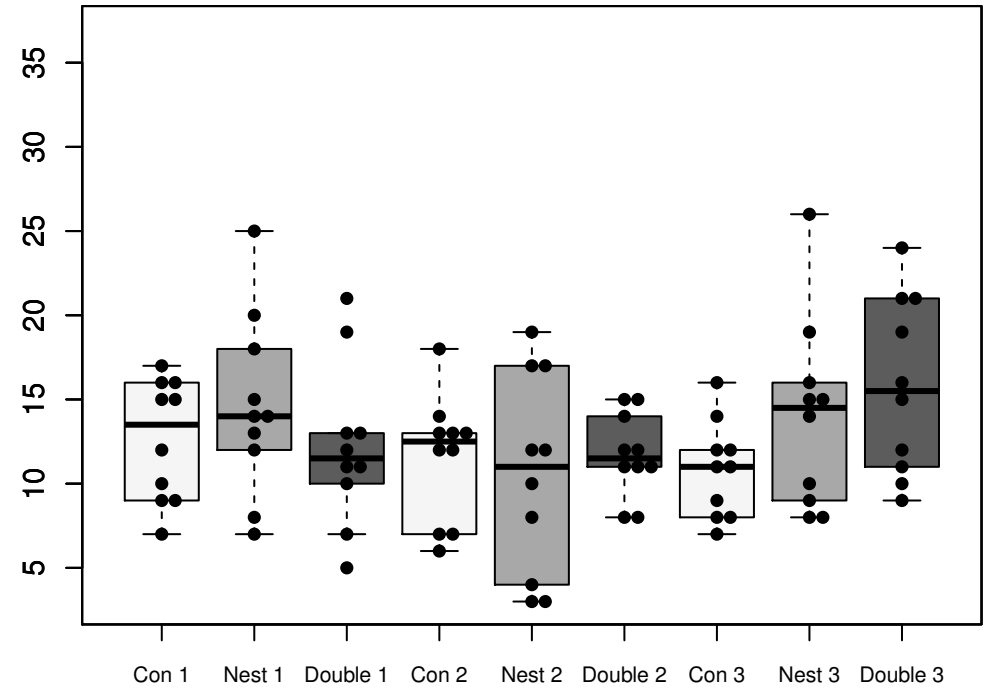**B6 male**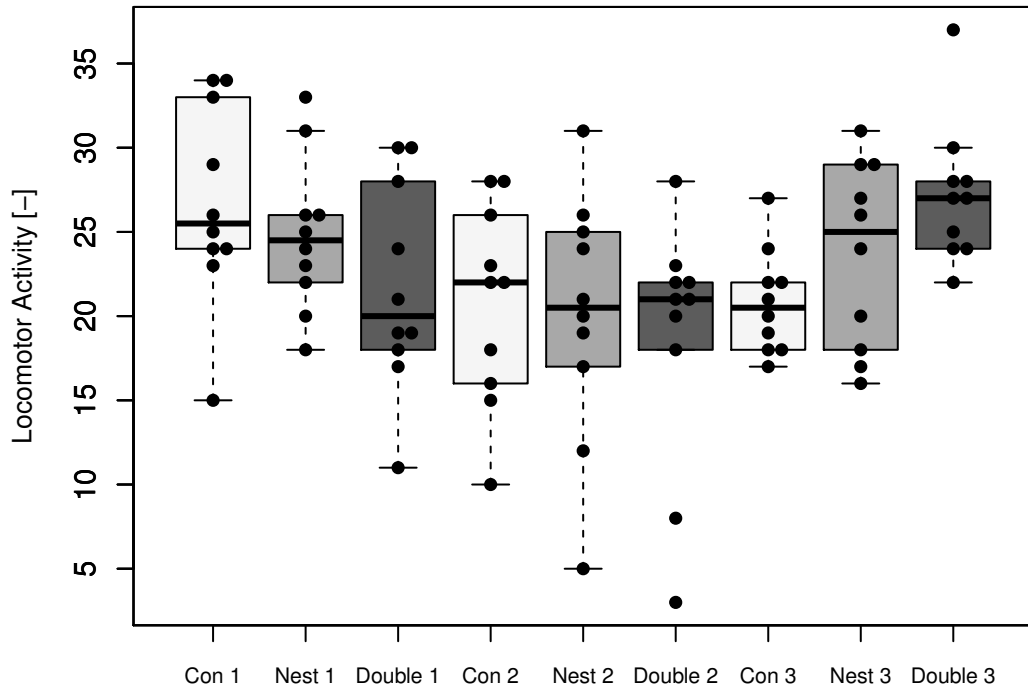**D2 male**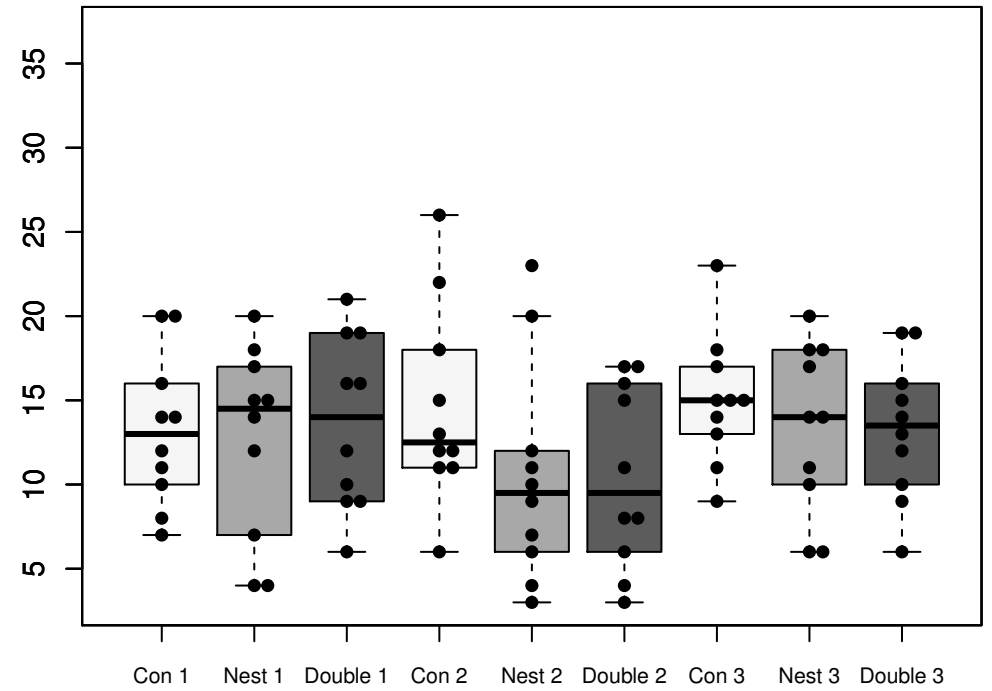

**B6 female**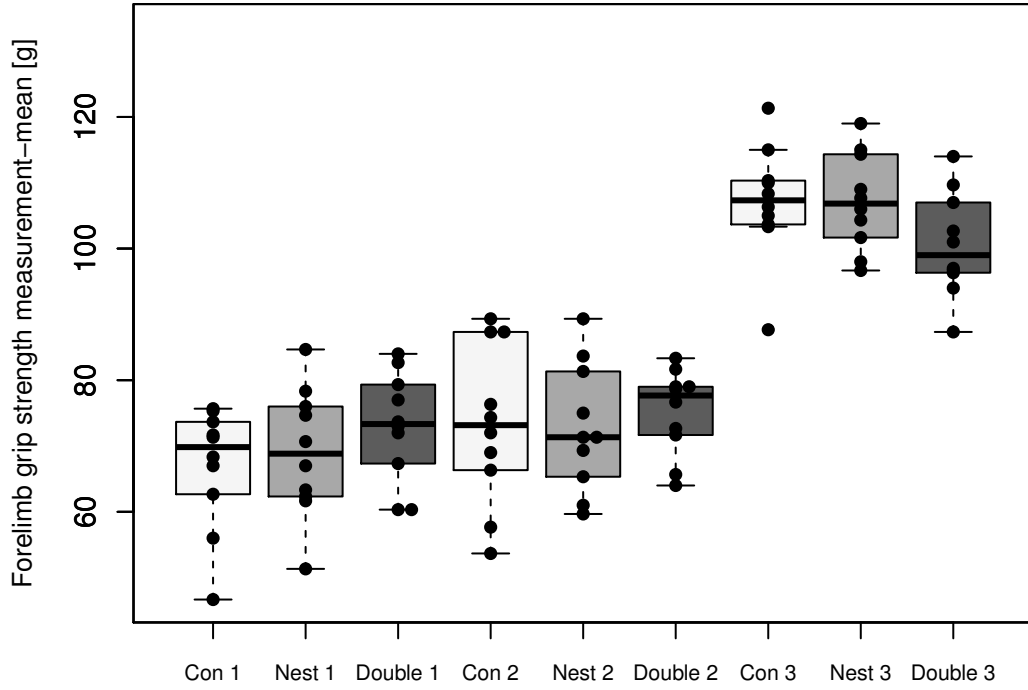**D2 female**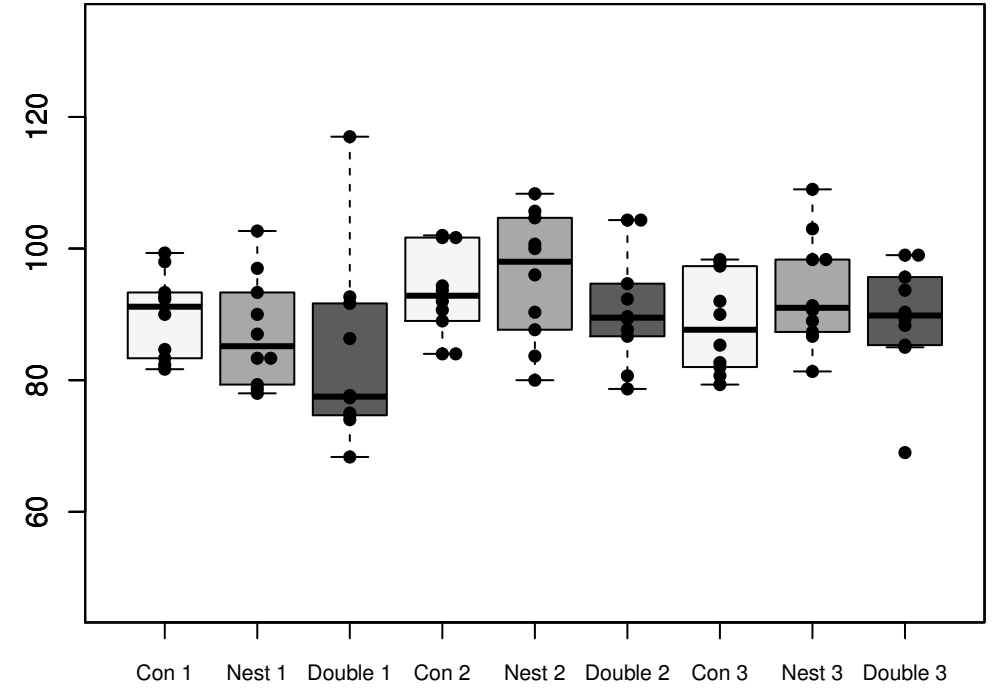**B6 male**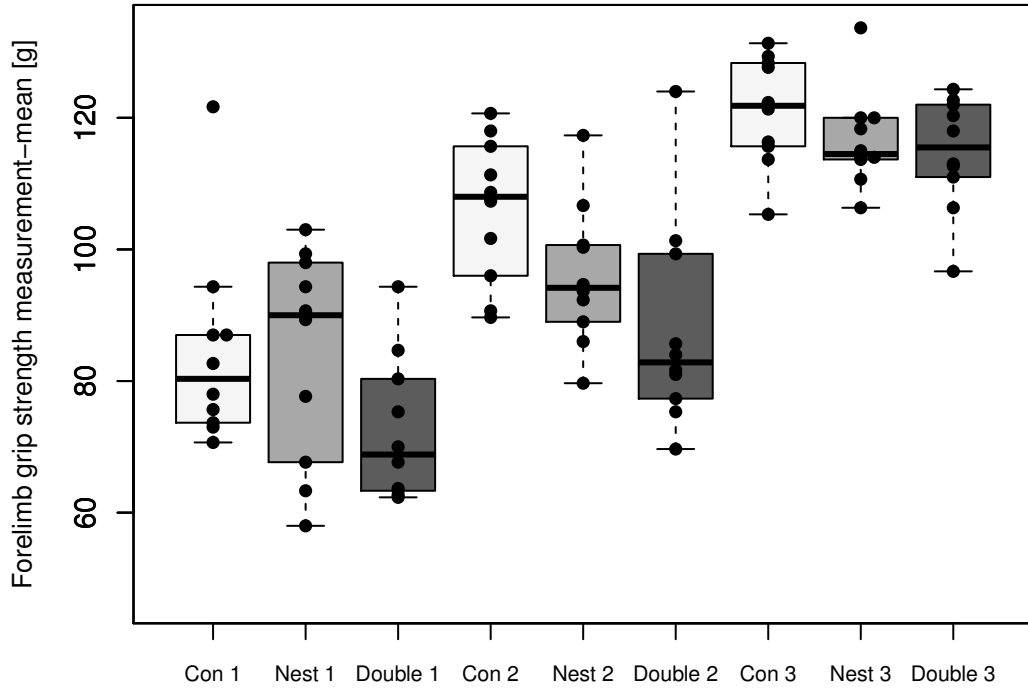**D2 male**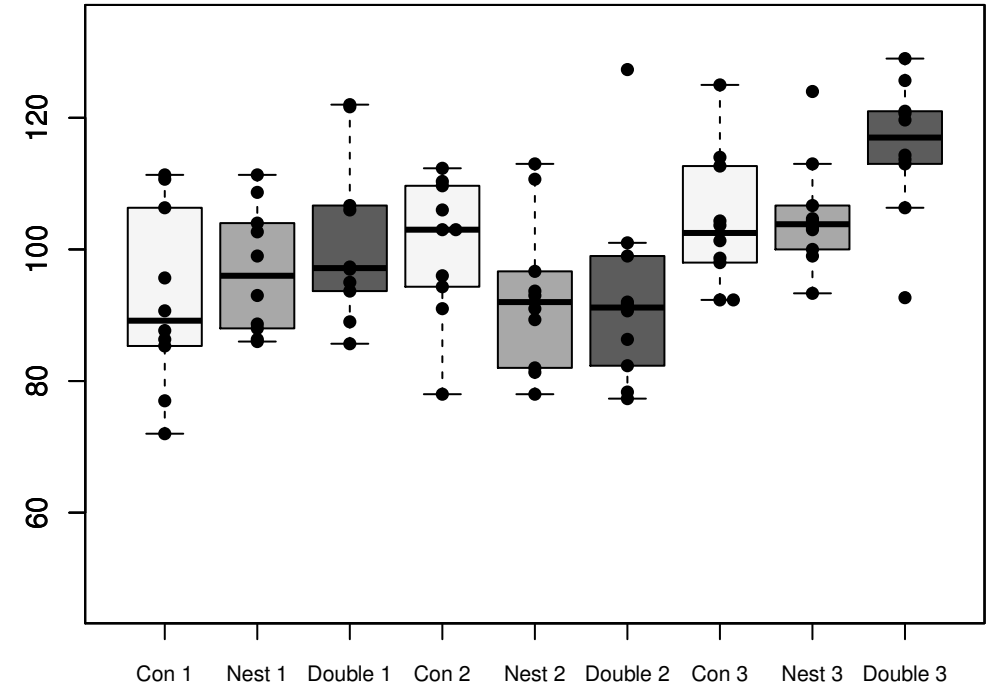

**B6 female**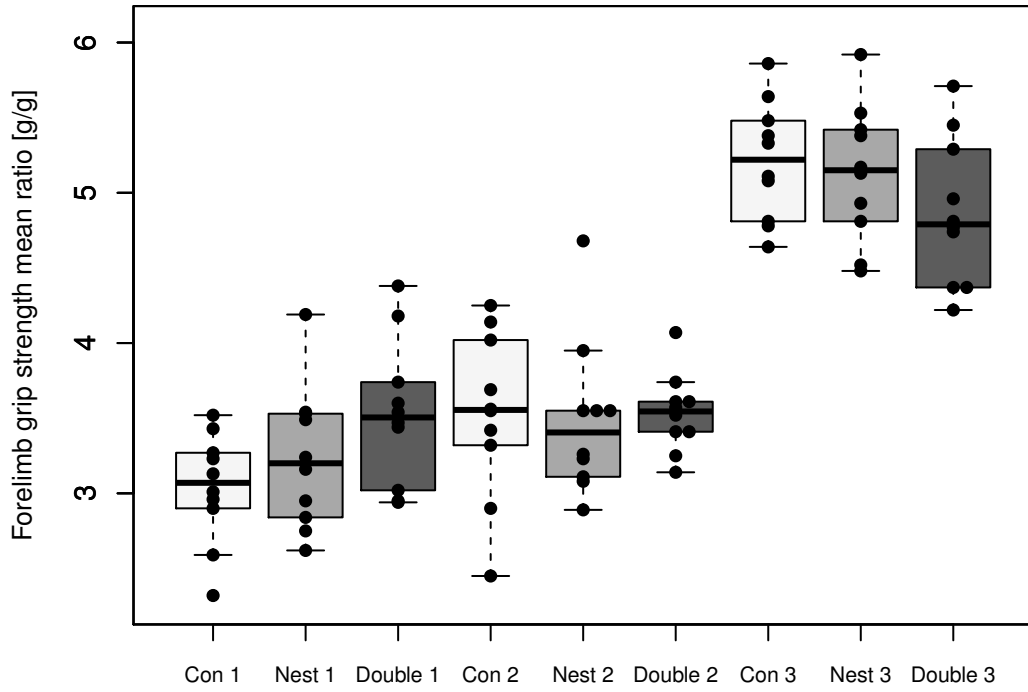**D2 female**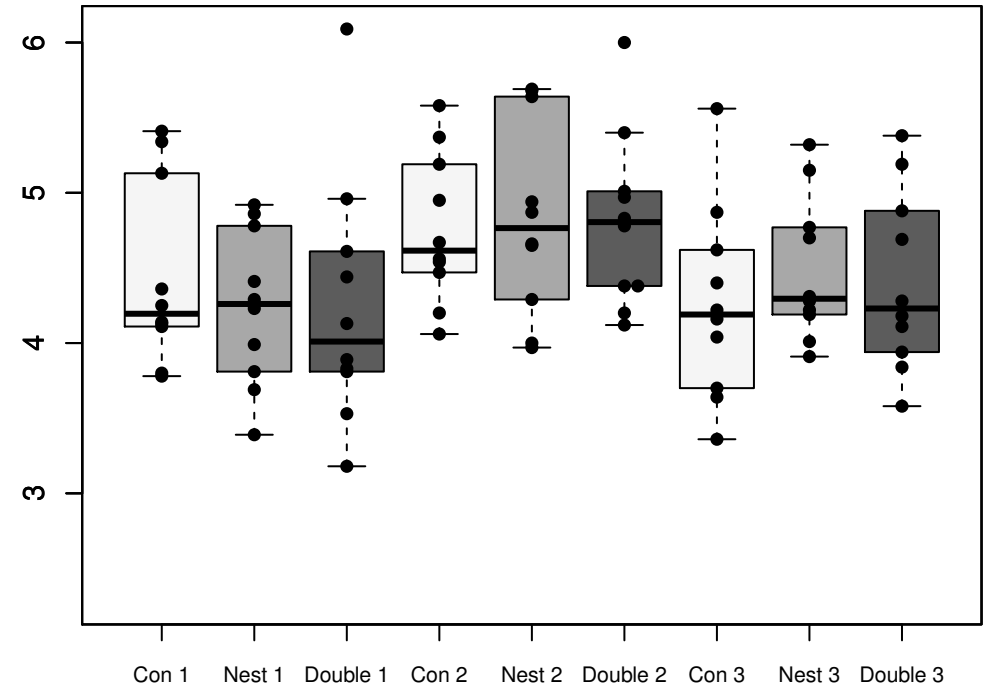**B6 male**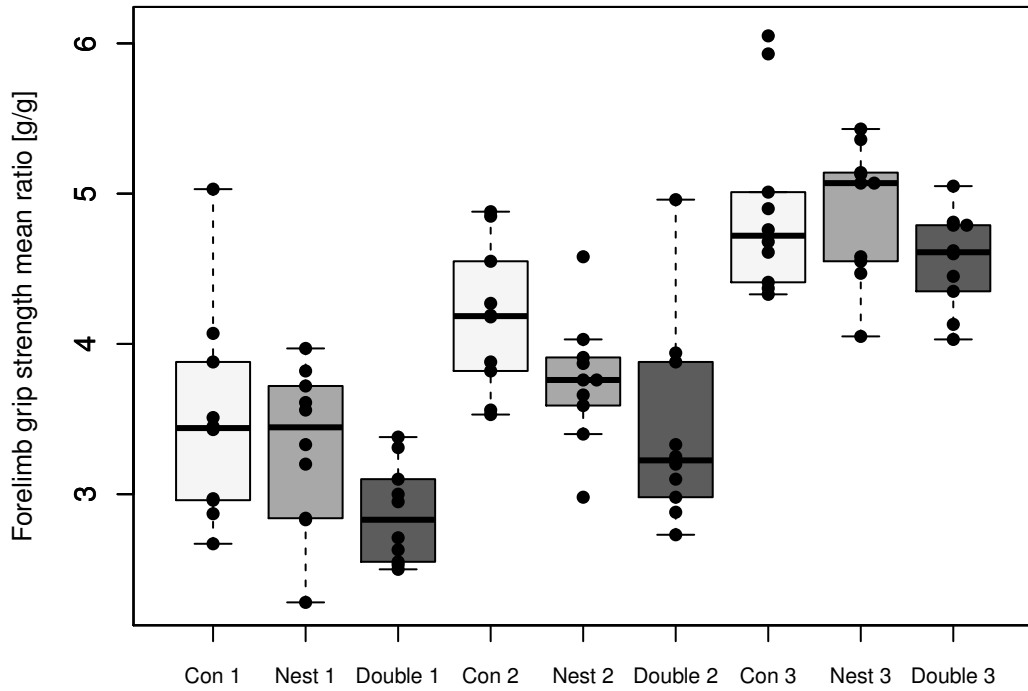**D2 male**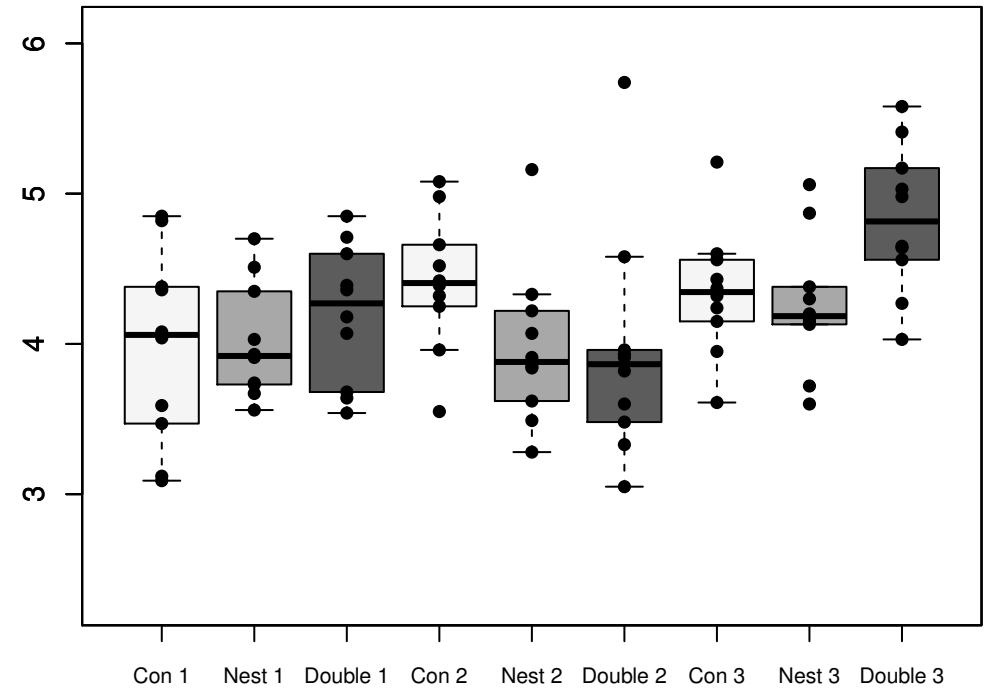

Forelimb and hindlimb grip strength measurement—mean [g]

**B6 female**

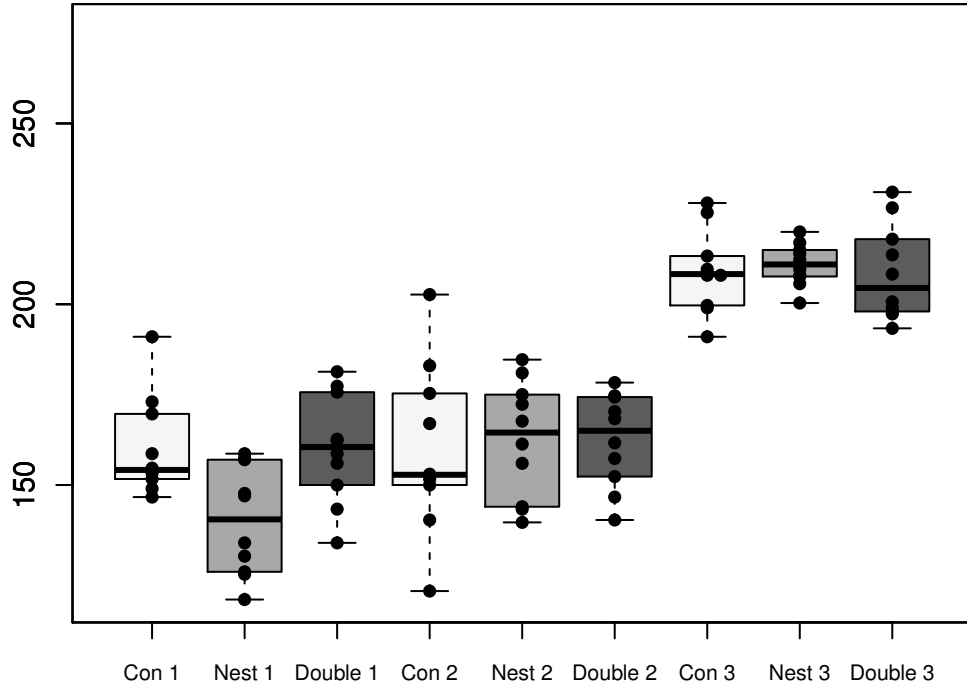

**D2 female**

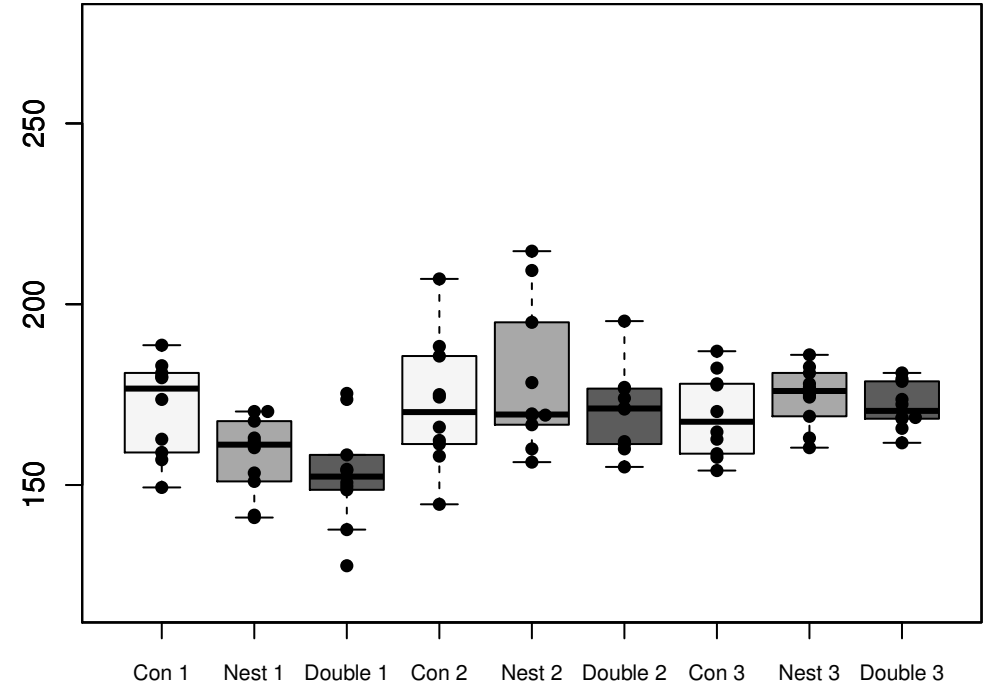

Forelimb and hindlimb grip strength measurement—mean [g]

**B6 male**

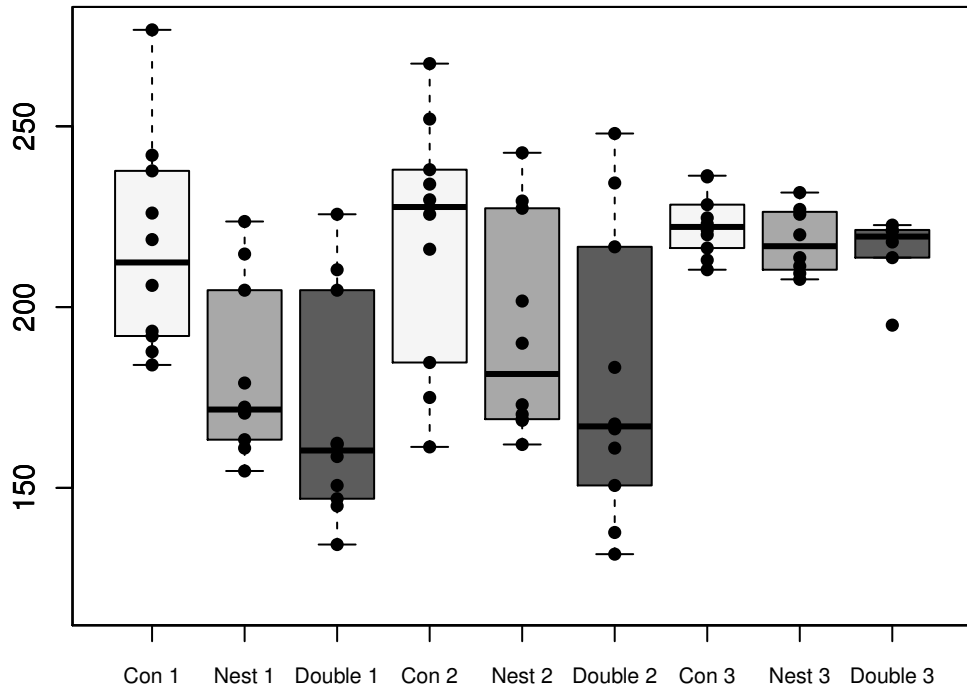

**D2 male**

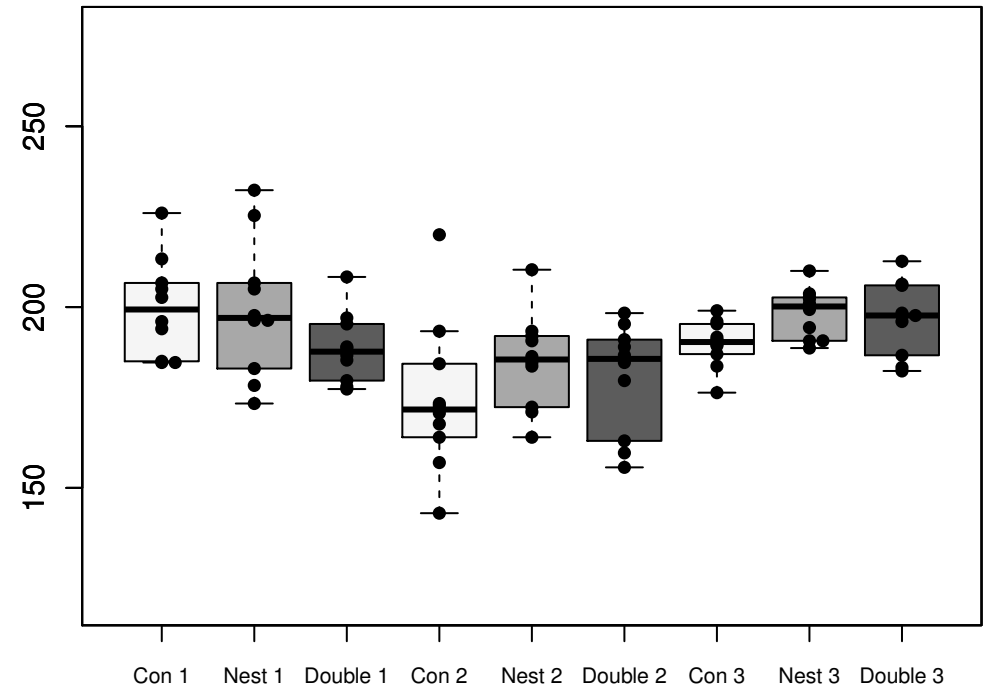

**B6 female**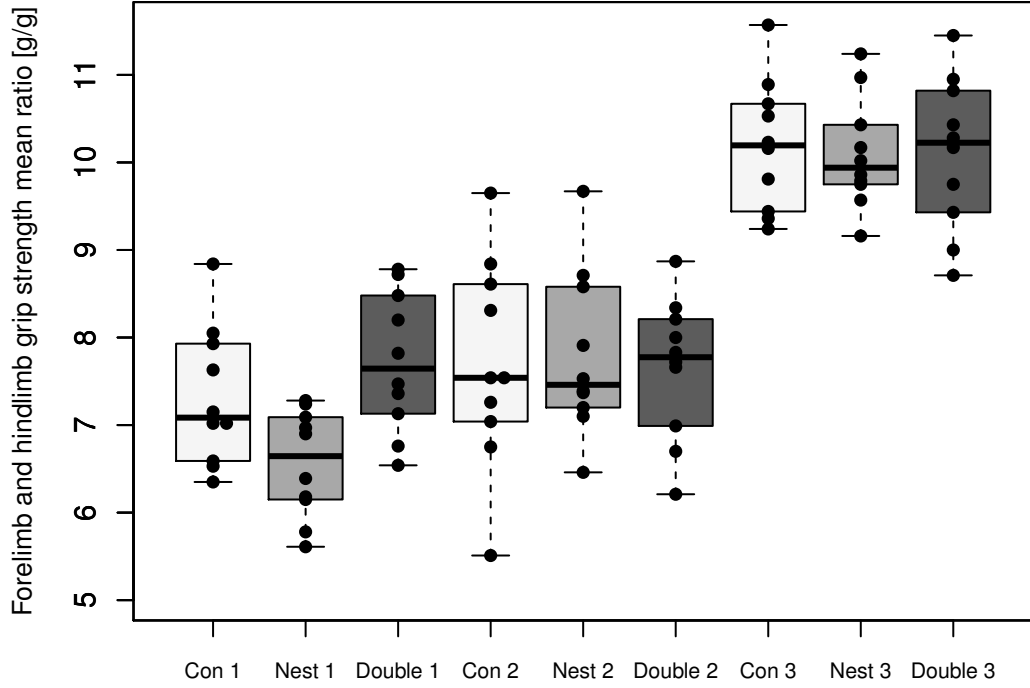**D2 female**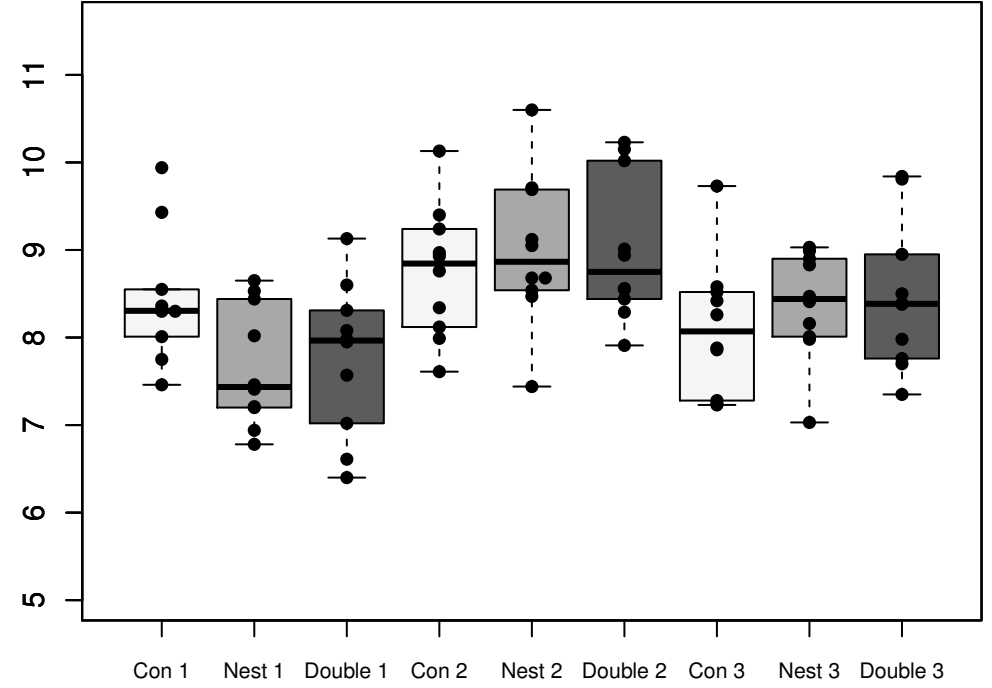**B6 male**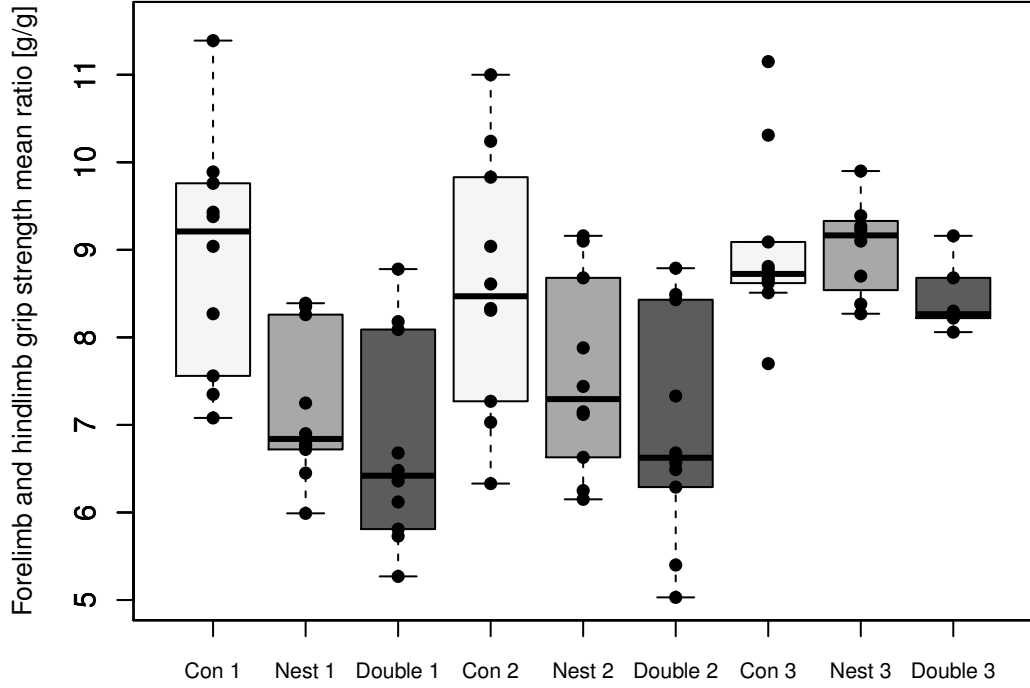**D2 male**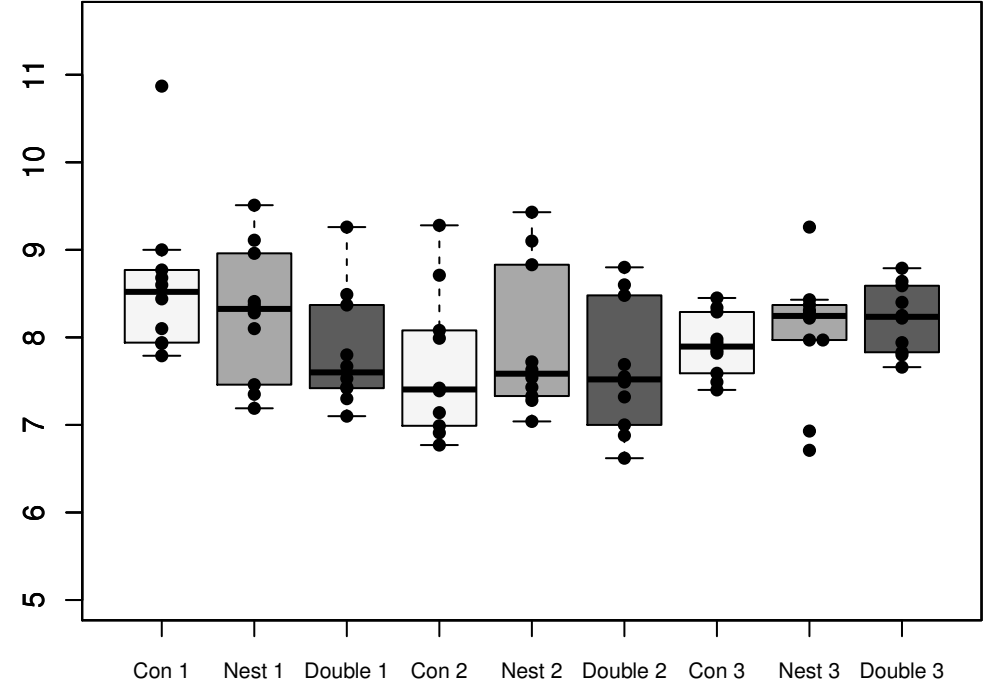



**B6 female**

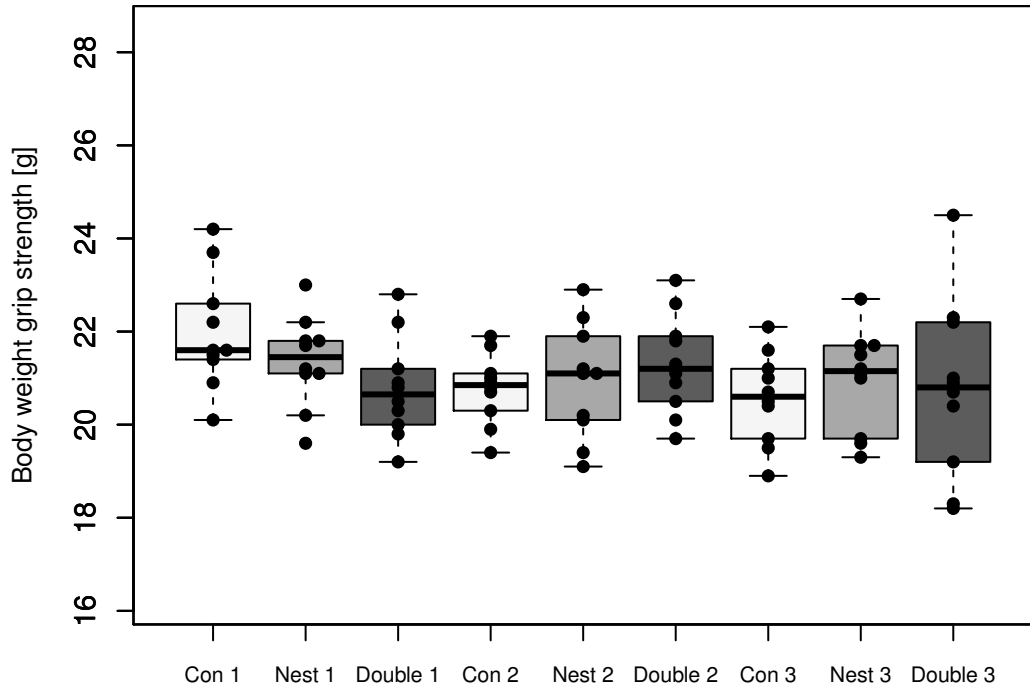

**D2 female**

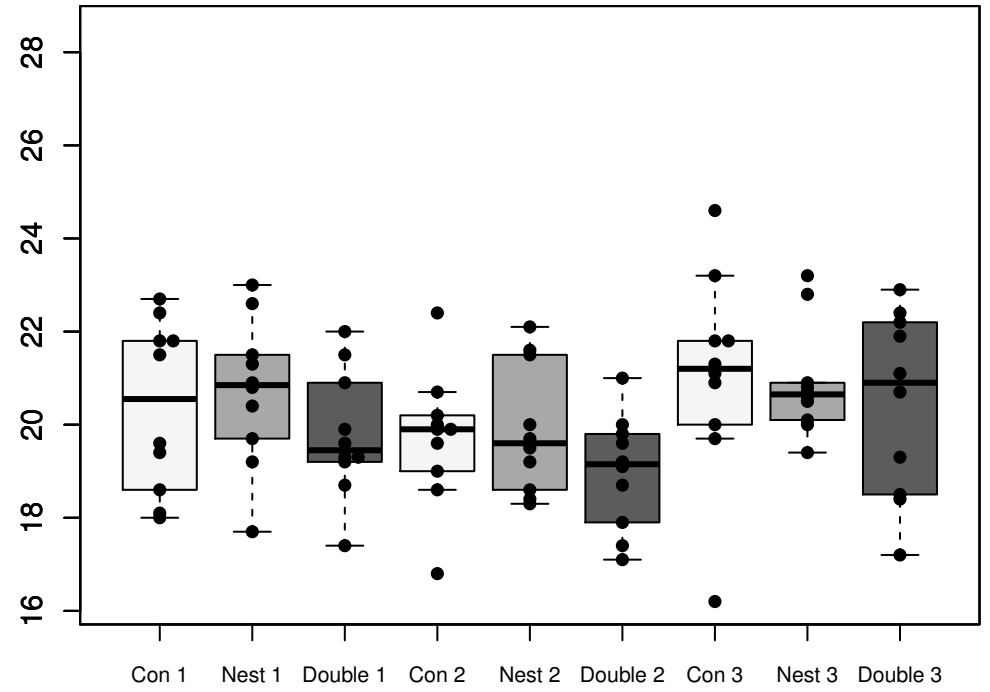

**B6 male**

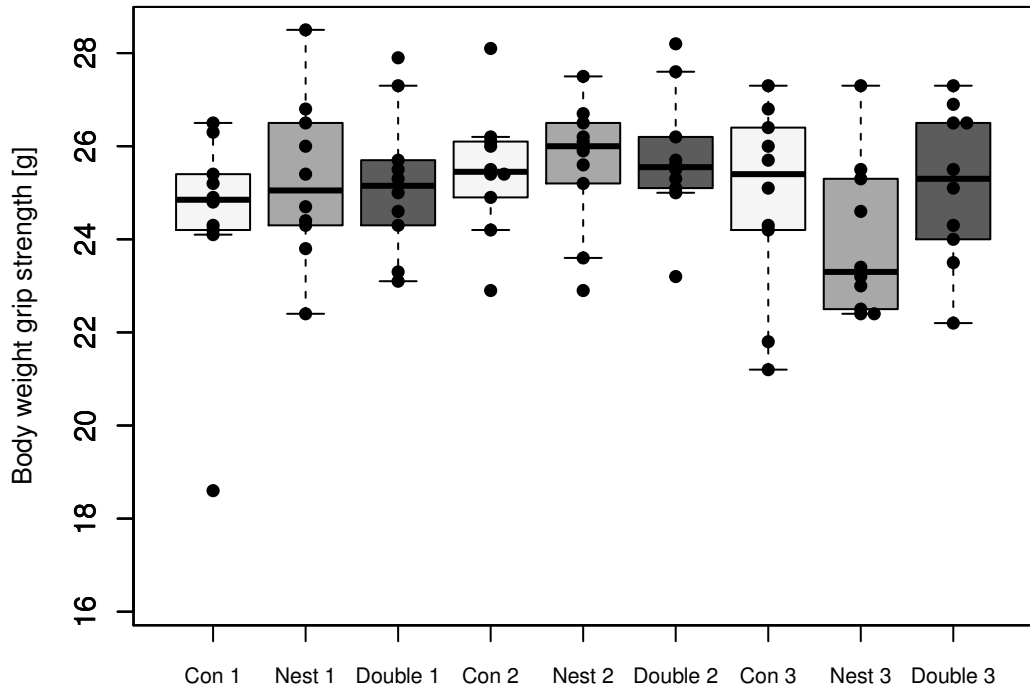

**D2 male**

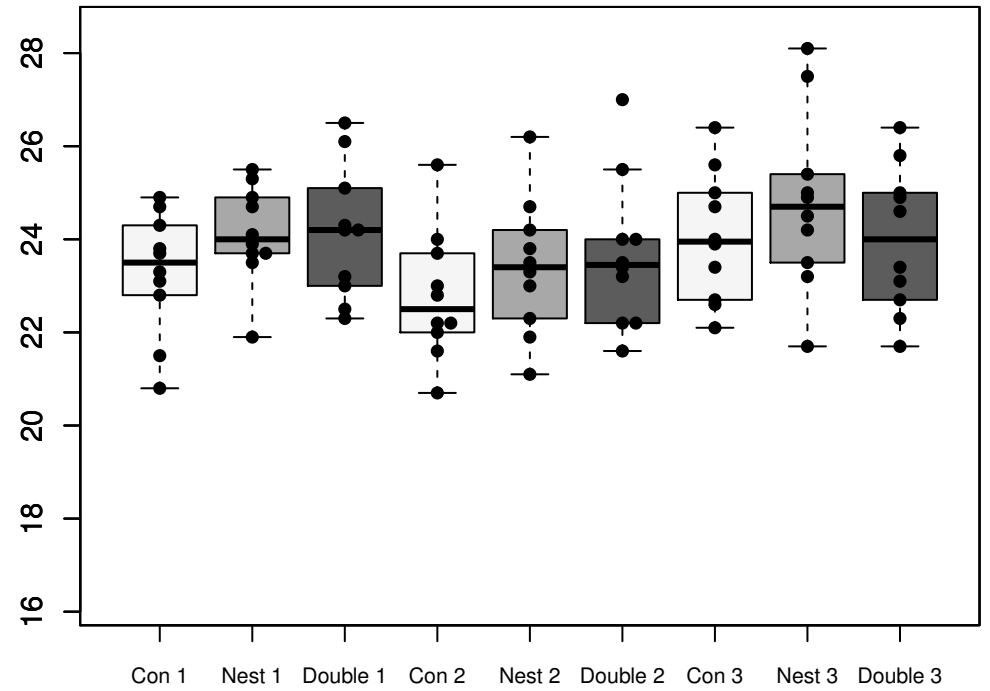

**B6 female**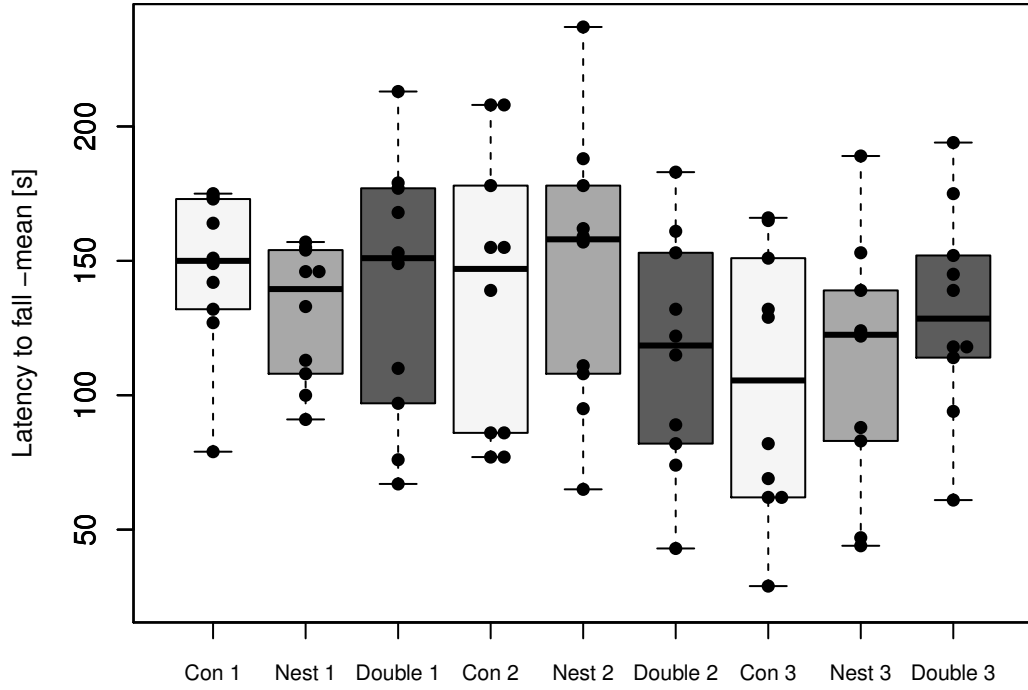**D2 female**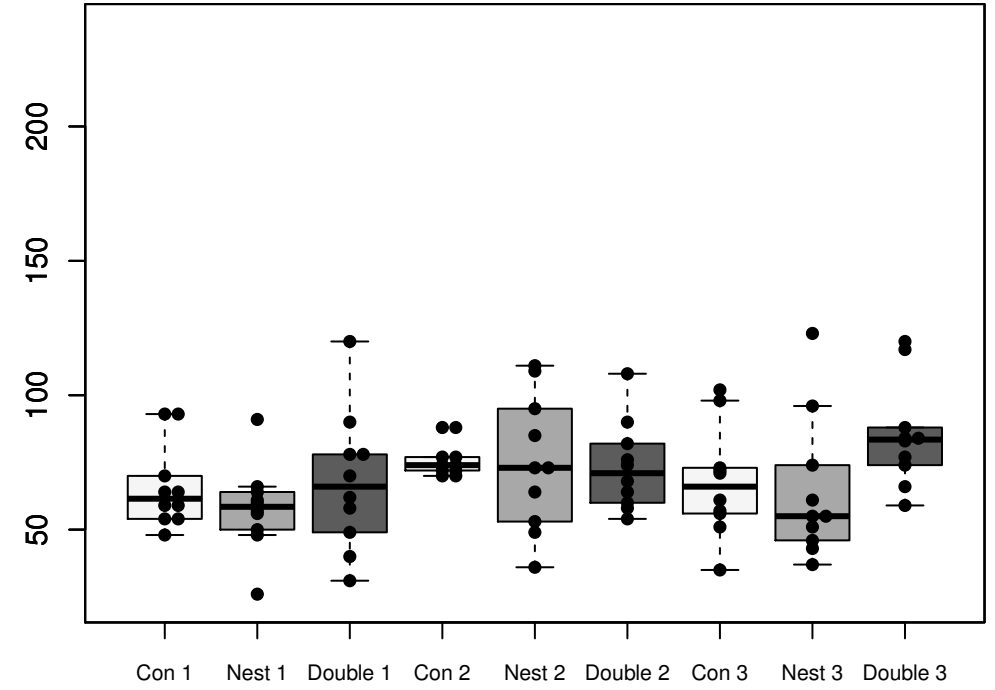**B6 male**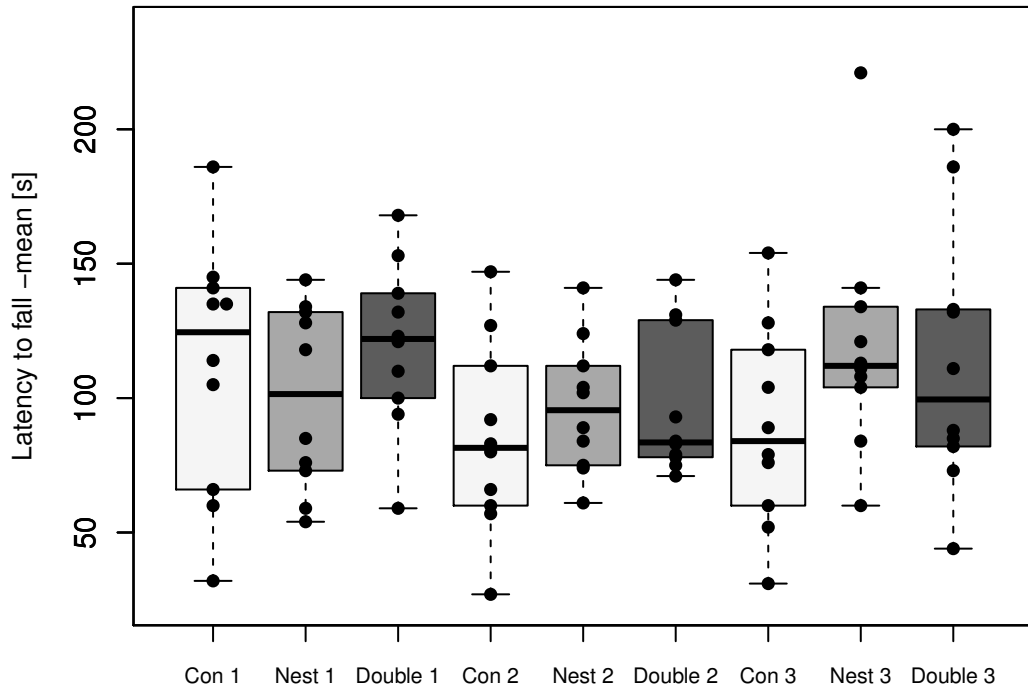**D2 male**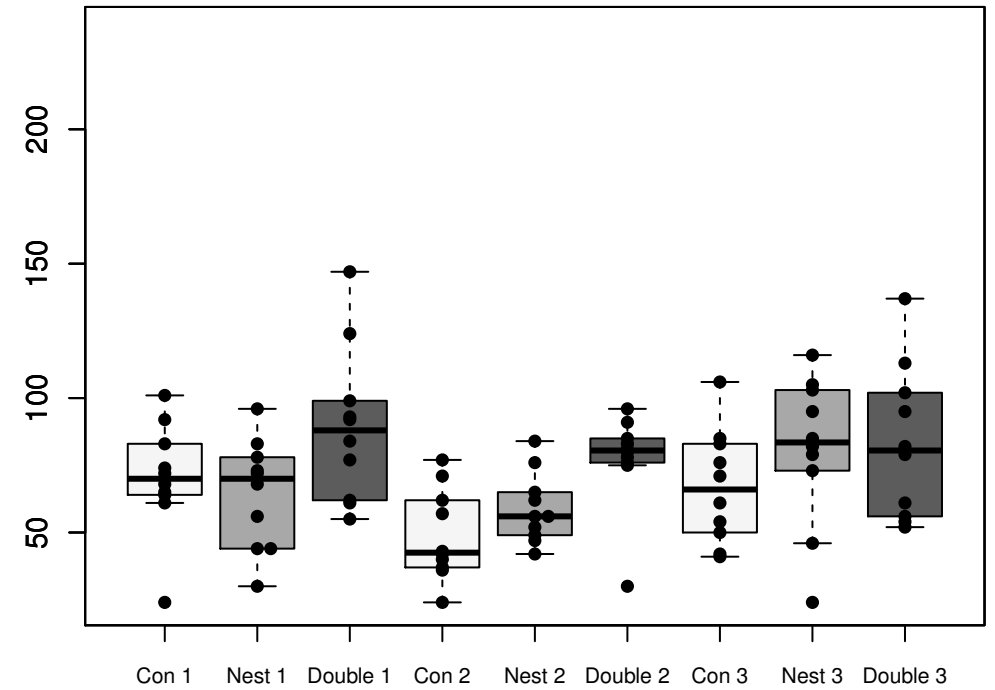

**B6 female**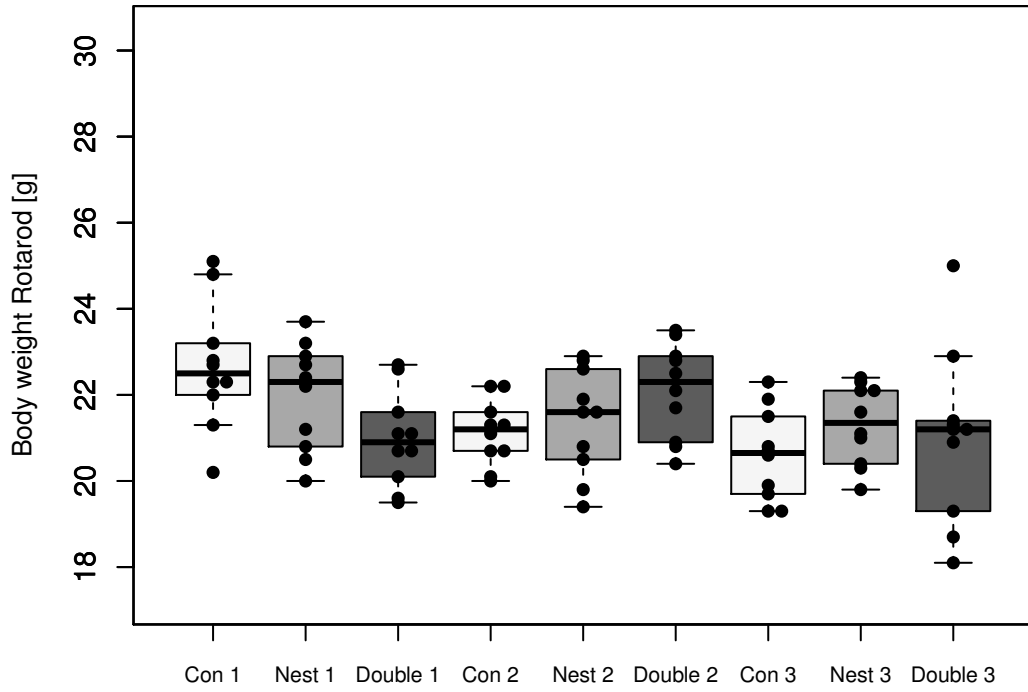**D2 female**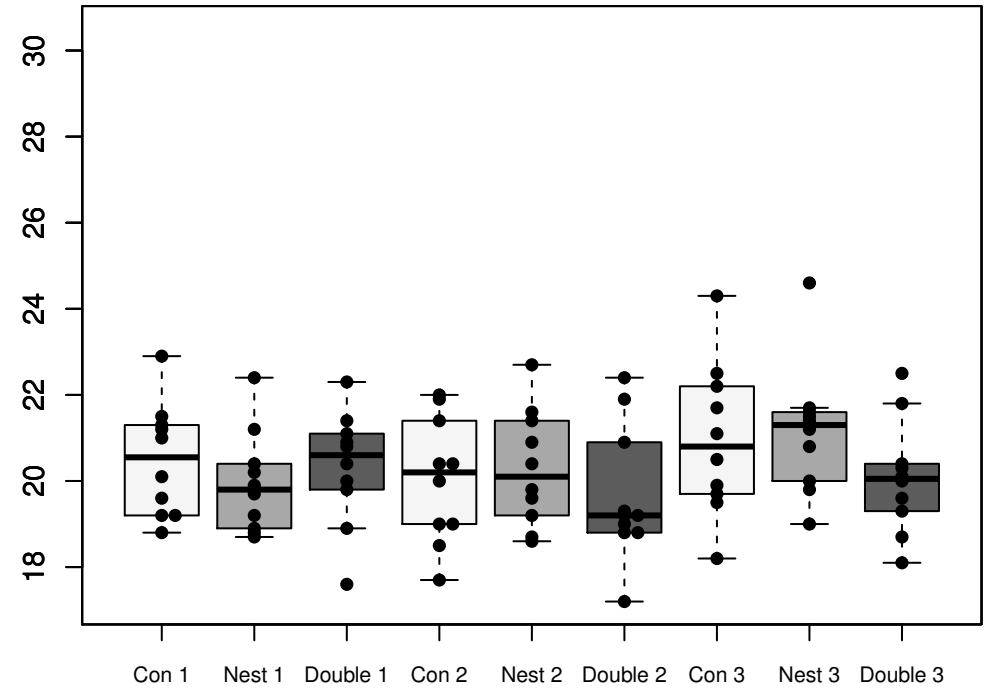**B6 male**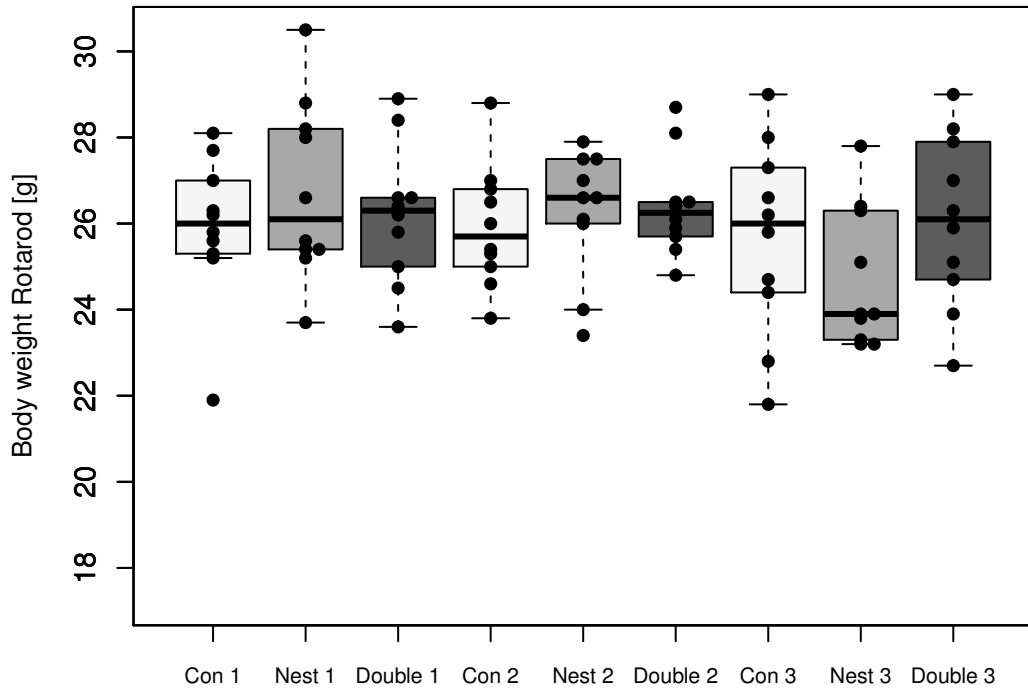**D2 male**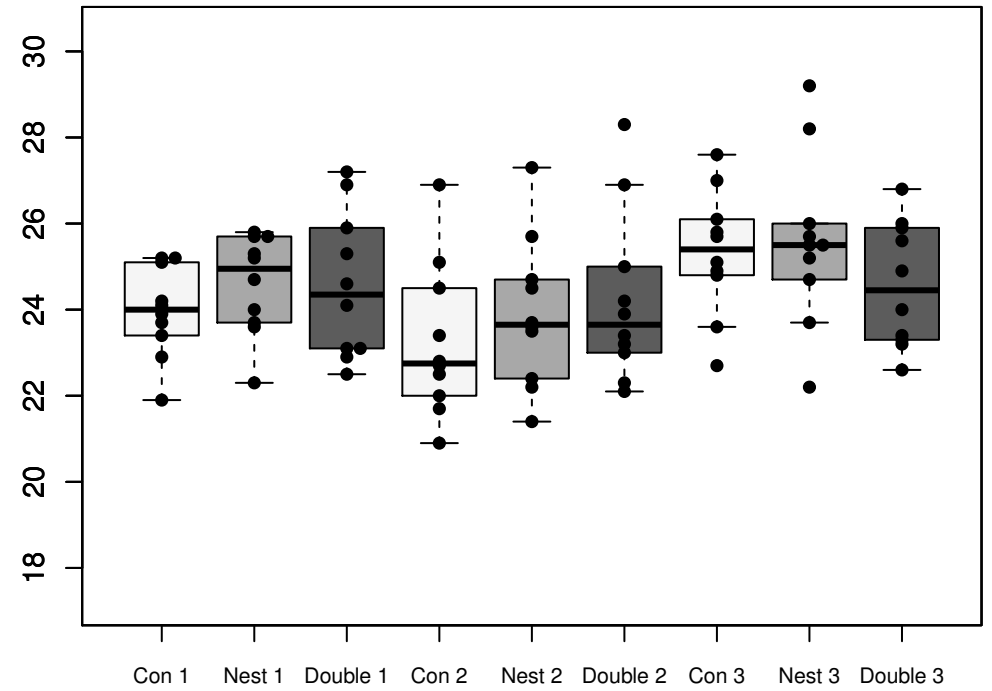

**B6 female**

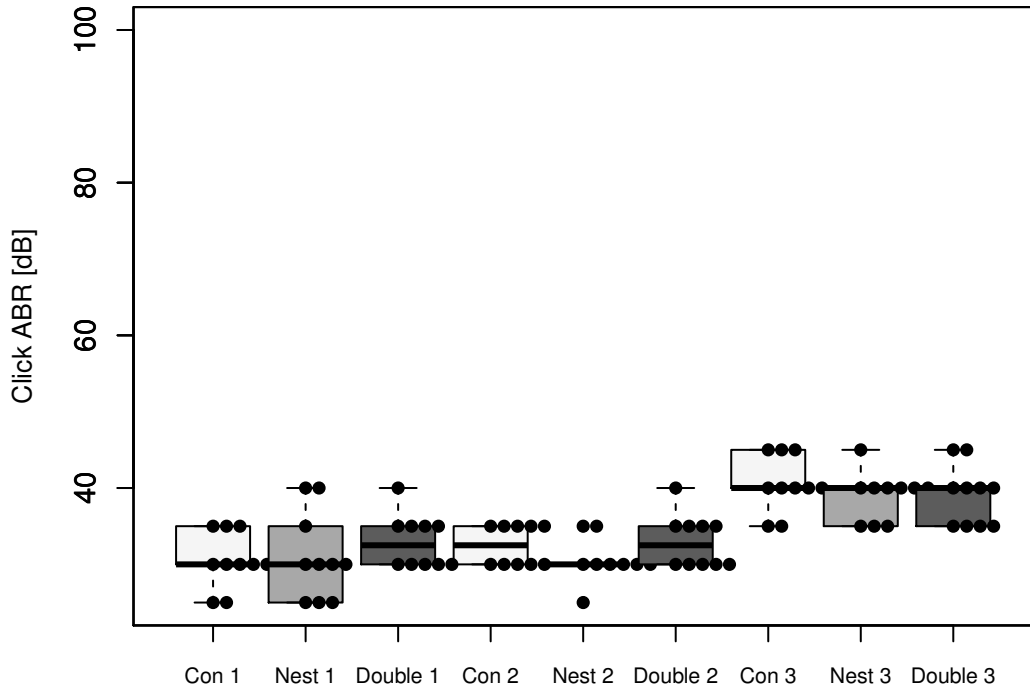

**D2 female**

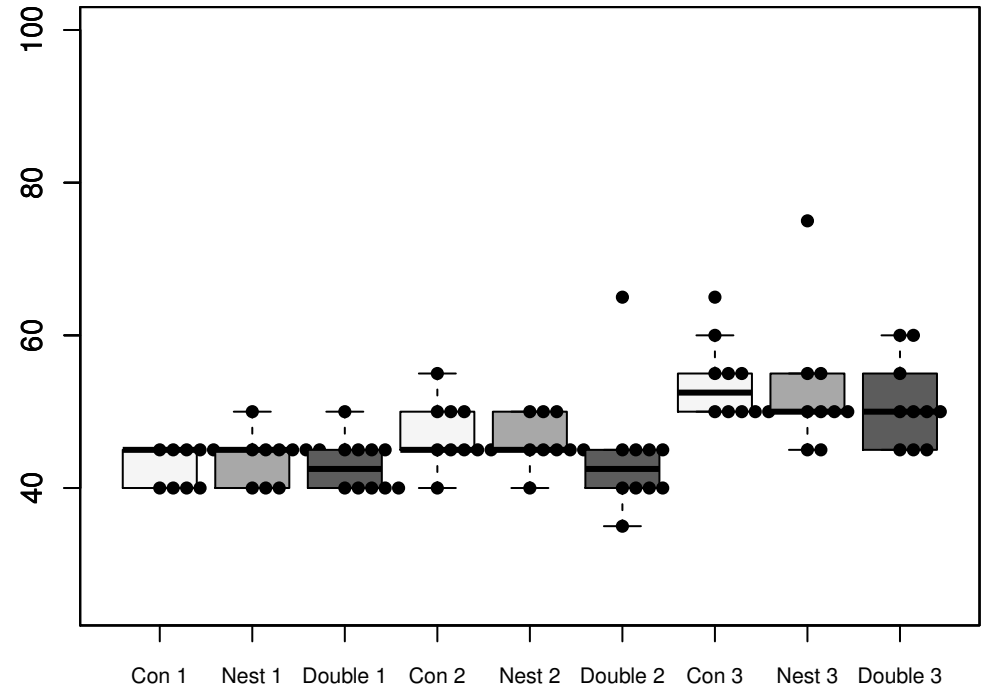

**B6 male**

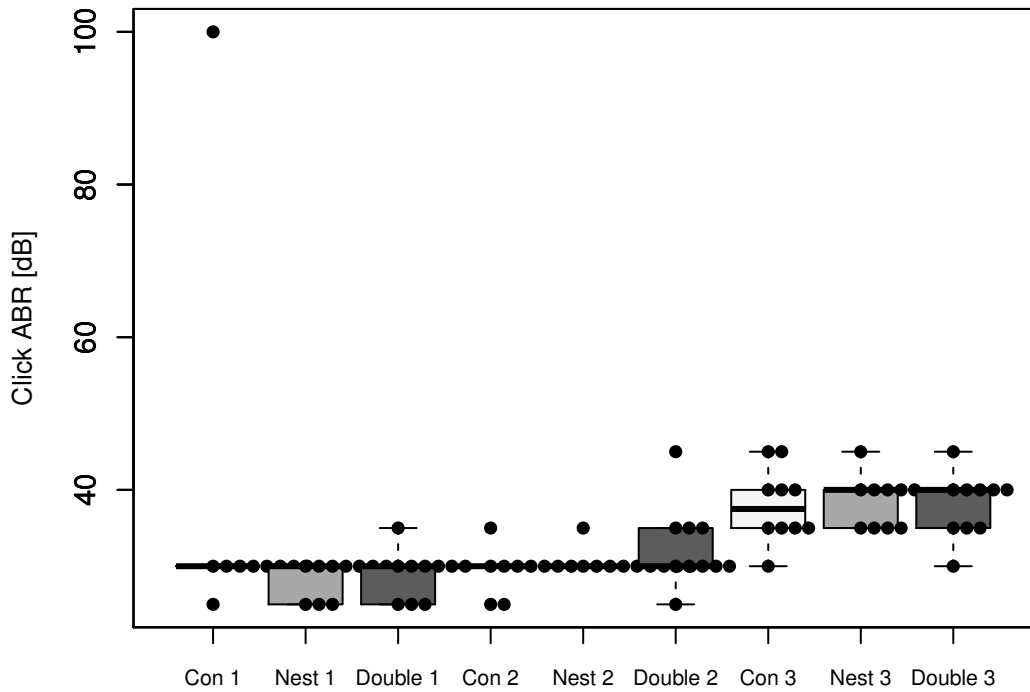

**D2 male**

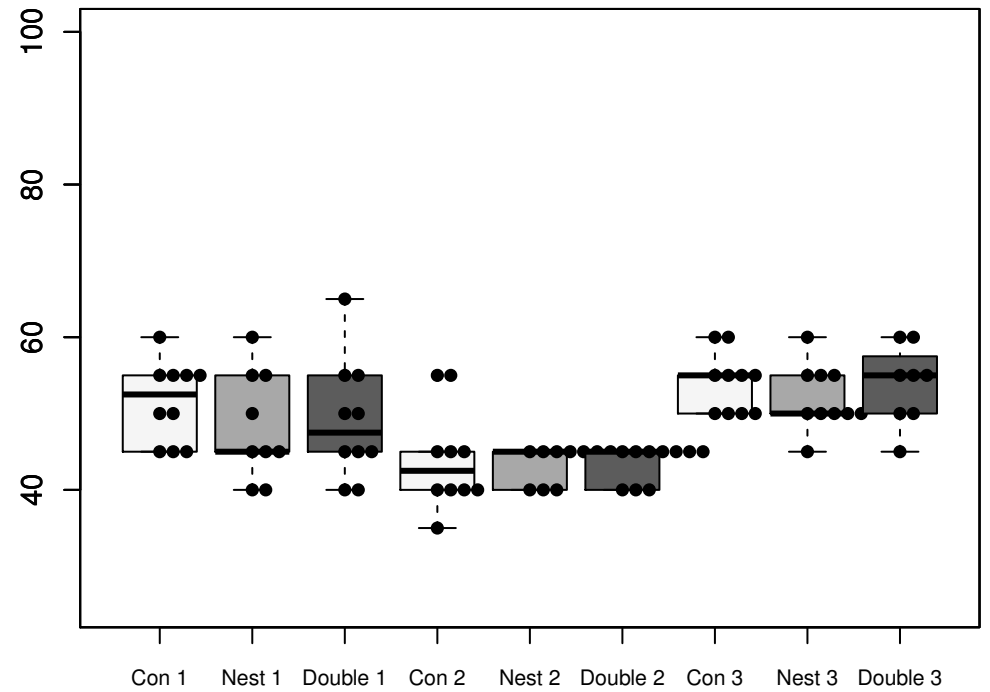

**B6 female**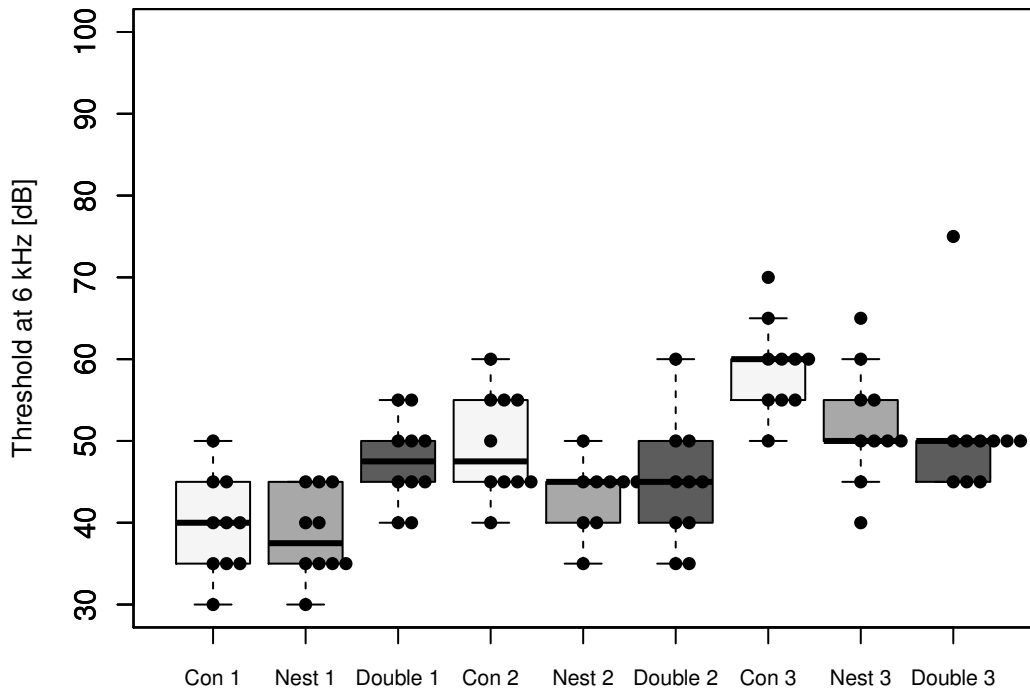**D2 female**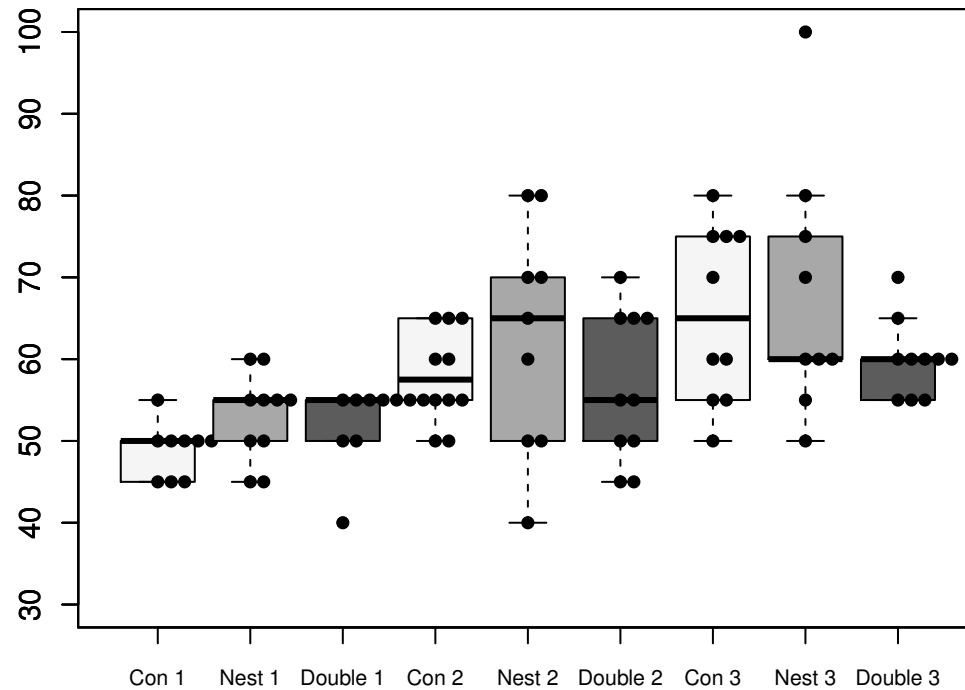**B6 male**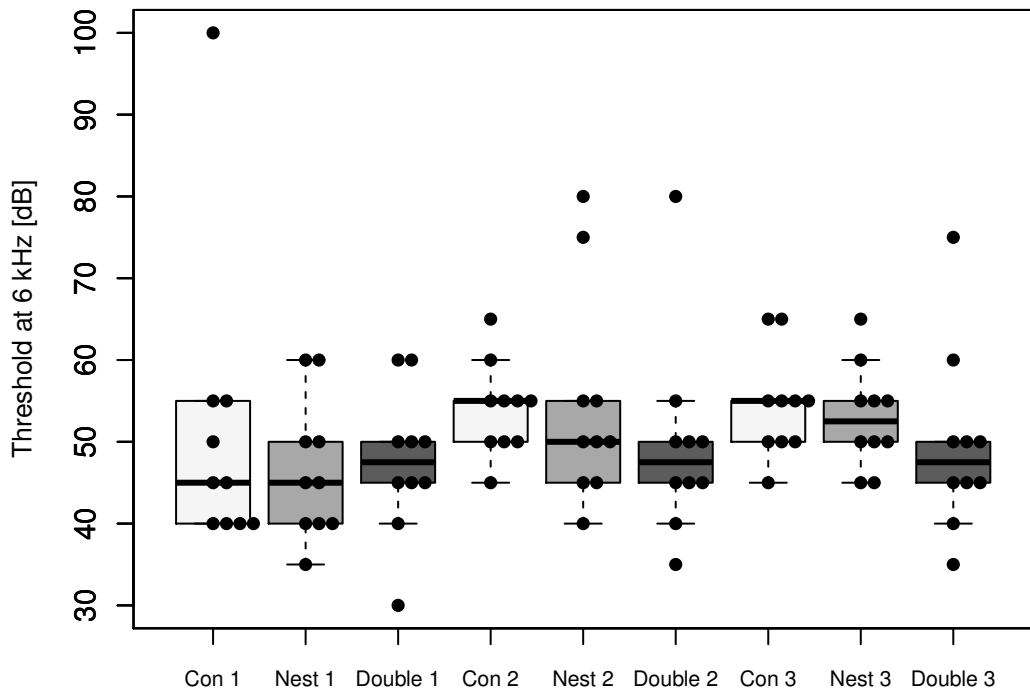**D2 male**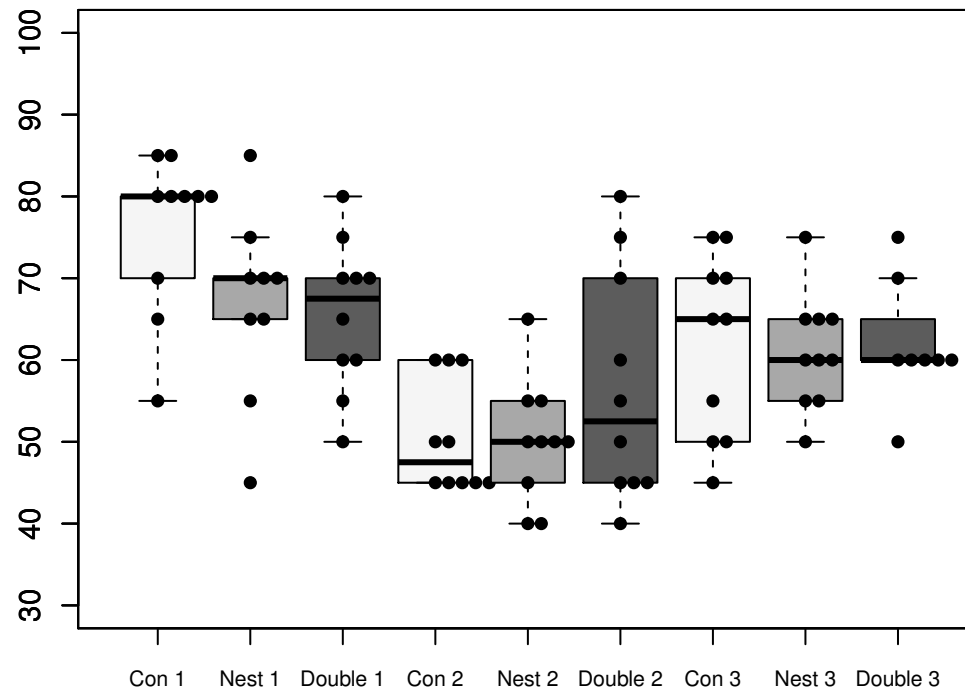

**B6 female**

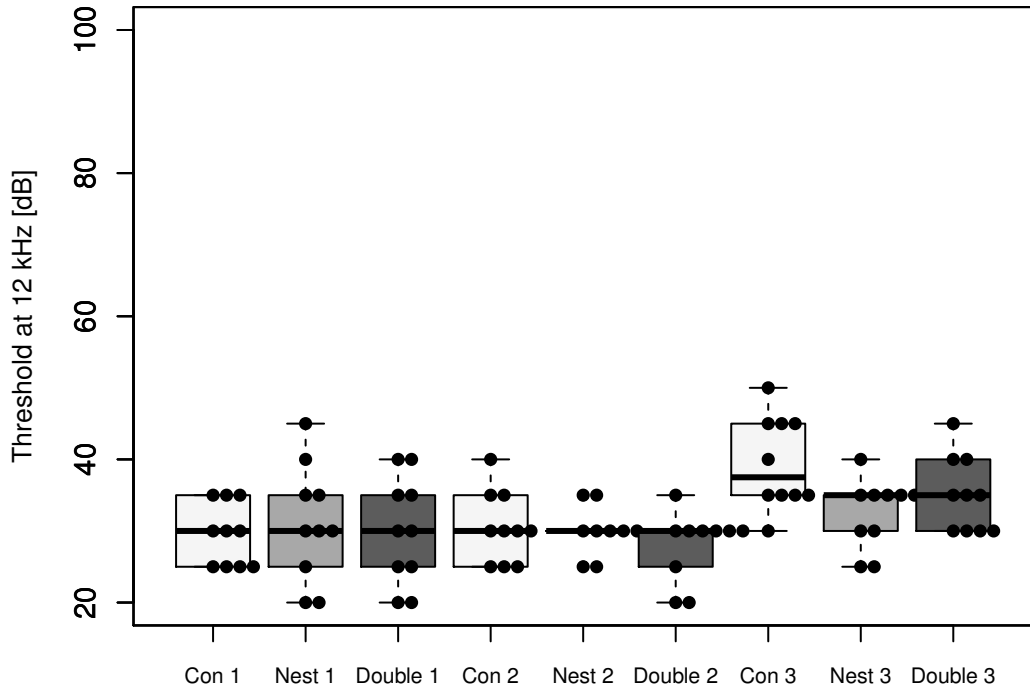

**D2 female**

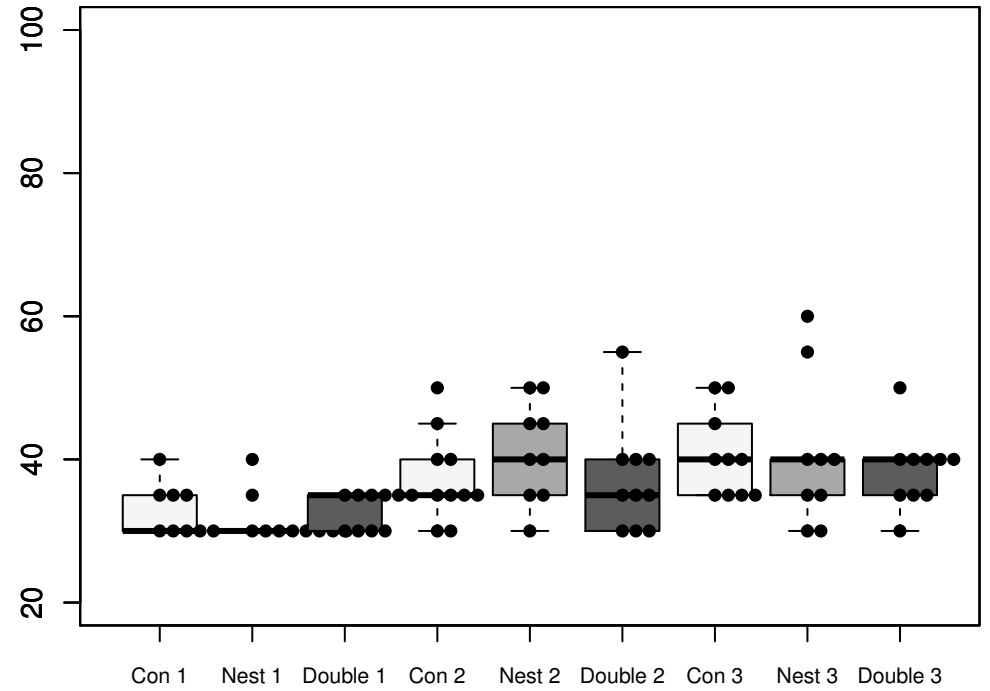

**B6 male**

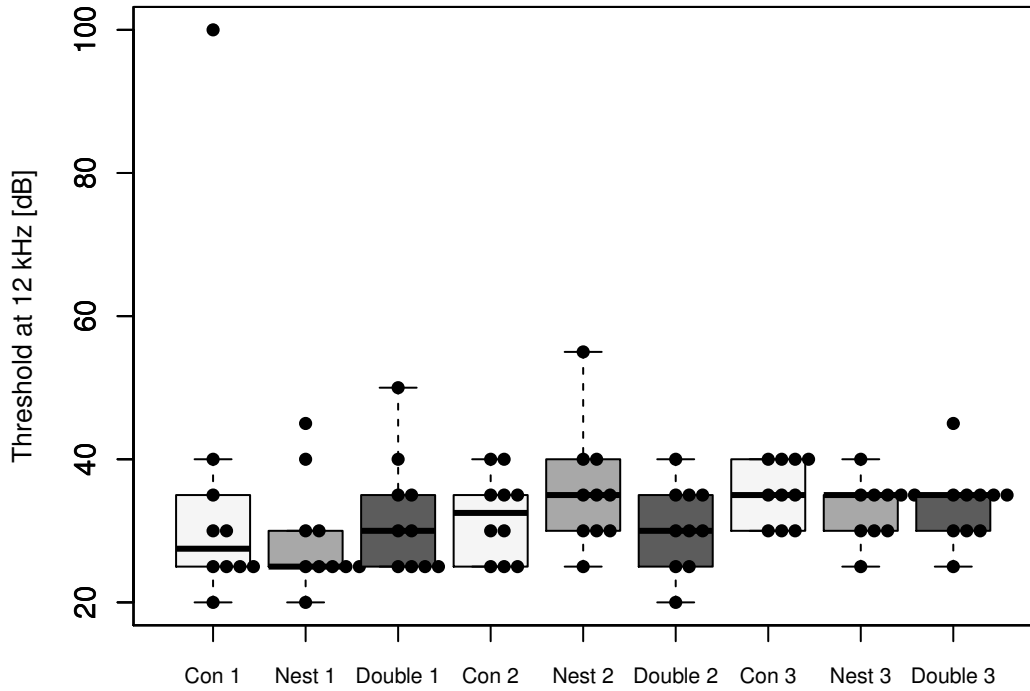

**D2 male**

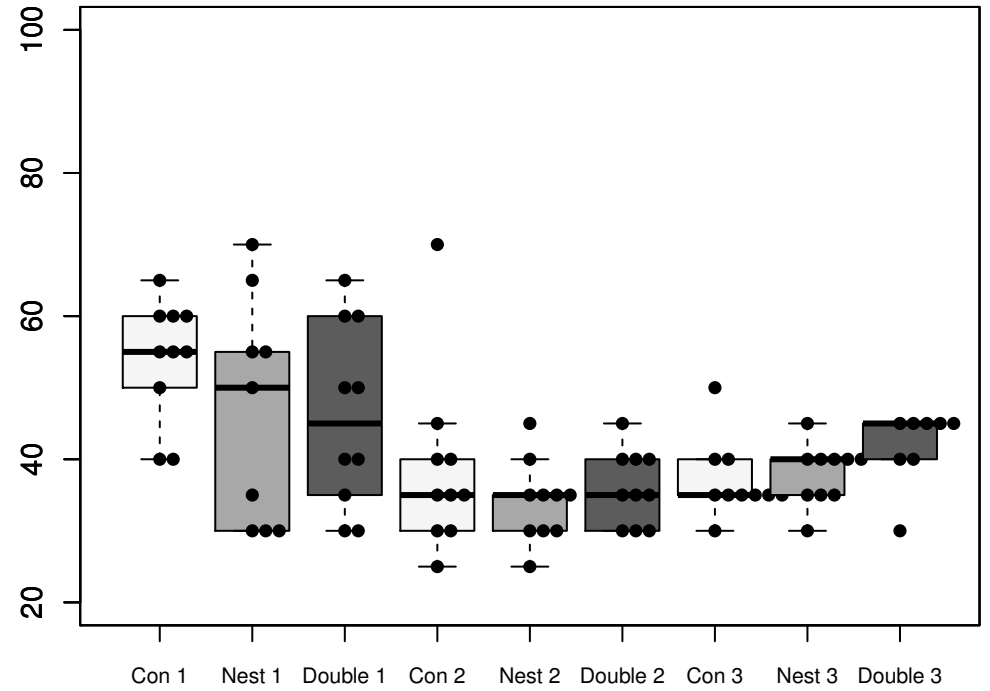

**B6 female**

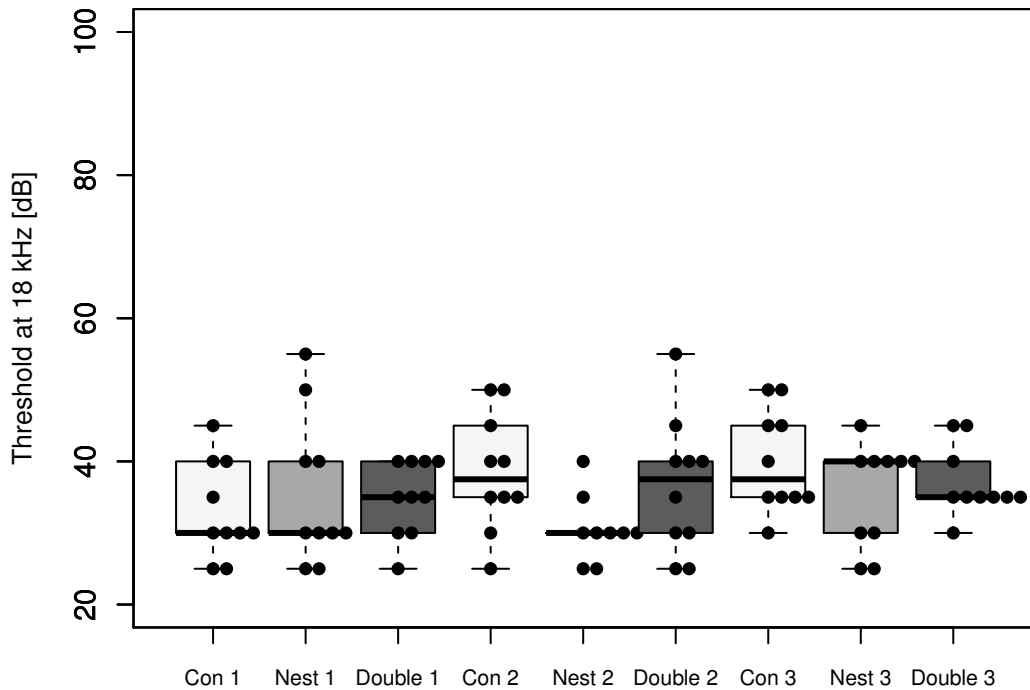

**D2 female**

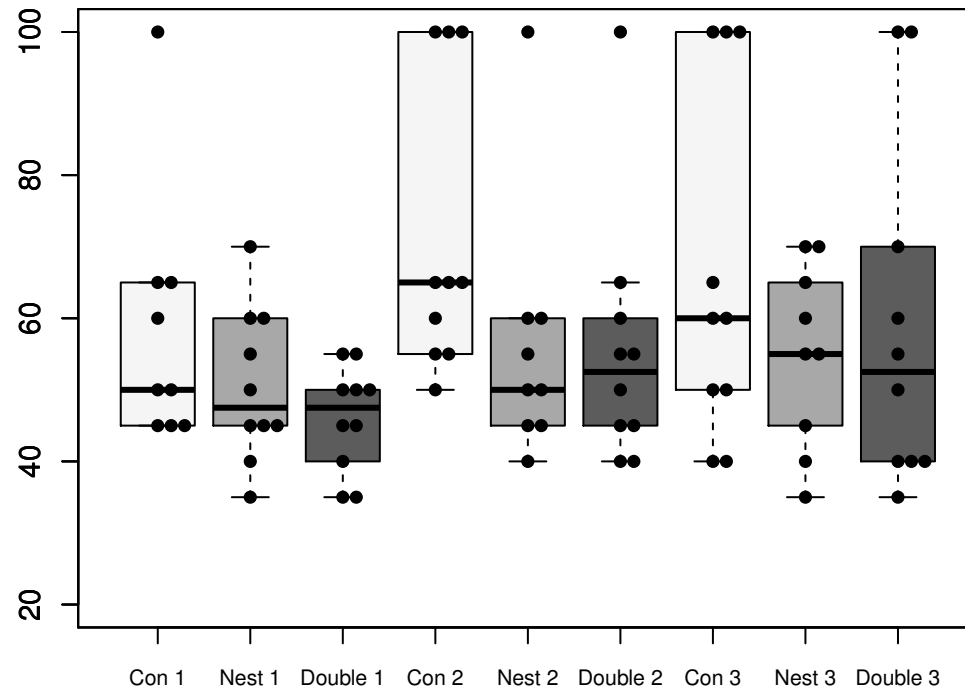

**B6 male**

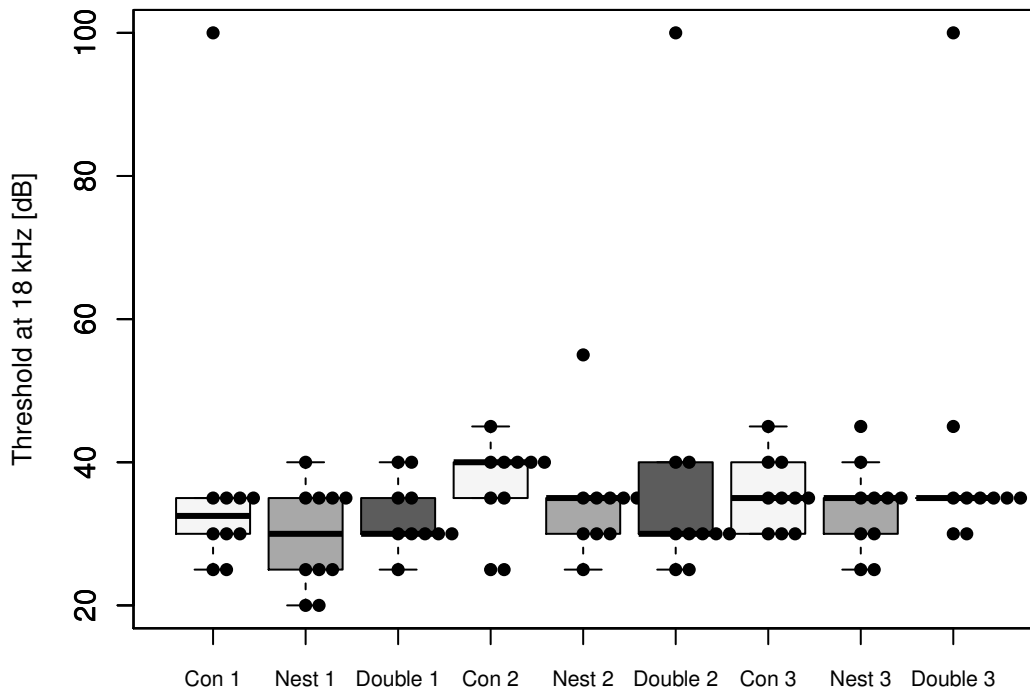

**D2 male**

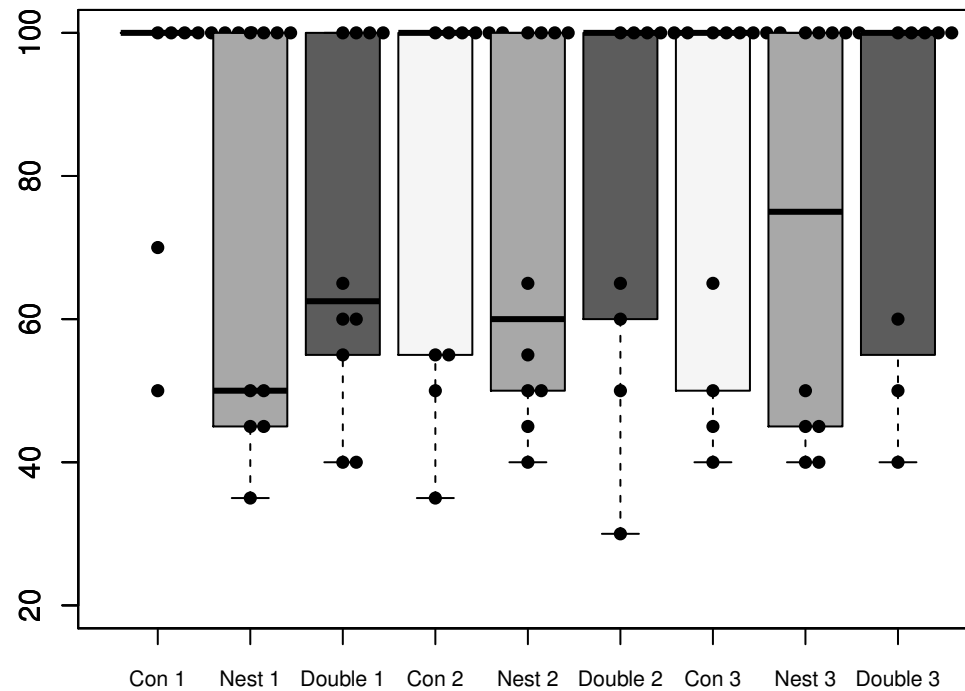

**B6 female**

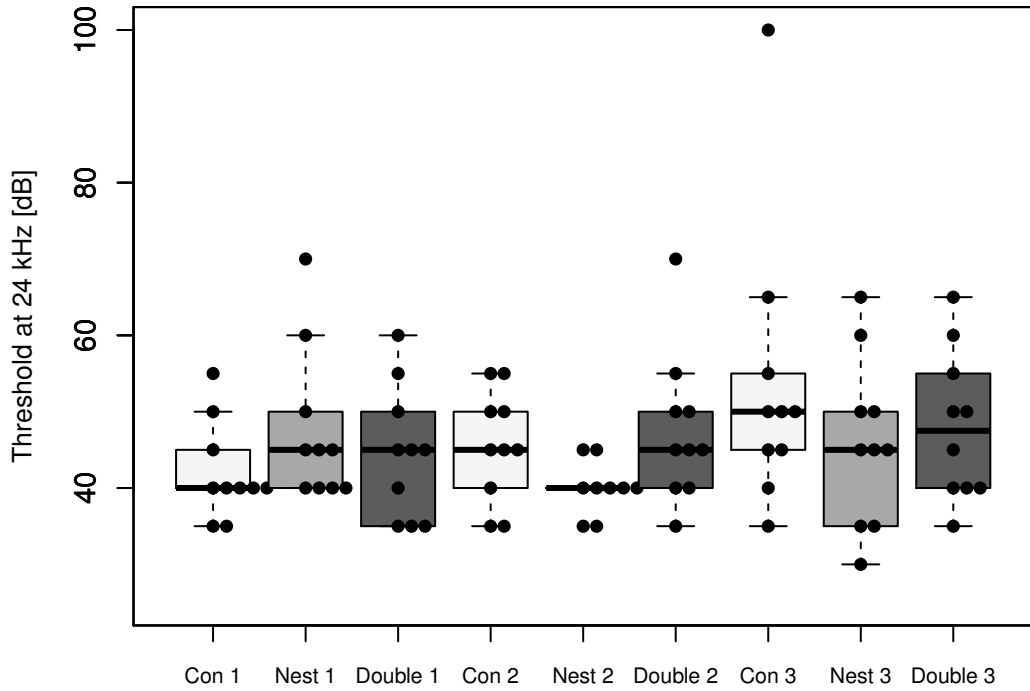

**D2 female**

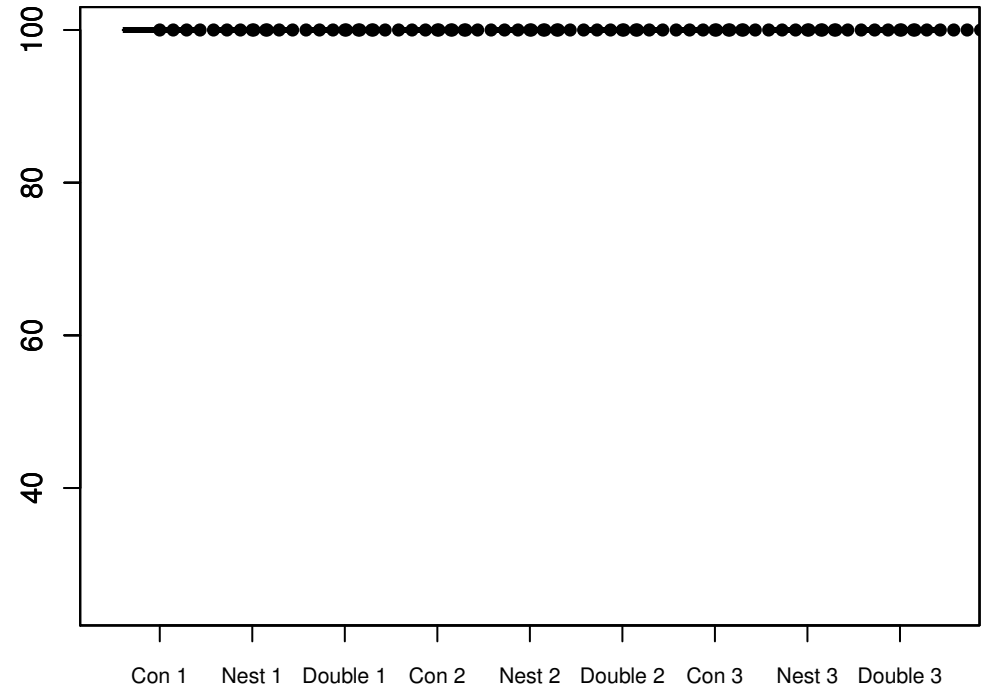

**B6 male**

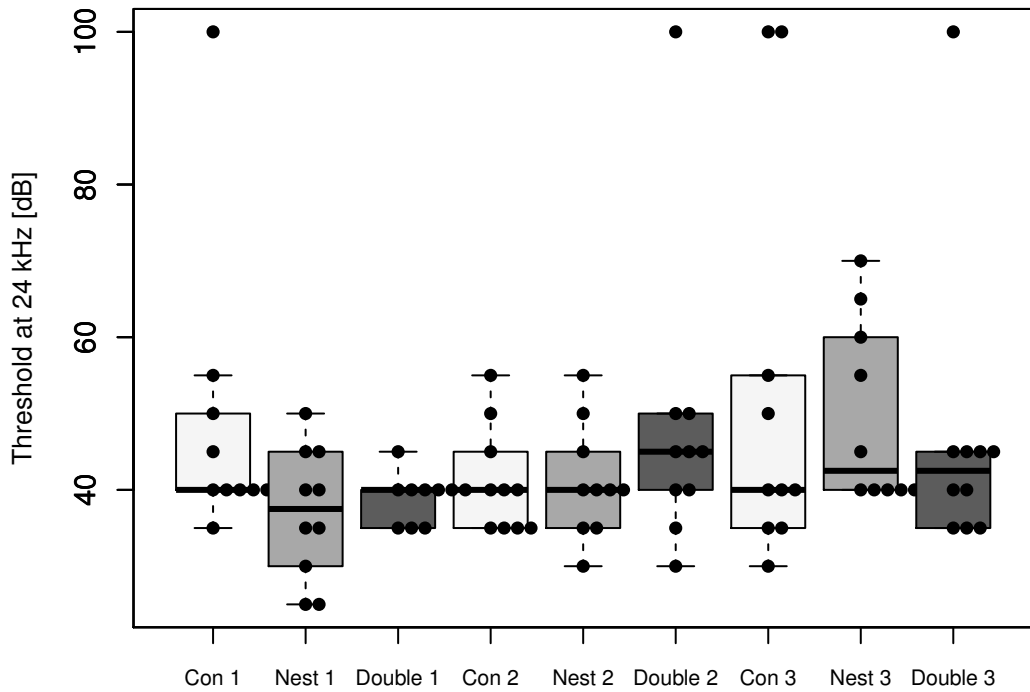

**D2 male**

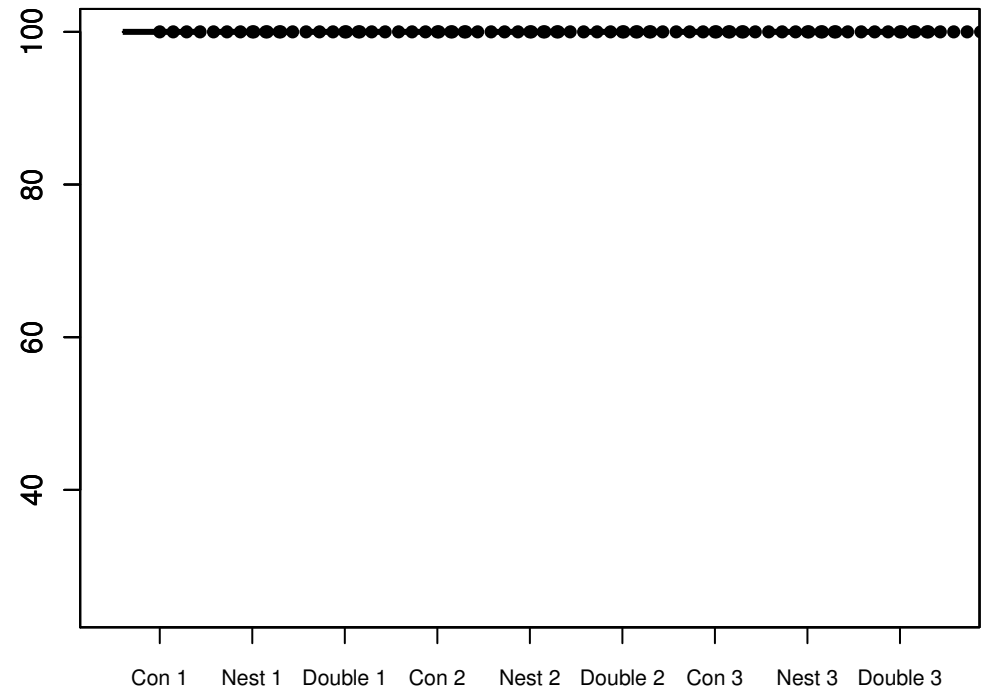



**B6 female**

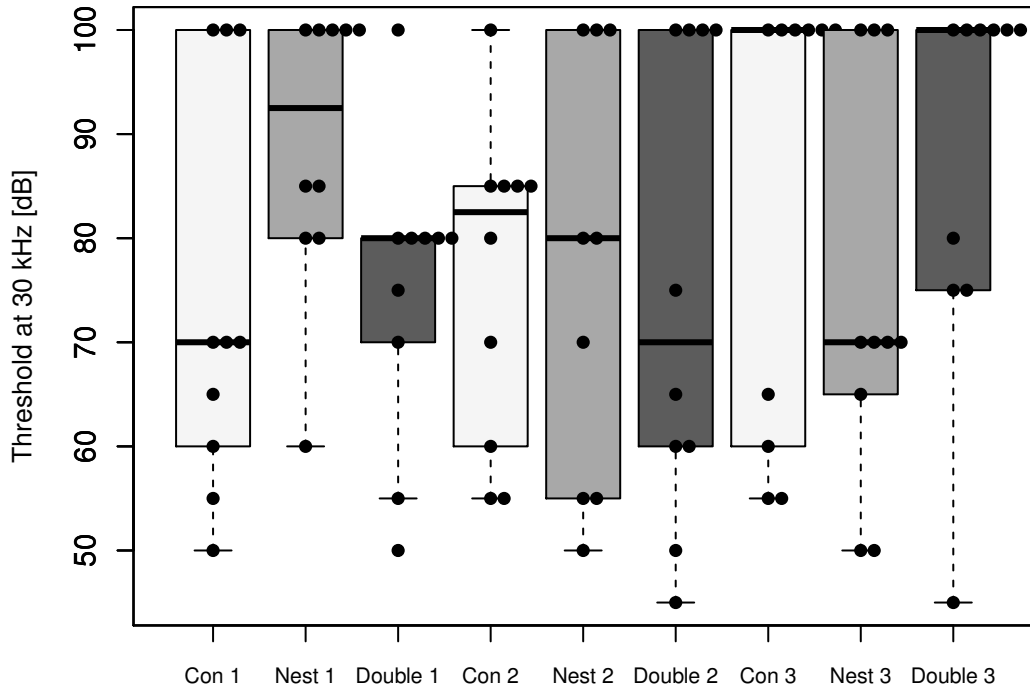

**D2 female**

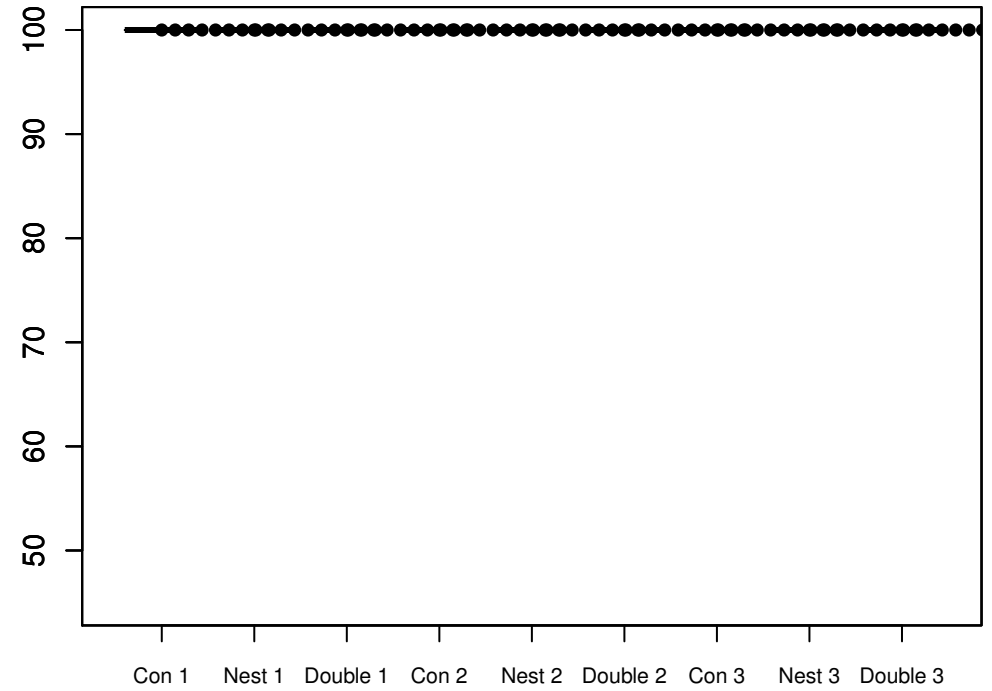

**B6 male**

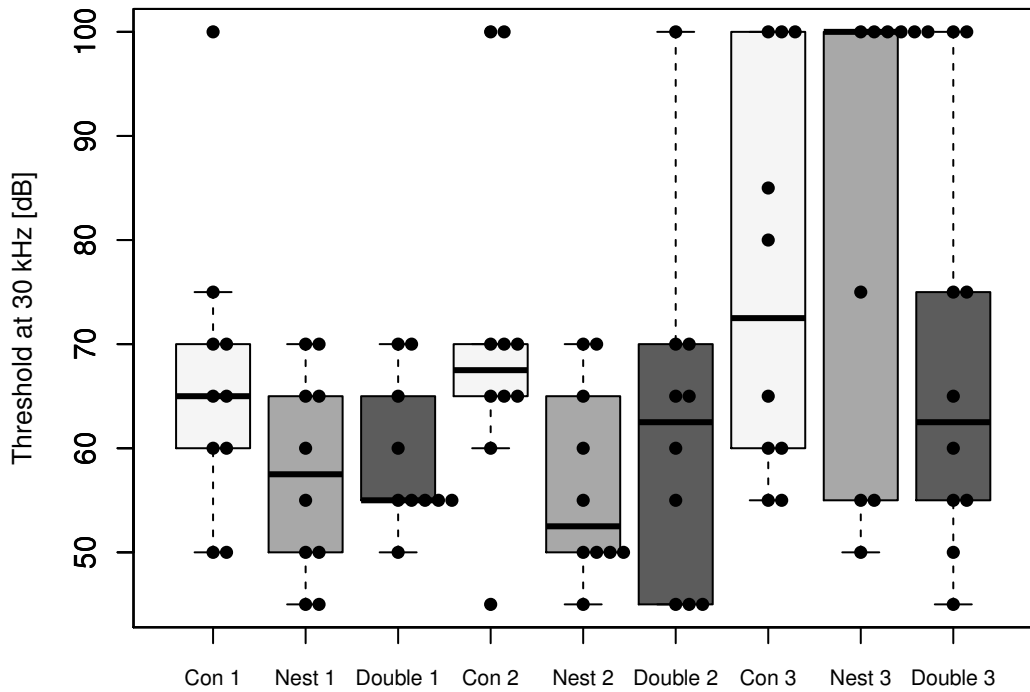

**D2 male**

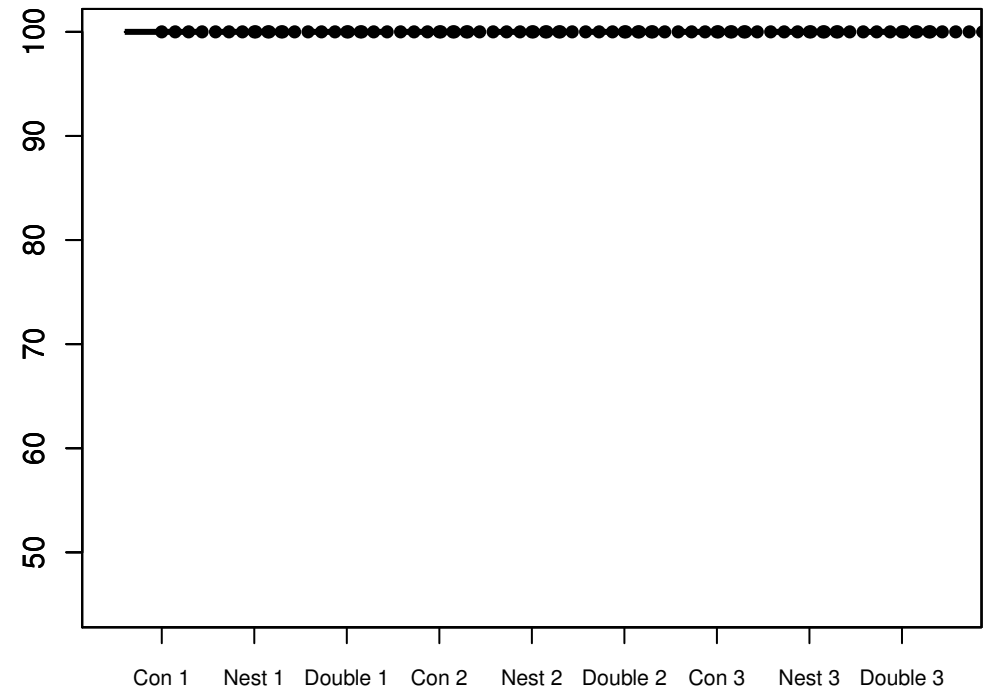

**B6 female**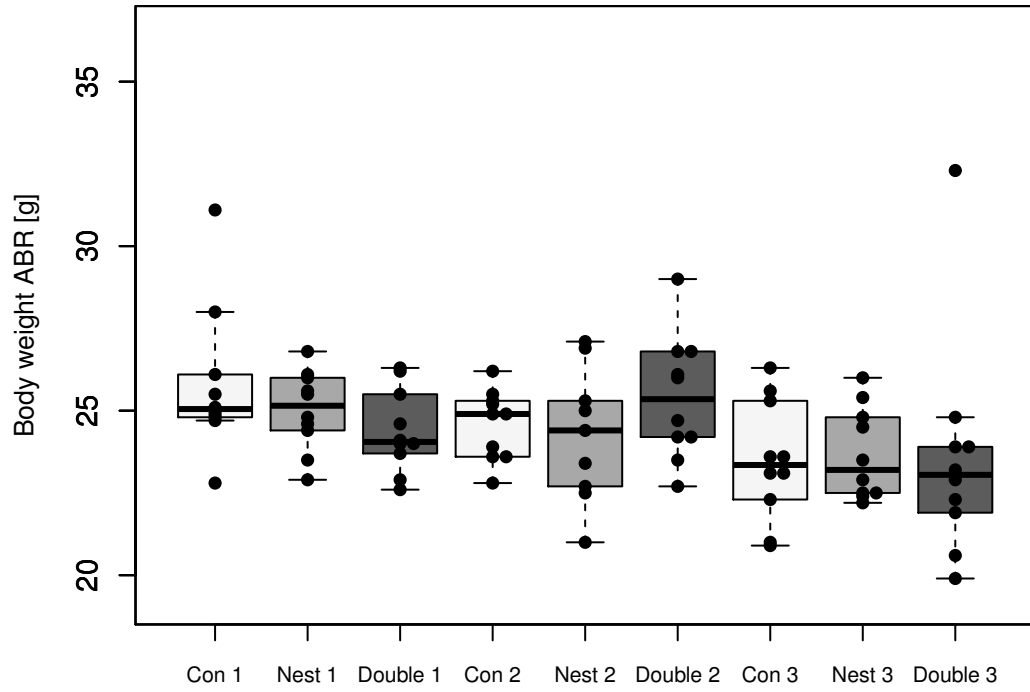**D2 female**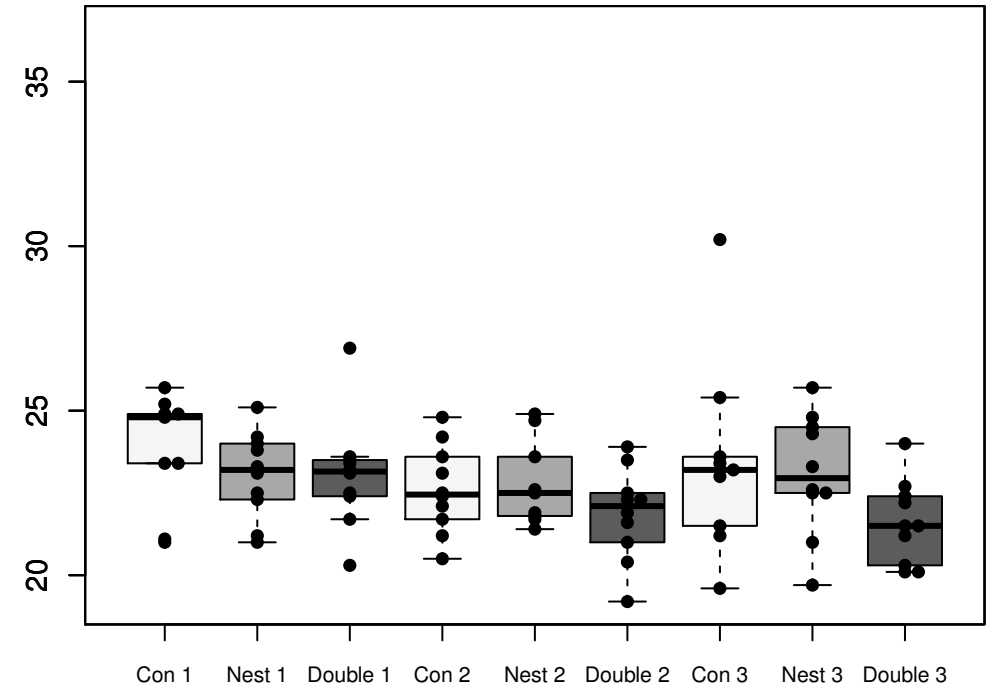**B6 male**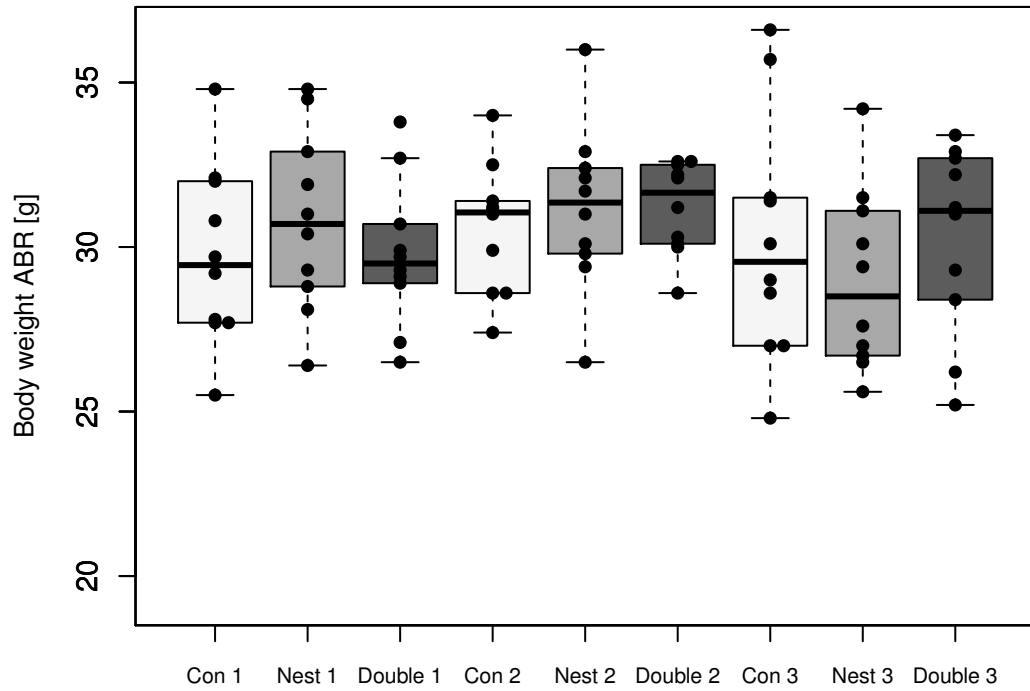**D2 male**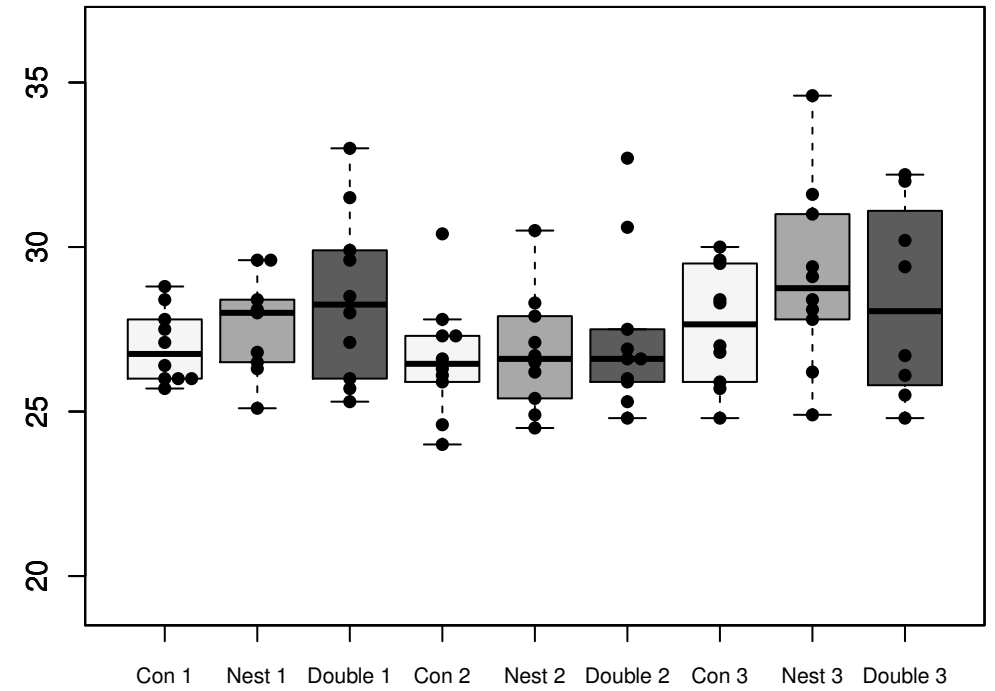

**B6 female**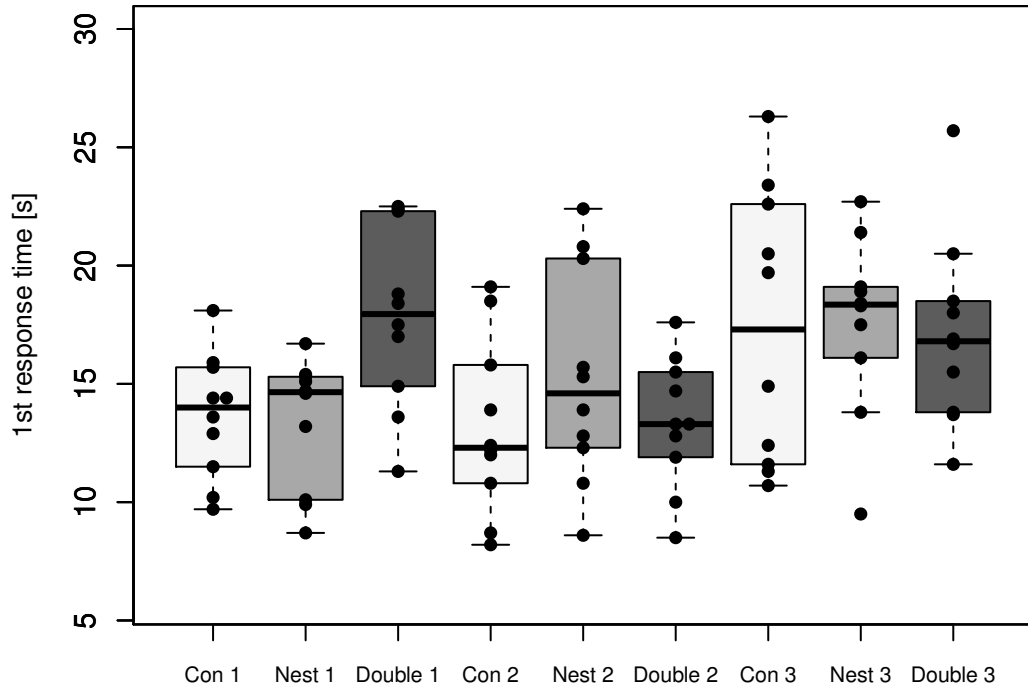**D2 female**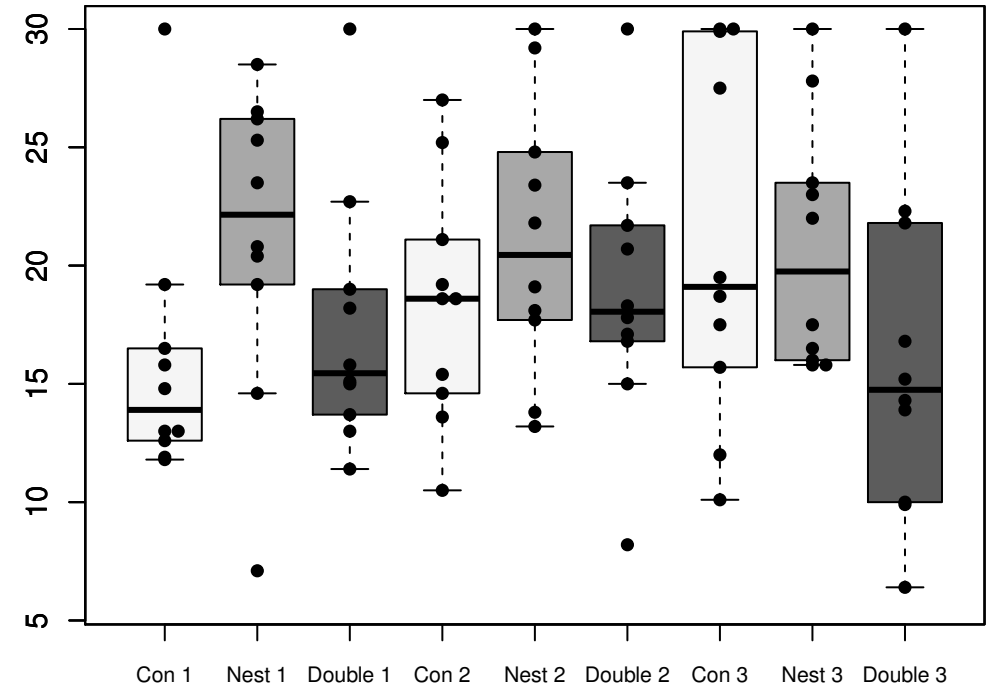**B6 male**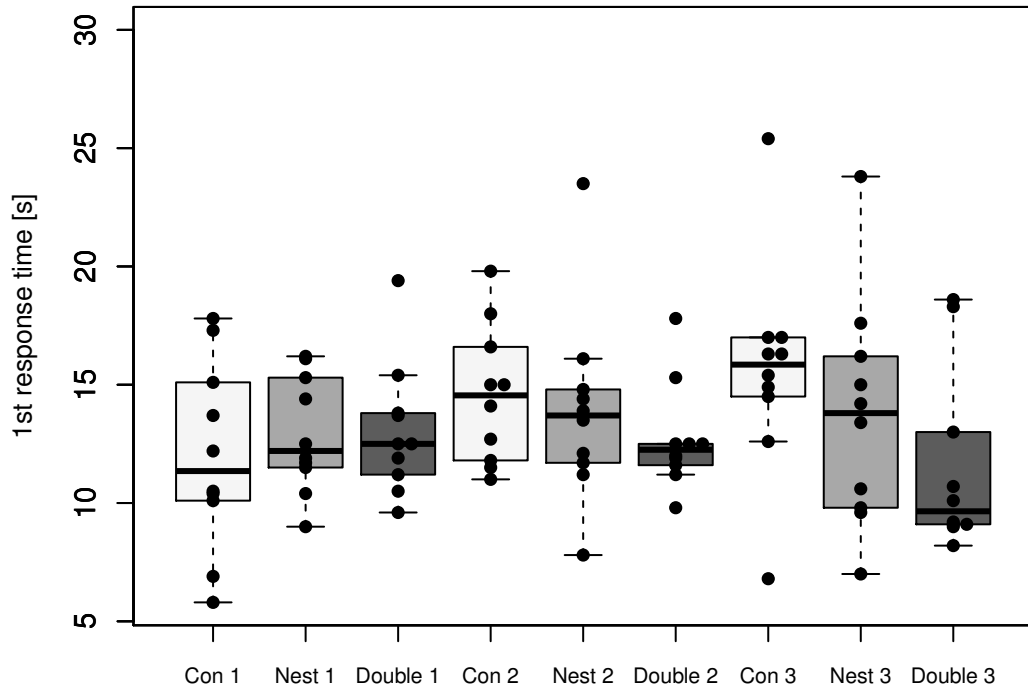**D2 male**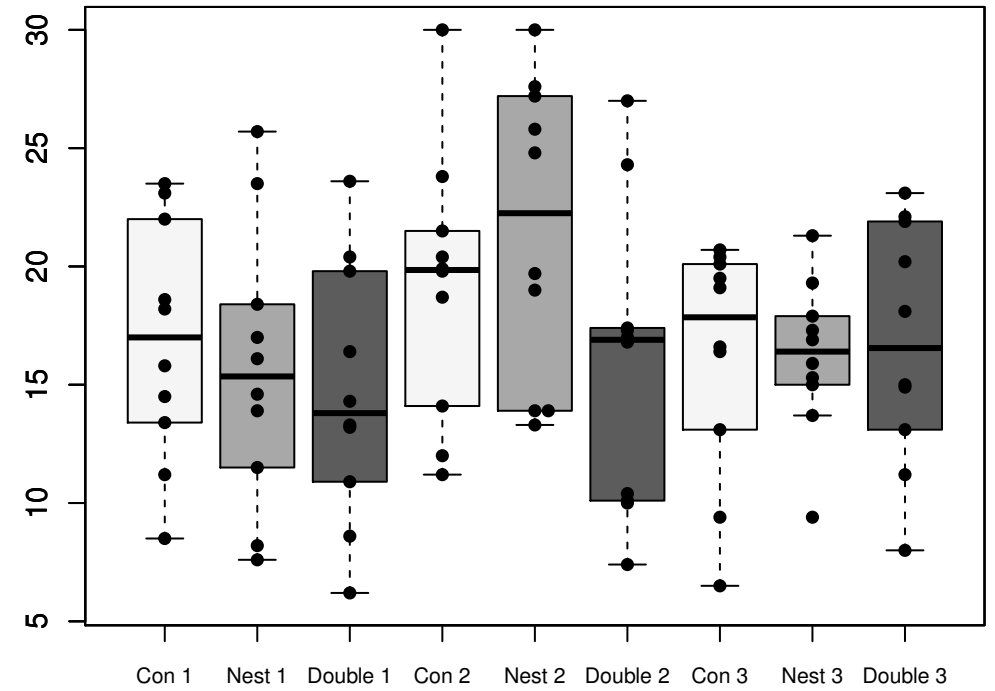

**B6 female**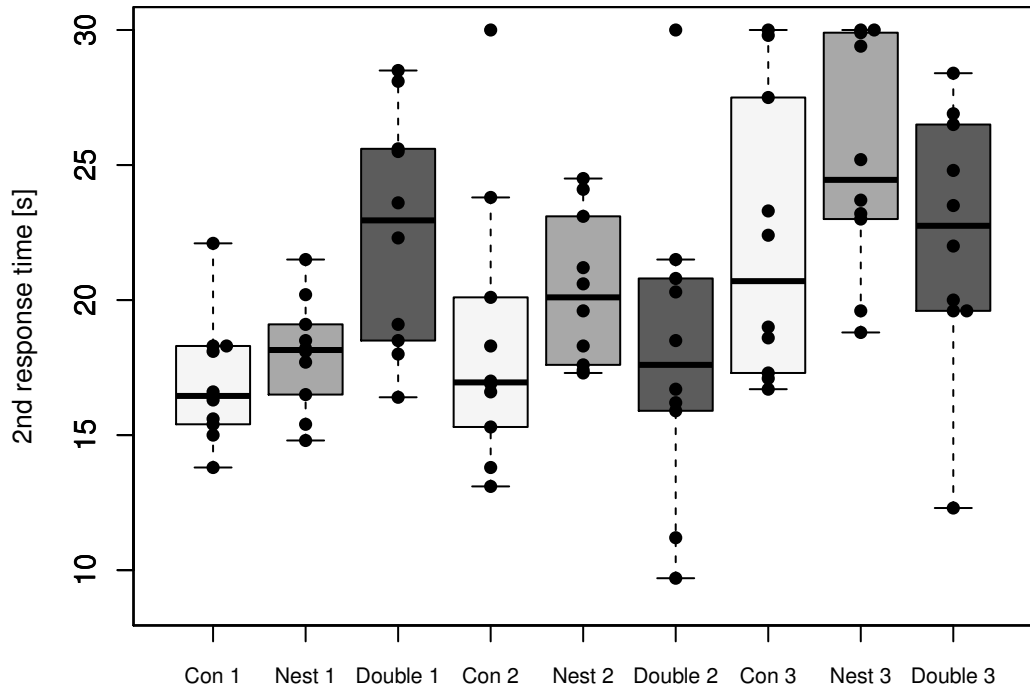**D2 female**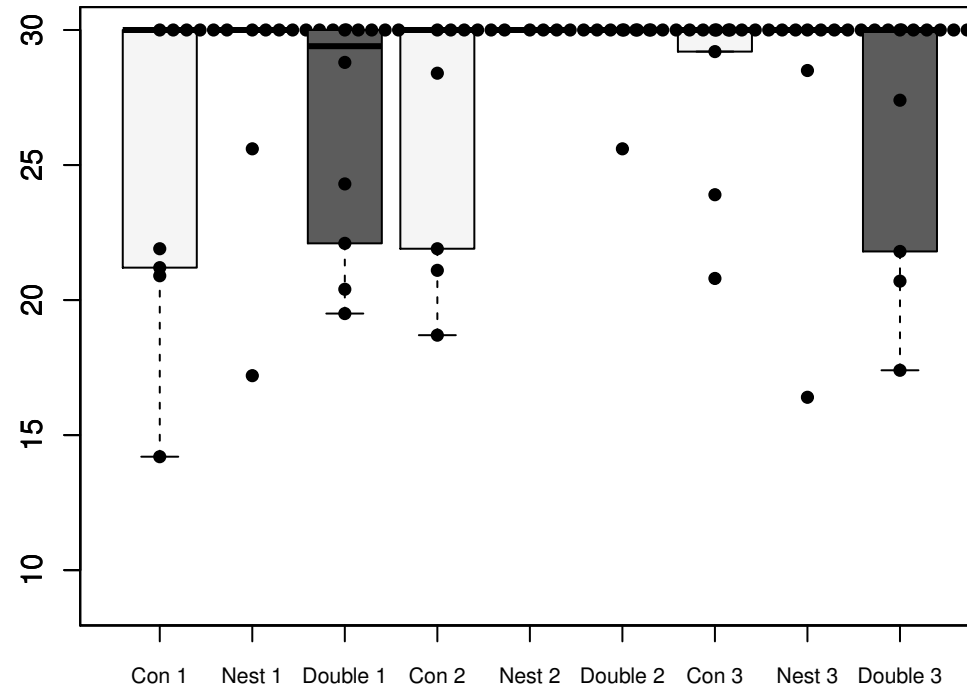**B6 male**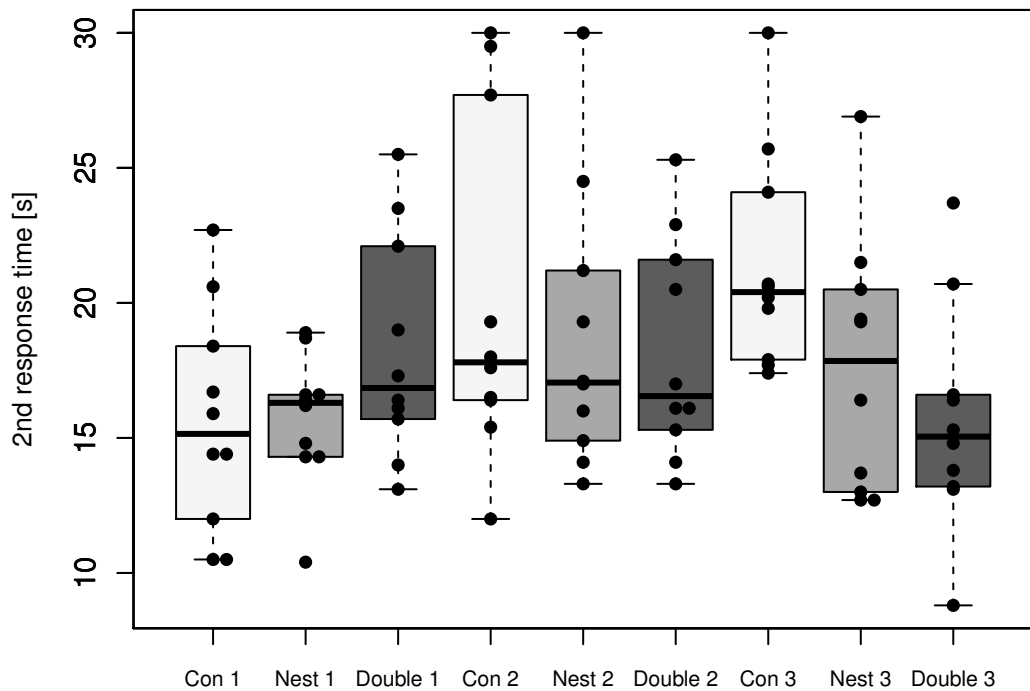**D2 male**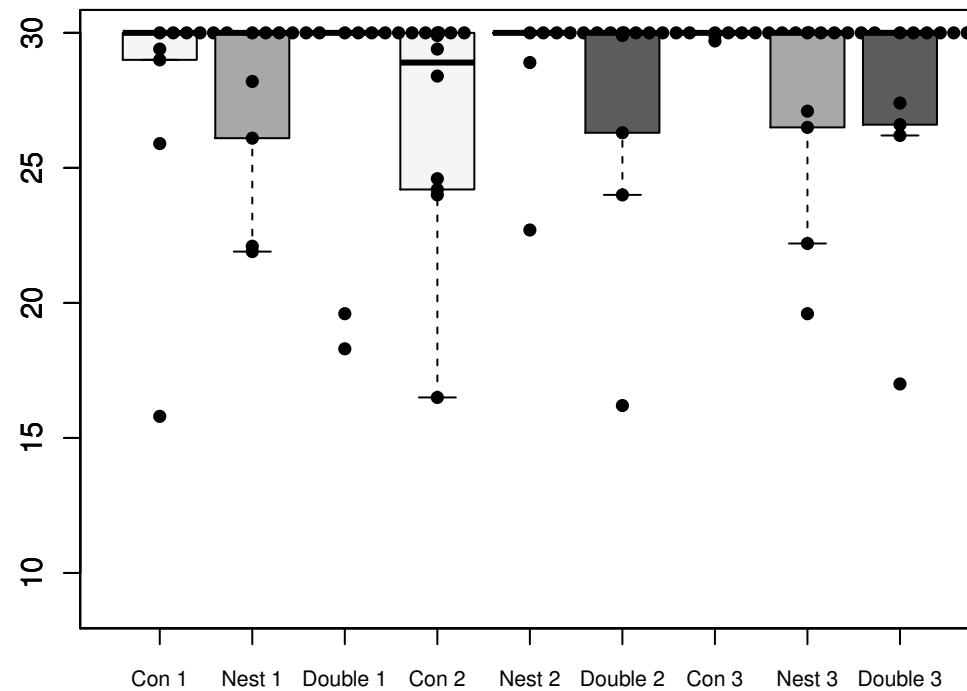

**B6 female**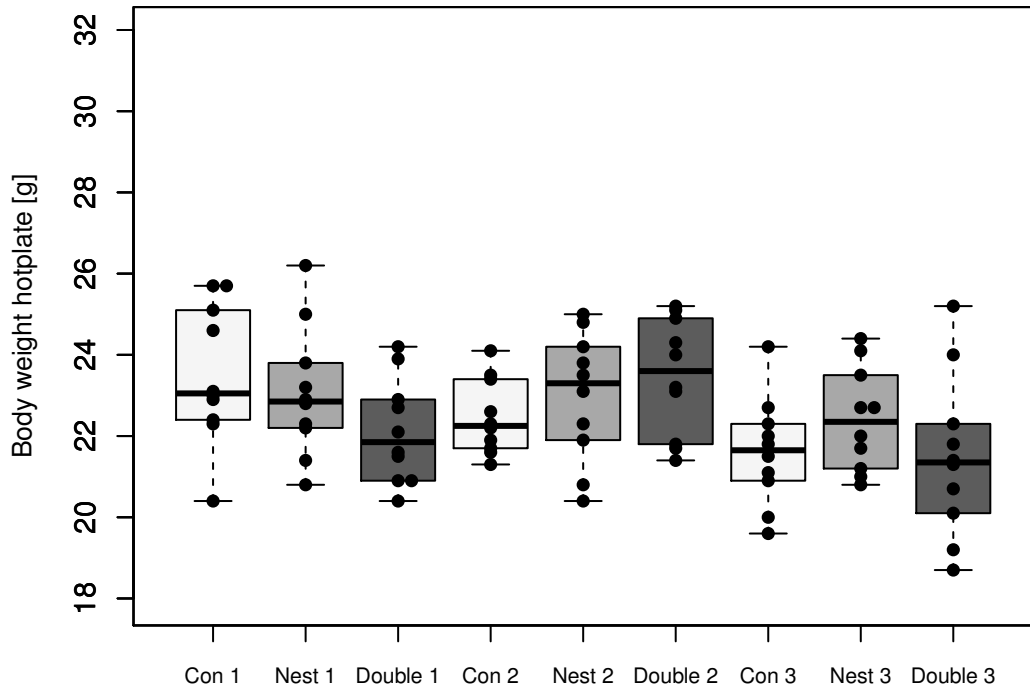**D2 female**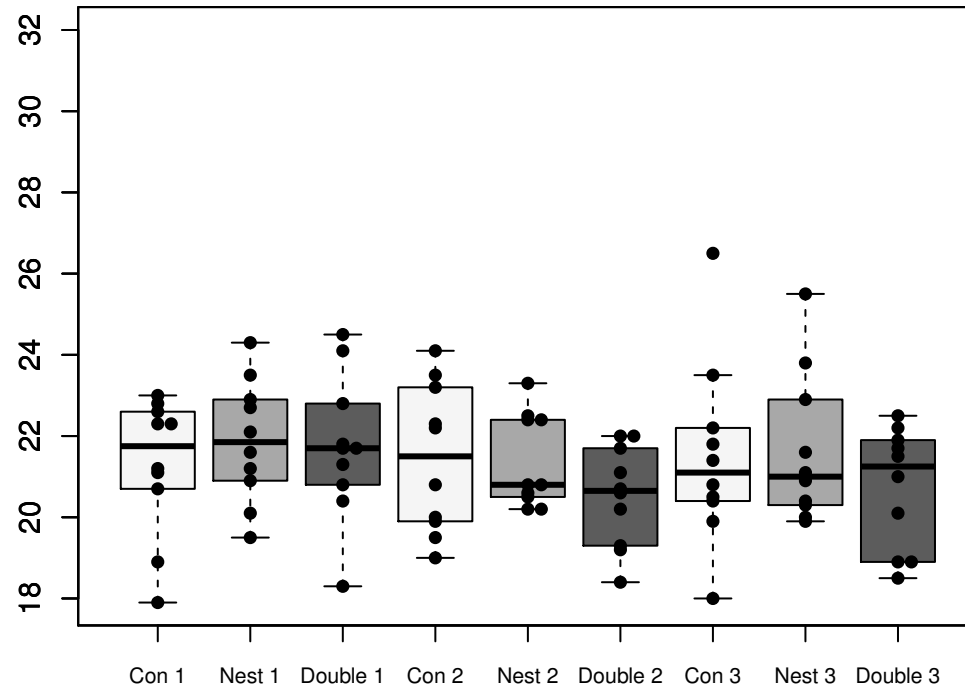**B6 male**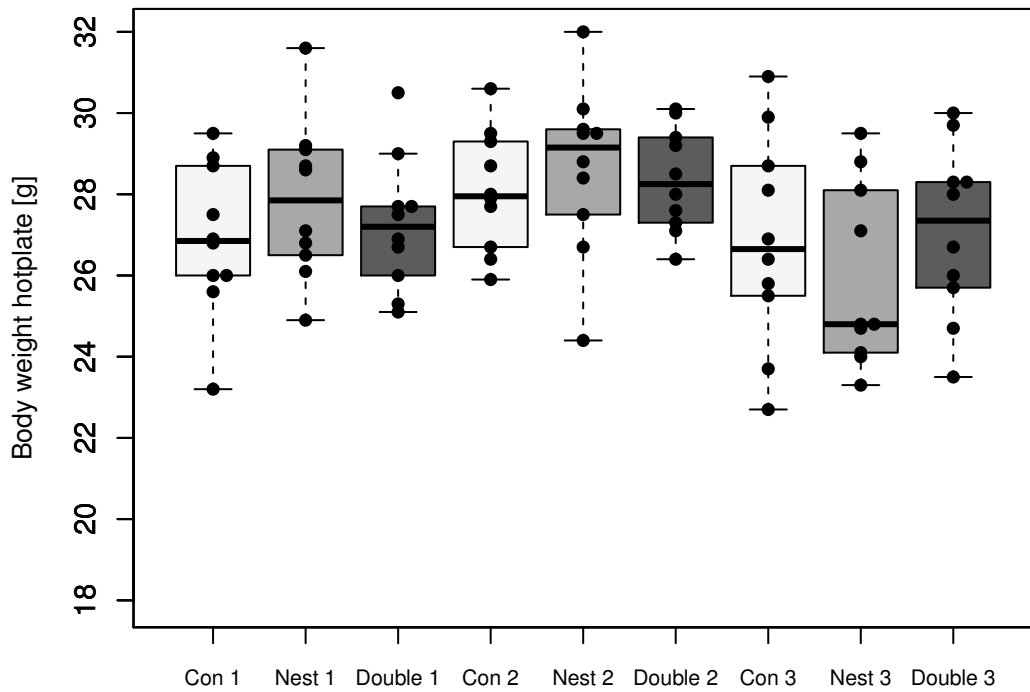**D2 male**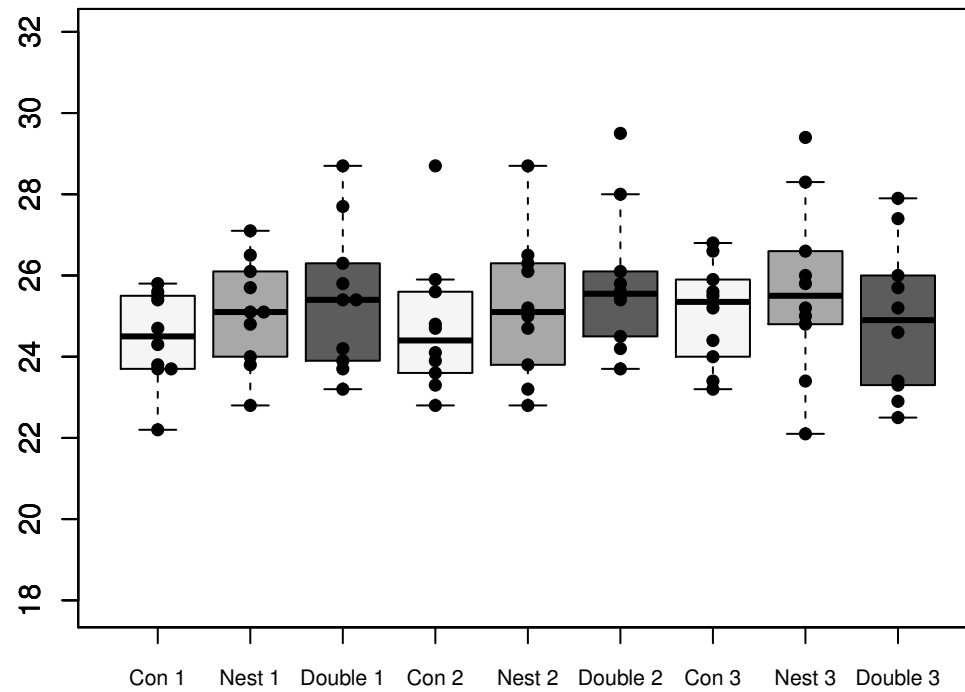

**B6 female**

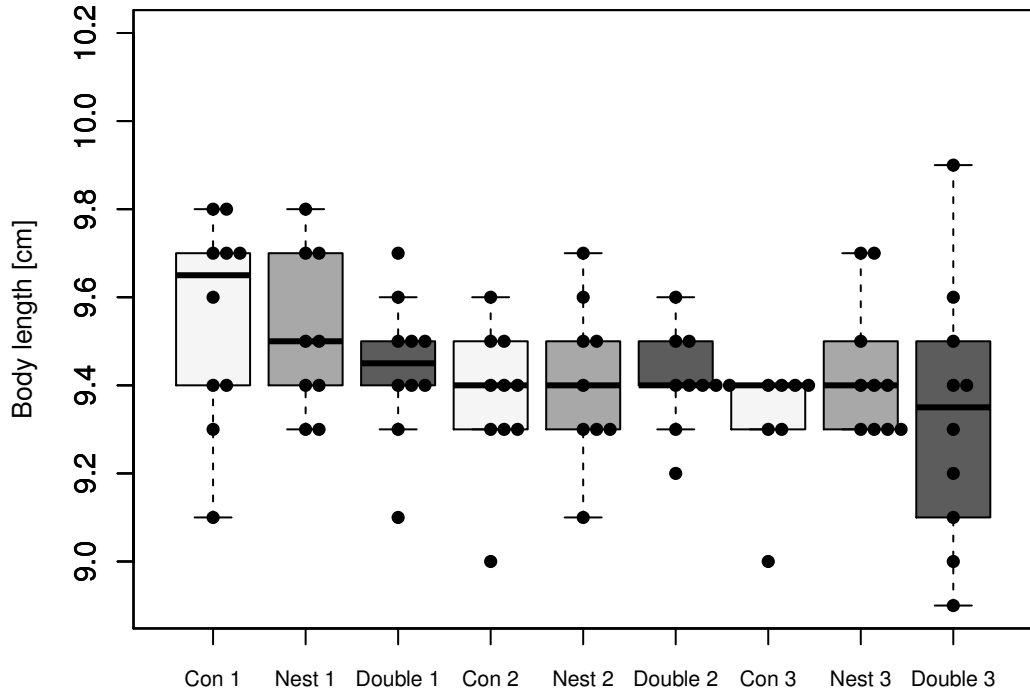

**B6 male**

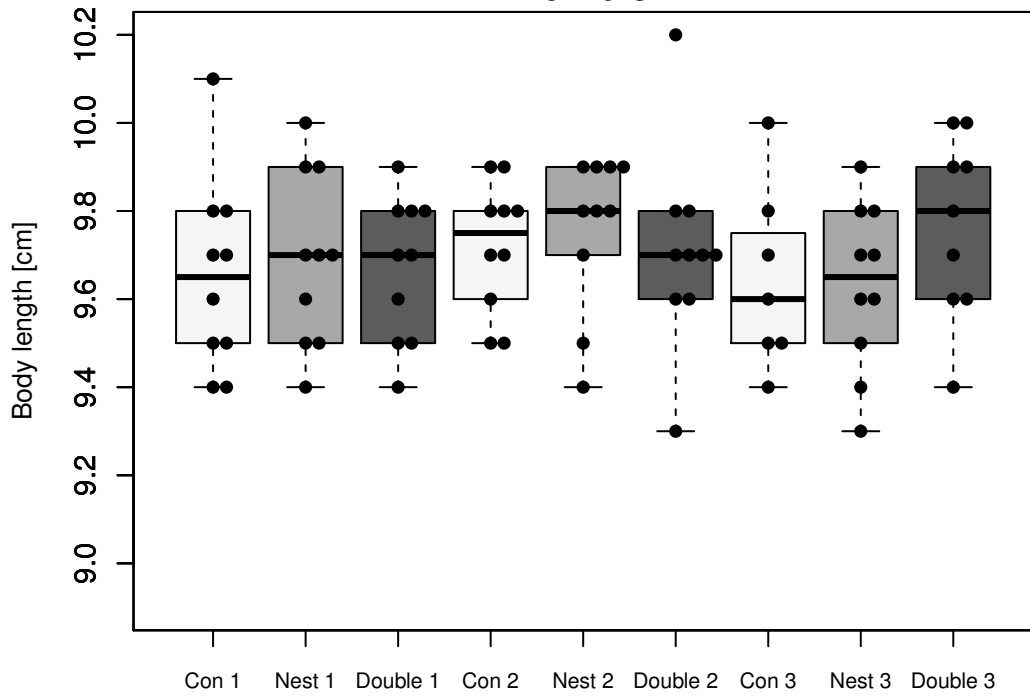

**B6 female**

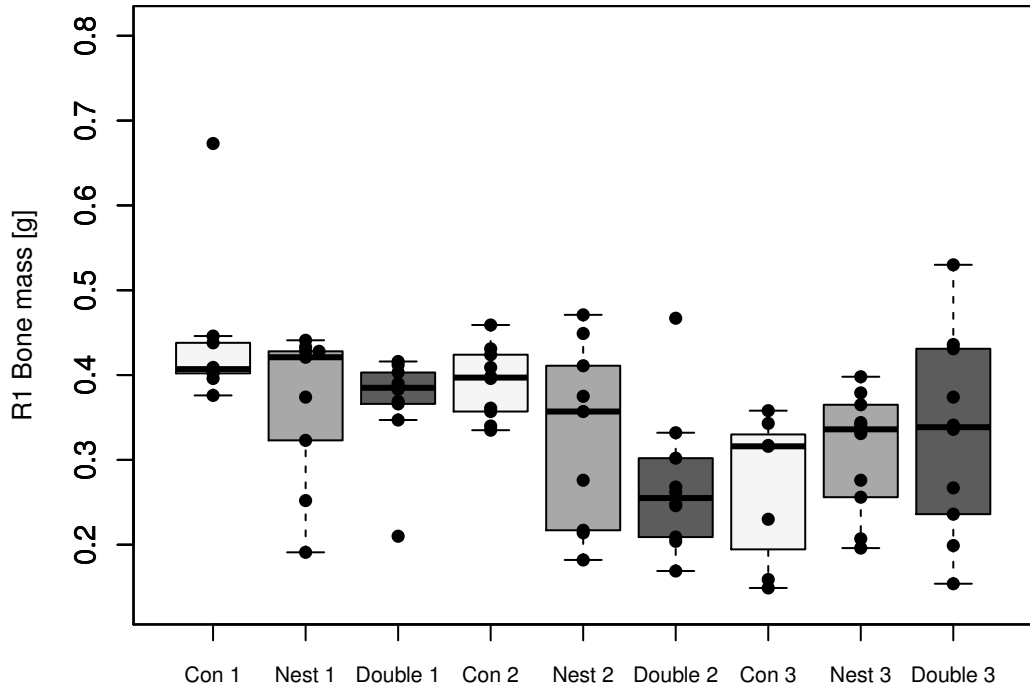

**B6 male**

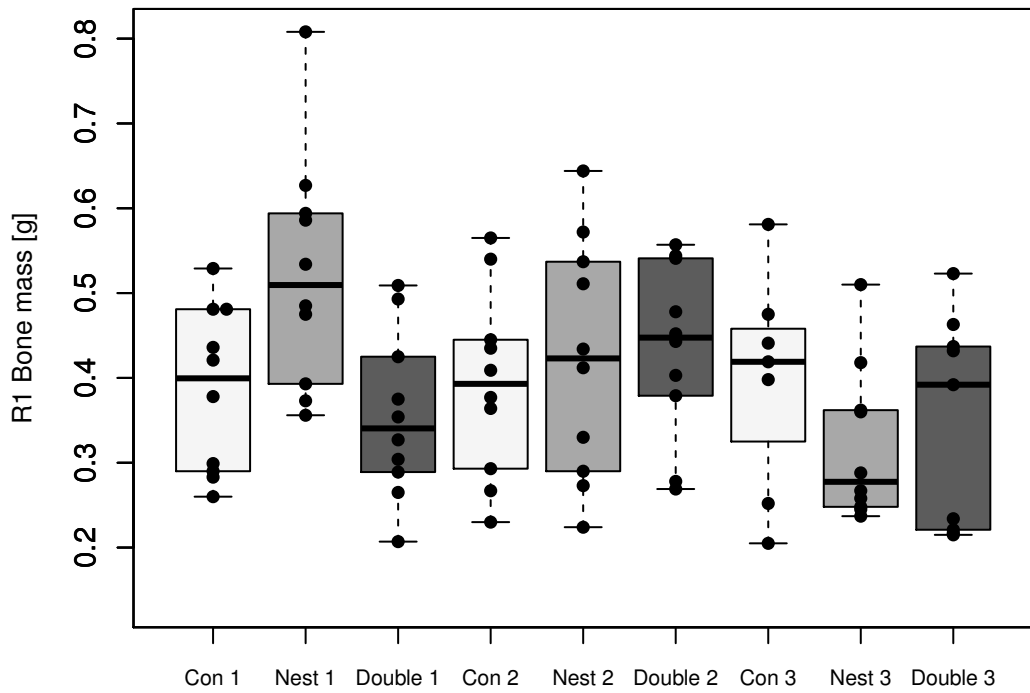

**B6 female**

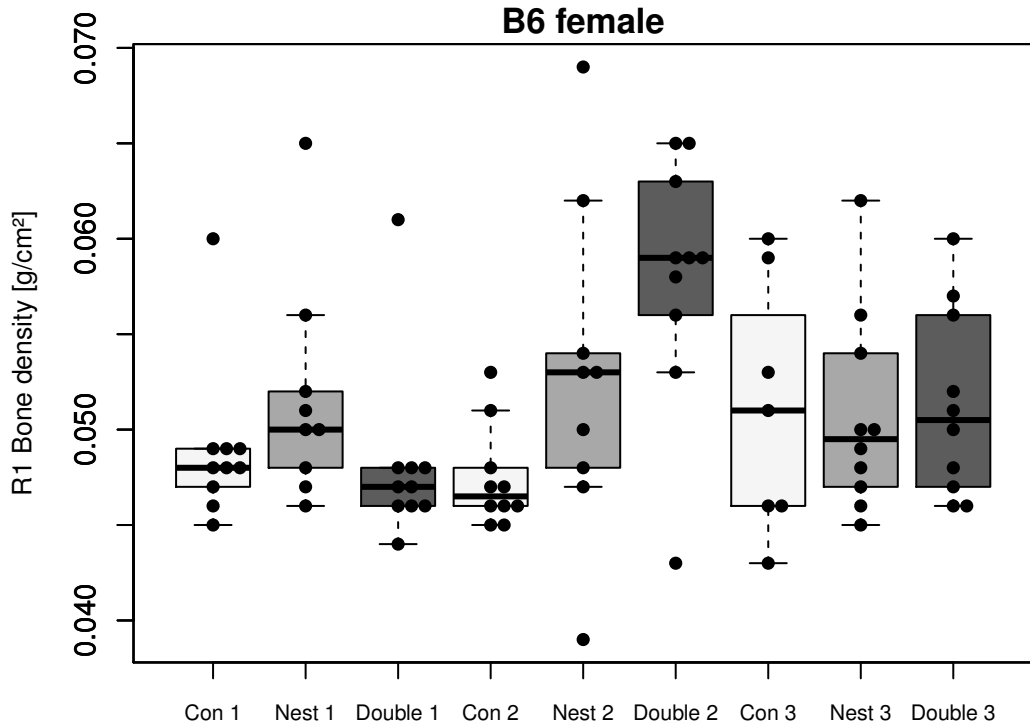

**B6 male**

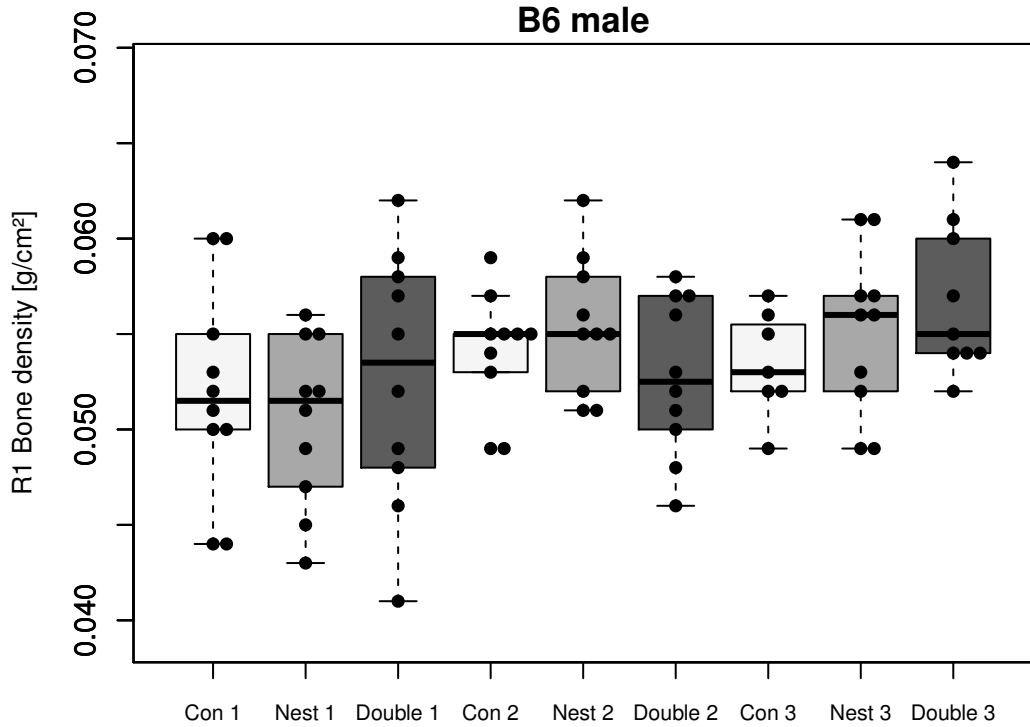



**B6 female**

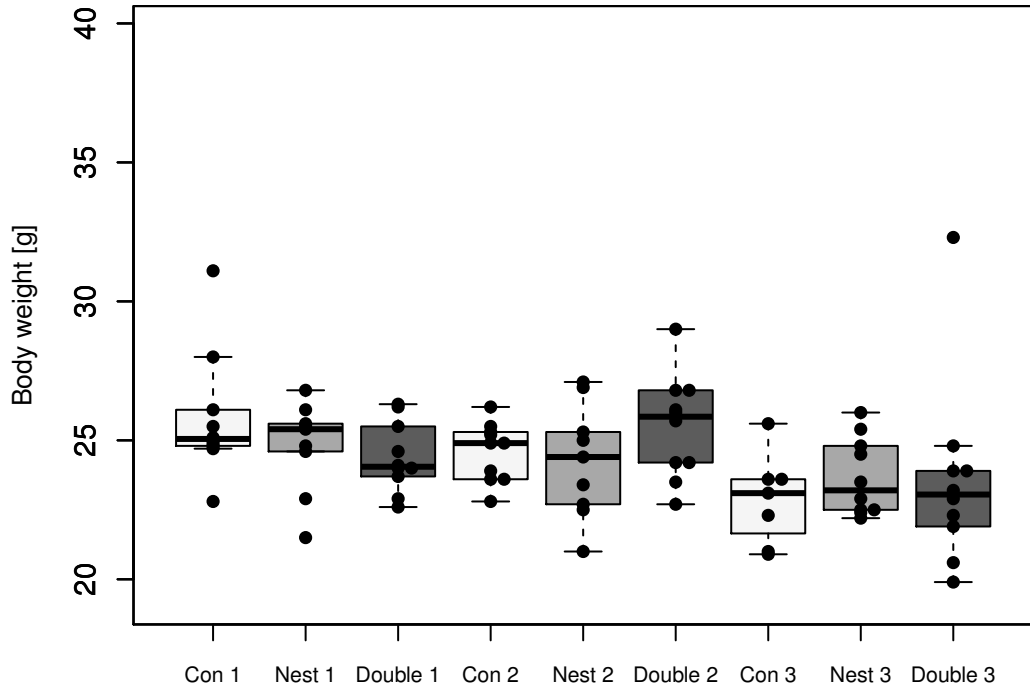

**B6 male**

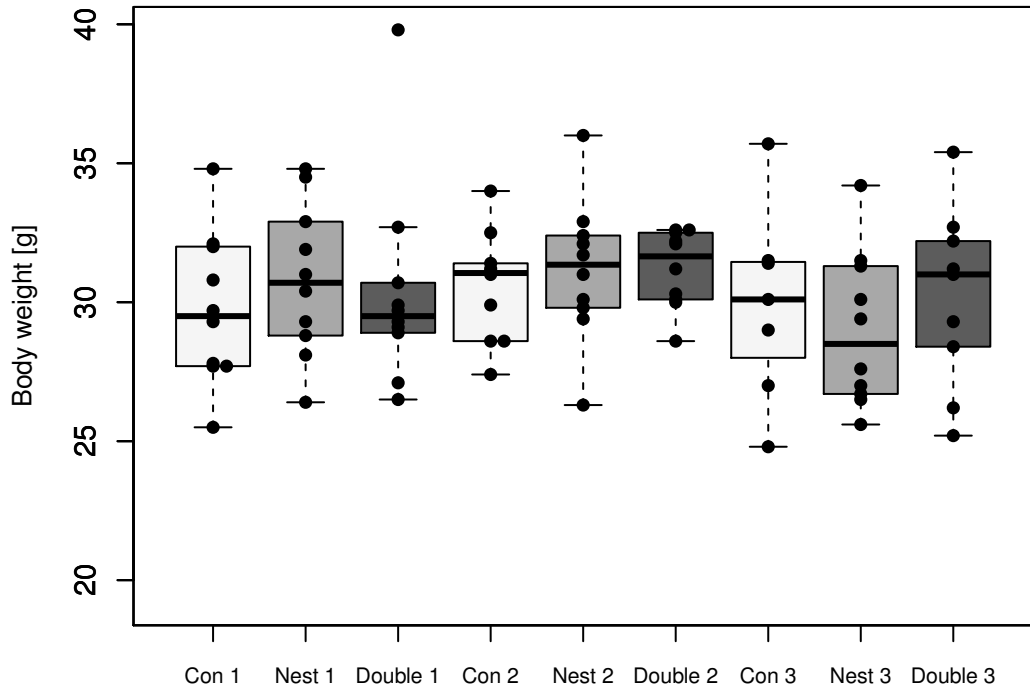

**B6 female**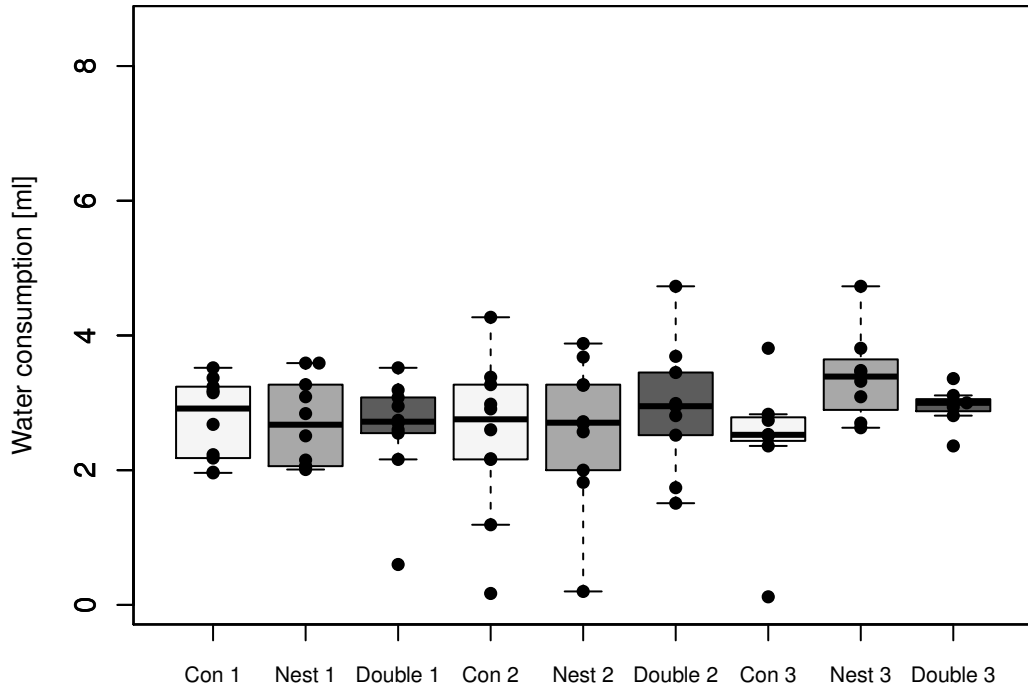**D2 female**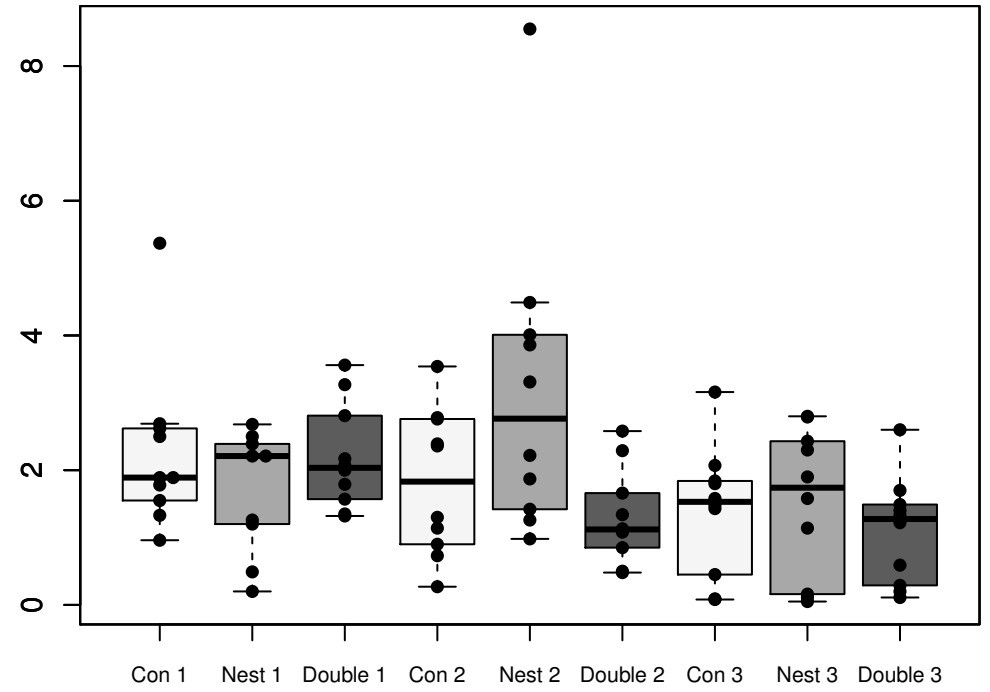**B6 male**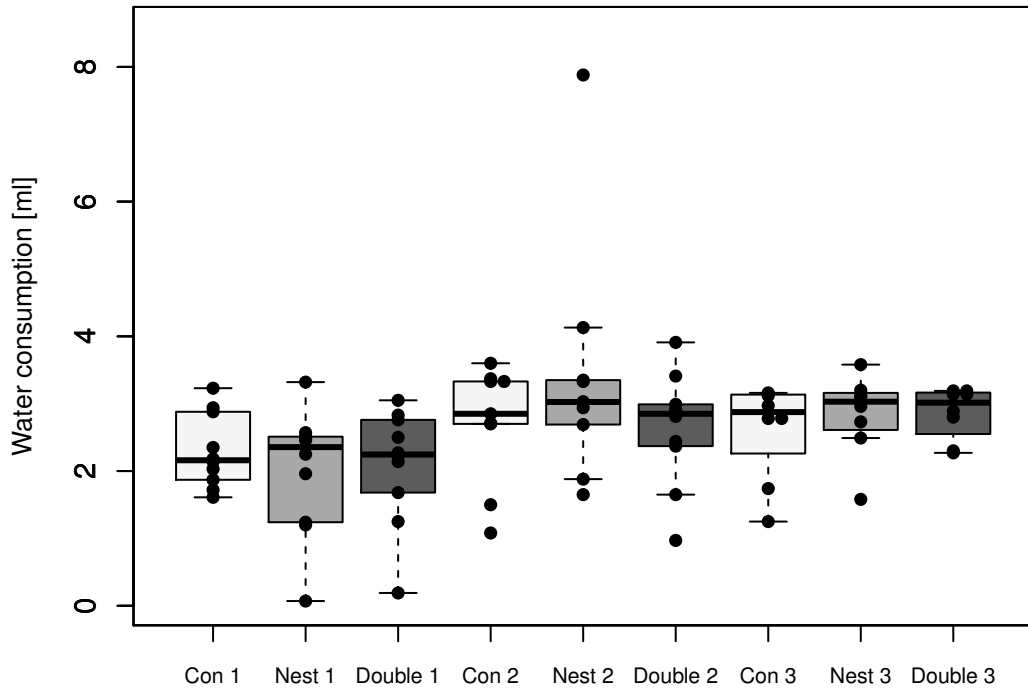**D2 male**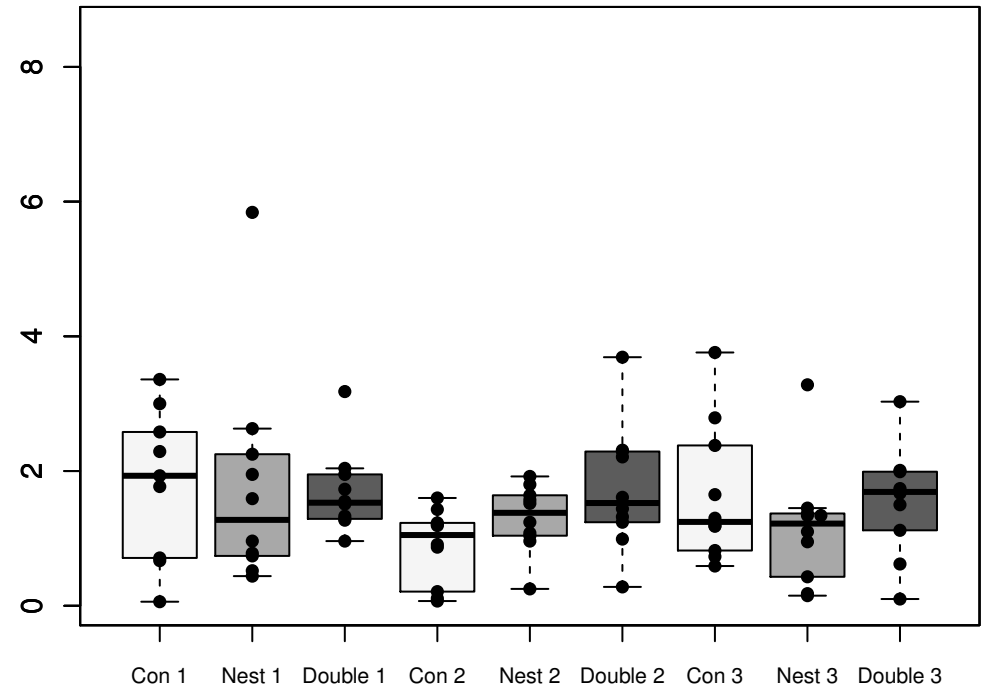

**B6 female**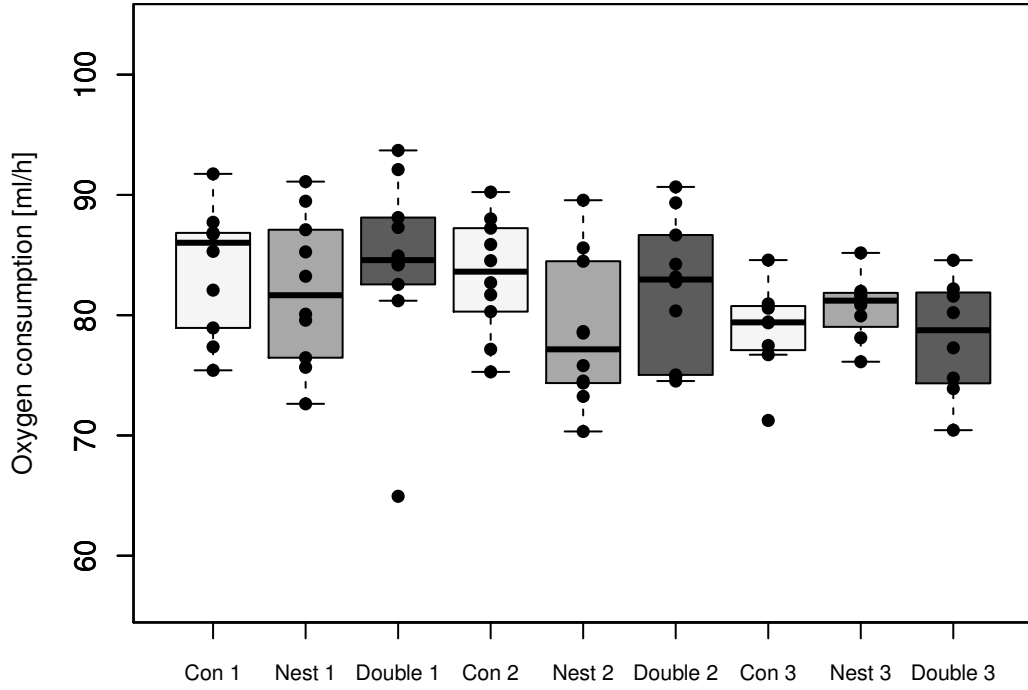**D2 female**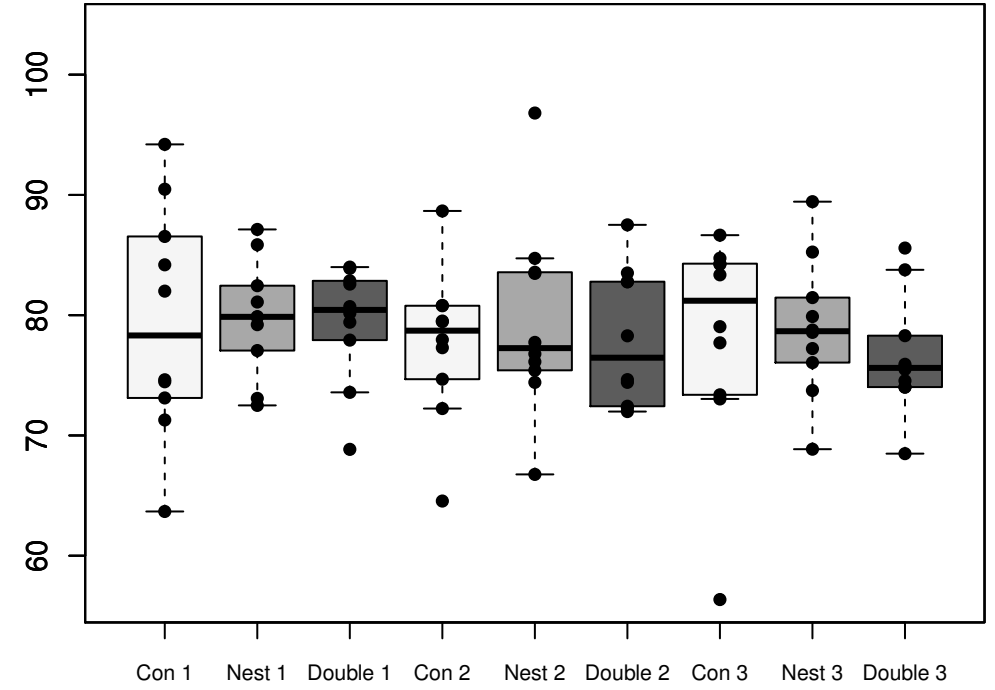**B6 male**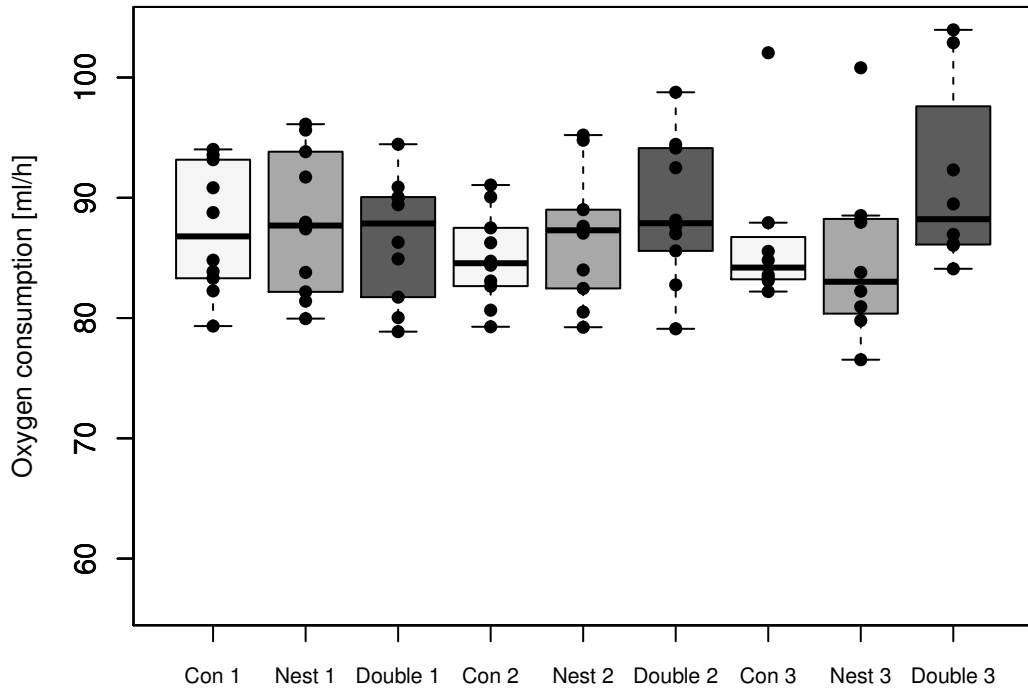**D2 male**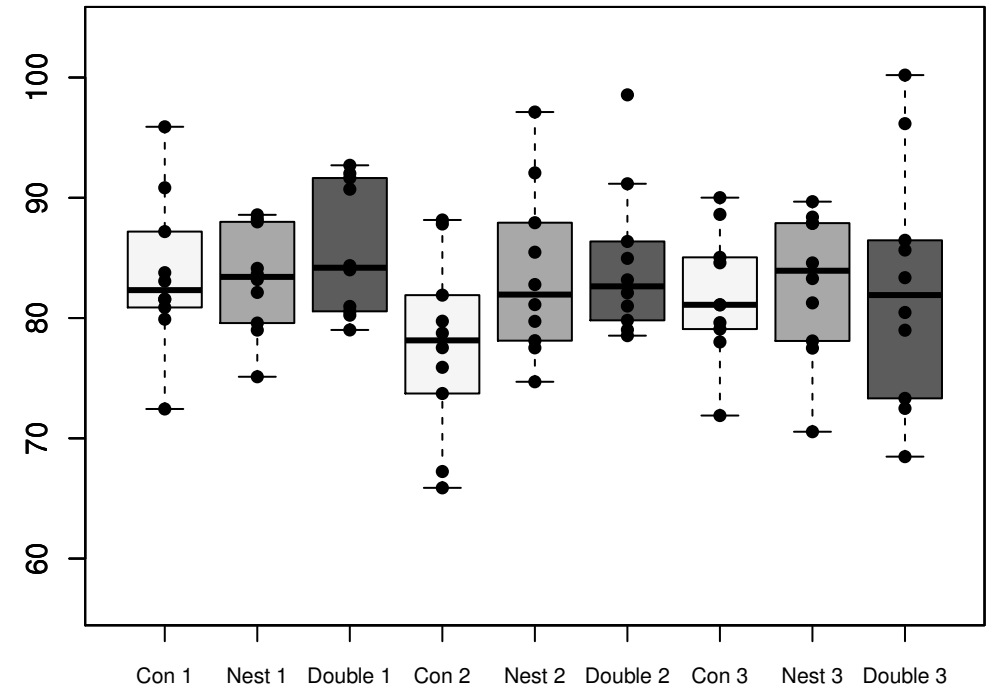

**B6 female**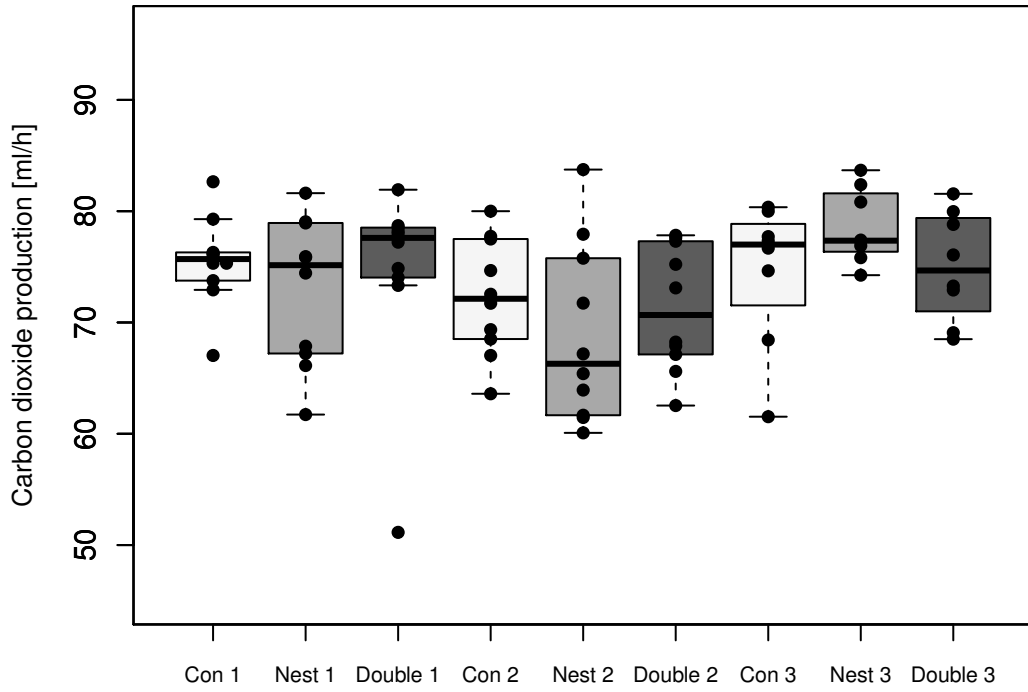**D2 female**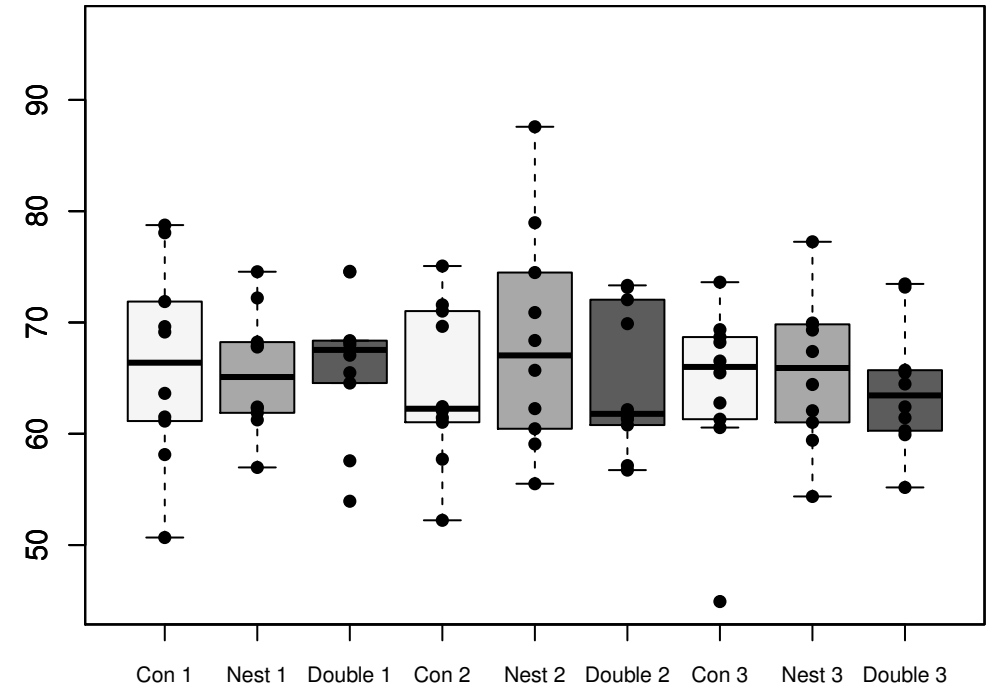**B6 male**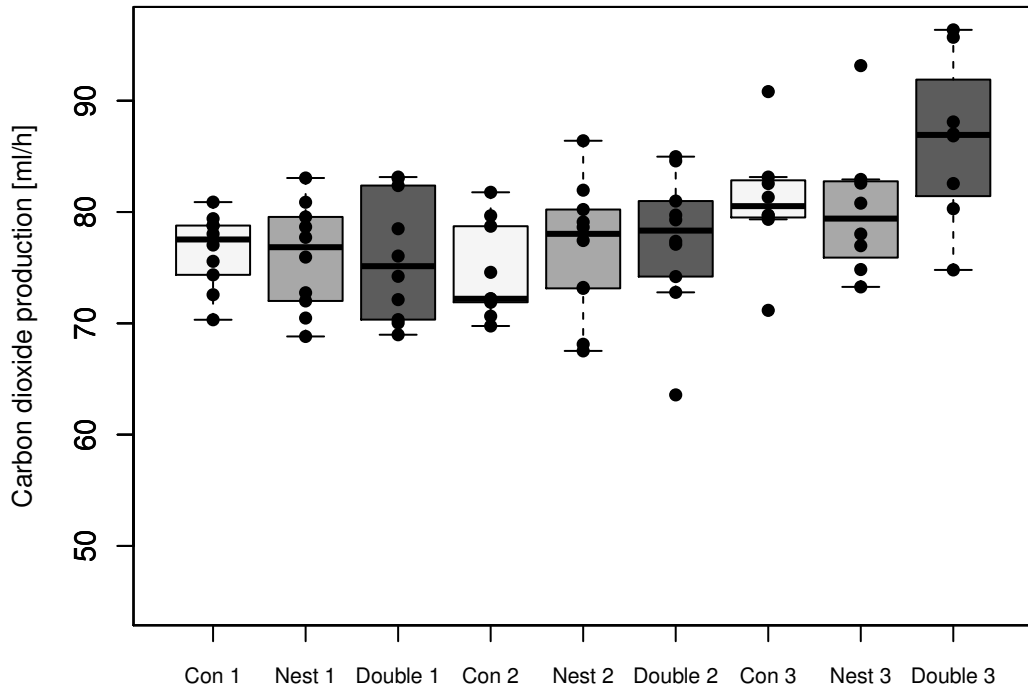**D2 male**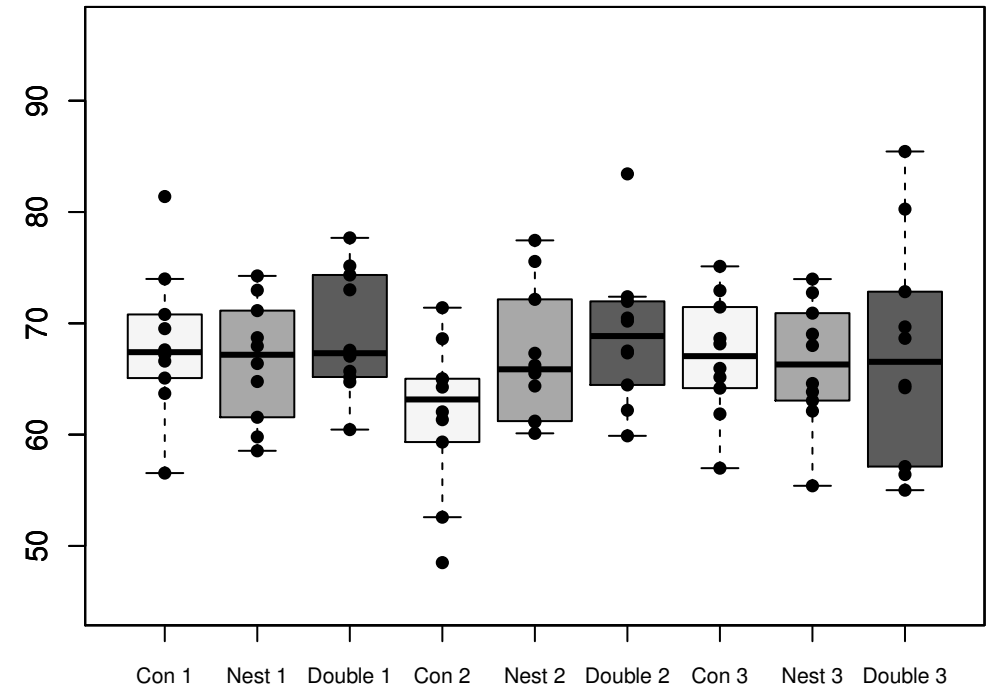

**B6 female**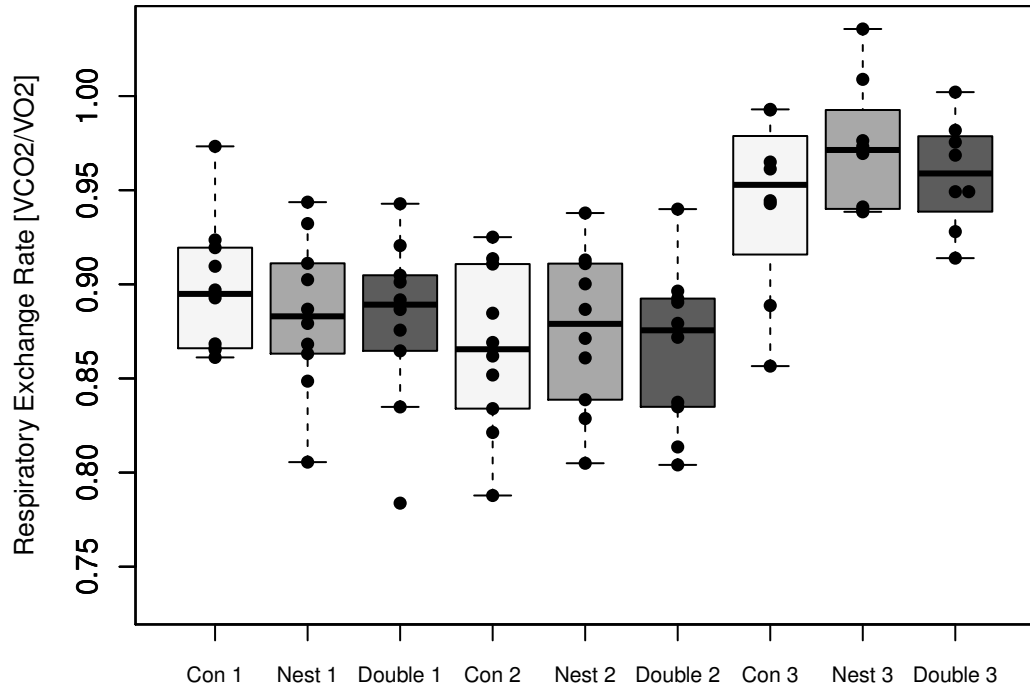**D2 female**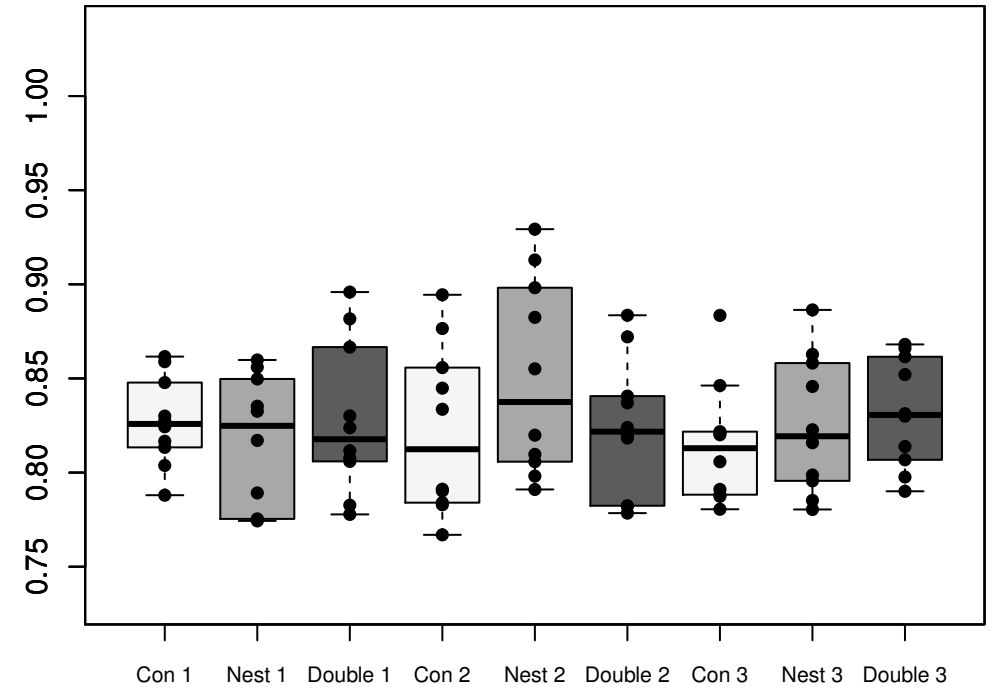**B6 male**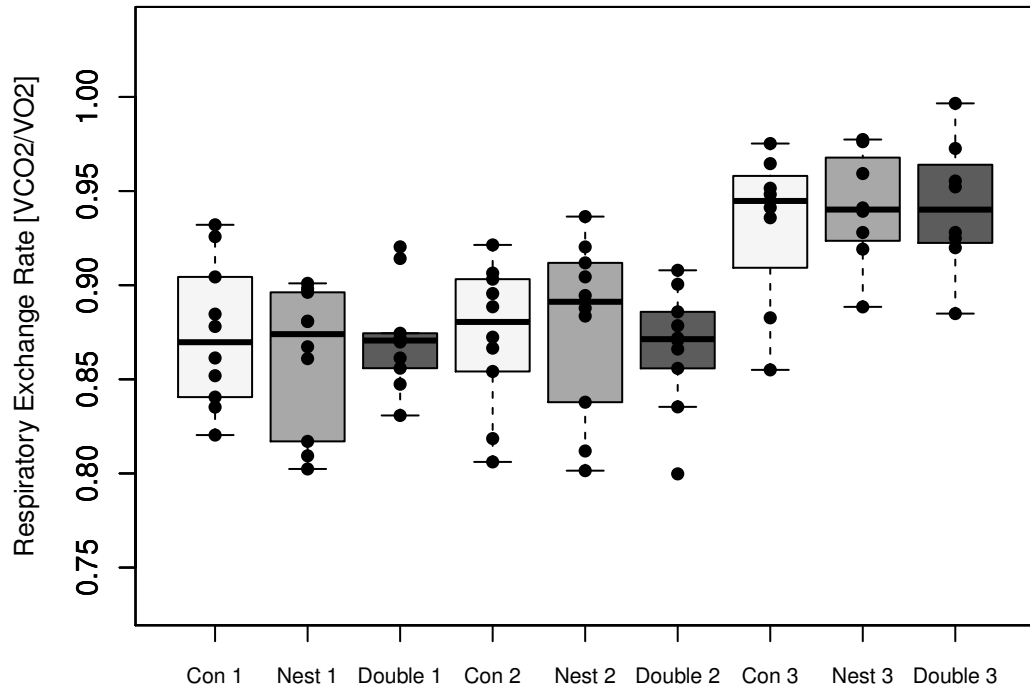**D2 male**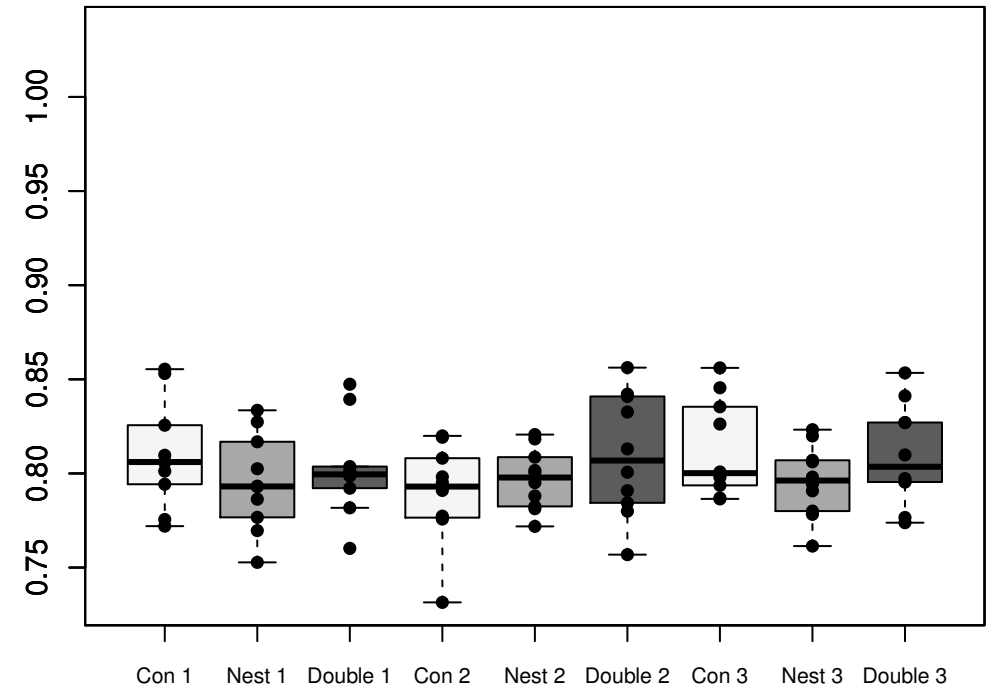

**B6 female**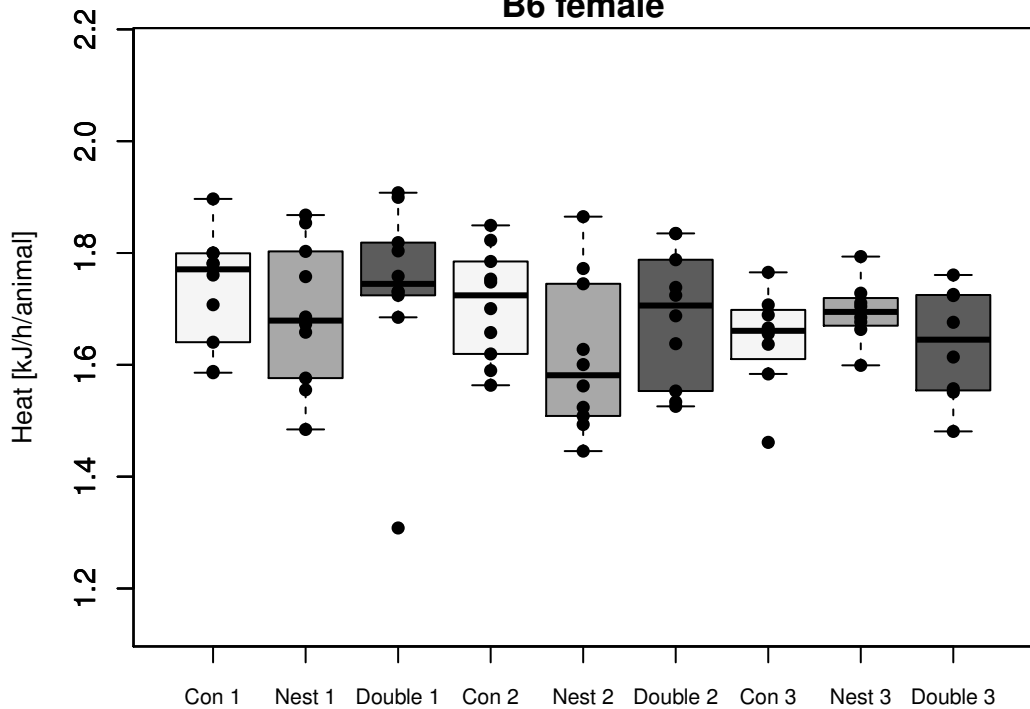**D2 female**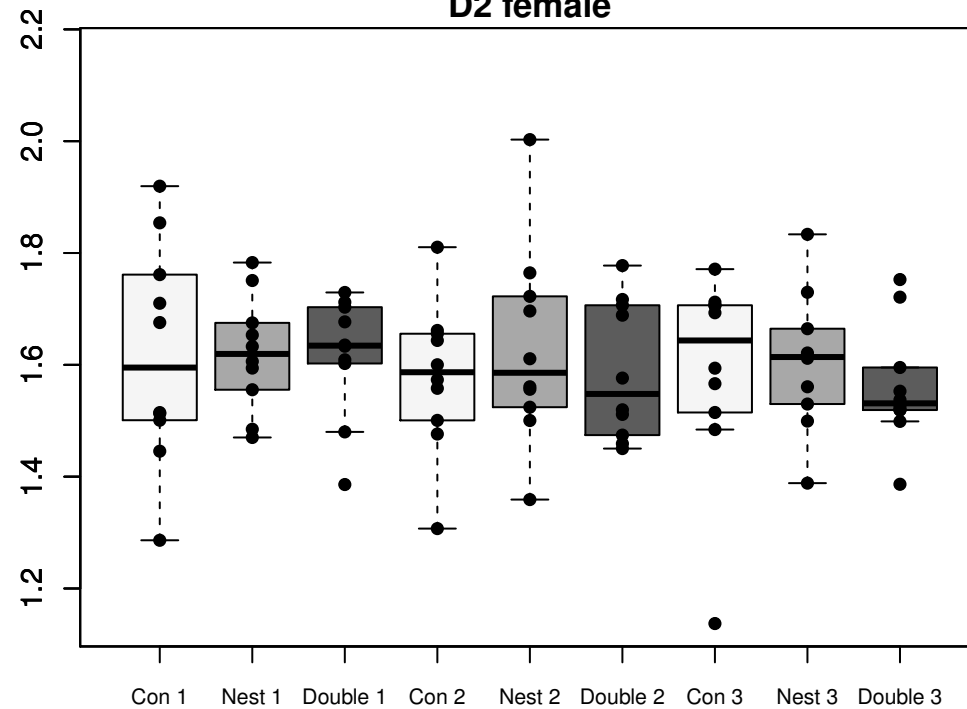**B6 male**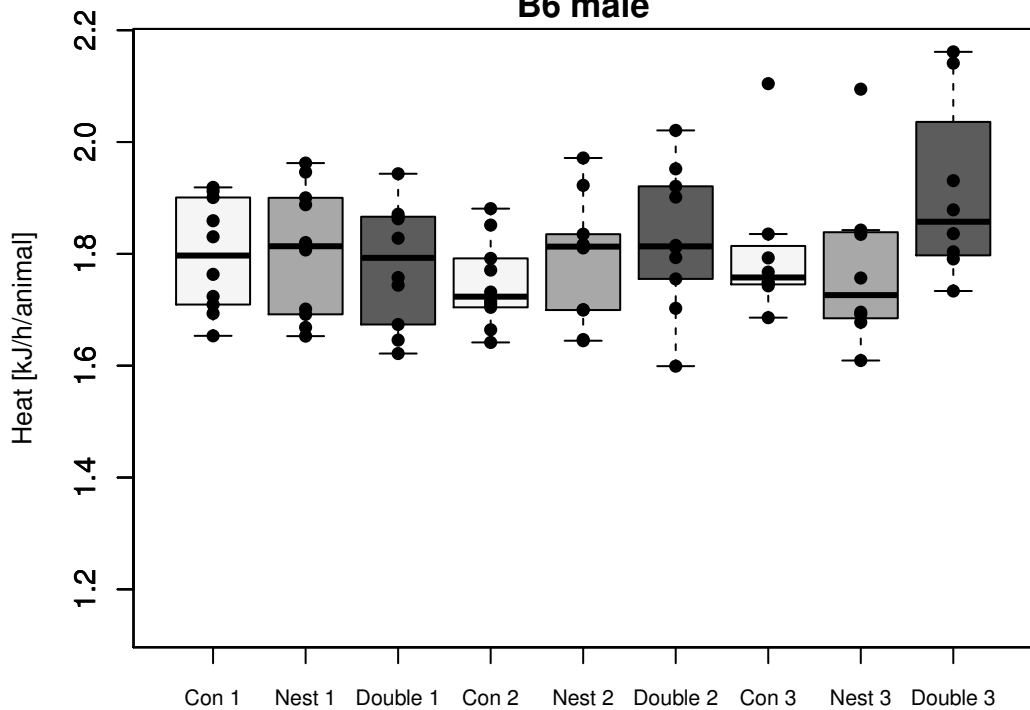**D2 male**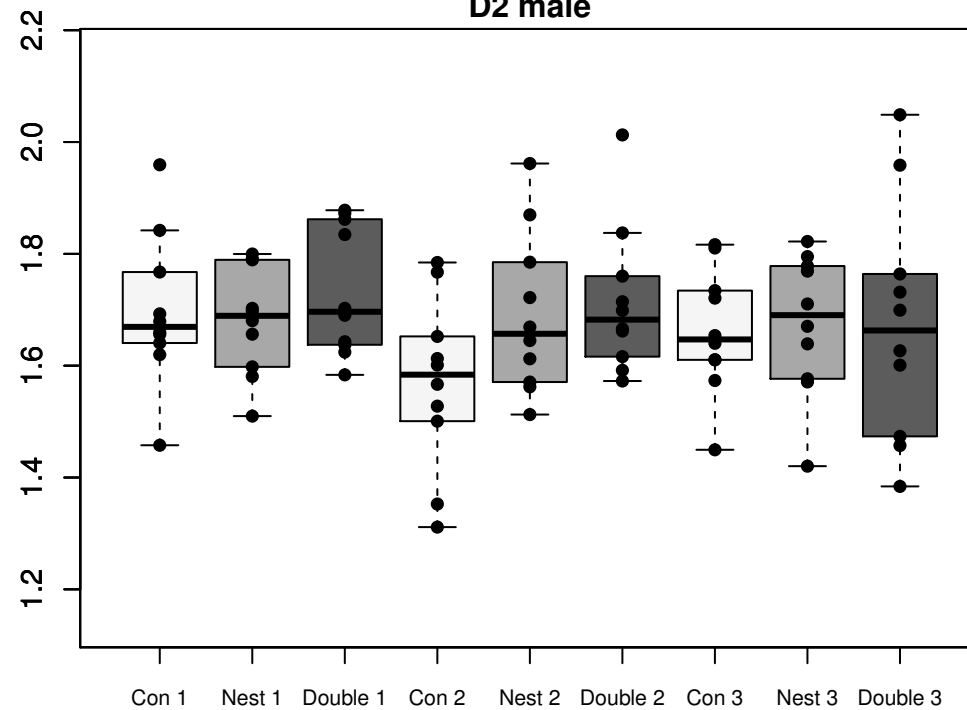

**B6 female**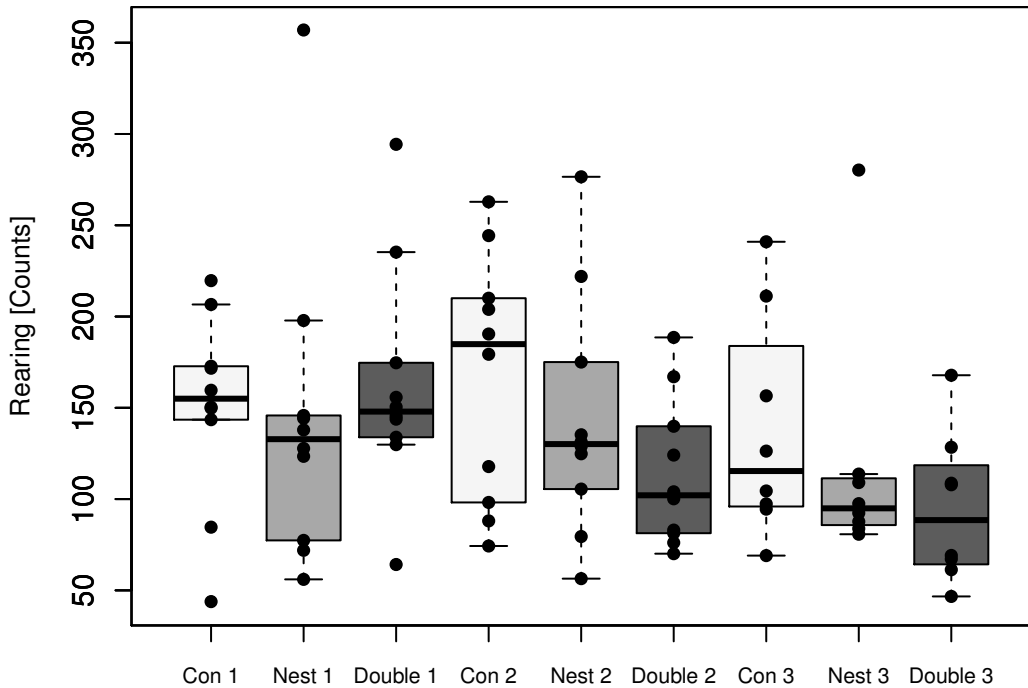**D2 female**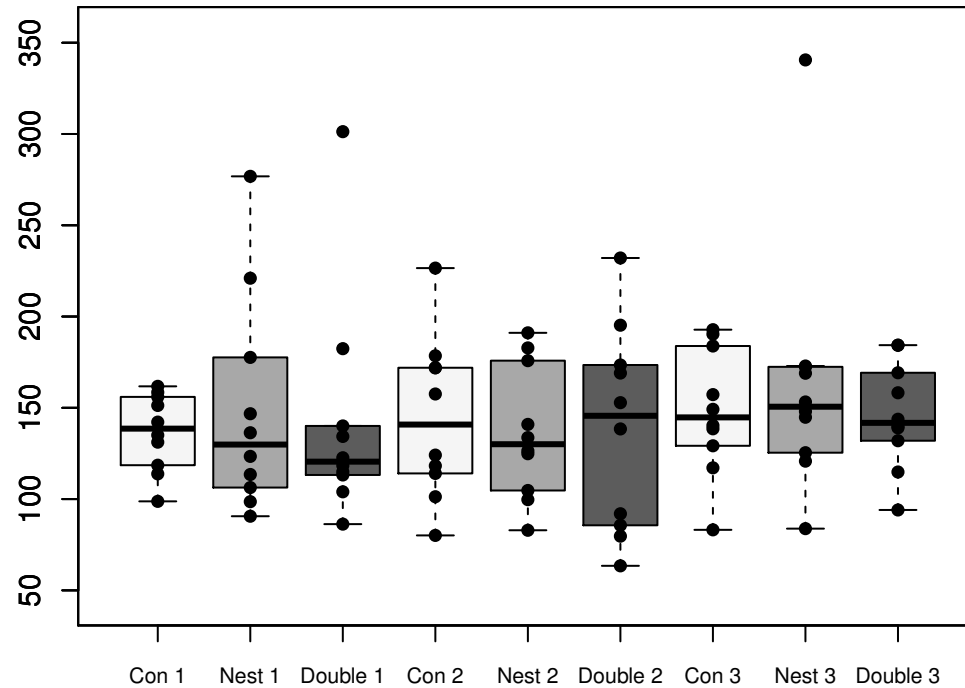**B6 male**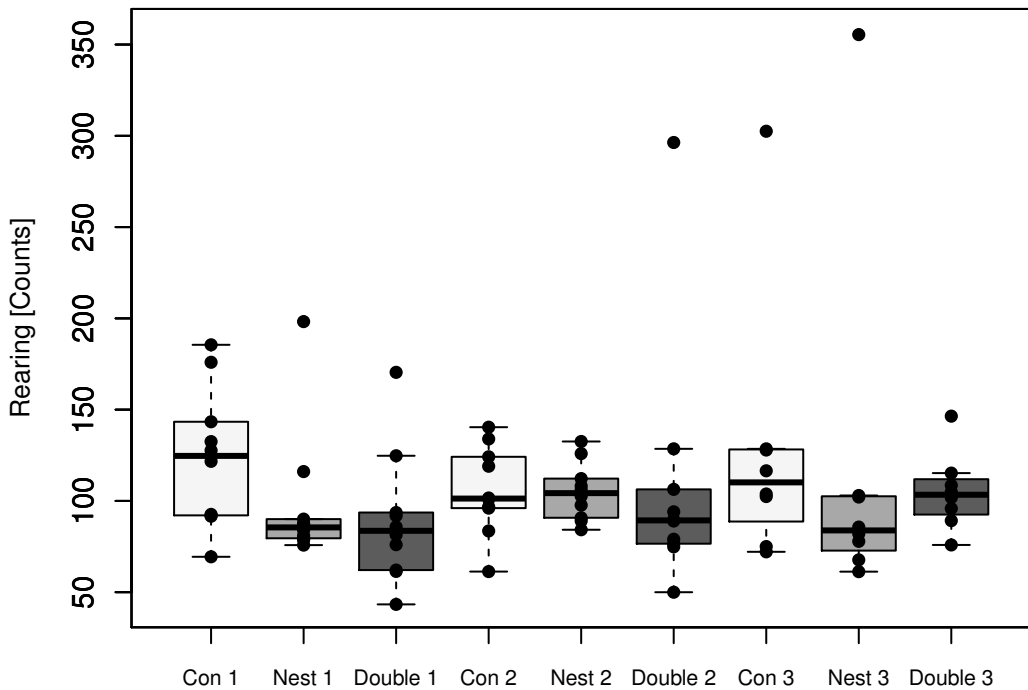**D2 male**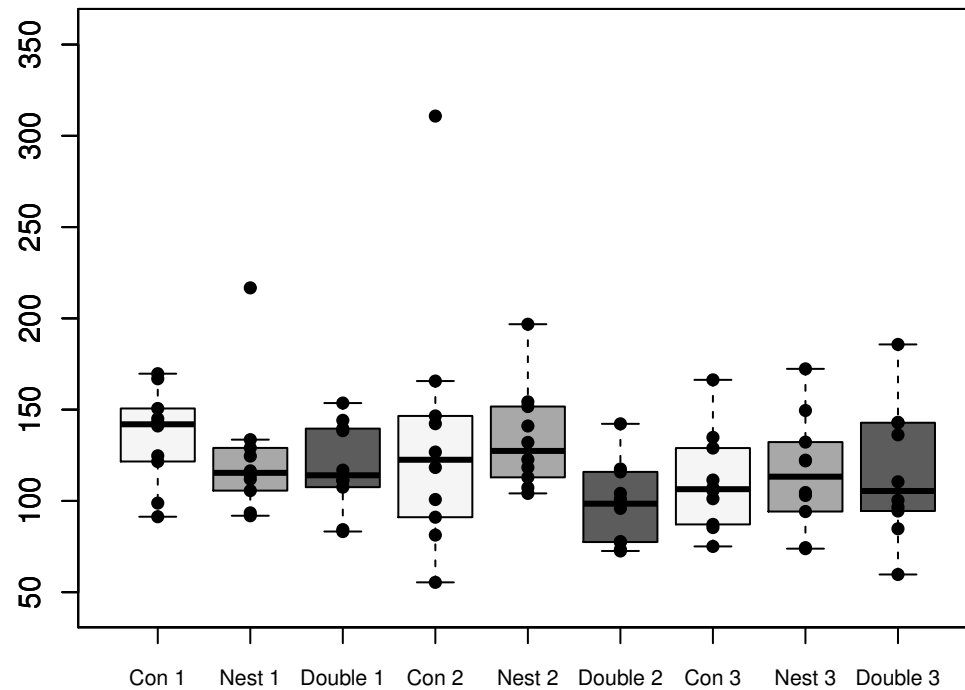

**B6 female**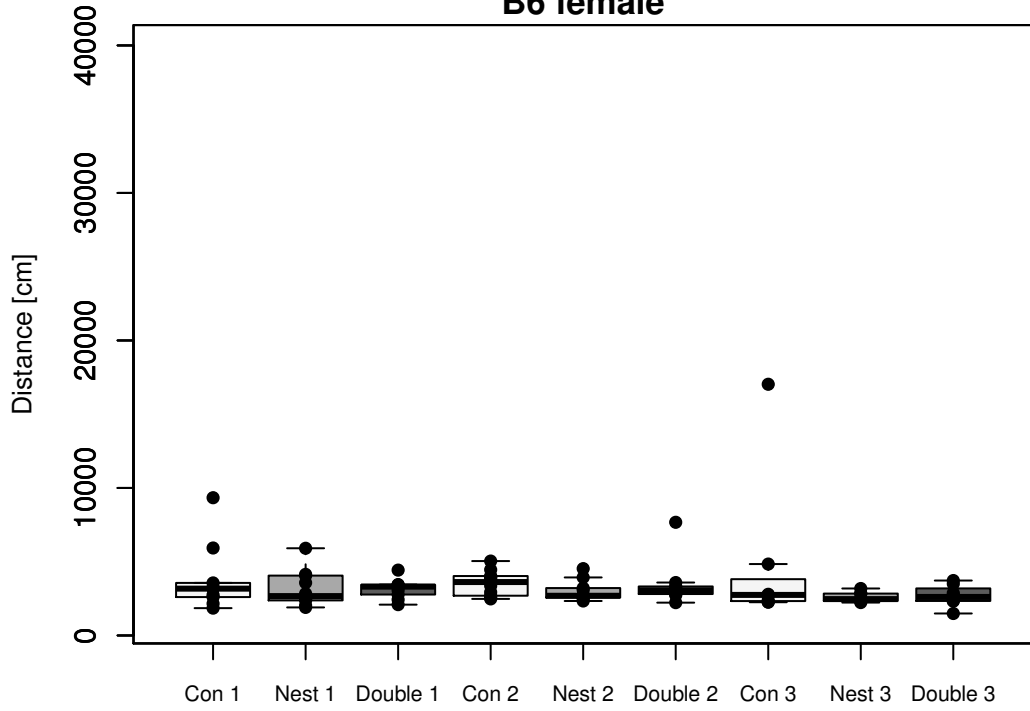**D2 female**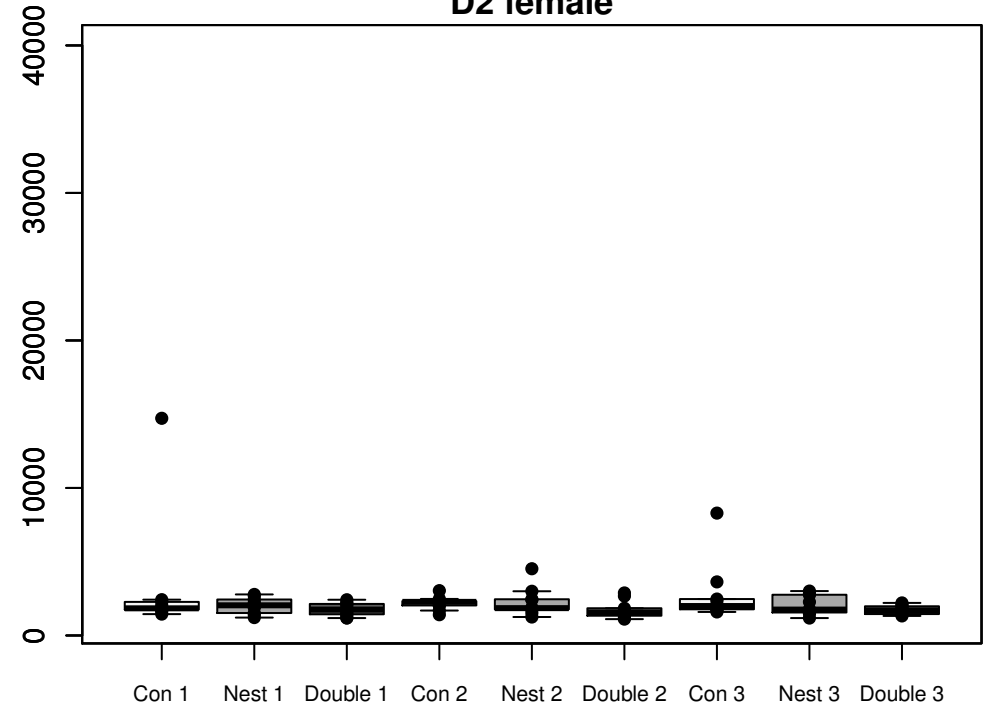**B6 male**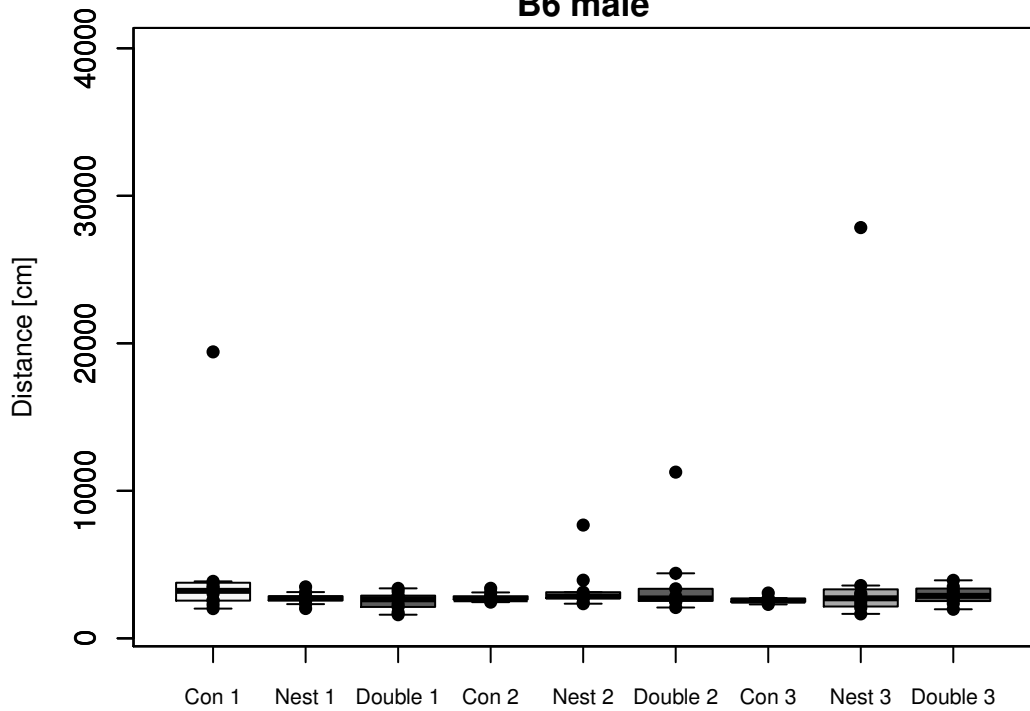**D2 male**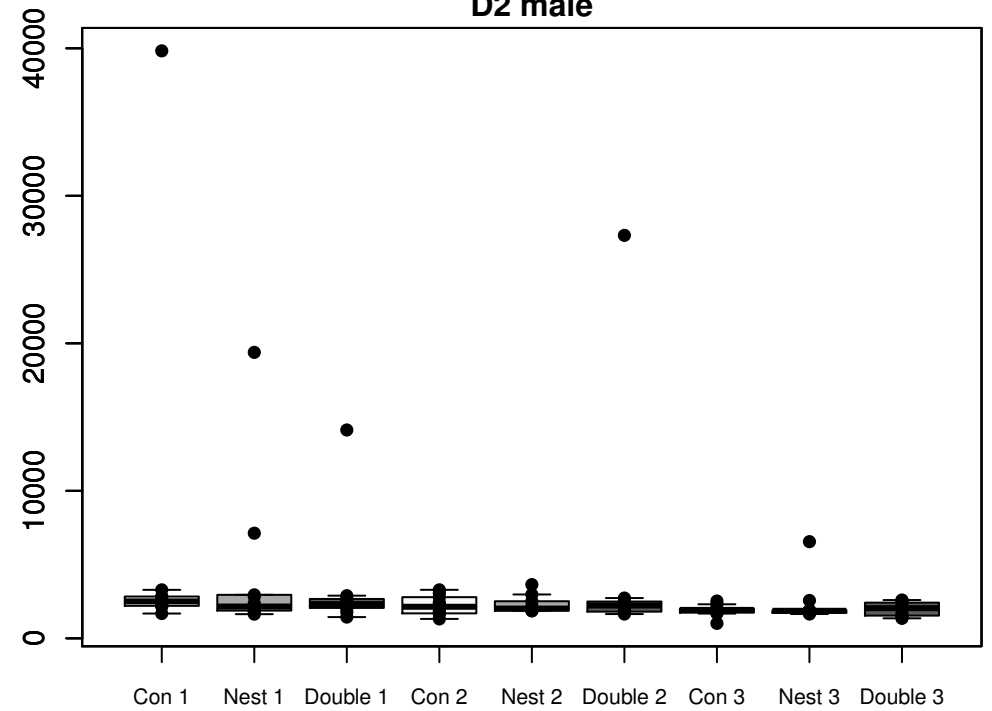



**B6 female**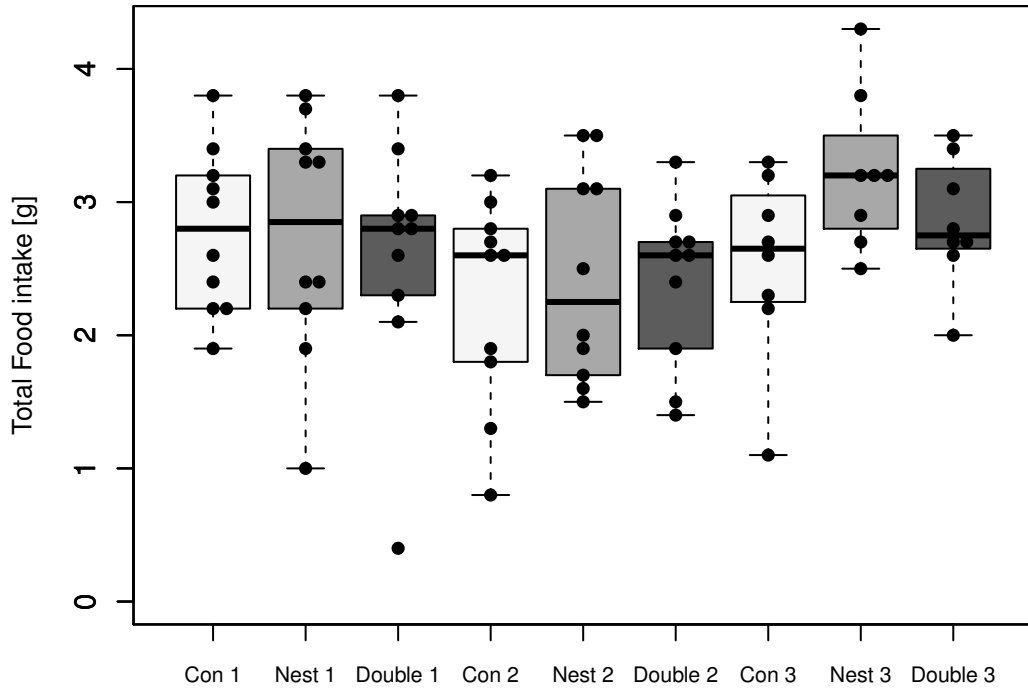**D2 female**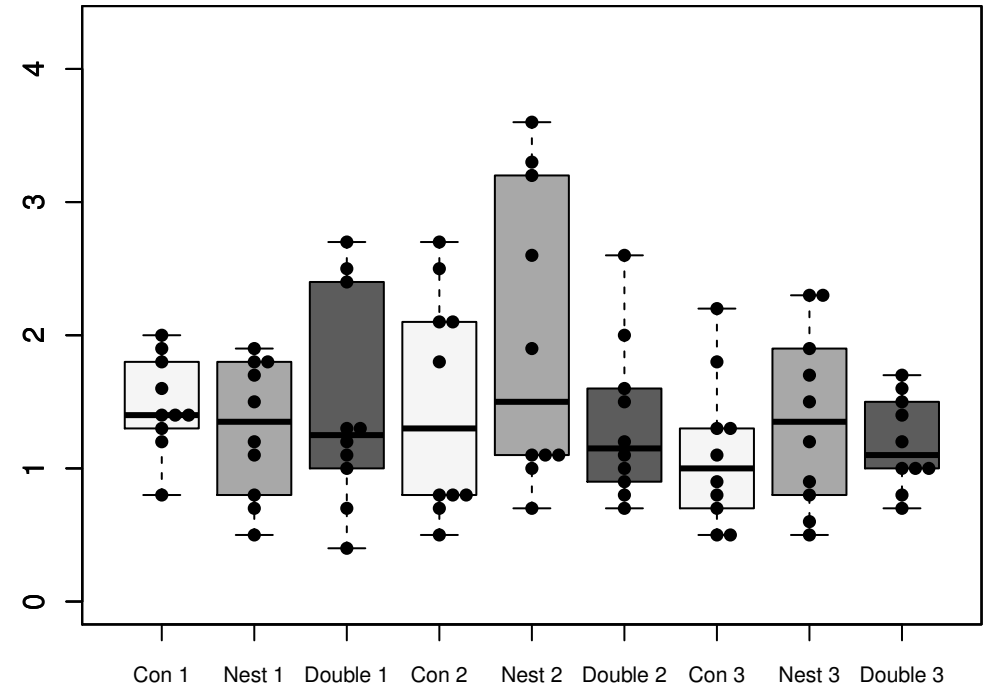**B6 male**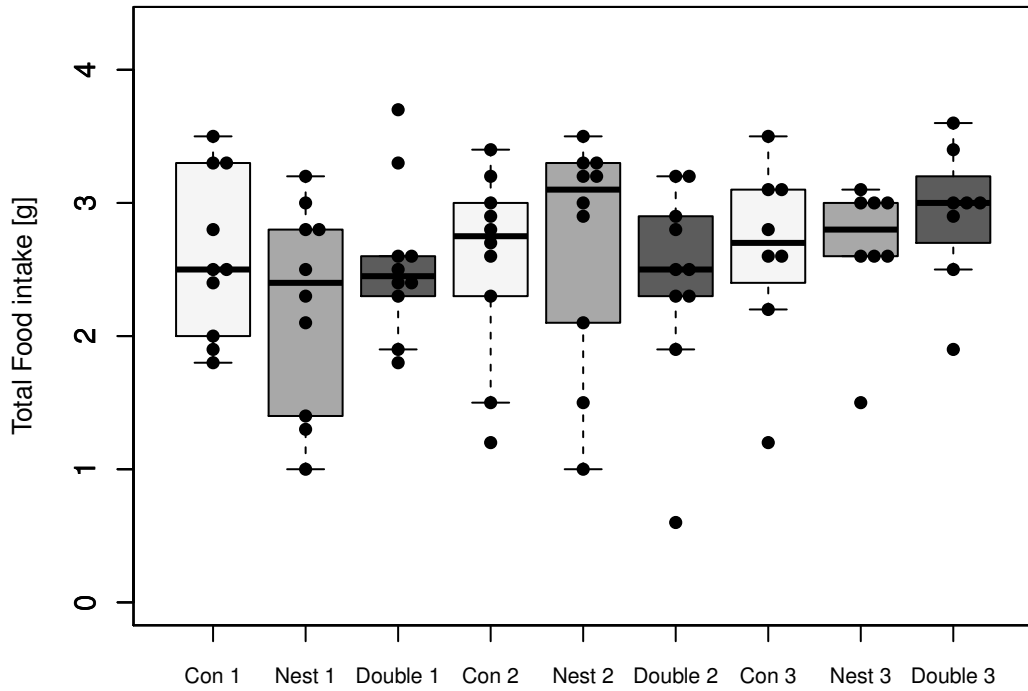**D2 male**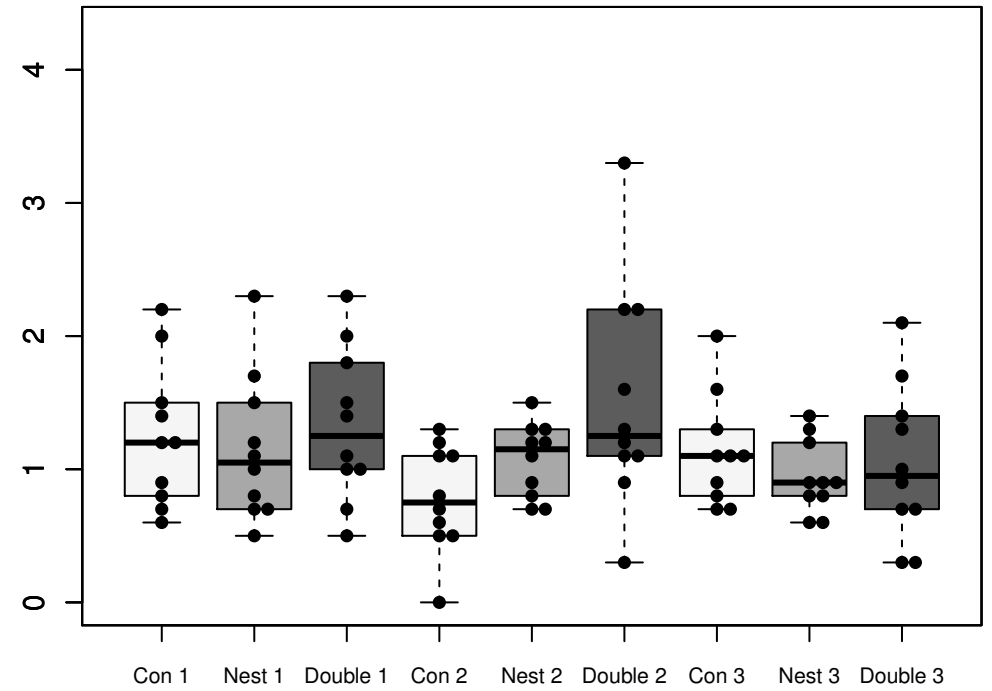

**B6 female**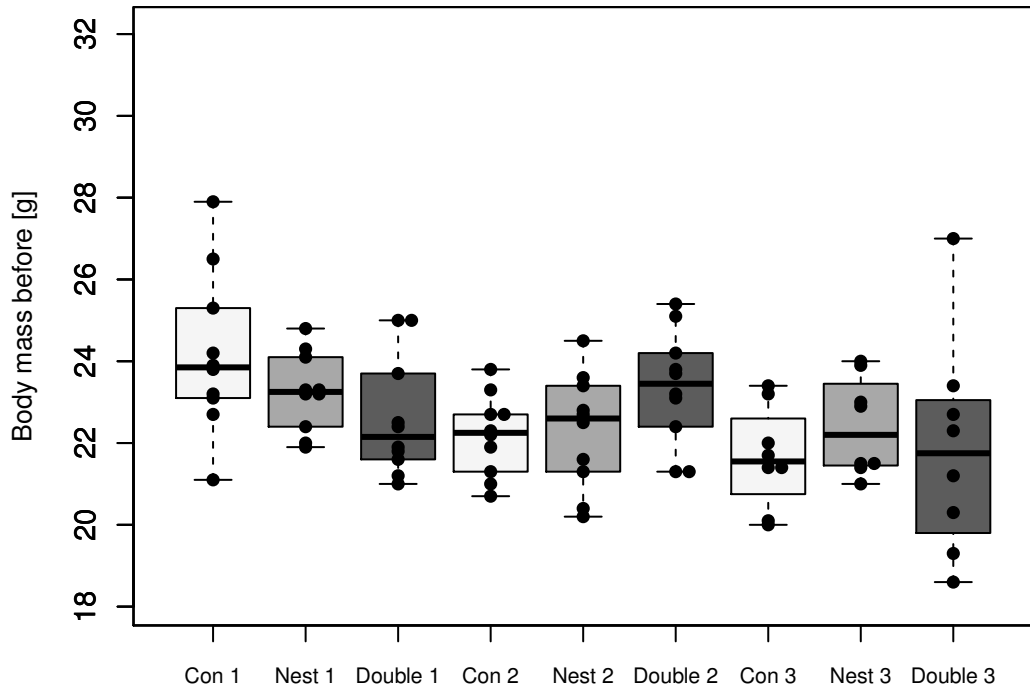**D2 female**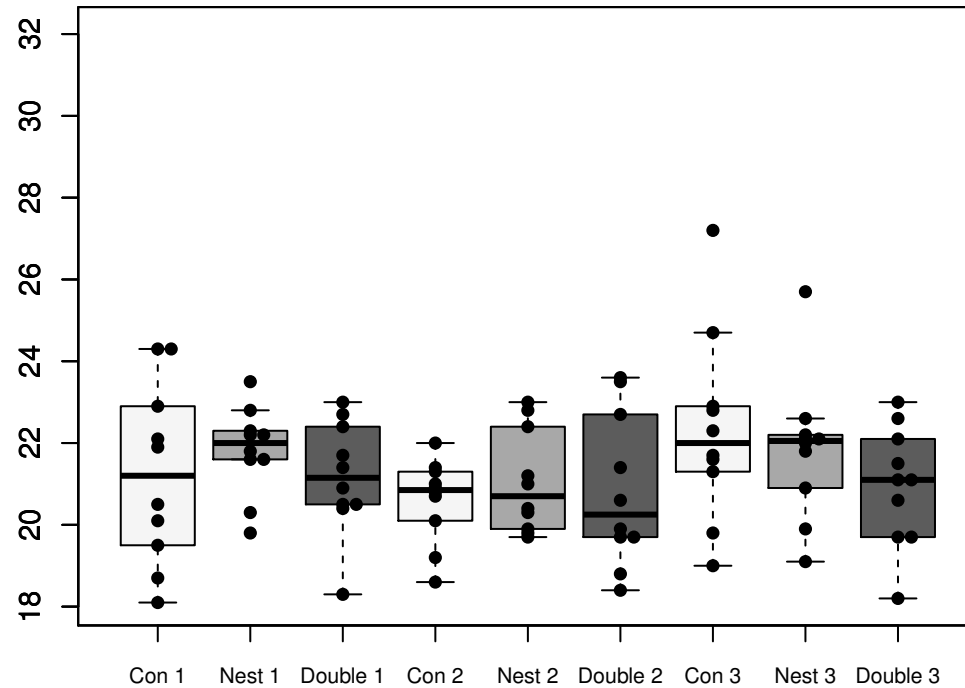**B6 male**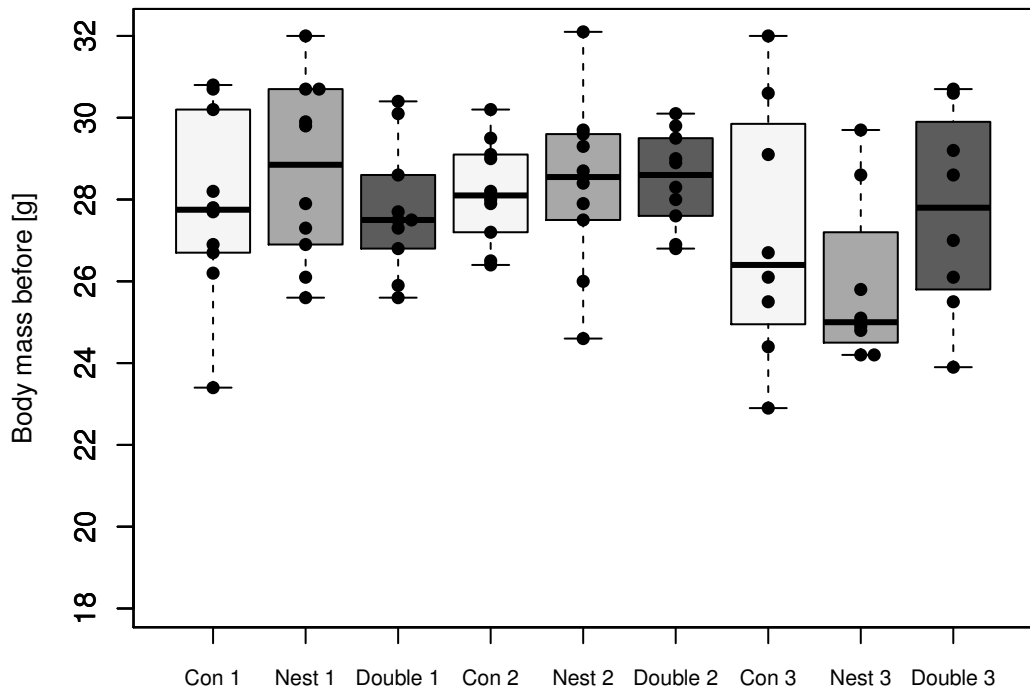**D2 male**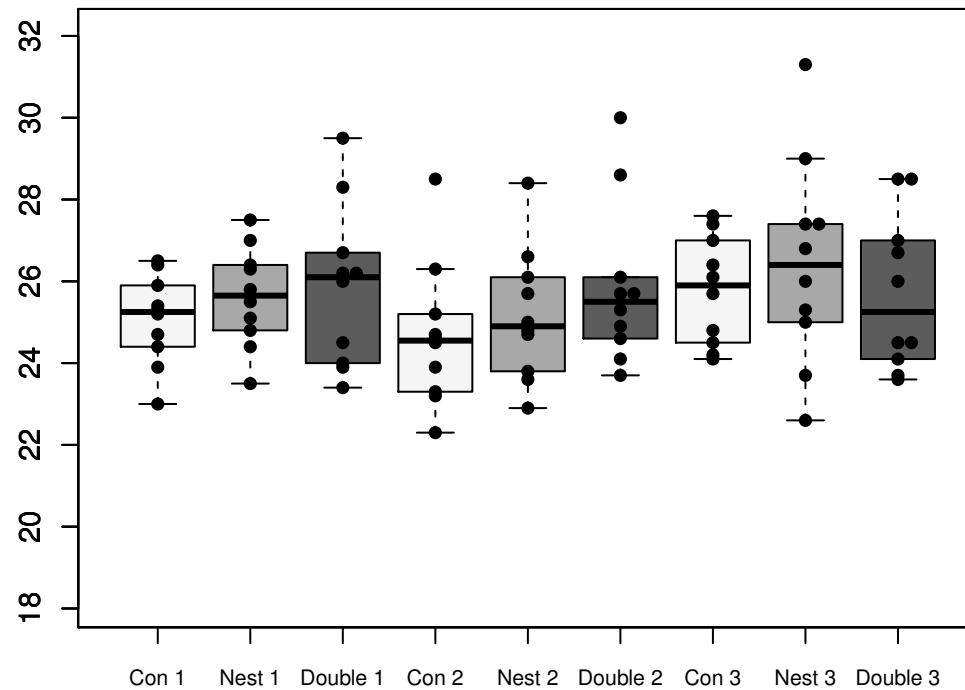

**B6 female**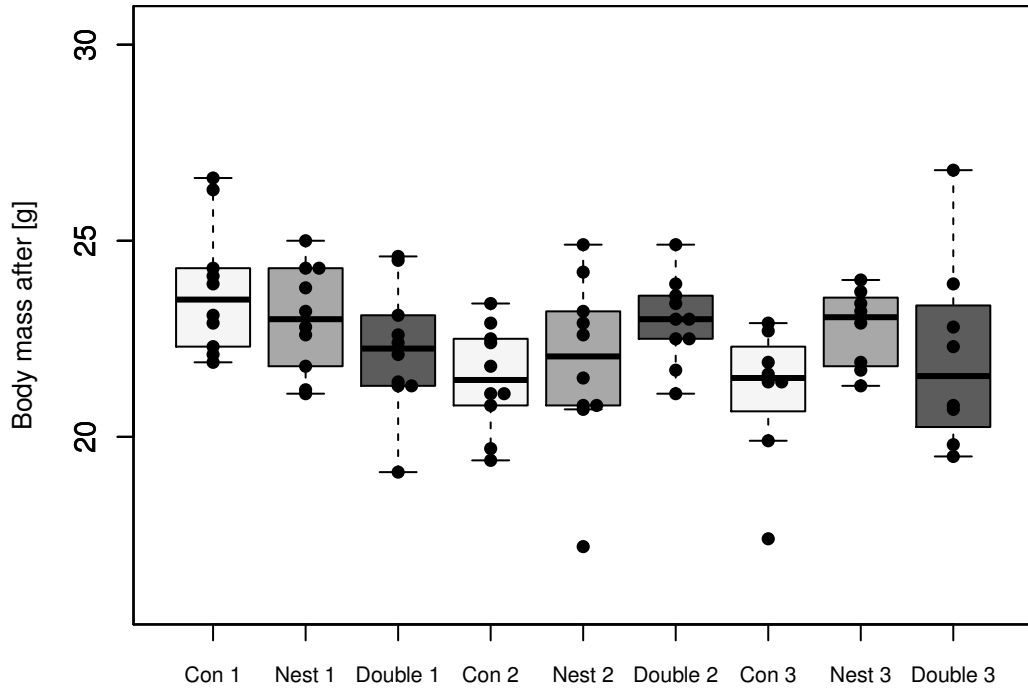**D2 female**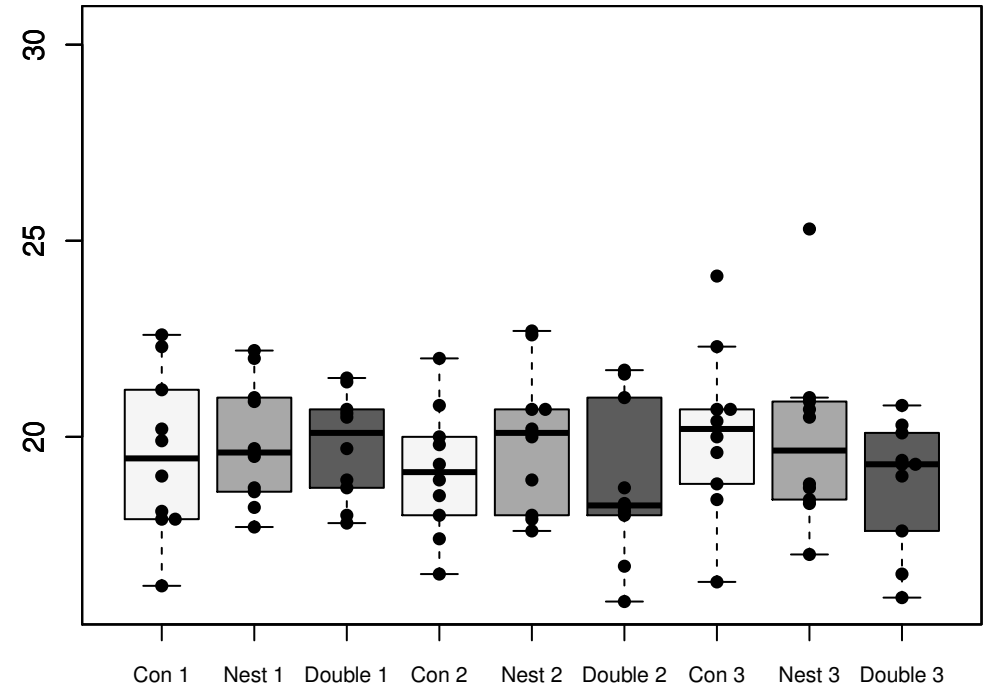**B6 male**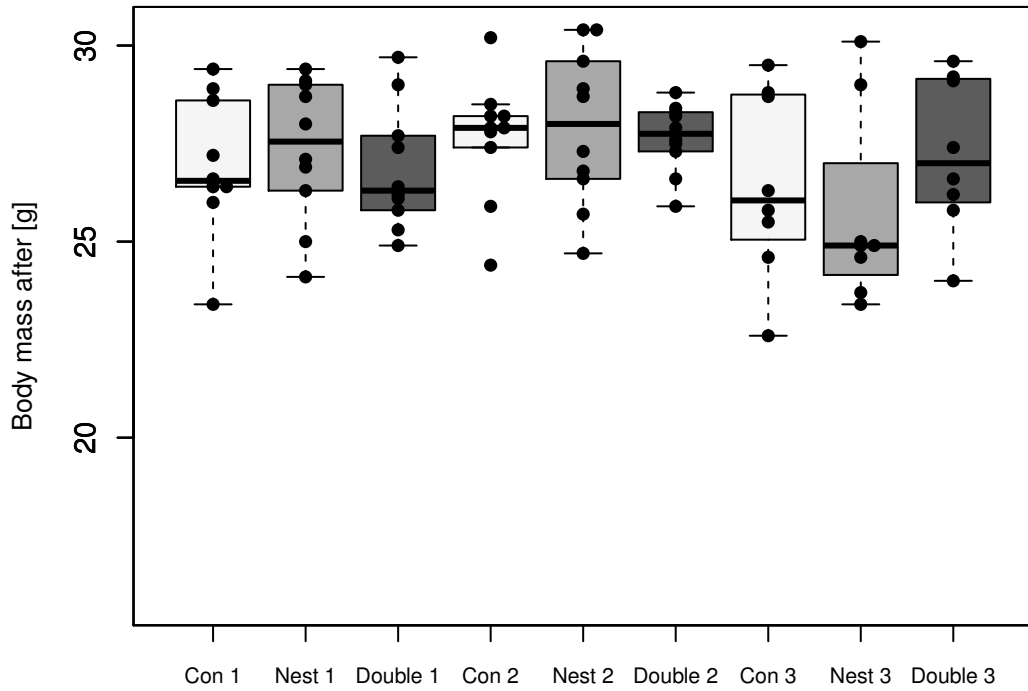**D2 male**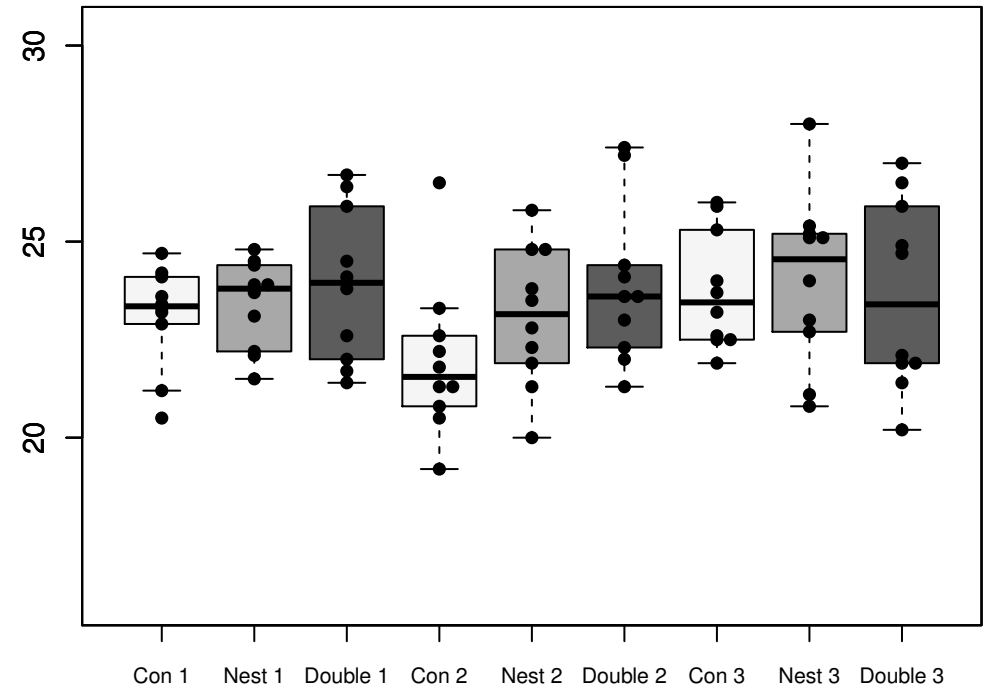

**B6 female**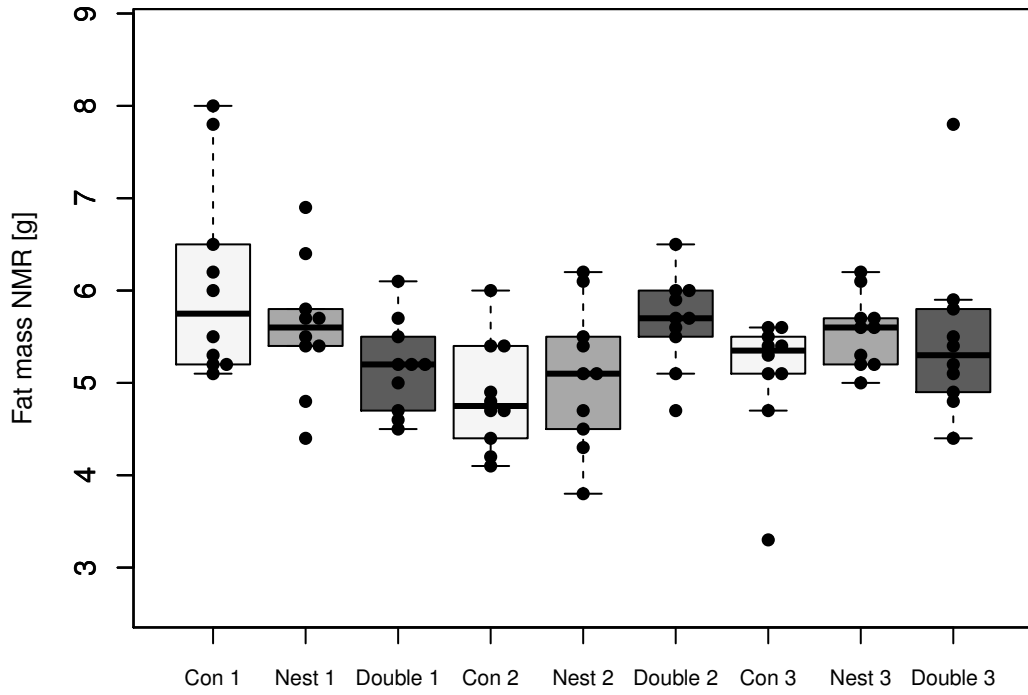**D2 female**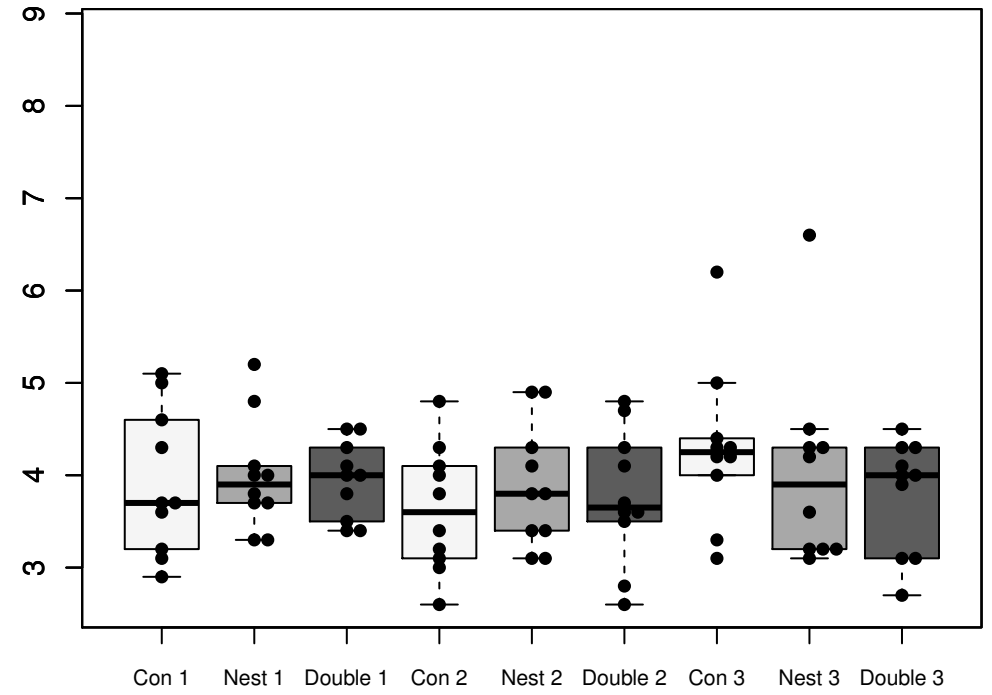**B6 male**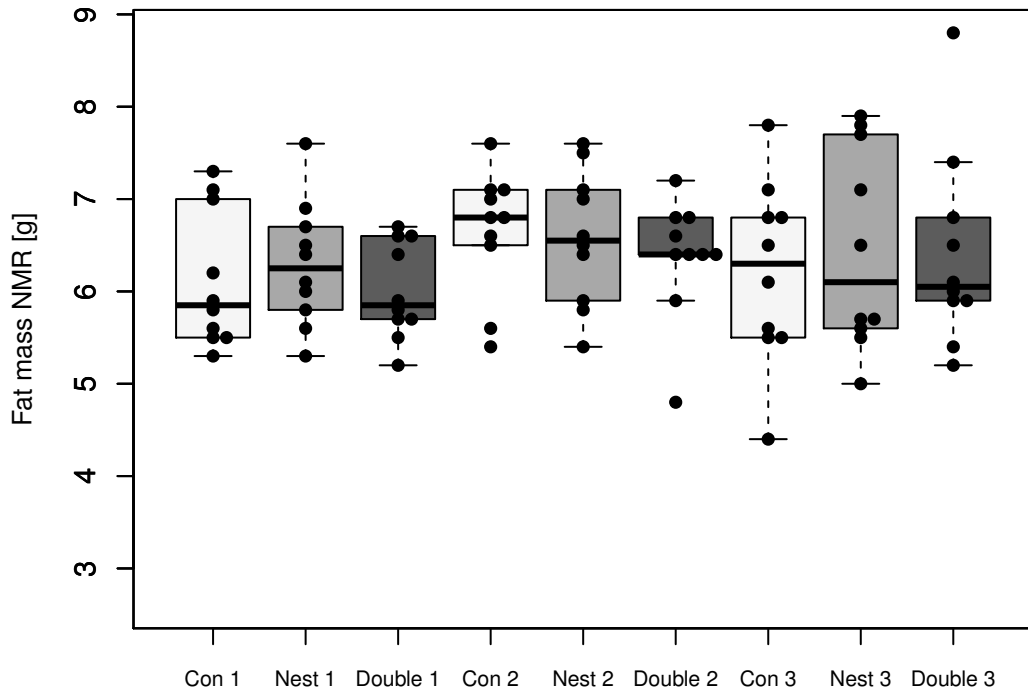**D2 male**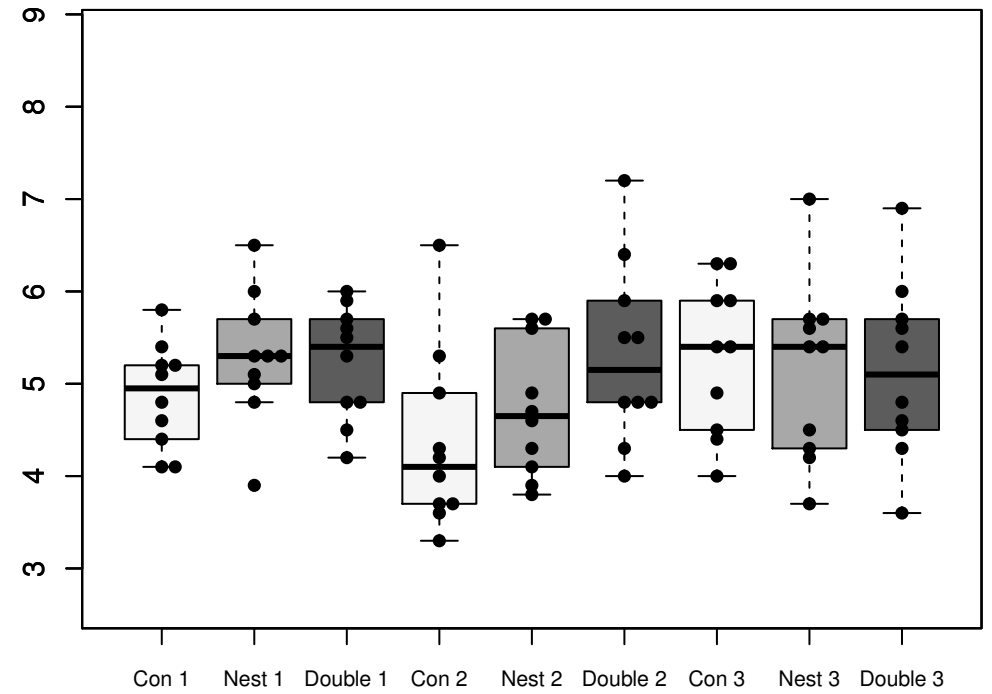

**B6 female**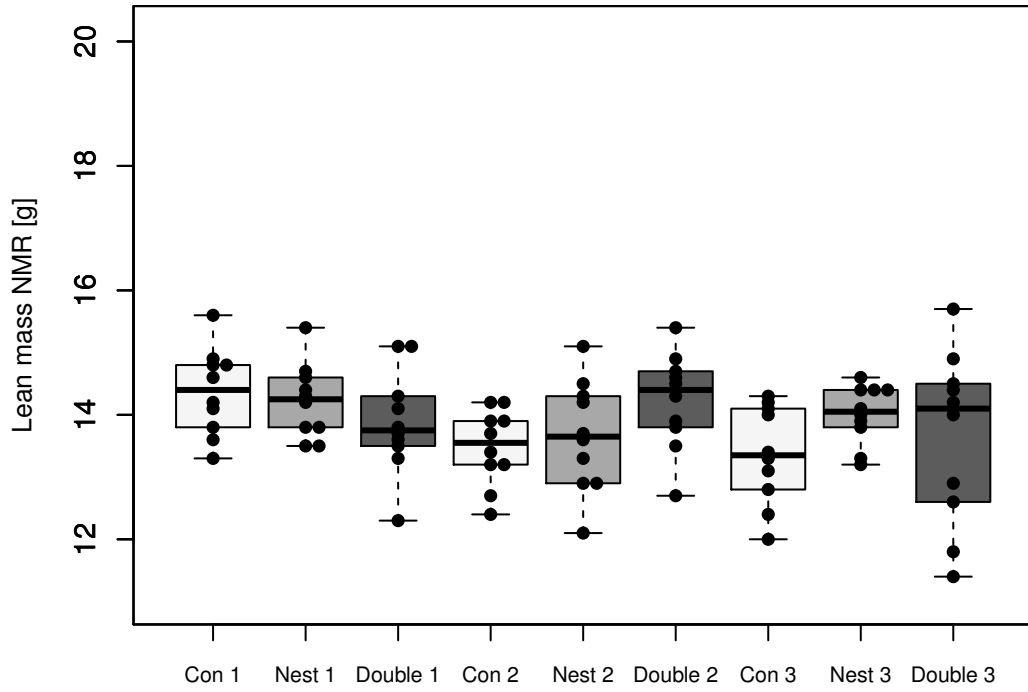**D2 female**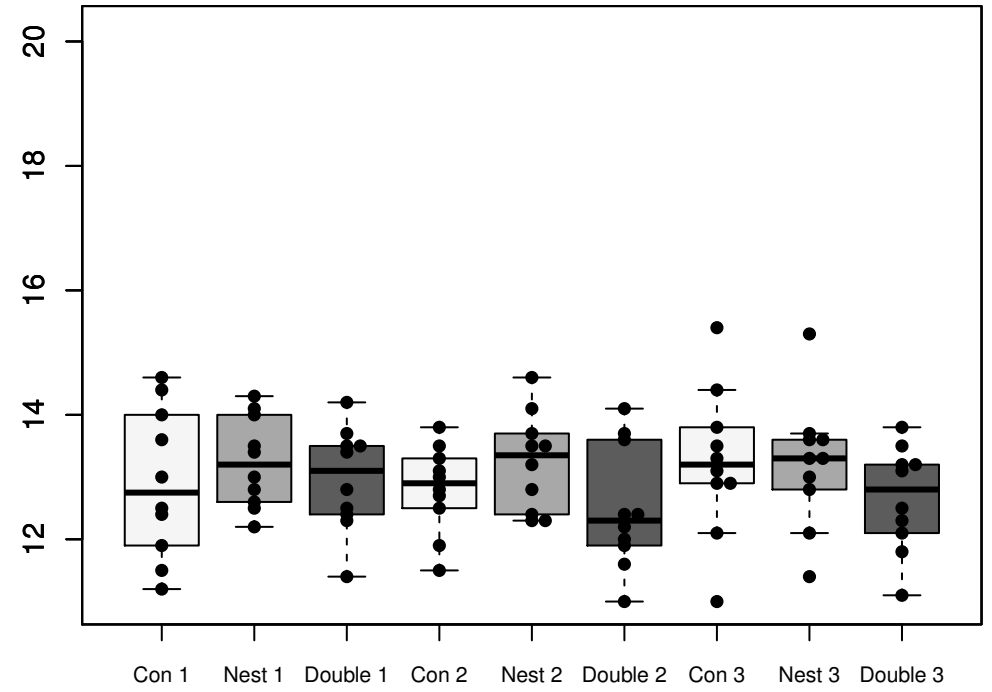**B6 male**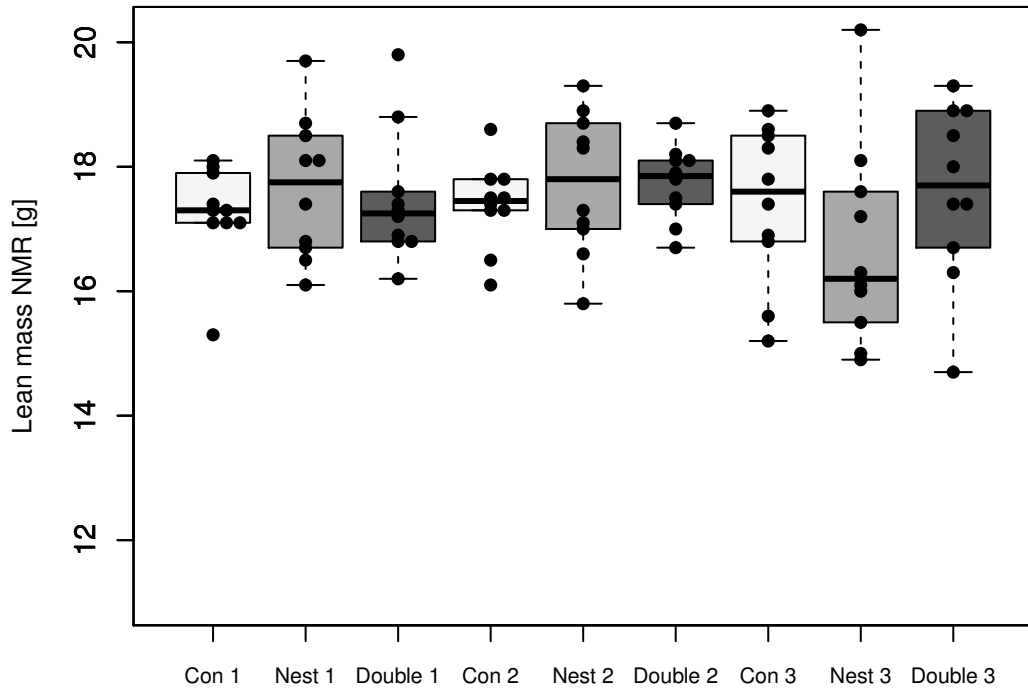**D2 male**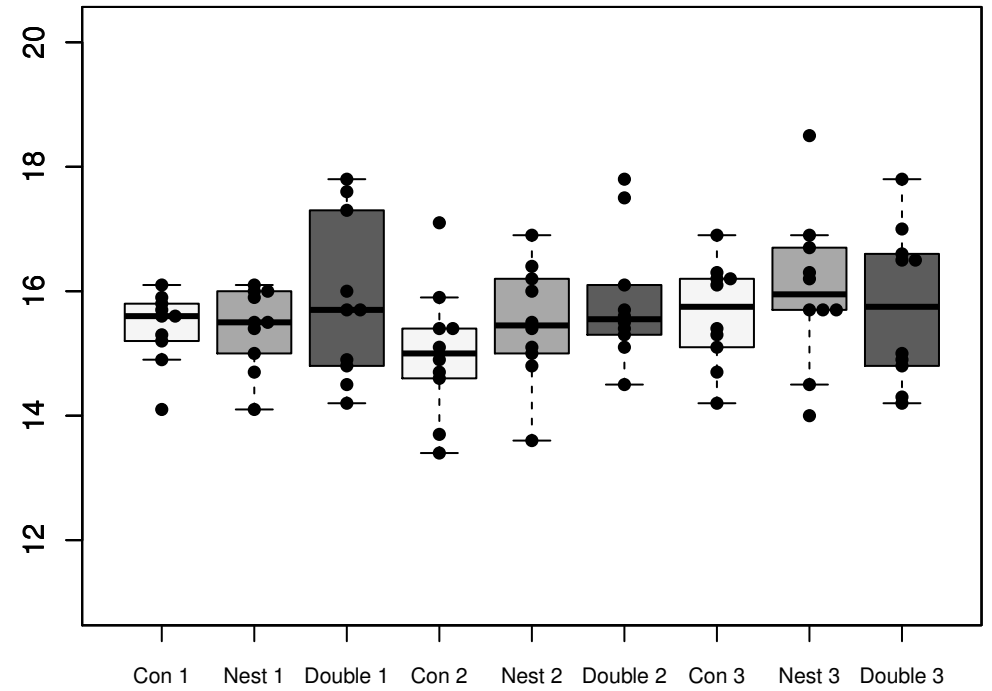

**B6 female**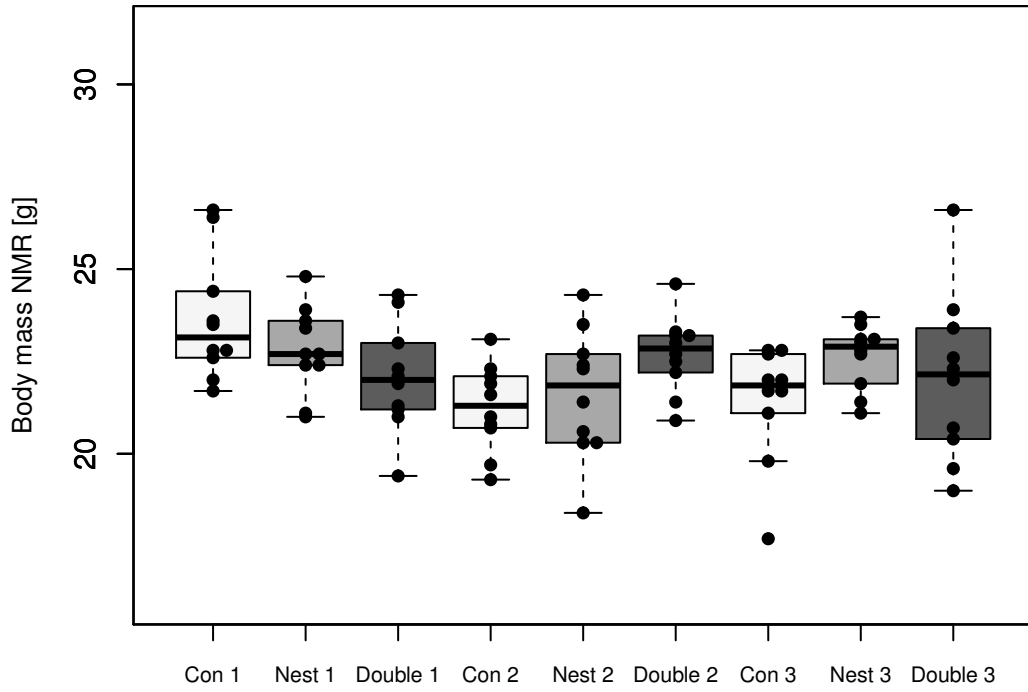**D2 female**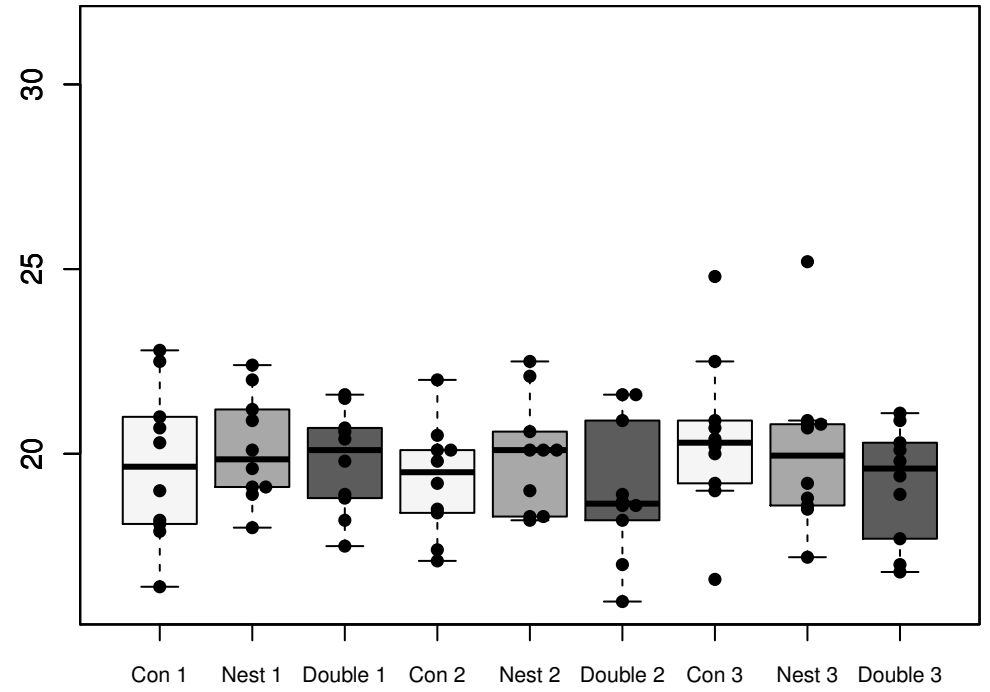**B6 male**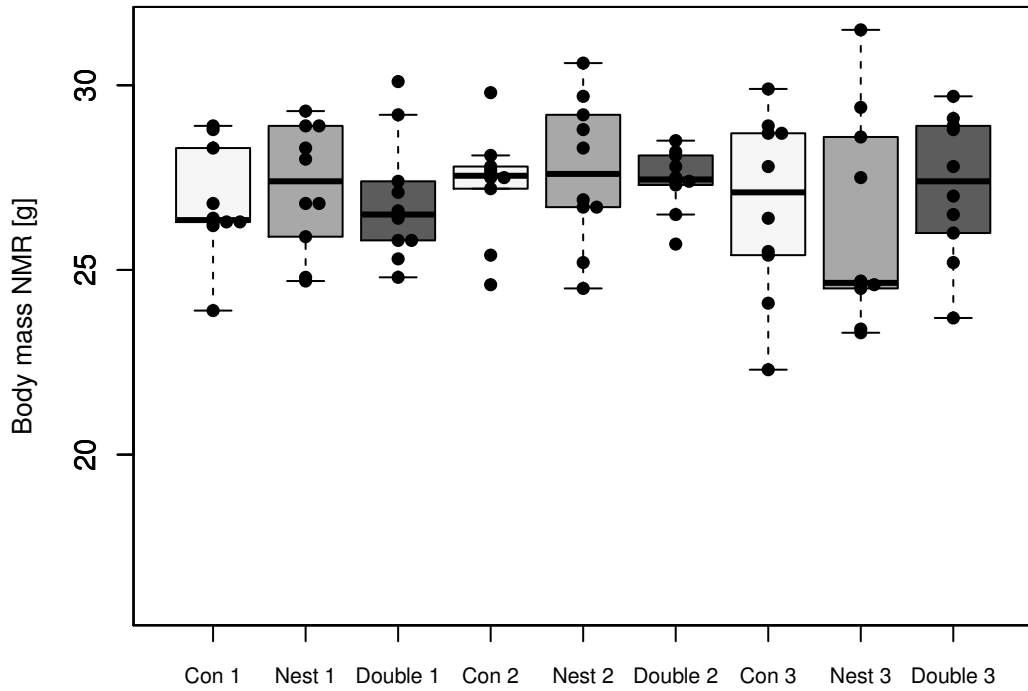**D2 male**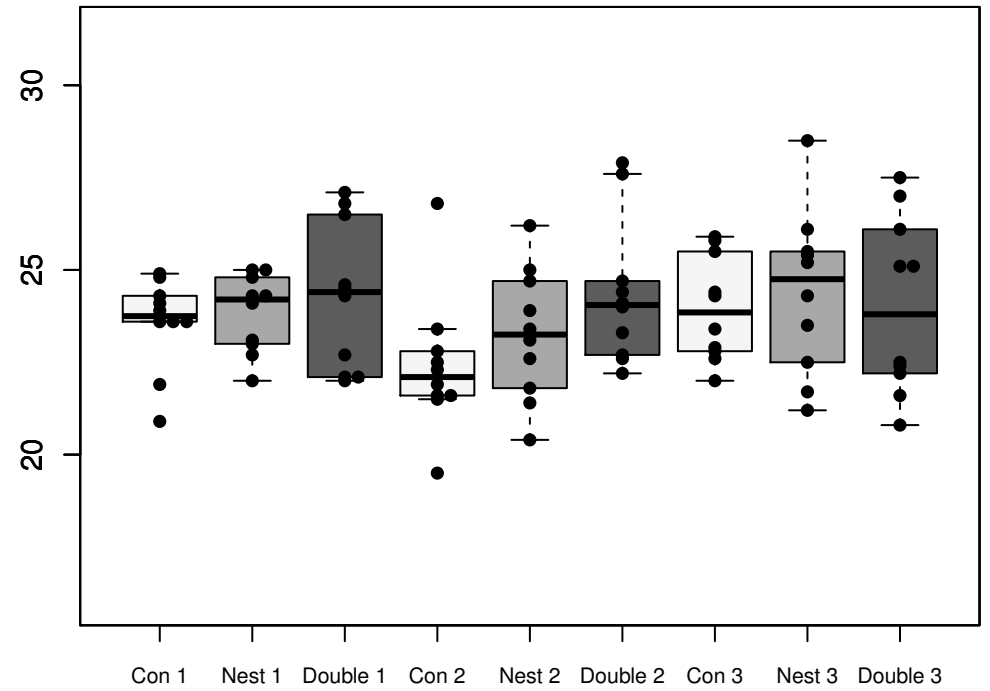

**B6 female**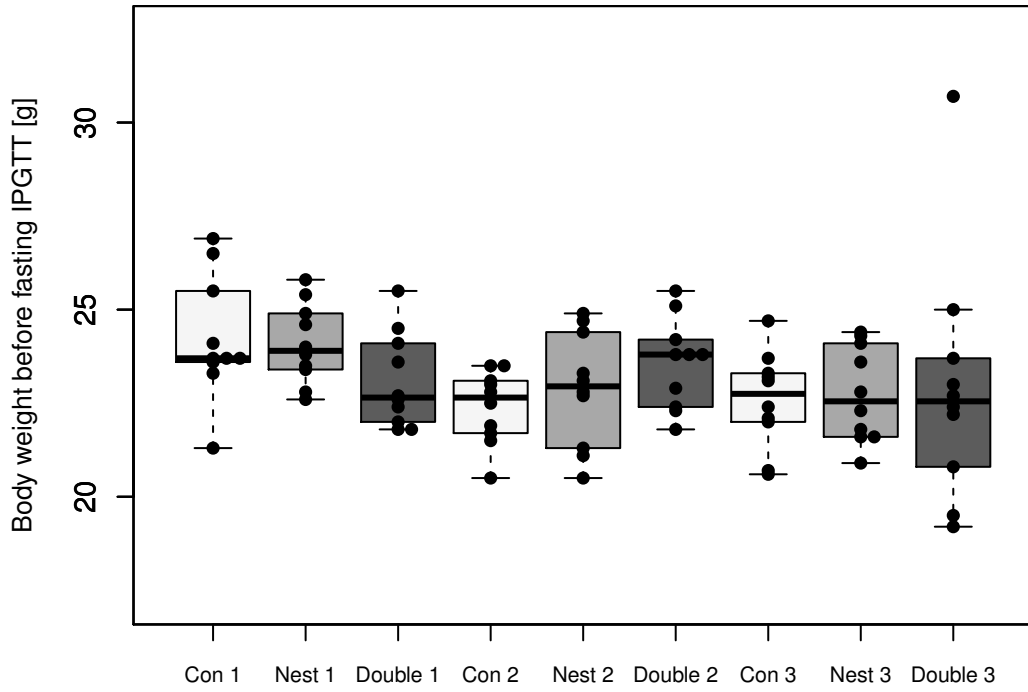**D2 female**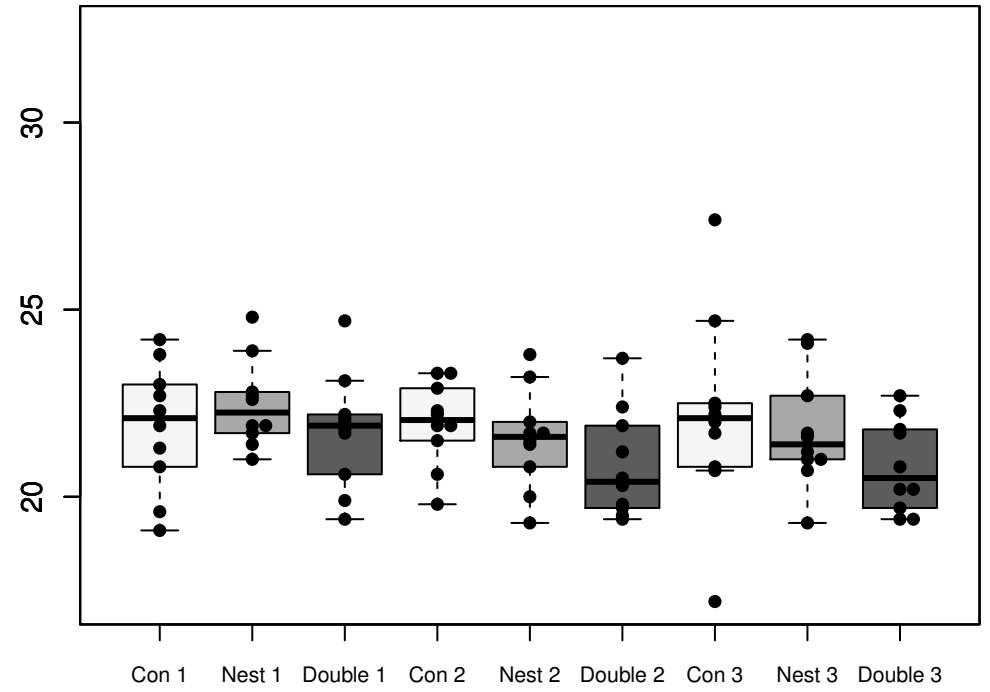**B6 male**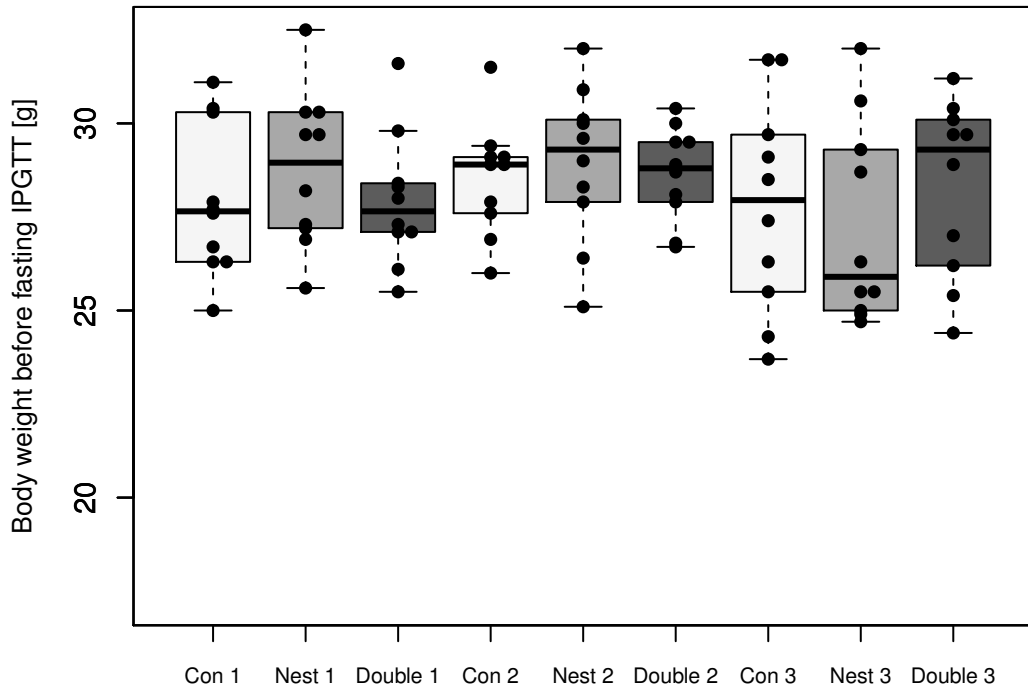**D2 male**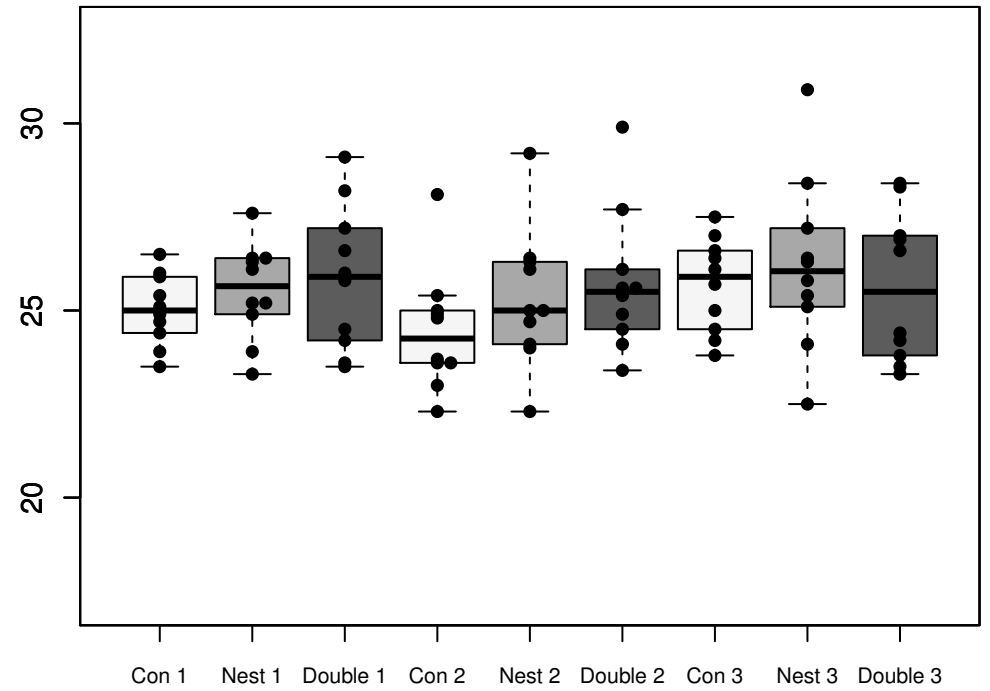

**B6 female**

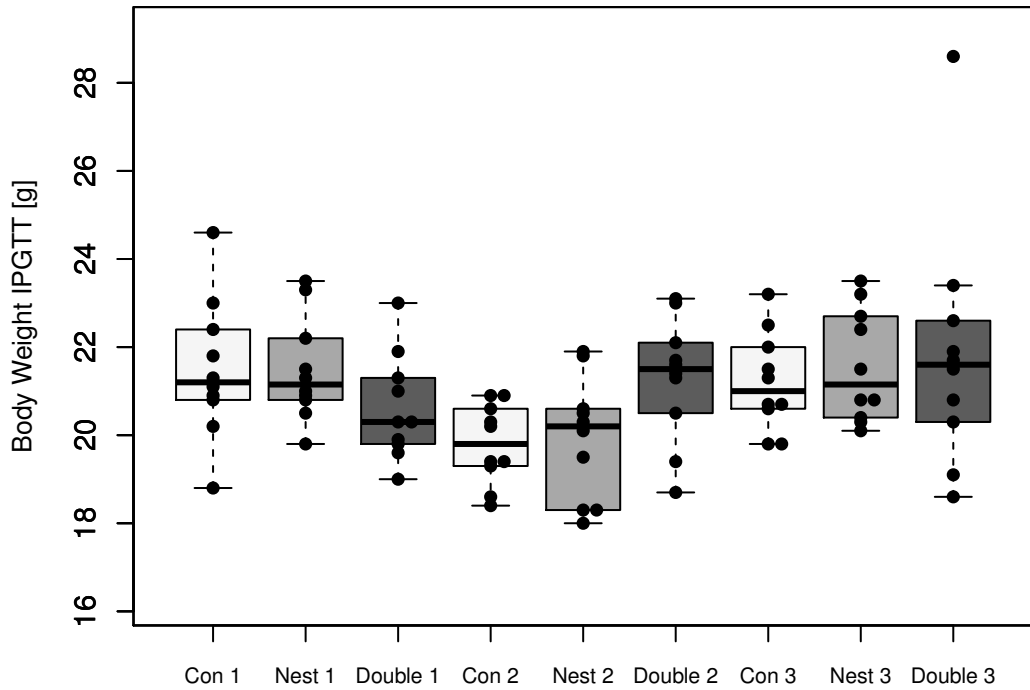

**D2 female**

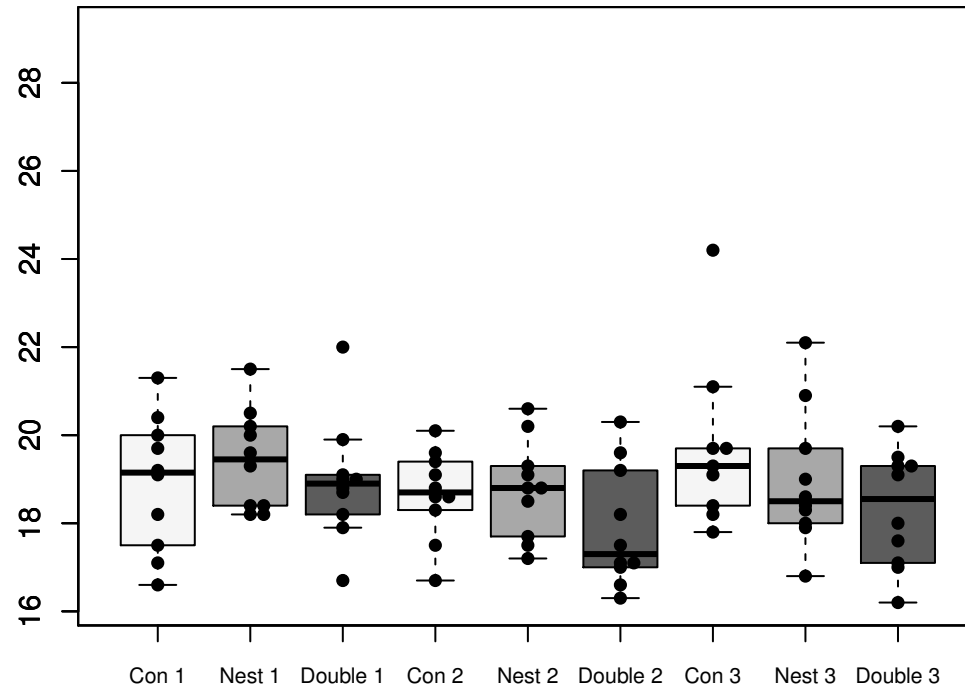

**B6 male**

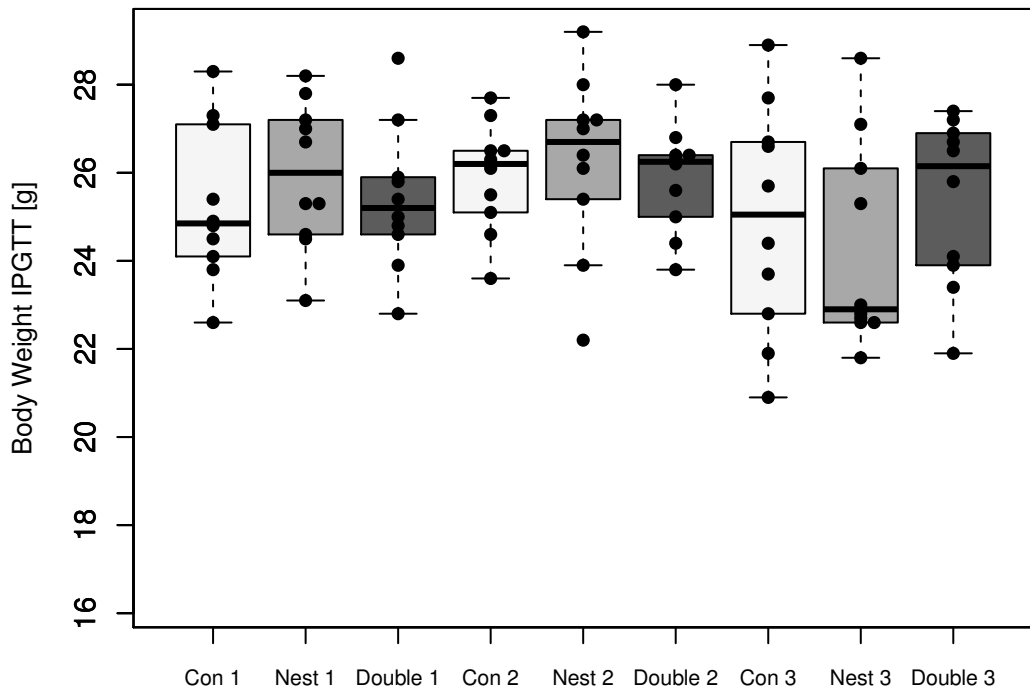

**D2 male**

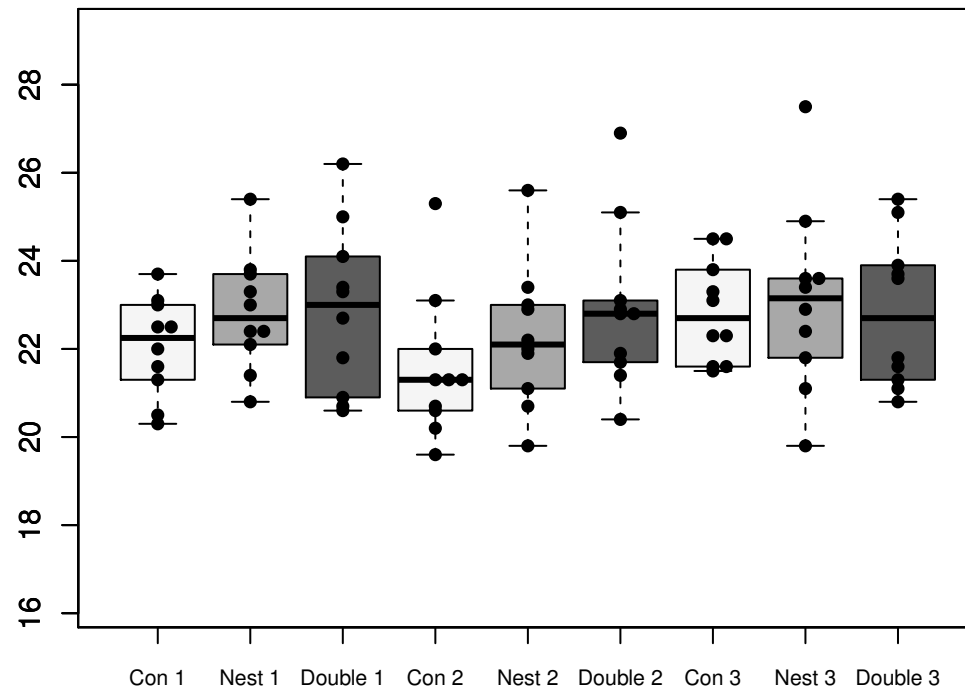



**D2 female**

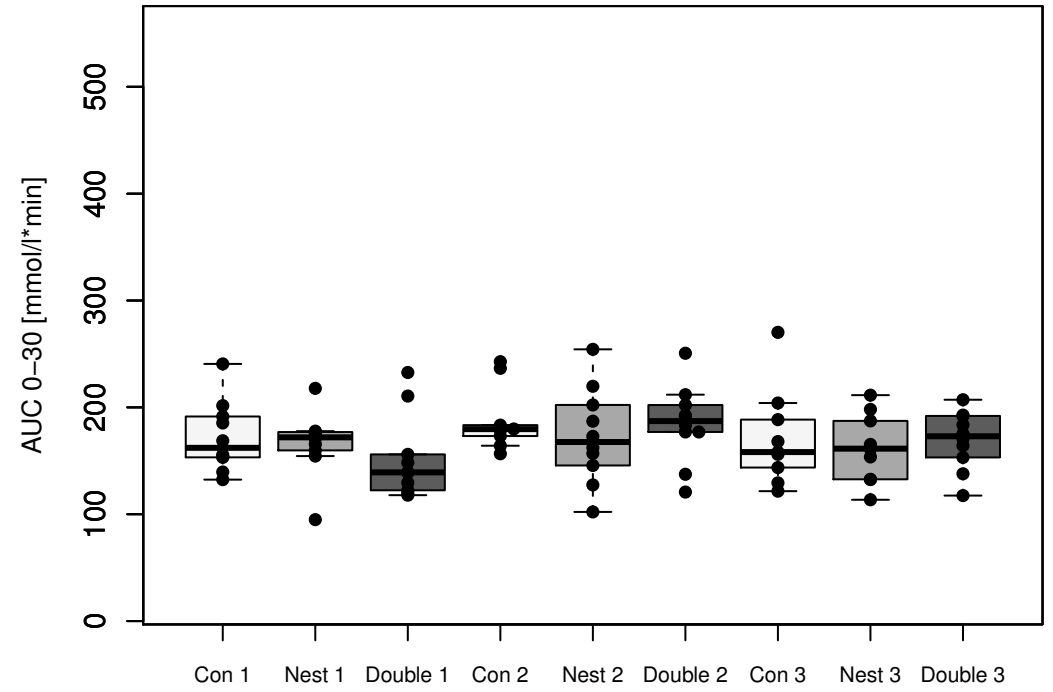

**D2 male**

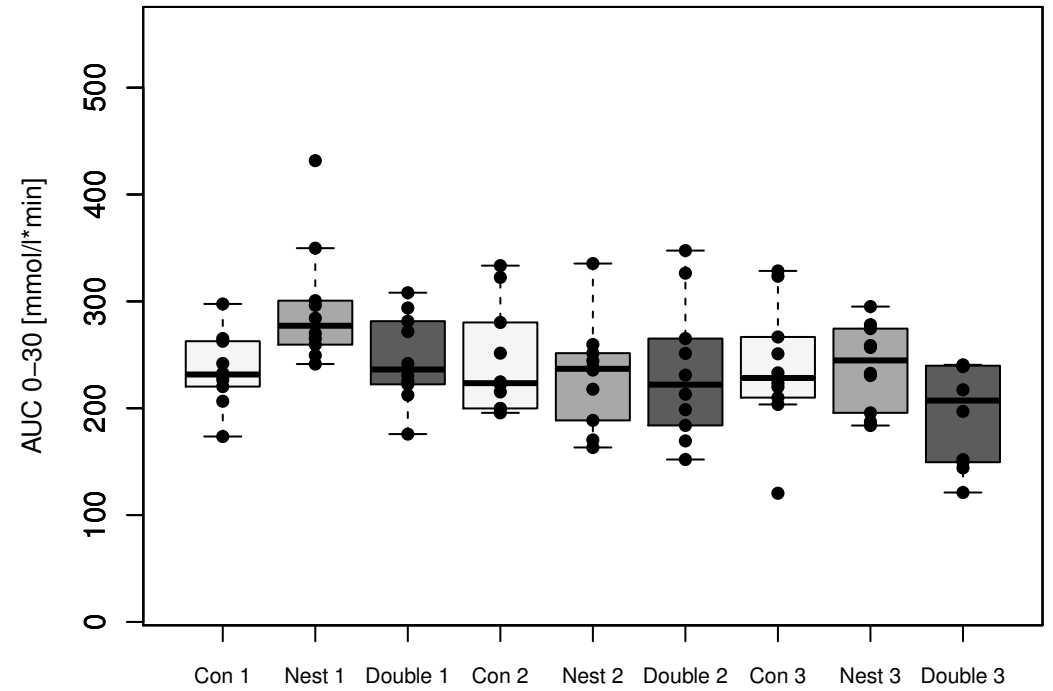

### D2 female

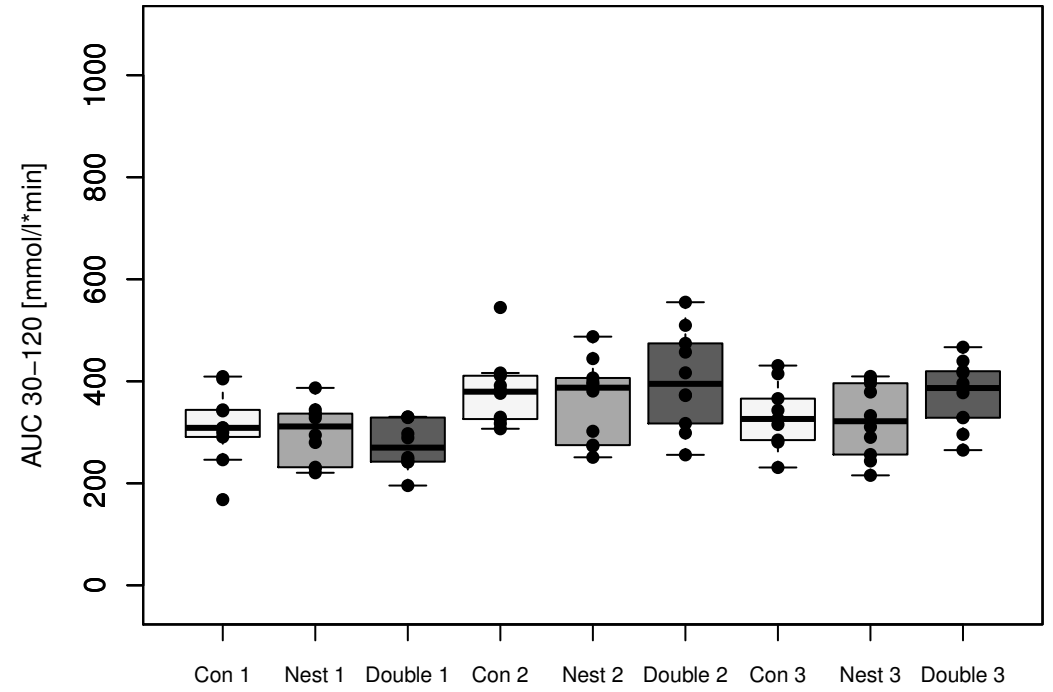

### D2 male

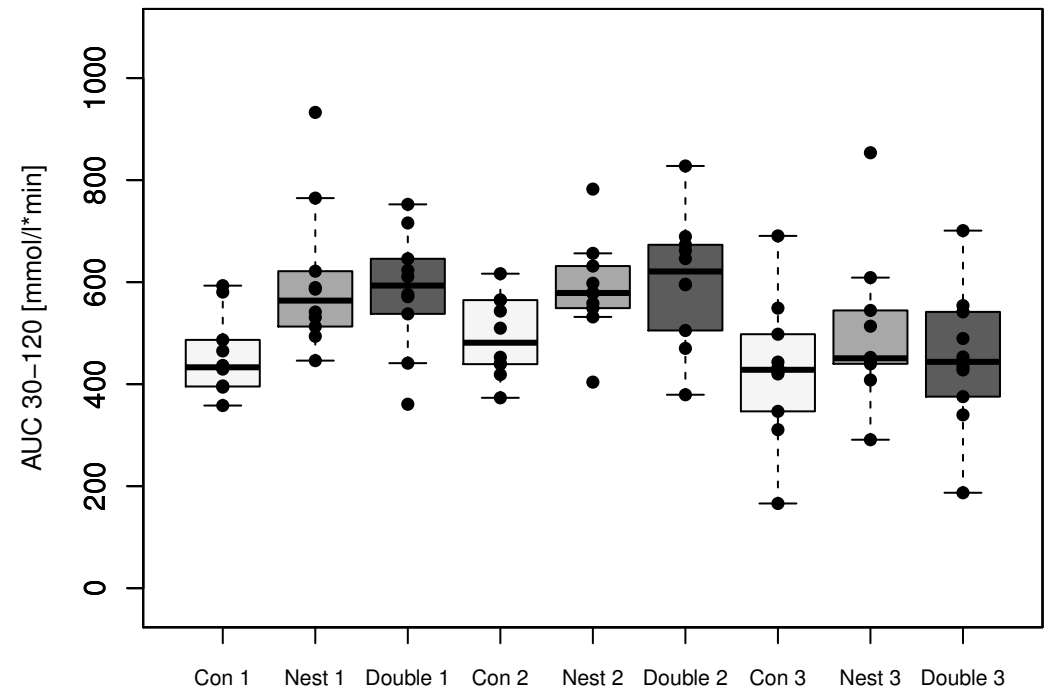

### D2 female

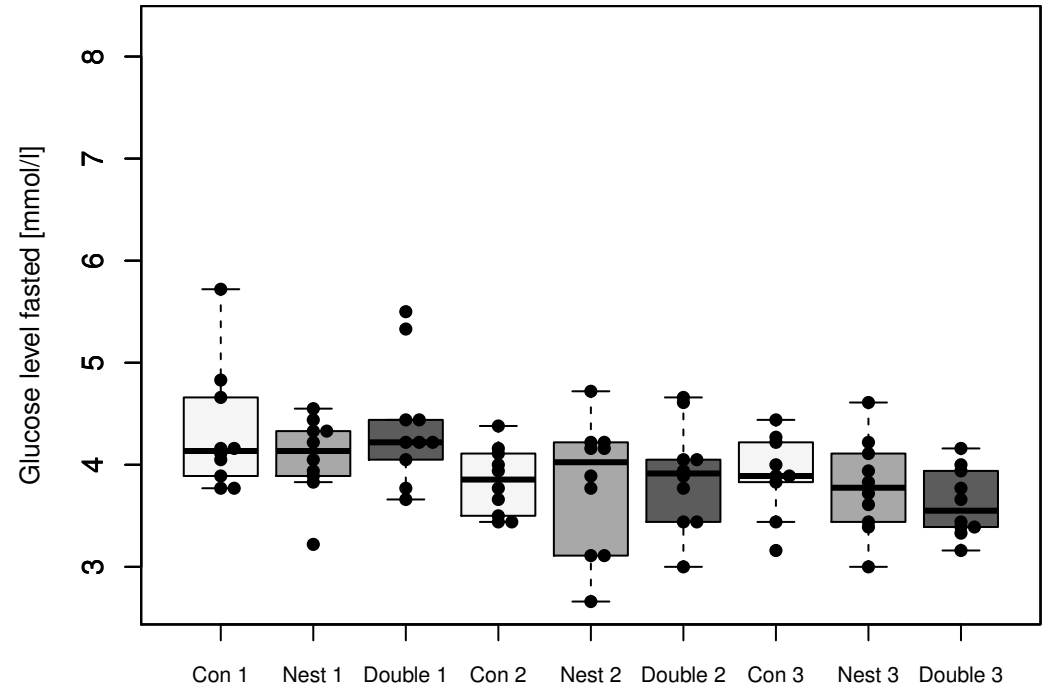

### D2 male

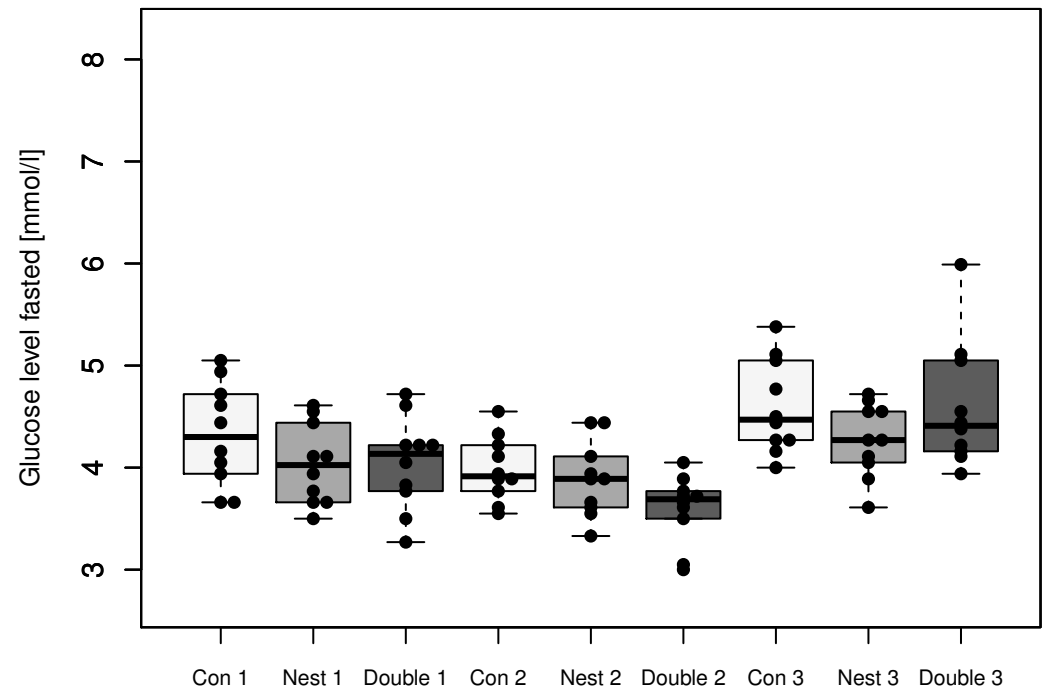

**B6 female**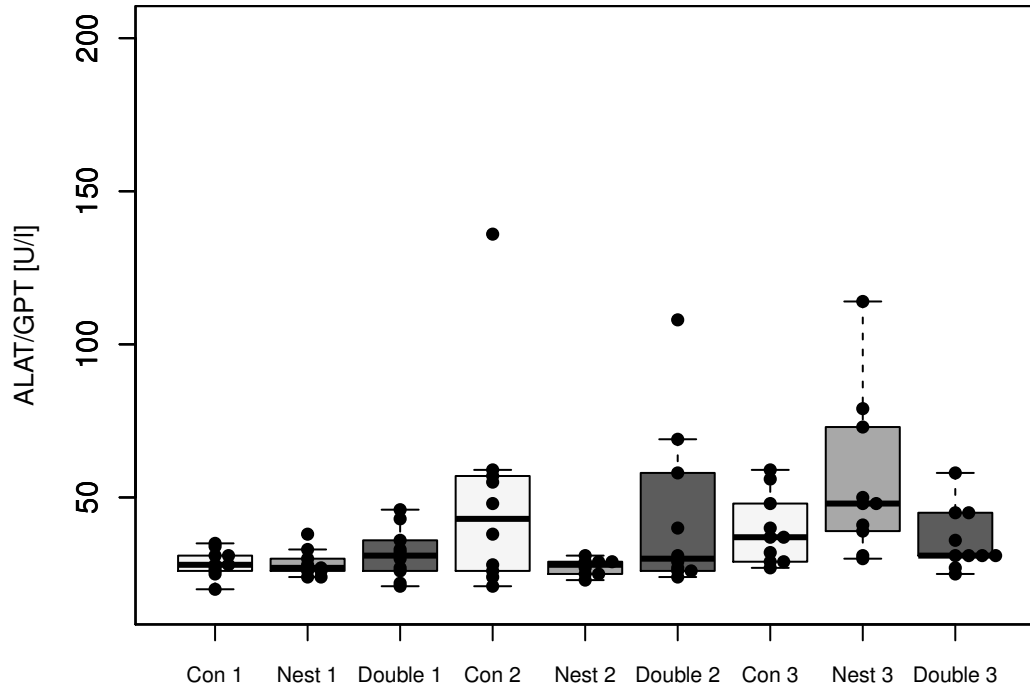**D2 female**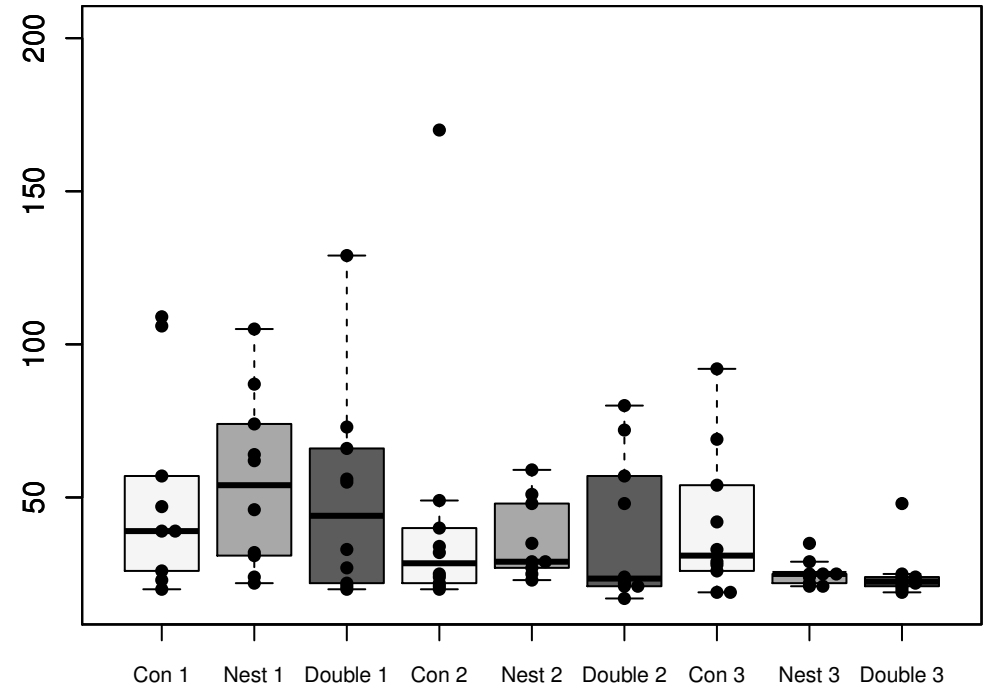**B6 male**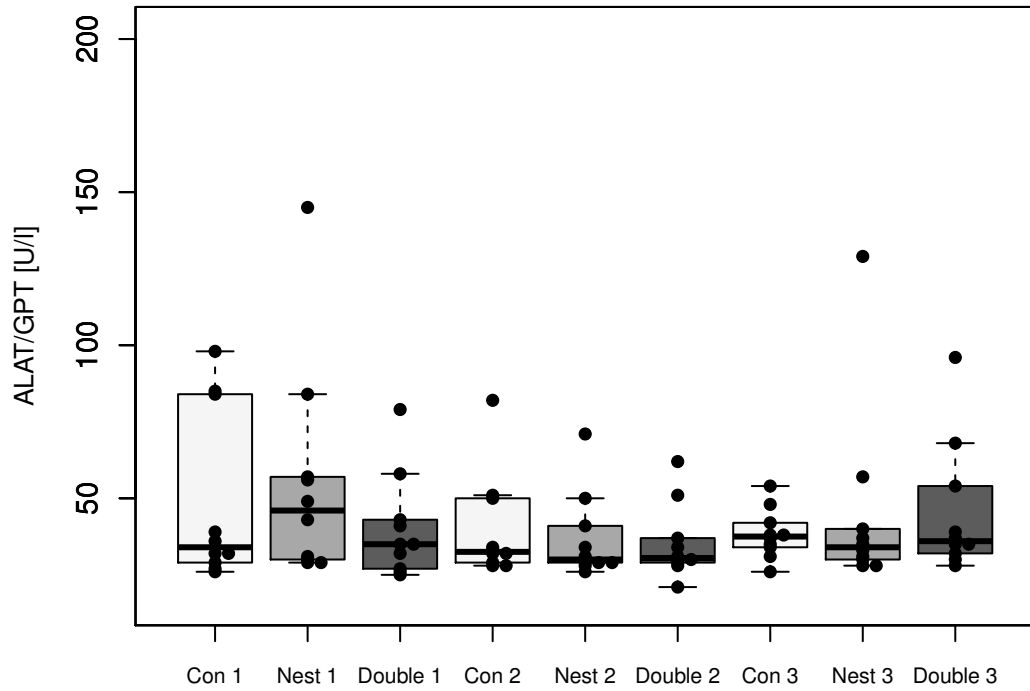**D2 male**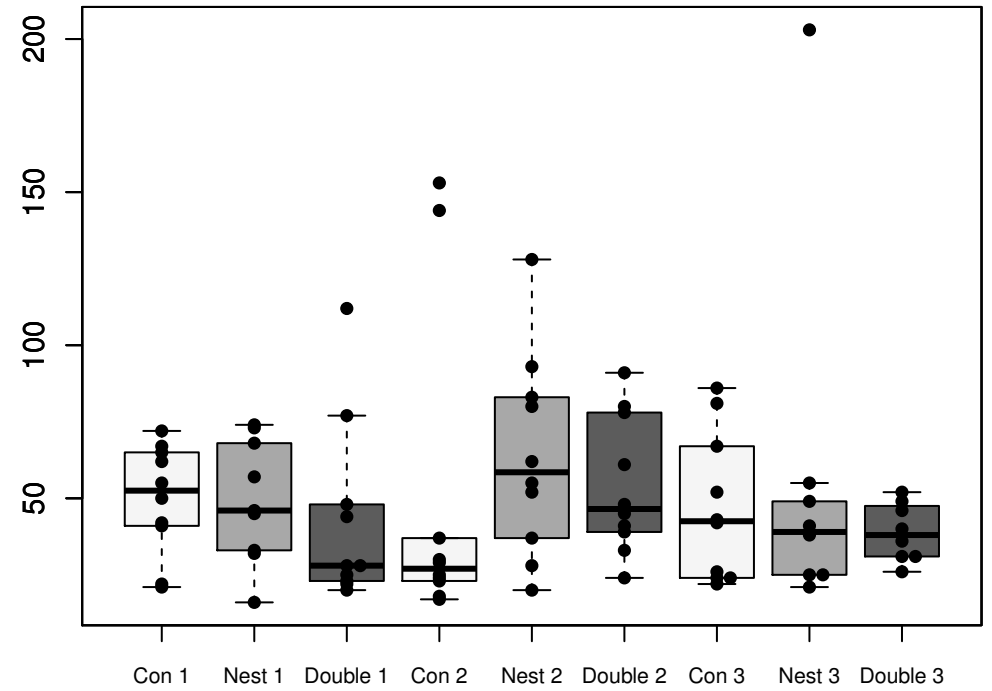

**B6 female**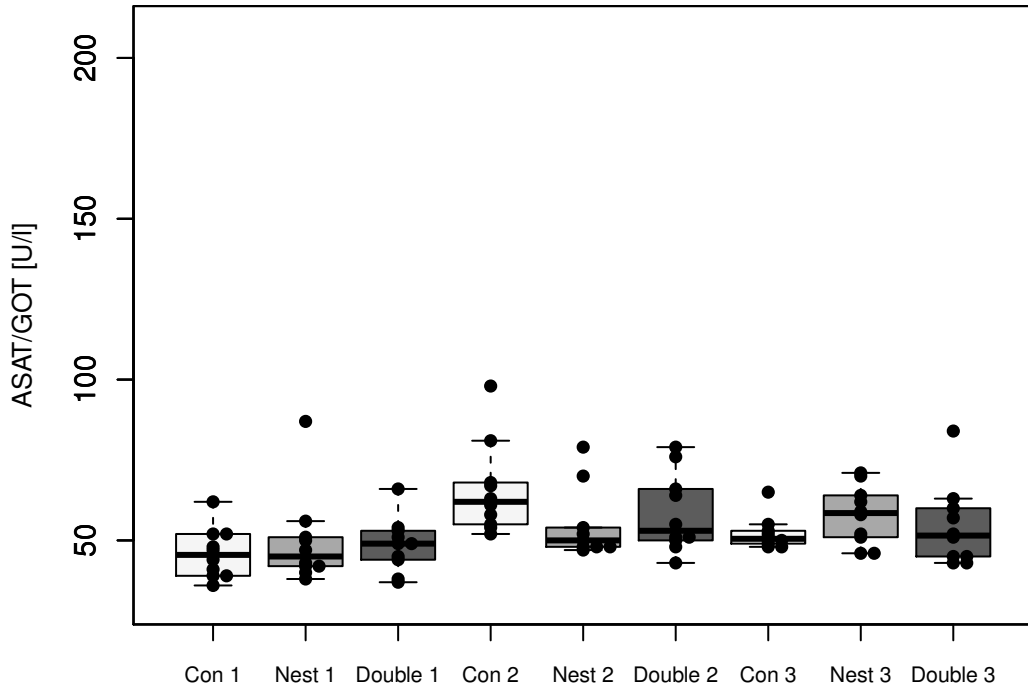**D2 female**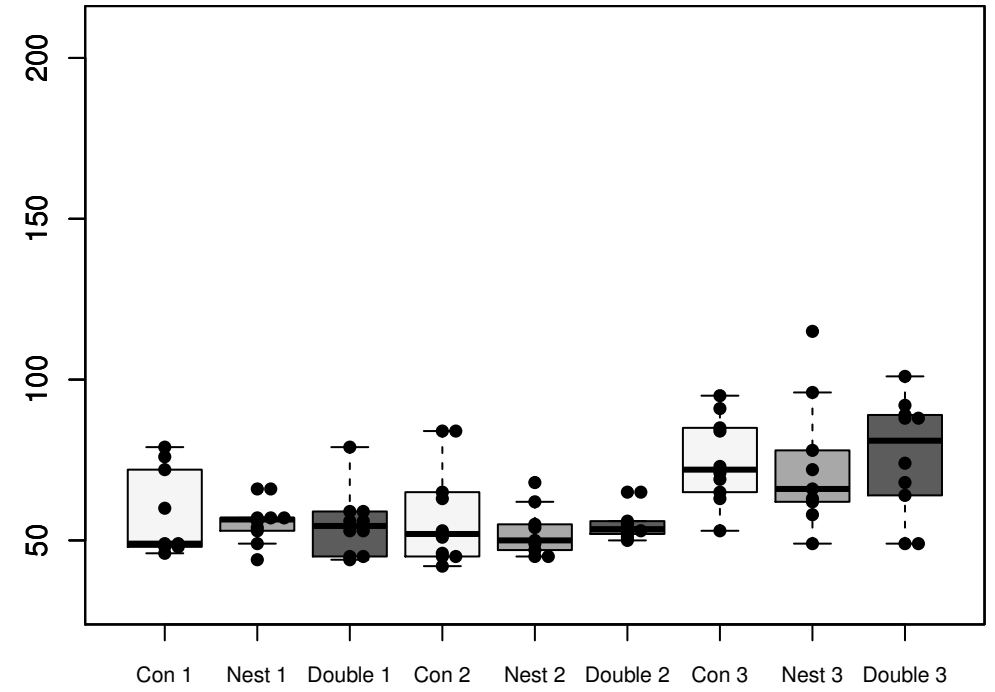**B6 male**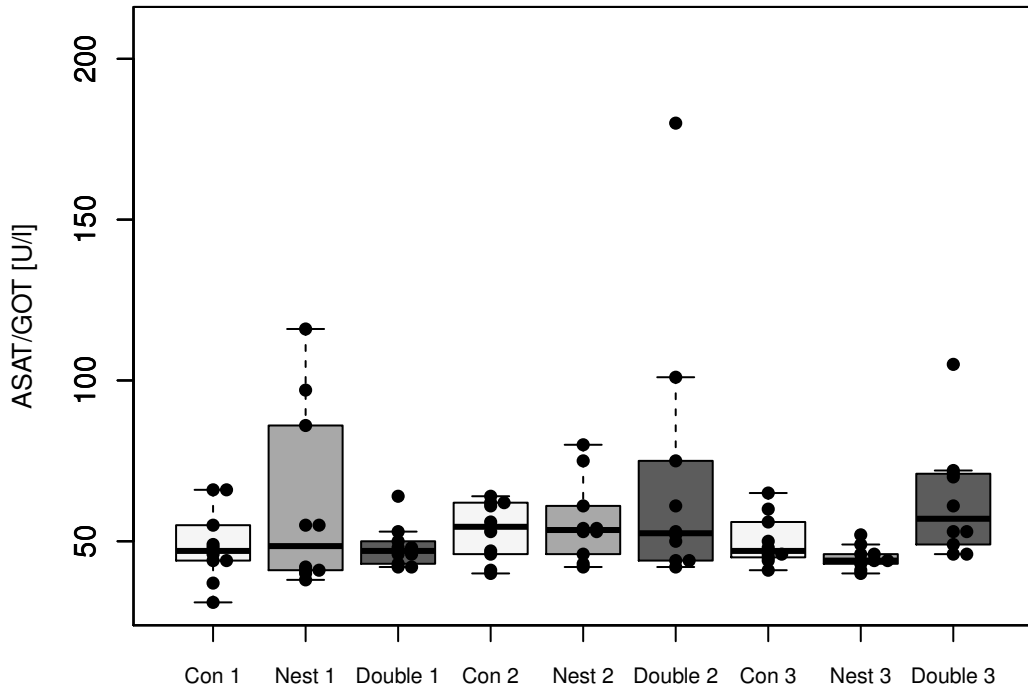**D2 male**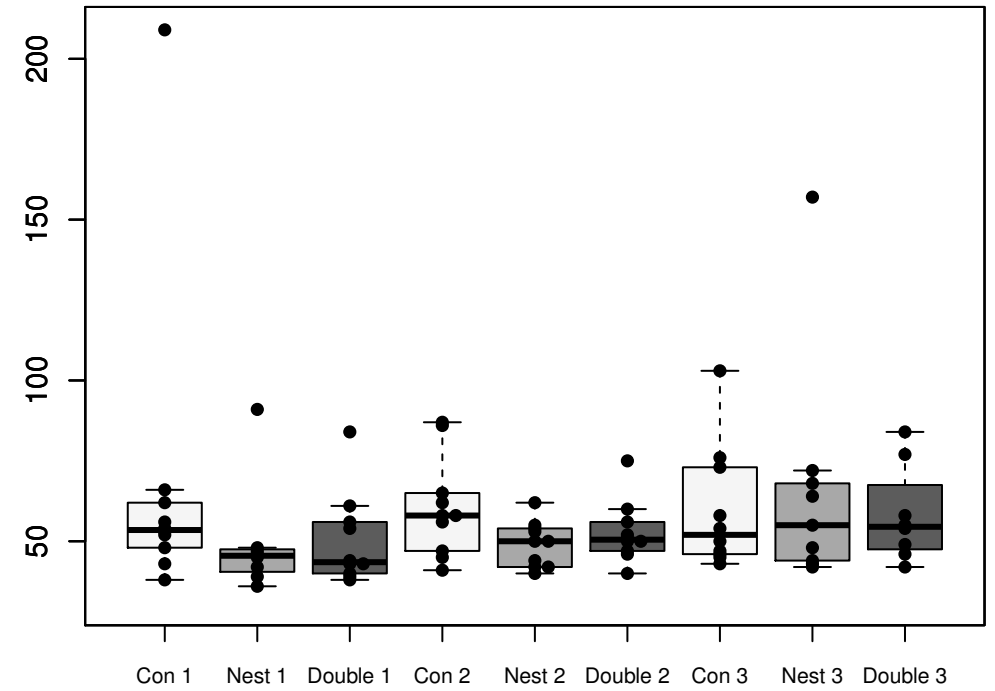

**B6 female**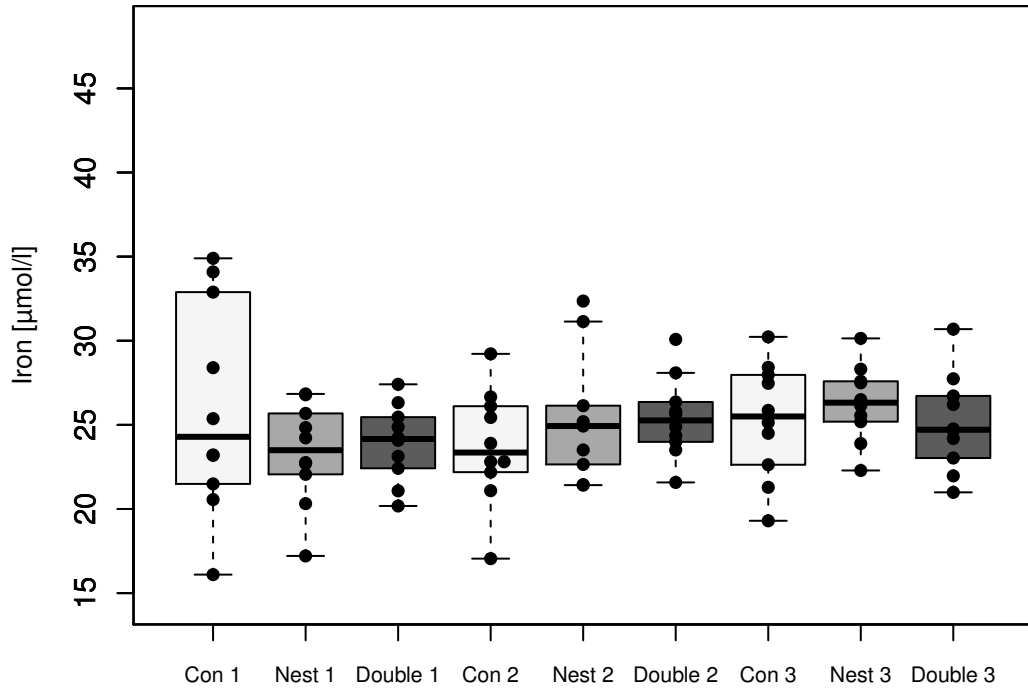**D2 female**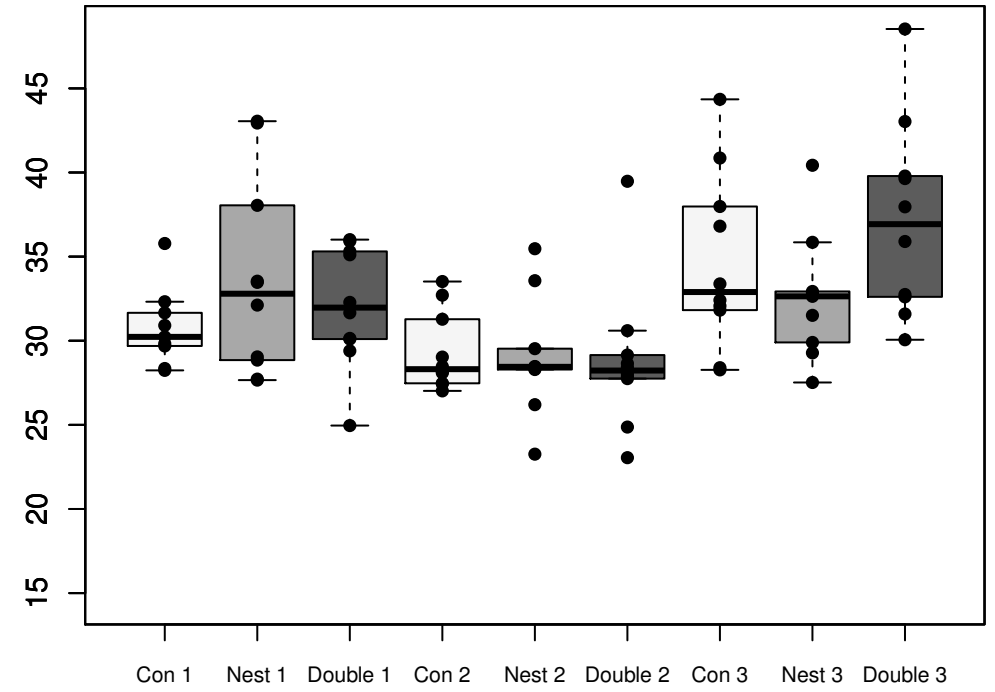**B6 male**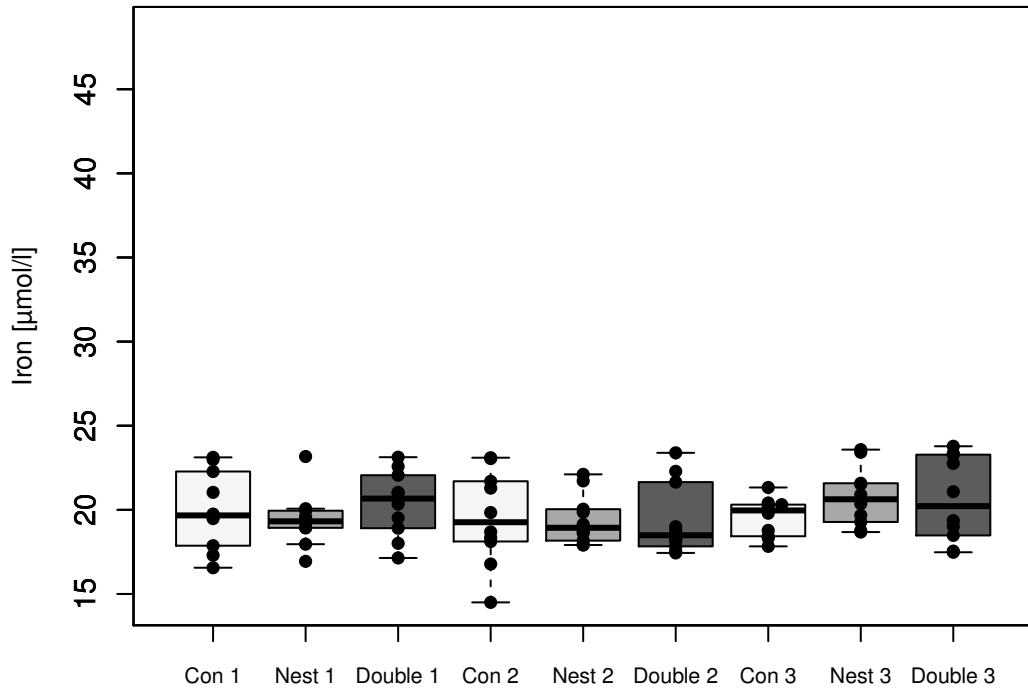**D2 male**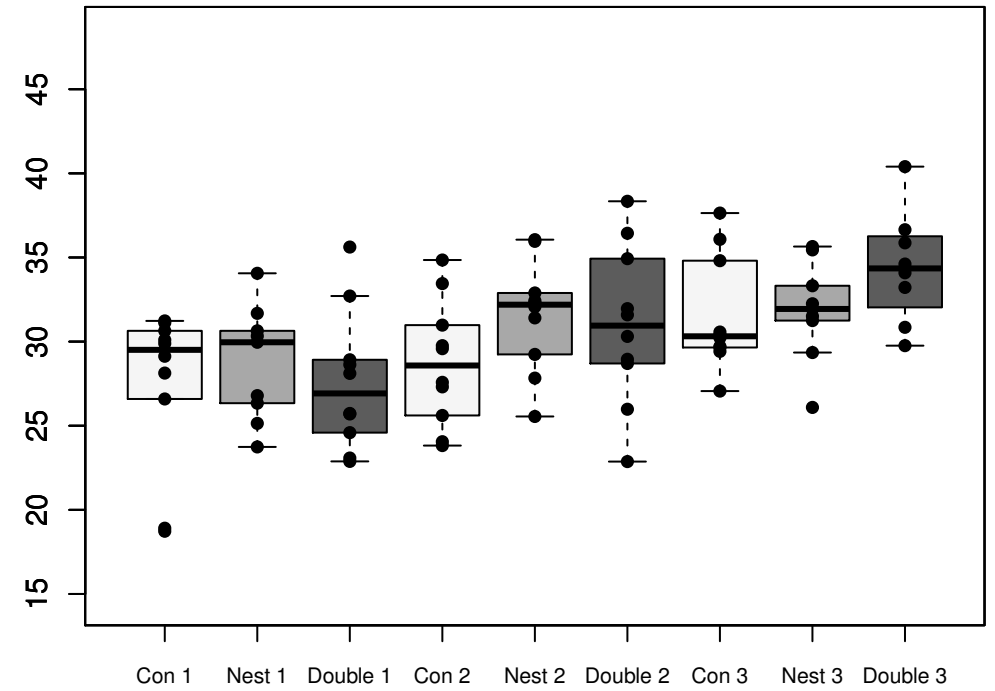

**B6 female**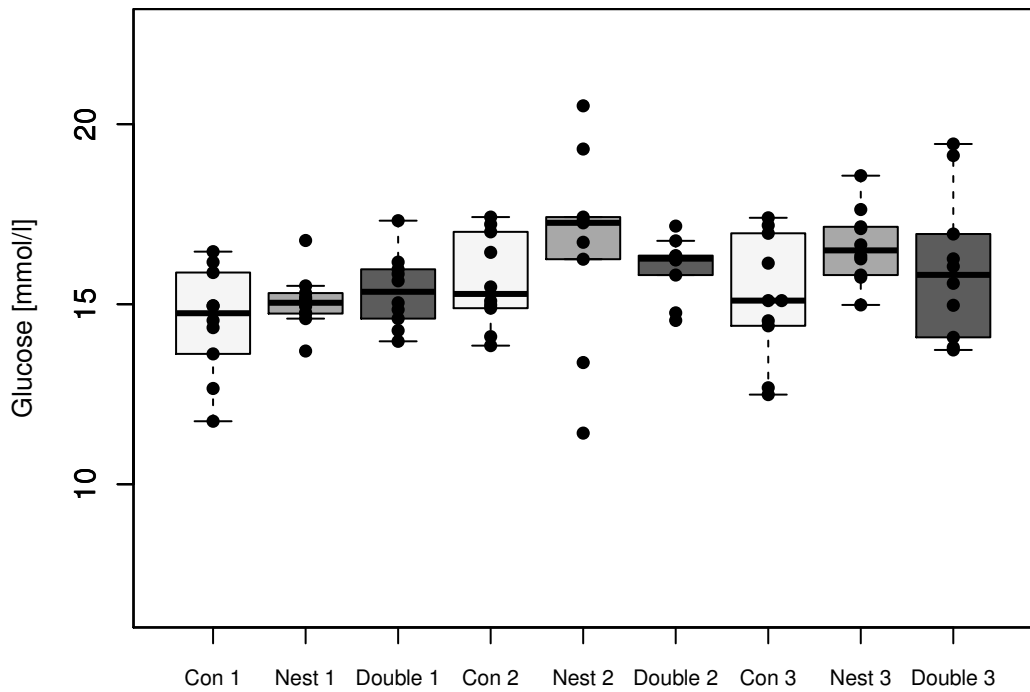**D2 female**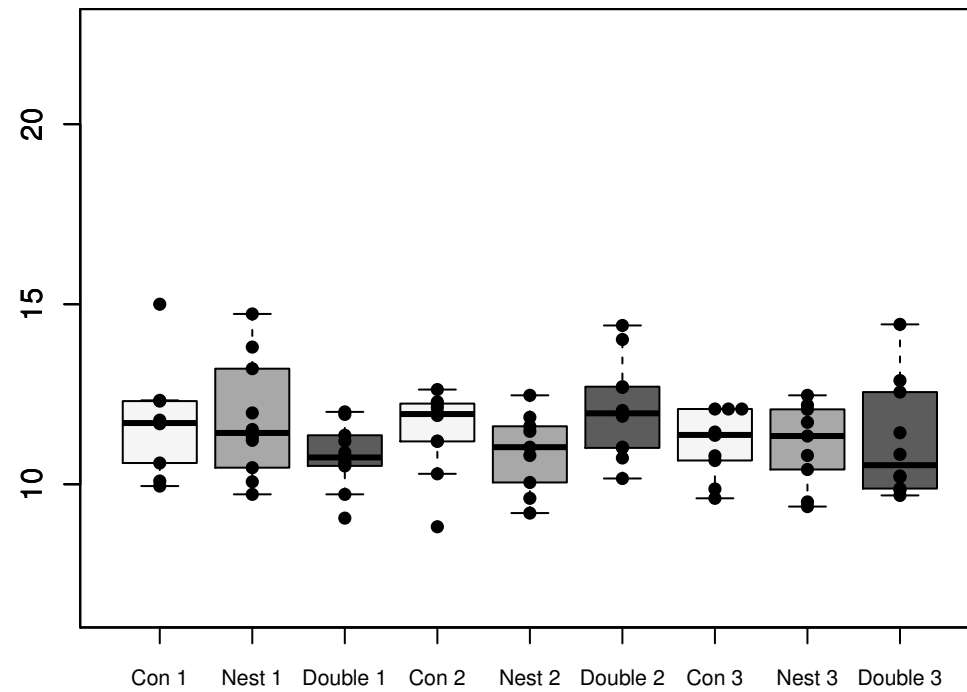**B6 male**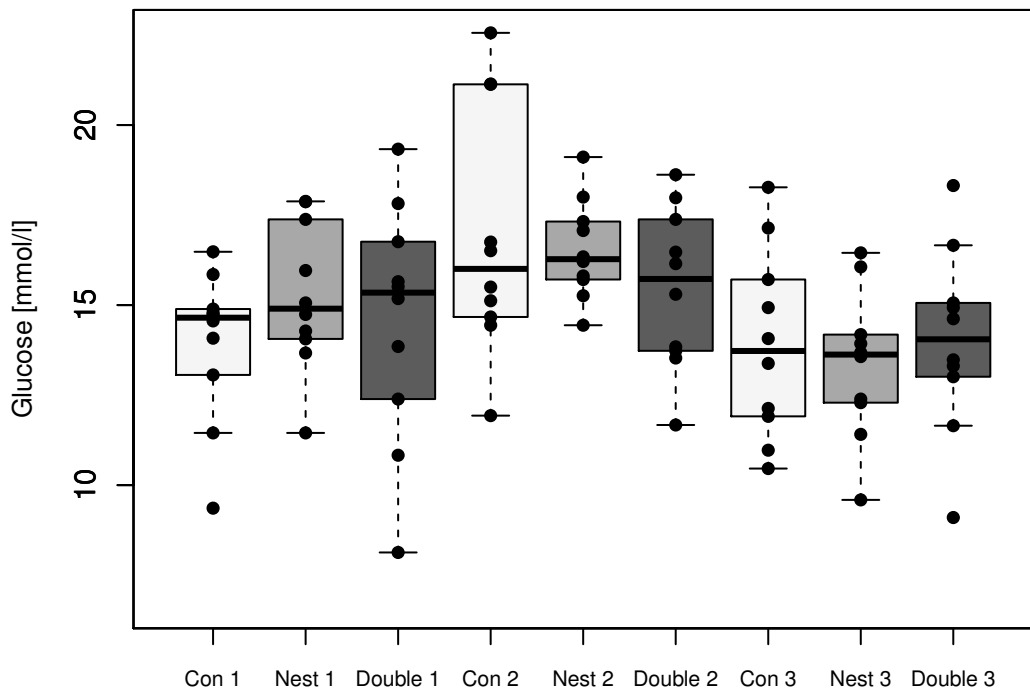**D2 male**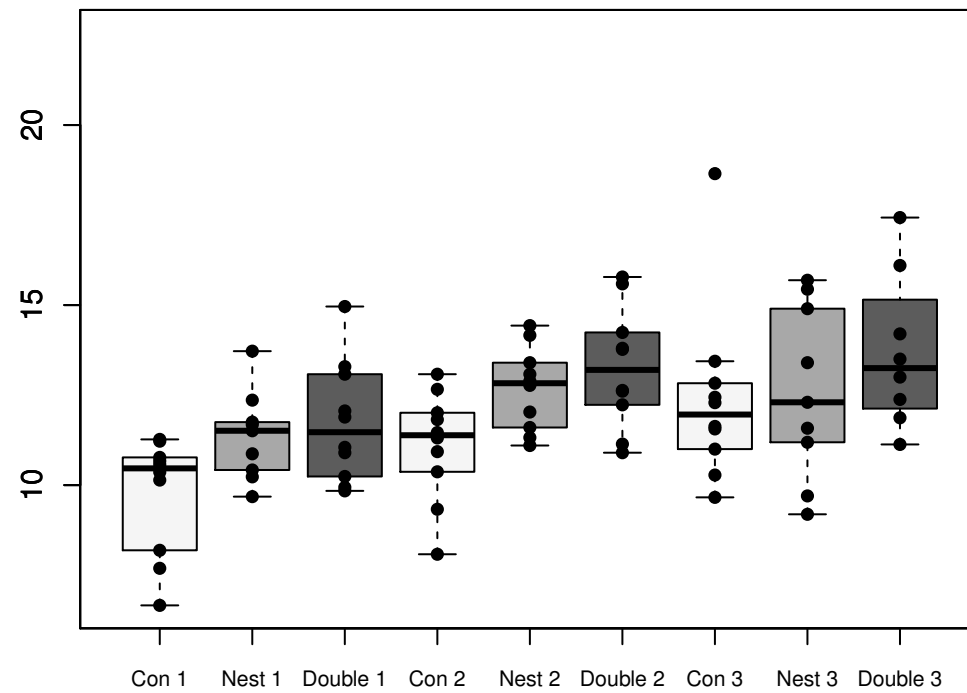

**B6 female**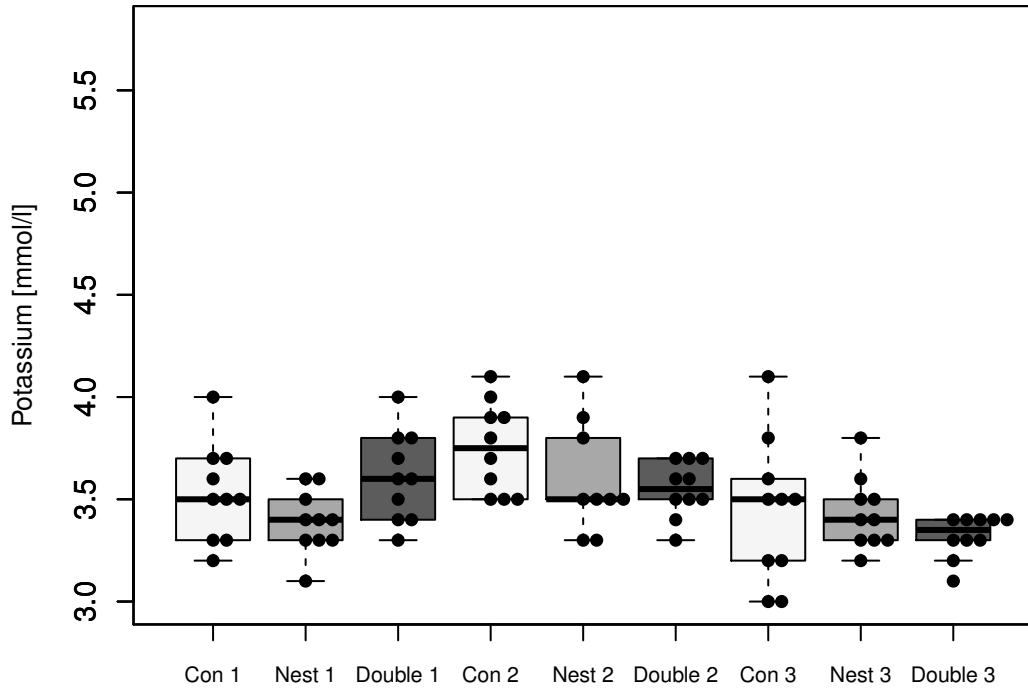**D2 female**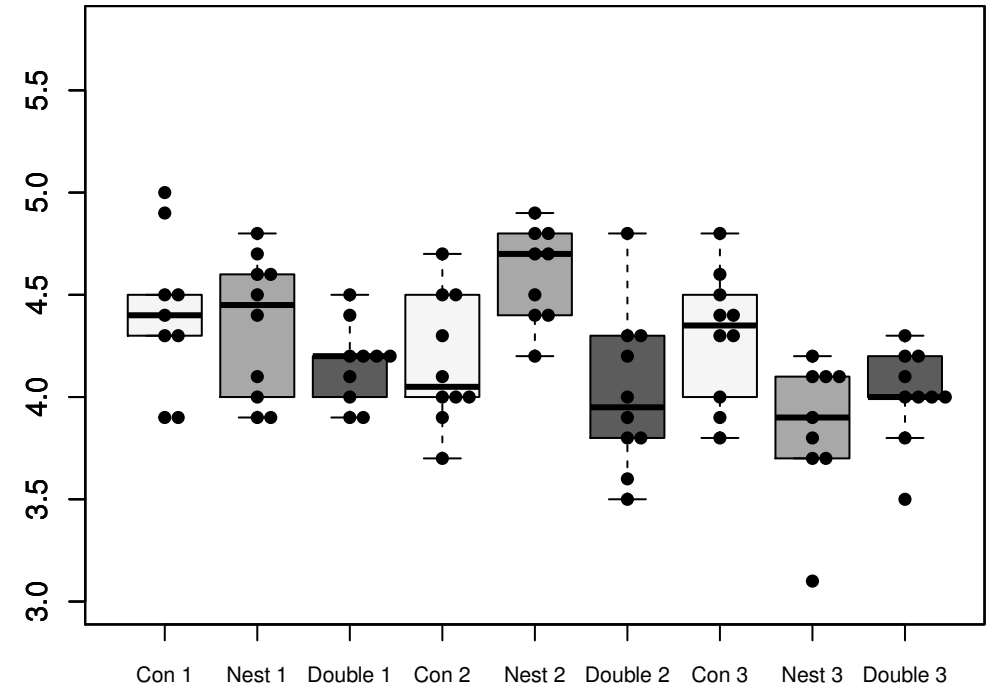**B6 male**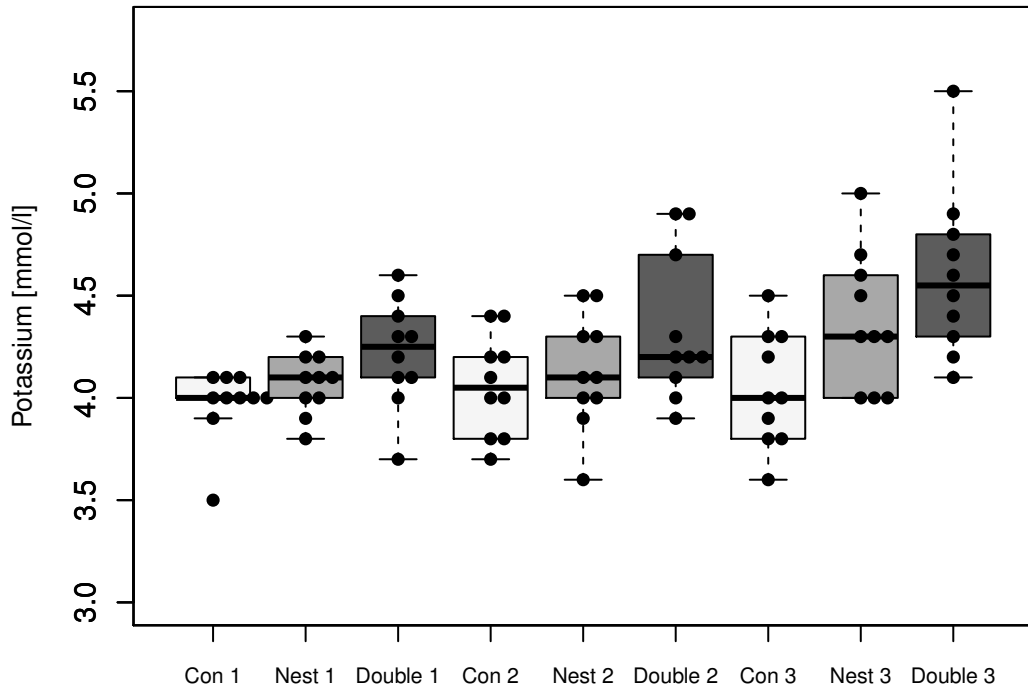**D2 male**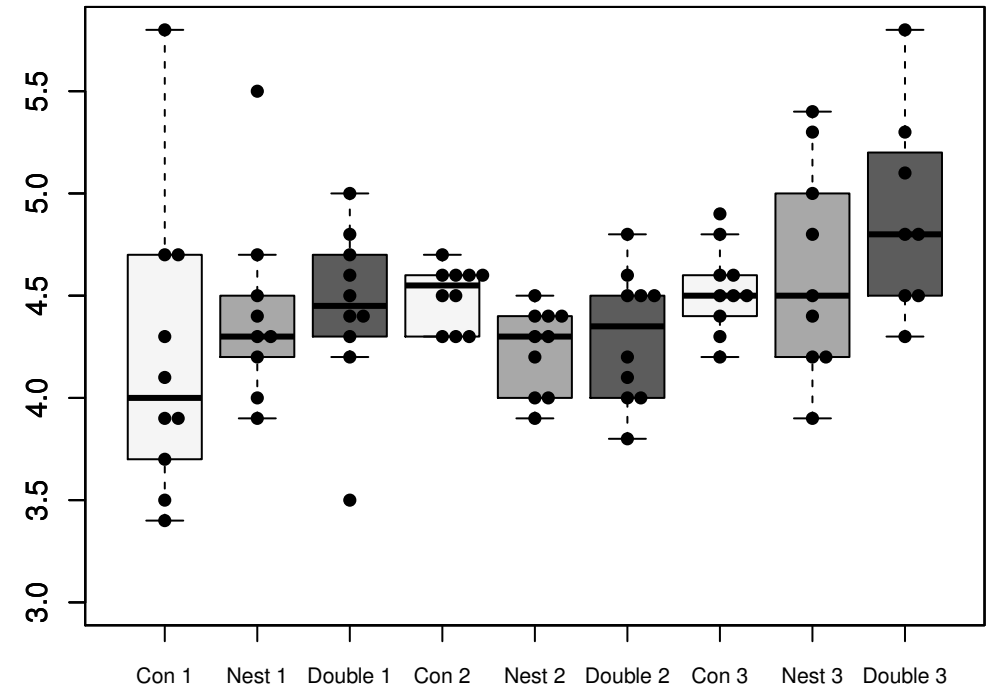



**B6 female**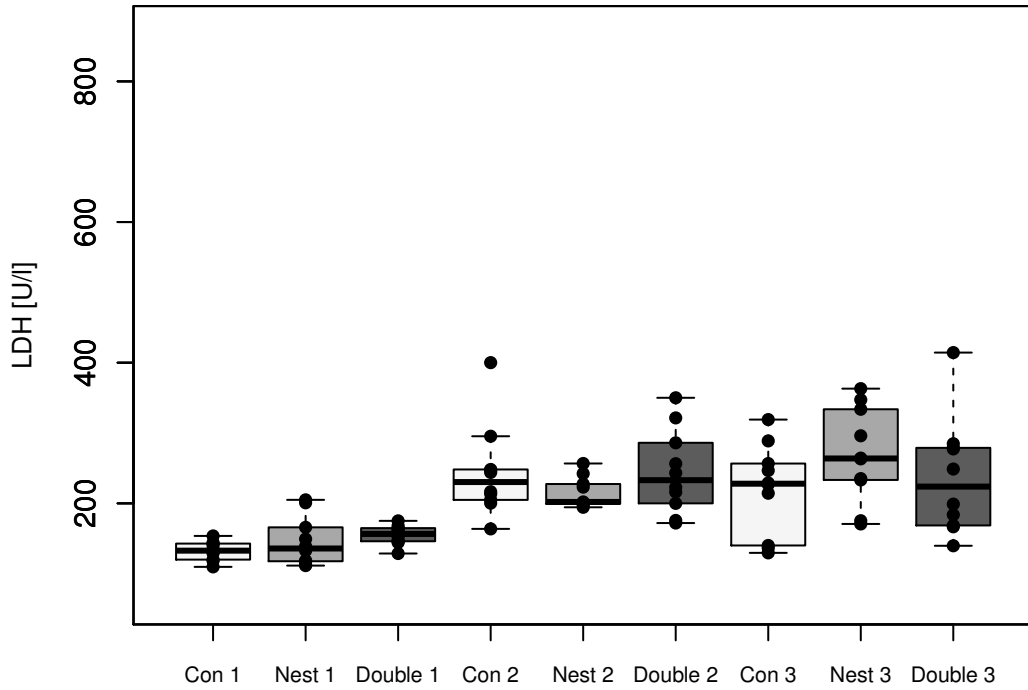**D2 female**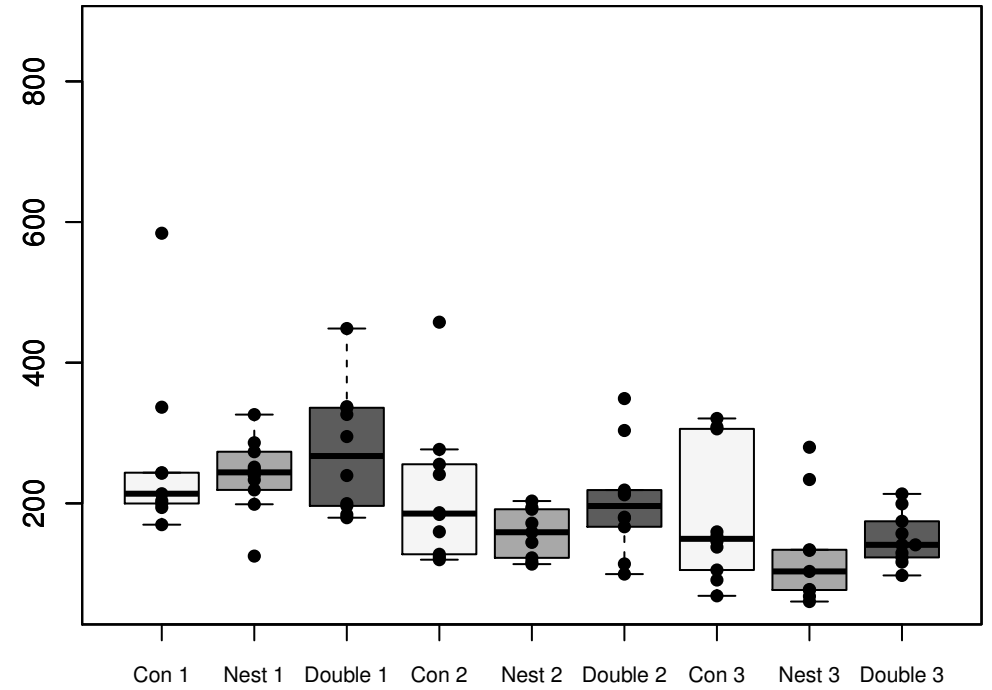**B6 male**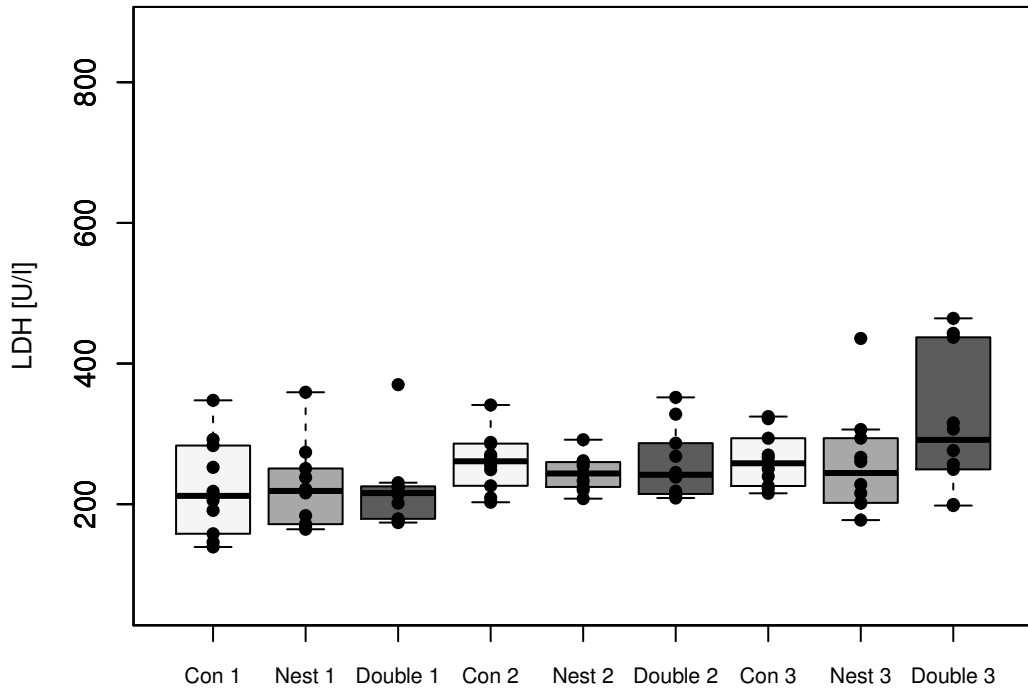**D2 male**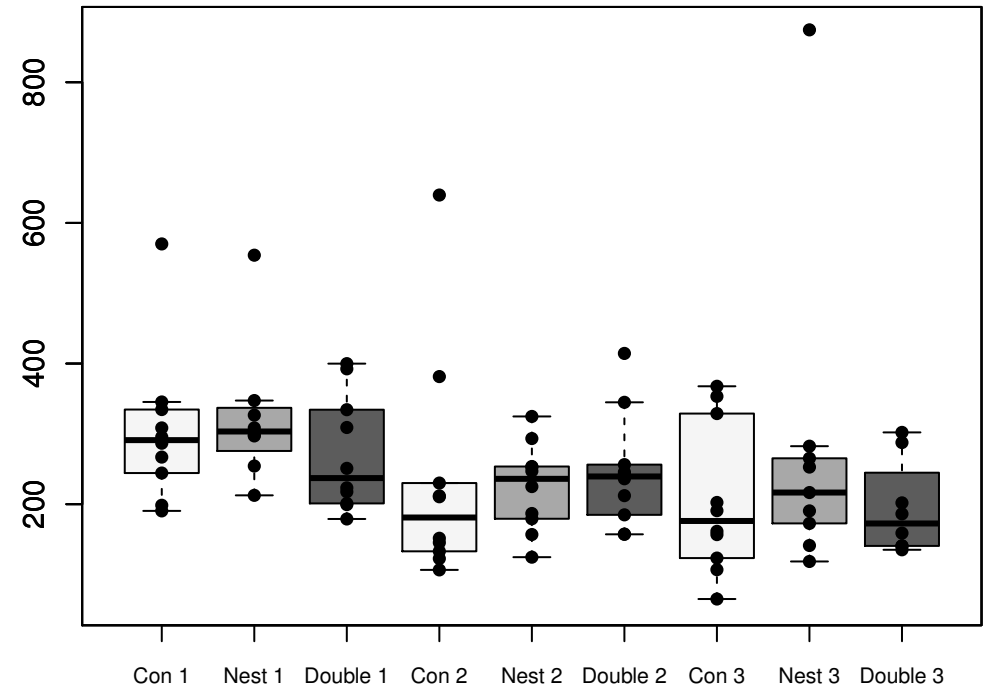

**B6 female**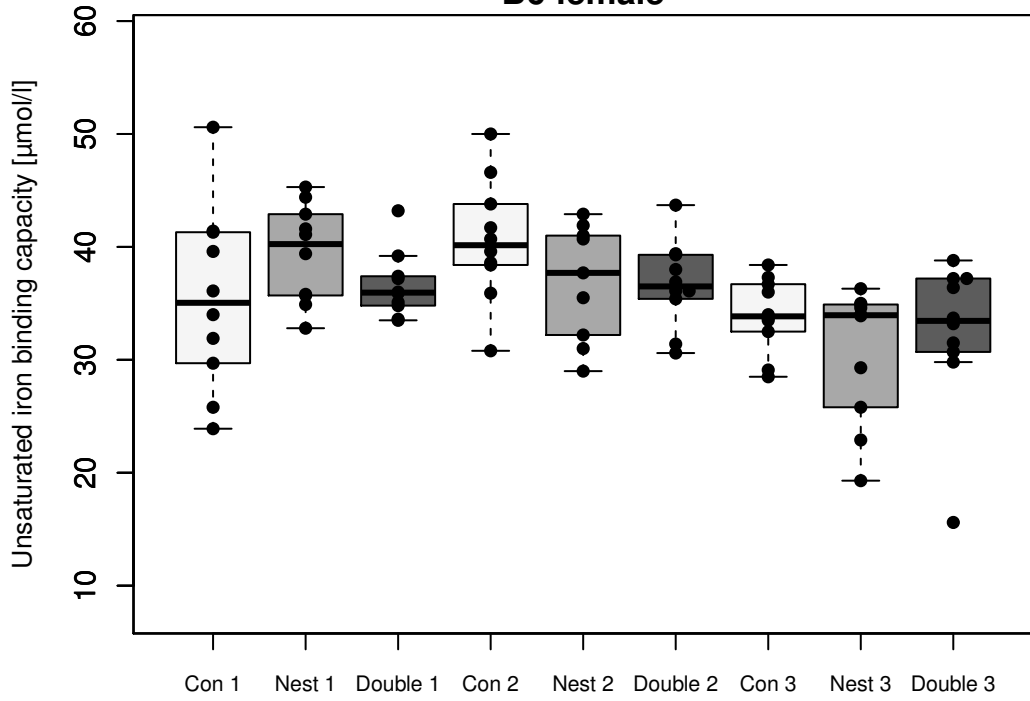**D2 female**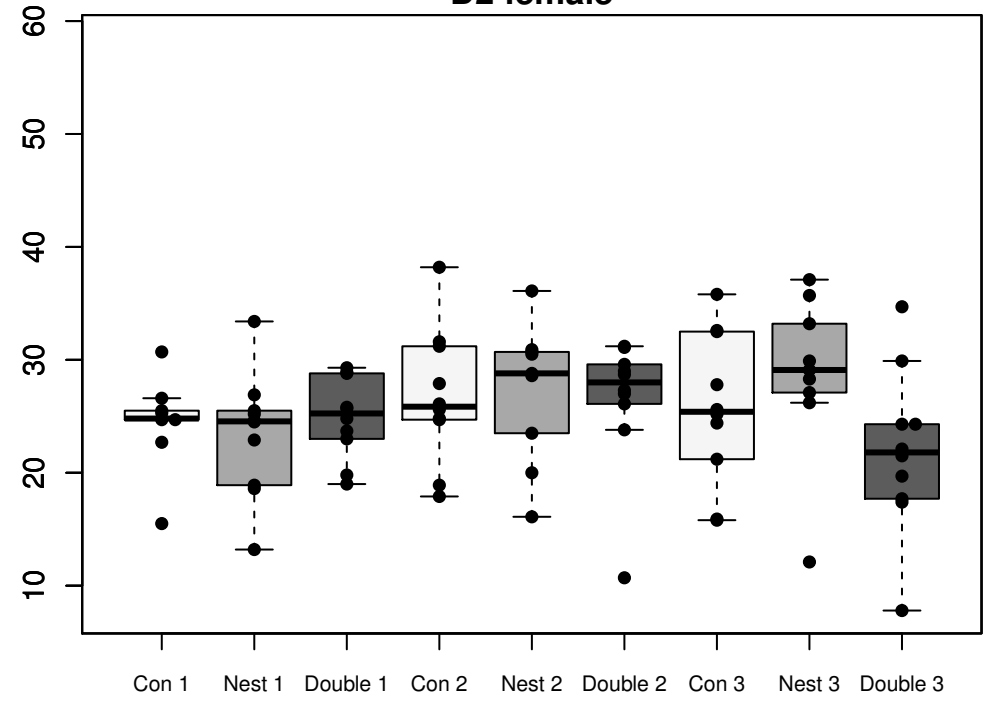**B6 male**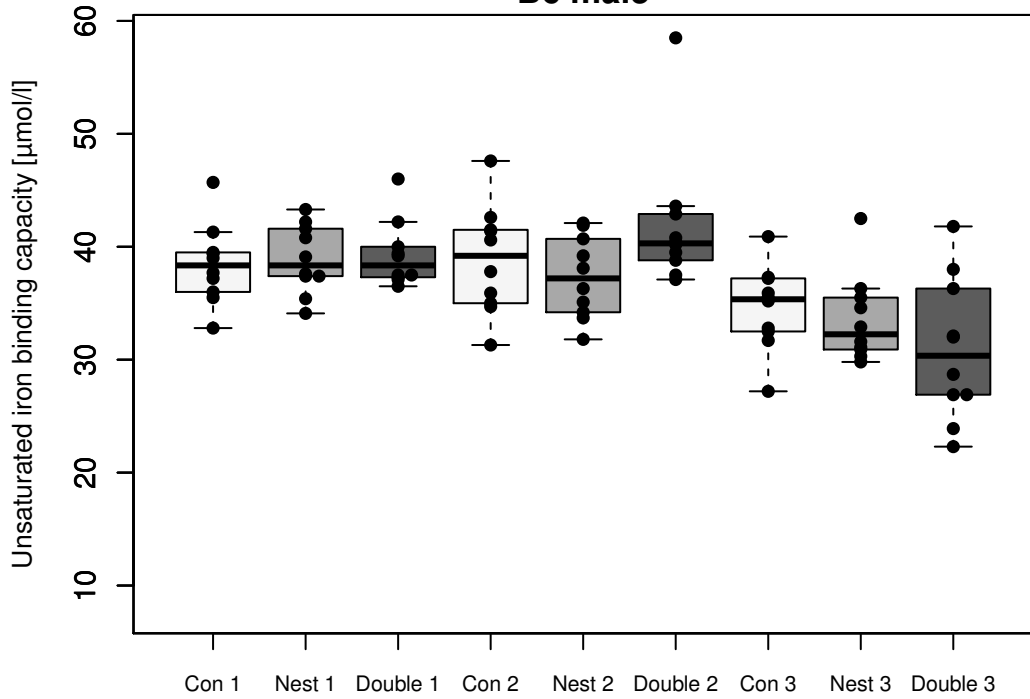**D2 male**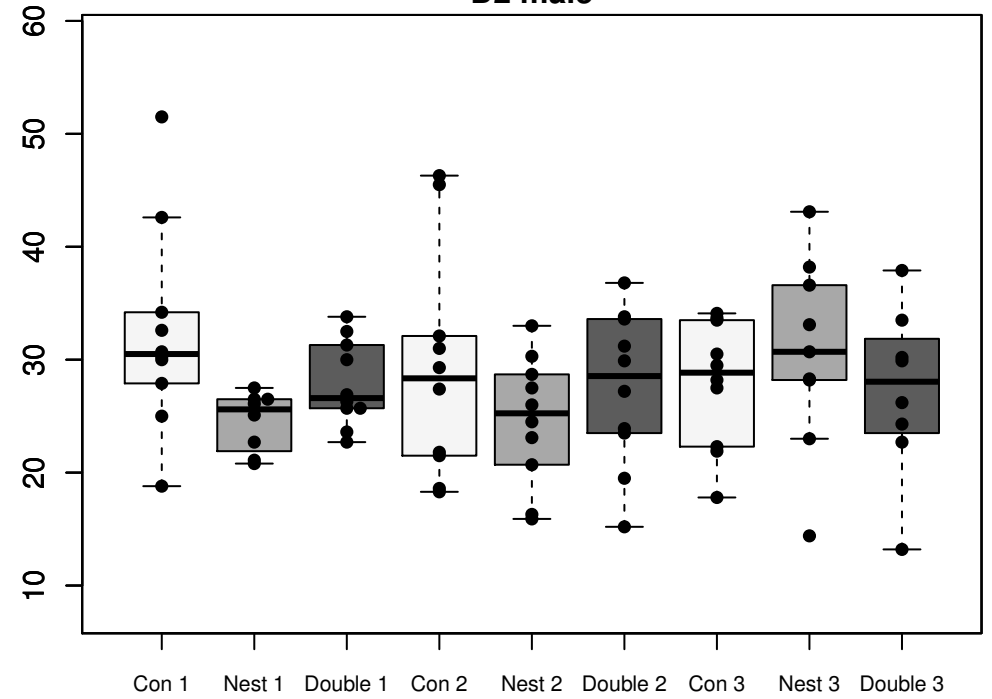

**B6 female**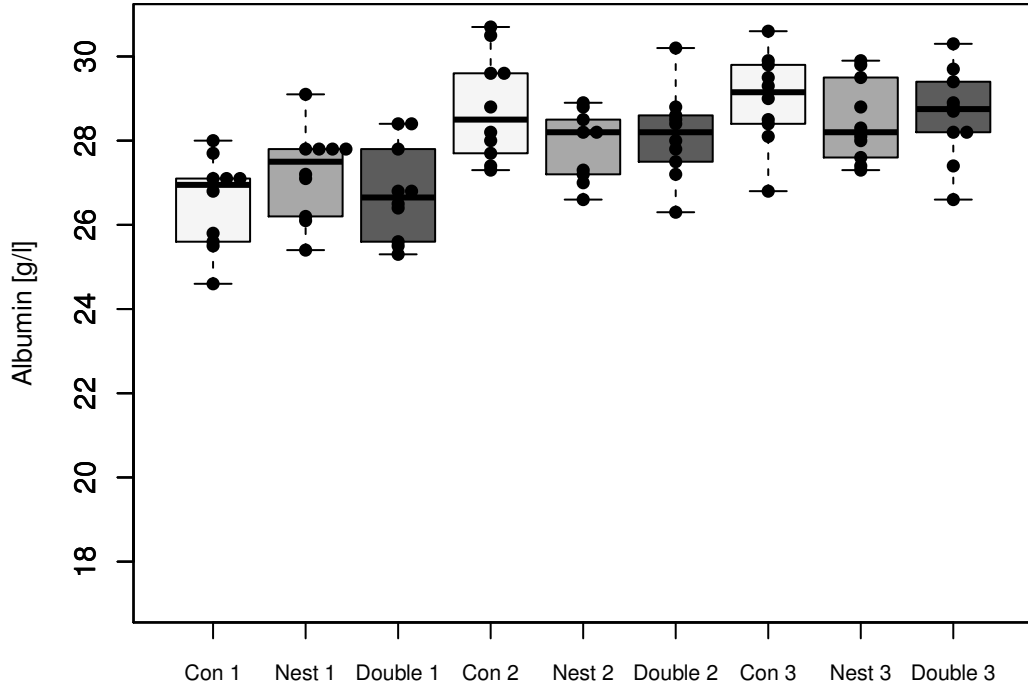**D2 female**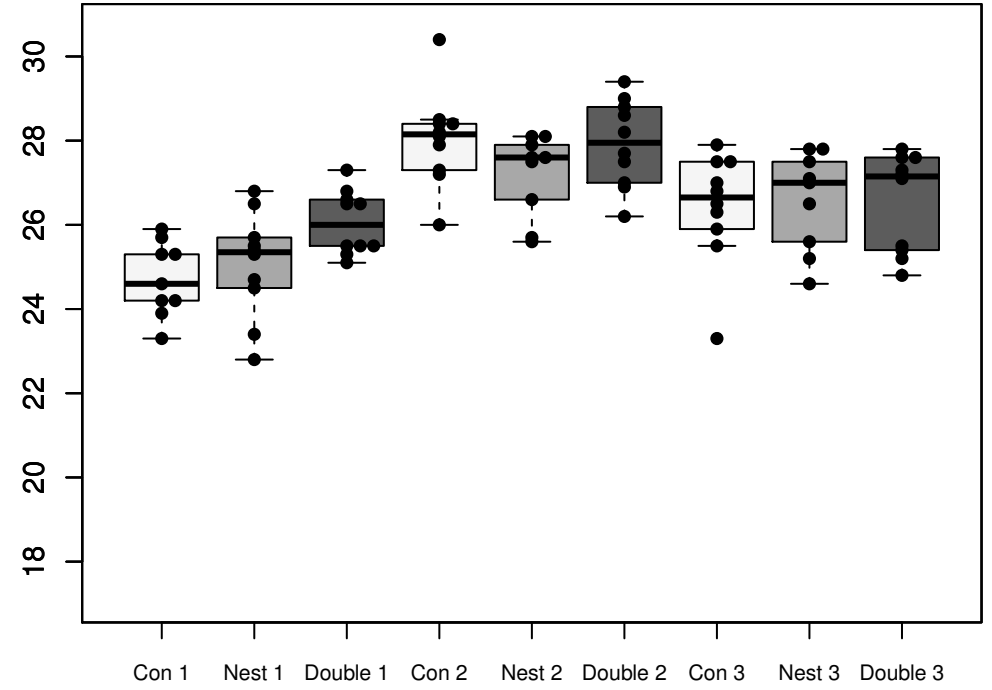**B6 male**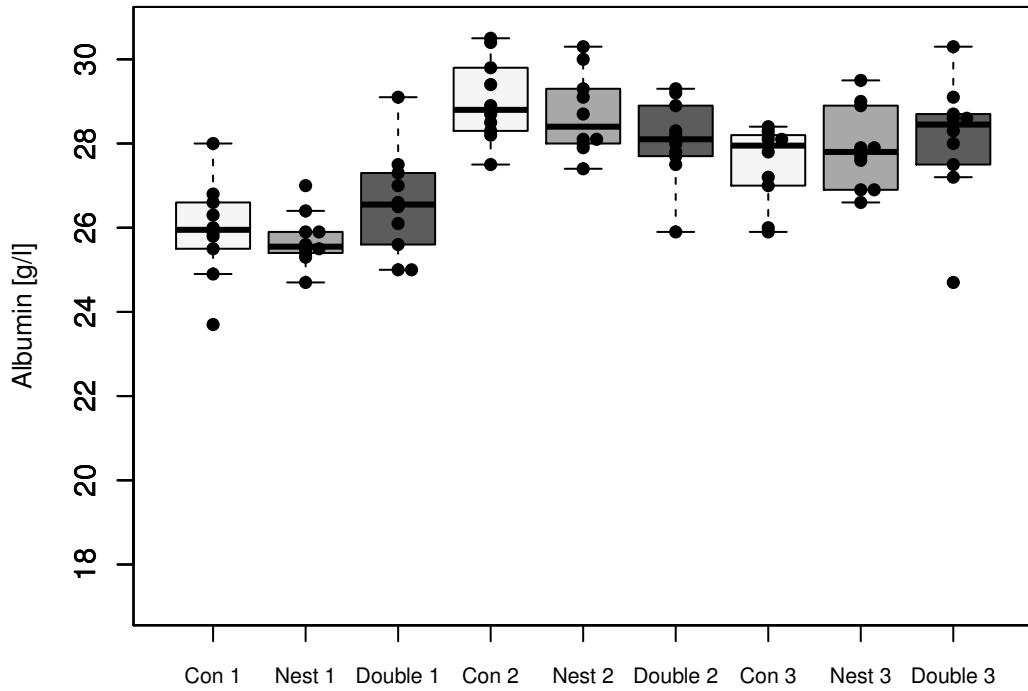**D2 male**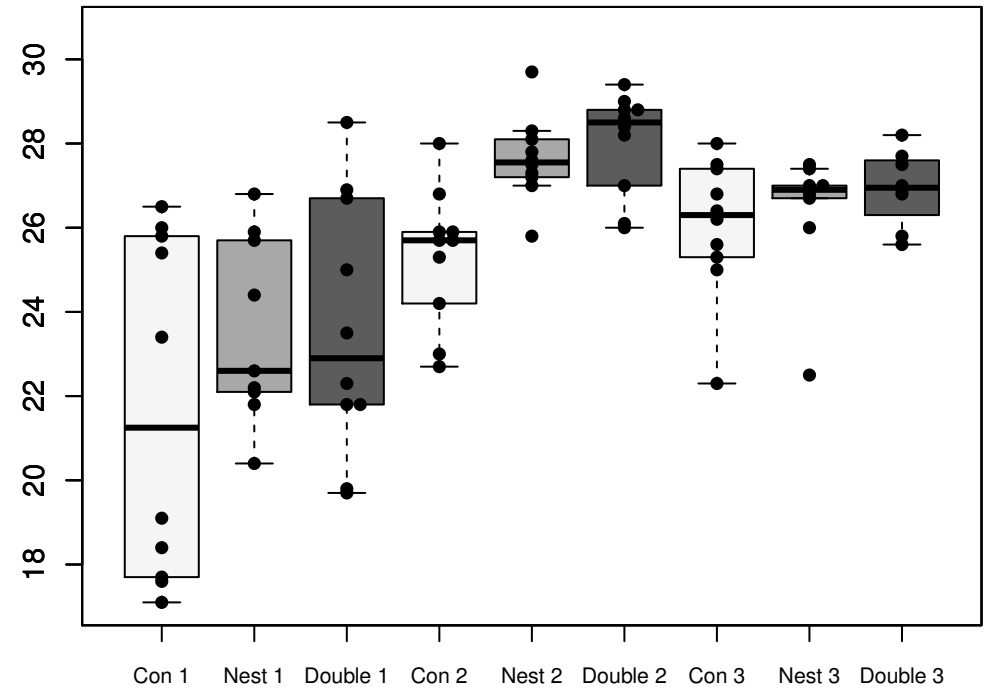

**B6 female**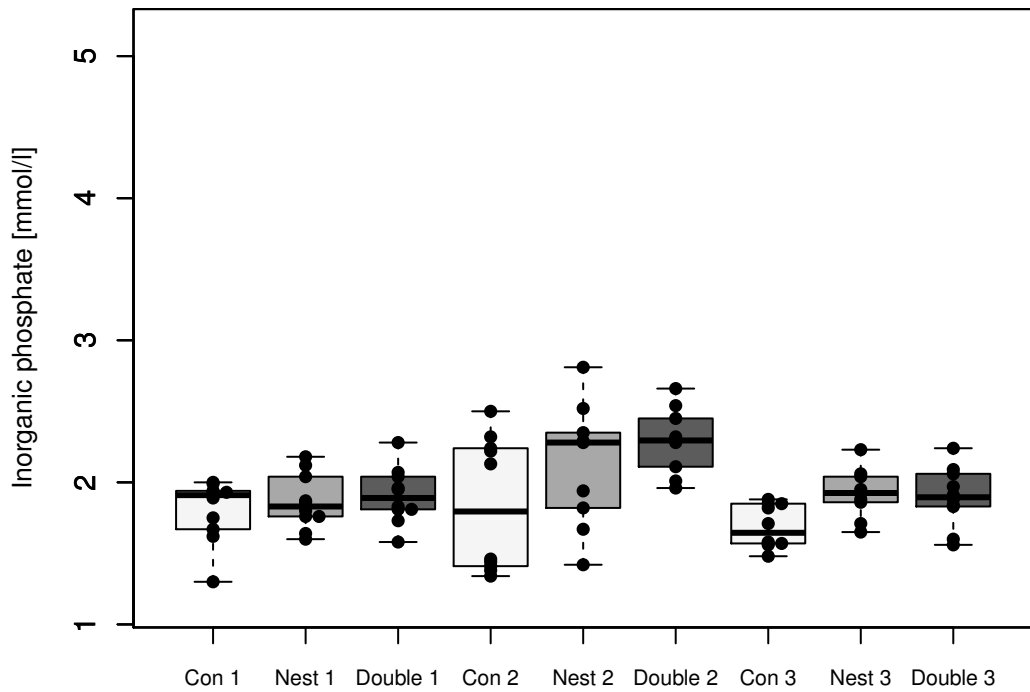**D2 female**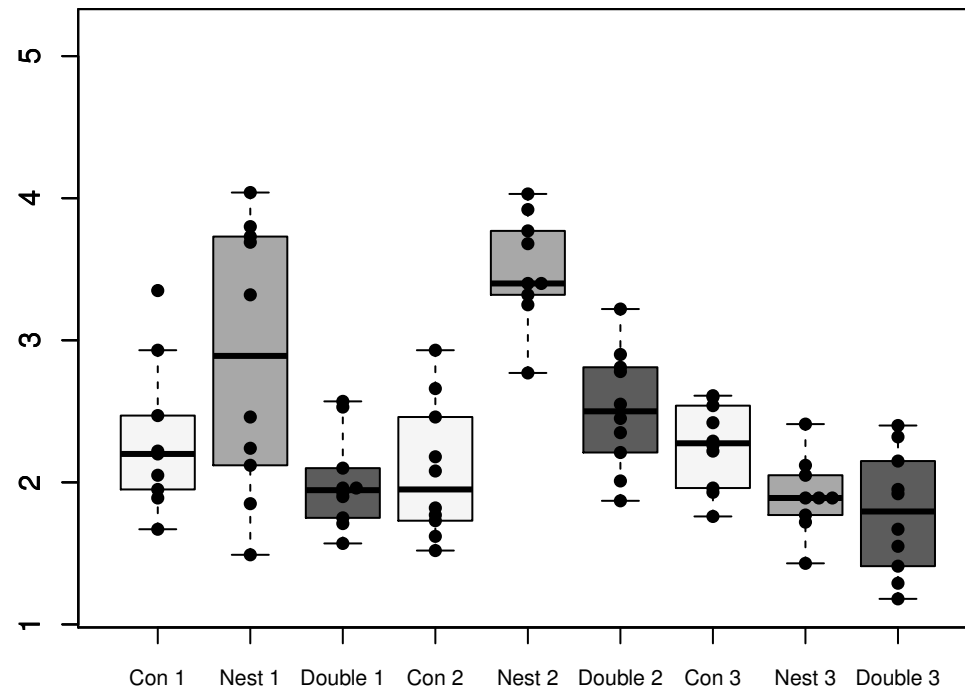**B6 male**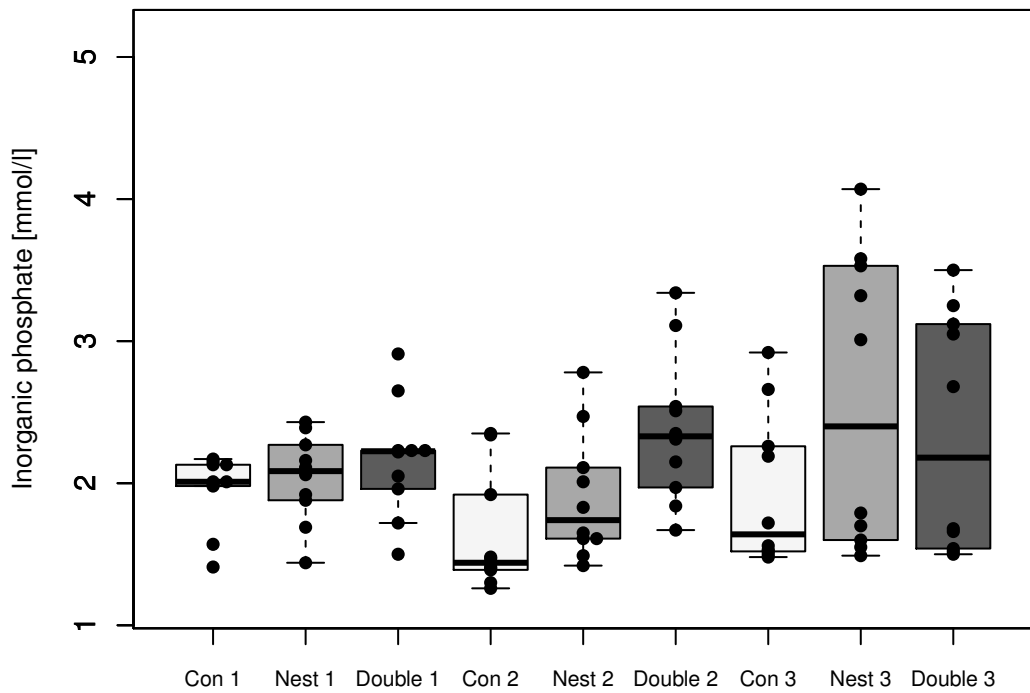**D2 male**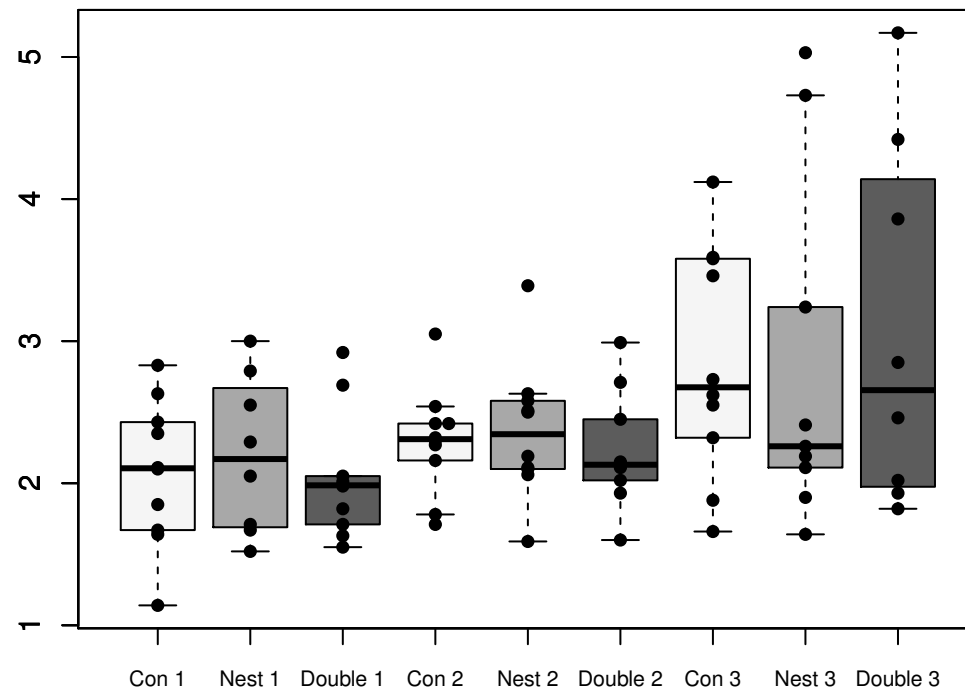

**B6 female**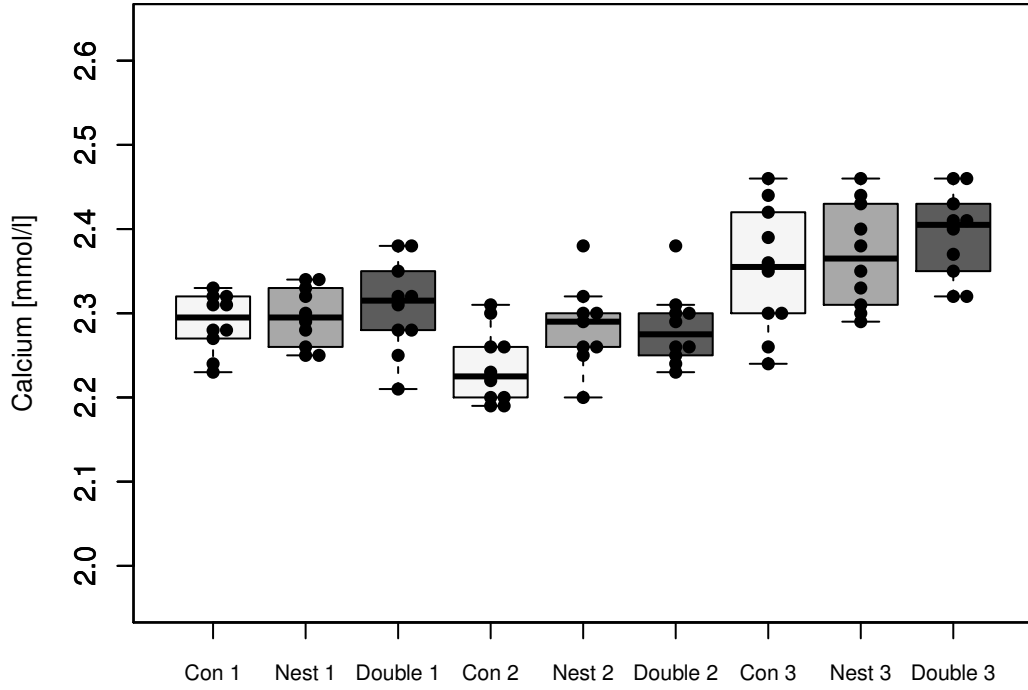**D2 female**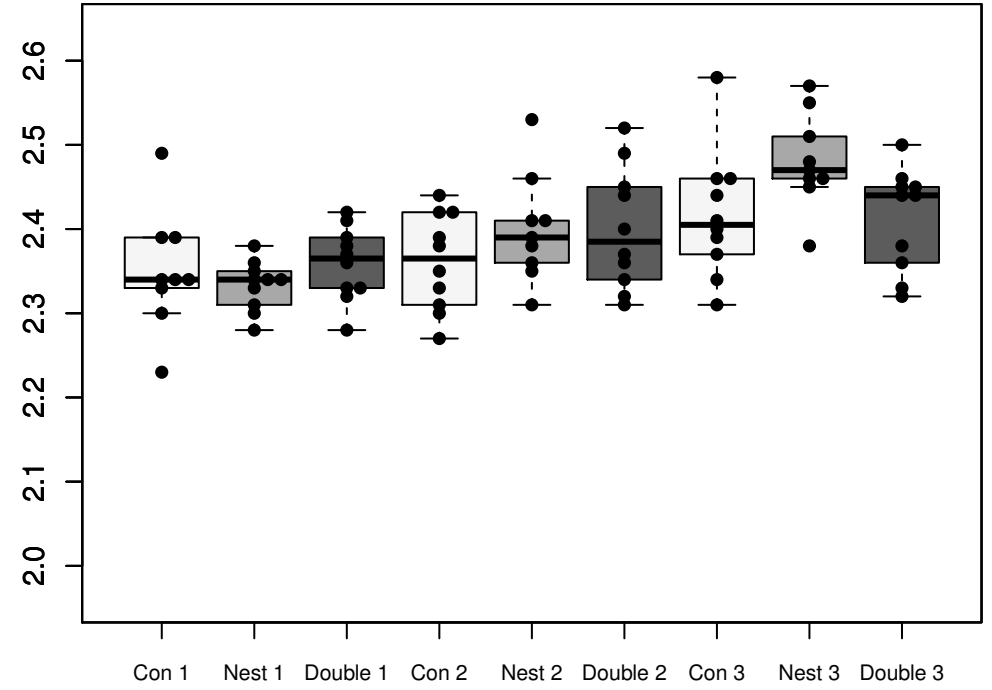**B6 male**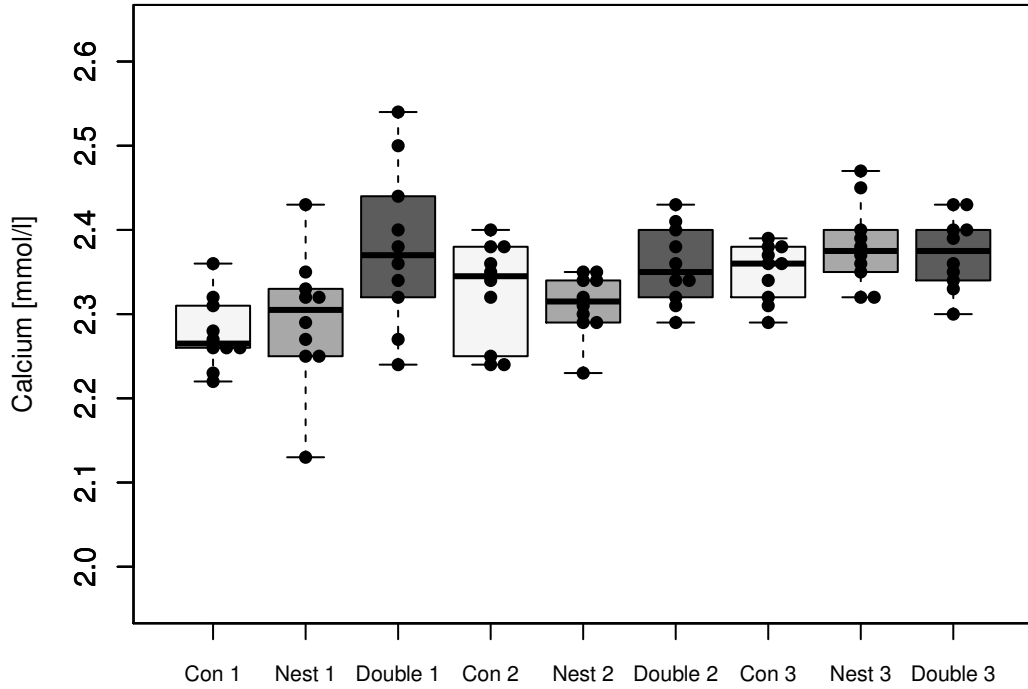**D2 male**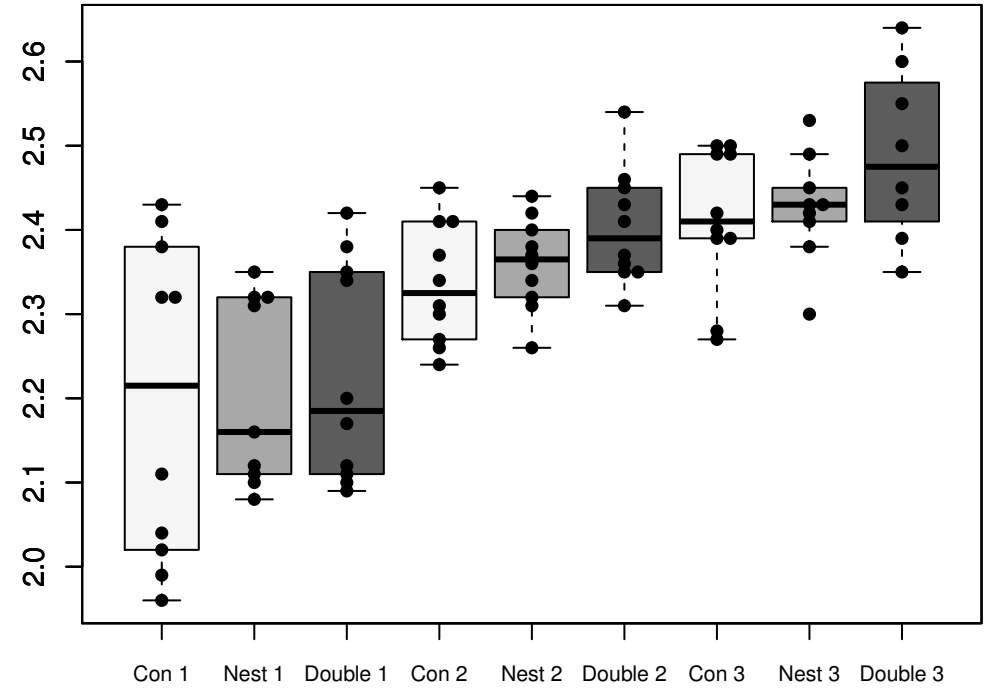

**B6 female**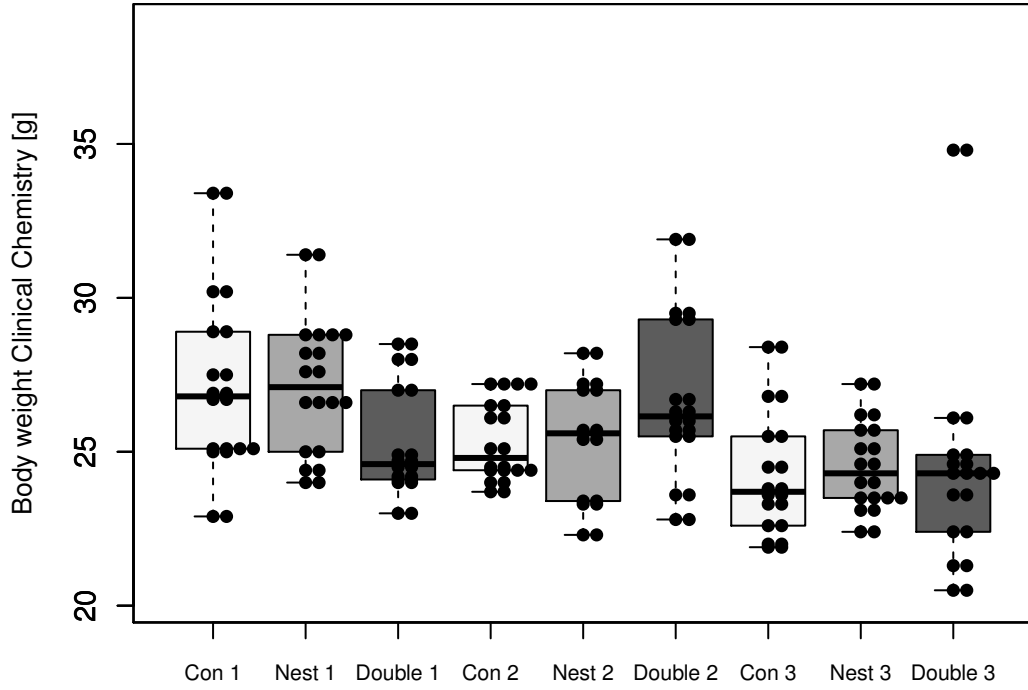**D2 female**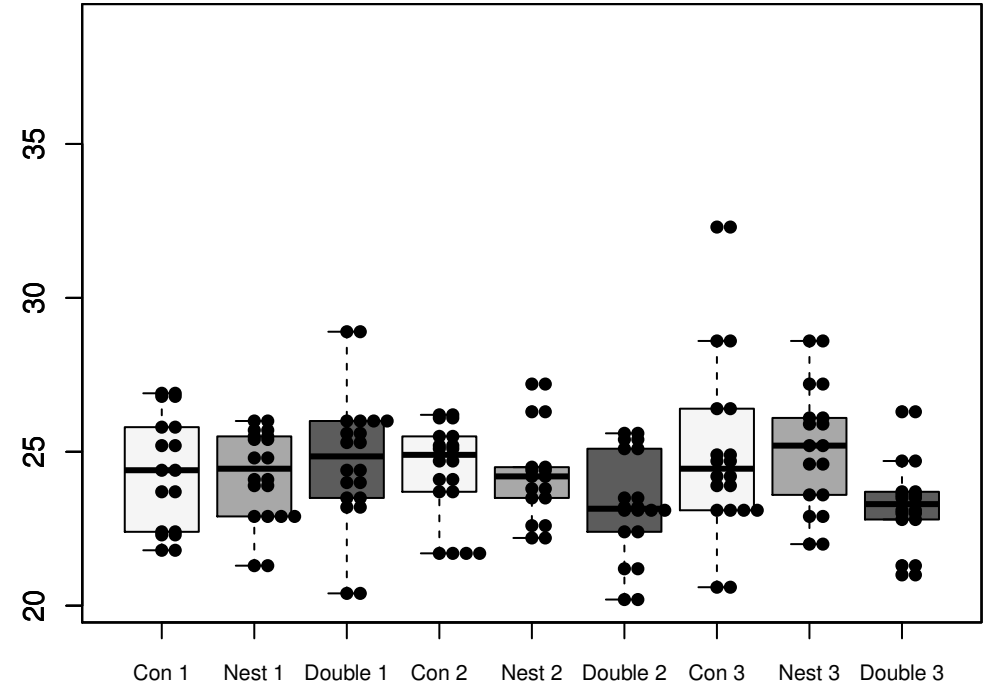**B6 male**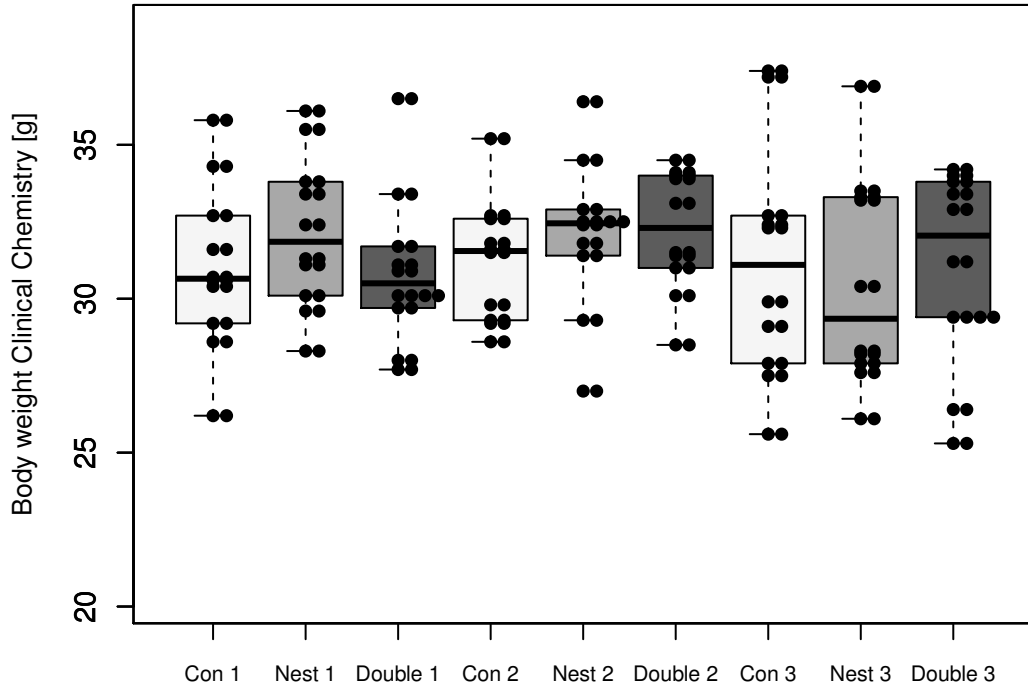**D2 male**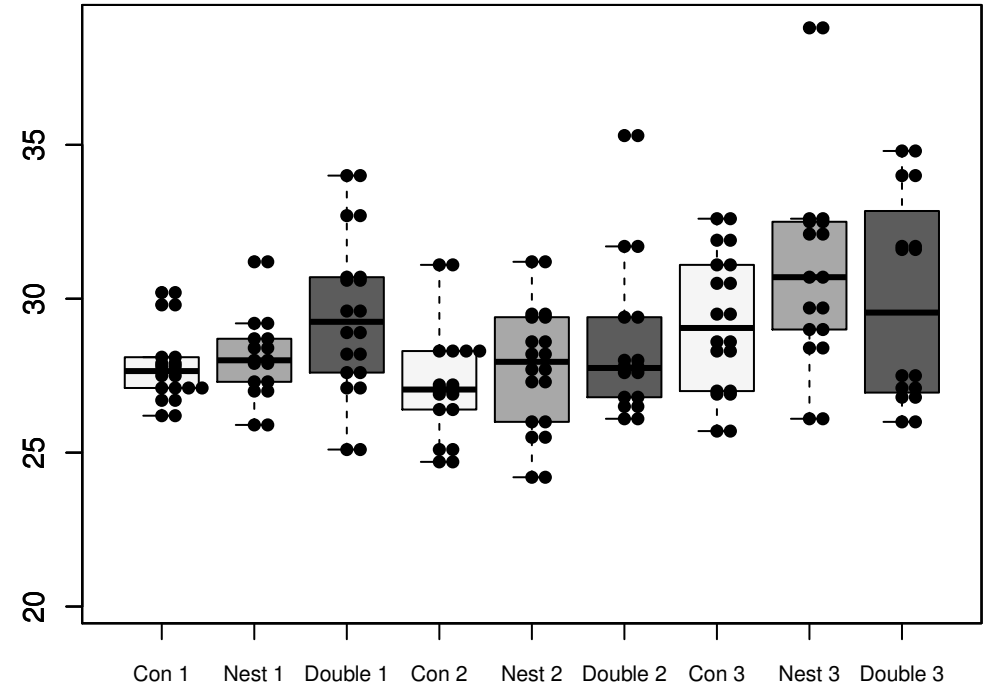

**B6 female**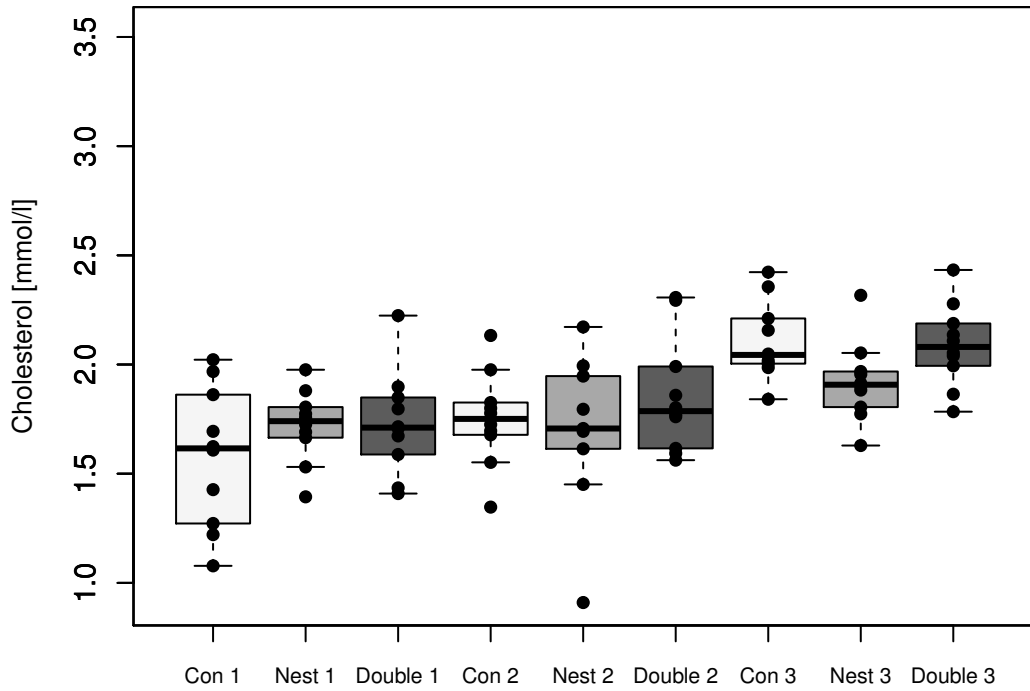**D2 female**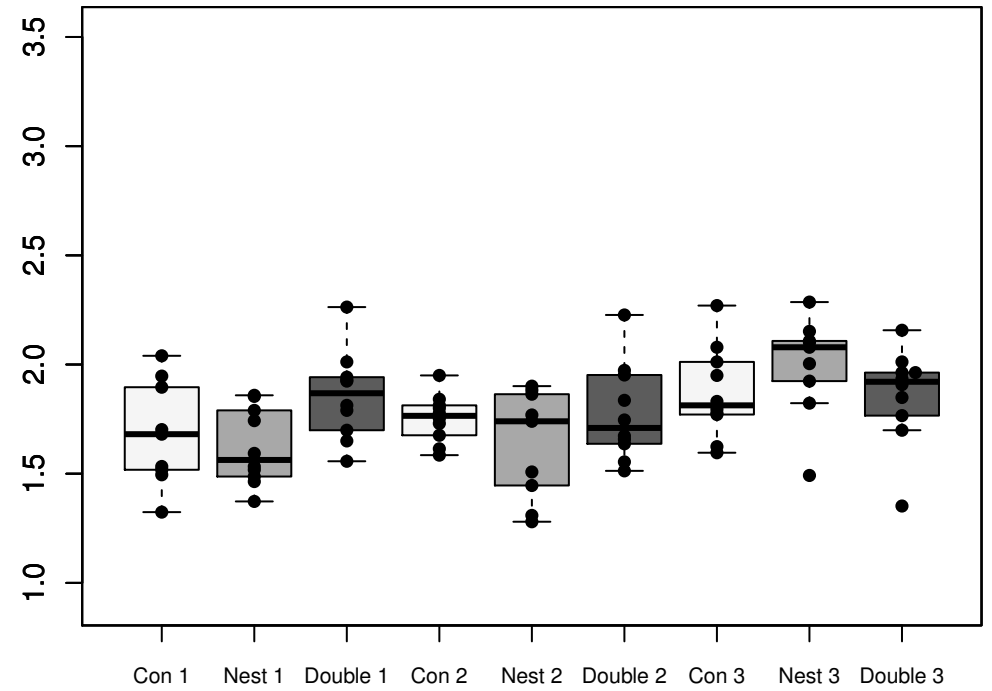**B6 male**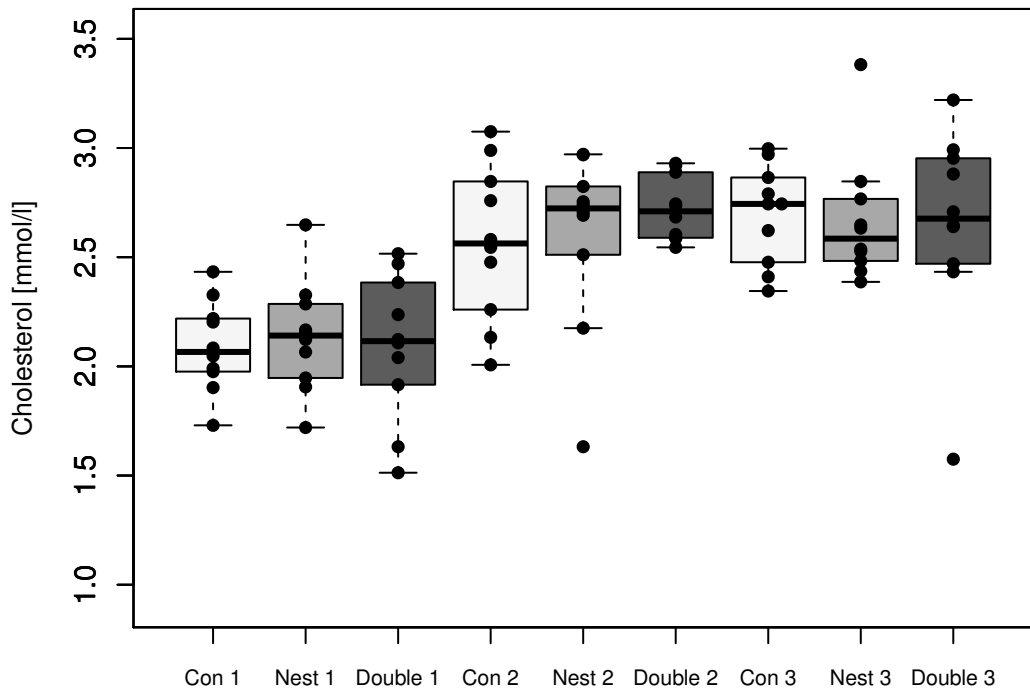**D2 male**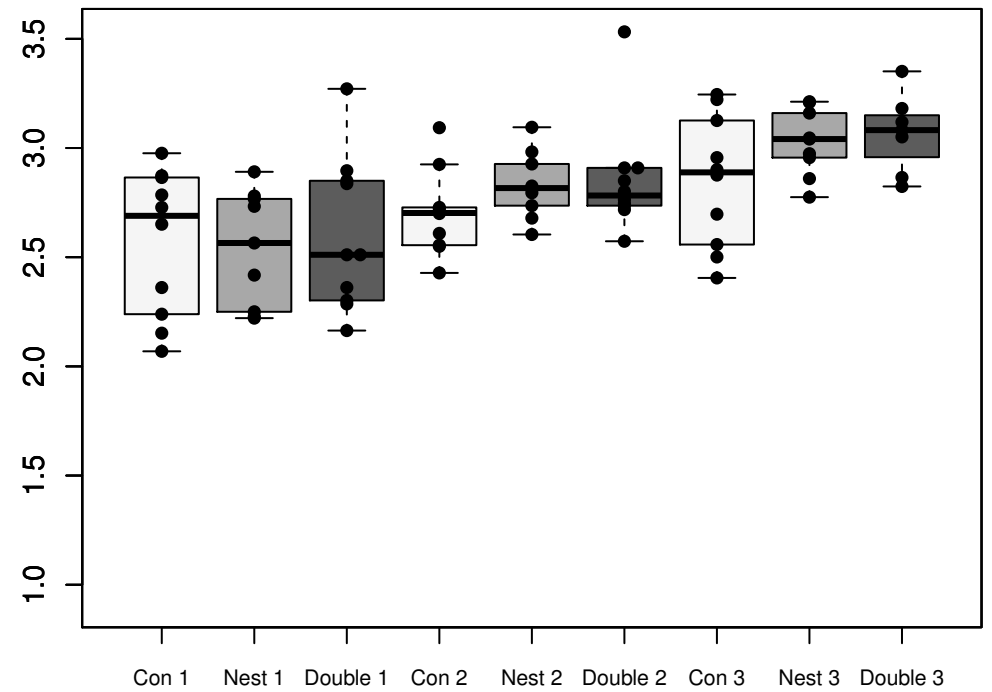

**B6 female**

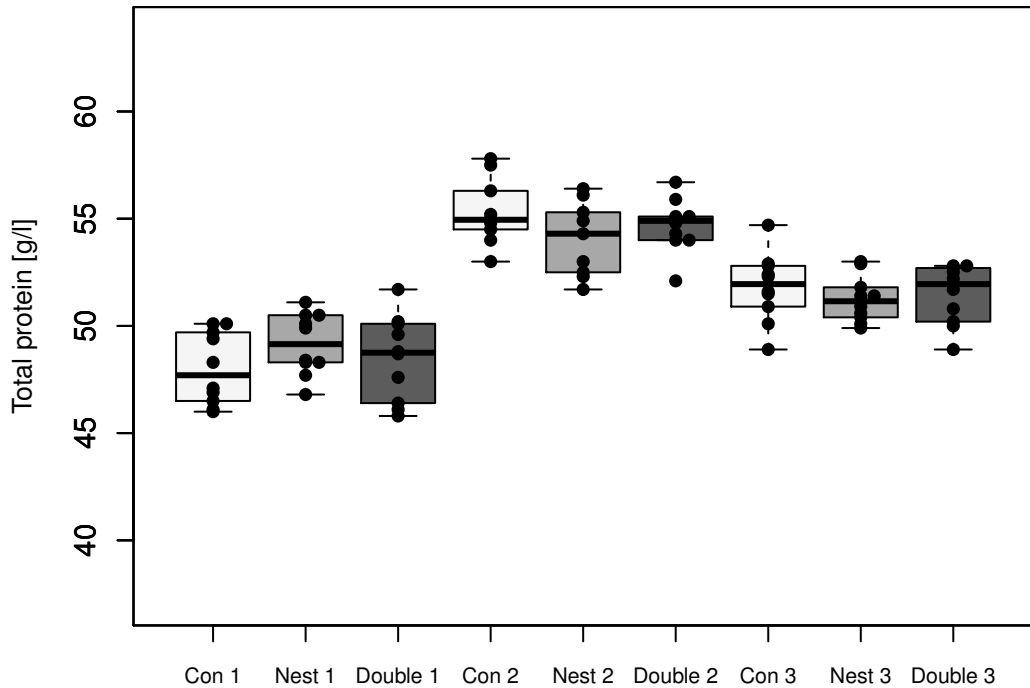

**D2 female**

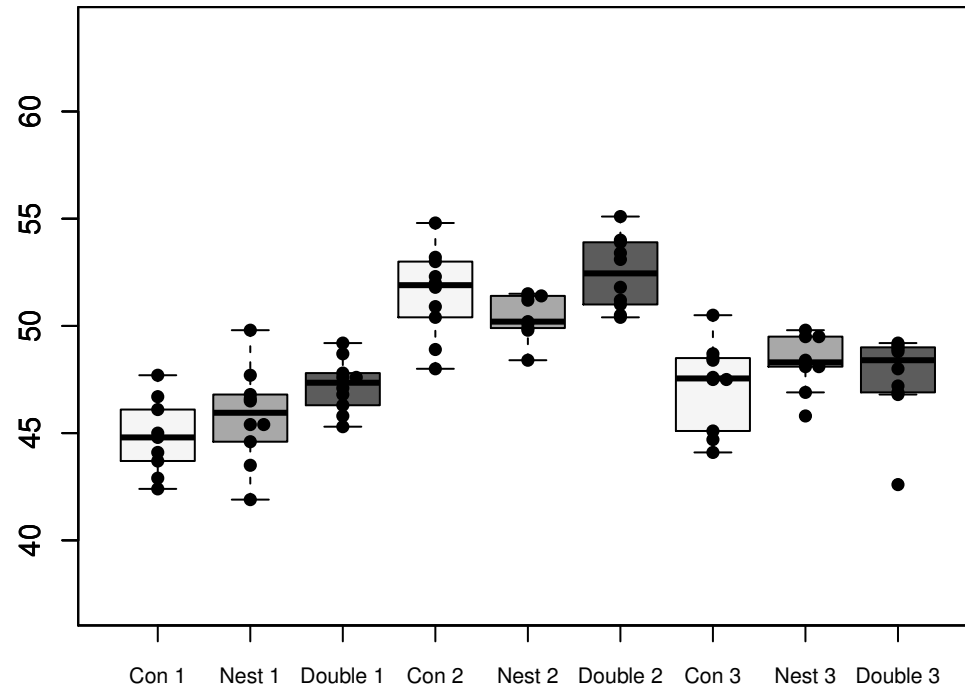

**B6 male**

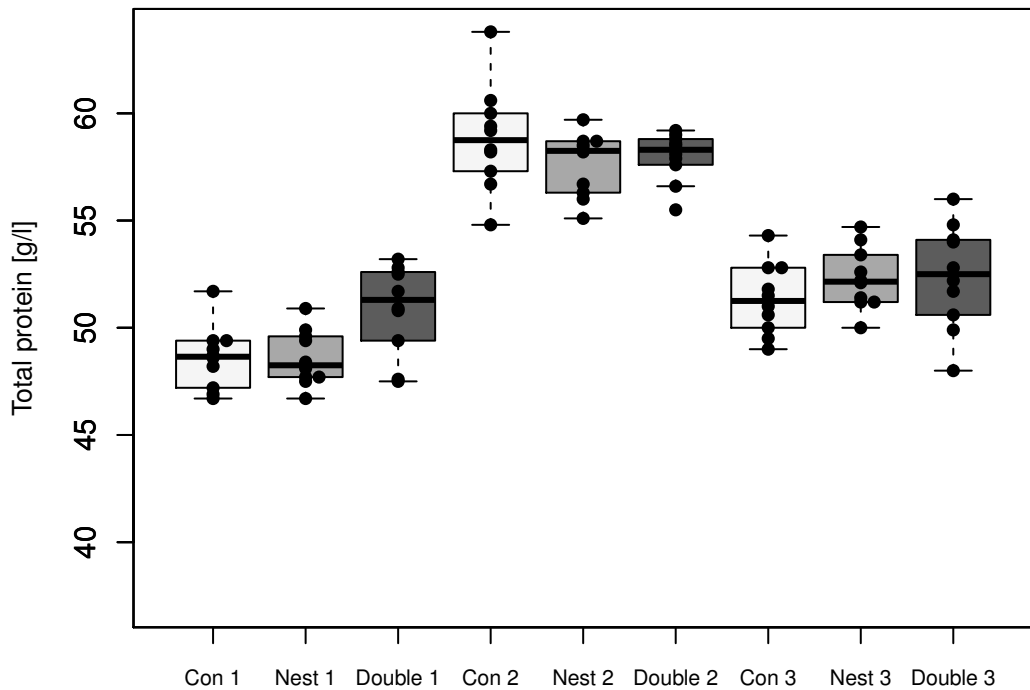

**D2 male**

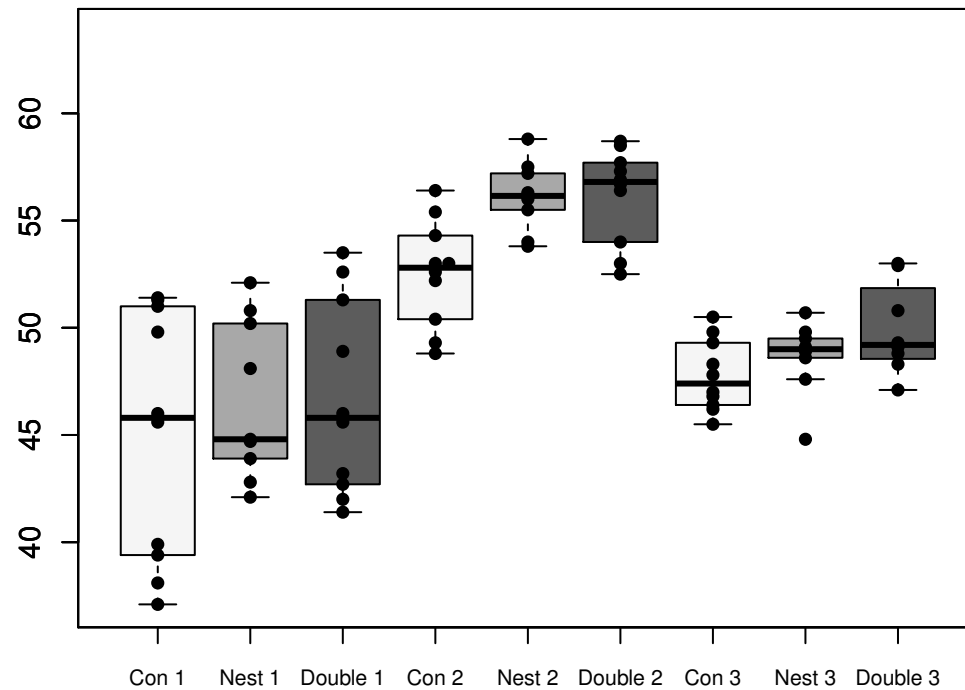



**B6 female**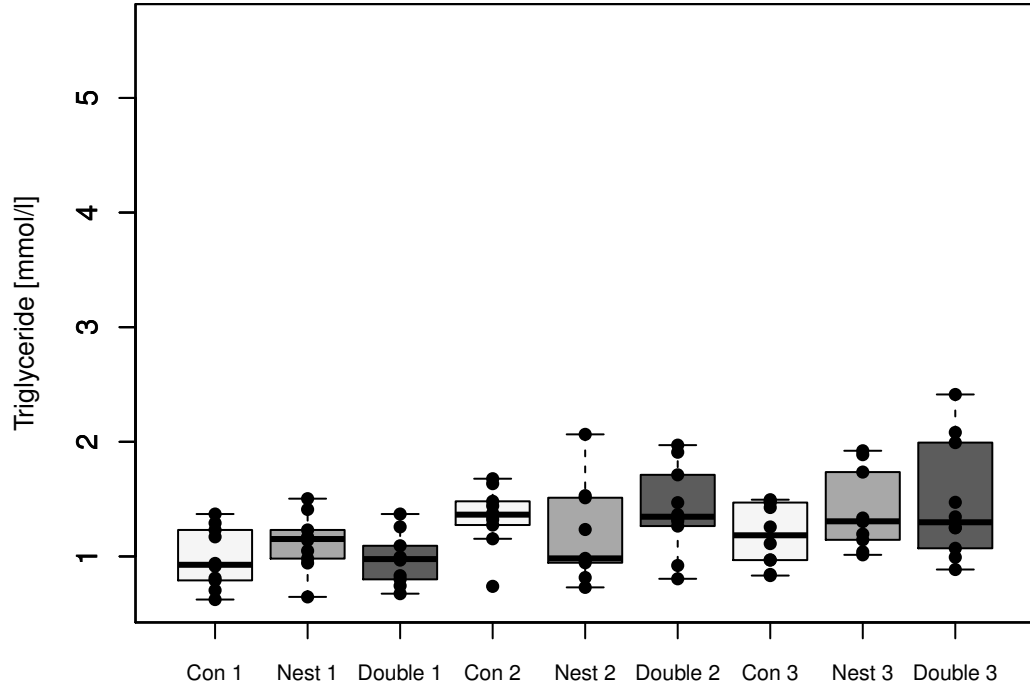**D2 female**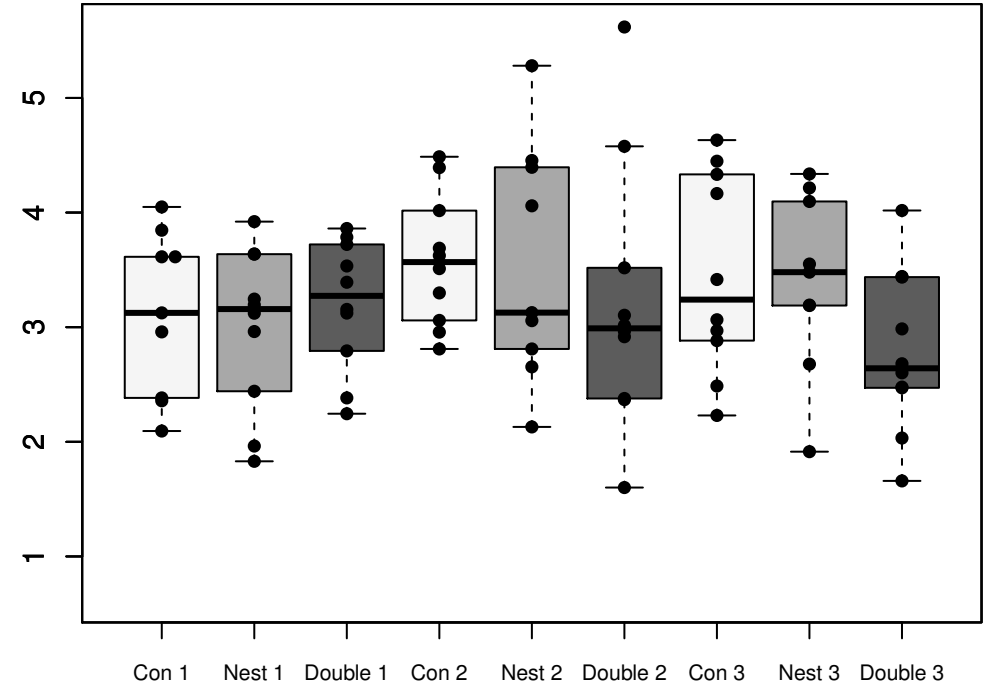**B6 male**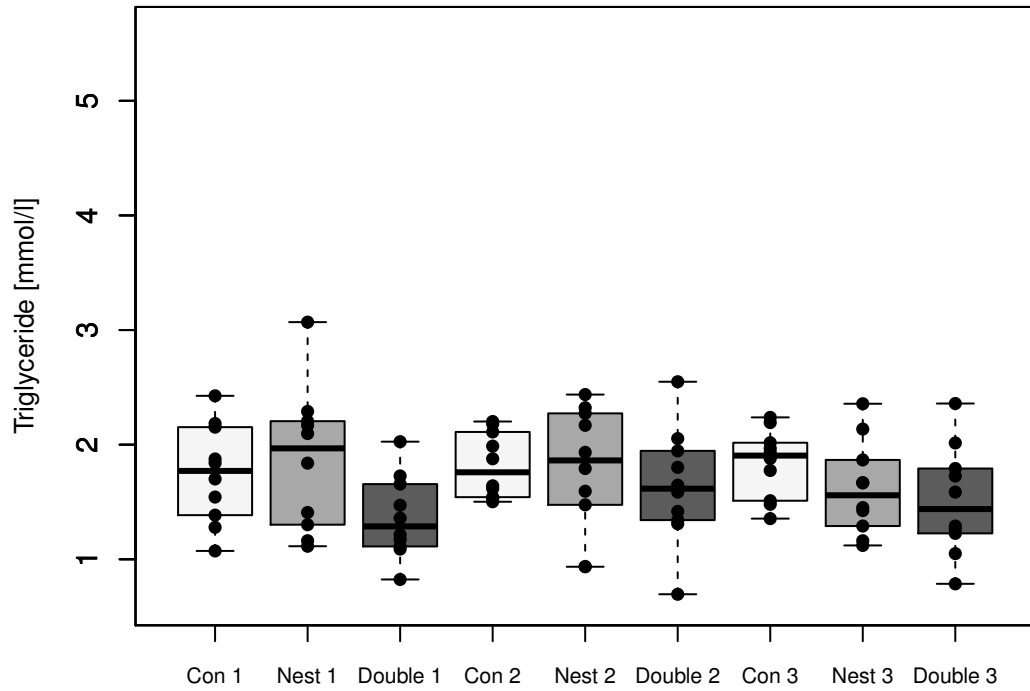**D2 male**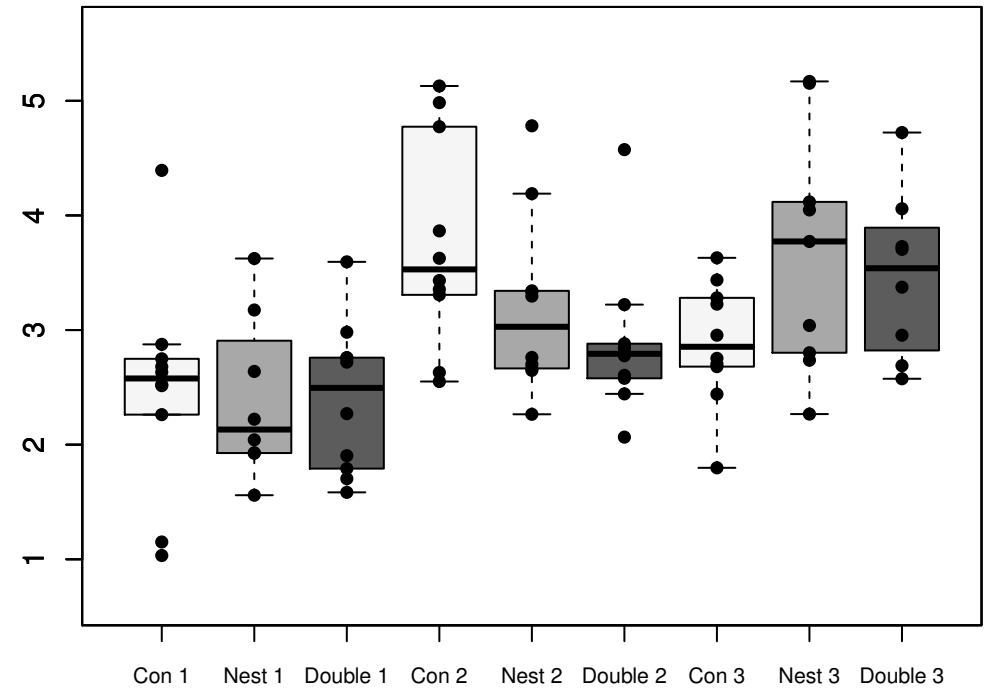

**B6 female**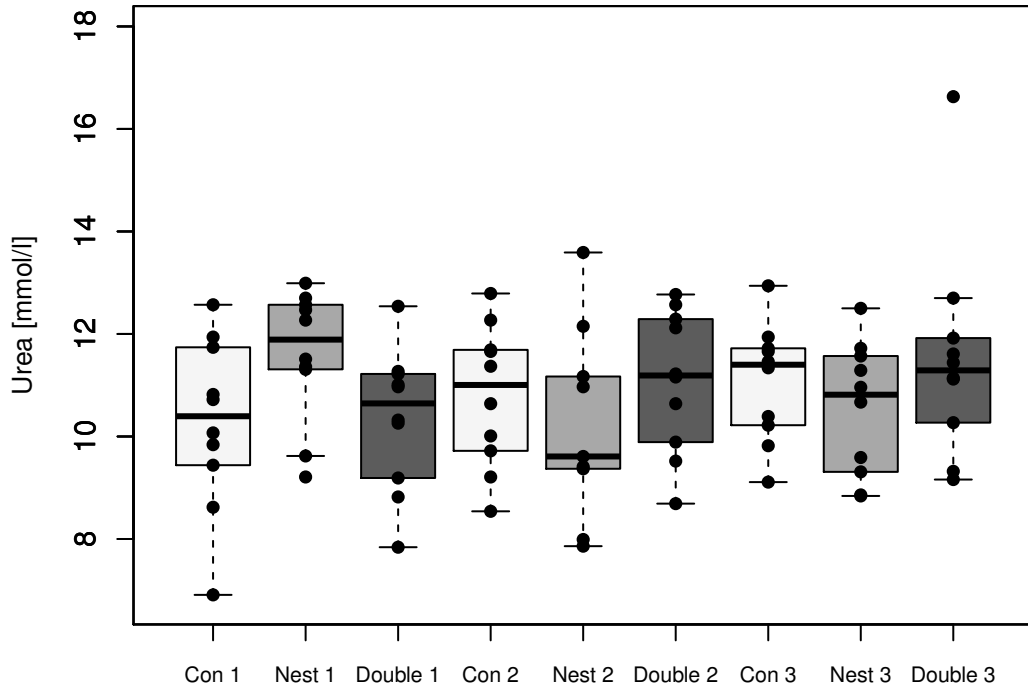**D2 female**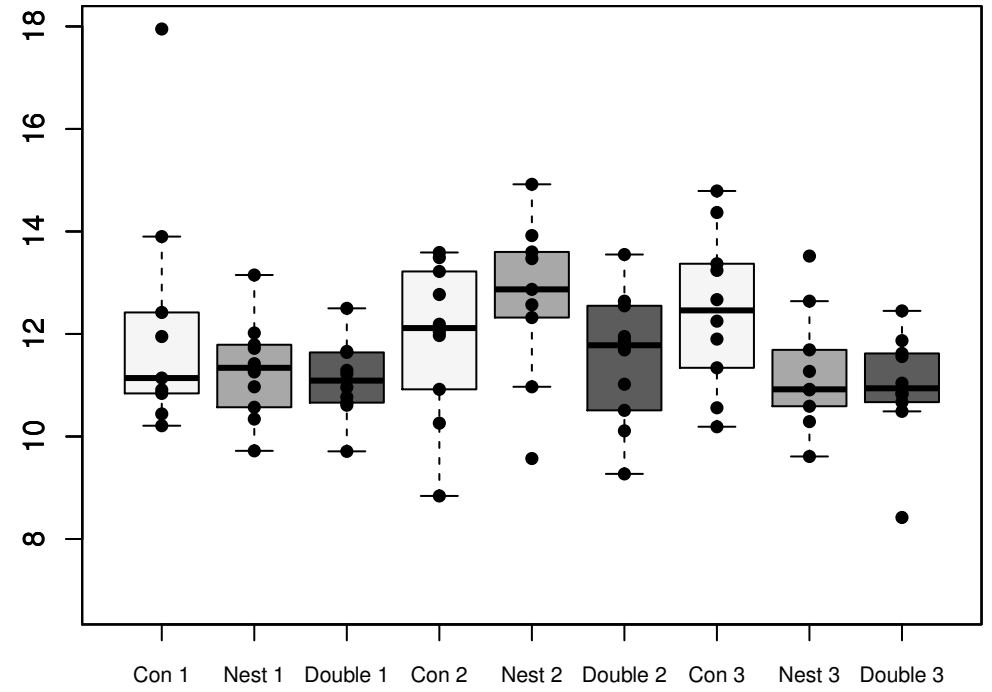**B6 male**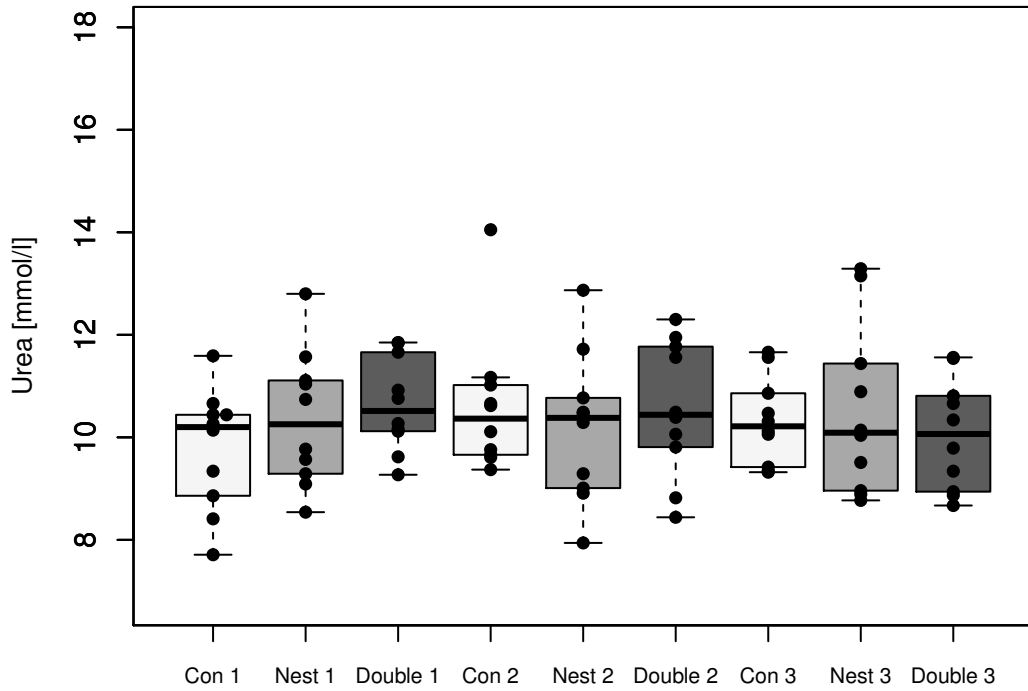**D2 male**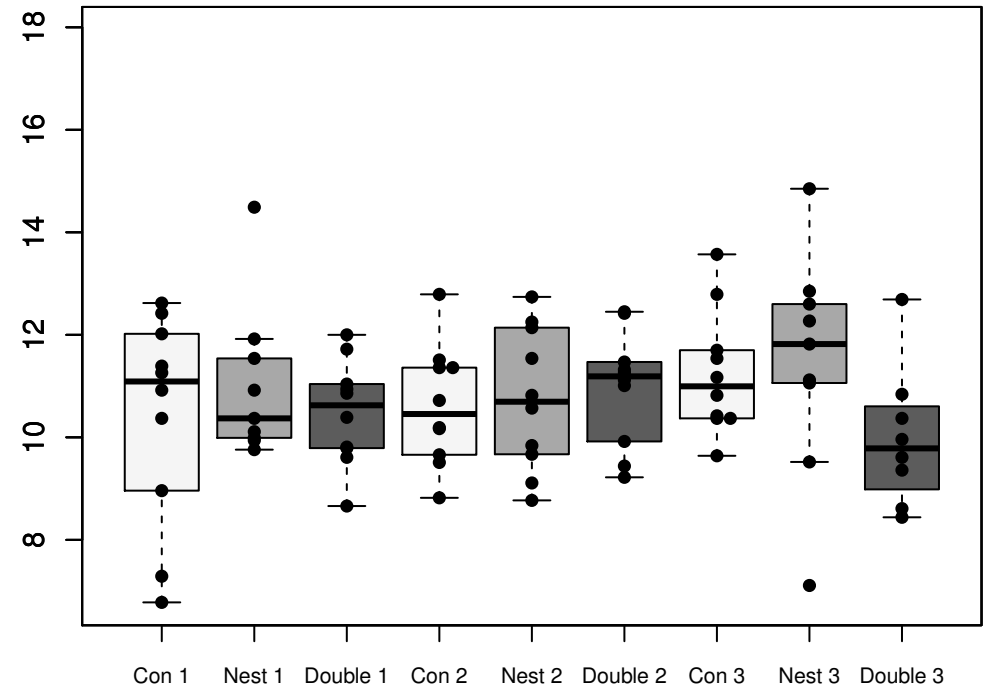

**B6 female**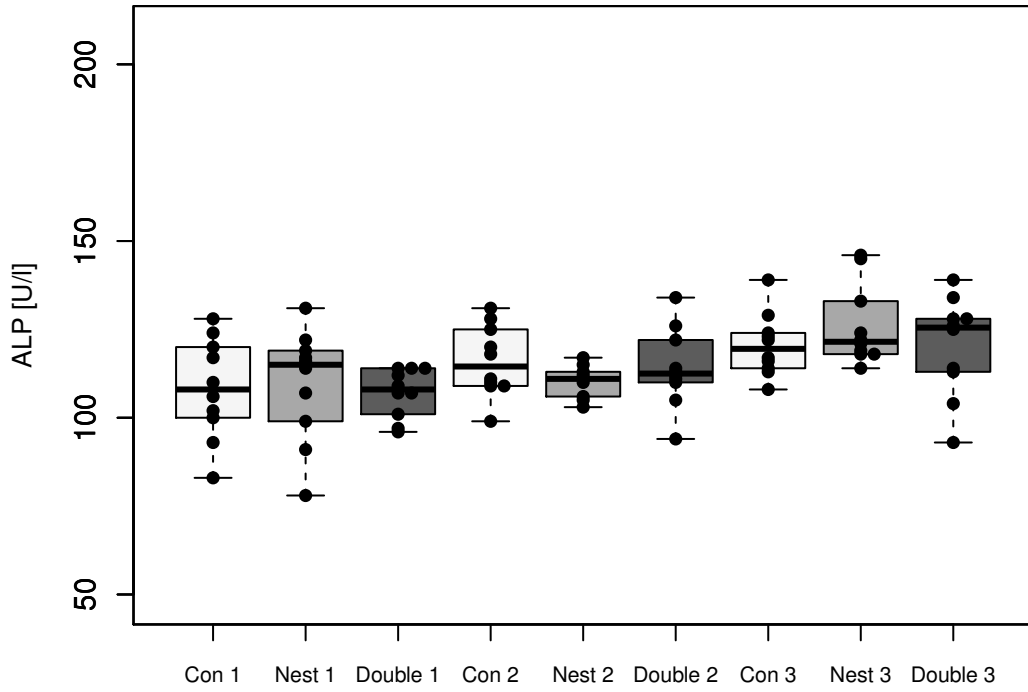**D2 female**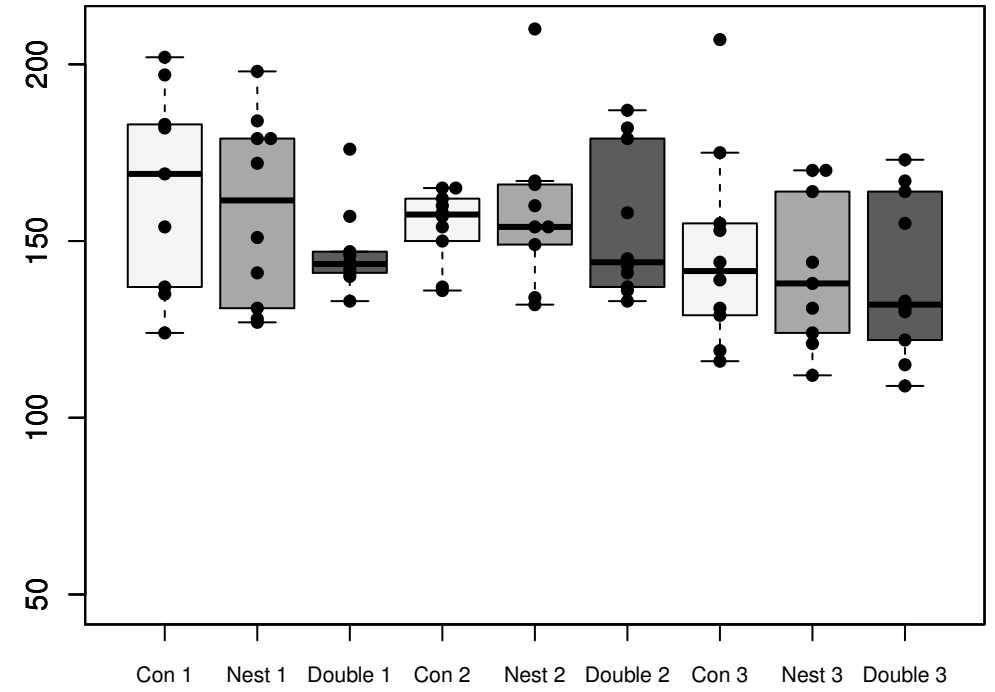**B6 male**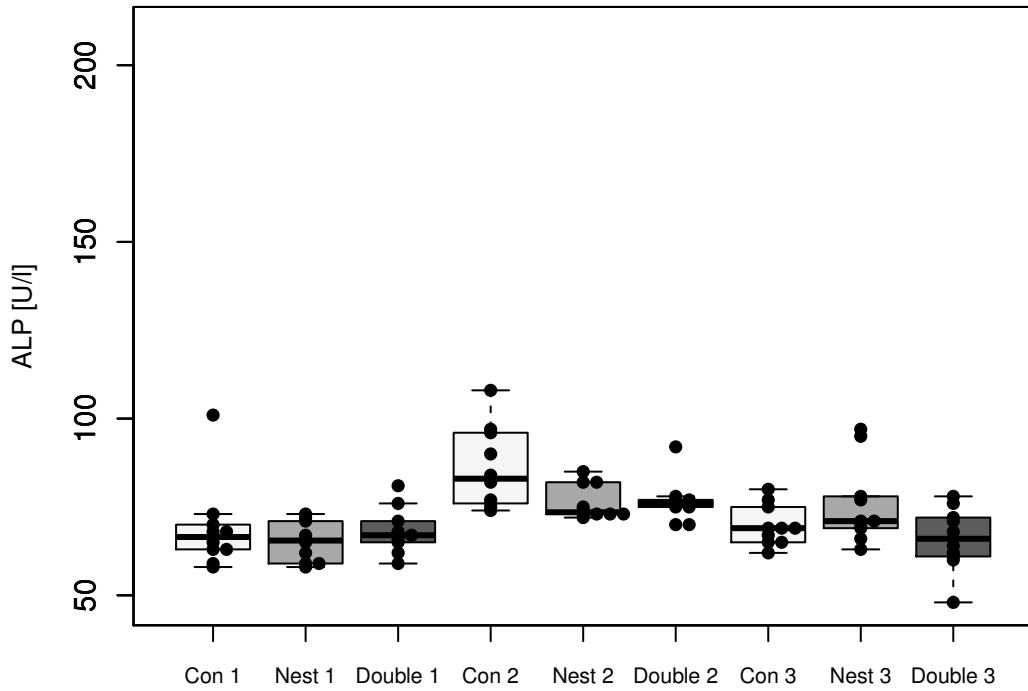**D2 male**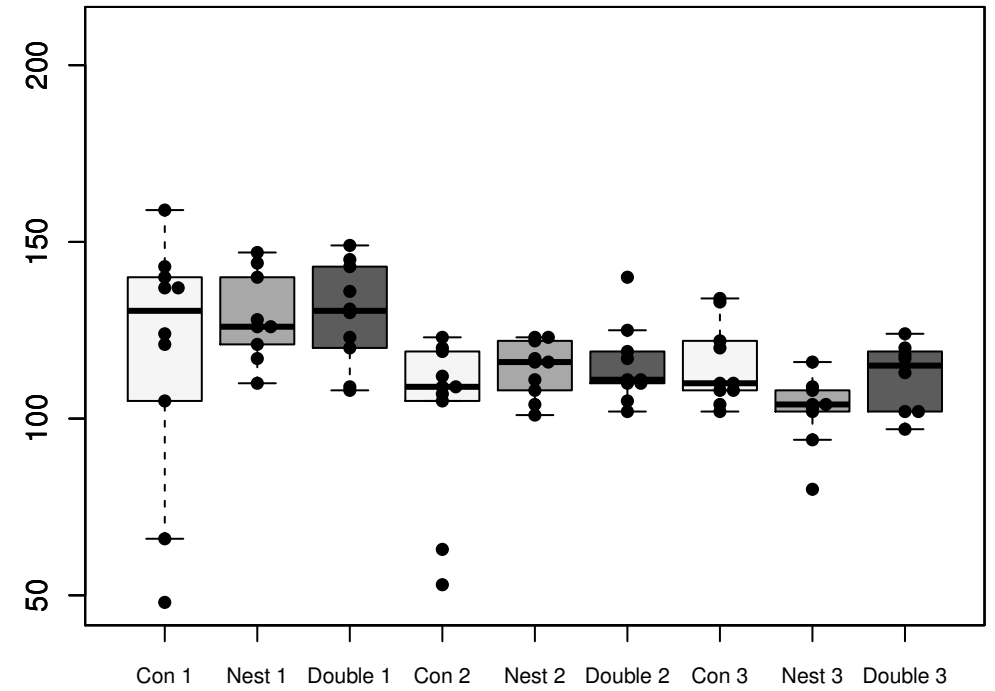

**B6 female**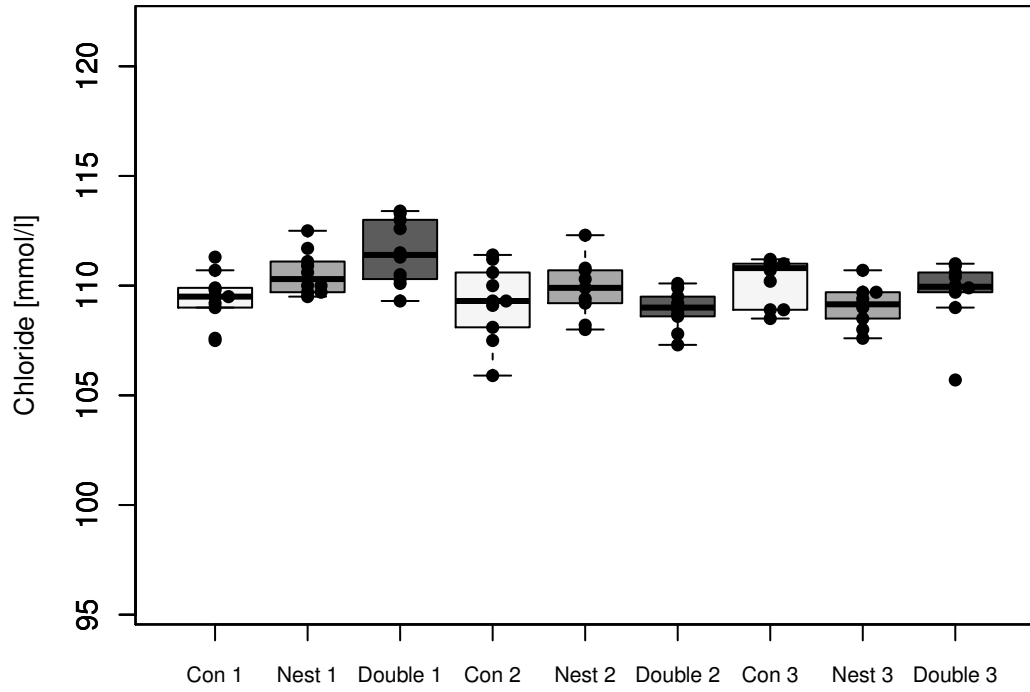**D2 female**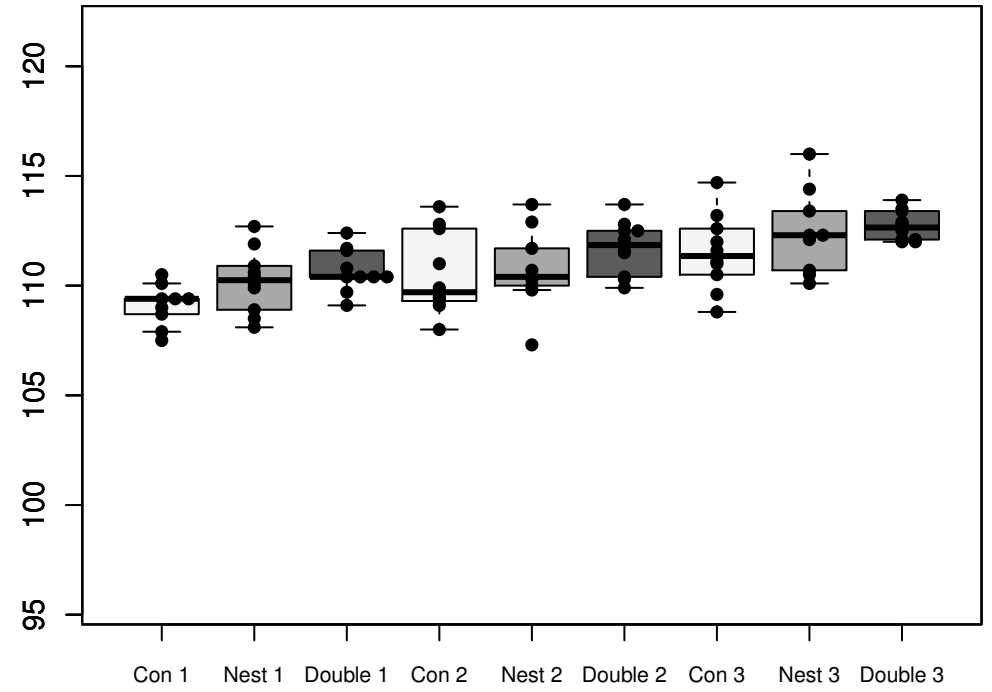**B6 male**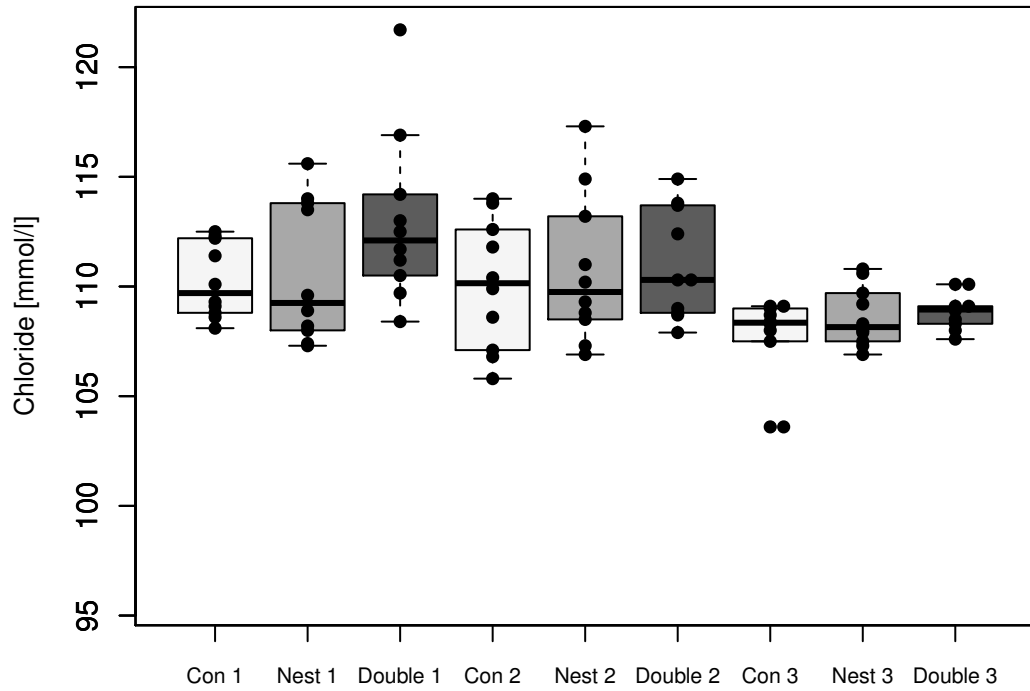**D2 male**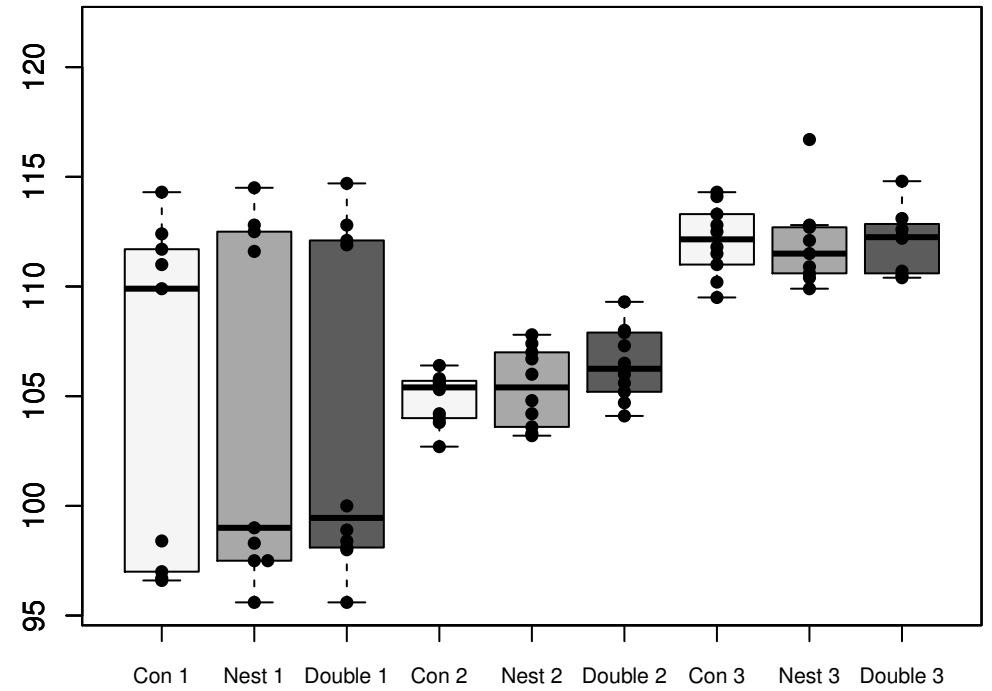

**B6 female**

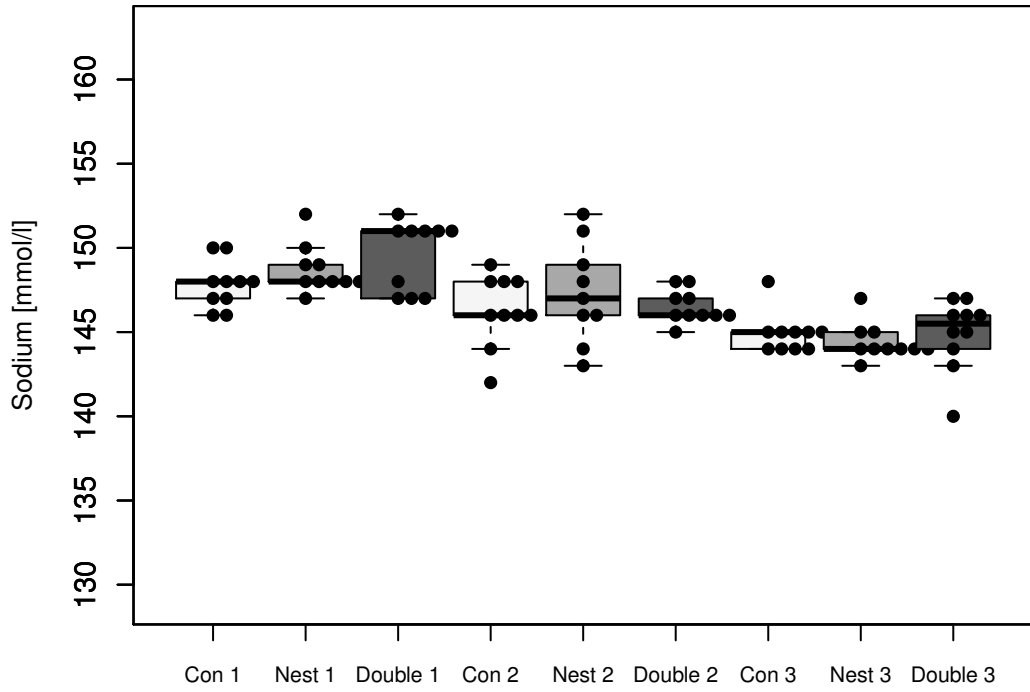

**D2 female**

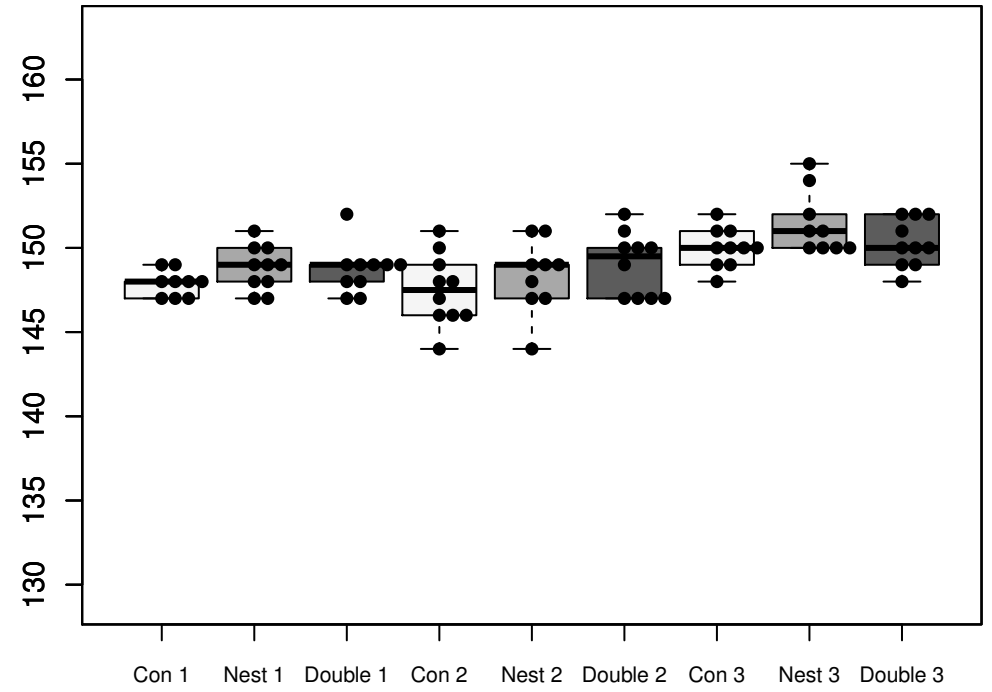

**B6 male**

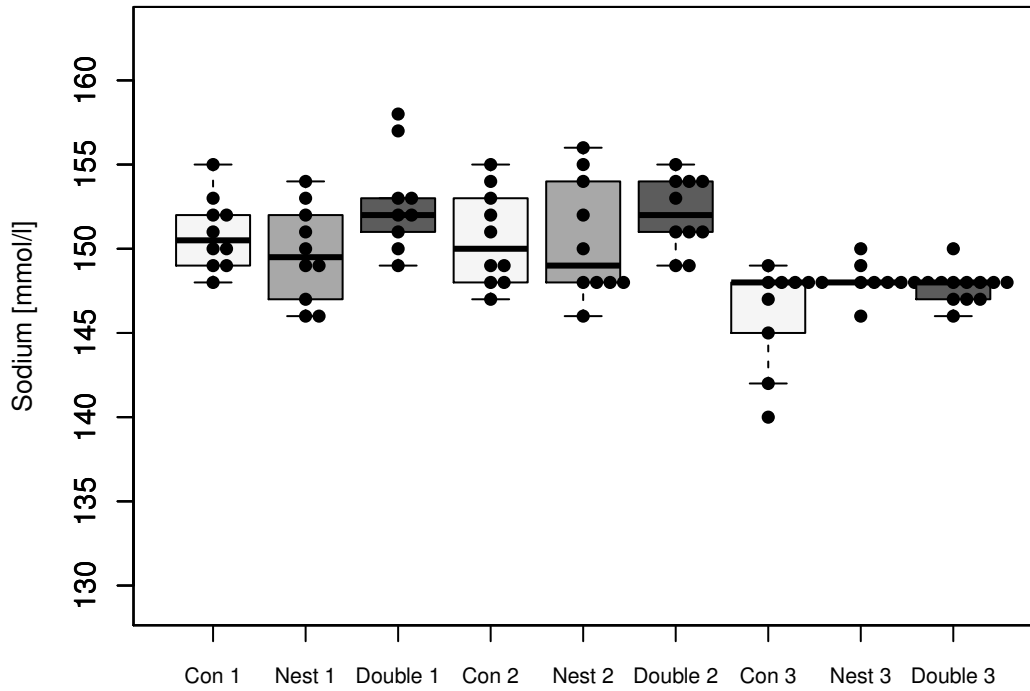

**D2 male**

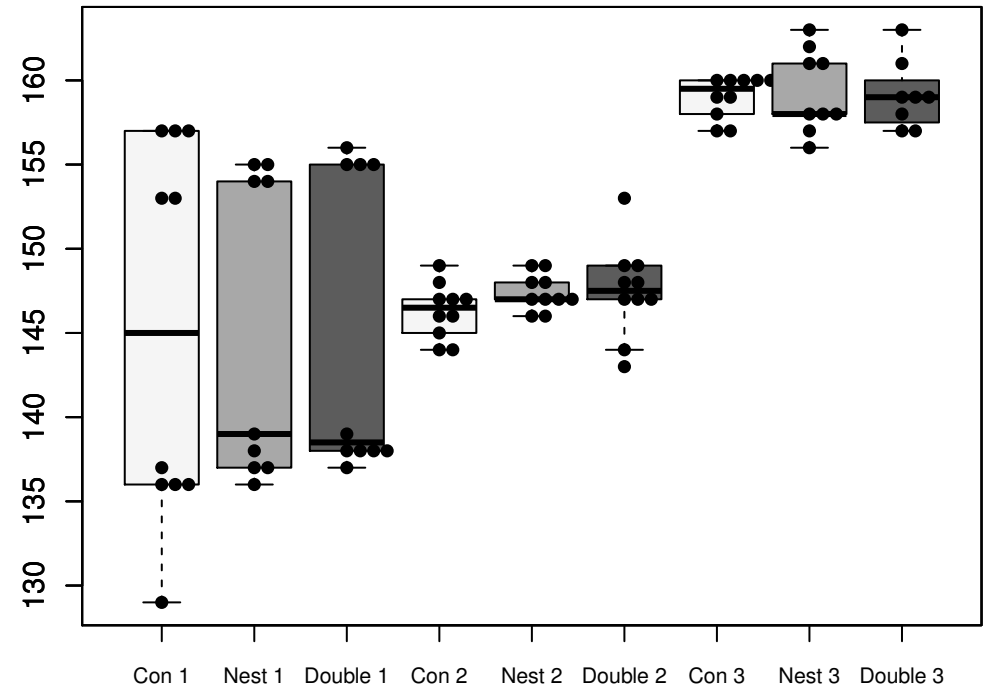

**B6 female**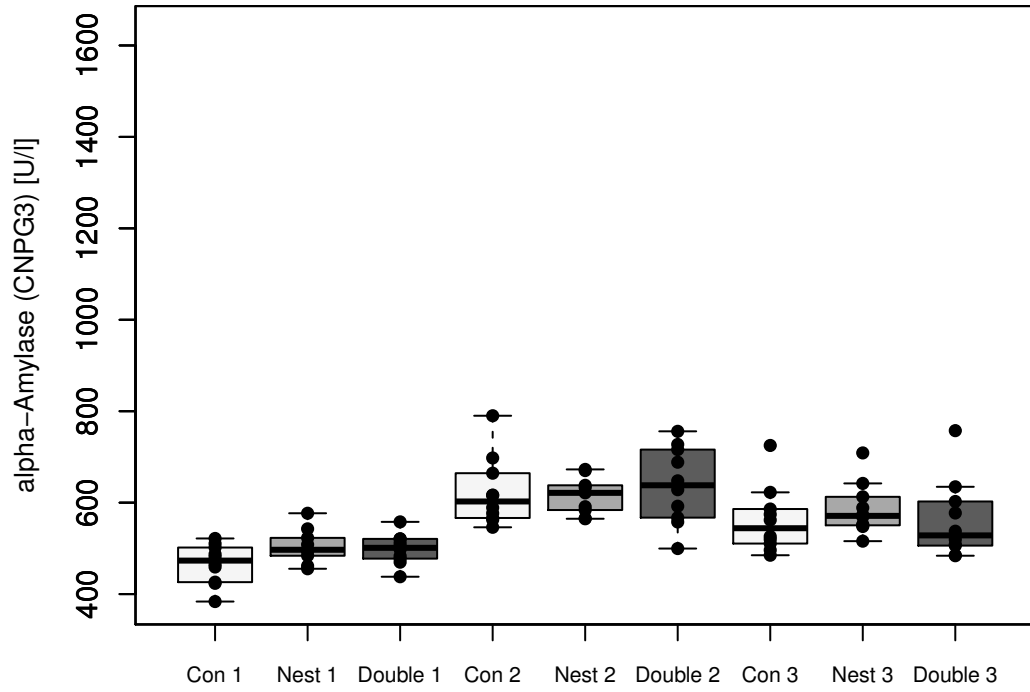**D2 female**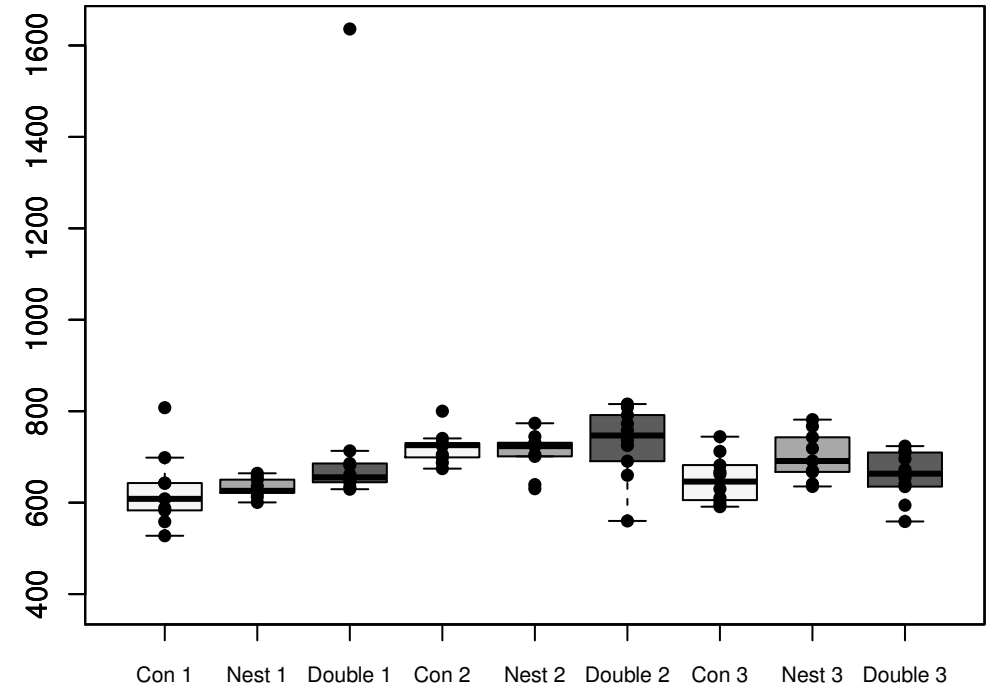**B6 male**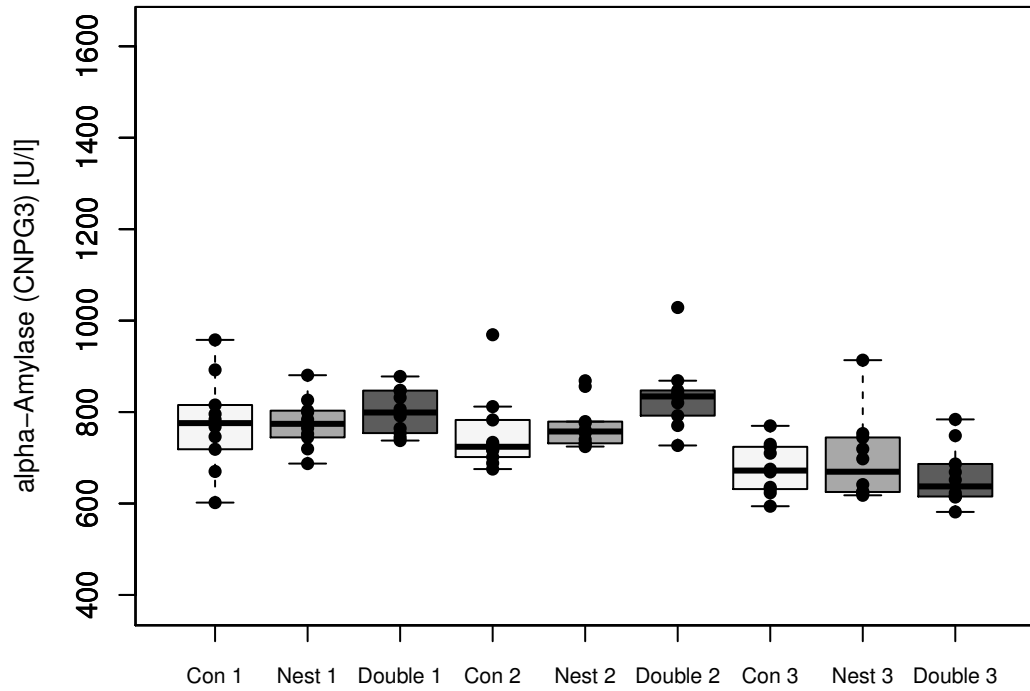**D2 male**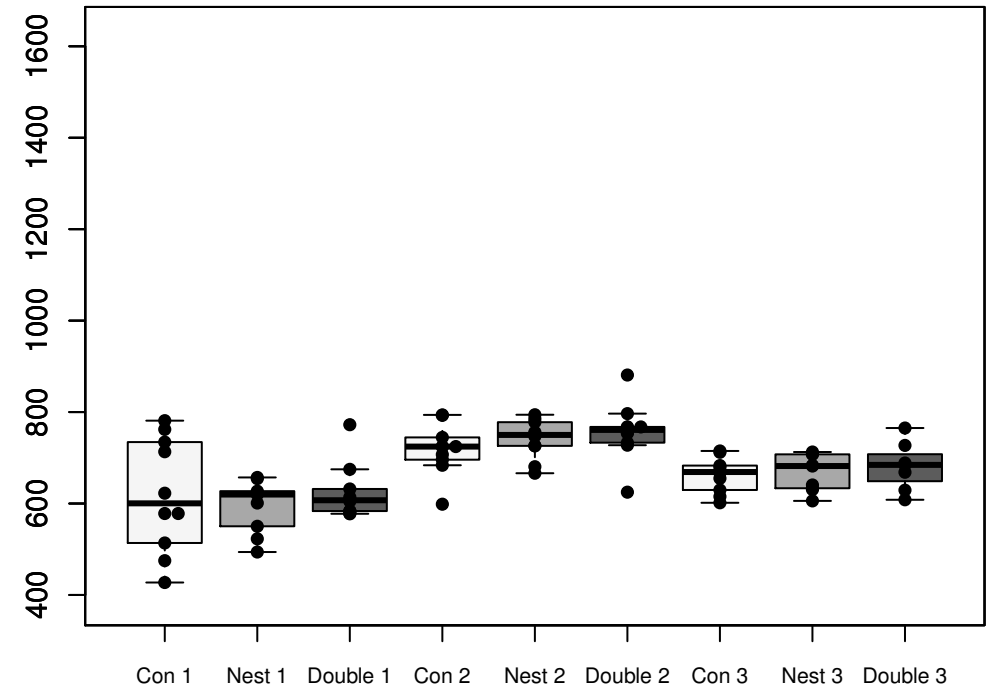

**B6 female**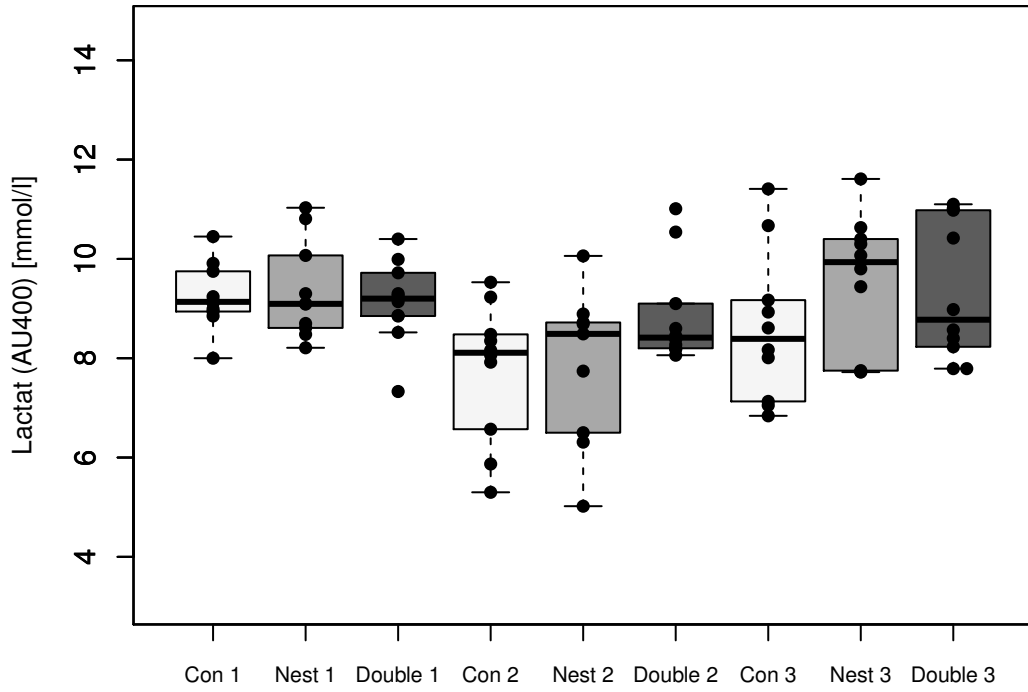**D2 female**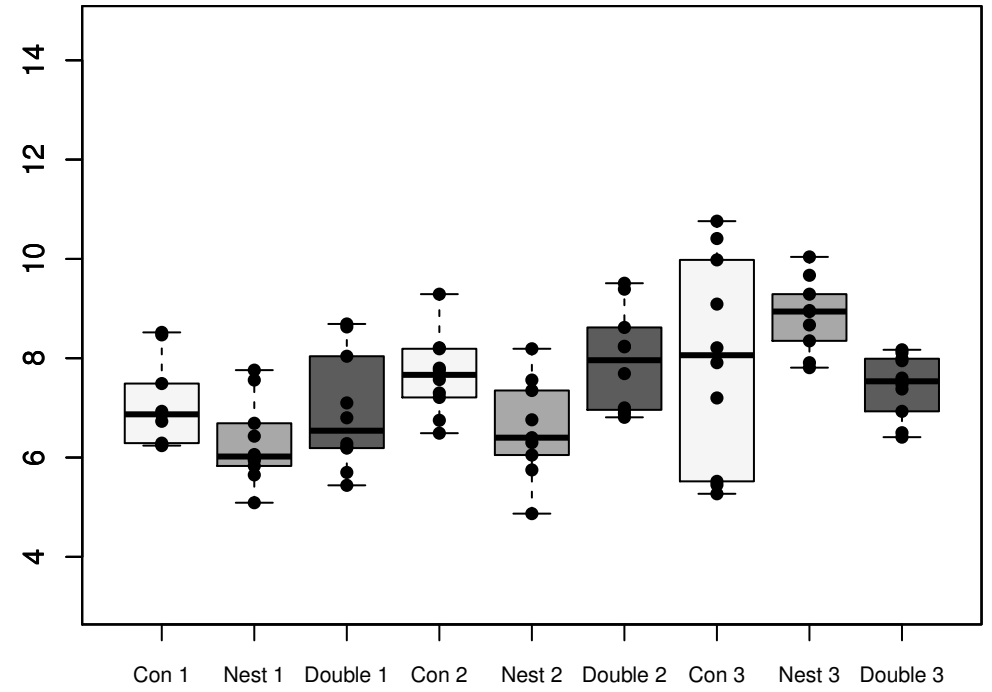**B6 male**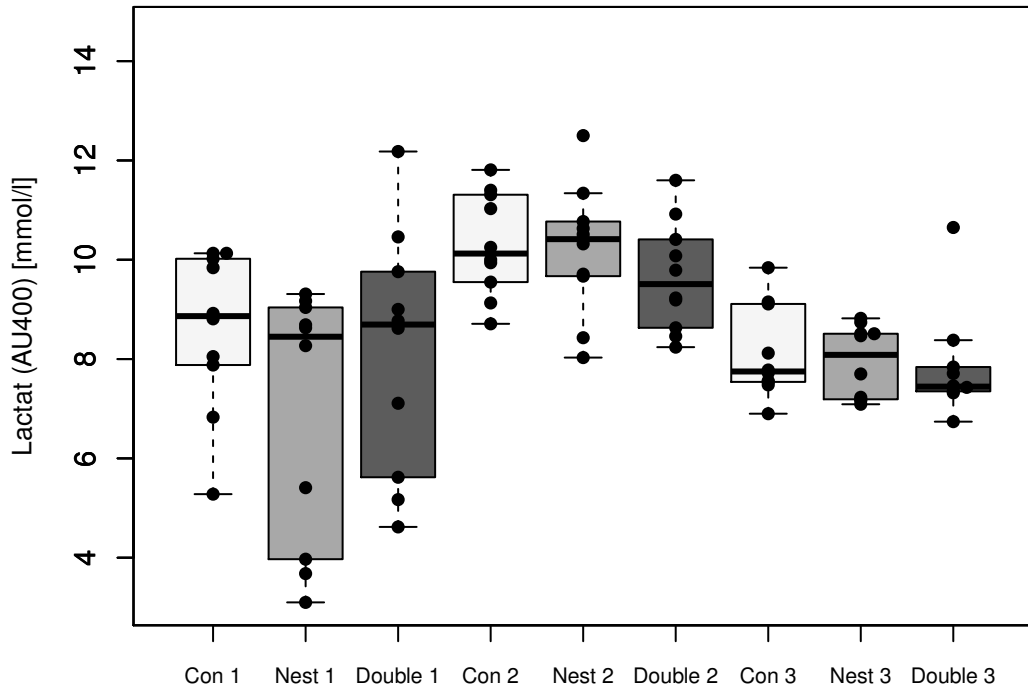**D2 male**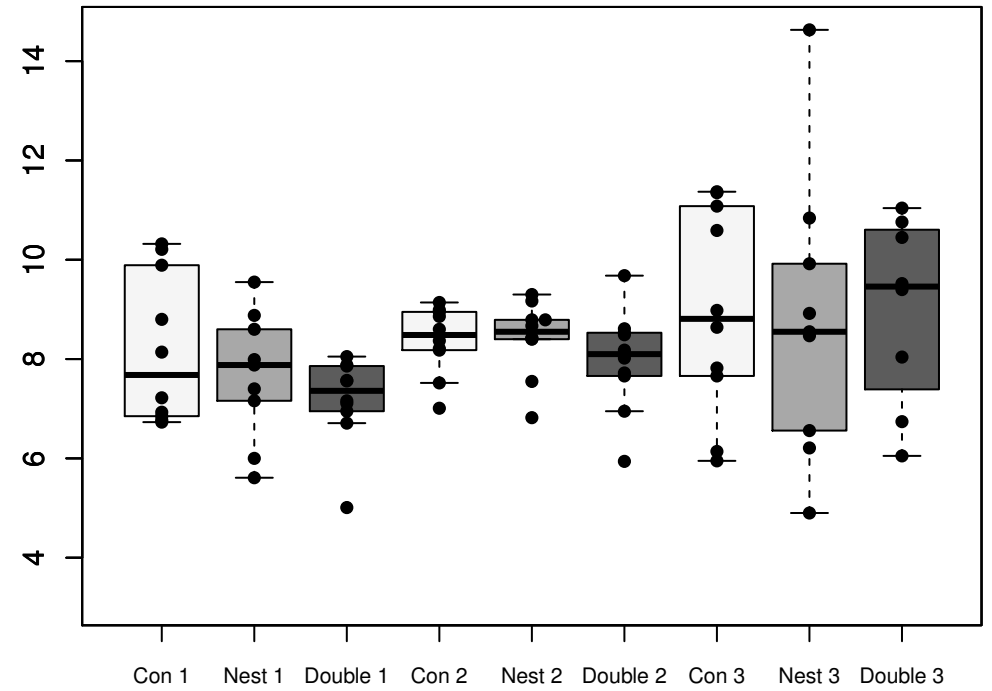

**B6 female**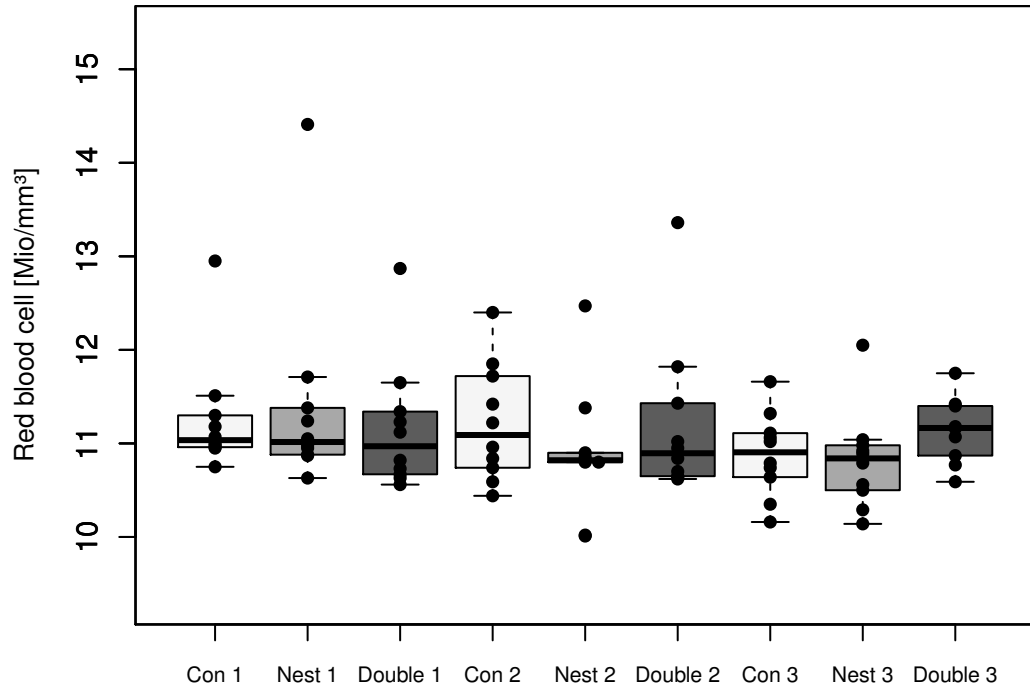**D2 female**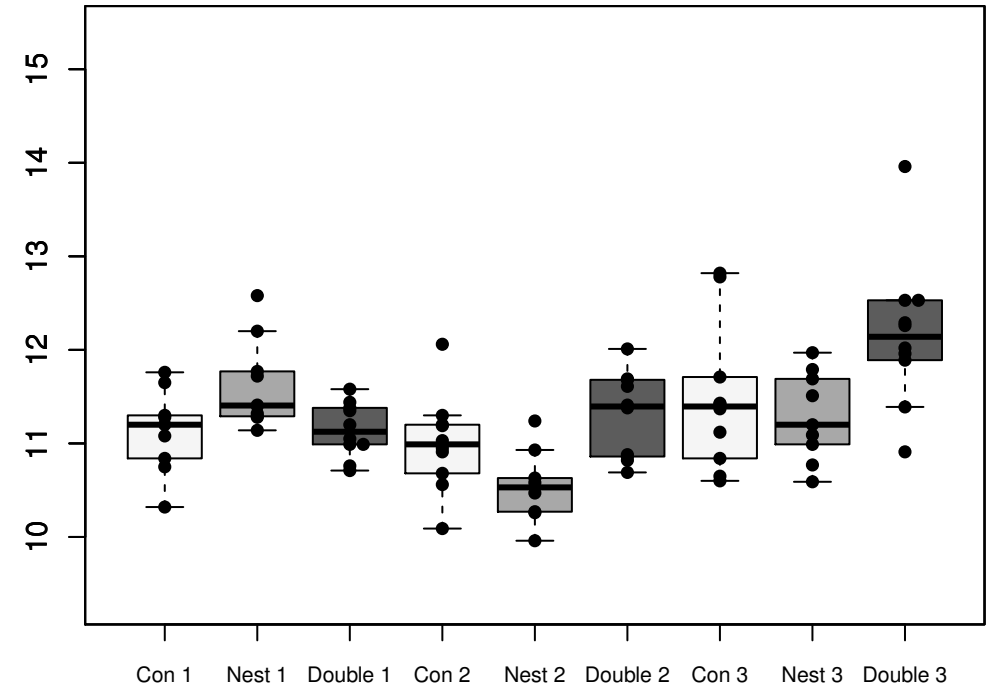**B6 male**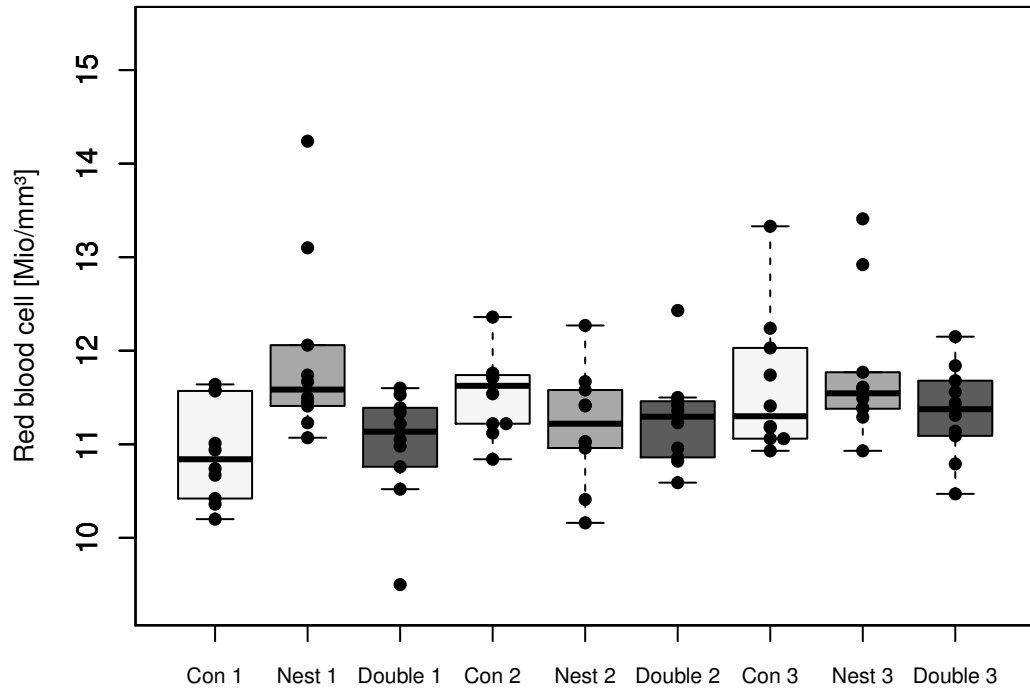**D2 male**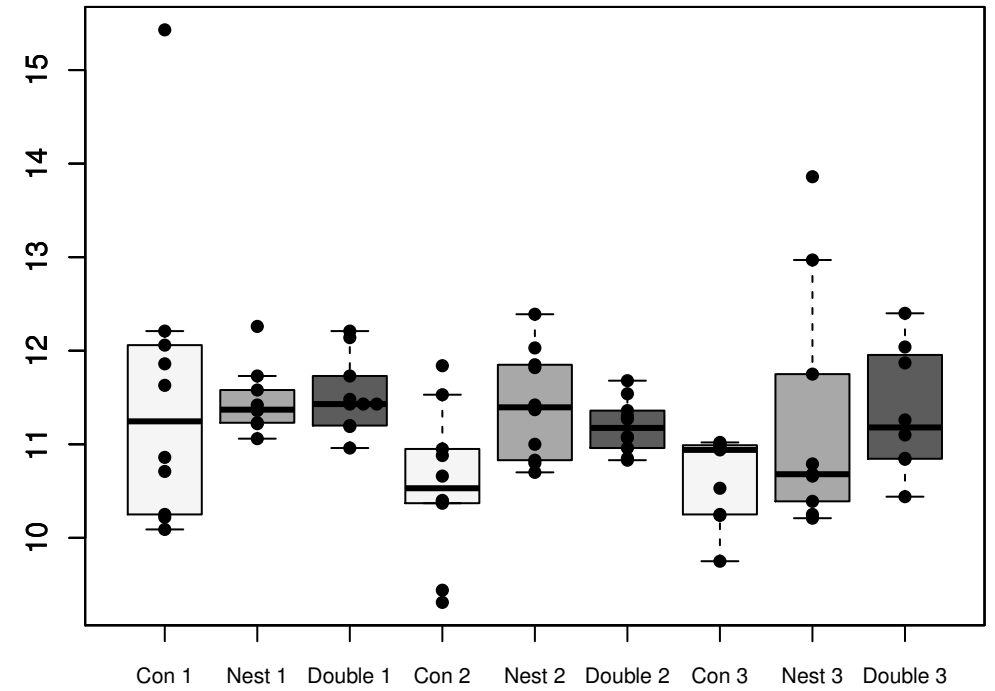



**B6 female**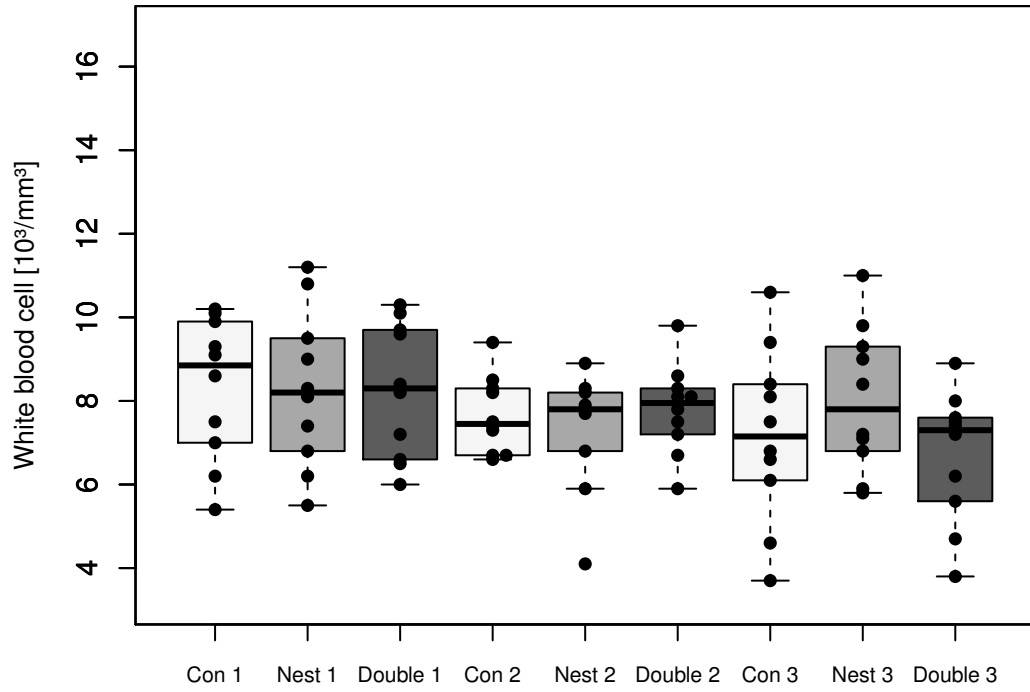**D2 female**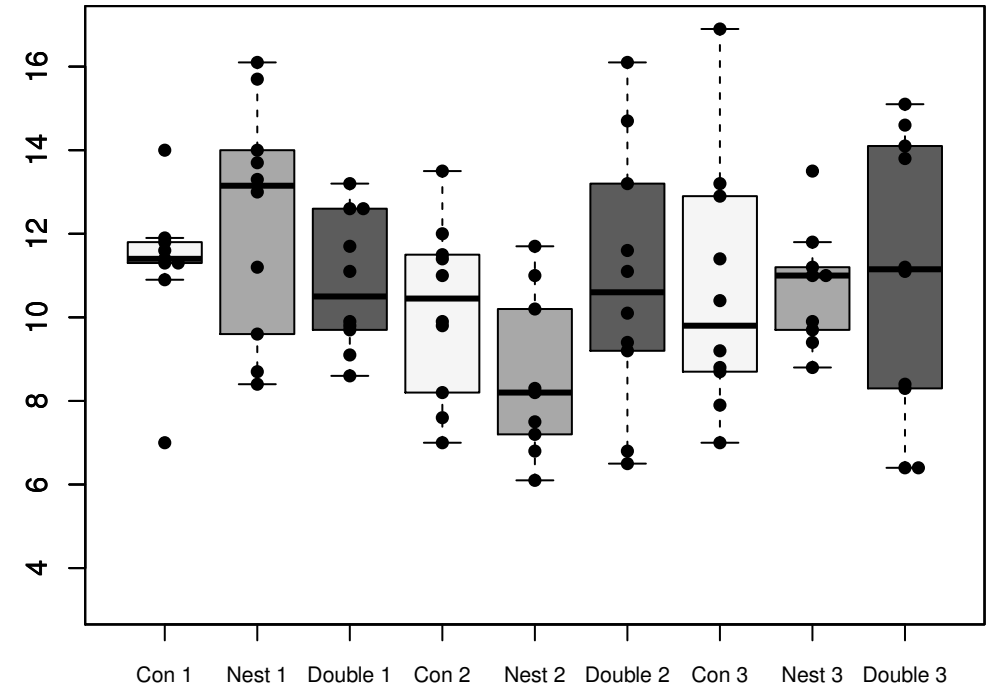**B6 male**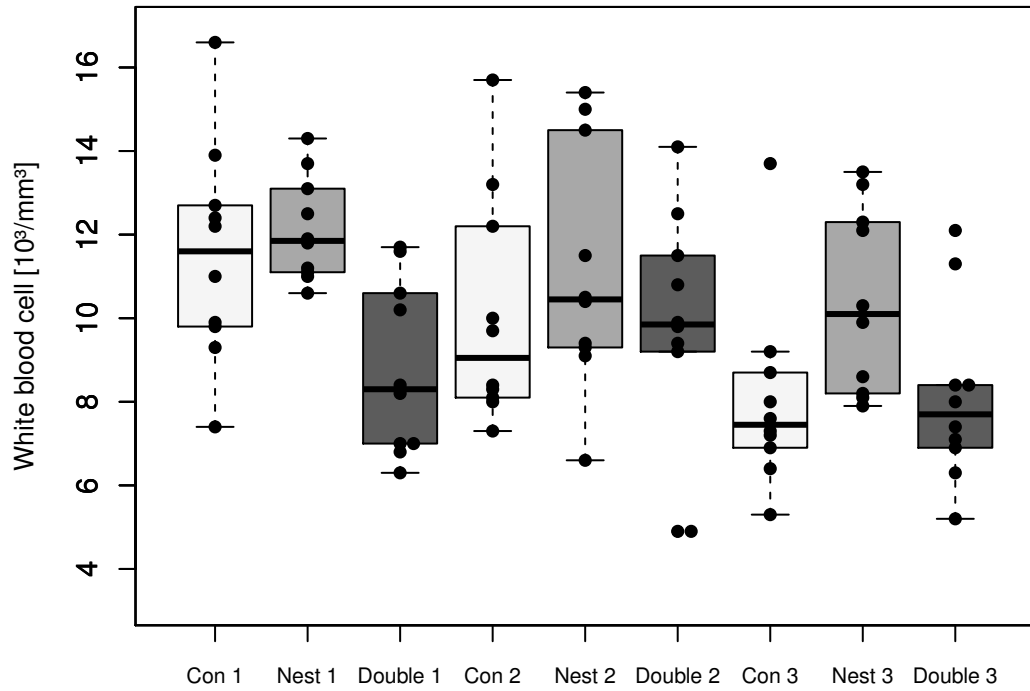**D2 male**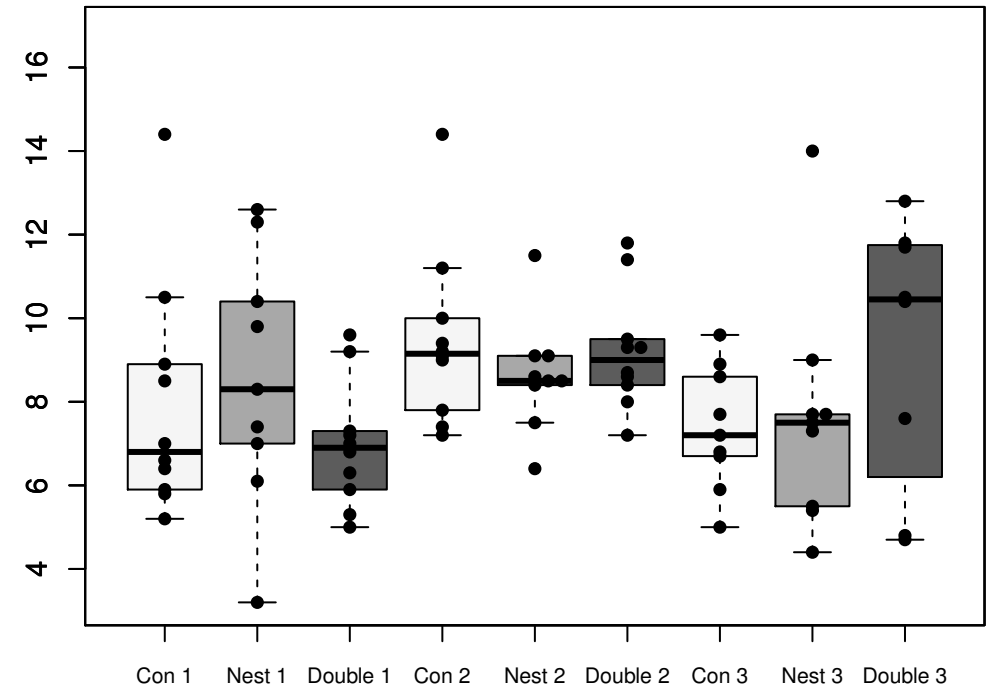

**B6 female**

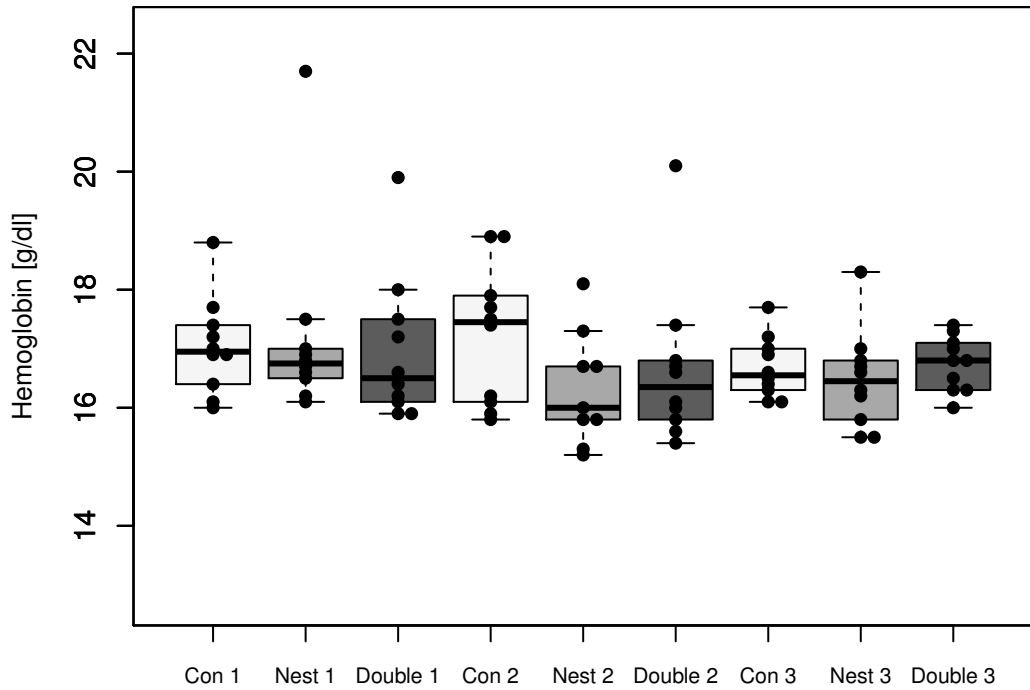

**D2 female**

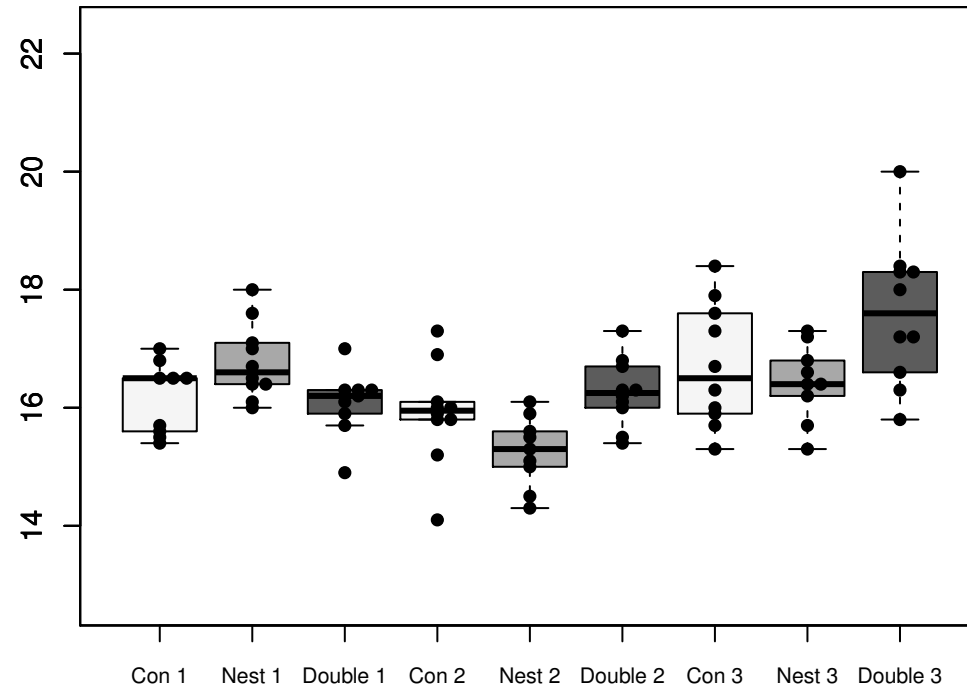

**B6 male**

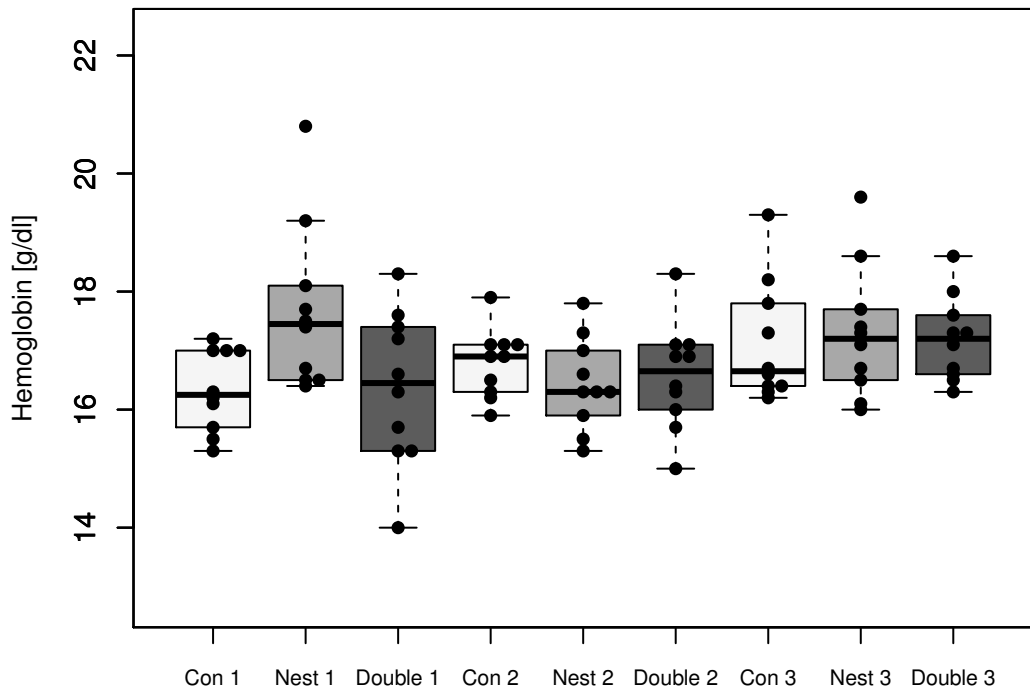

**D2 male**

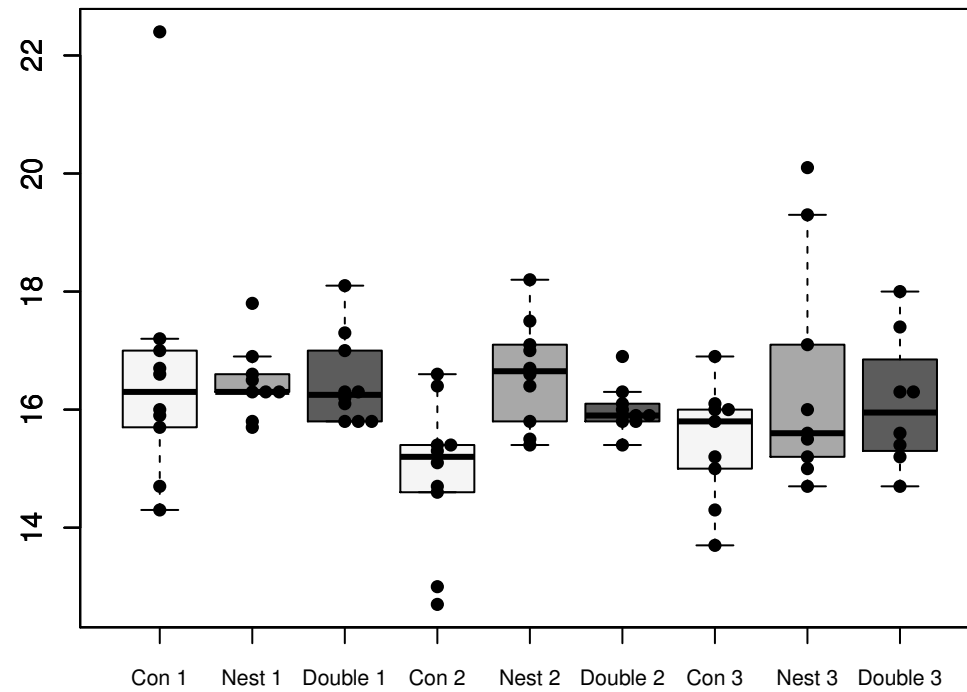

**B6 female**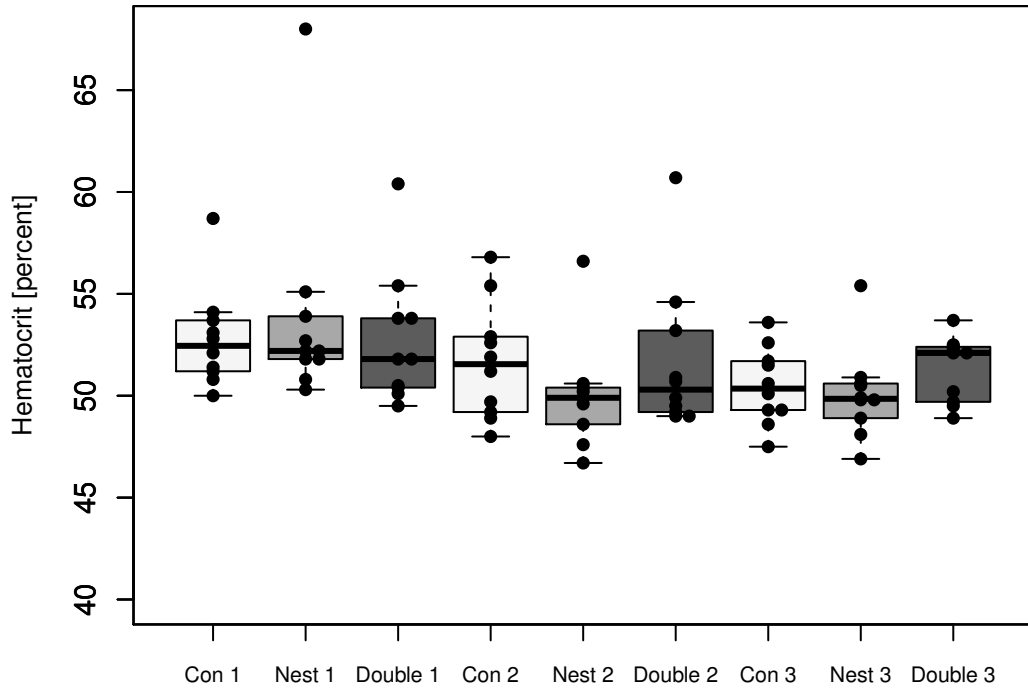**D2 female**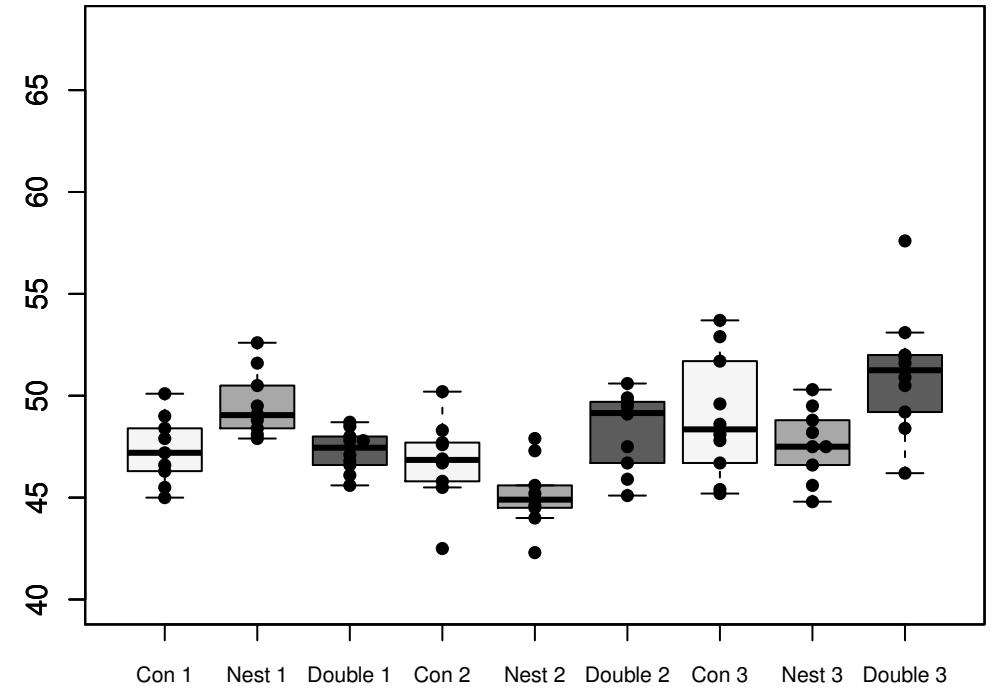**B6 male**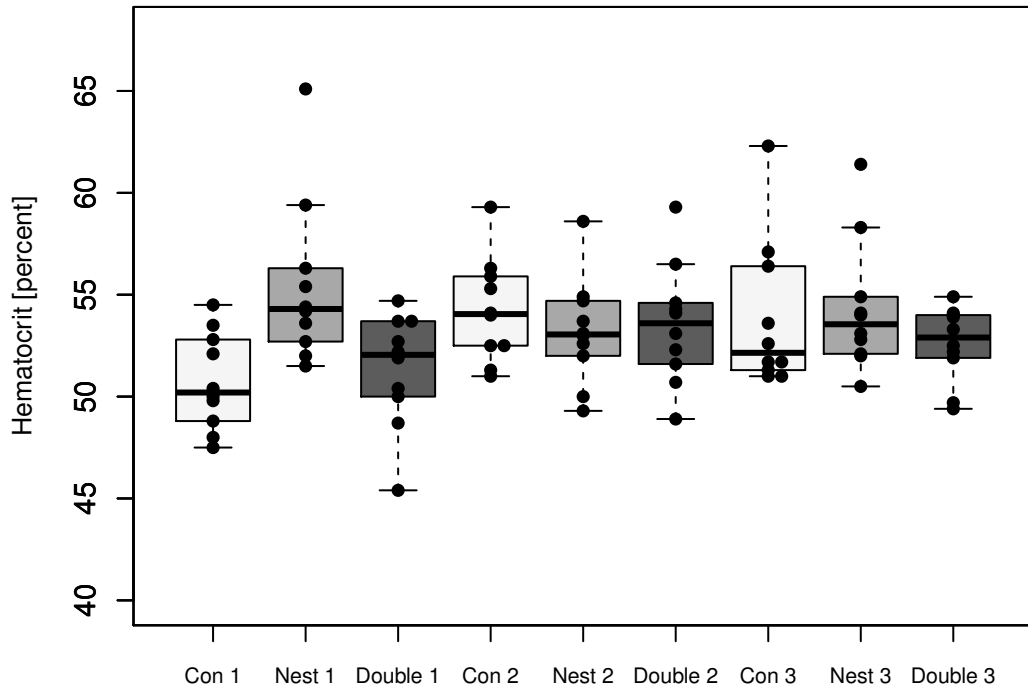**D2 male**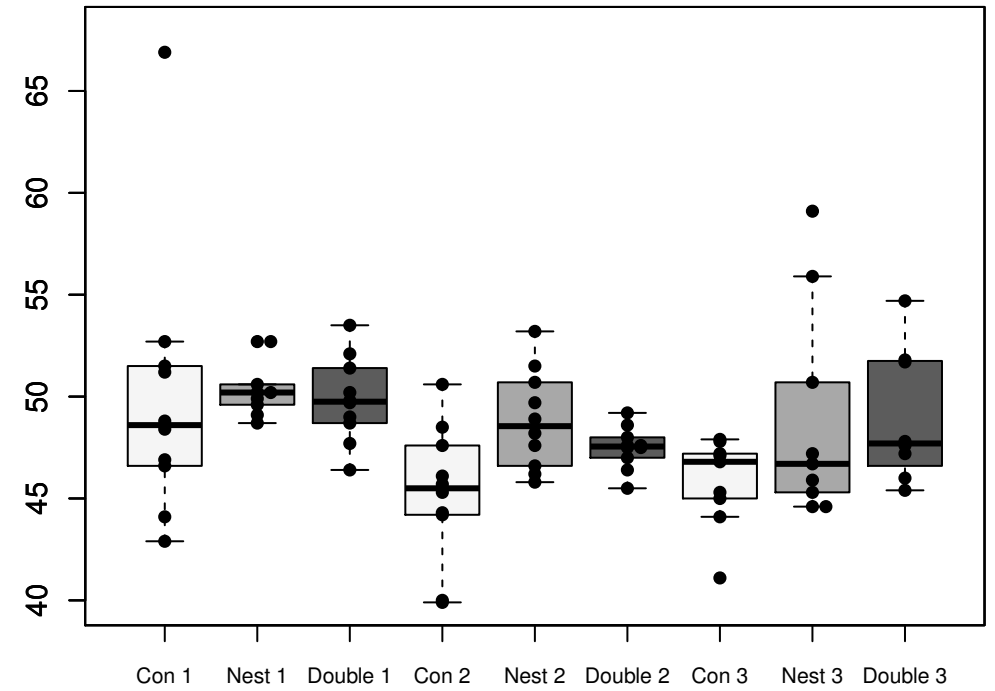

**B6 female**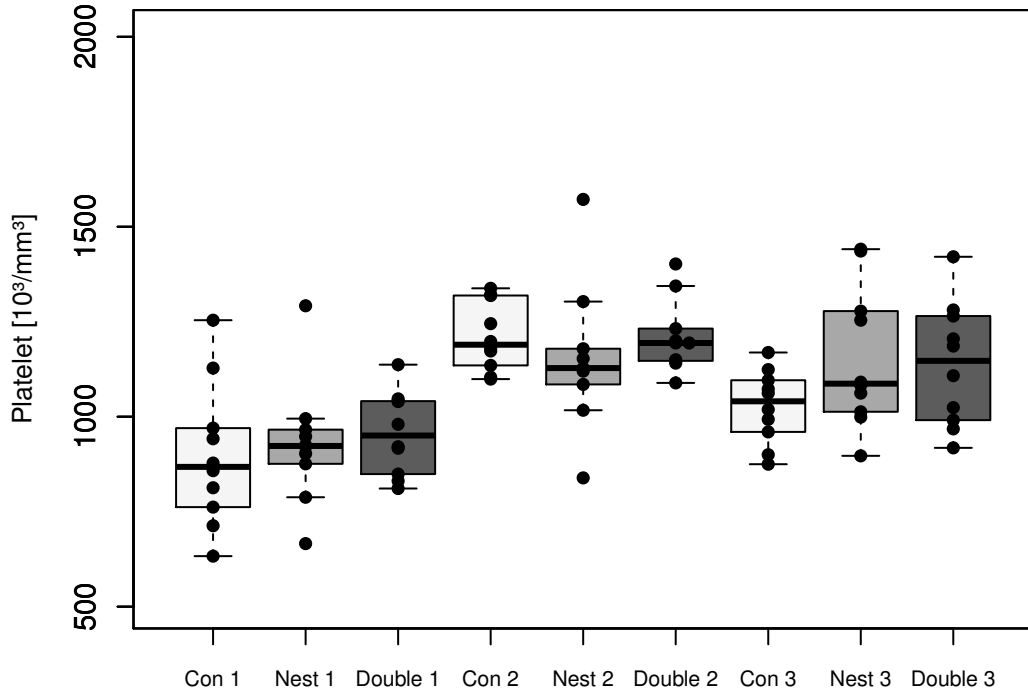**D2 female**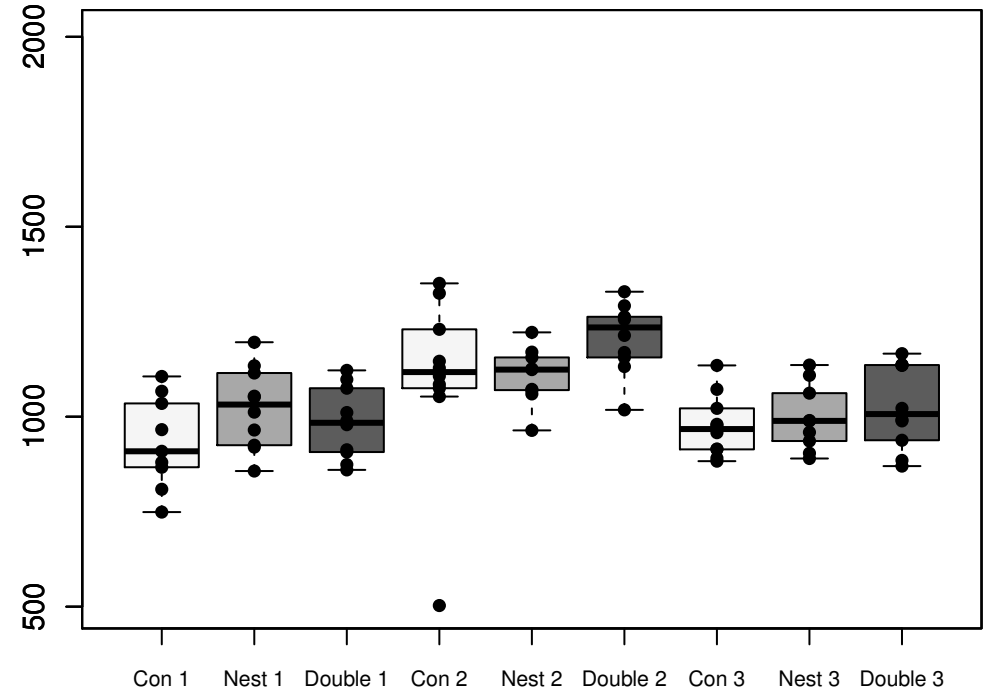**B6 male**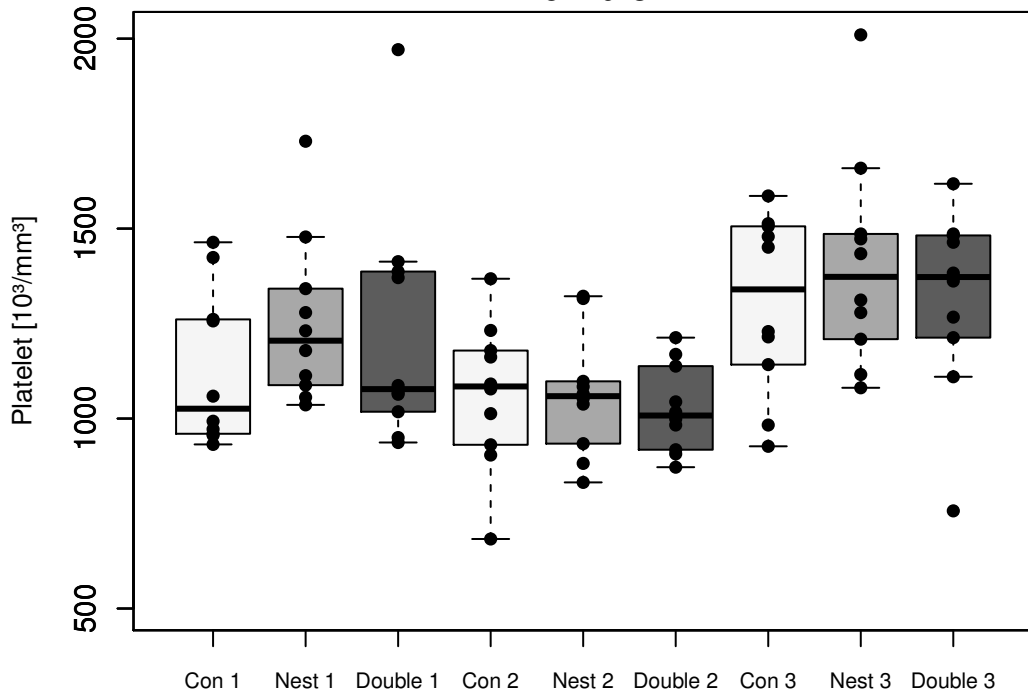**D2 male**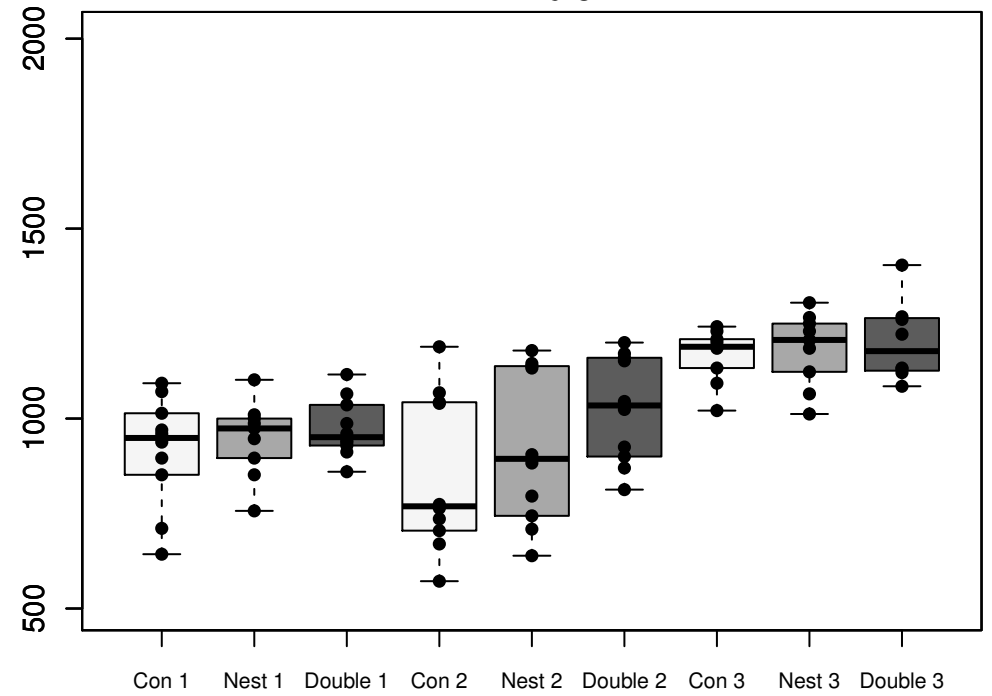

**B6 female**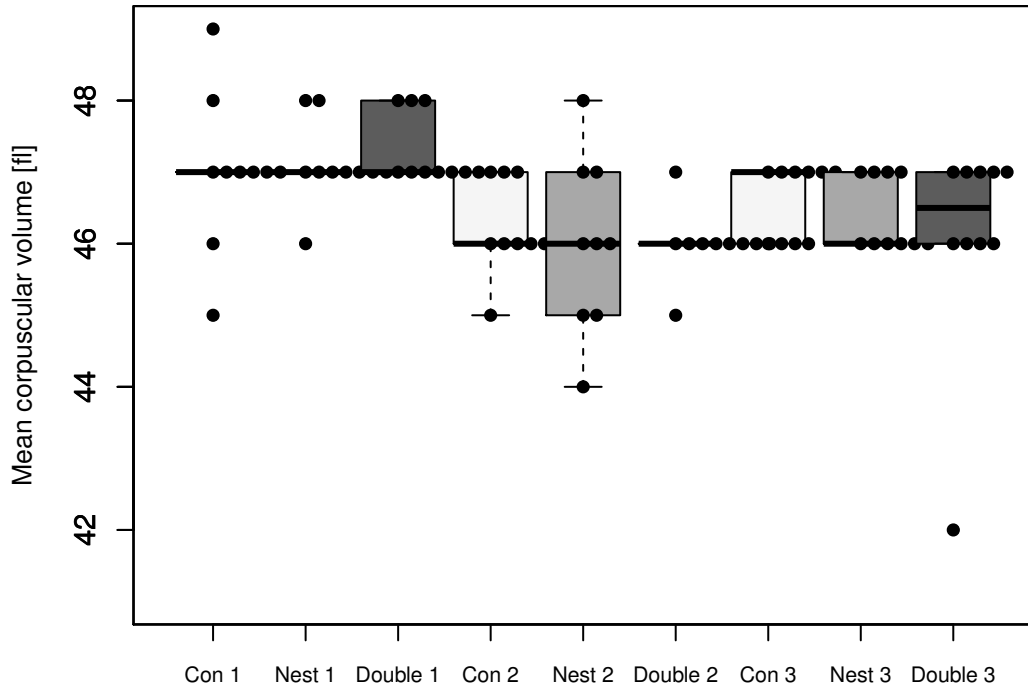**D2 female**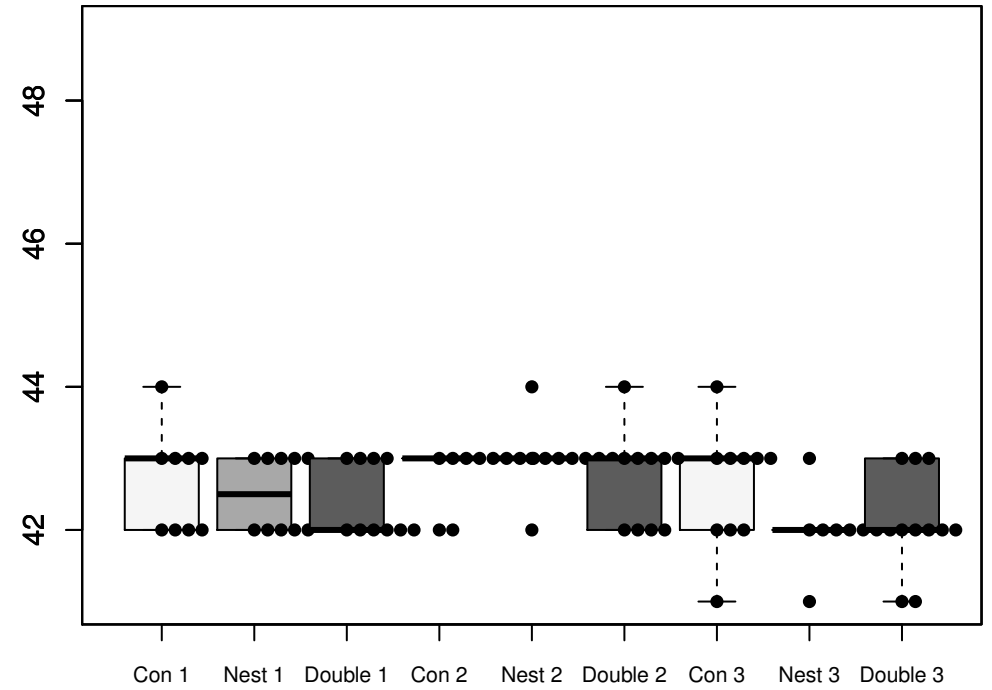**B6 male**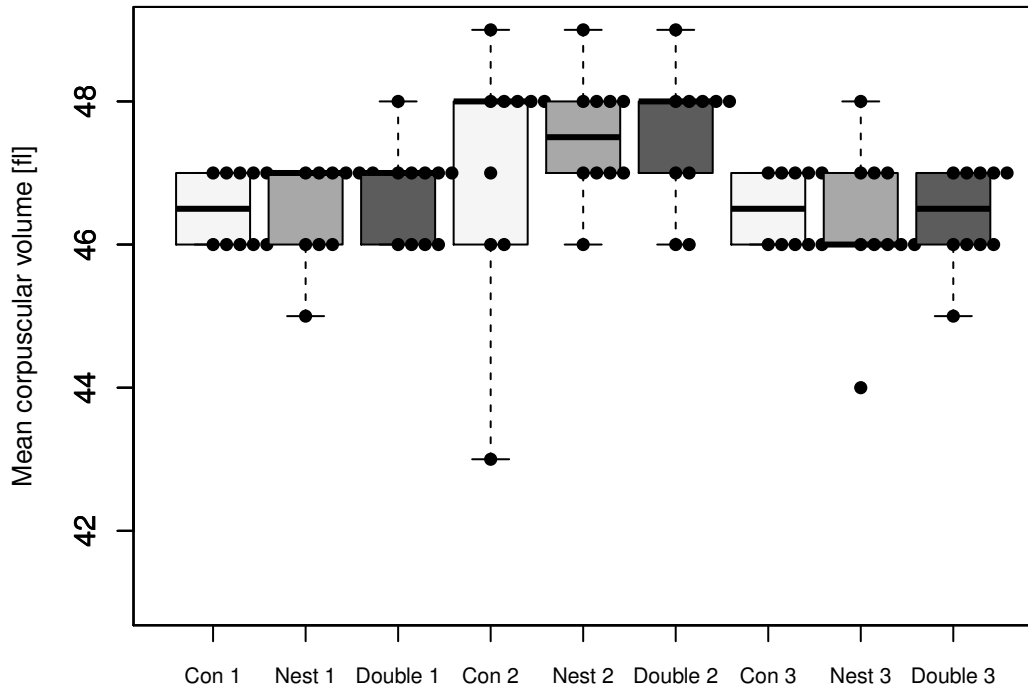**D2 male**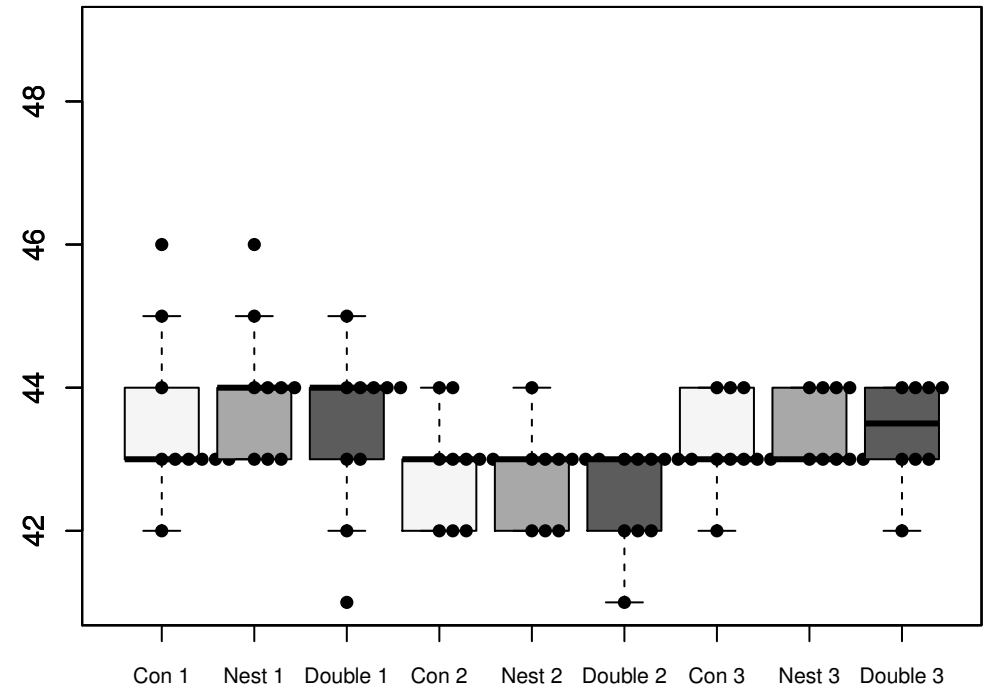

**B6 female**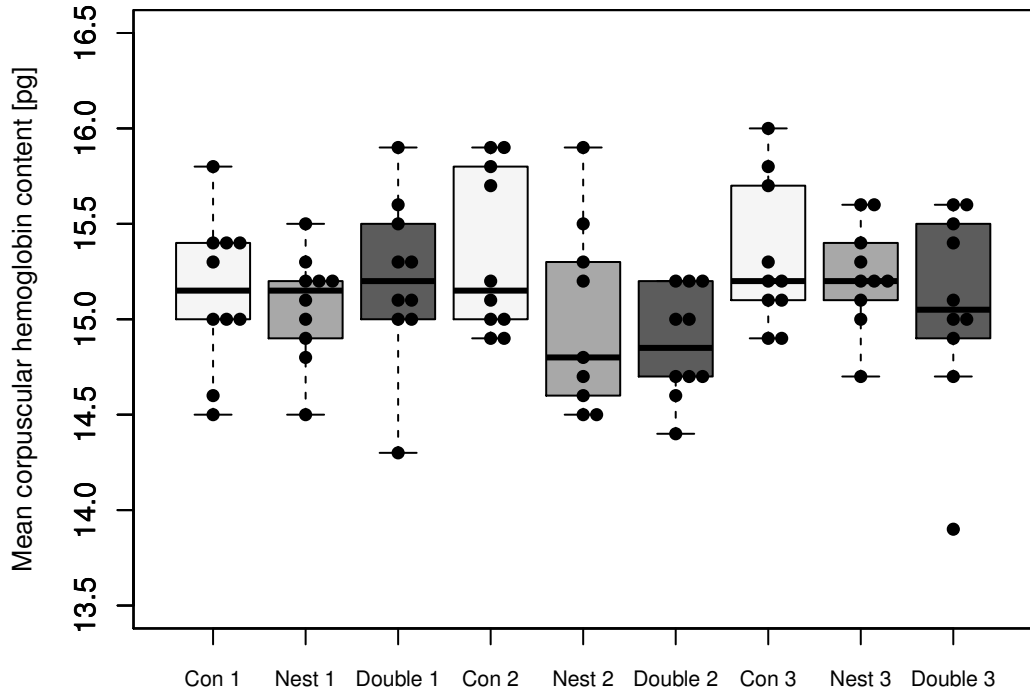**D2 female**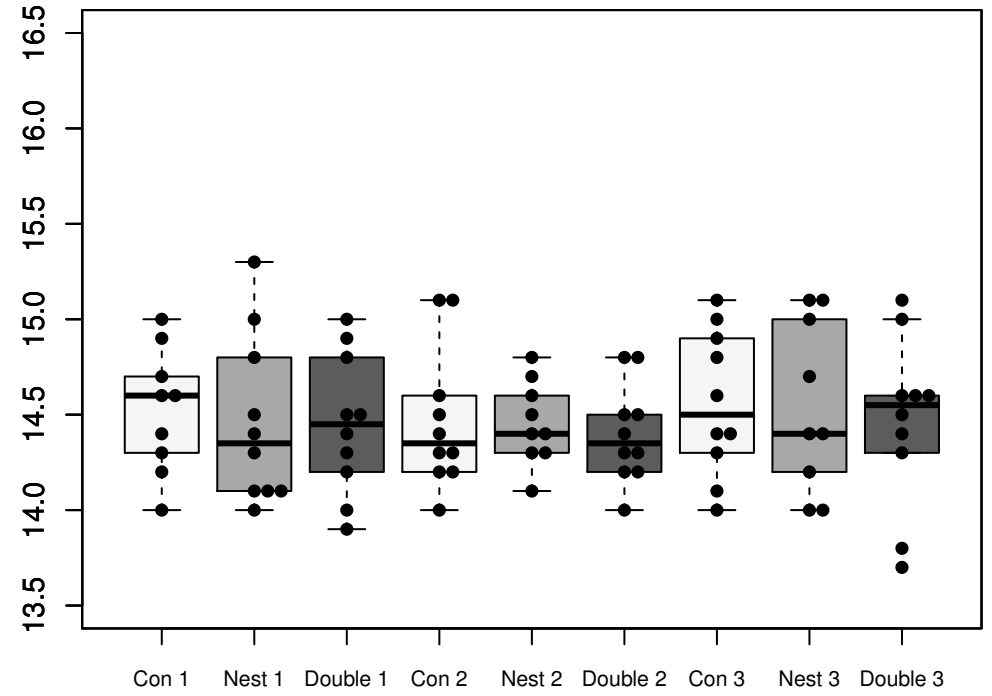**B6 male**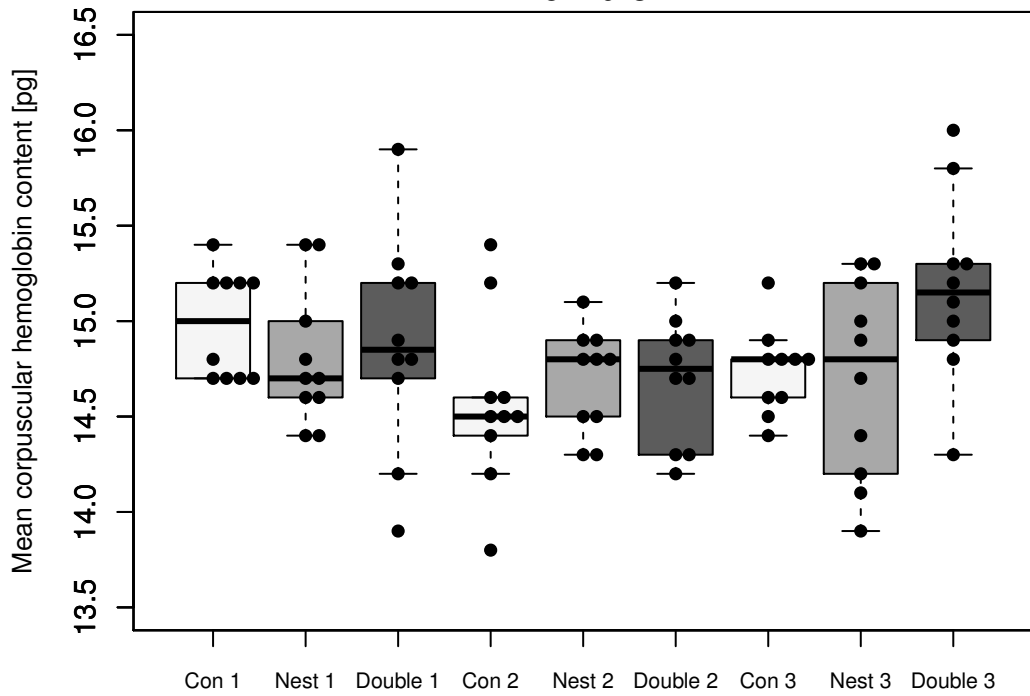**D2 male**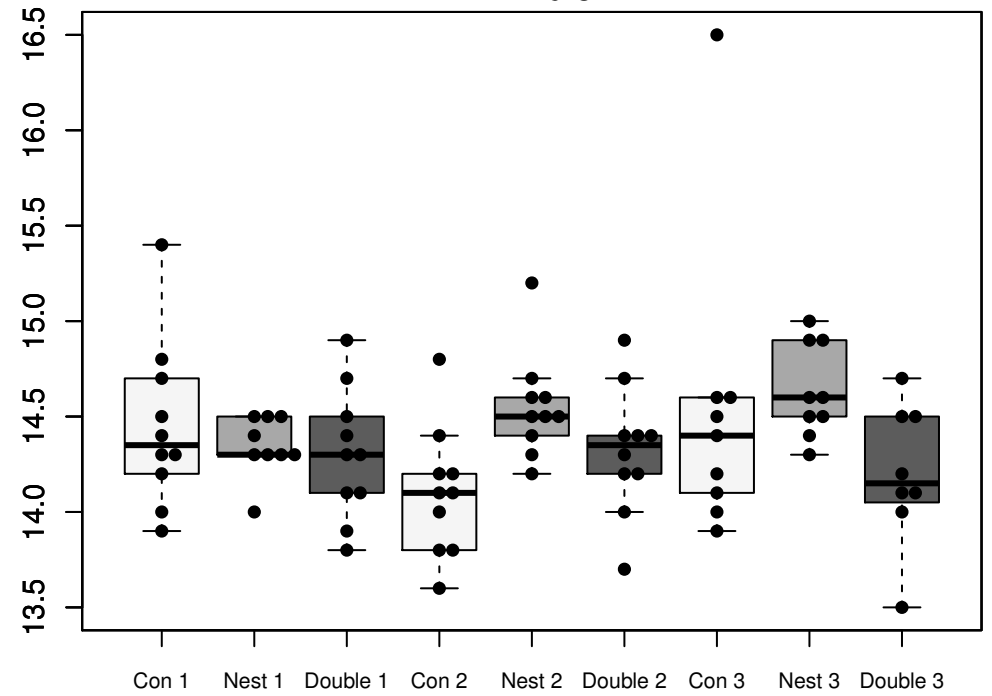

**B6 female**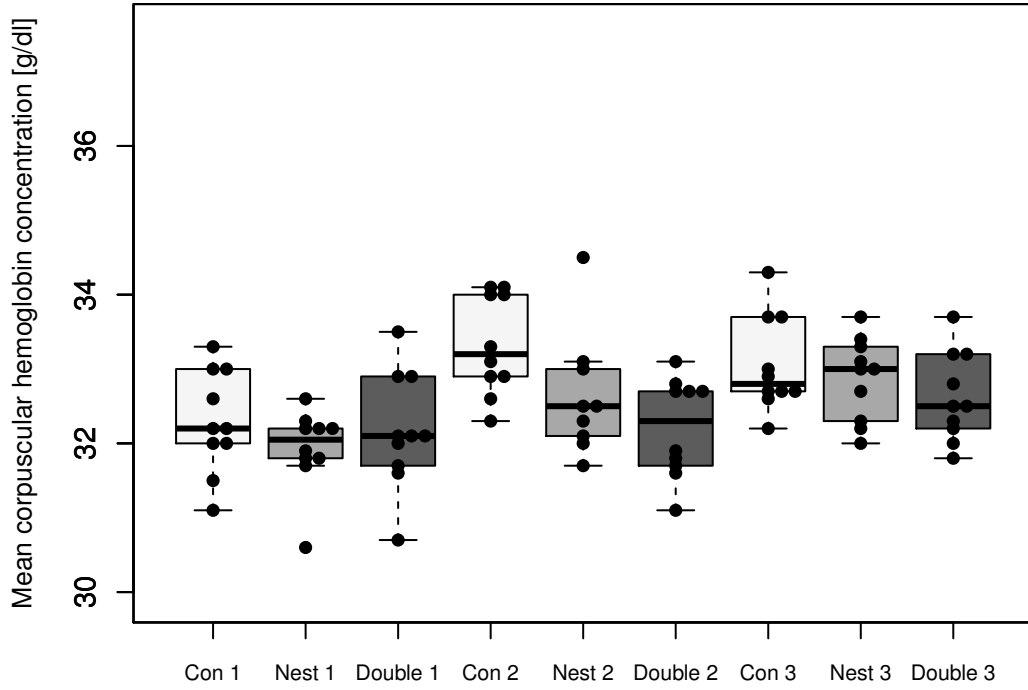**D2 female**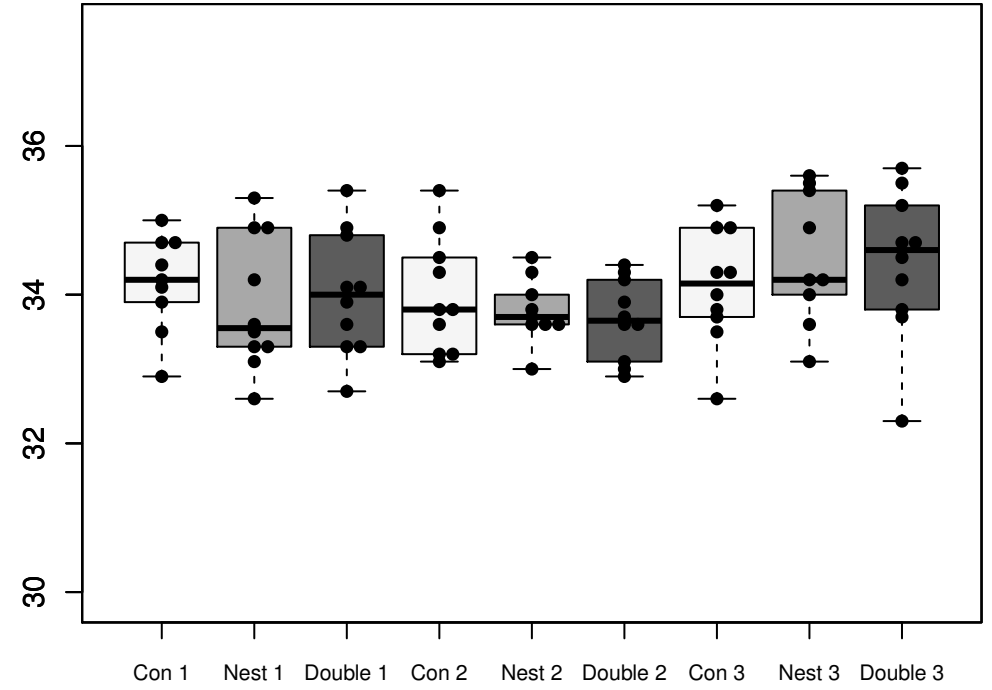**B6 male**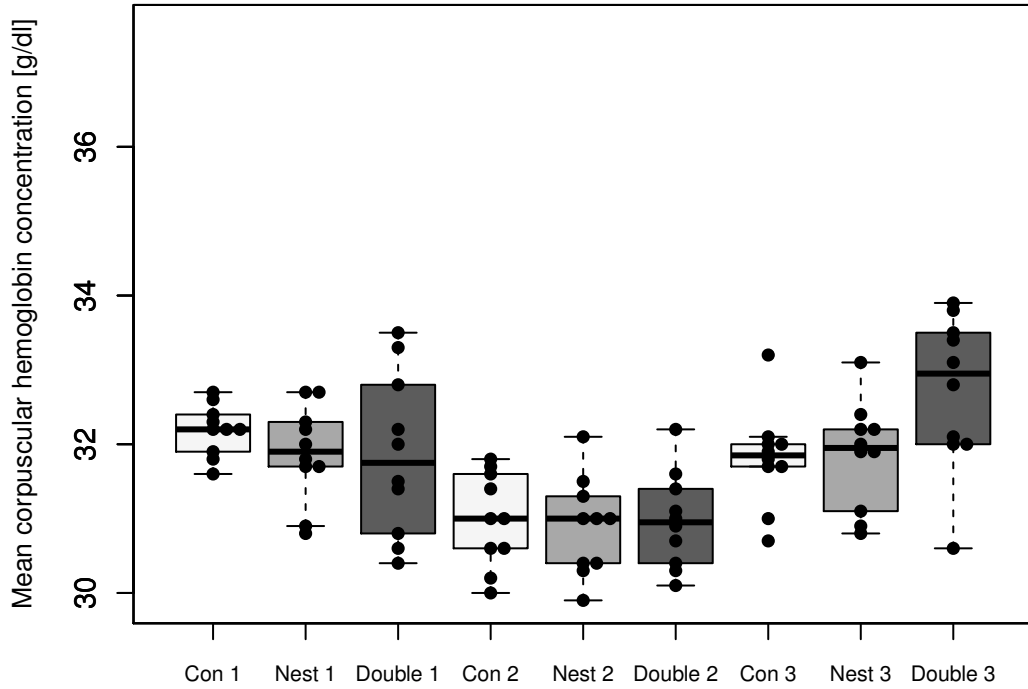**D2 male**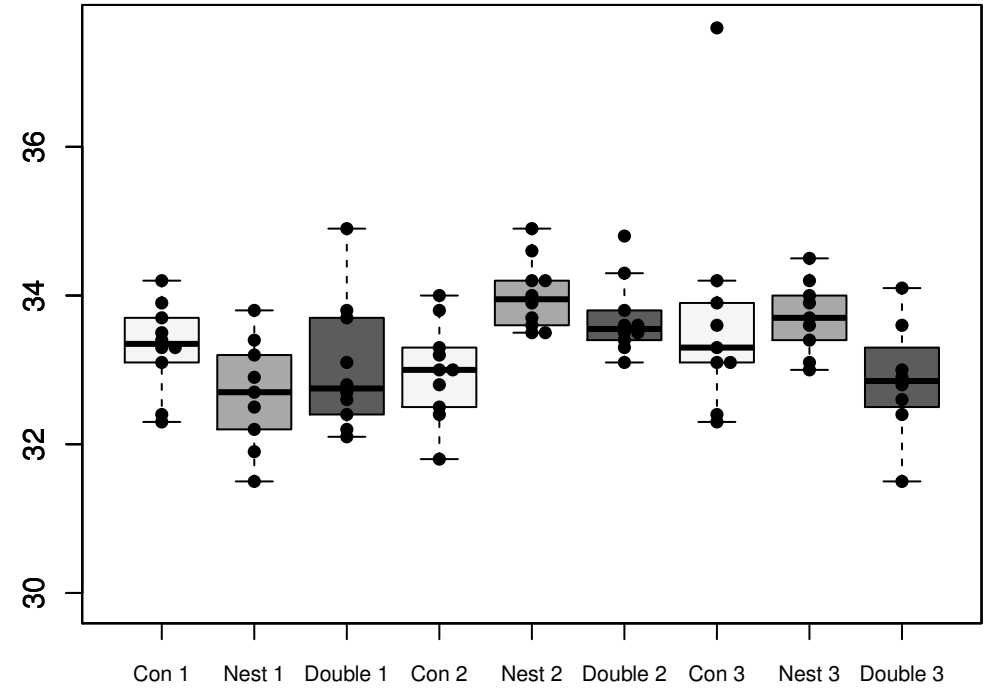

**B6 female**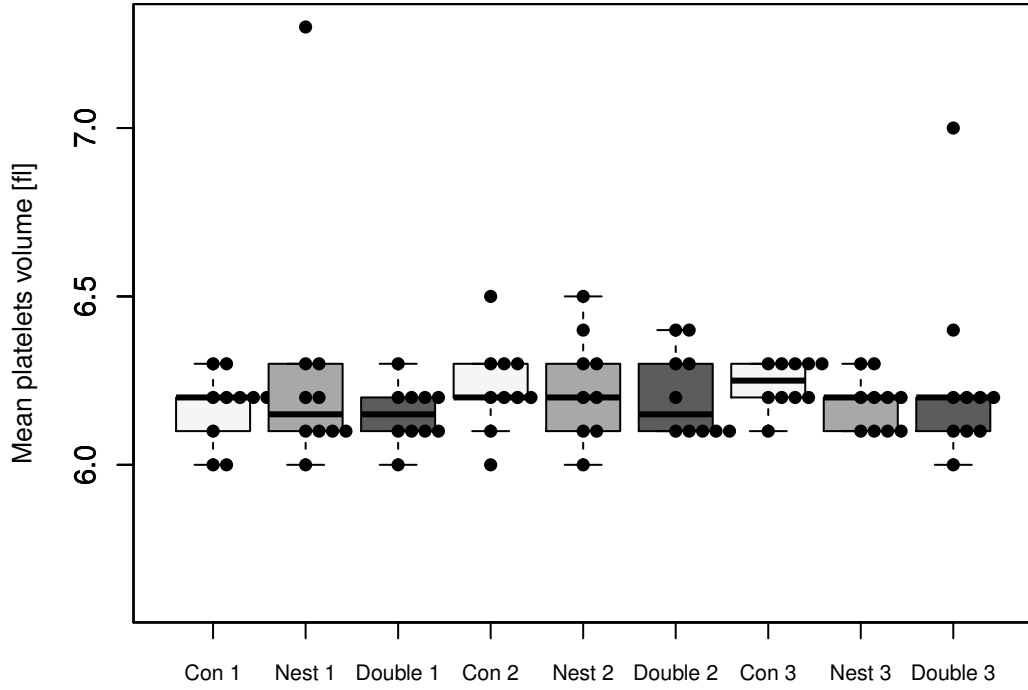**D2 female**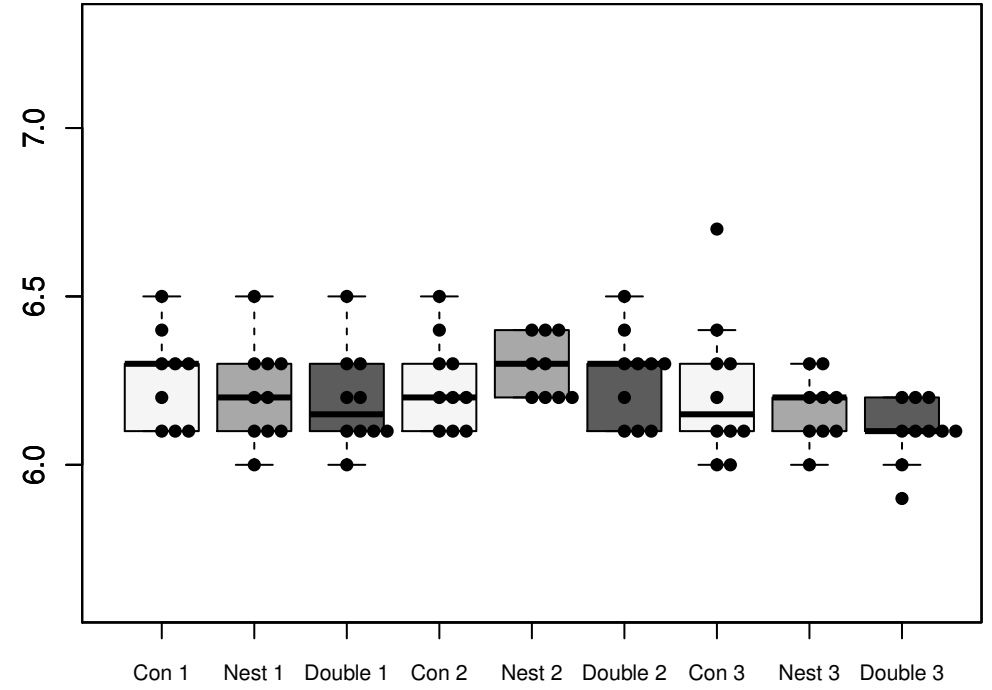**B6 male**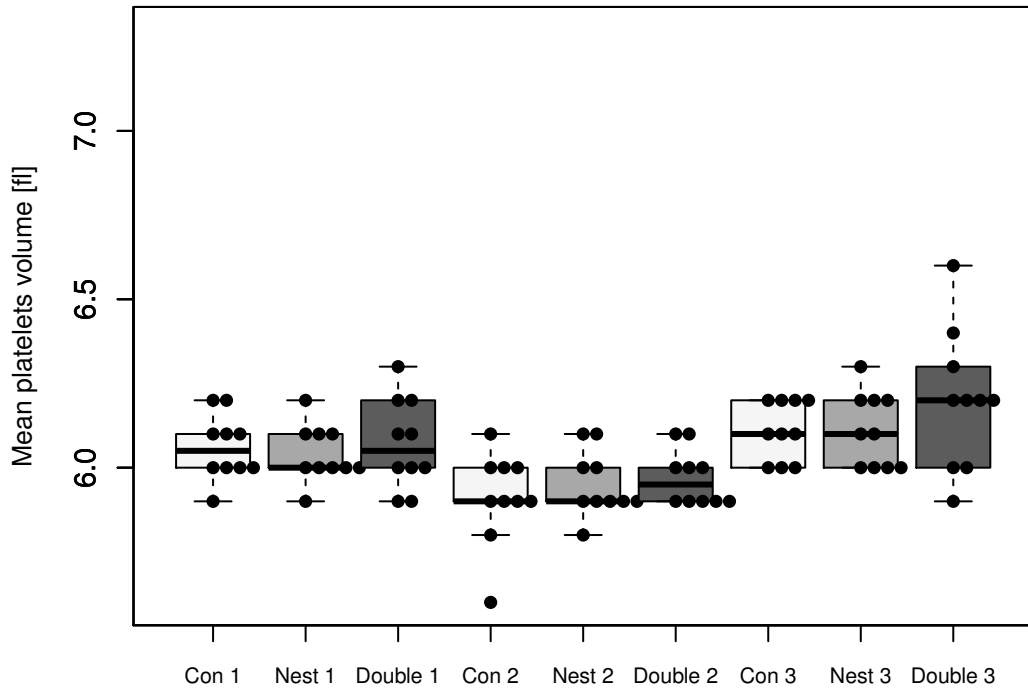**D2 male**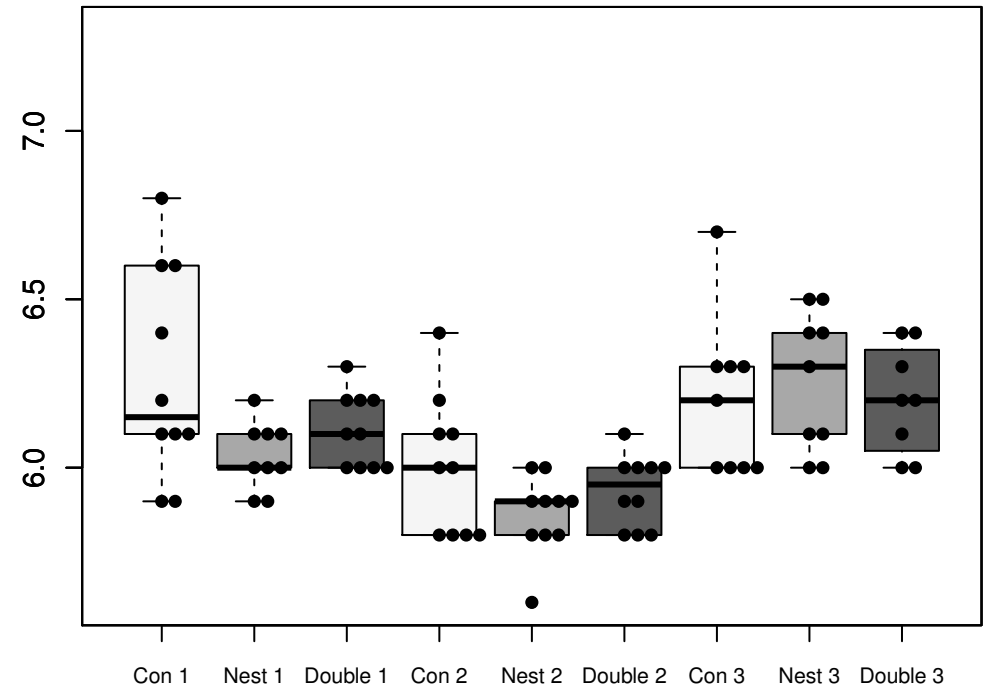



**B6 female**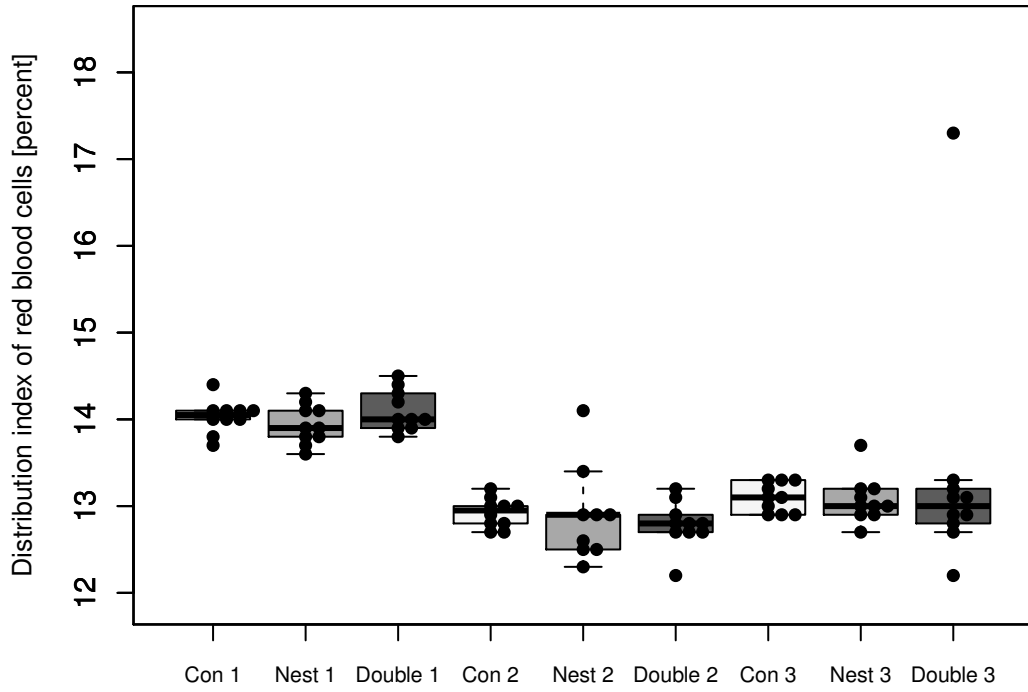**D2 female**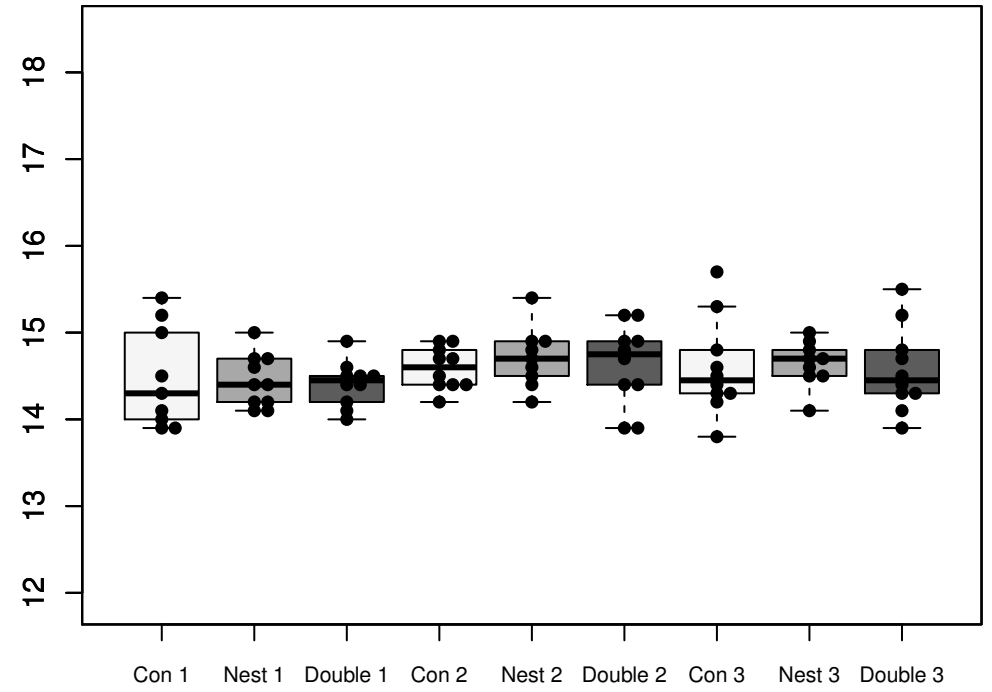**B6 male**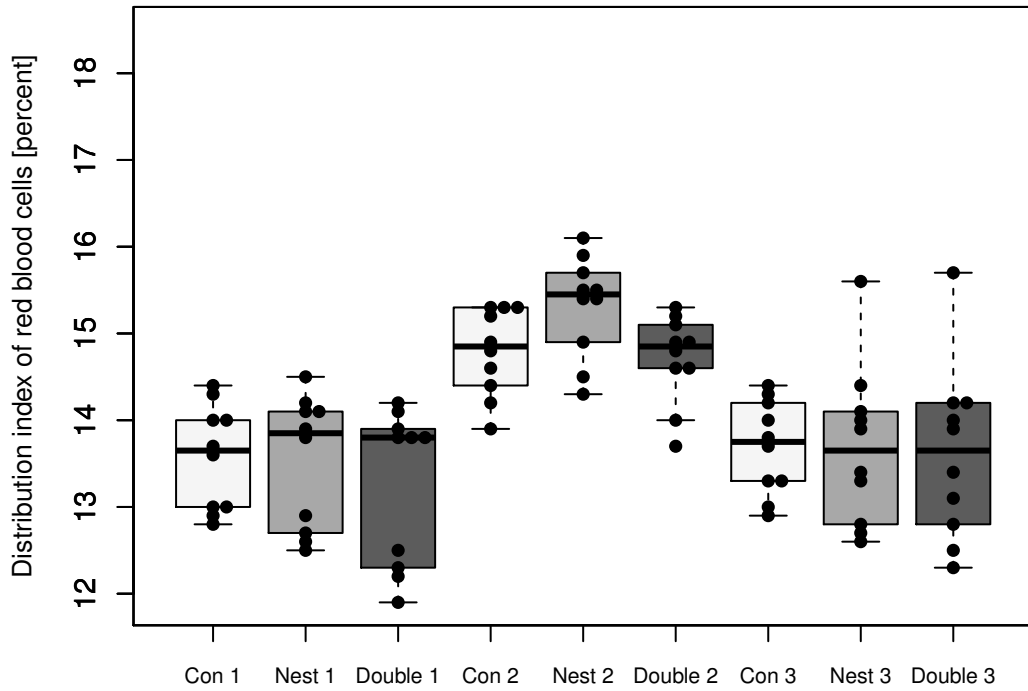**D2 male**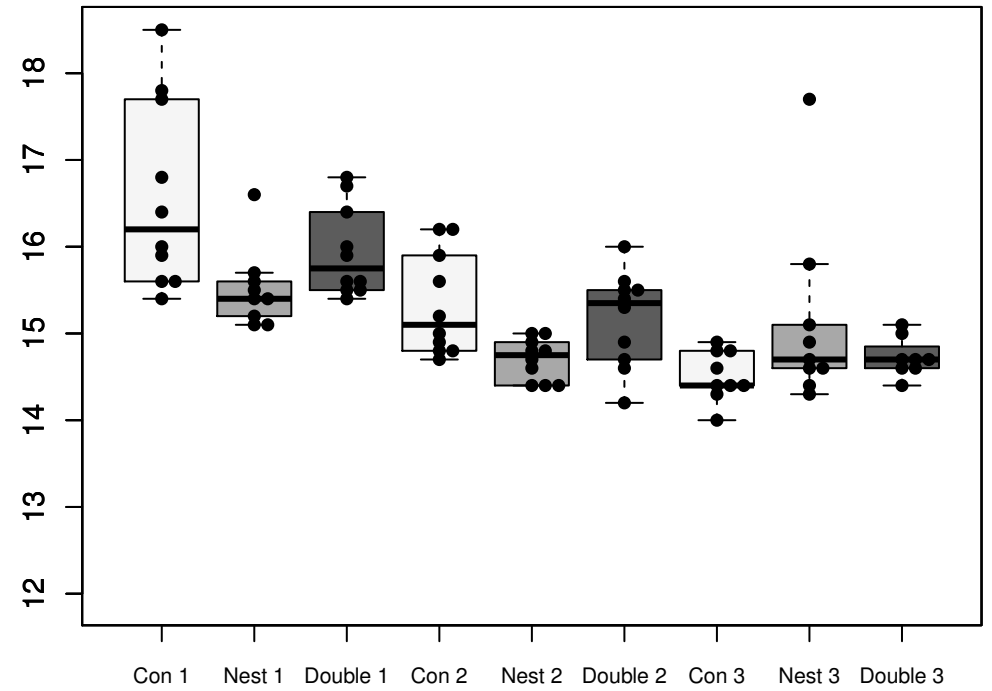

**B6 female**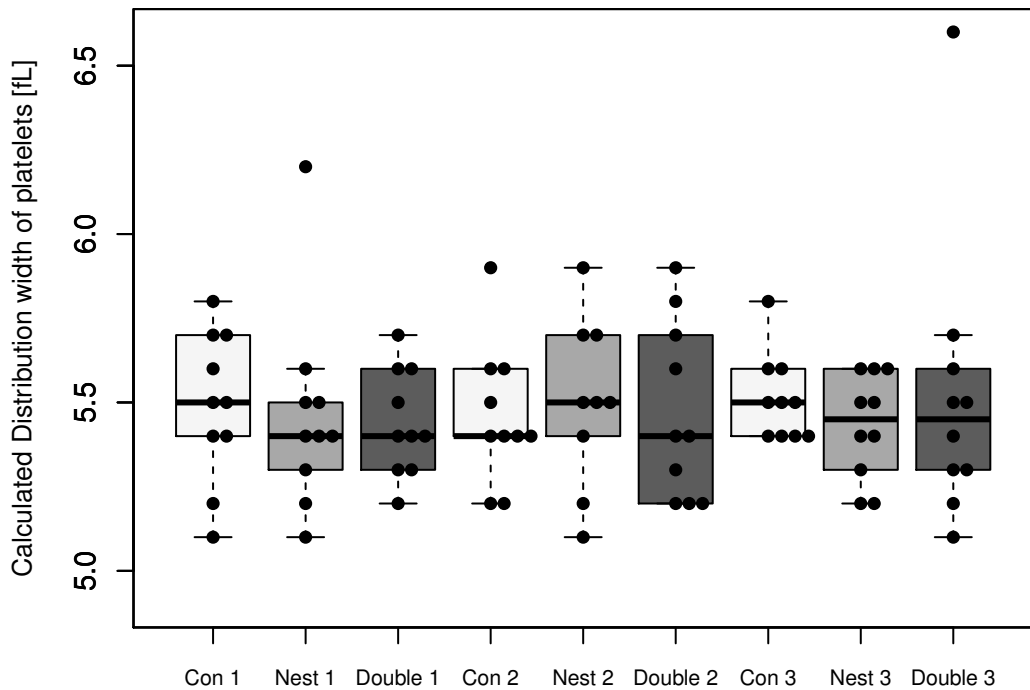**D2 female**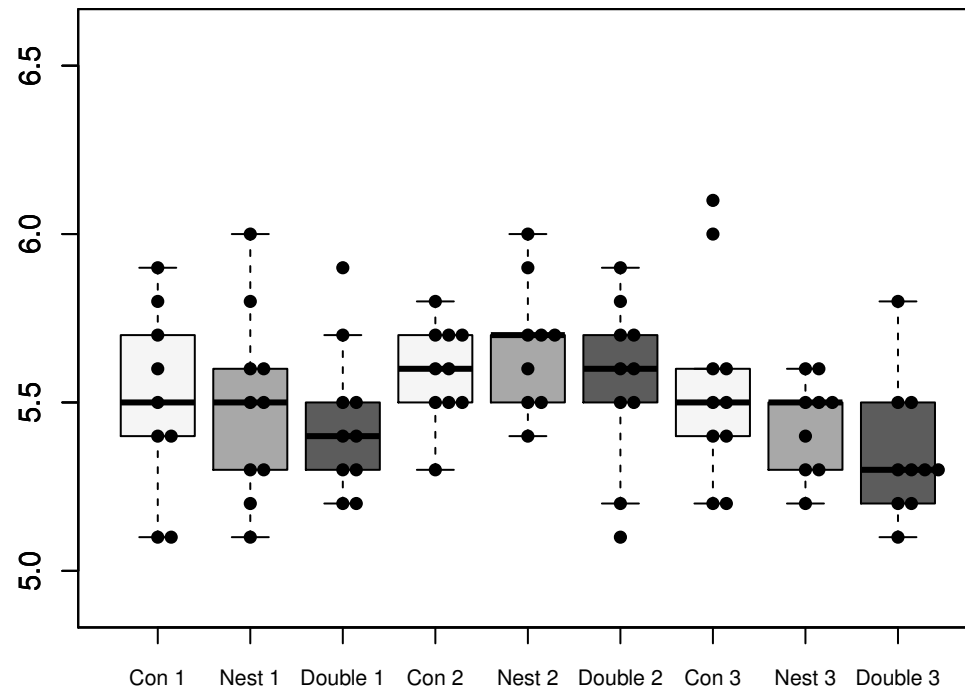**B6 male**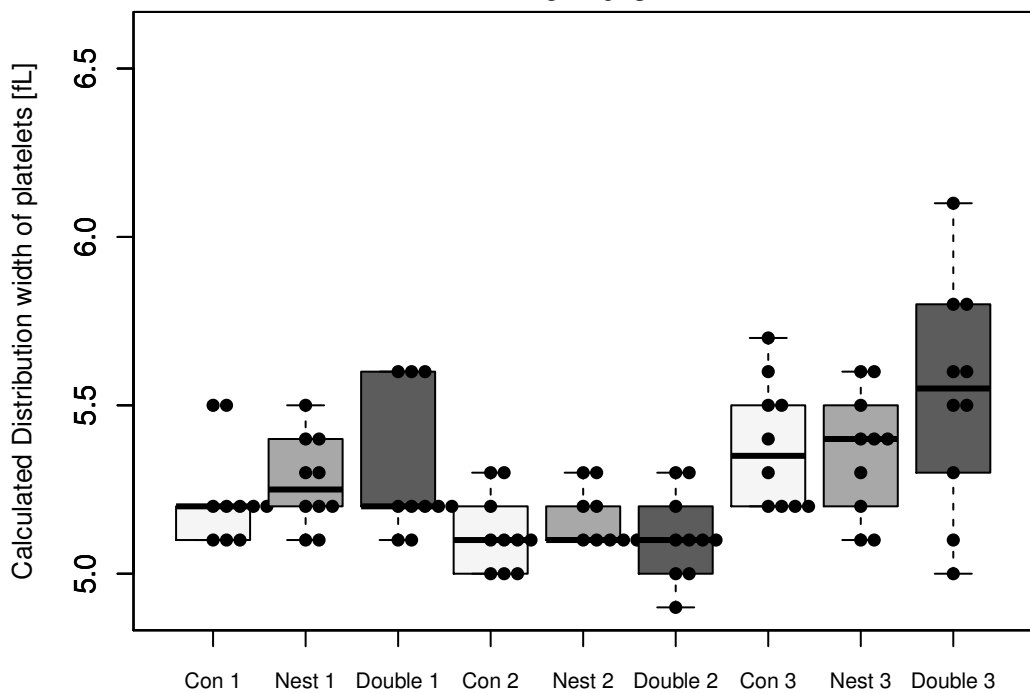**D2 male**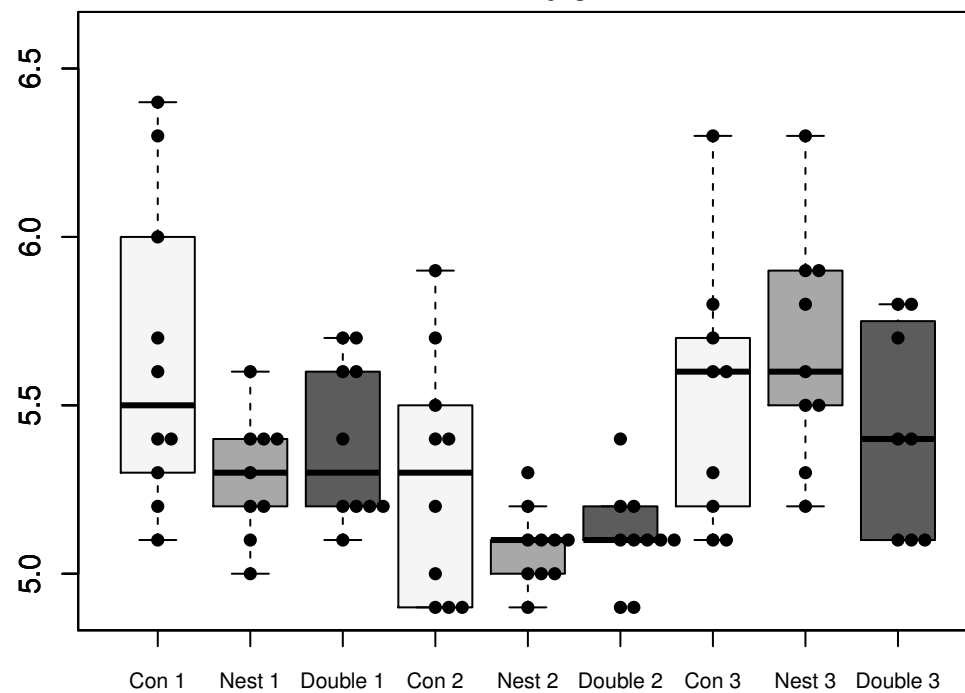

**B6 female**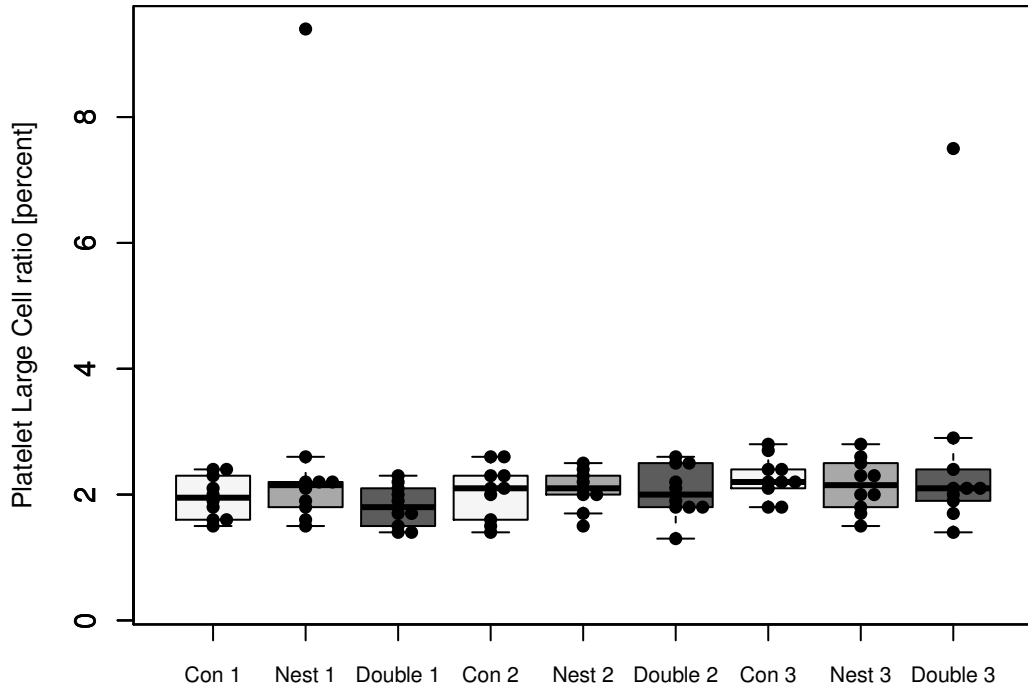**D2 female**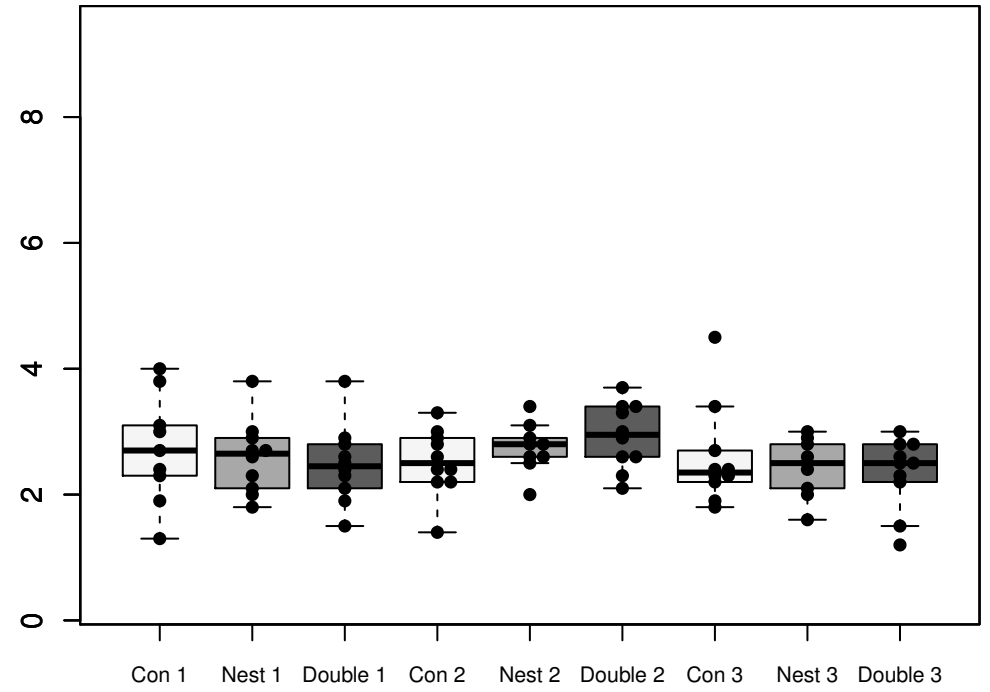**B6 male**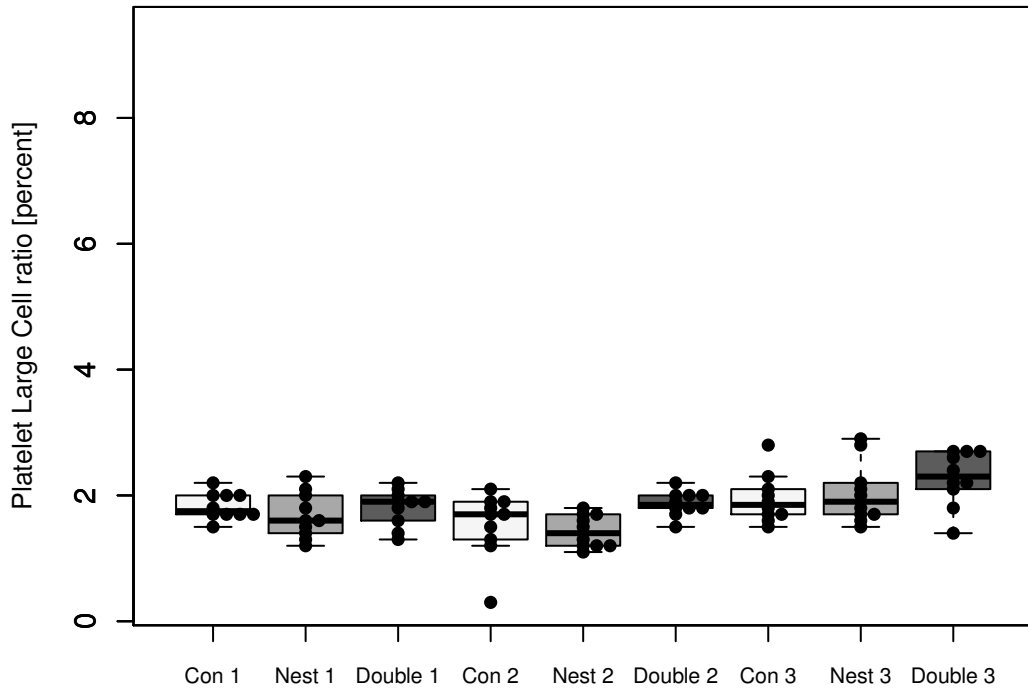**D2 male**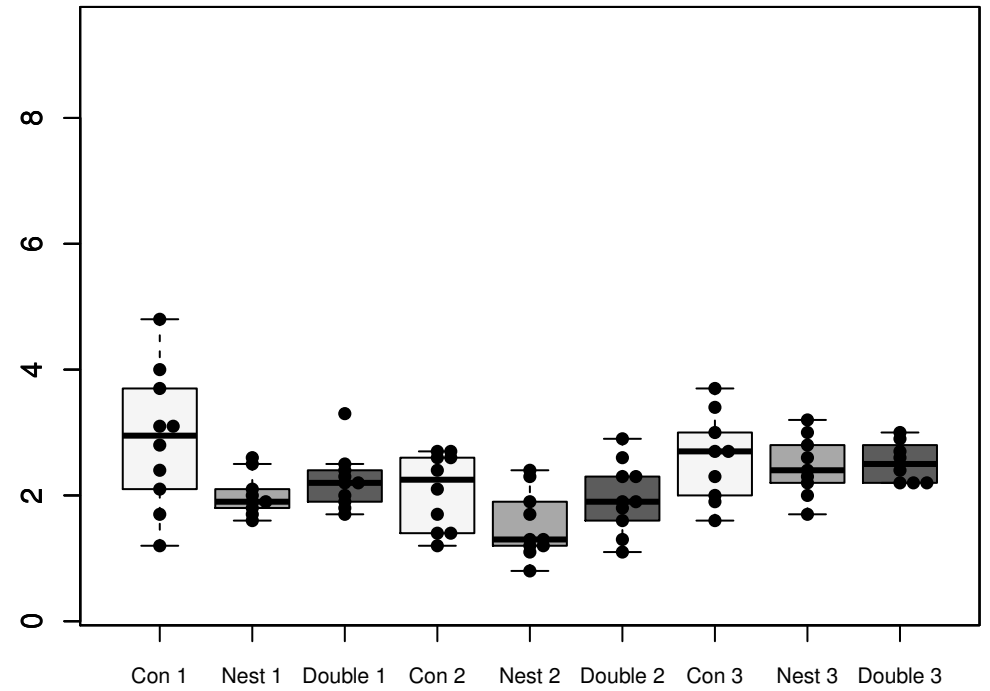

**B6 female**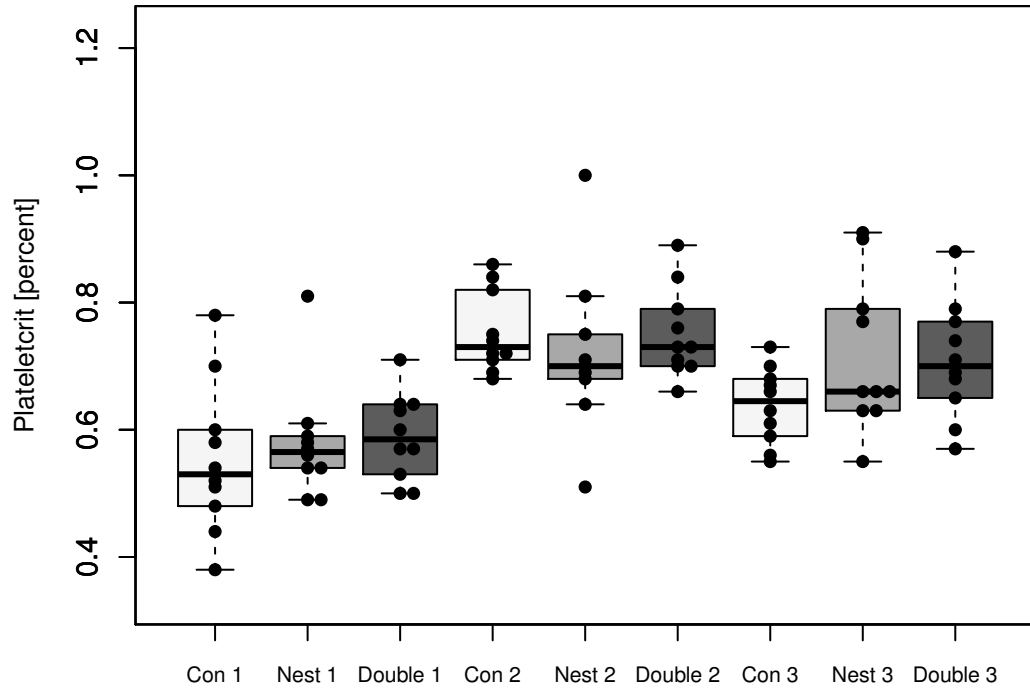**D2 female**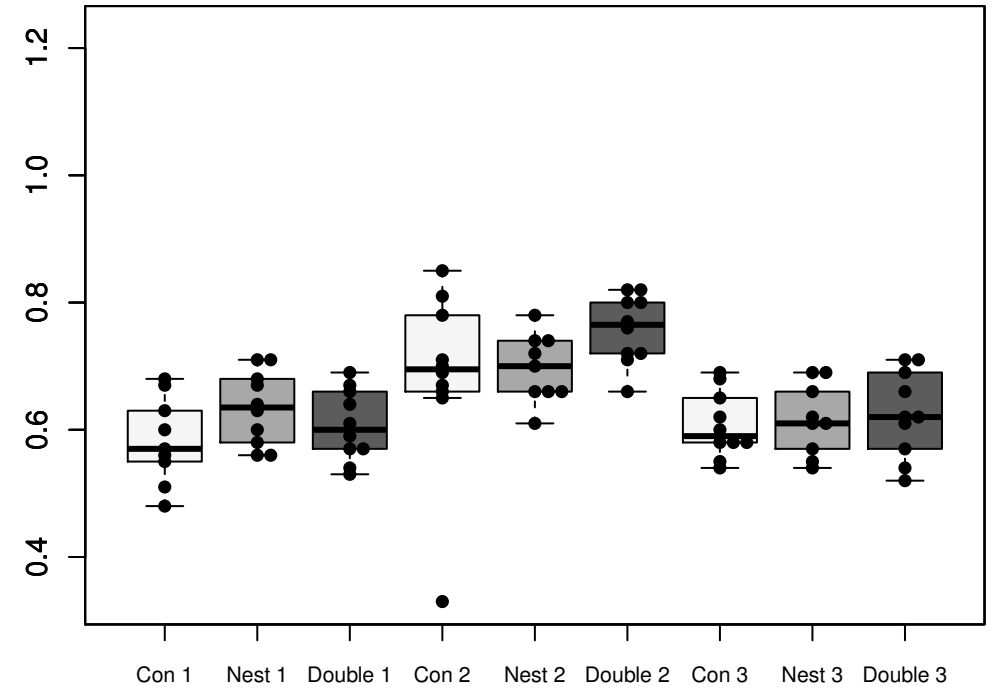**B6 male**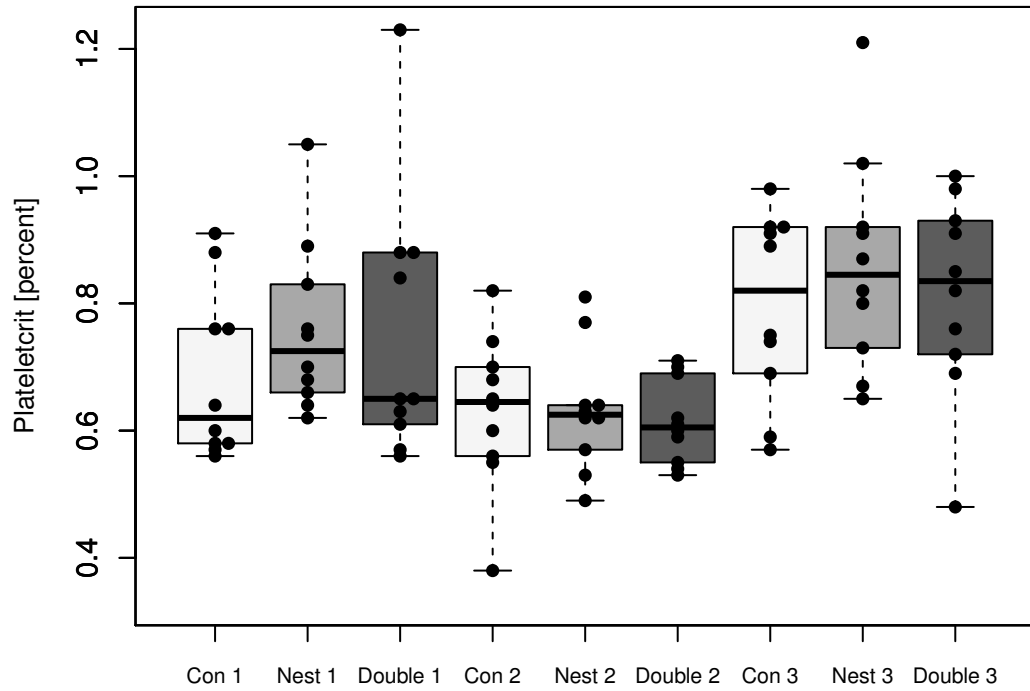**D2 male**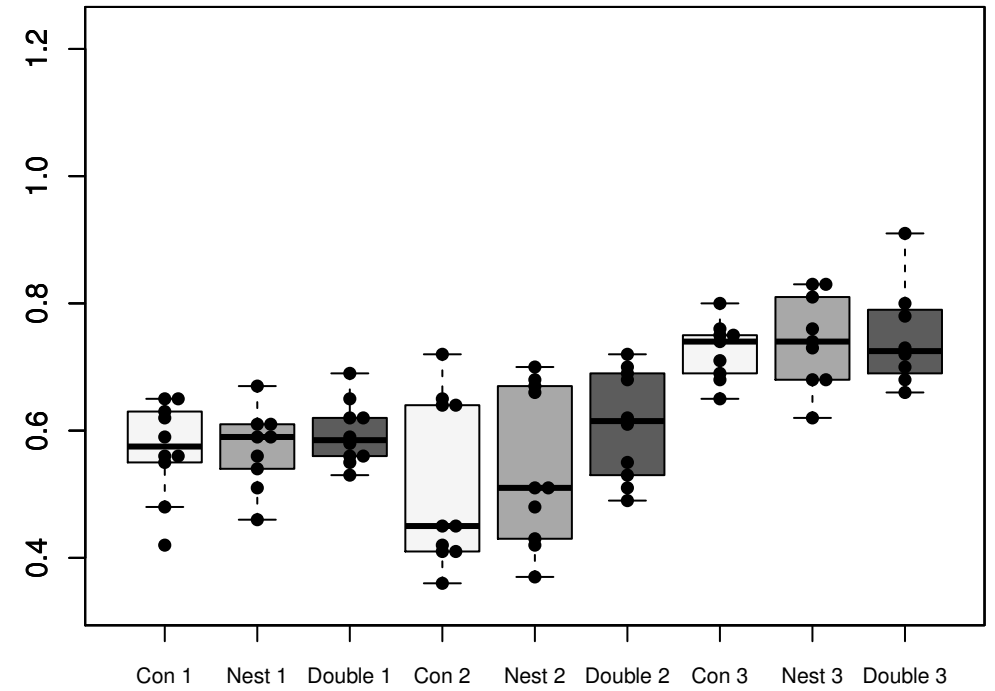

**B6 female**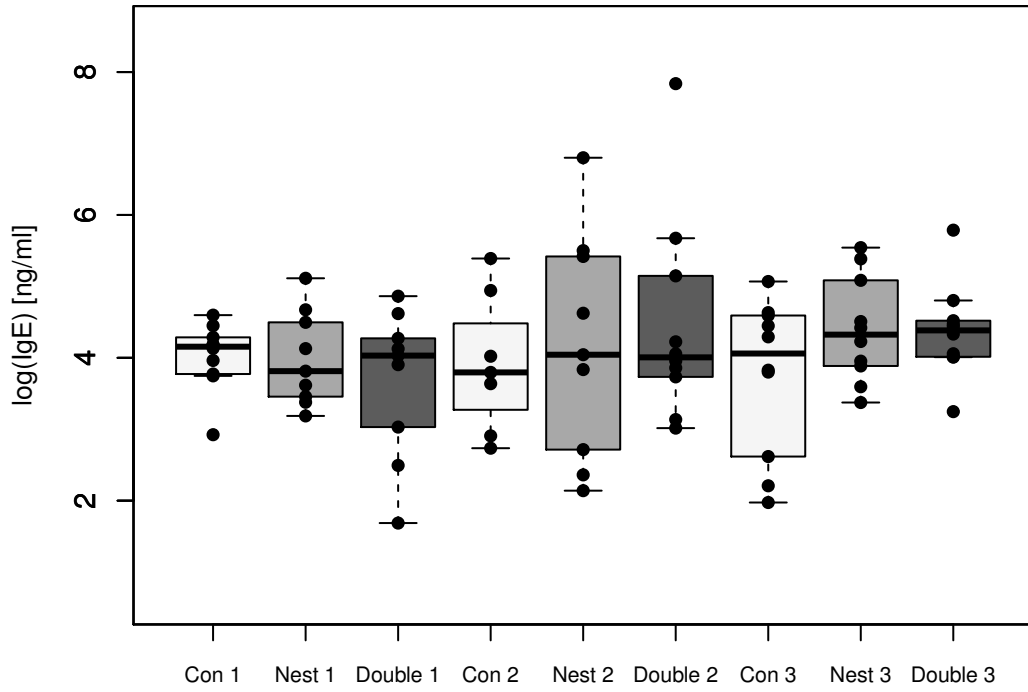**D2 female**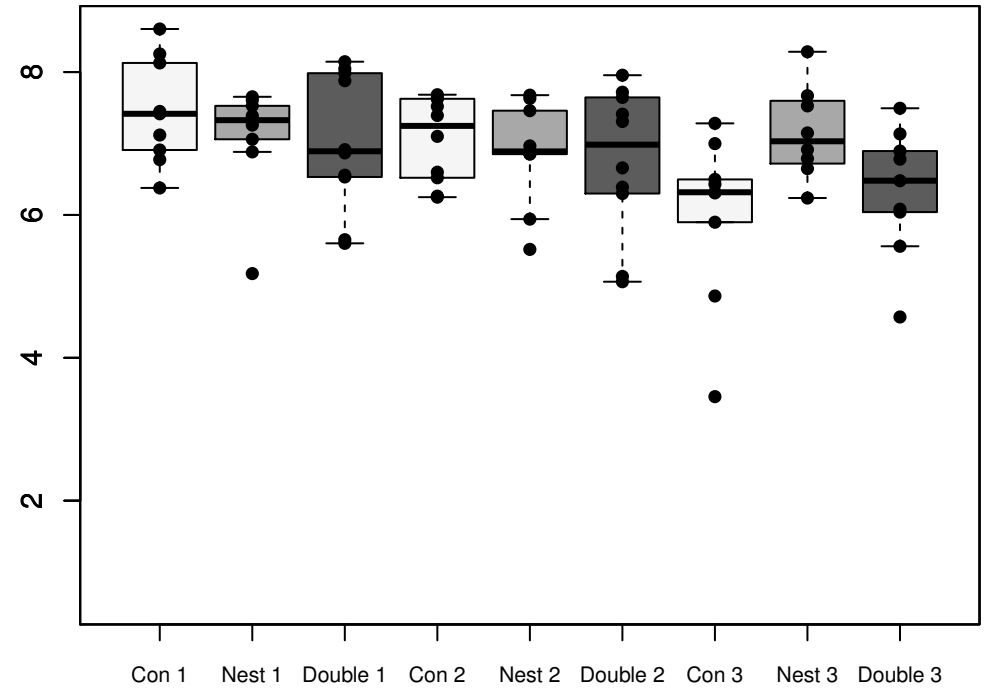**B6 male**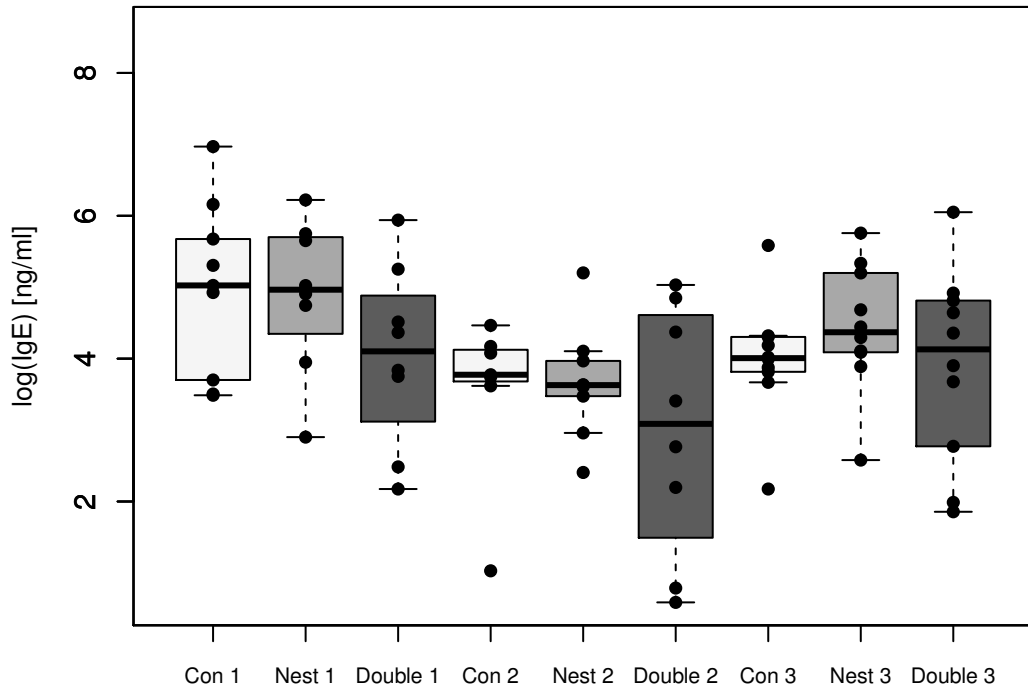**D2 male**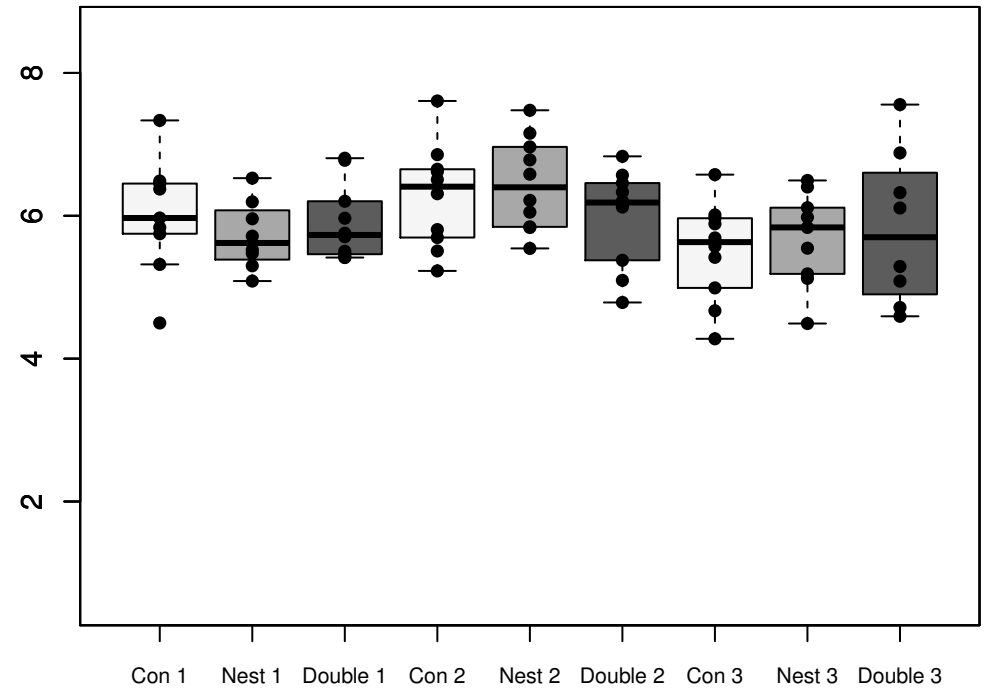

**B6 female**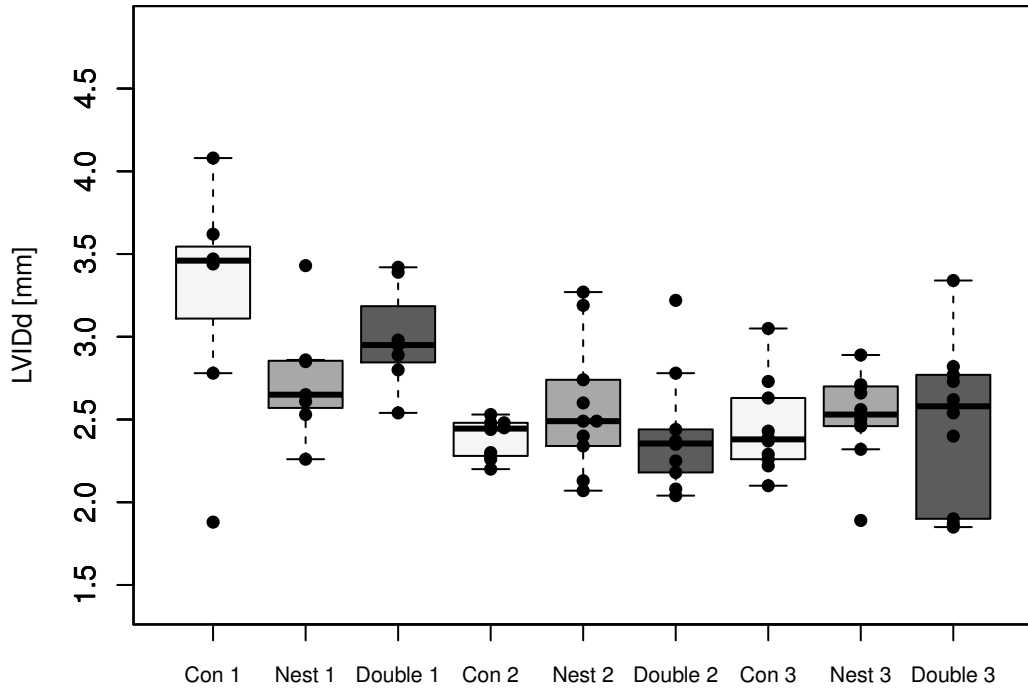**D2 female**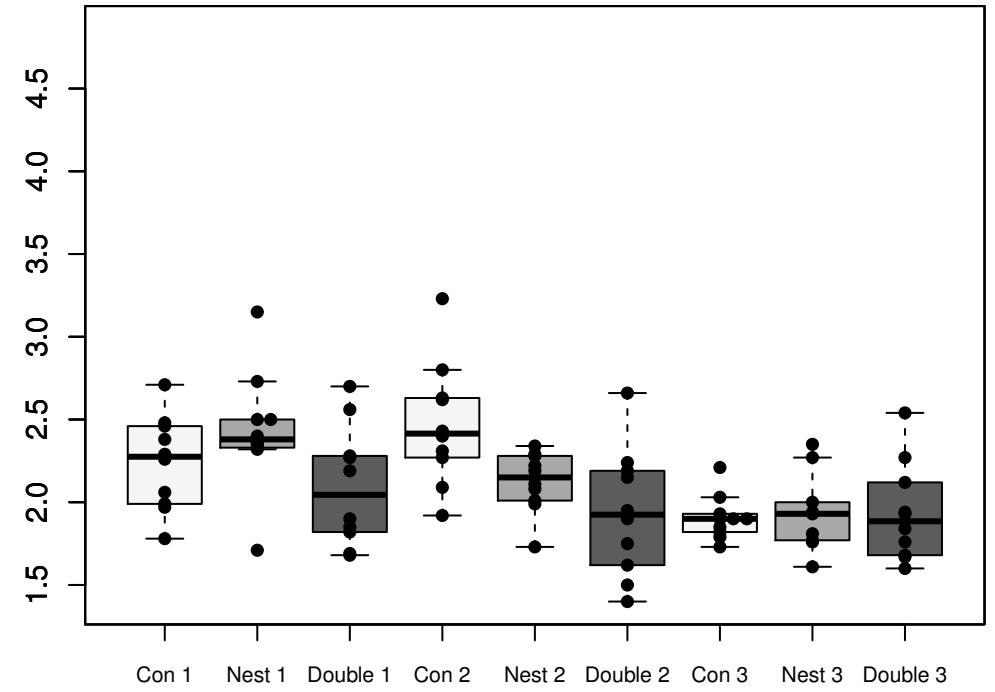**B6 male**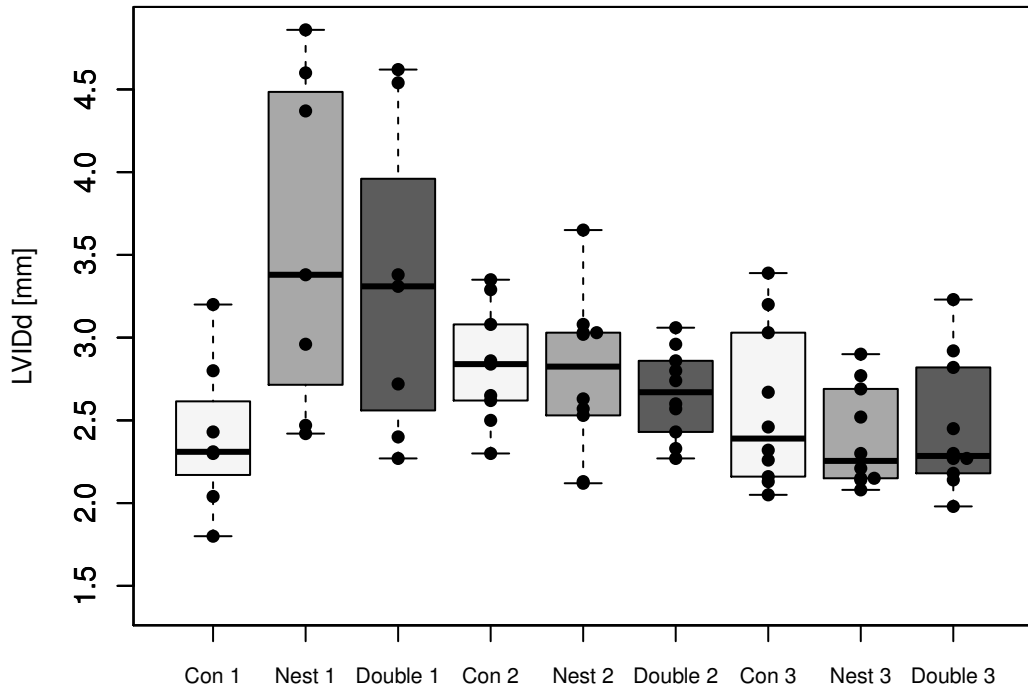**D2 male**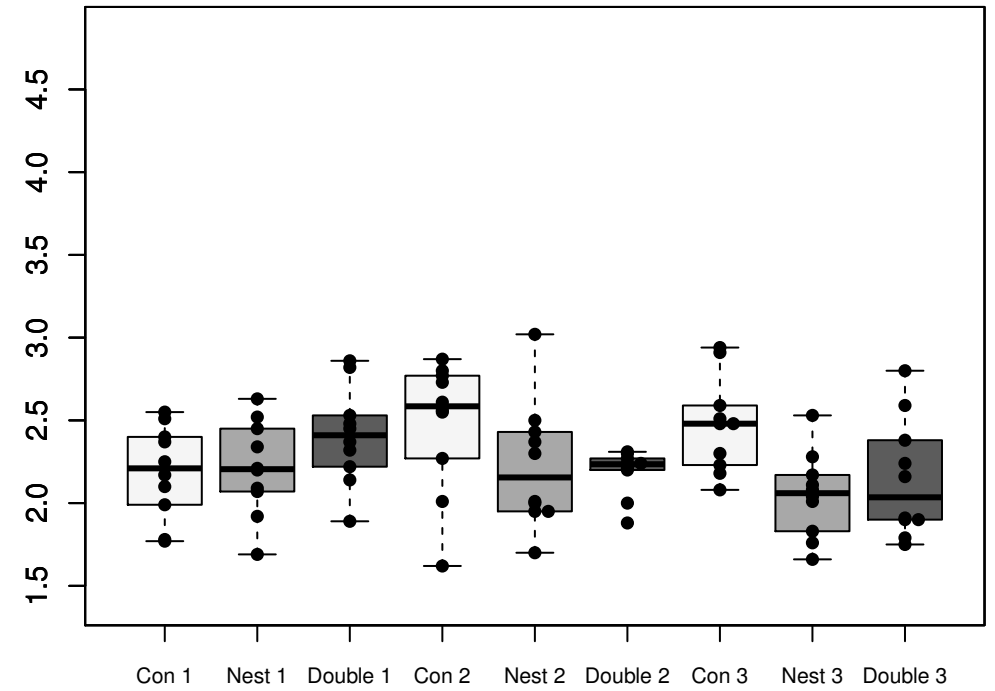

**B6 female**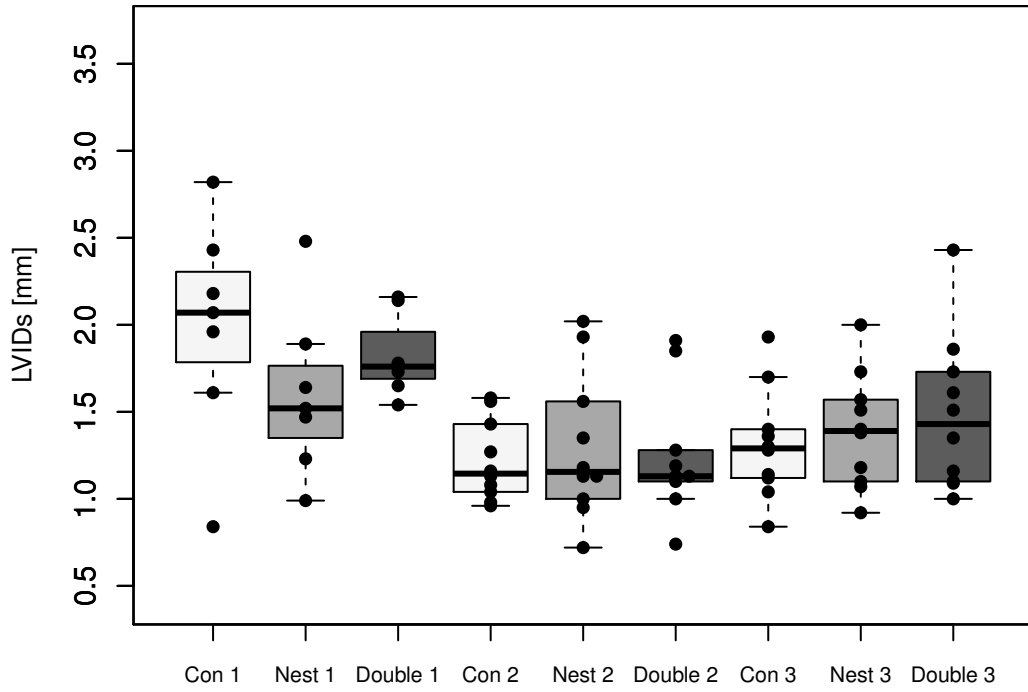**D2 female**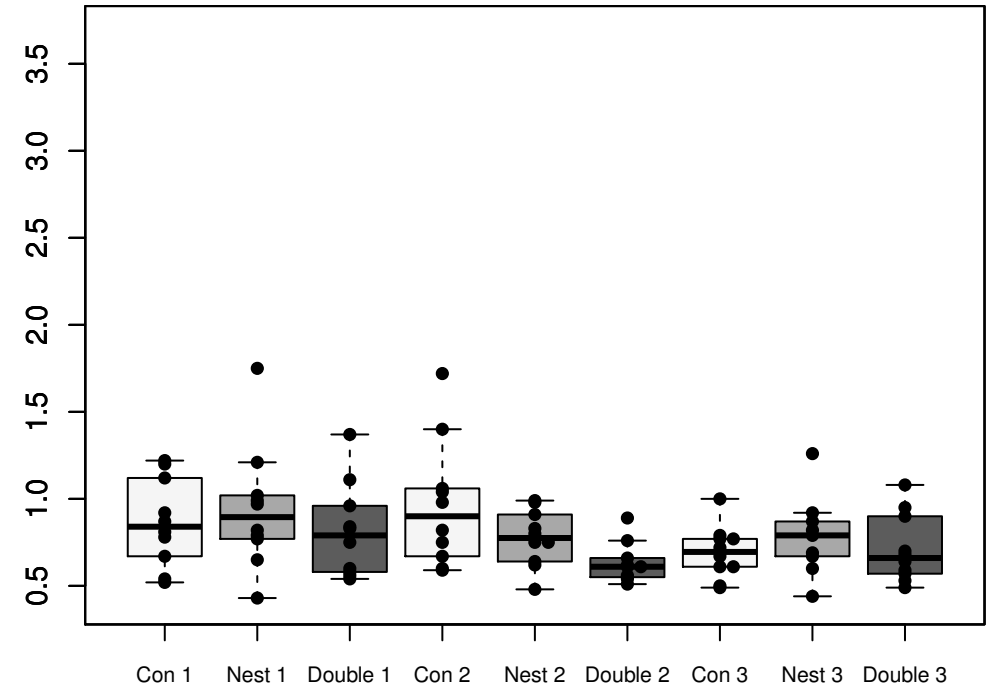**B6 male**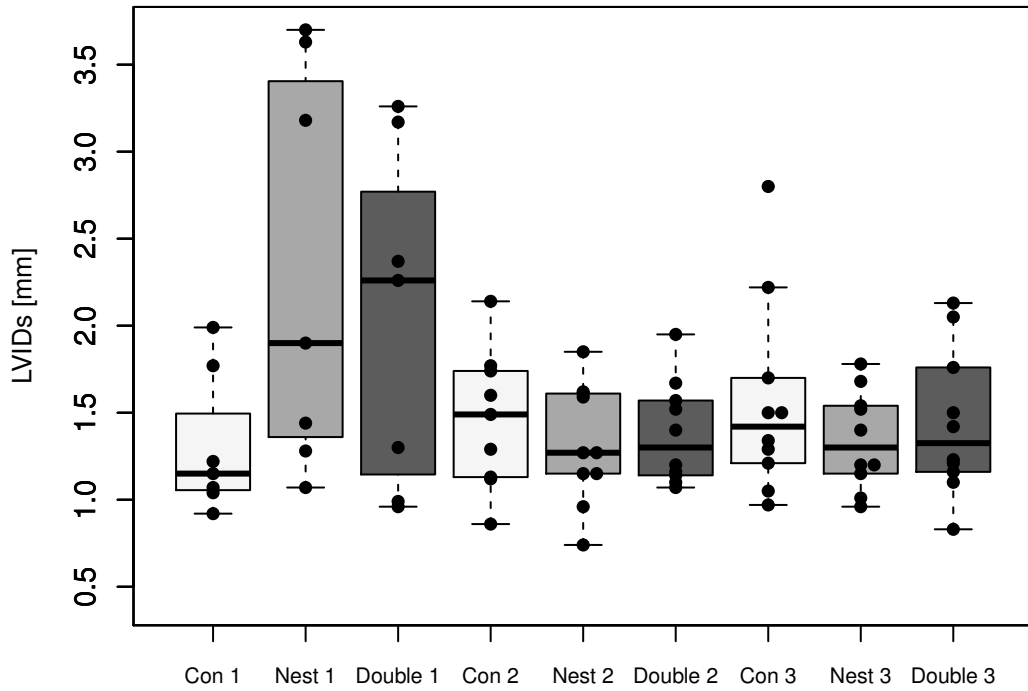**D2 male**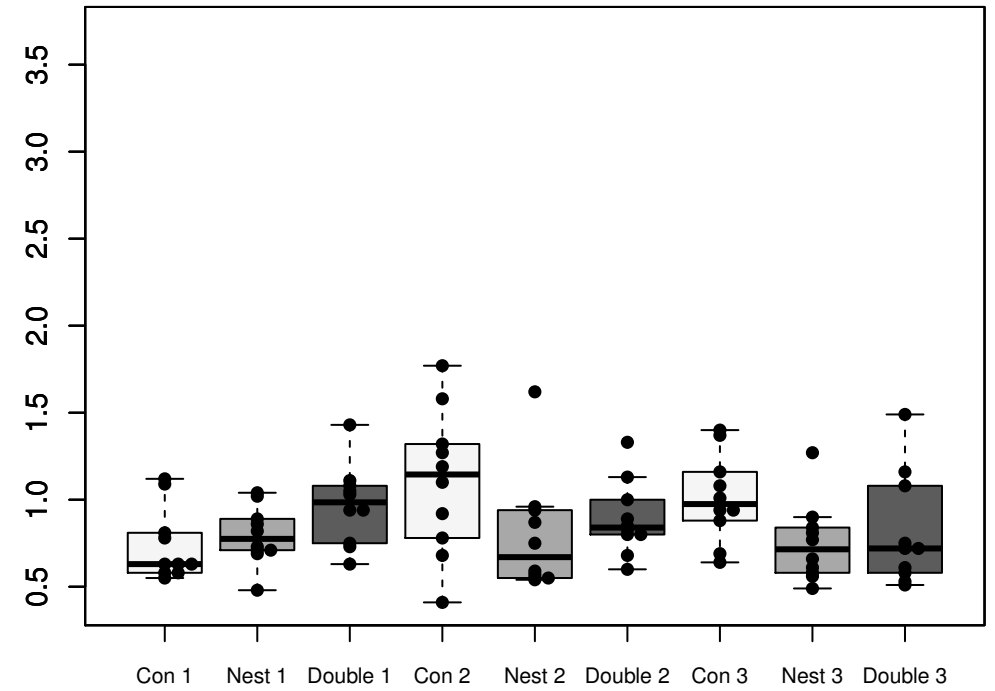

**B6 female**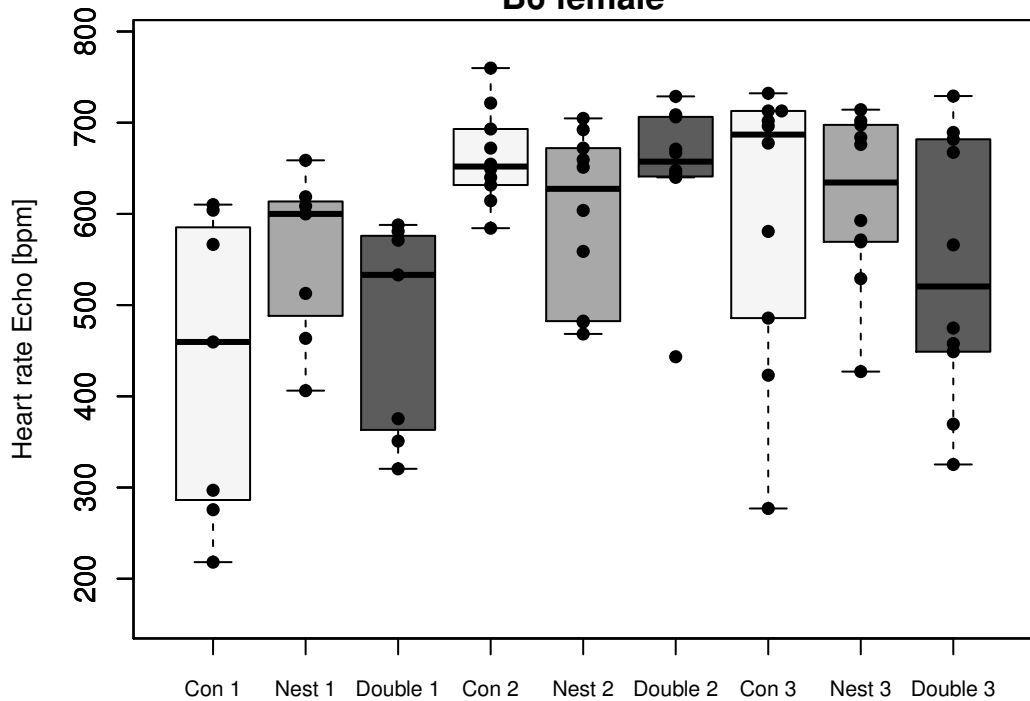**D2 female**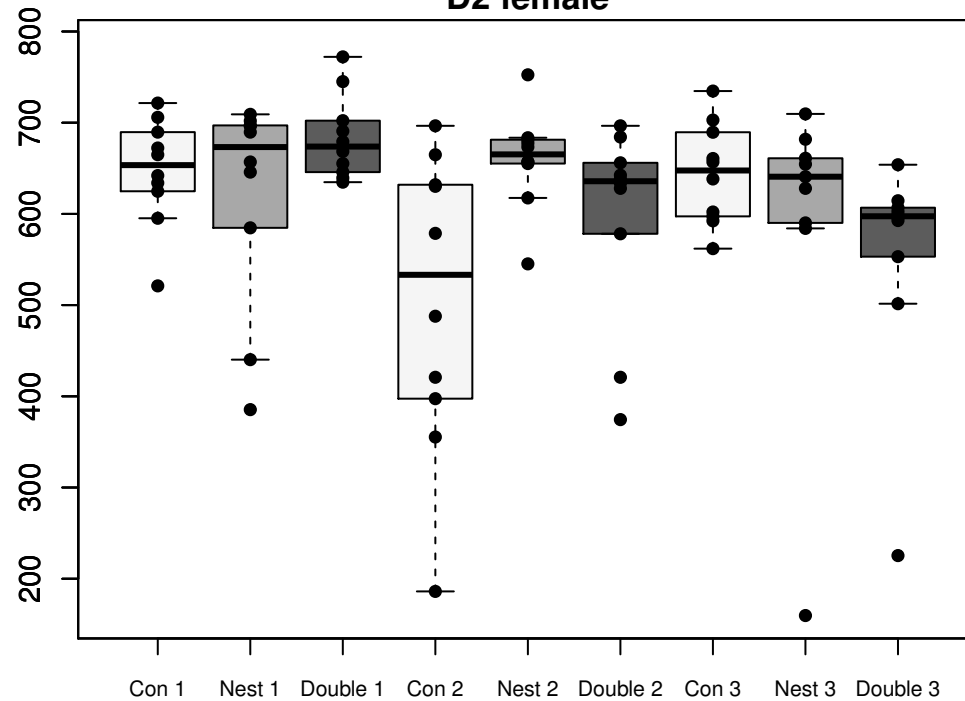**B6 male**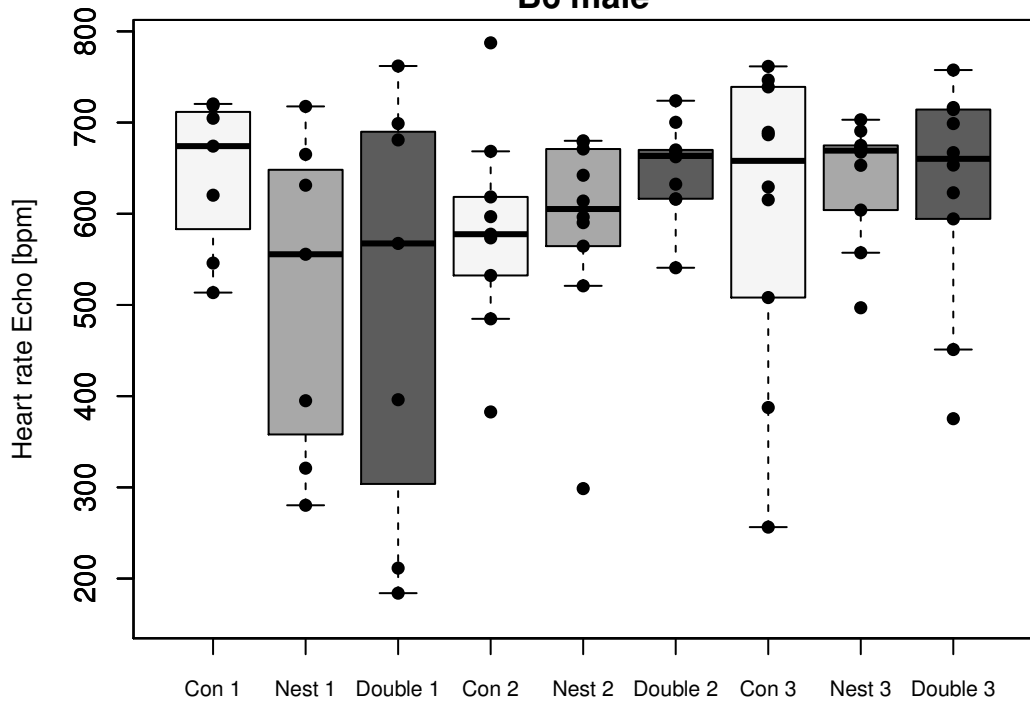**D2 male**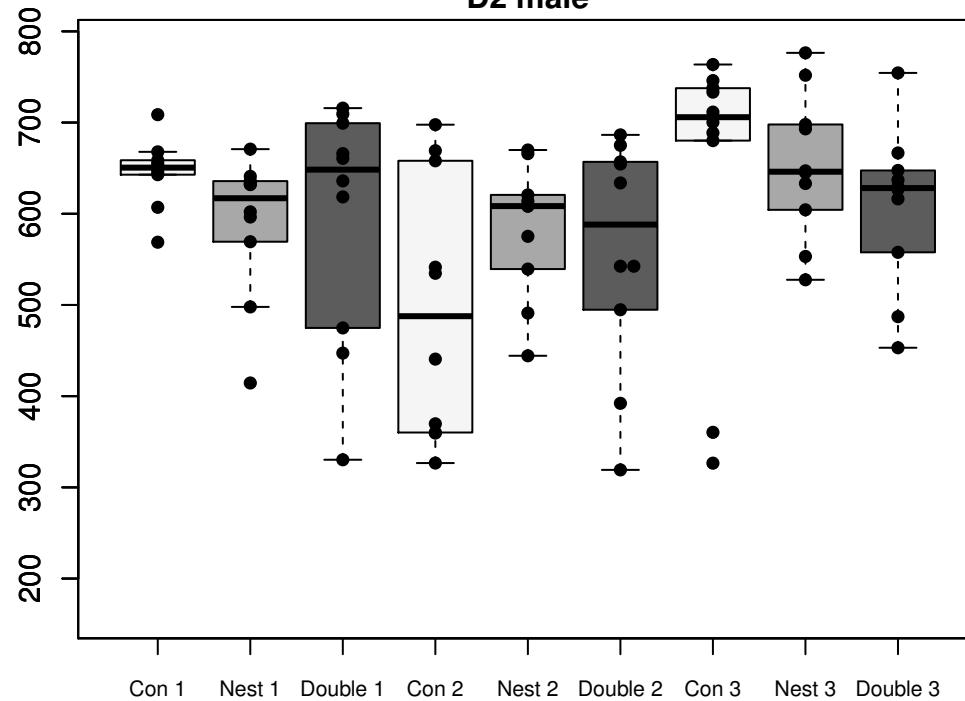



**B6 female**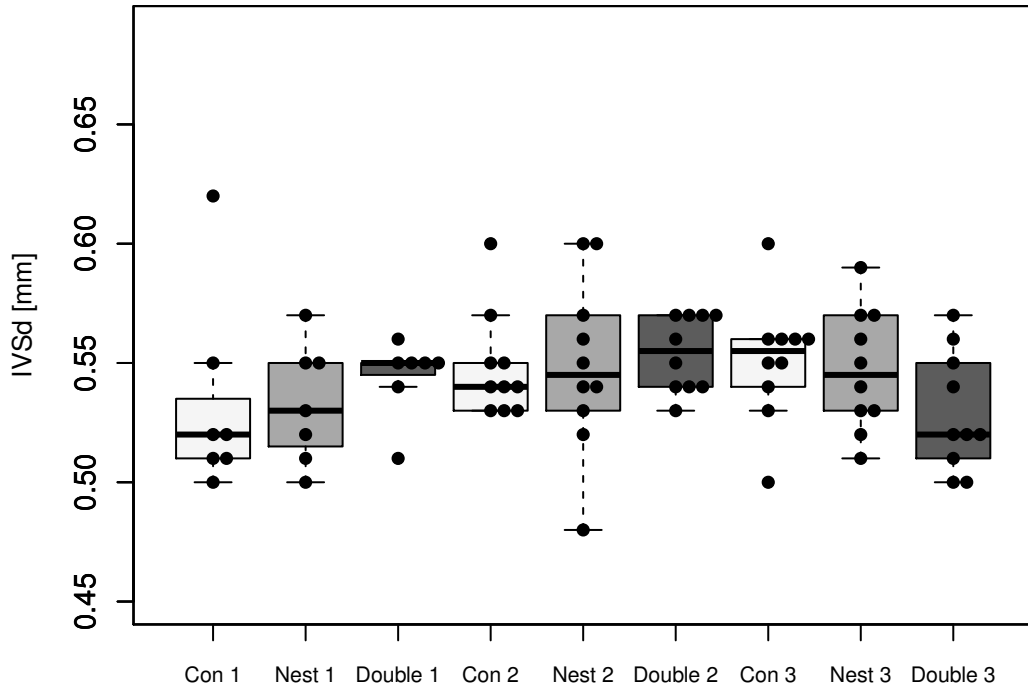**D2 female**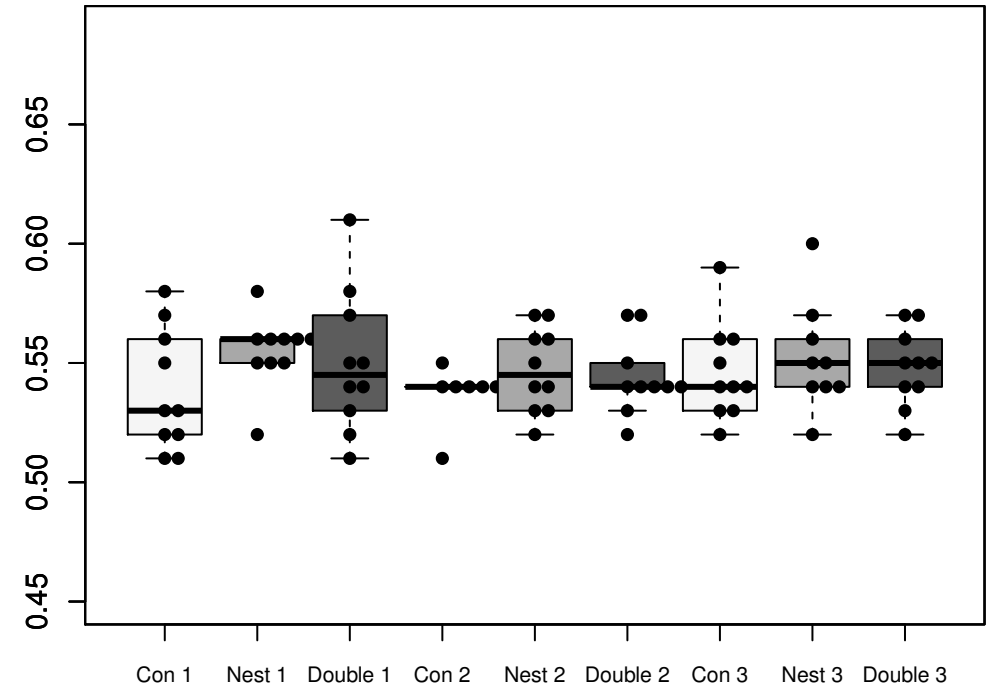**B6 male**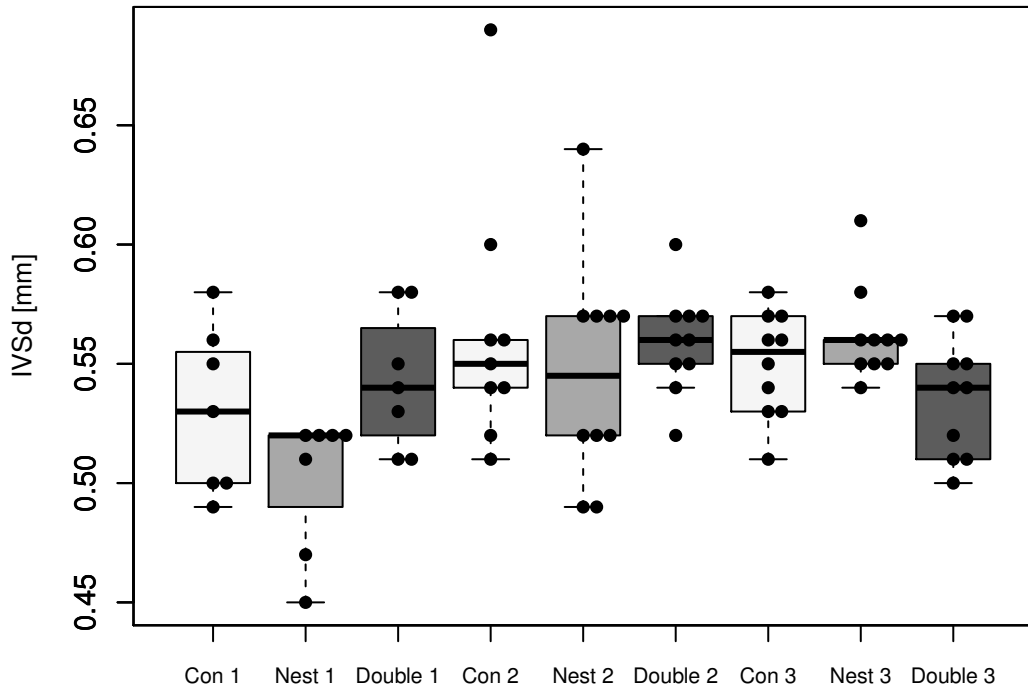**D2 male**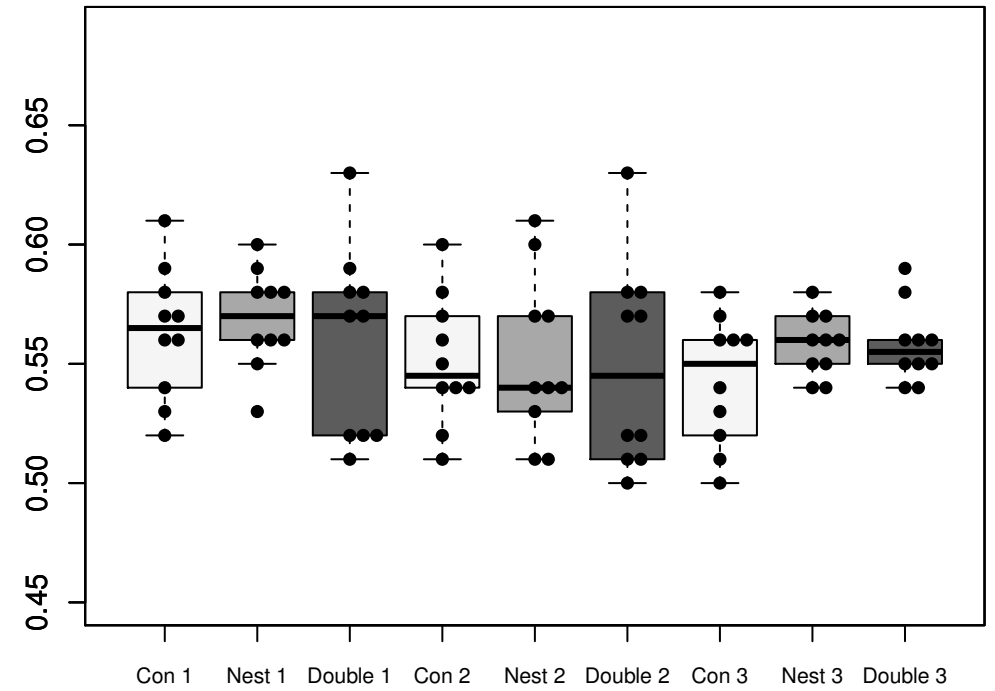

**B6 female**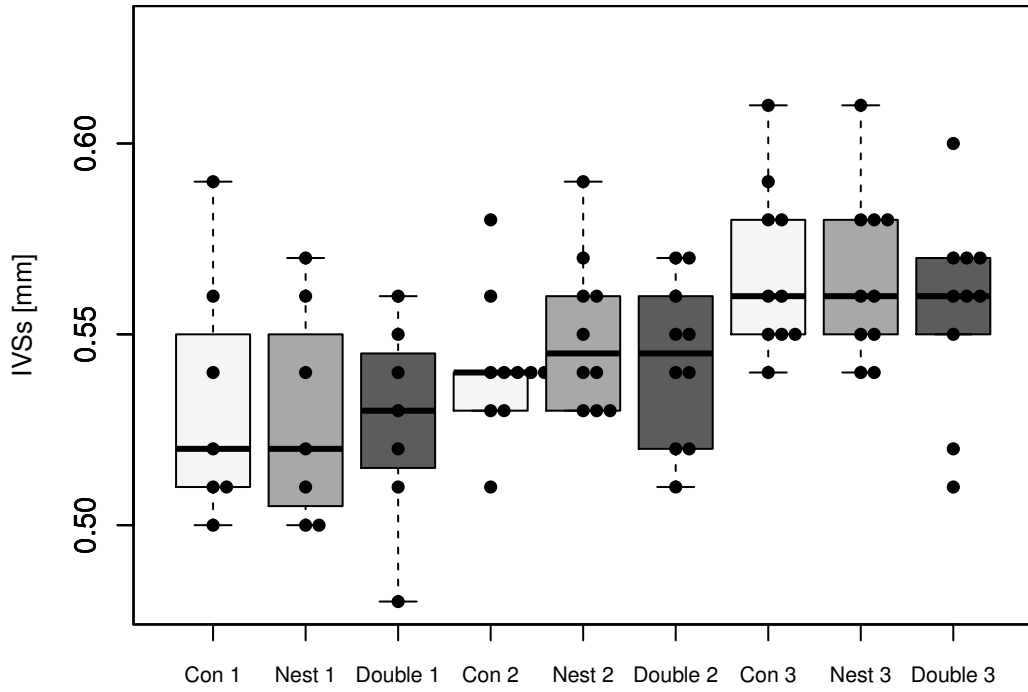**D2 female**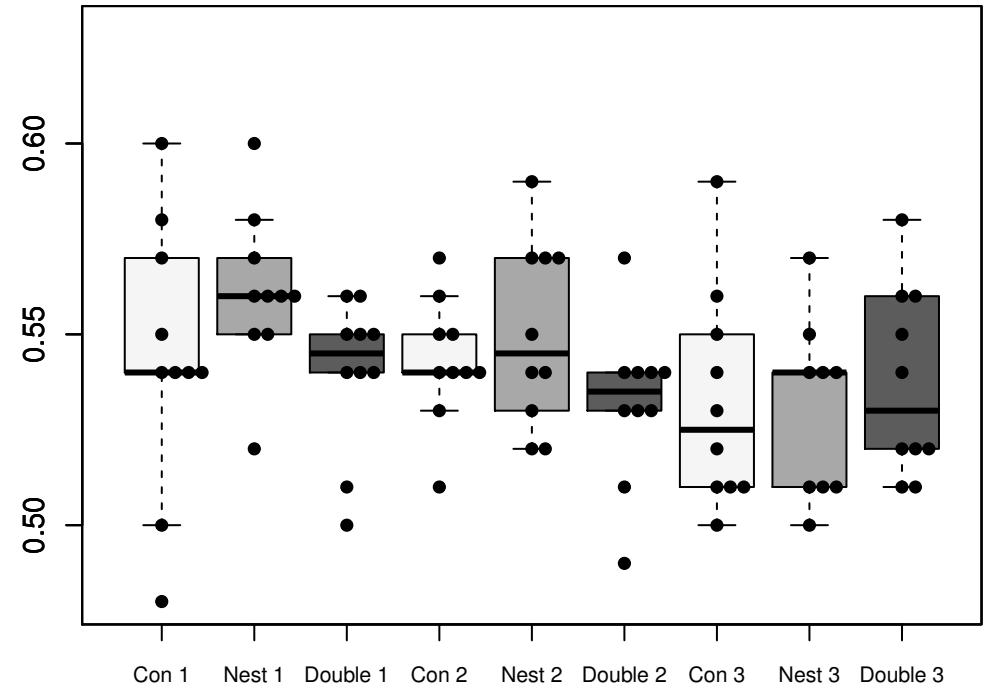**B6 male**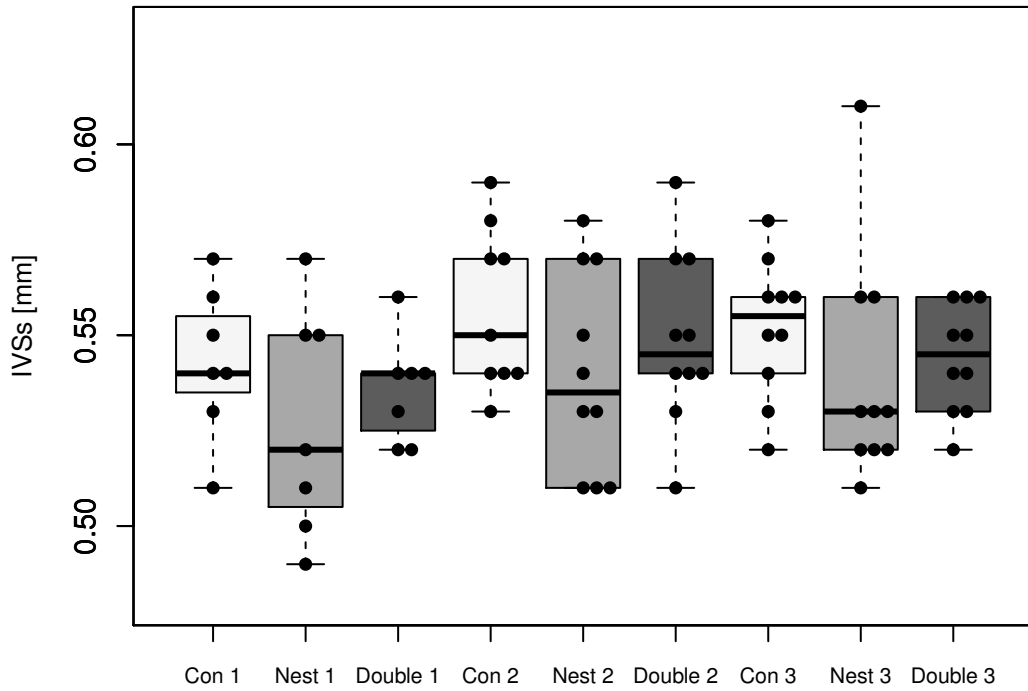**D2 male**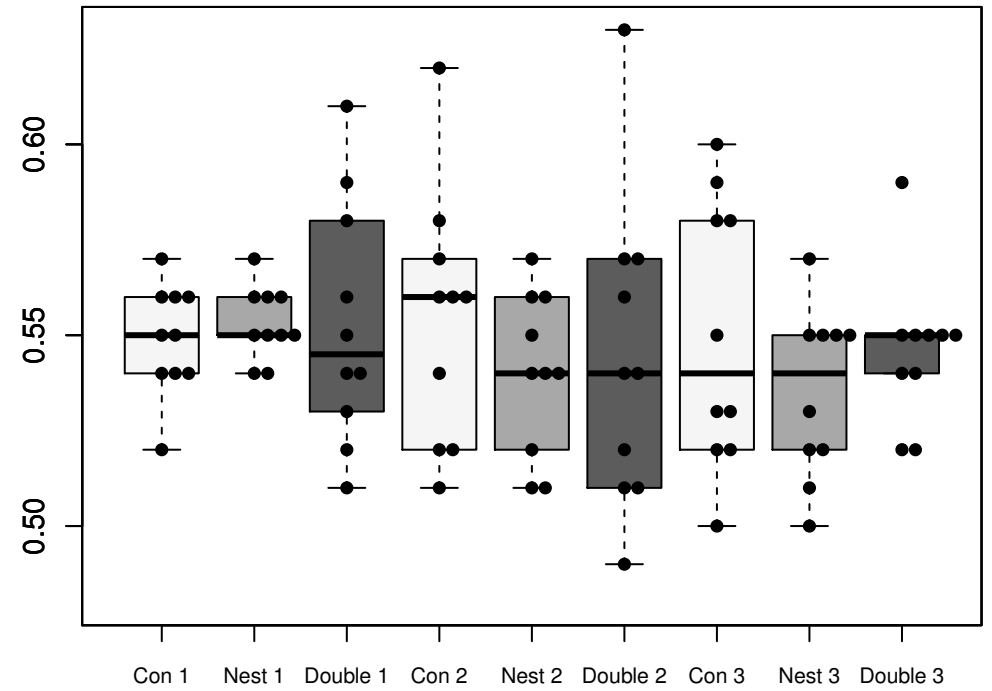

**B6 female**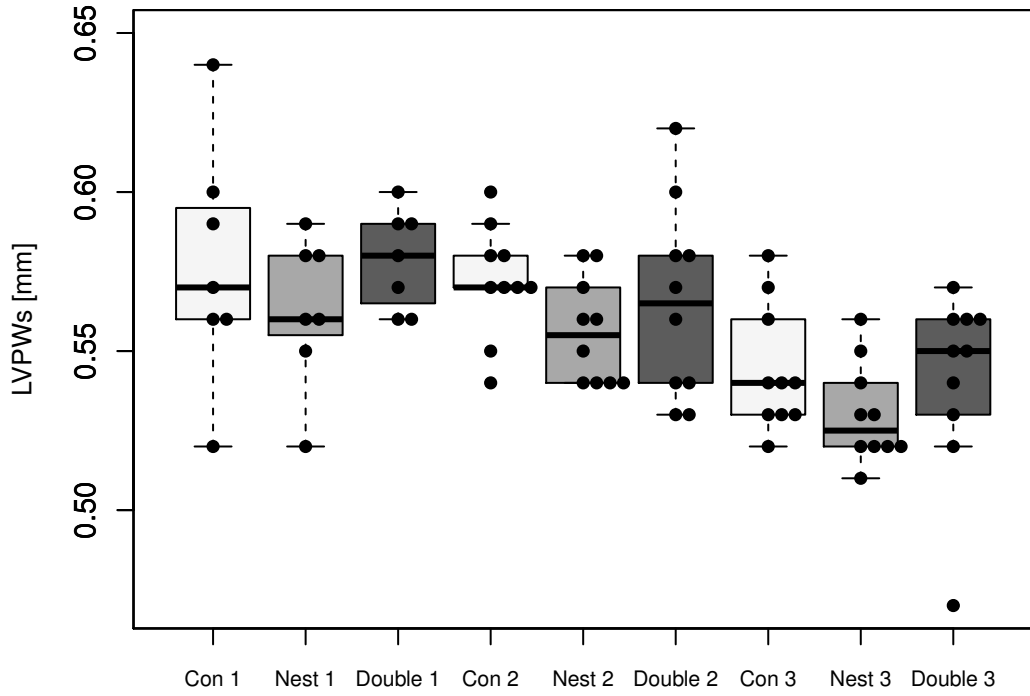**D2 female**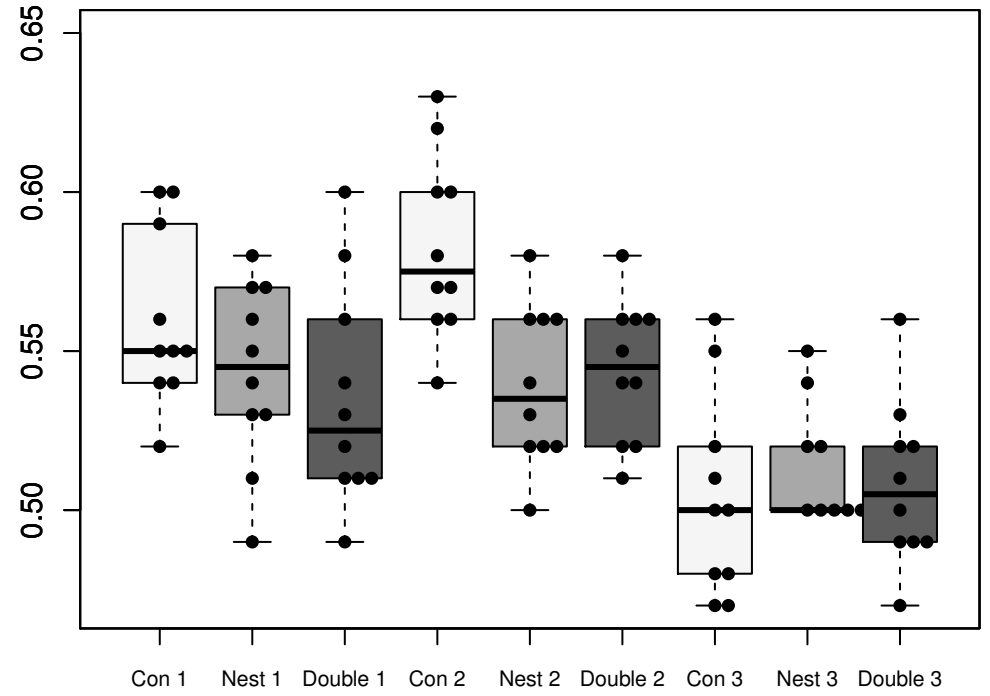**B6 male**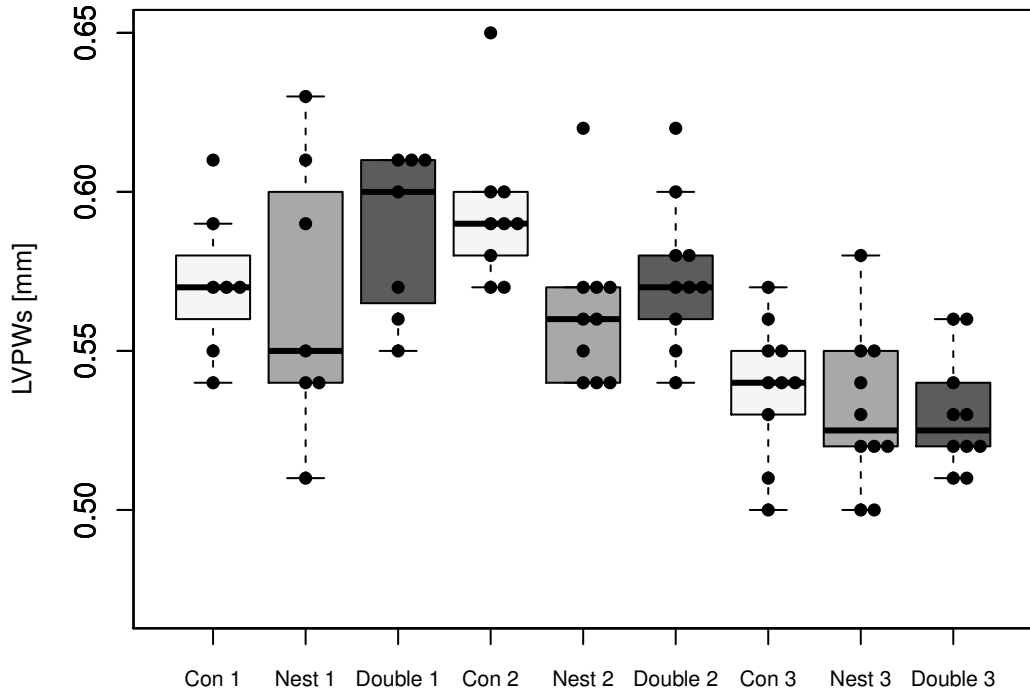**D2 male**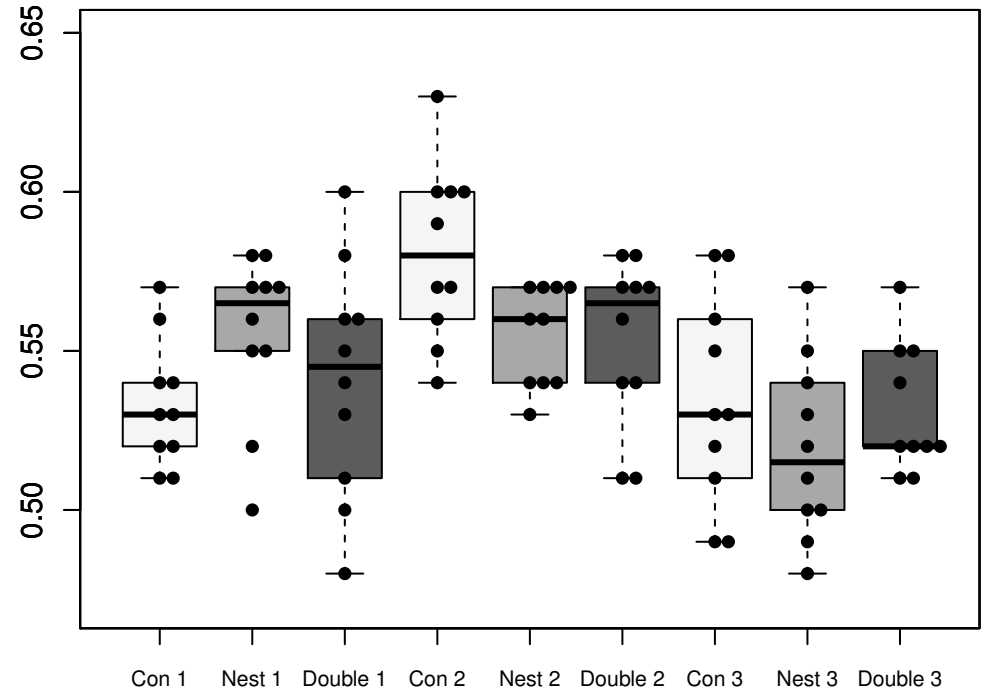

**B6 female**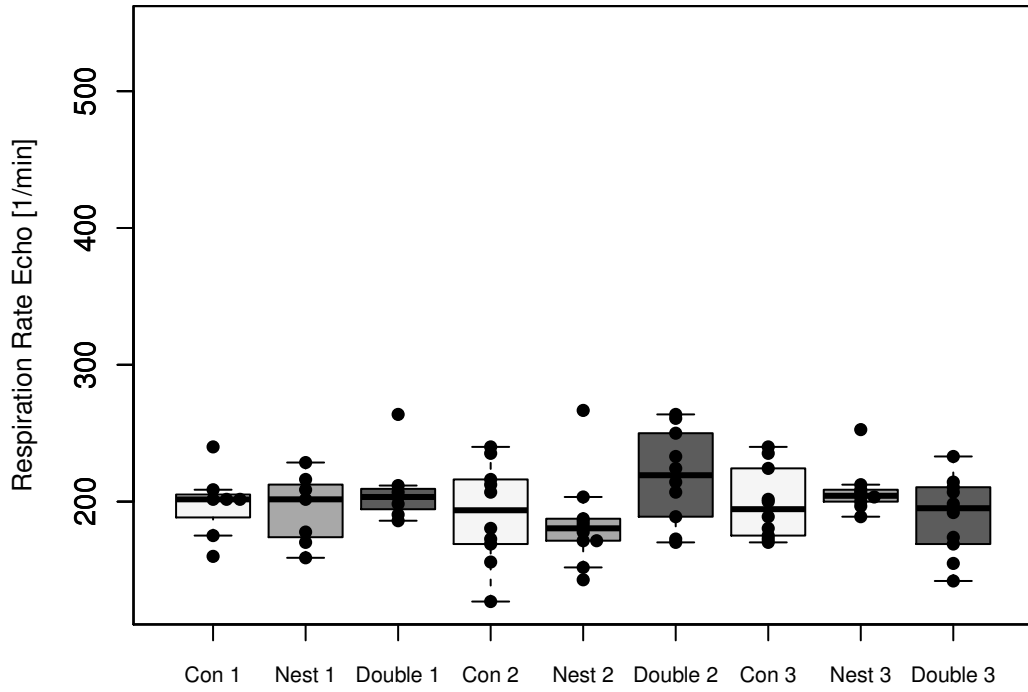**D2 female**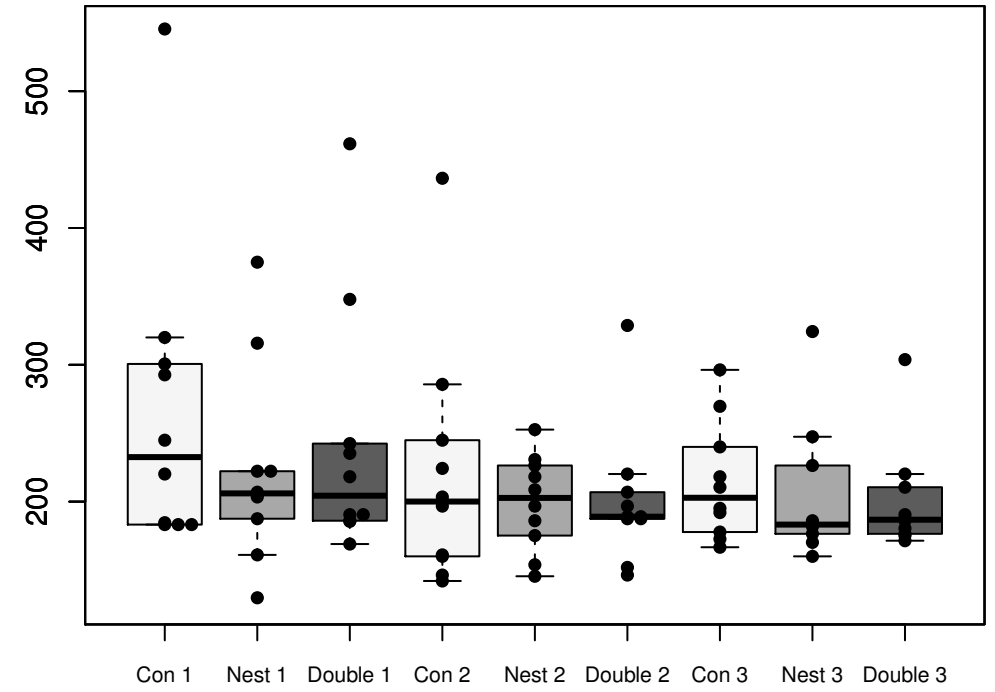**B6 male**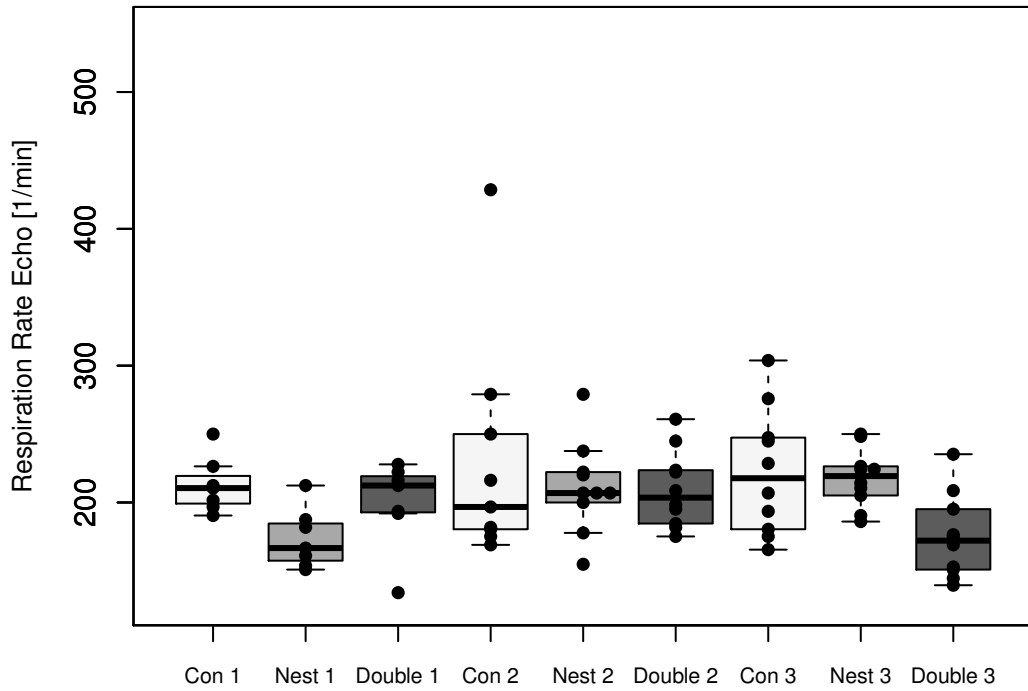**D2 male**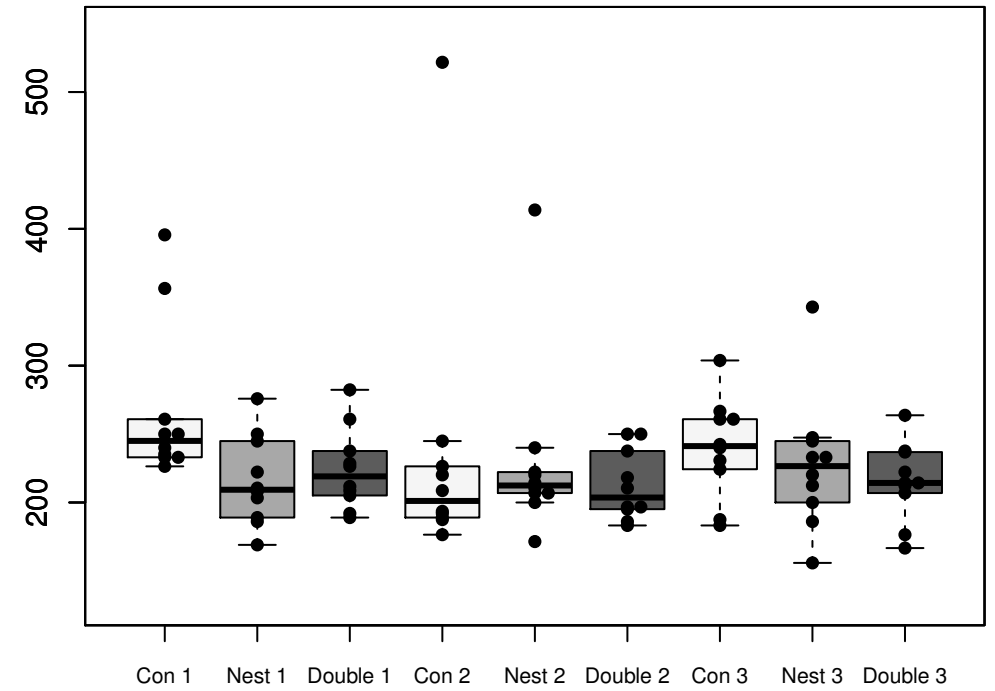

**B6 female**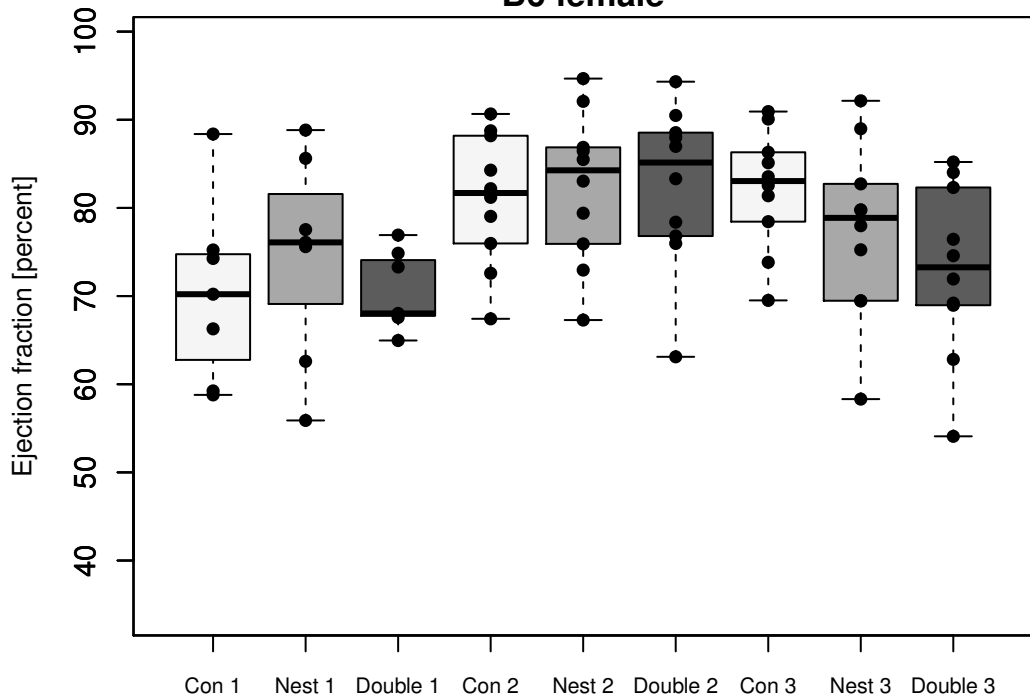**D2 female**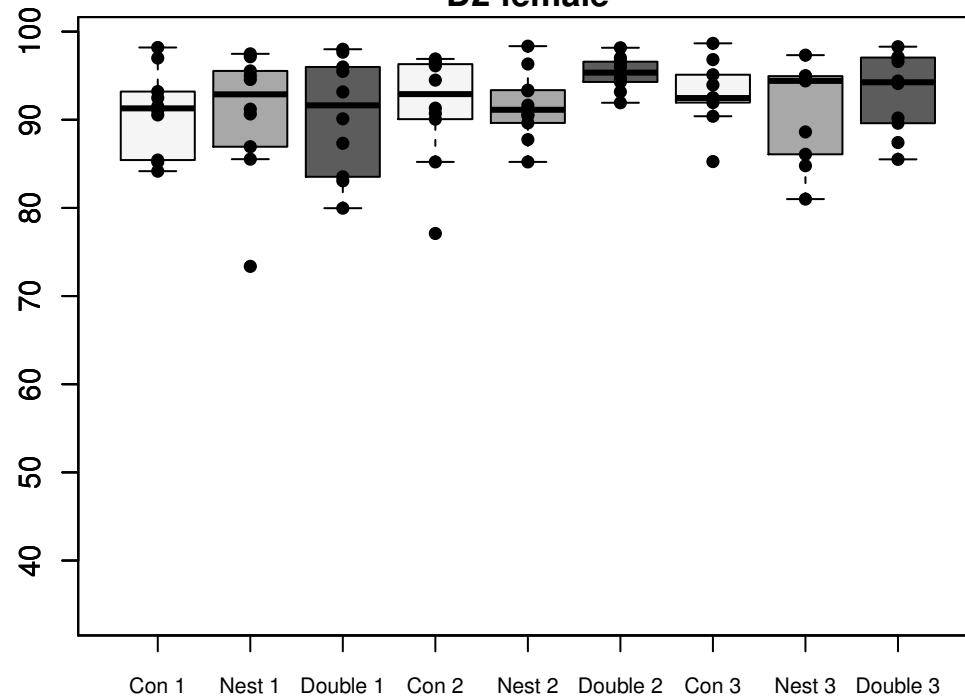**B6 male**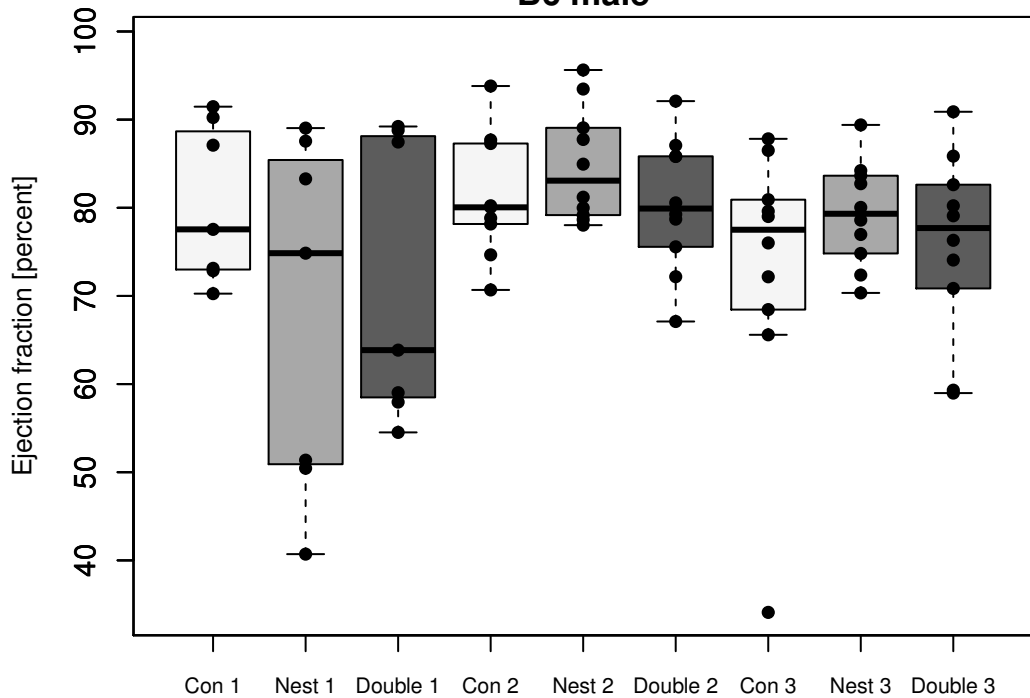**D2 male**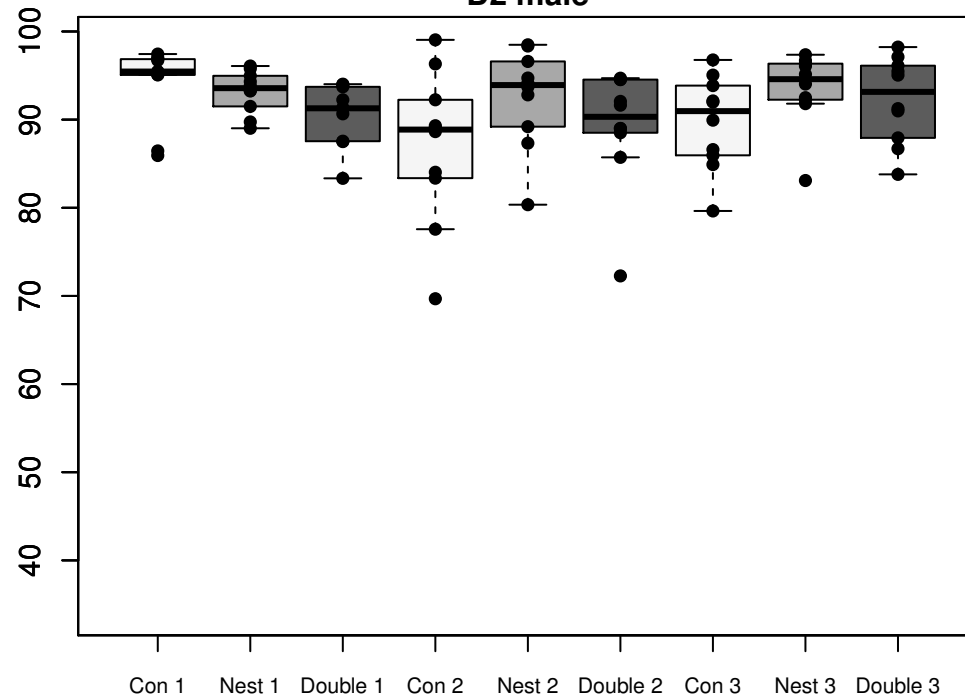

**B6 female**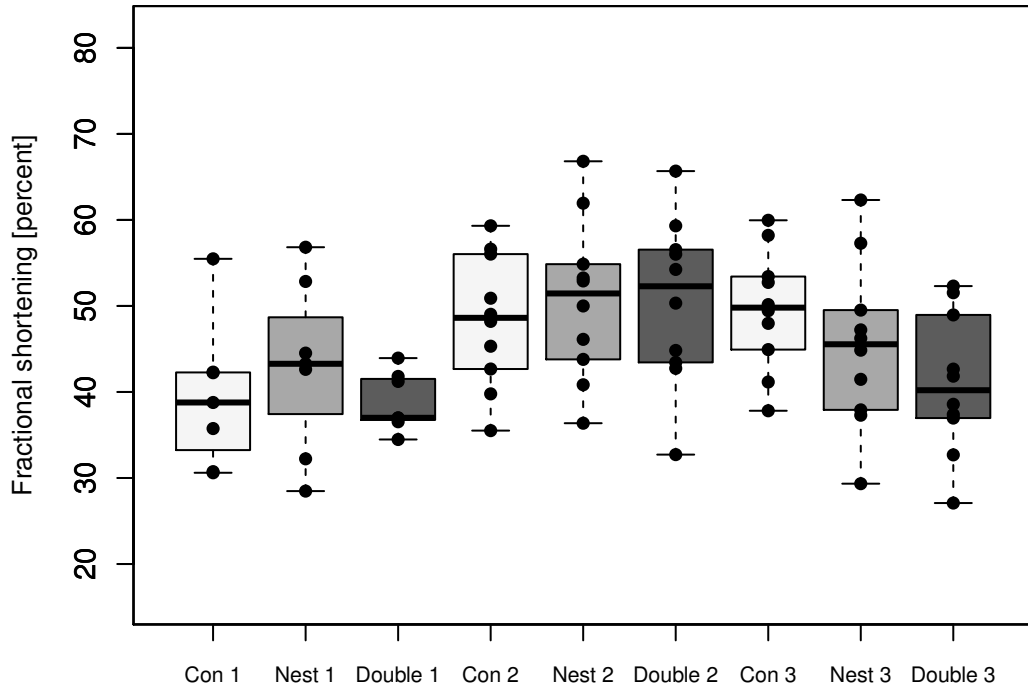**D2 female**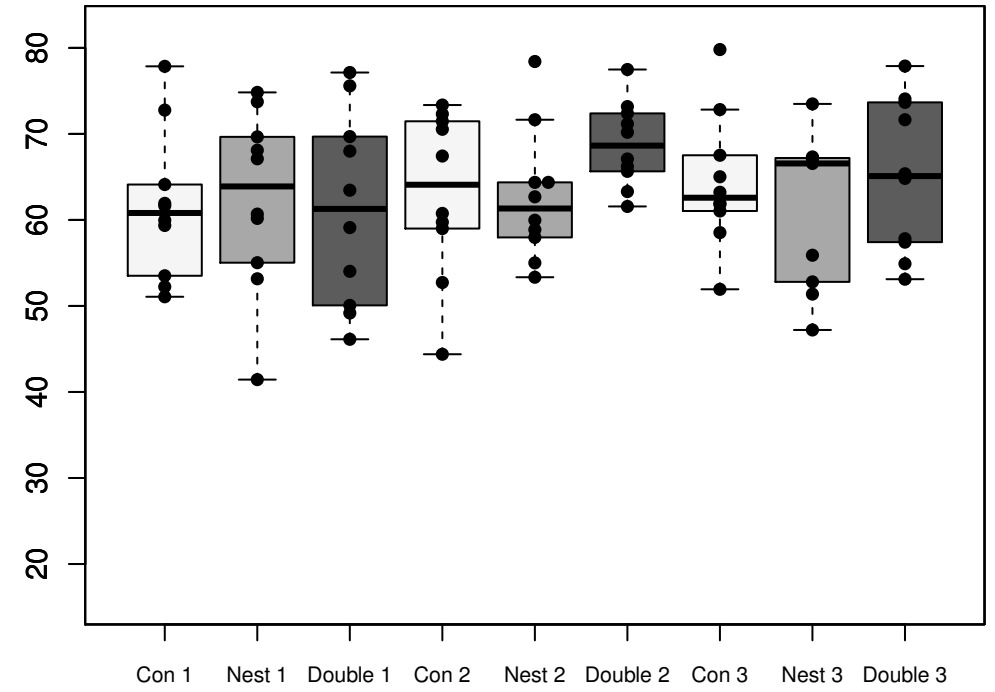**B6 male**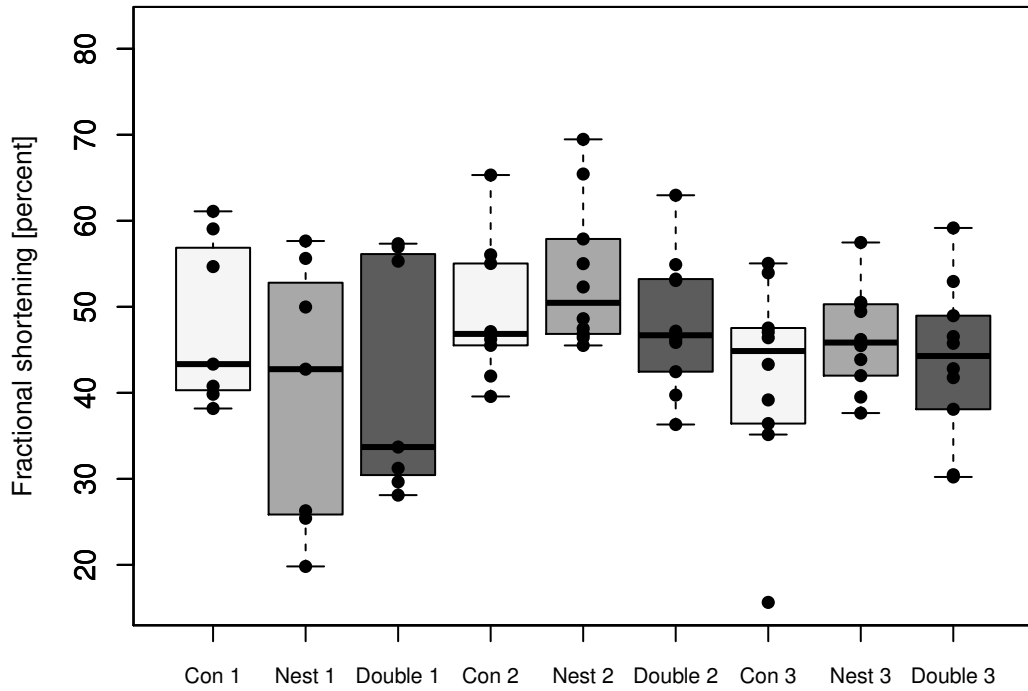**D2 male**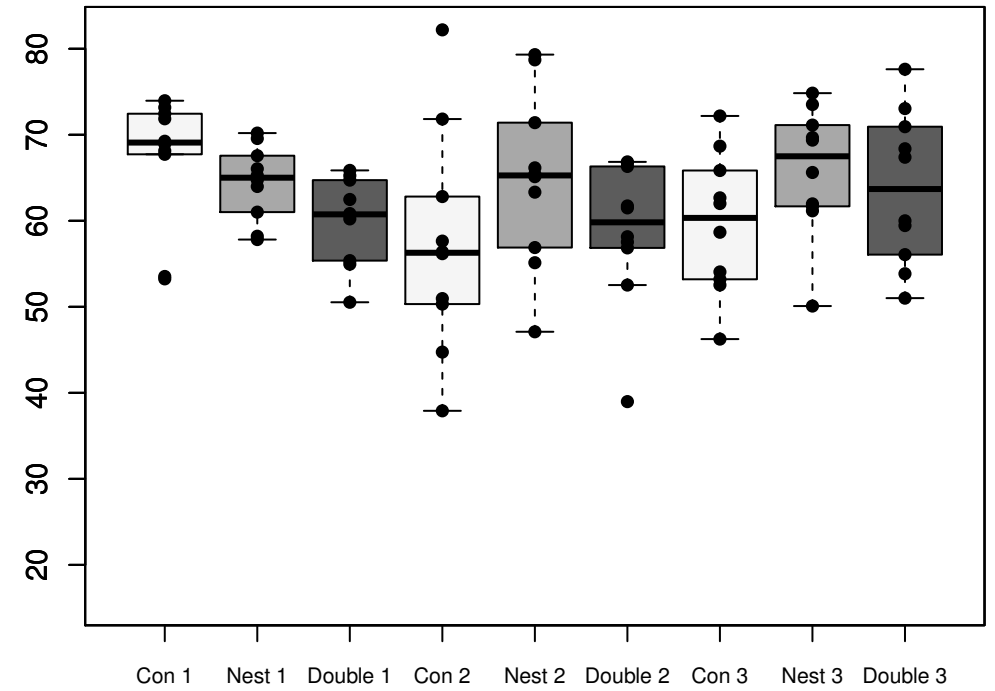

**B6 female**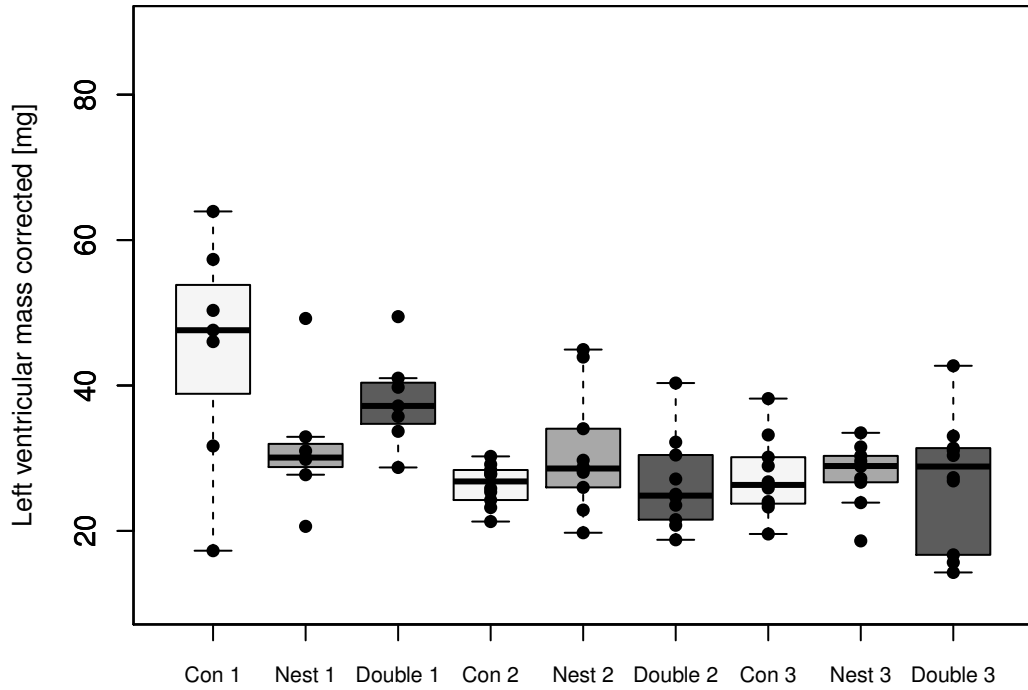**D2 female**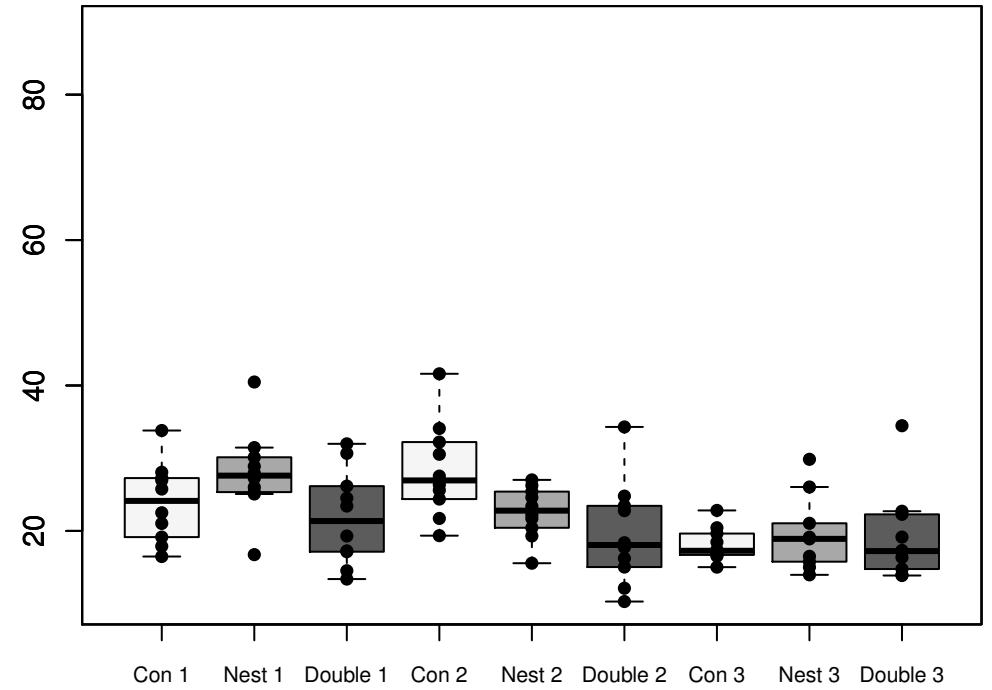**B6 male**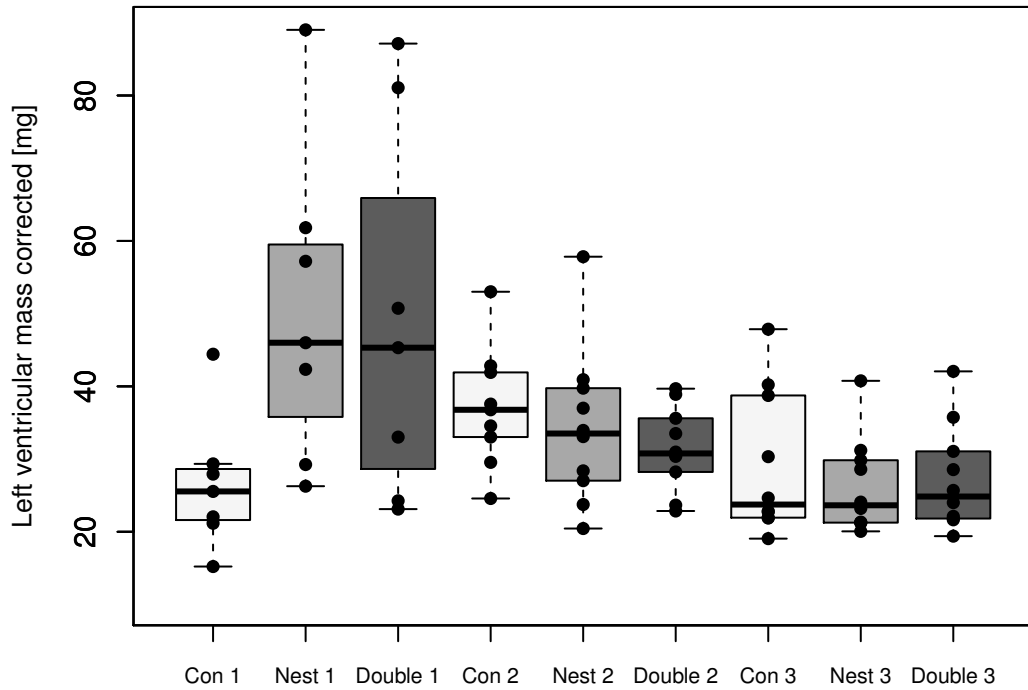**D2 male**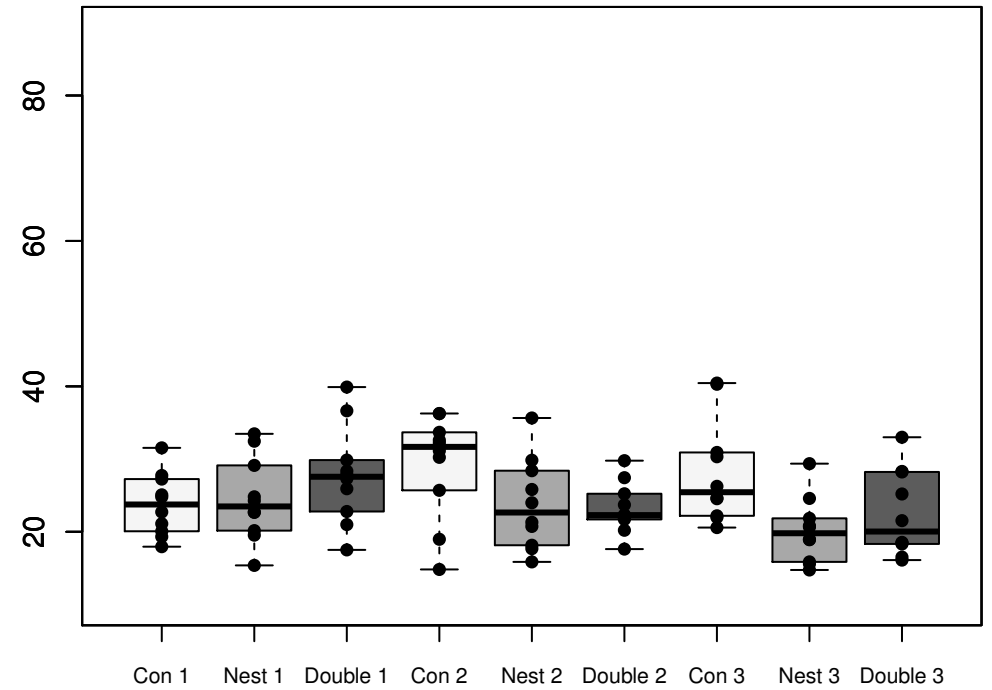

**B6 female**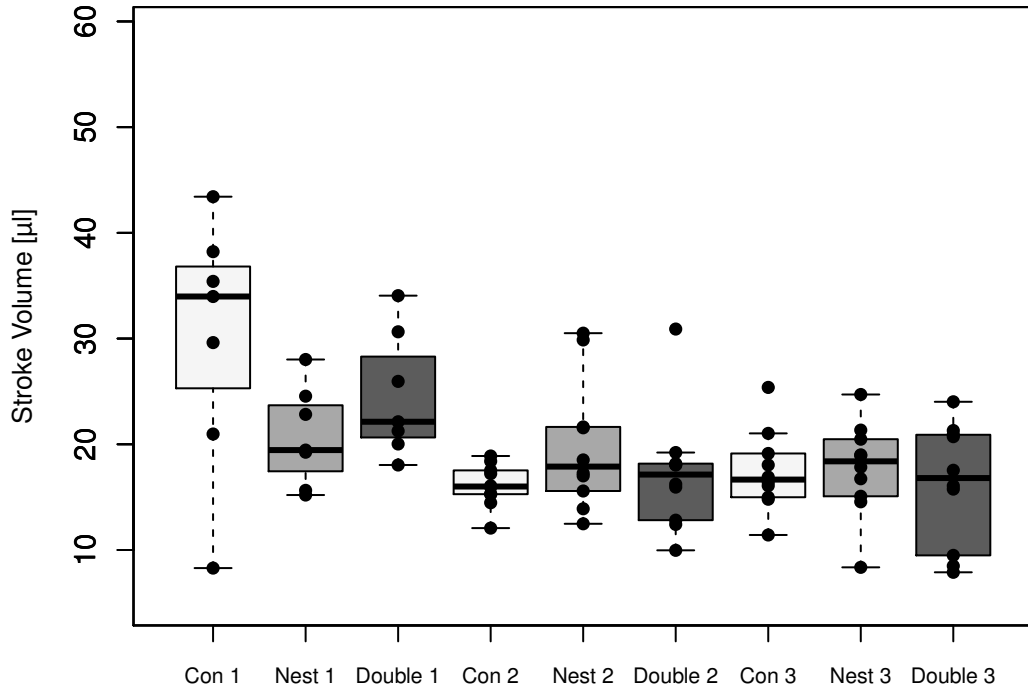**D2 female**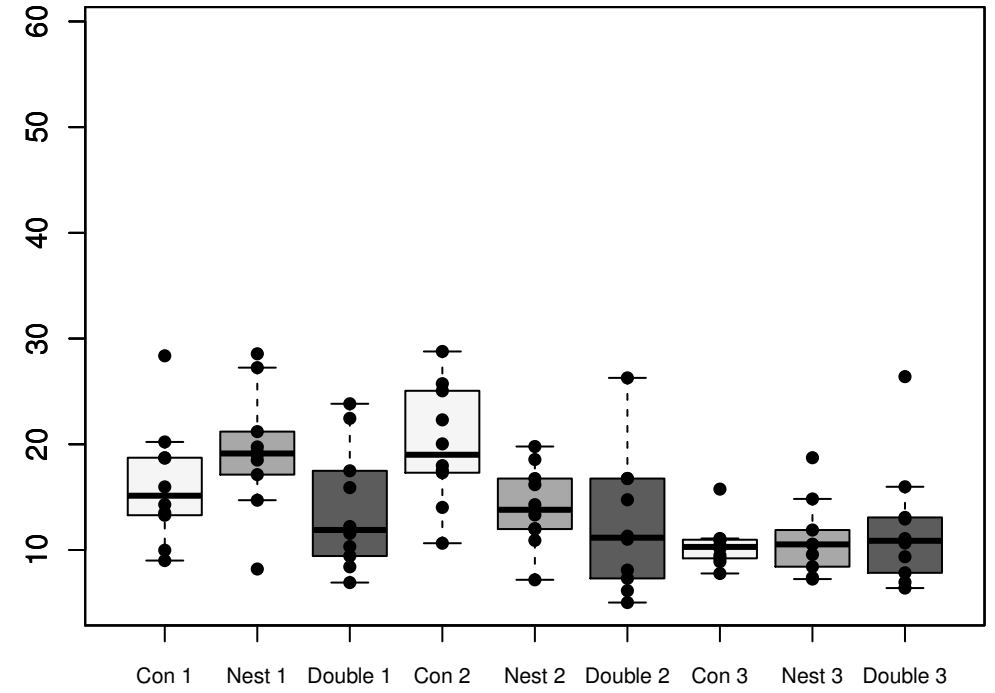**B6 male**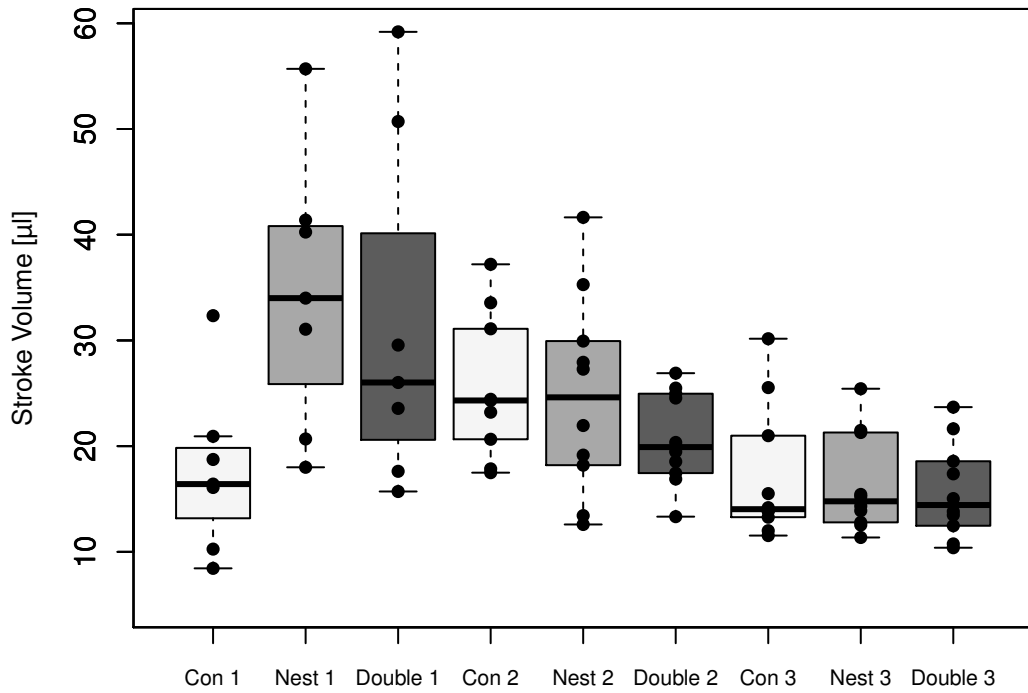**D2 male**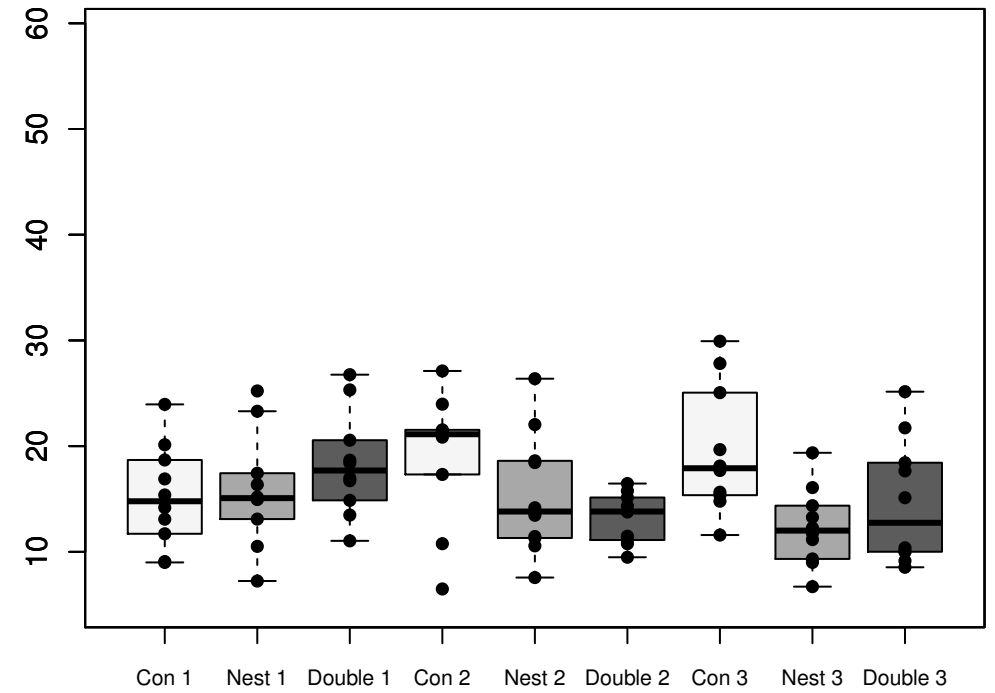



**B6 female**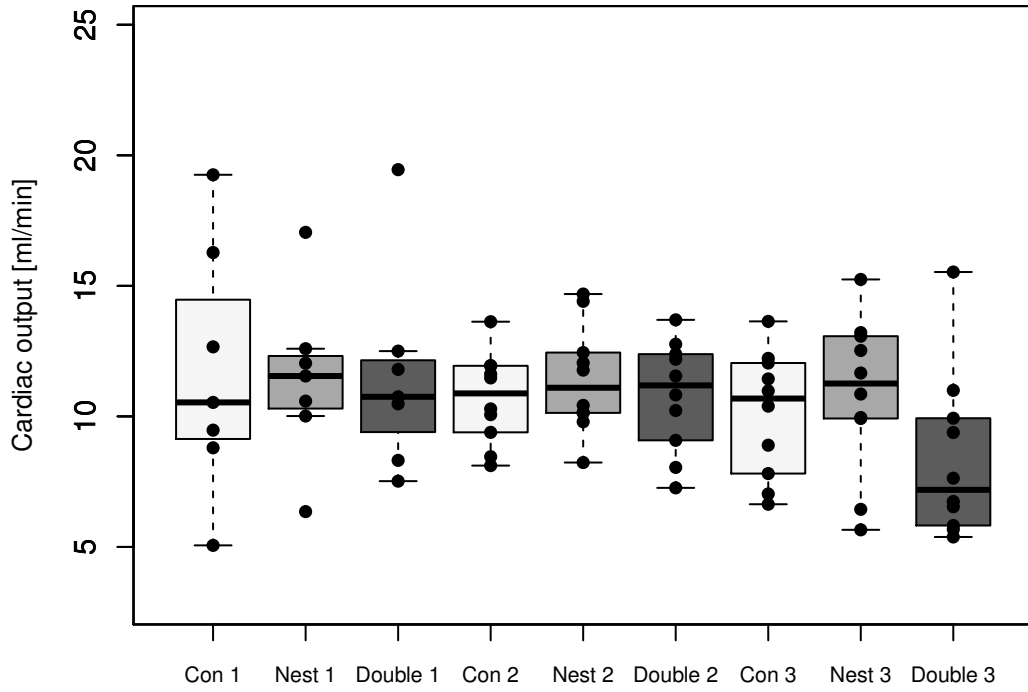**D2 female**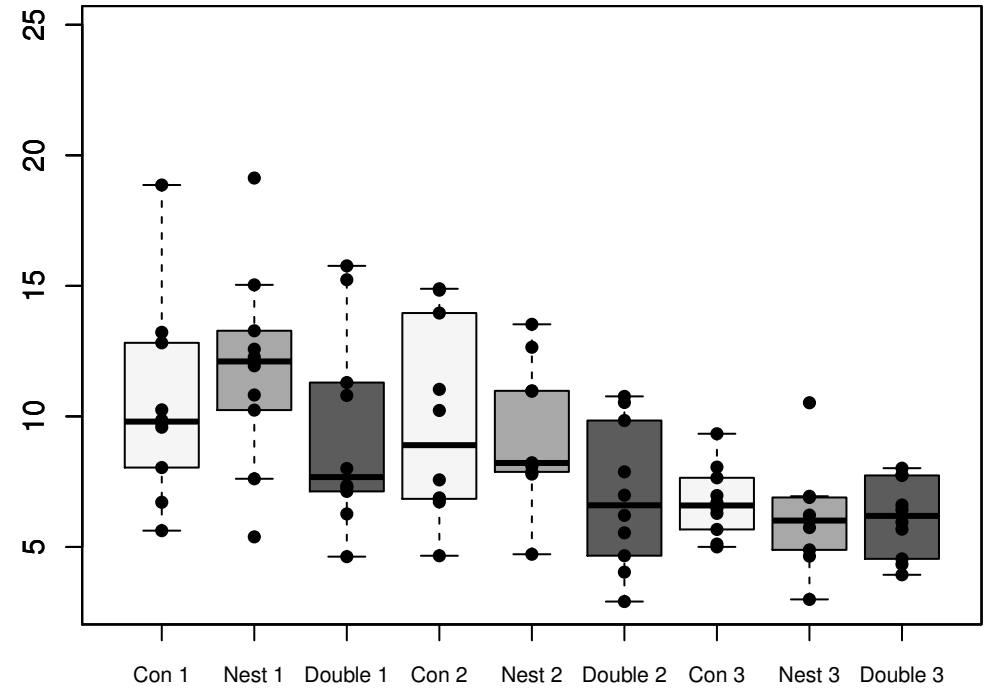**B6 male**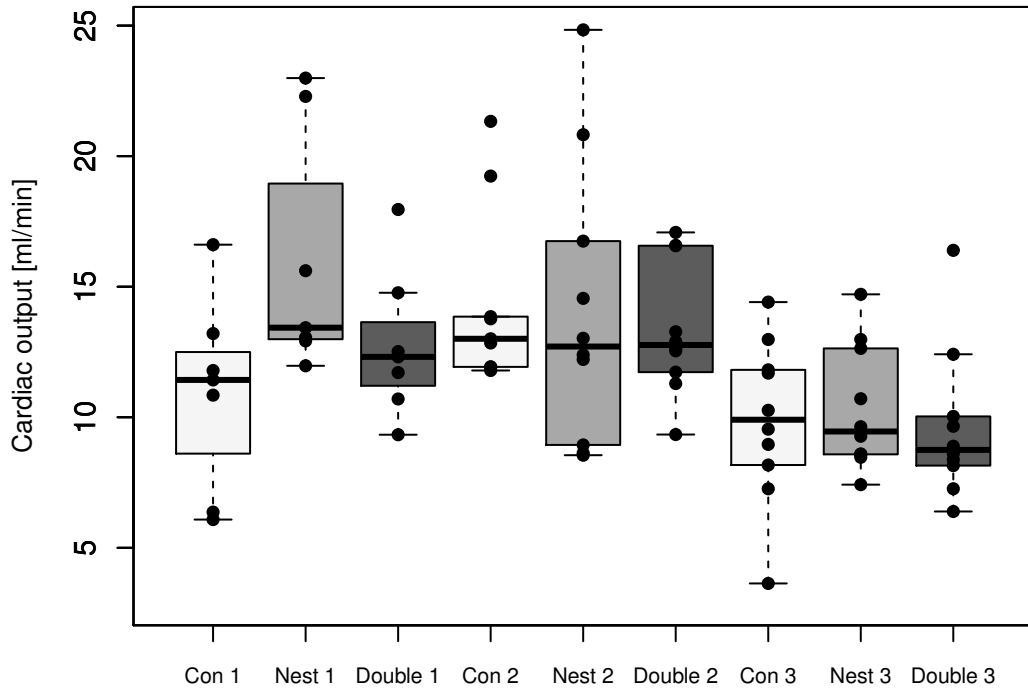**D2 male**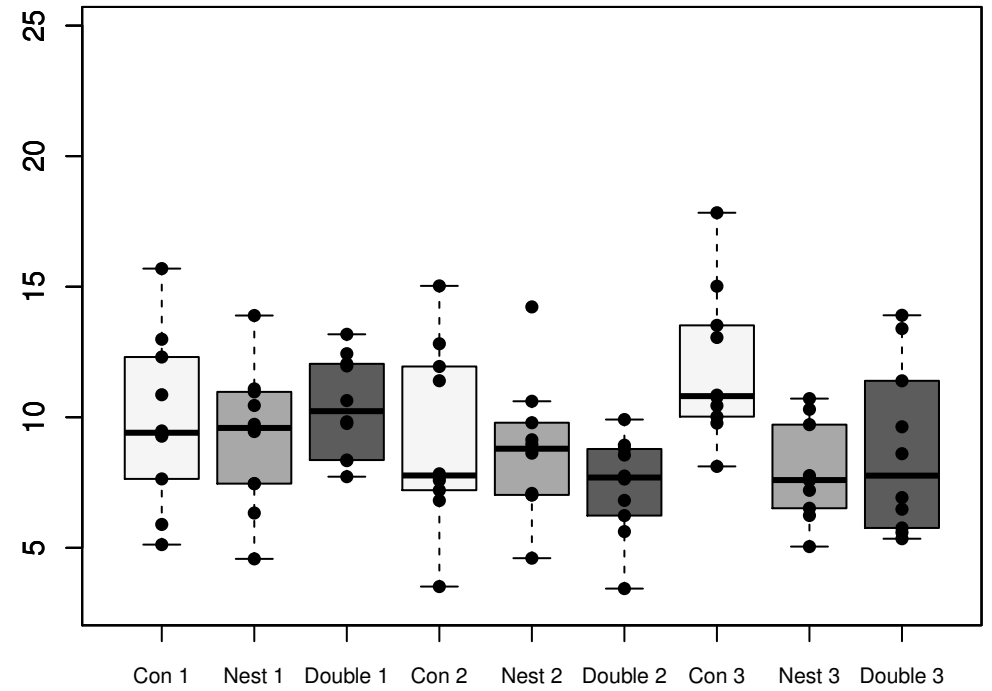

**B6 female**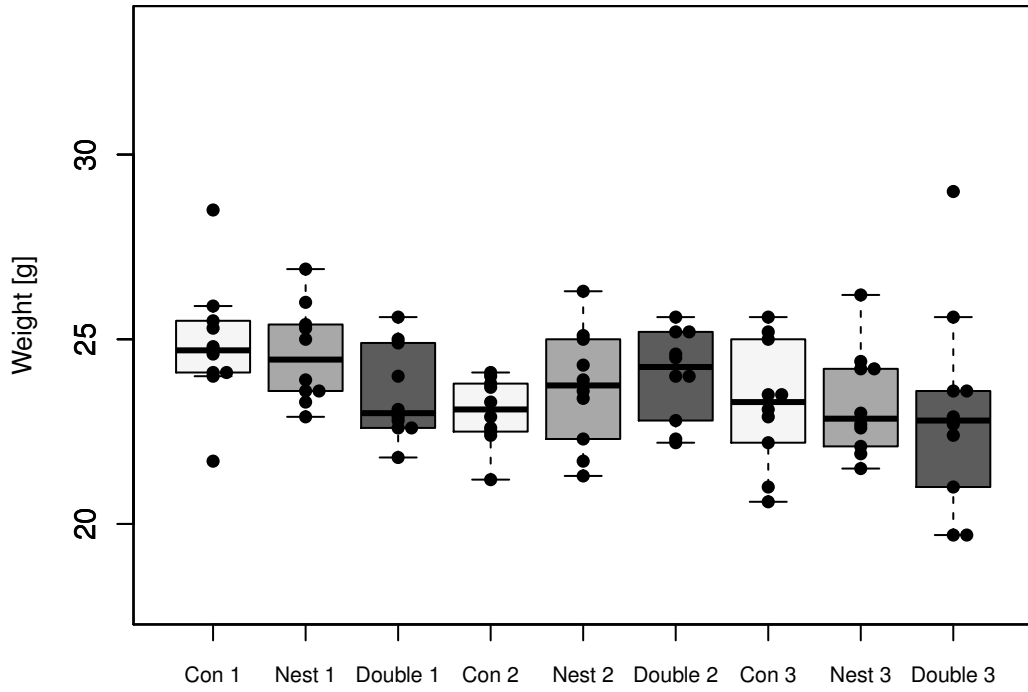**D2 female**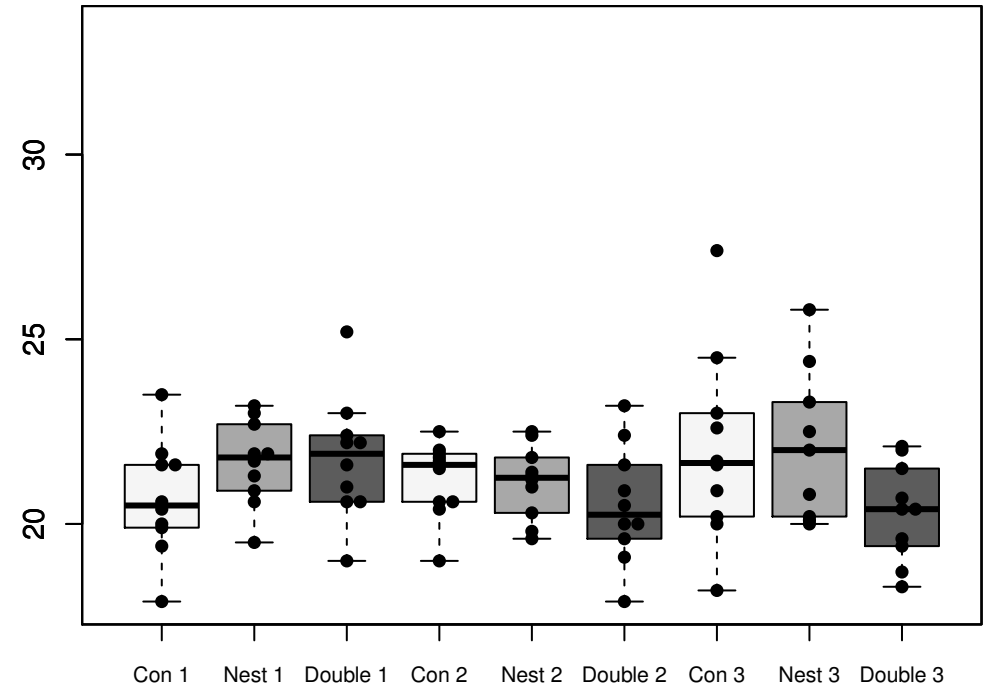**B6 male**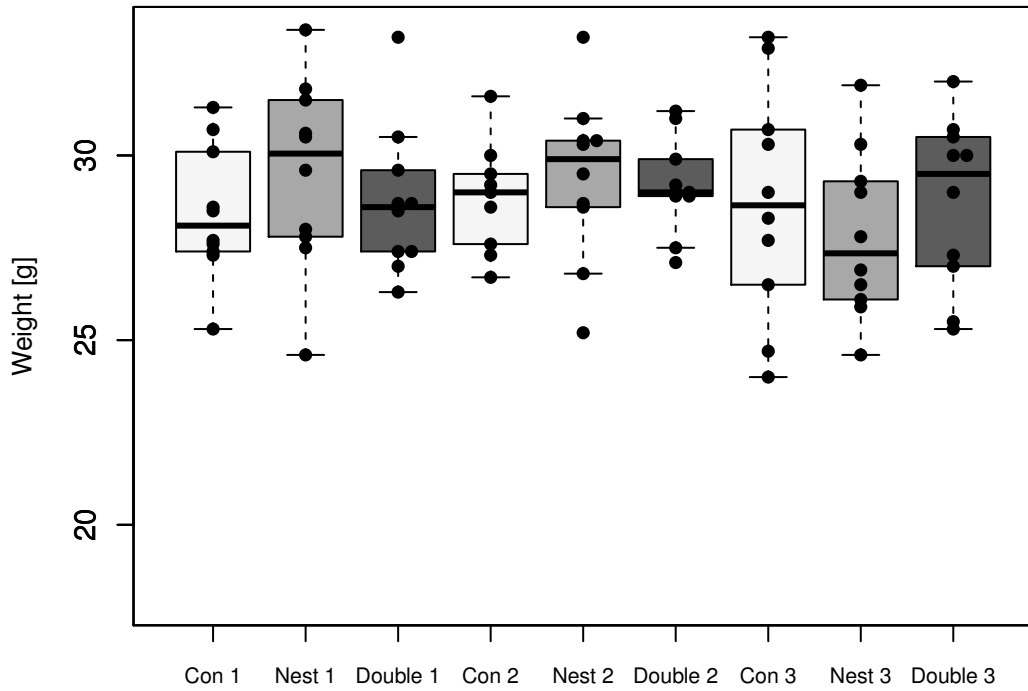**D2 male**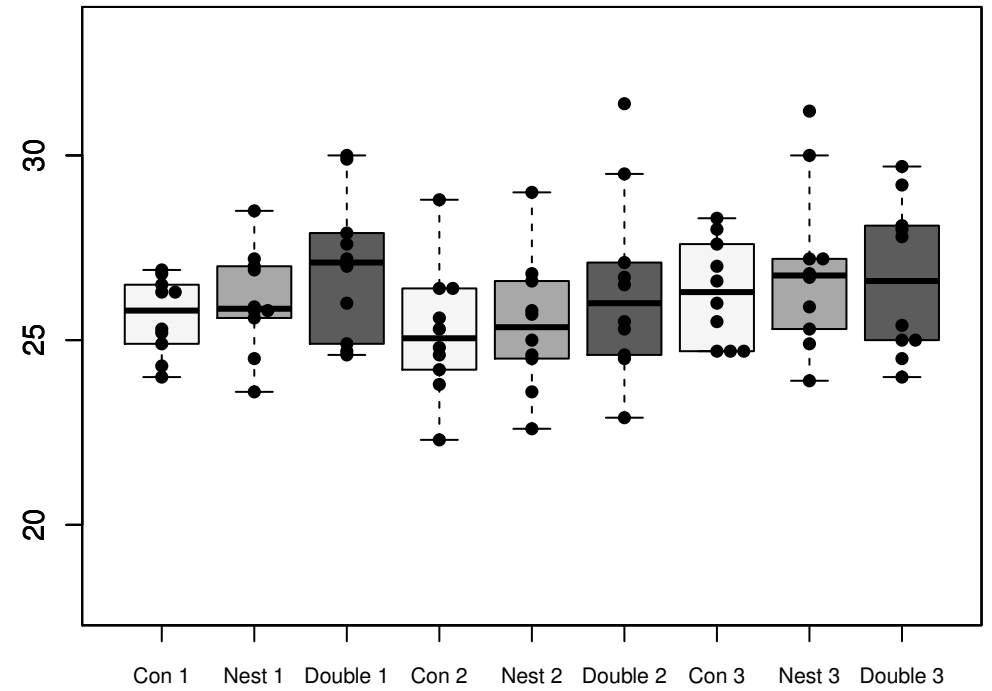

**B6 female**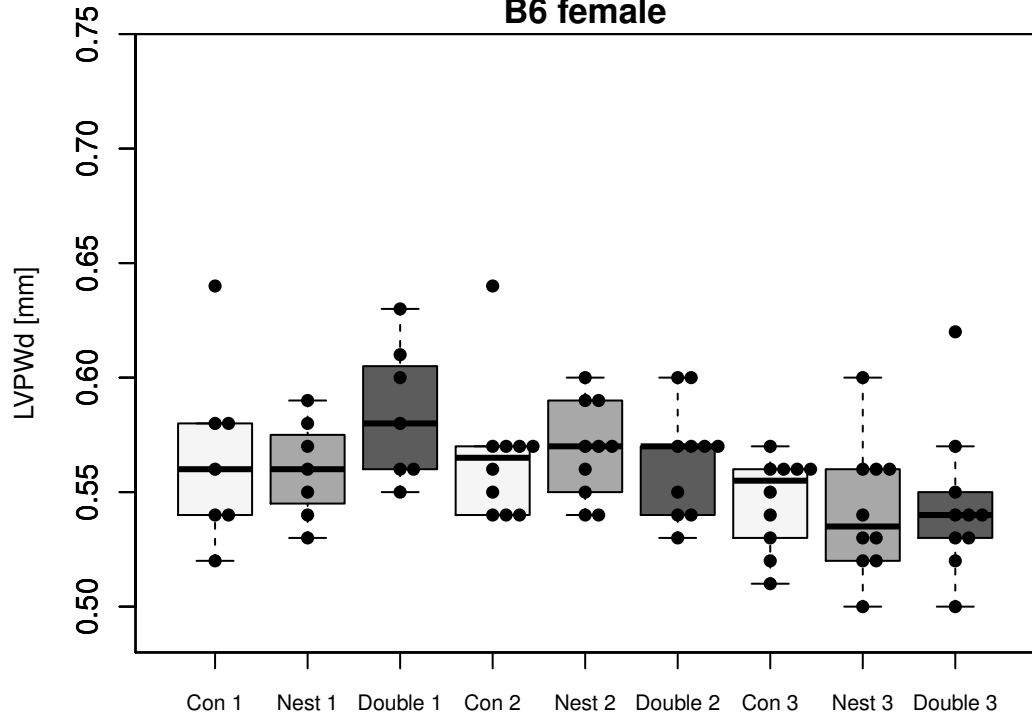**D2 female**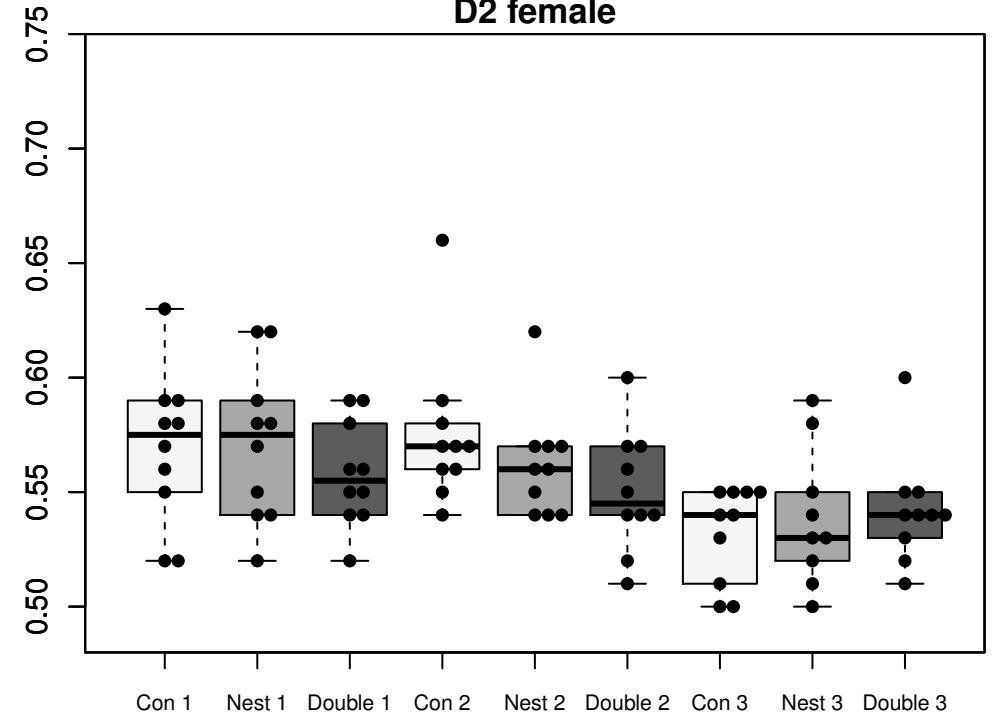**B6 male**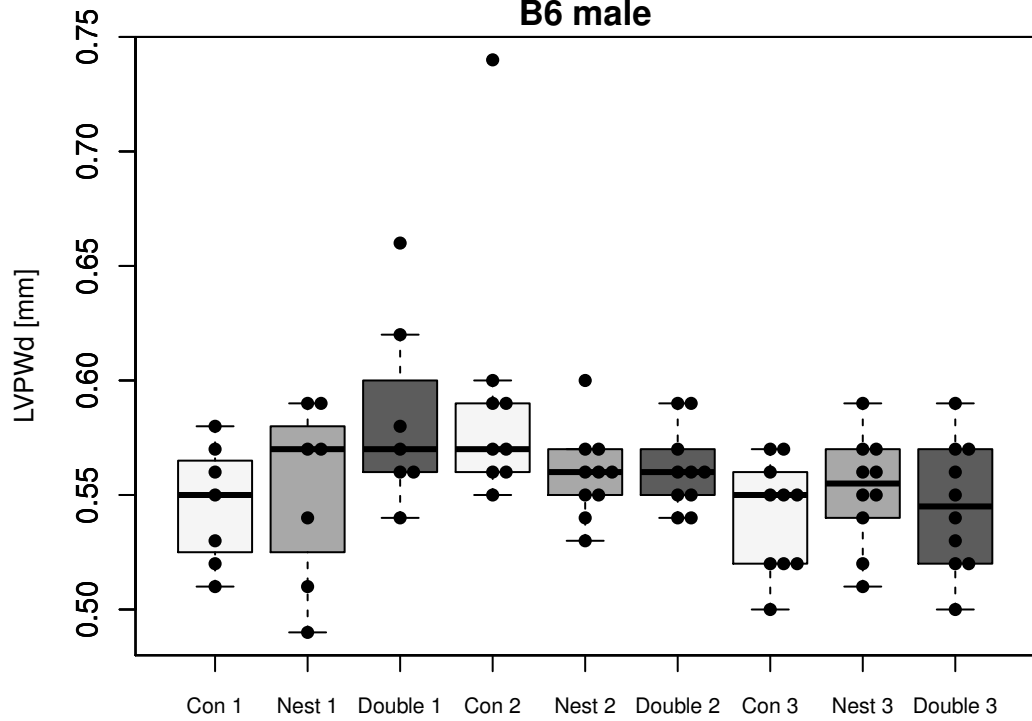**D2 male**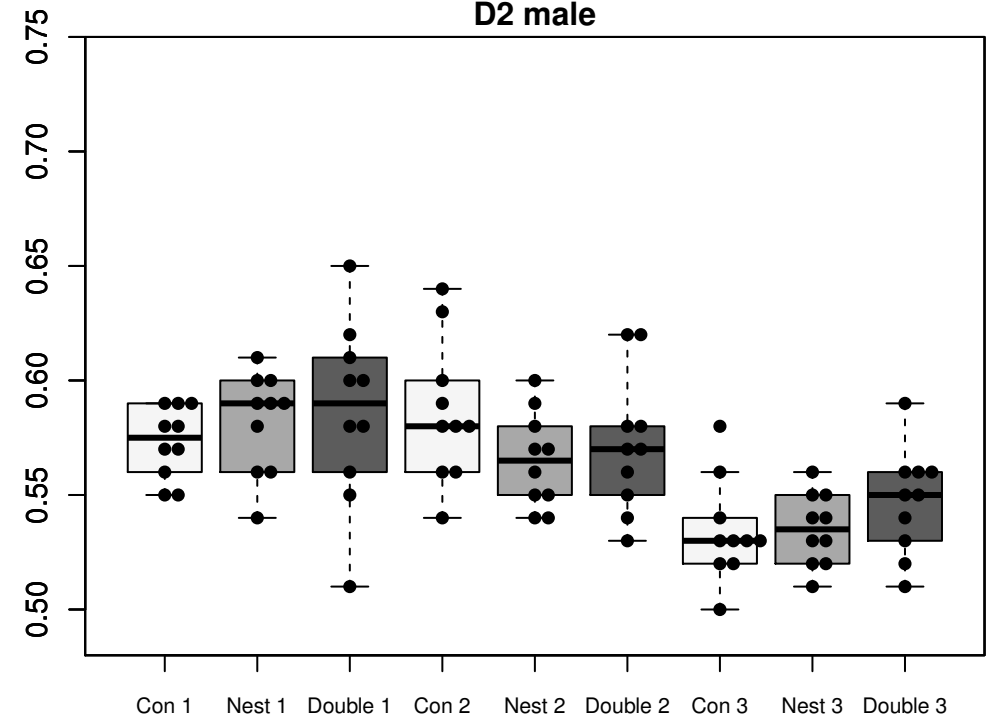

**B6 female**

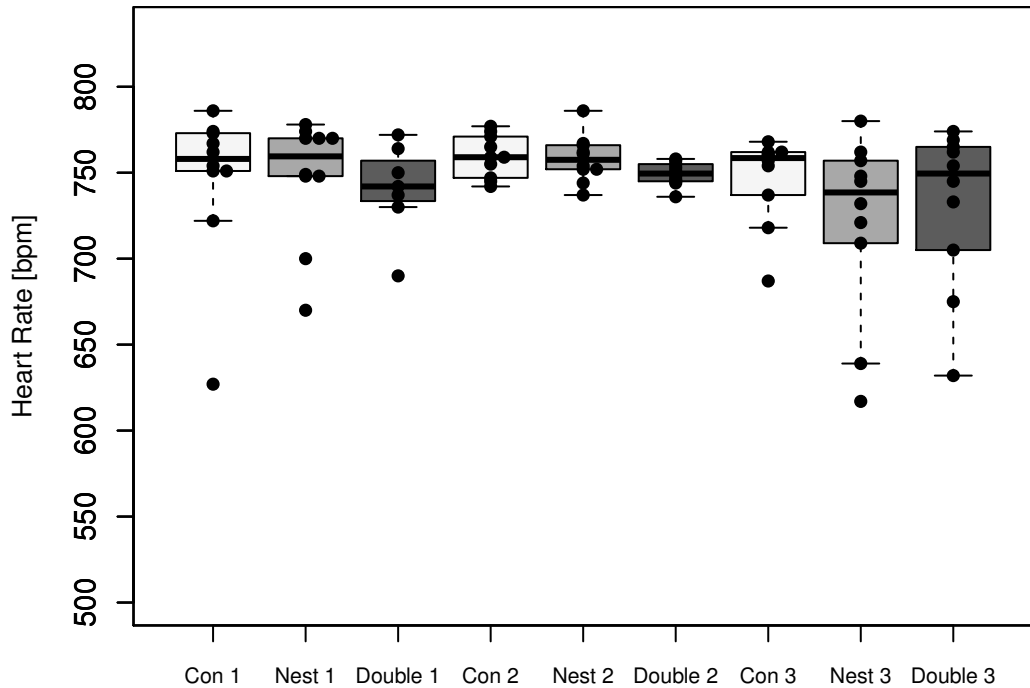

**D2 female**

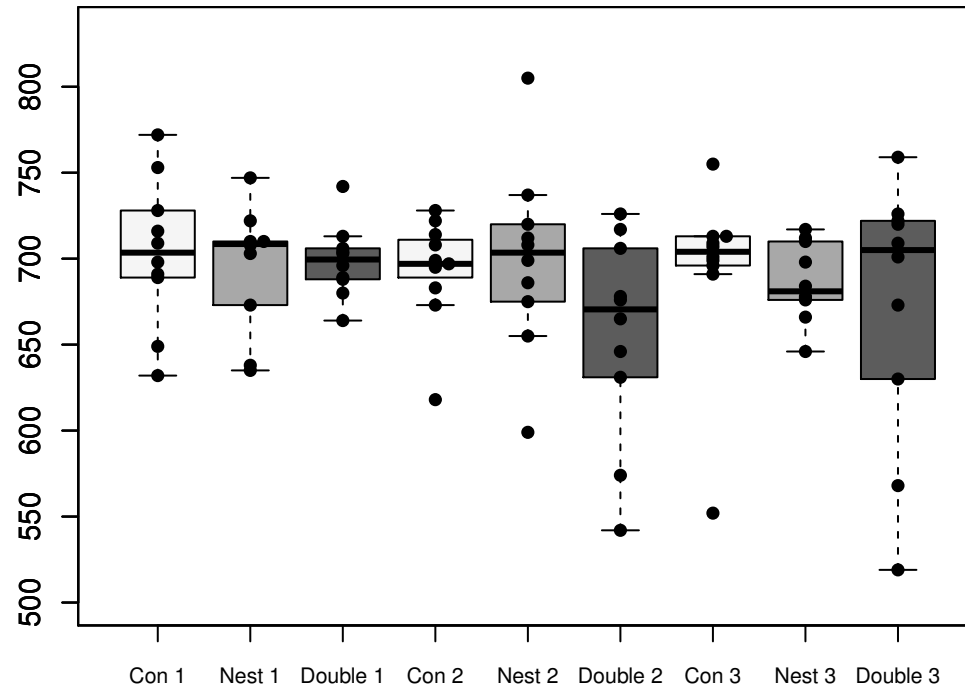

**B6 male**

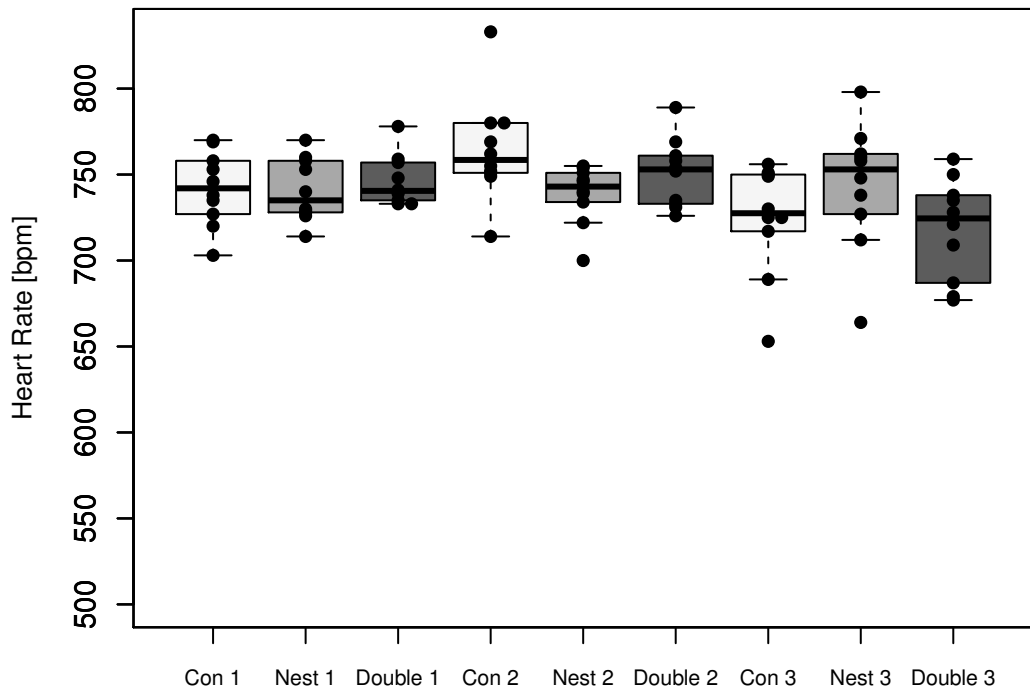

**D2 male**

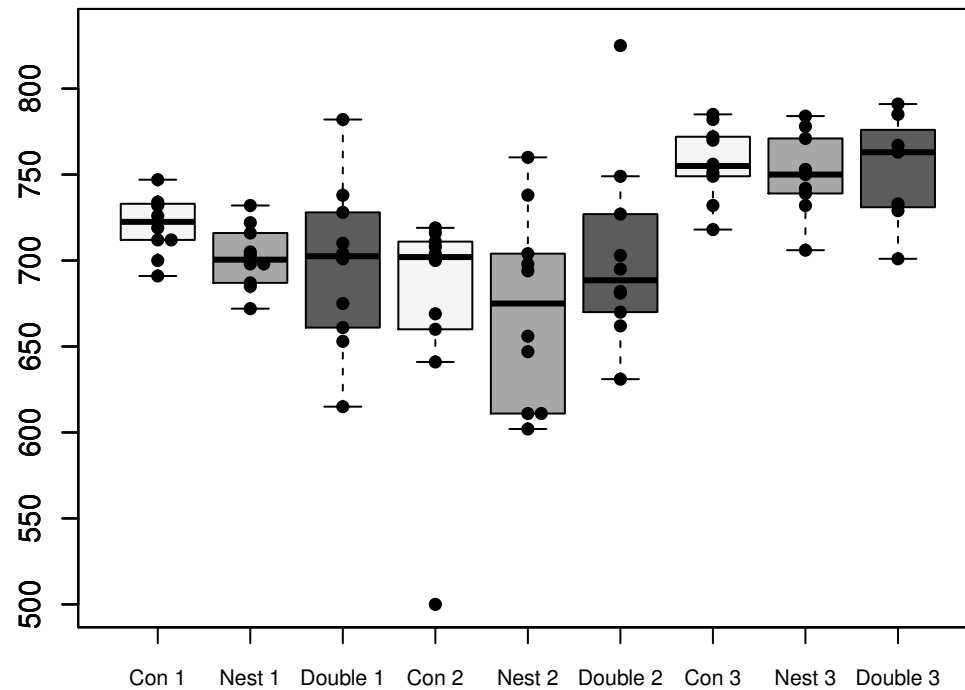

**B6 female**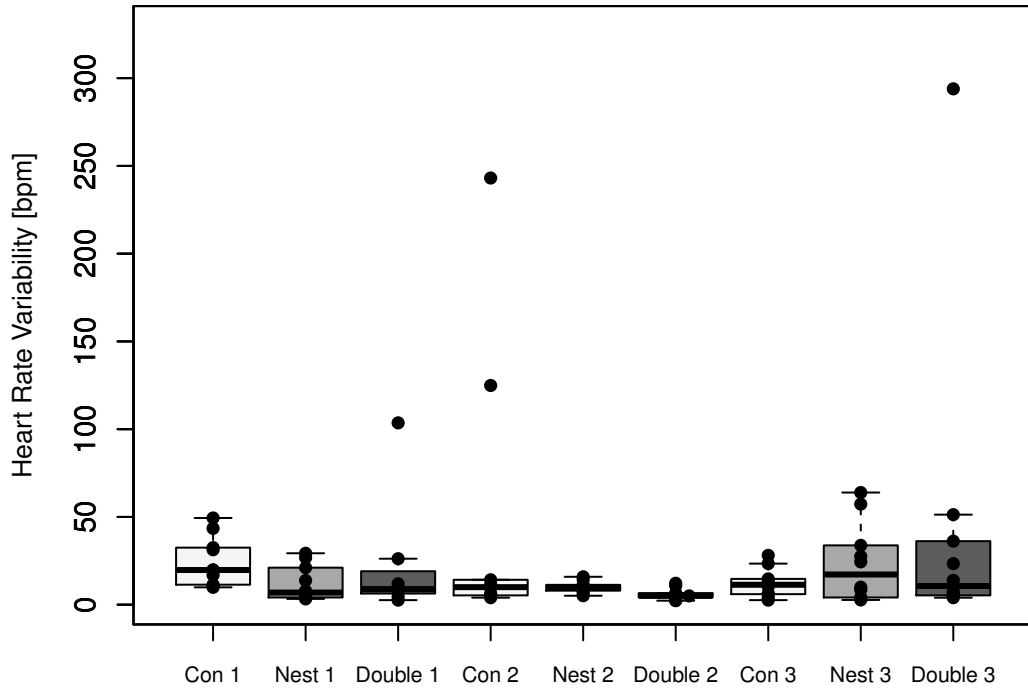**D2 female**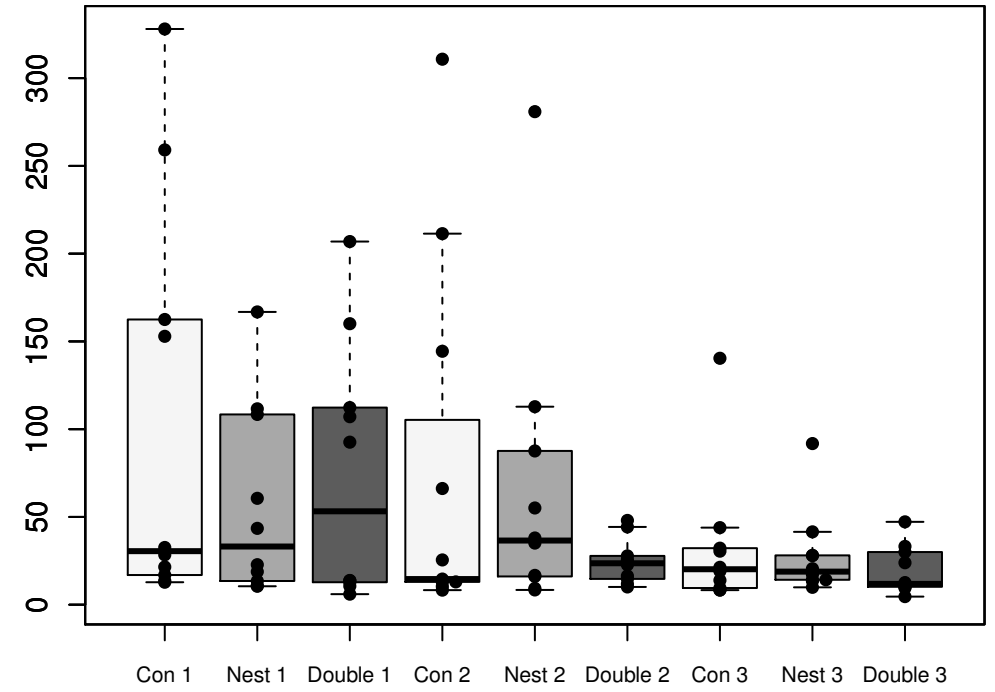**B6 male**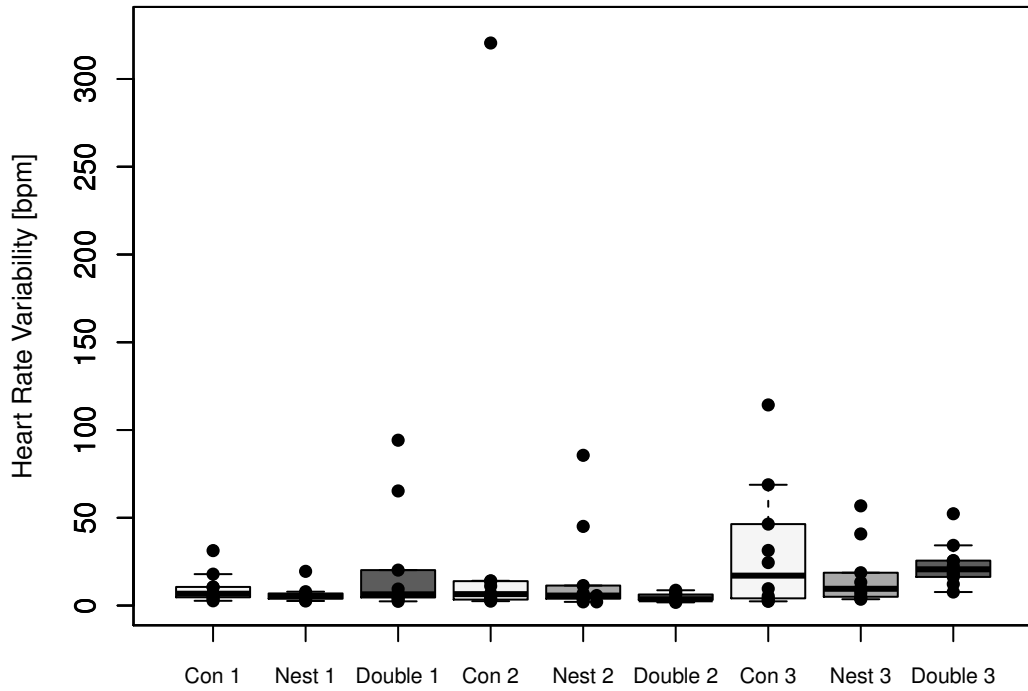**D2 male**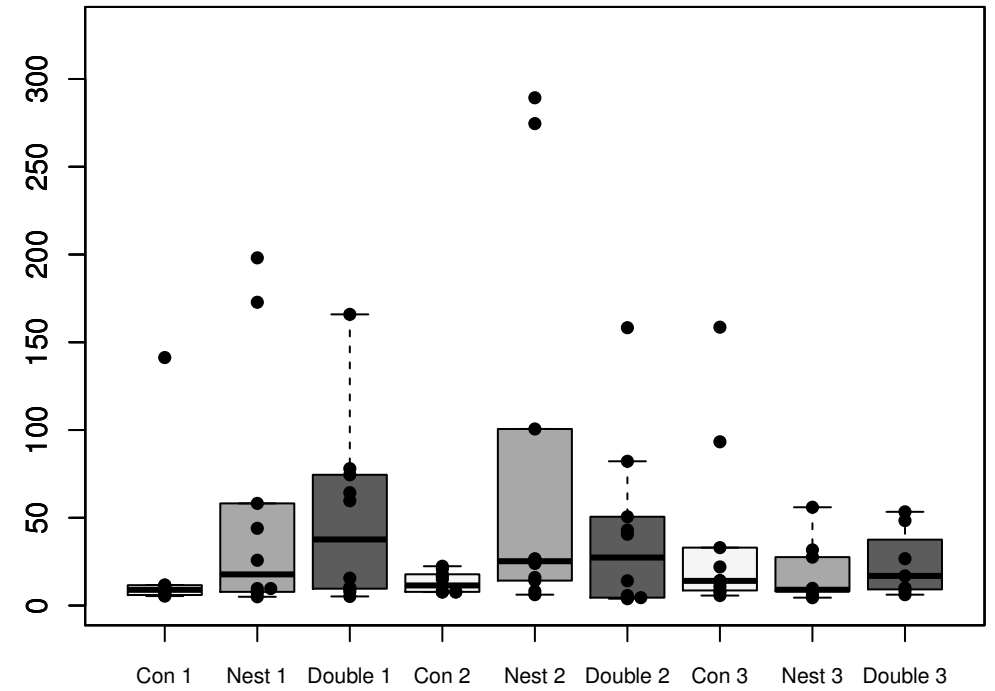

**B6 female**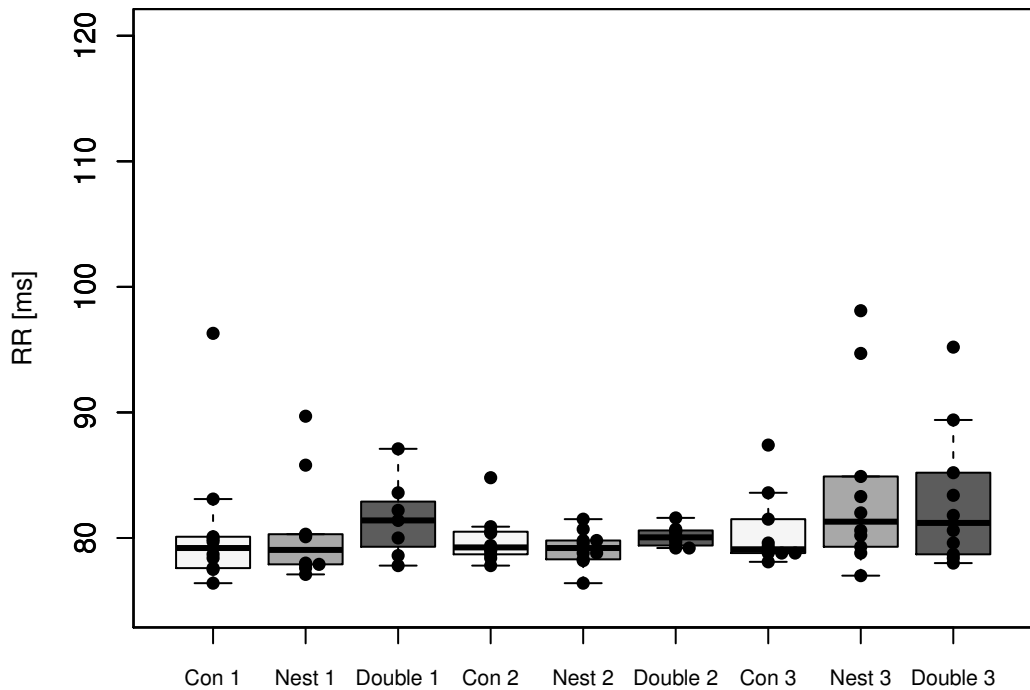**D2 female**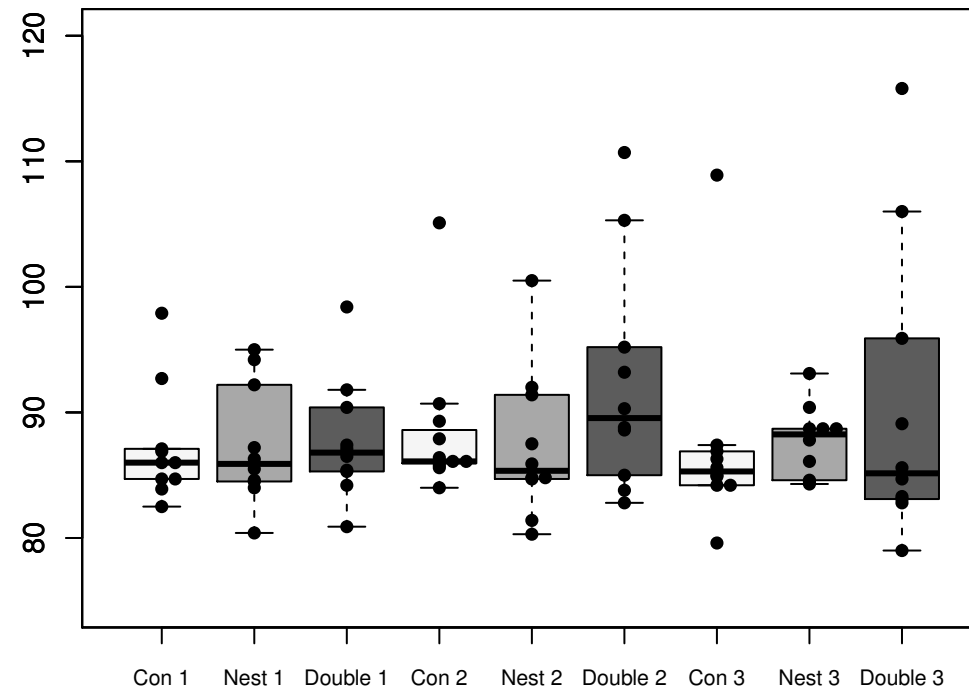**B6 male**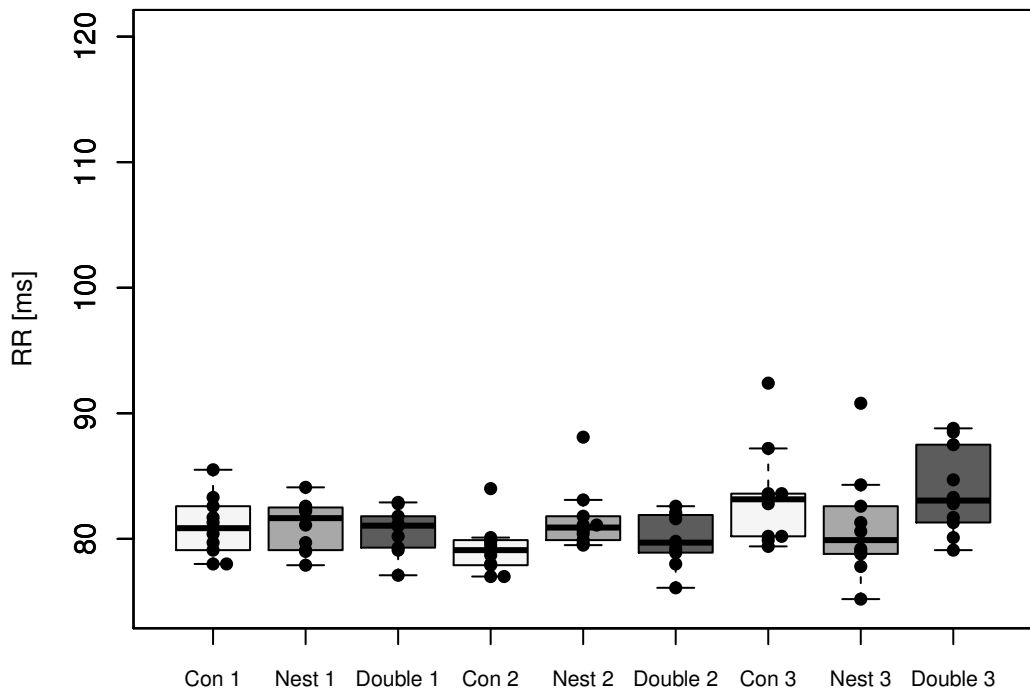**D2 male**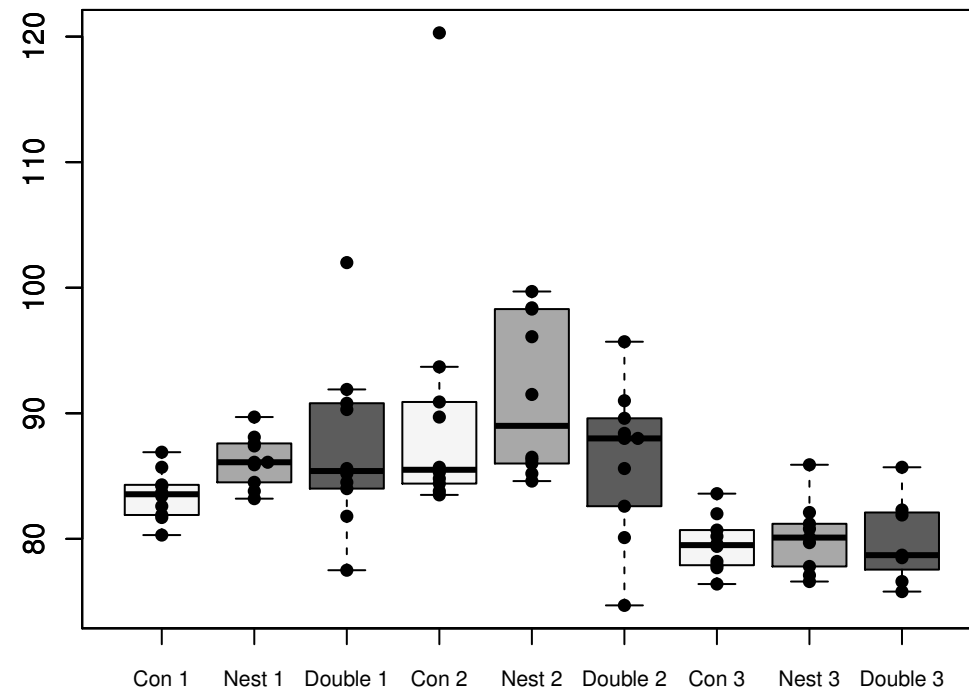

**B6 female**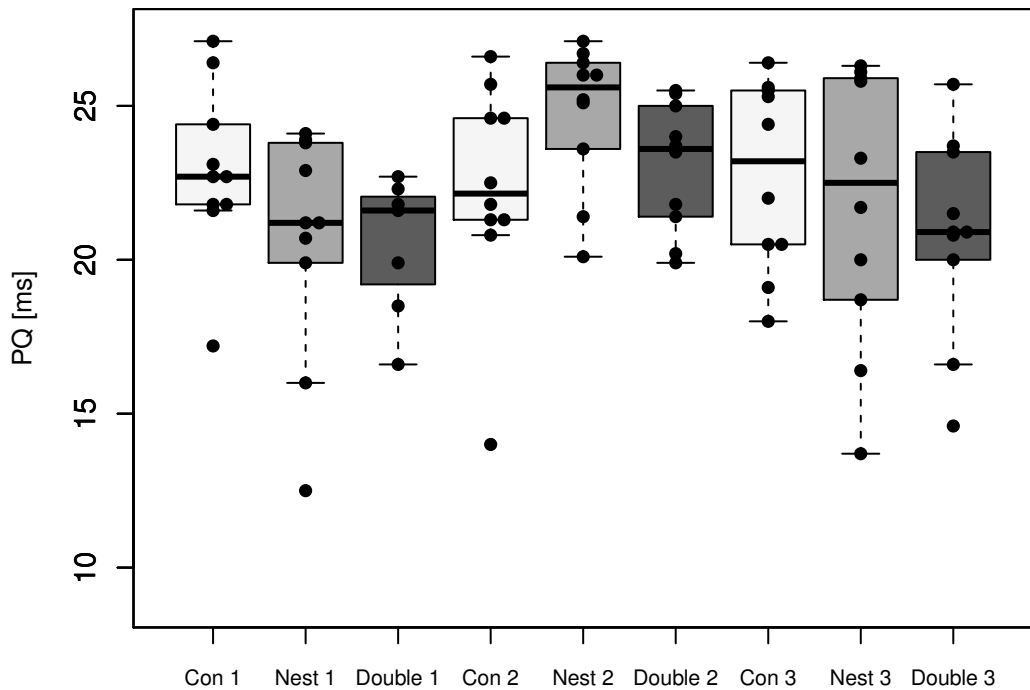**D2 female**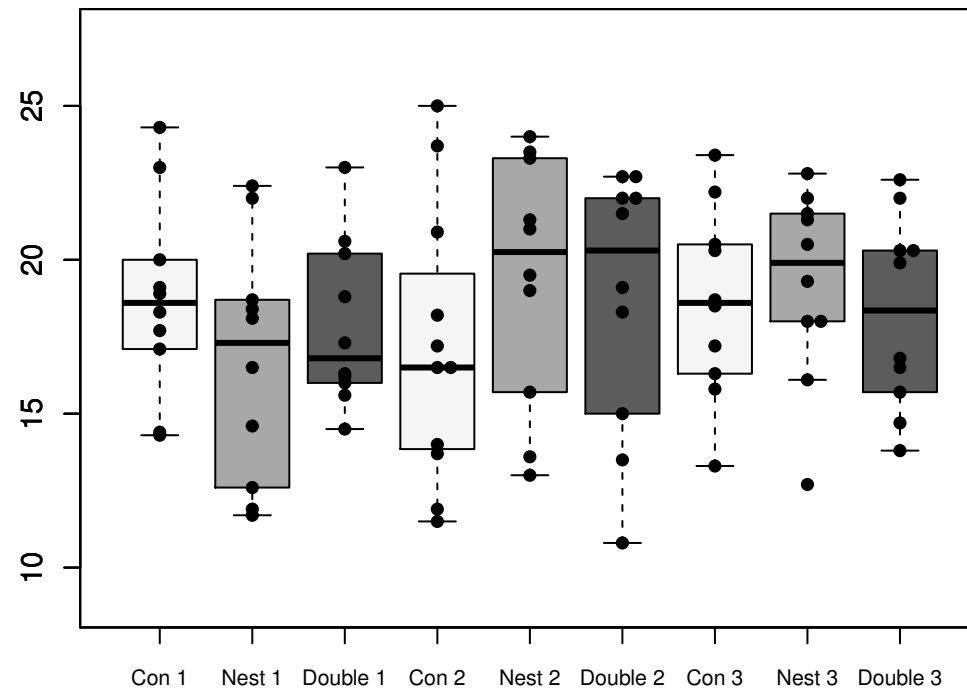**B6 male**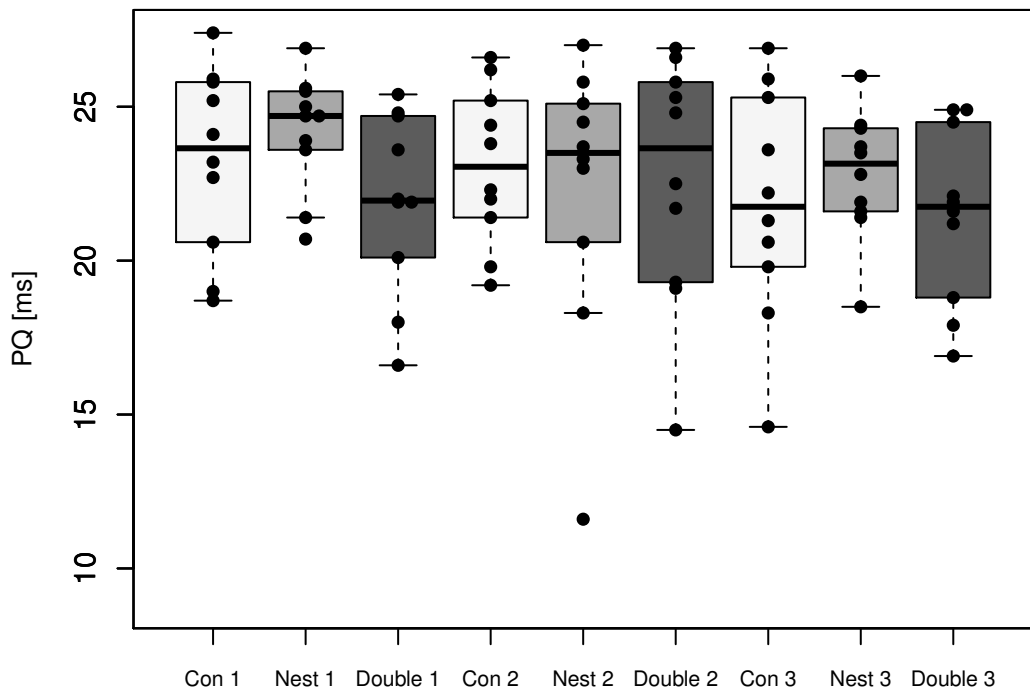**D2 male**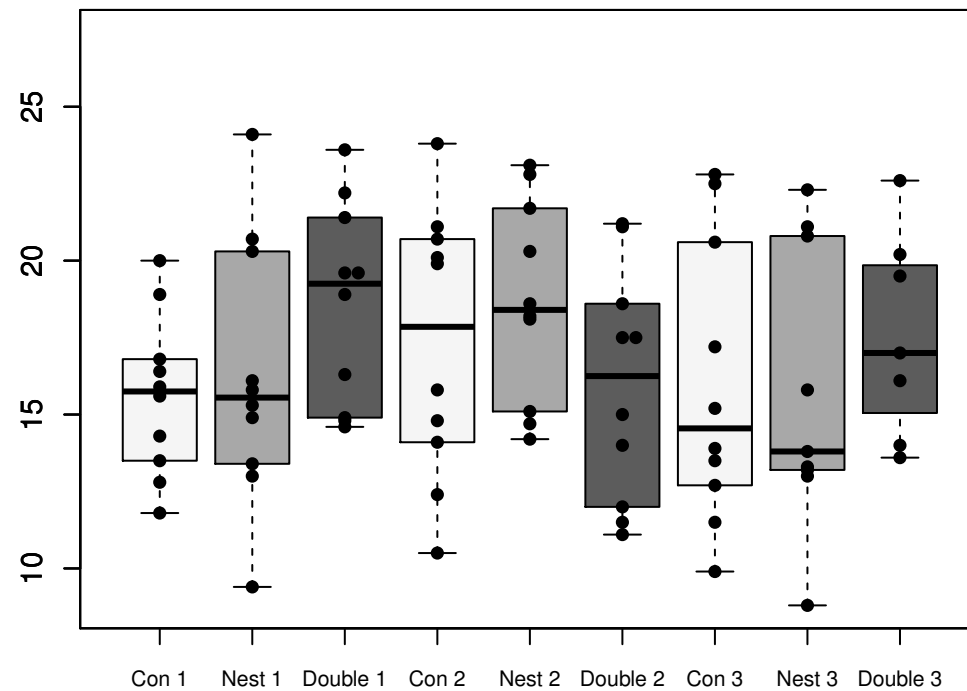

**B6 female**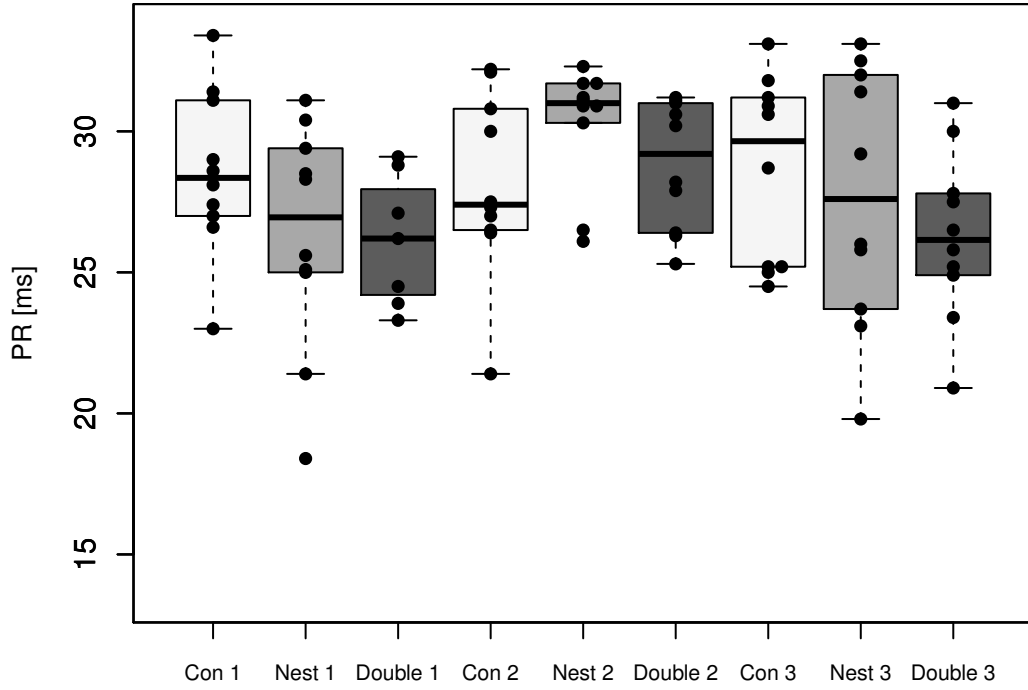**D2 female**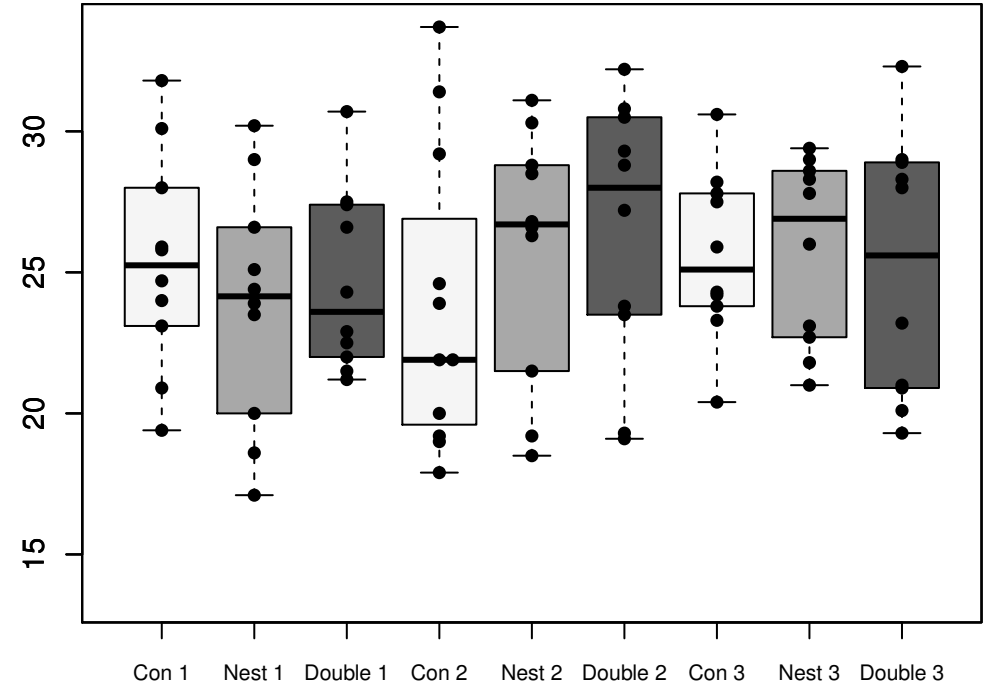**B6 male**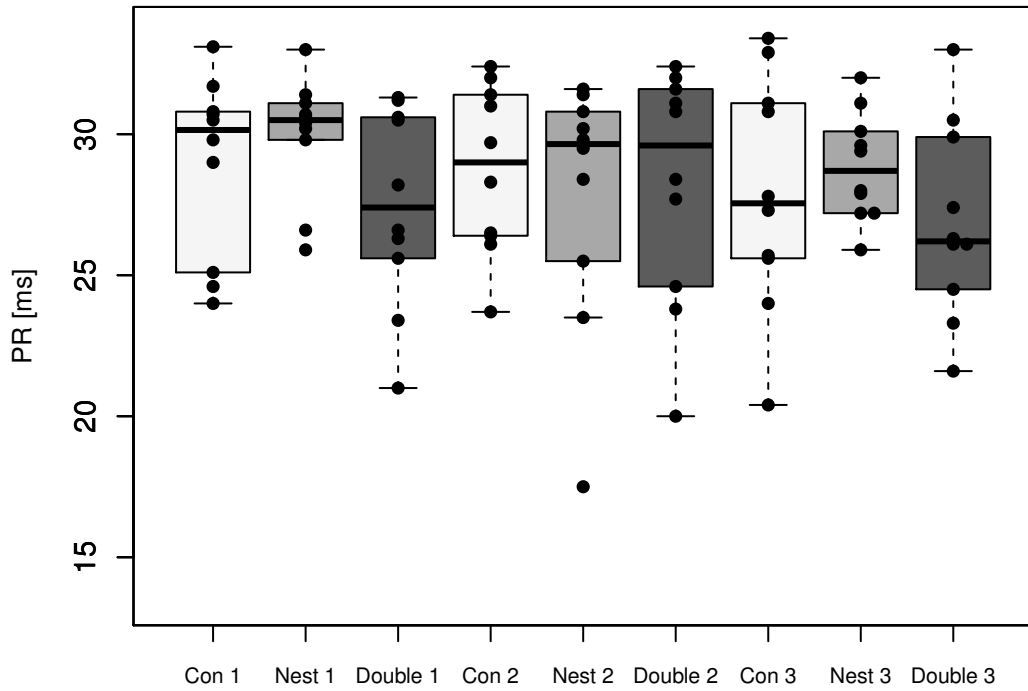**D2 male**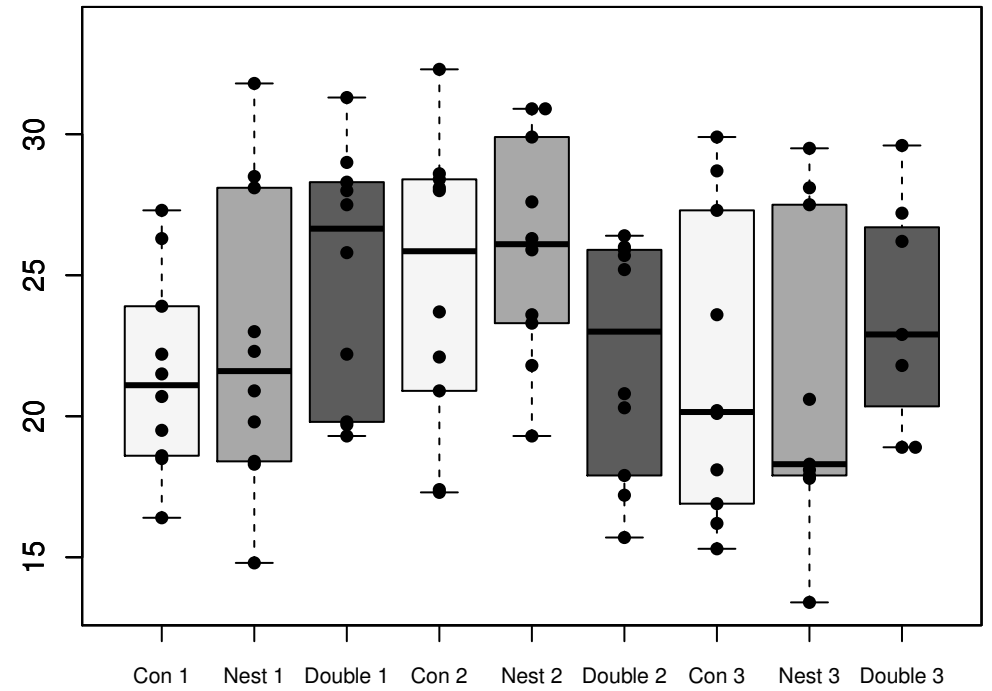



**B6 female**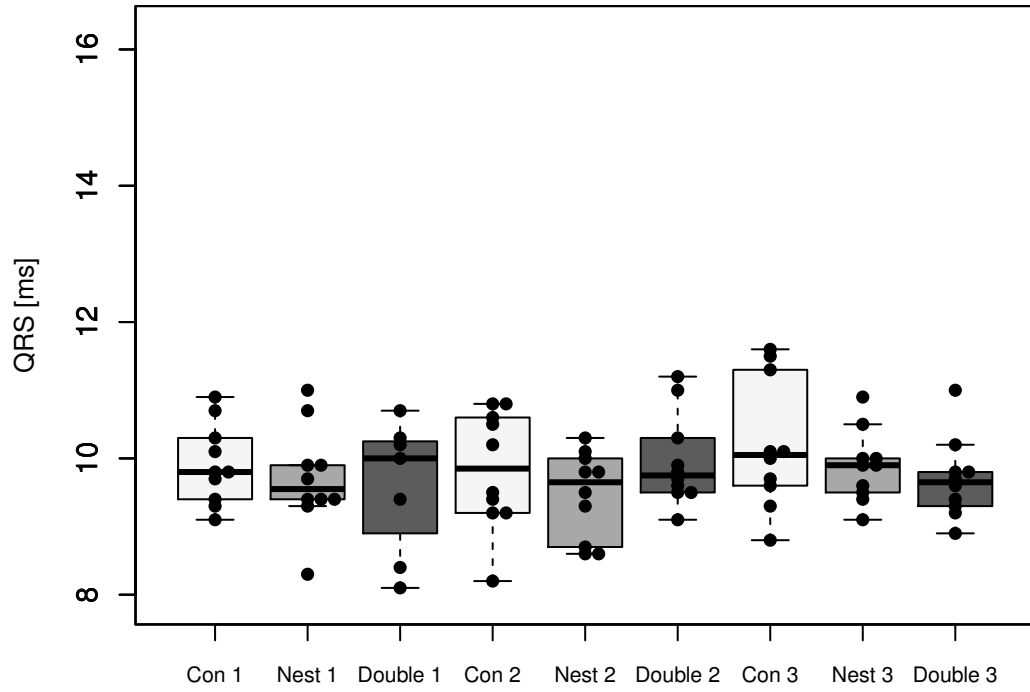**D2 female**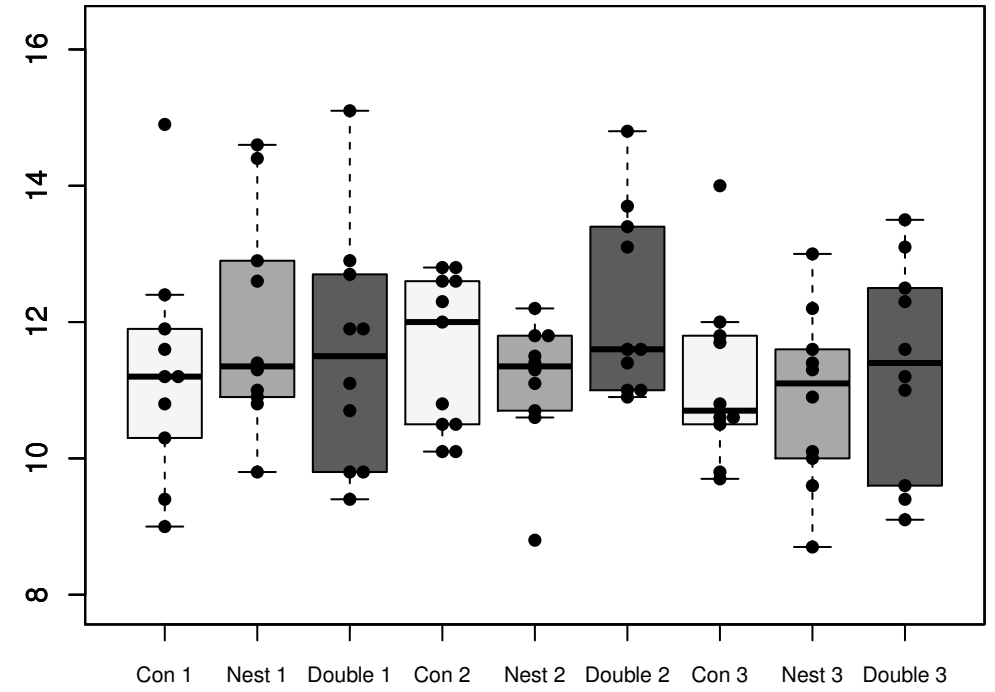**B6 male**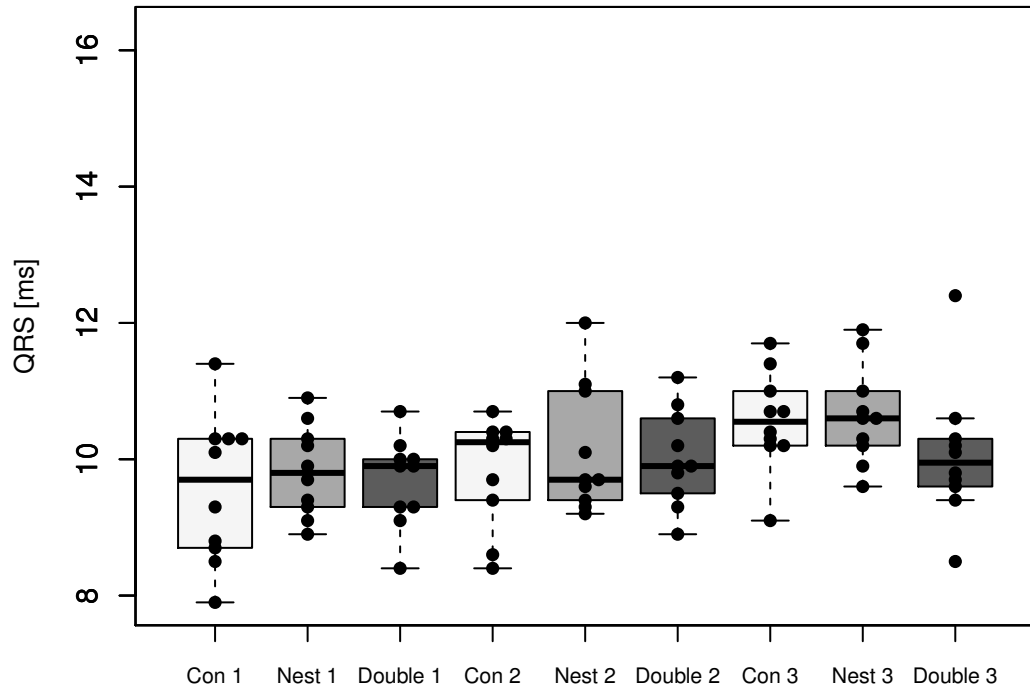**D2 male**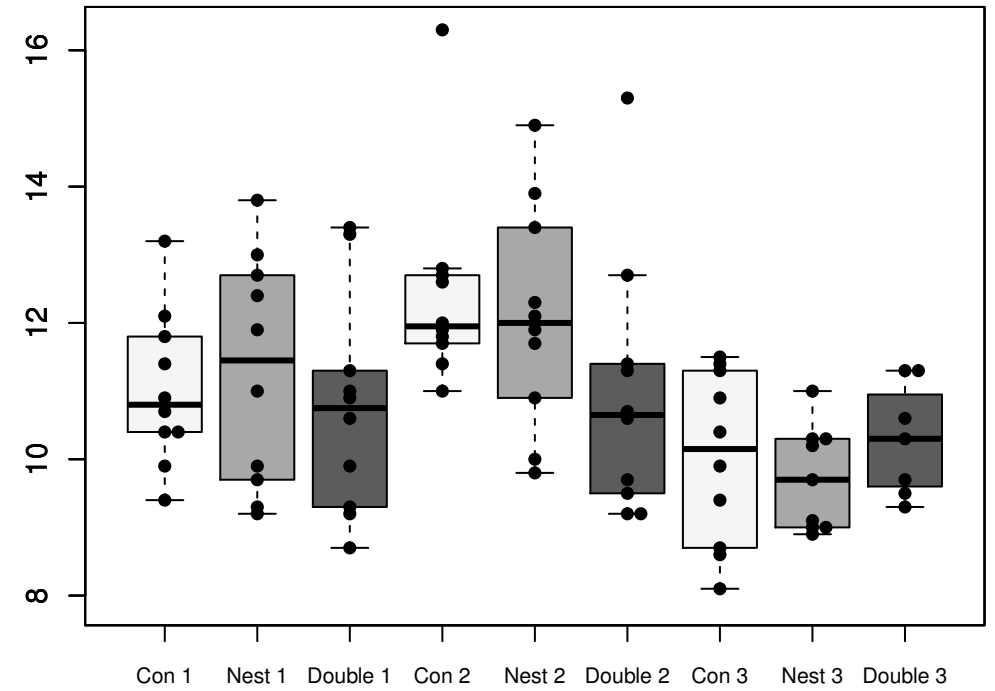

**B6 female**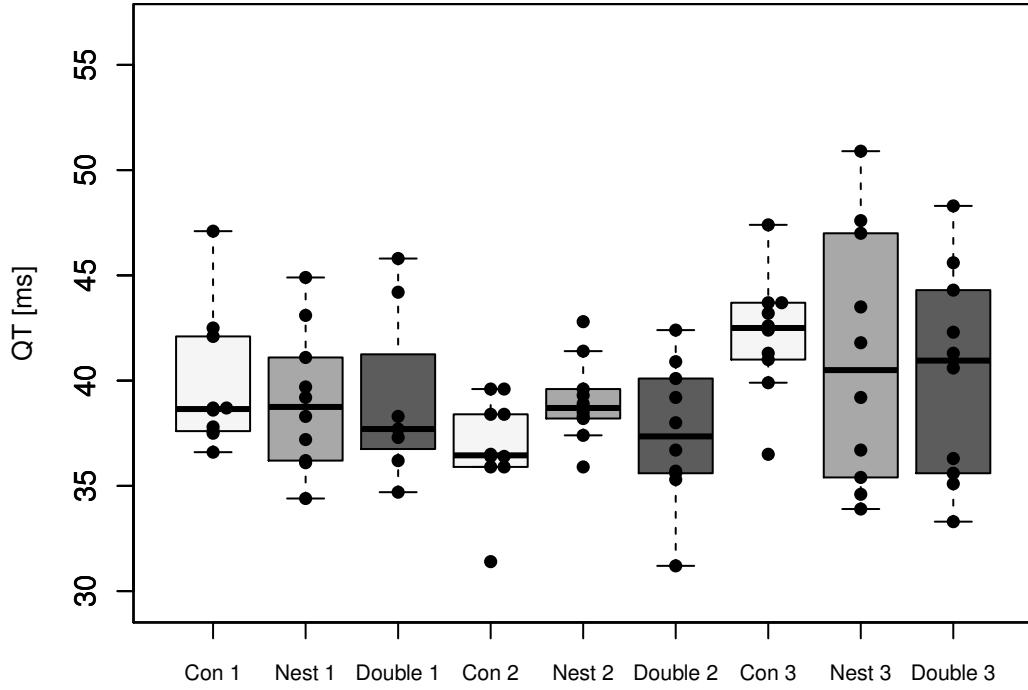**D2 female**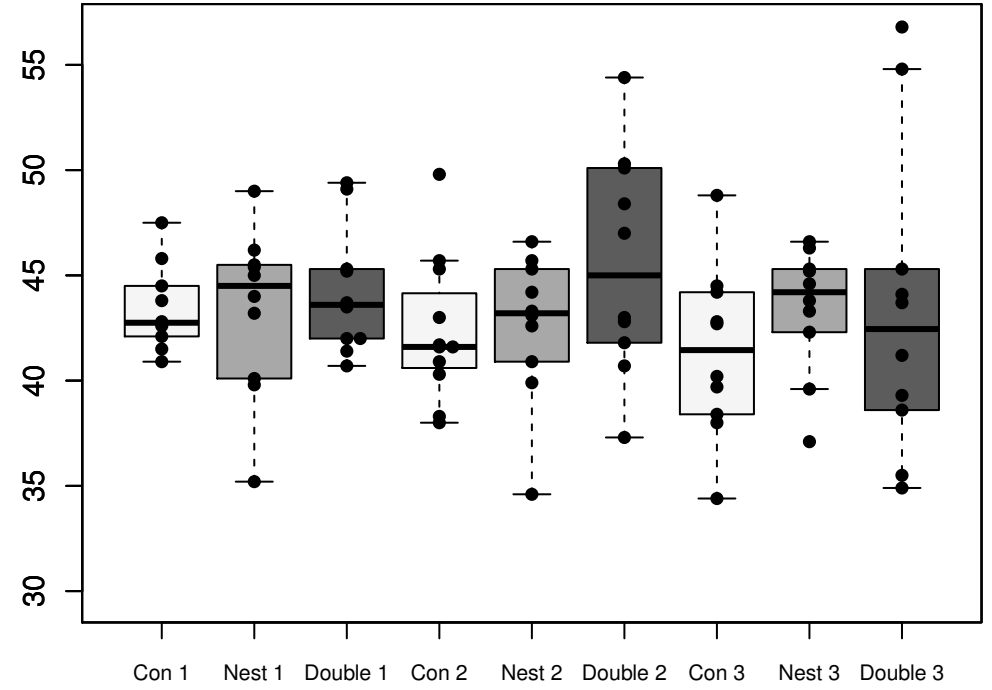**B6 male**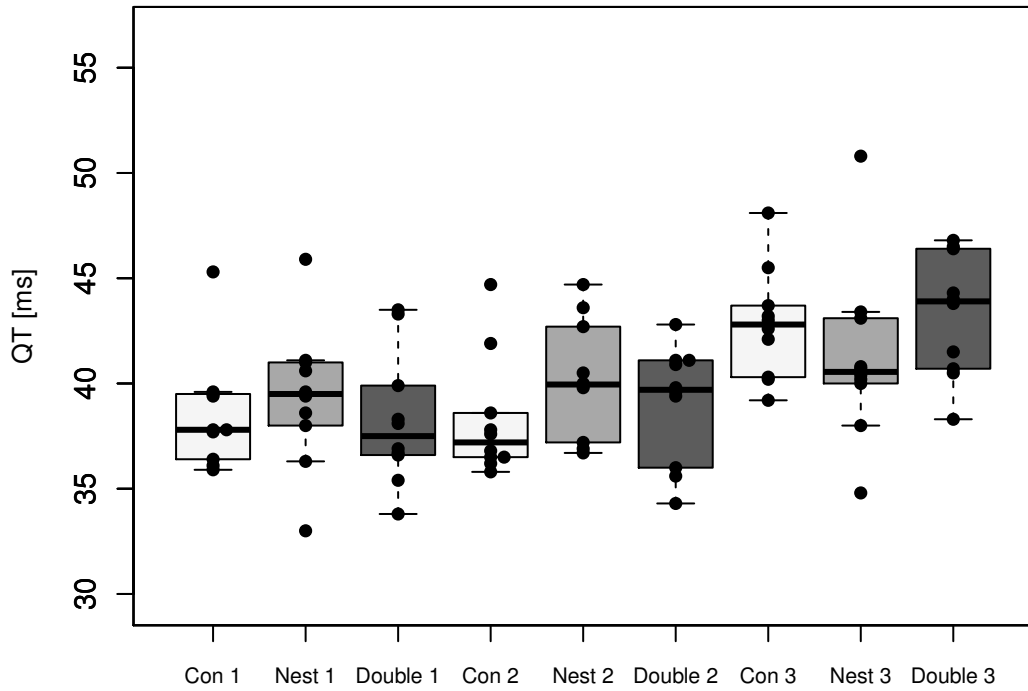**D2 male**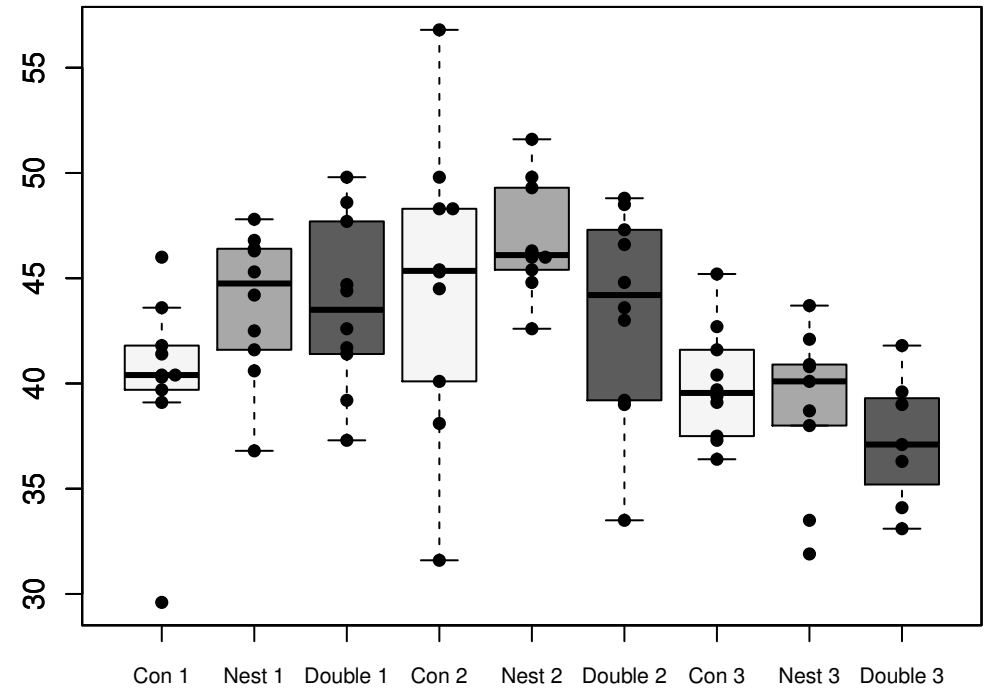

**B6 female**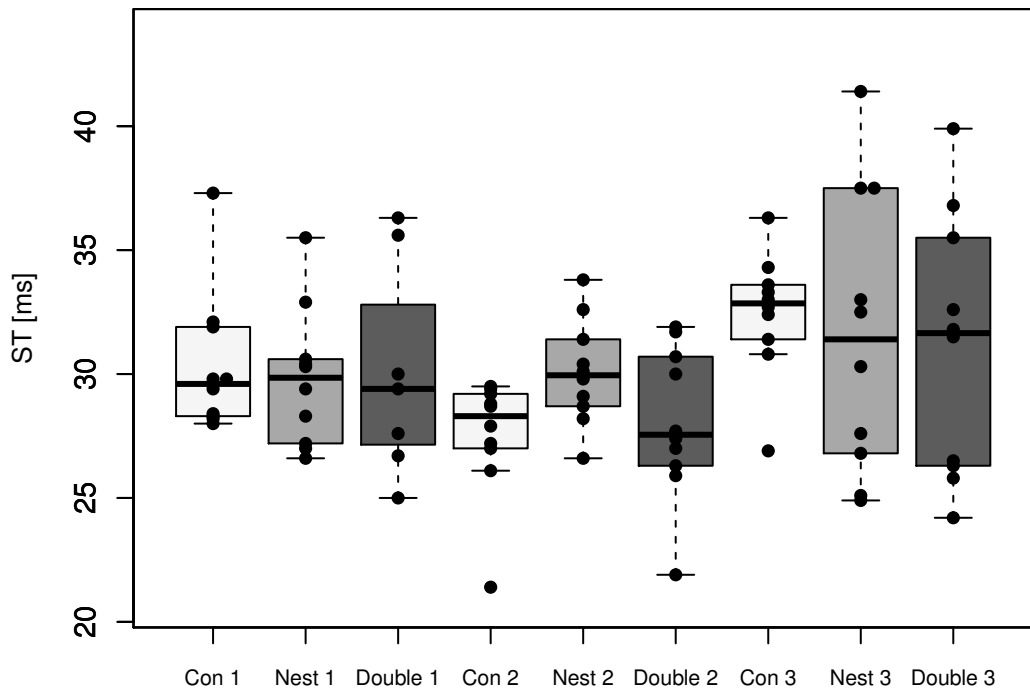**D2 female**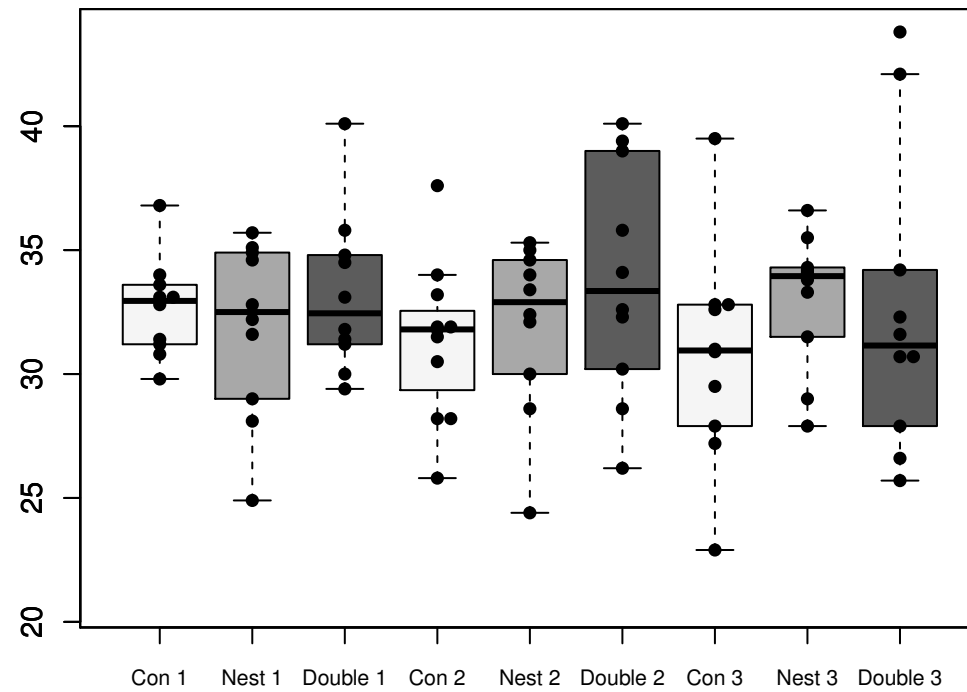**B6 male**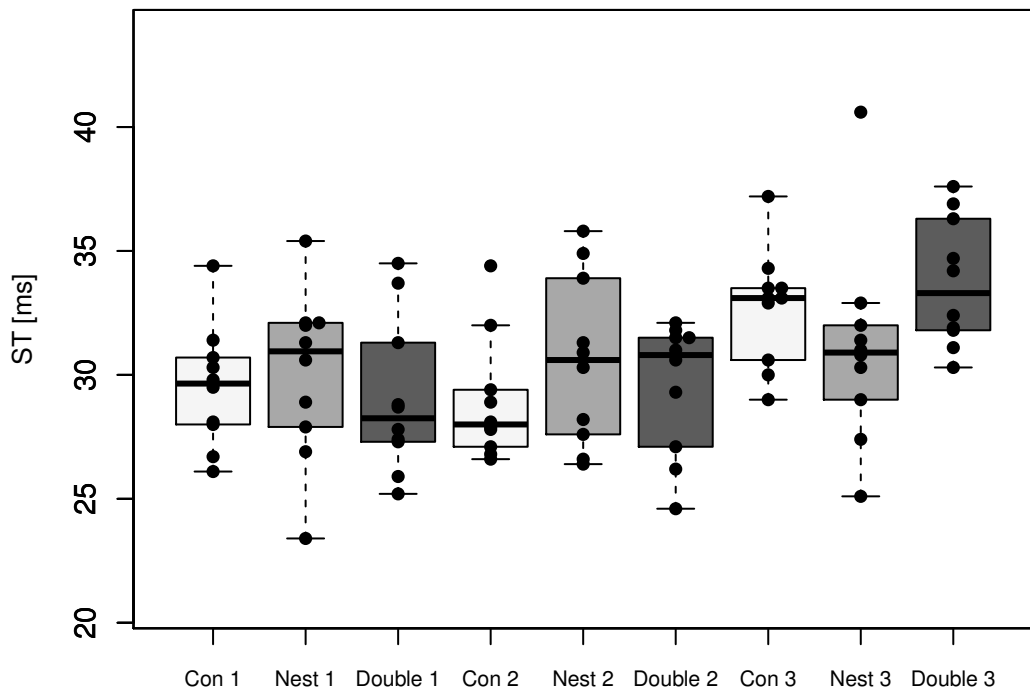**D2 male**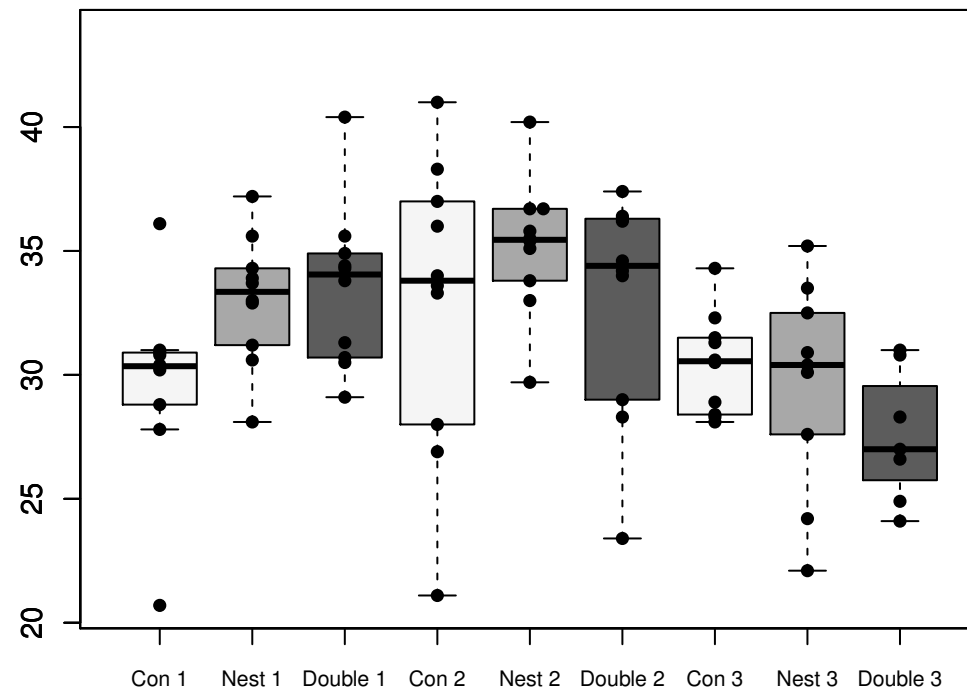

**B6 female**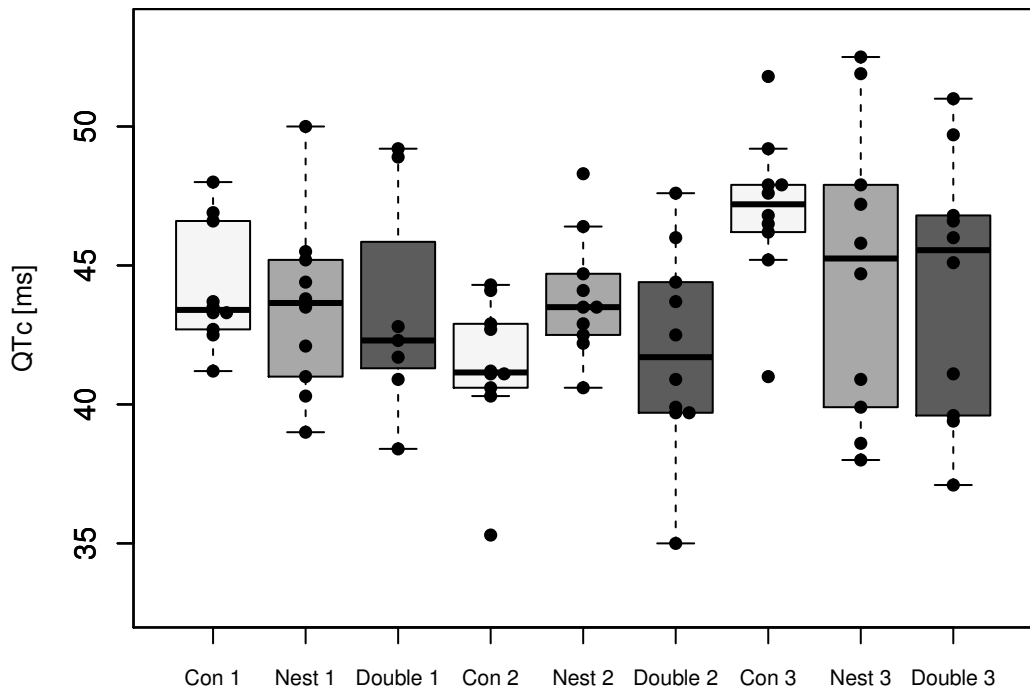**D2 female**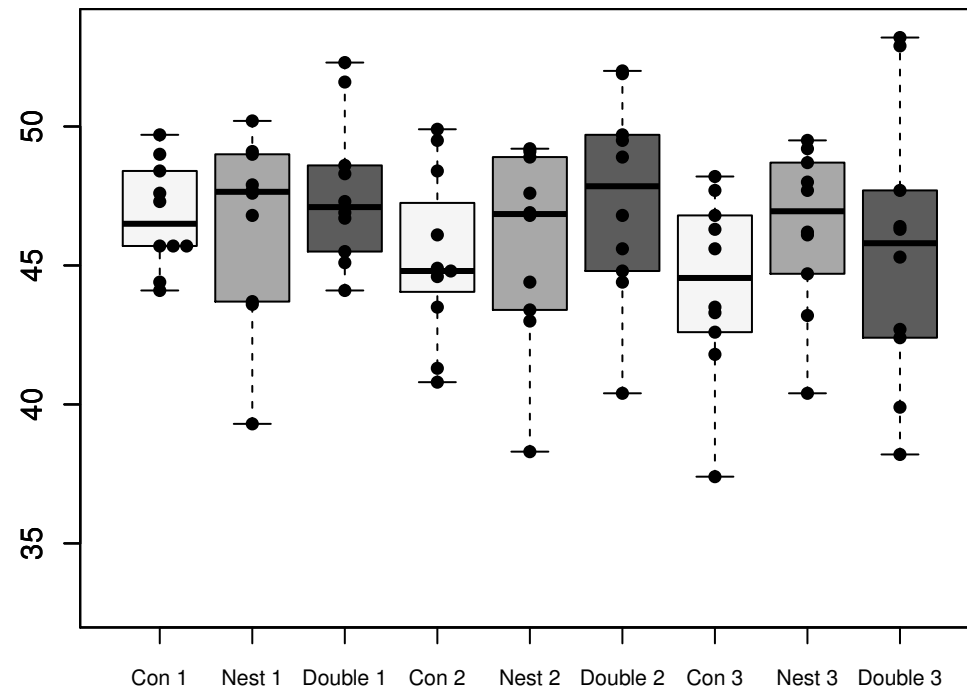**B6 male**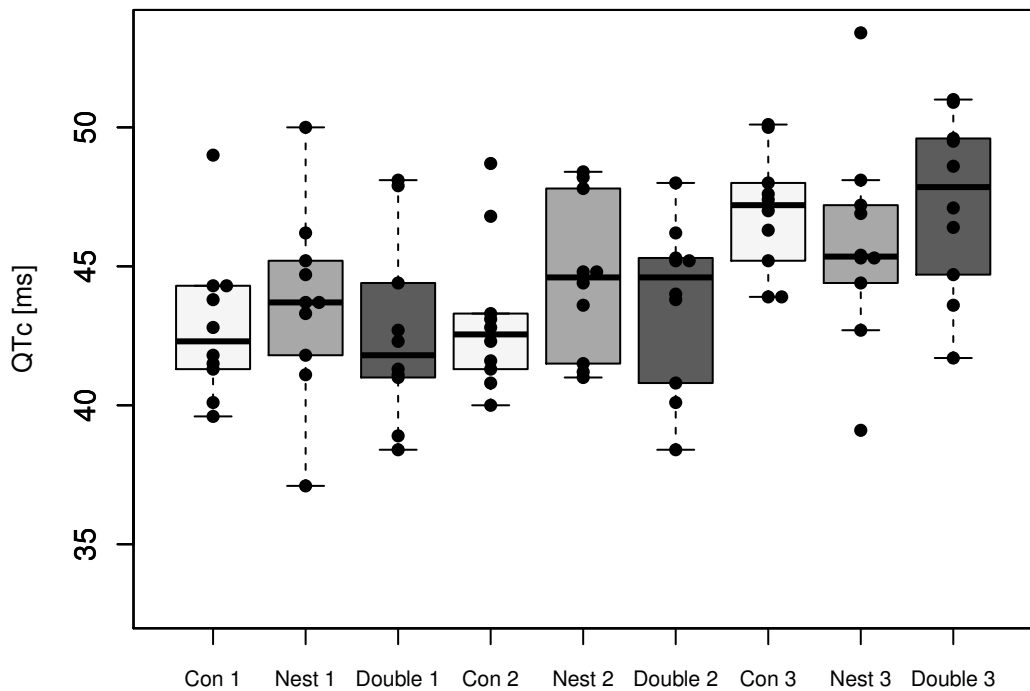**D2 male**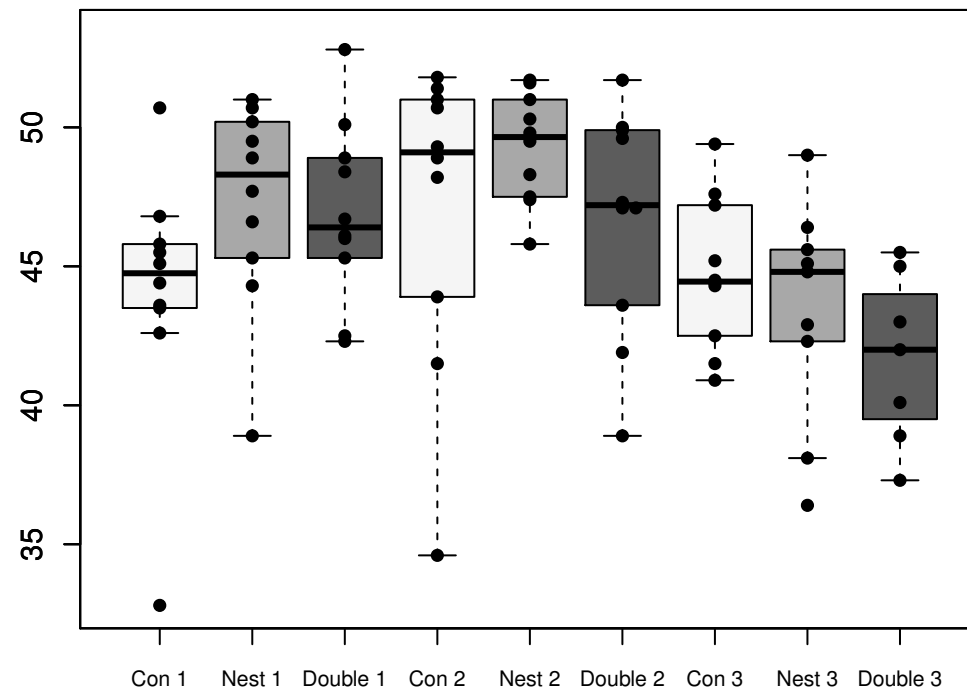

**B6 female**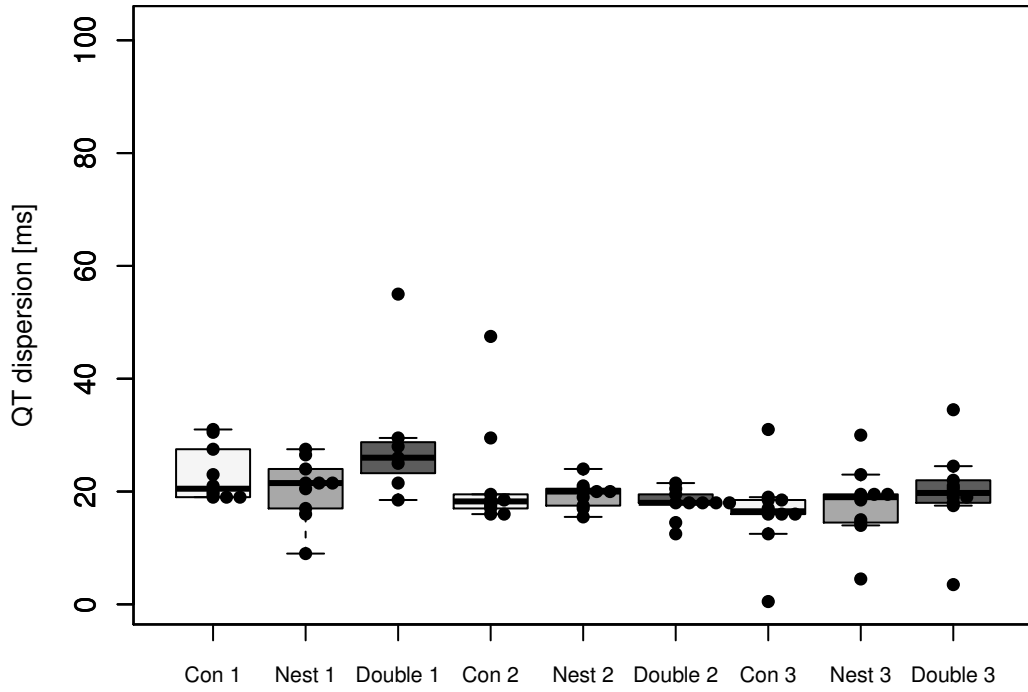**D2 female**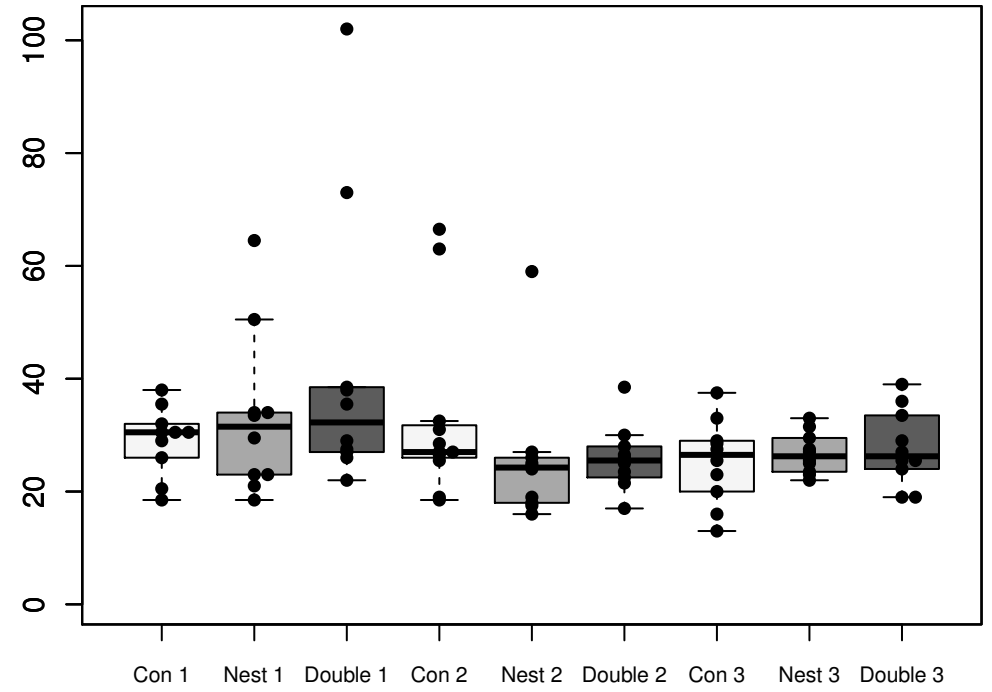**B6 male**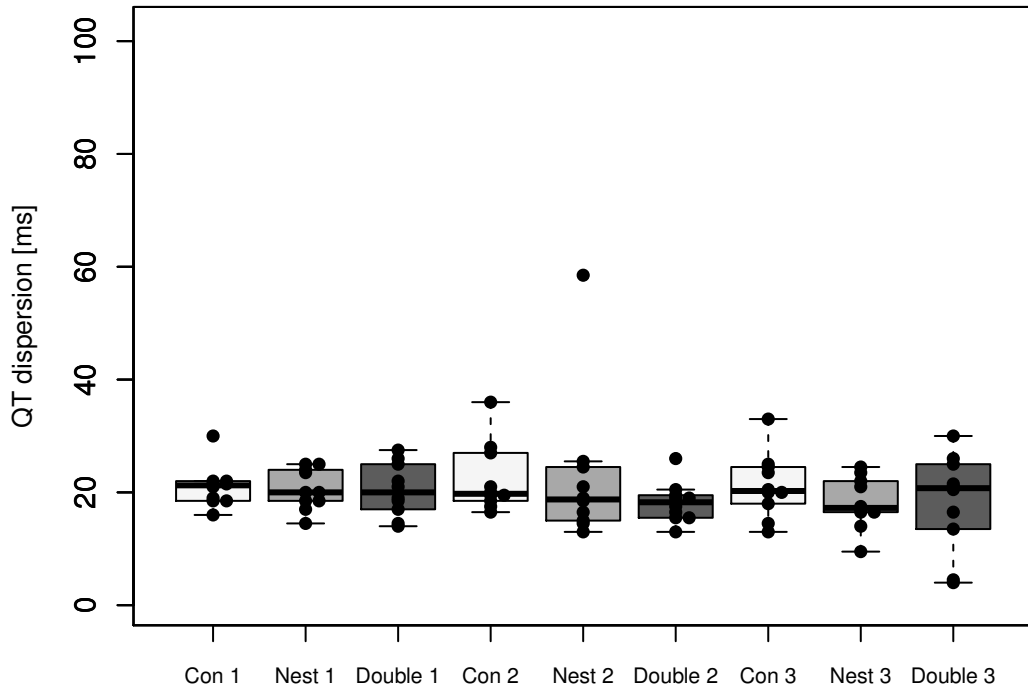**D2 male**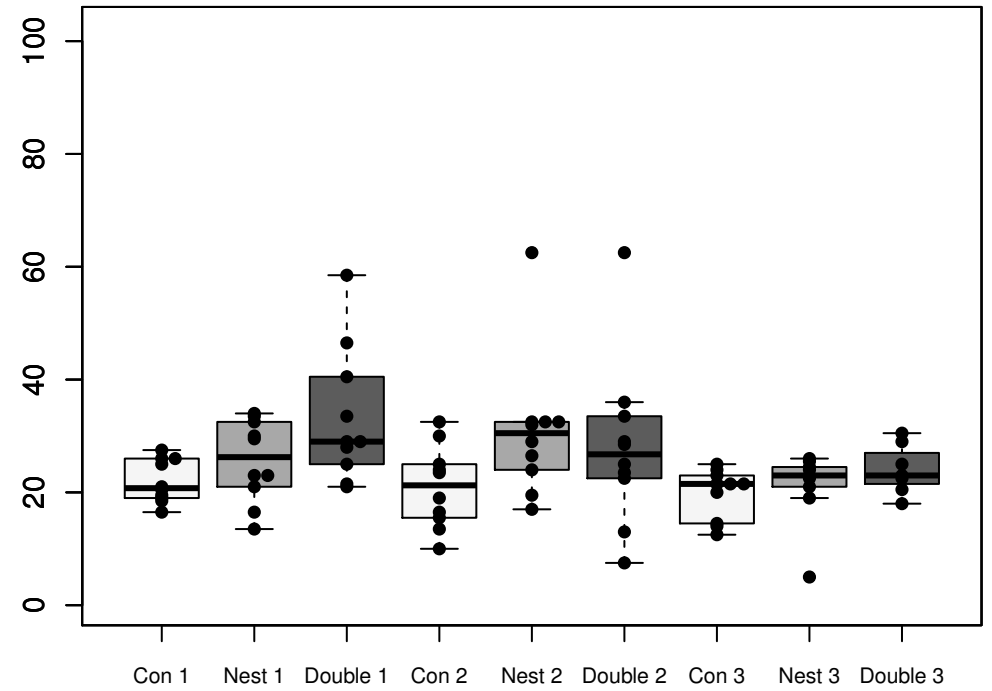

**B6 female**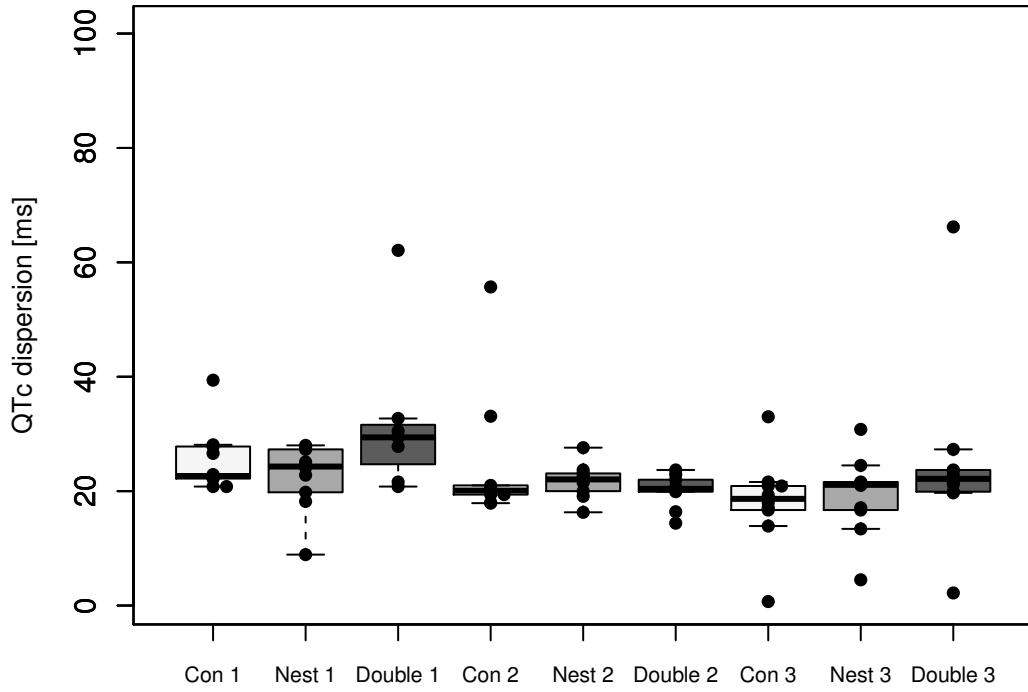**D2 female**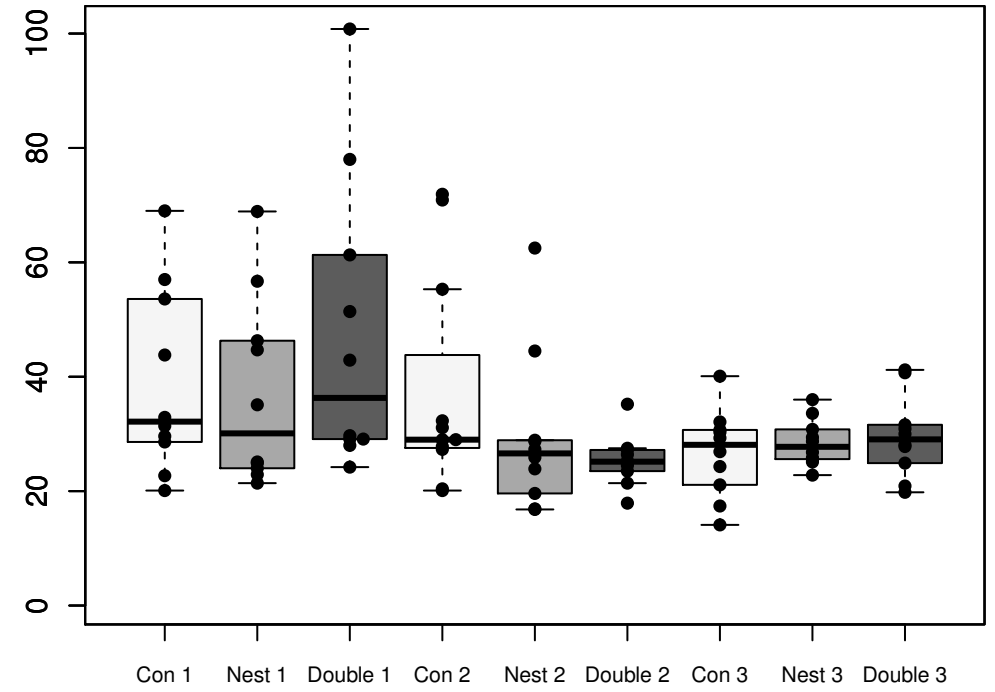**B6 male**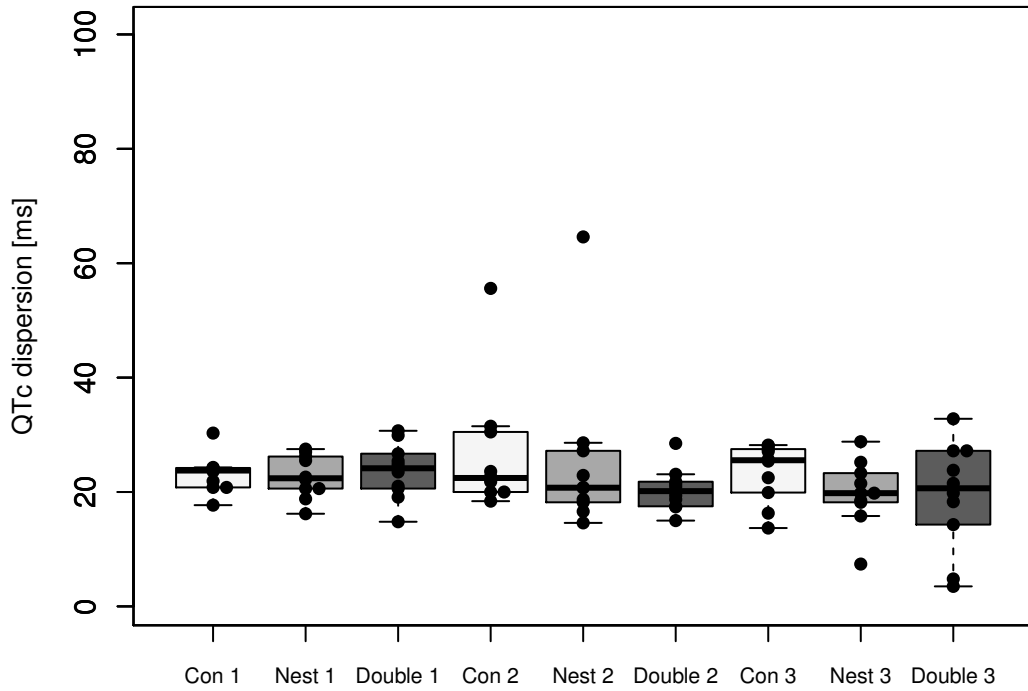**D2 male**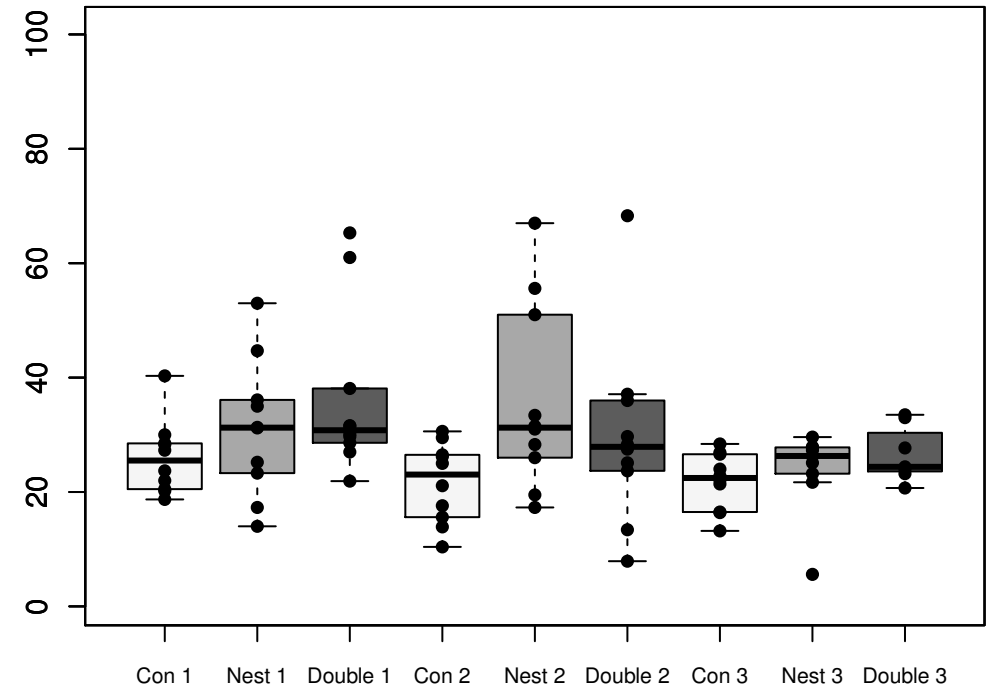

**B6 female**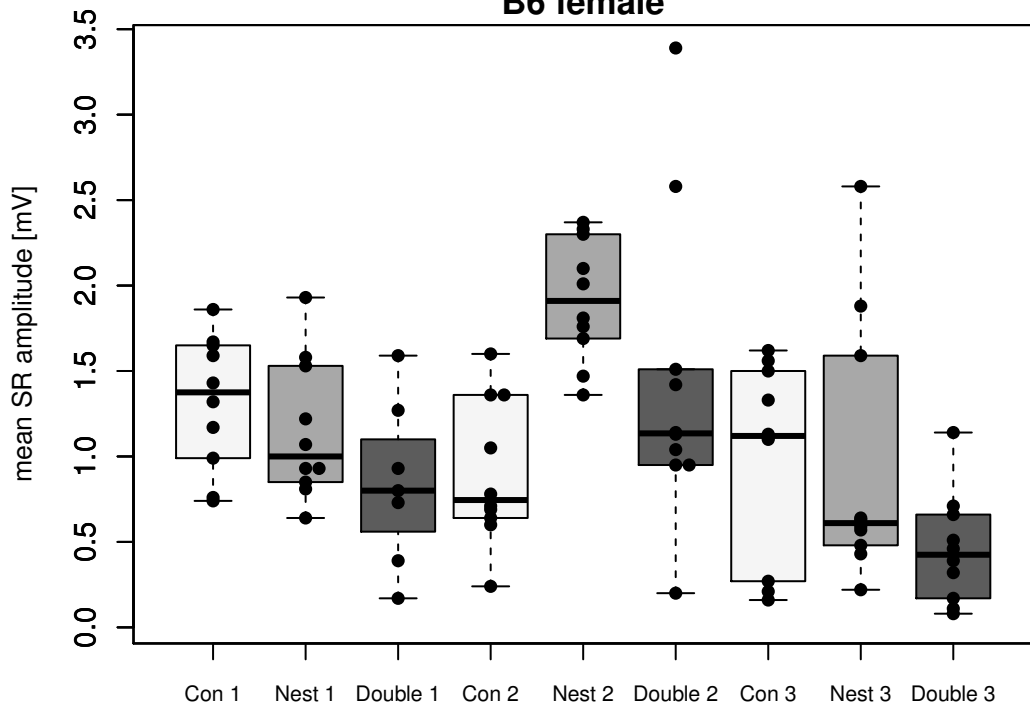**D2 female**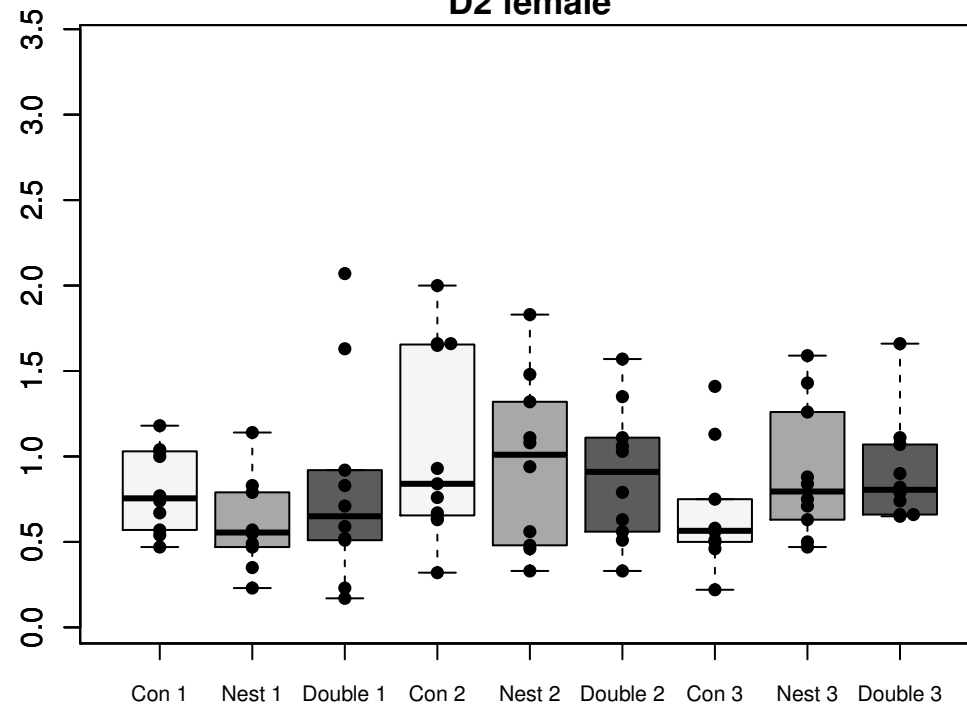**B6 male**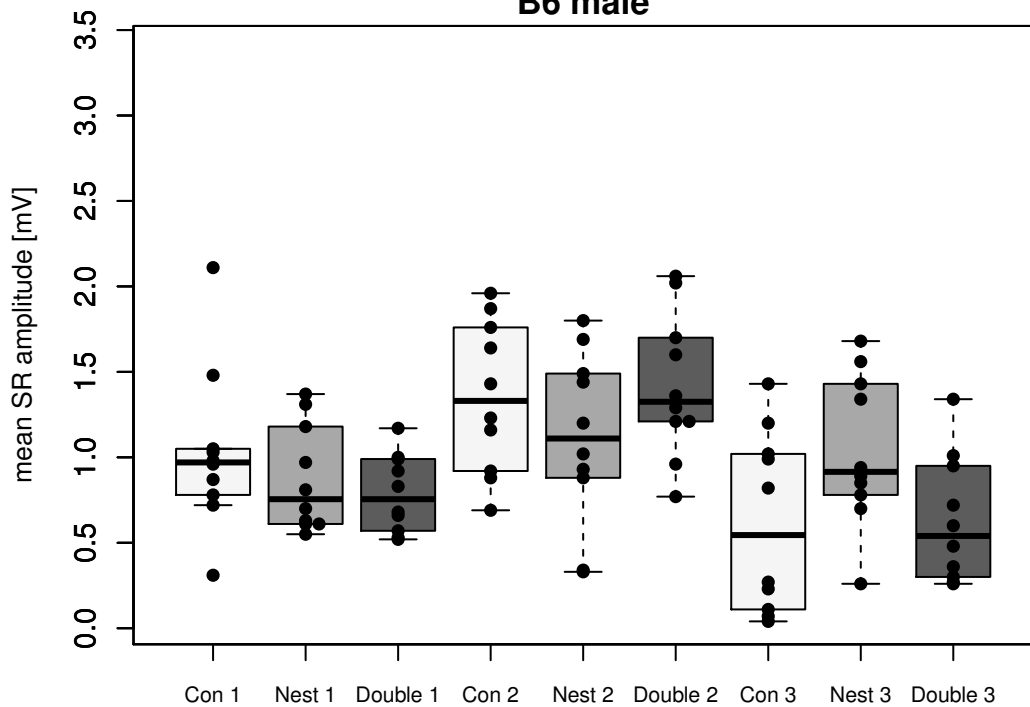**D2 male**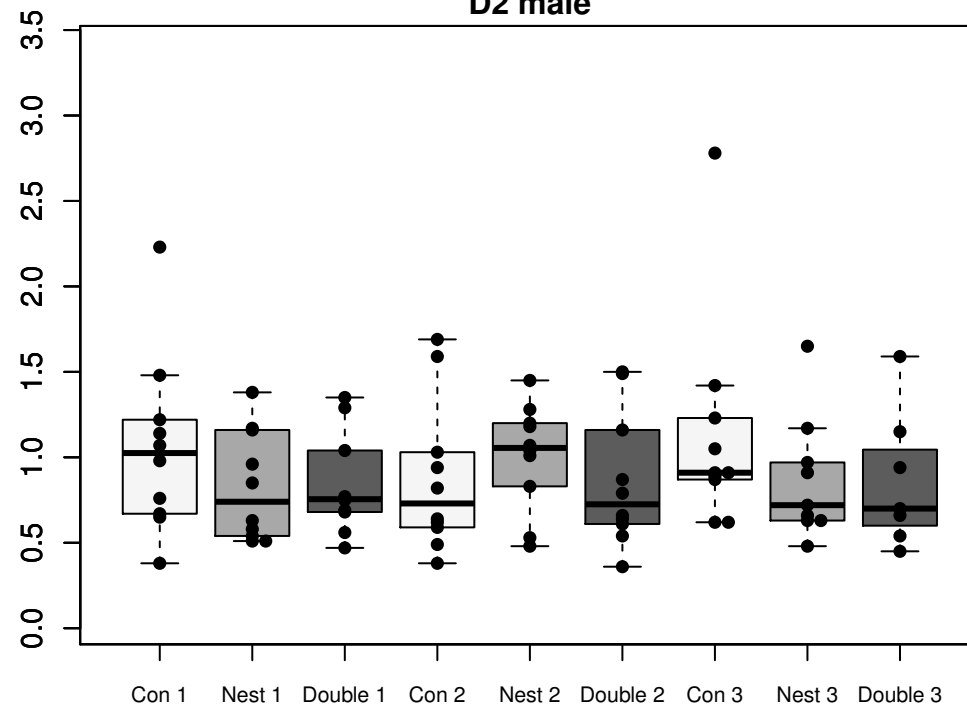

**B6 female**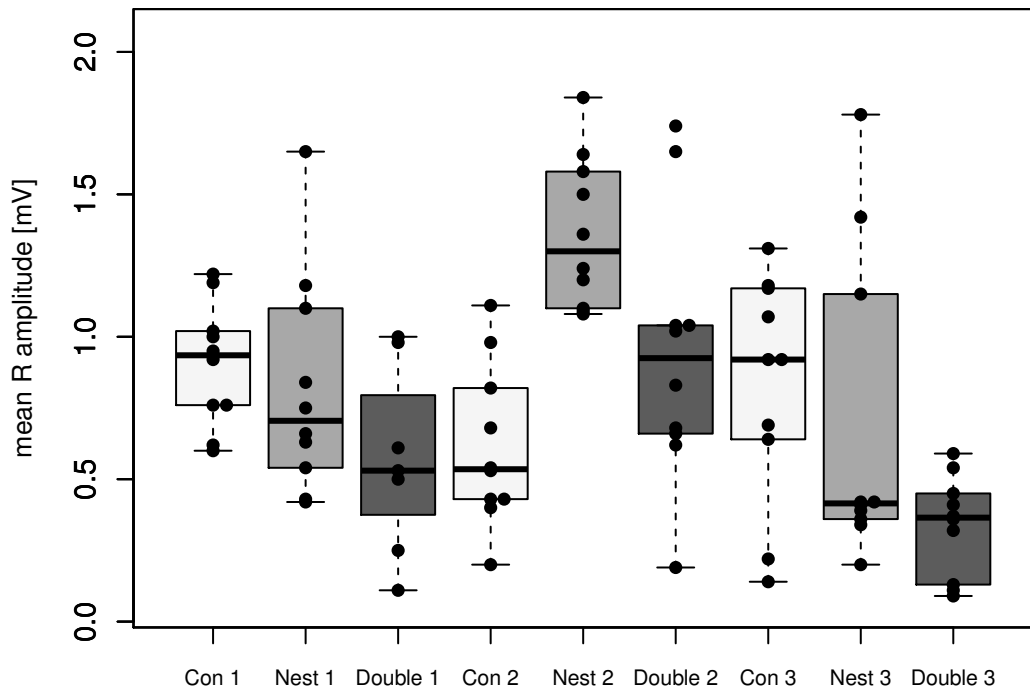**D2 female**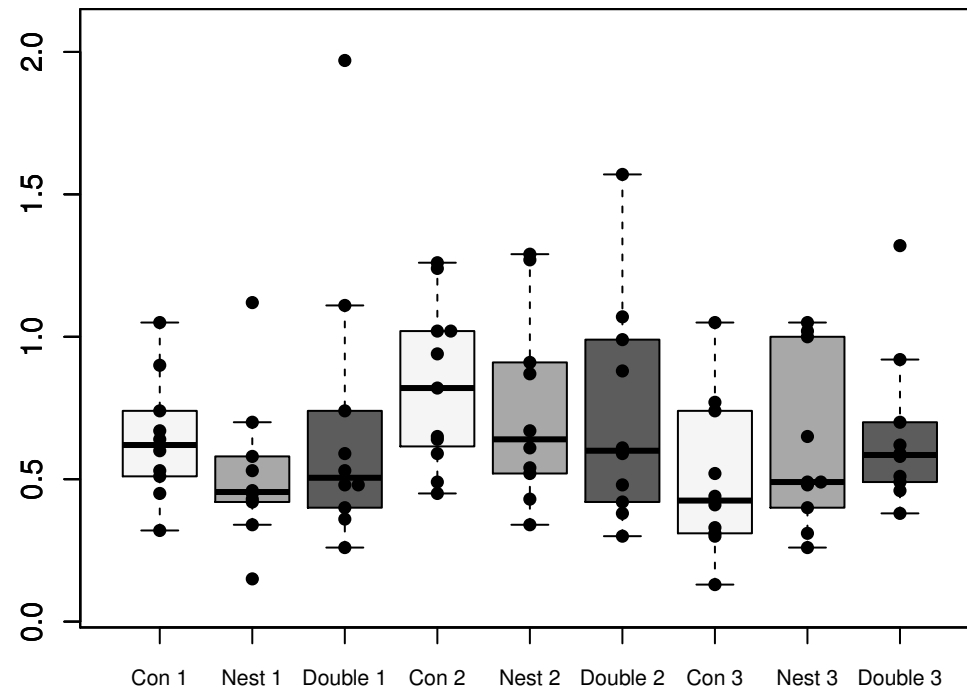**B6 male**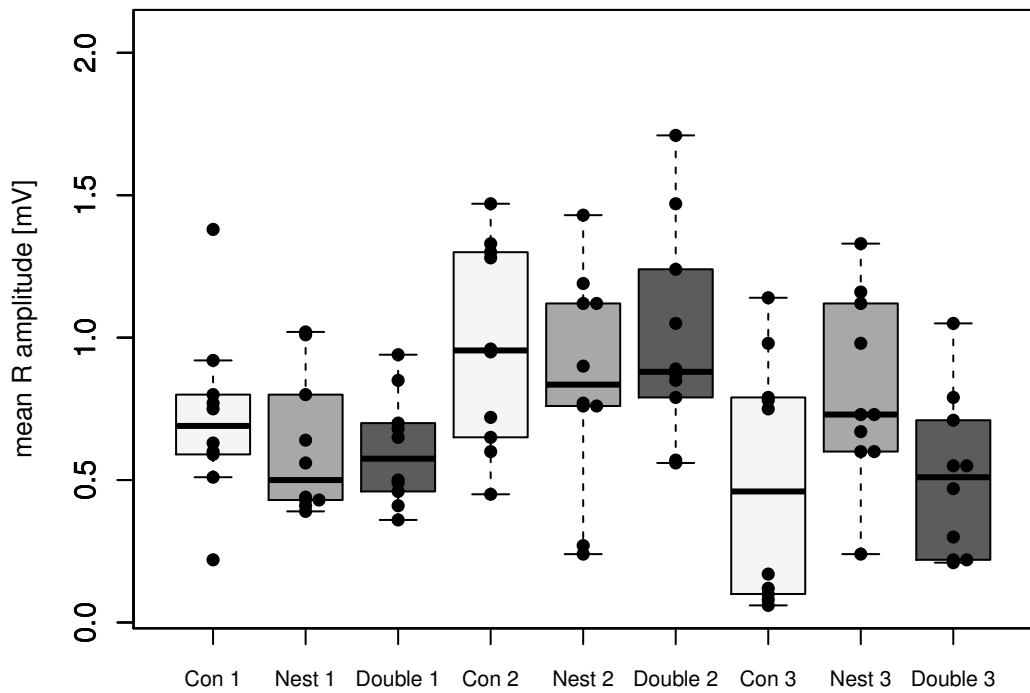**D2 male**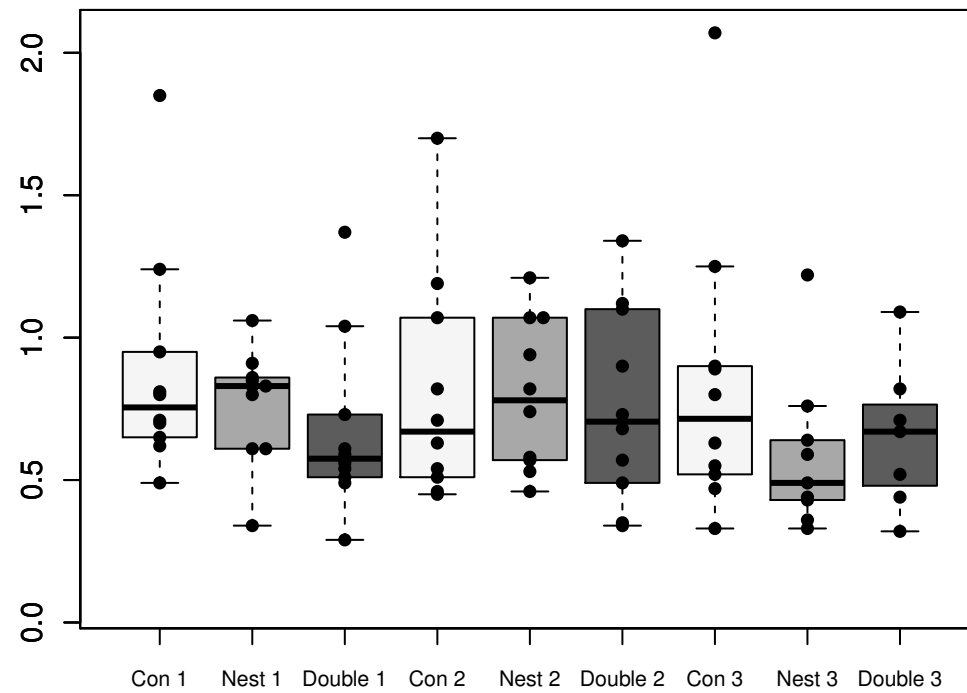



**B6 female**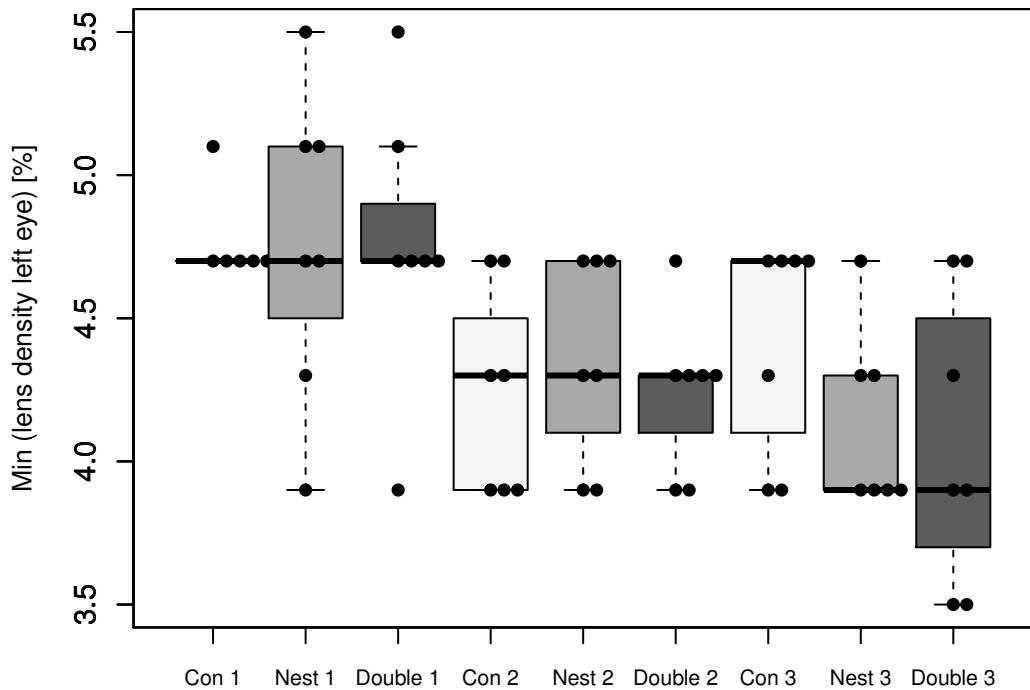**D2 female**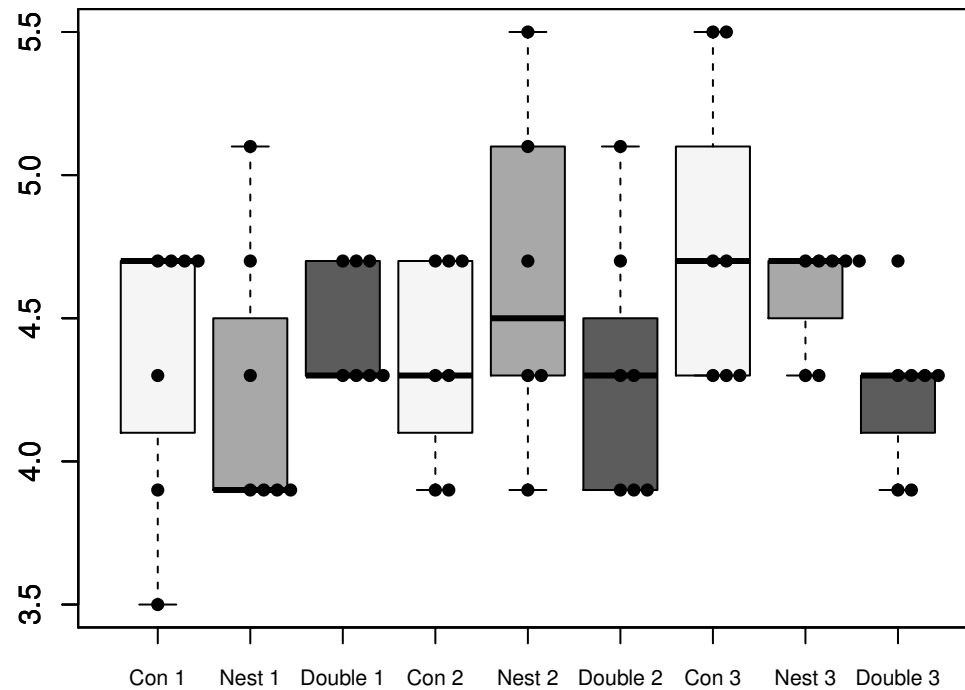**B6 male**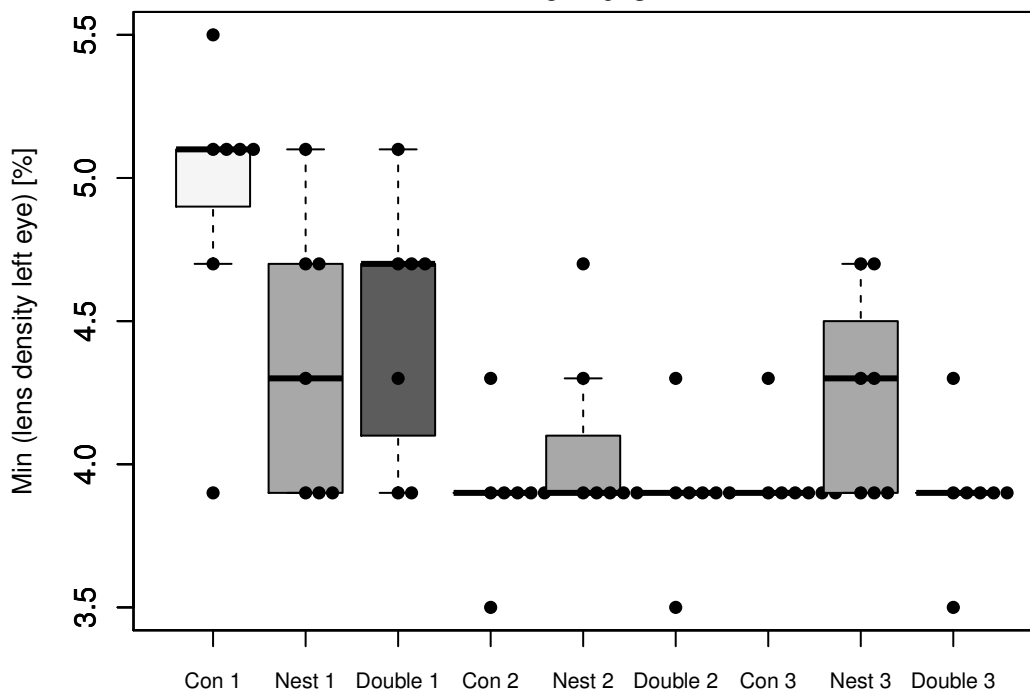**D2 male**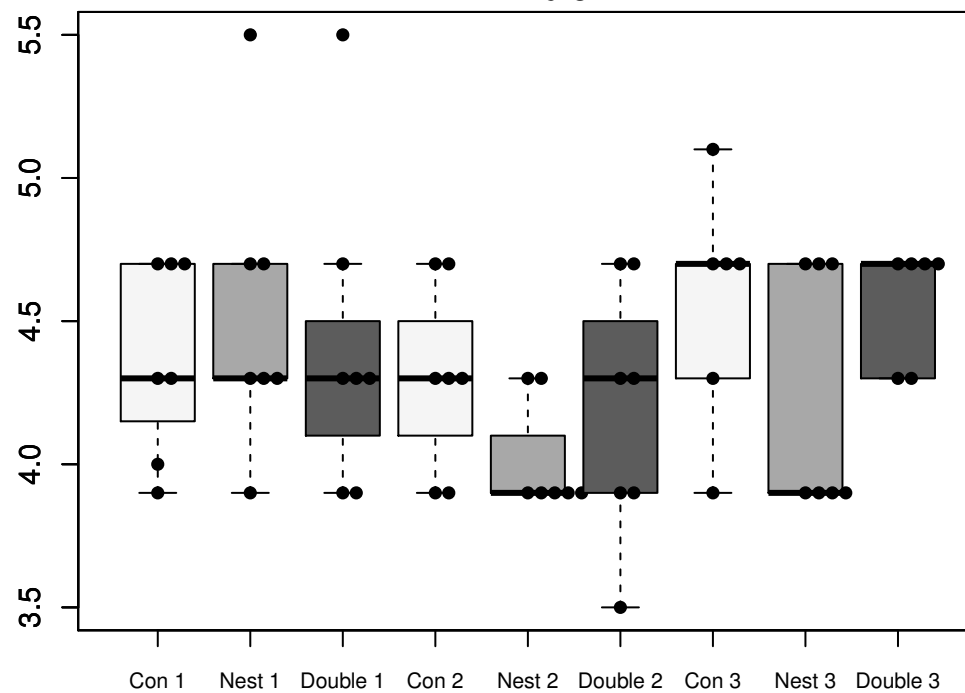

**B6 female**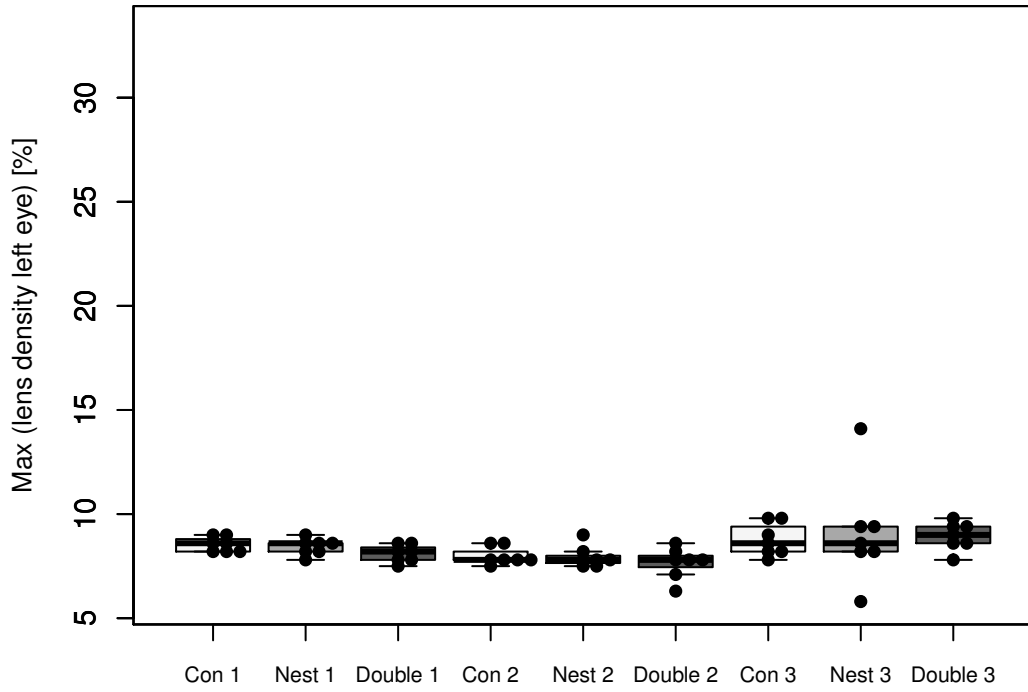**D2 female**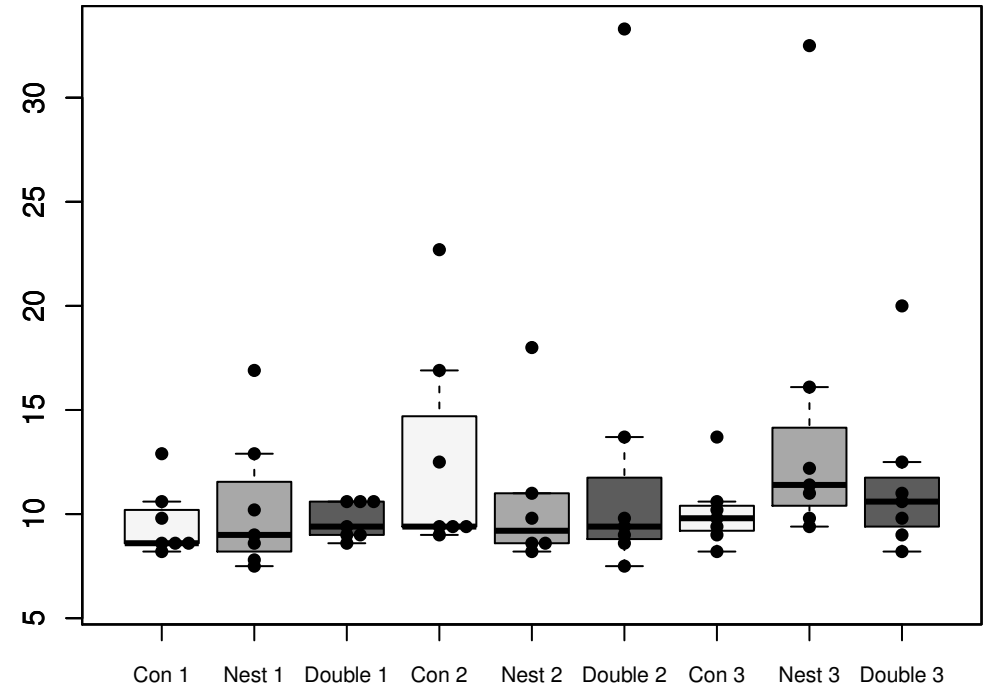**B6 male**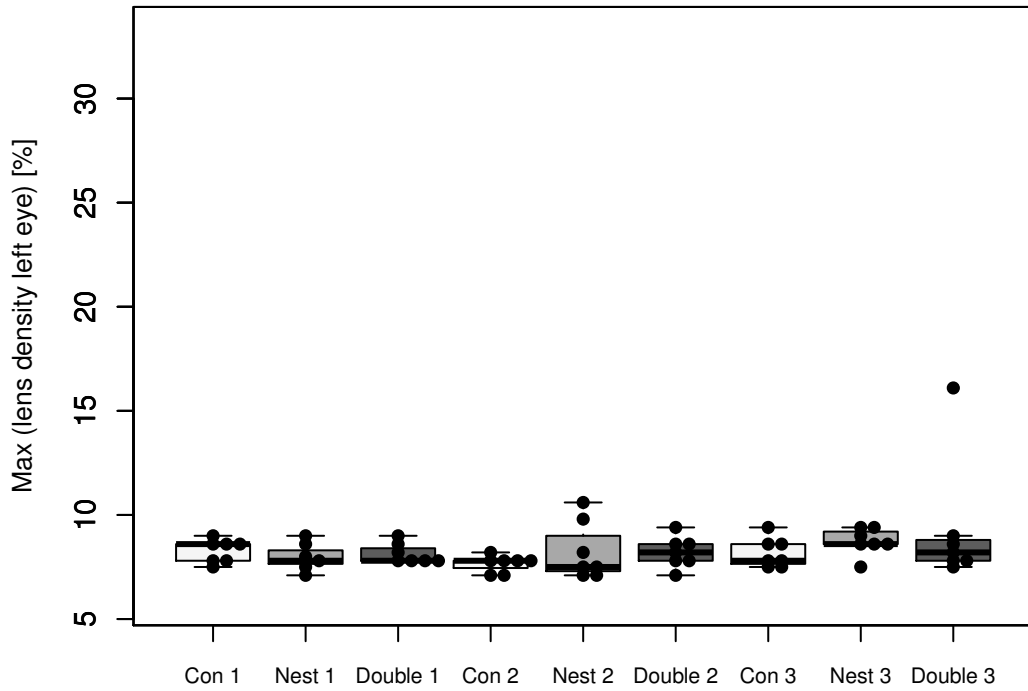**D2 male**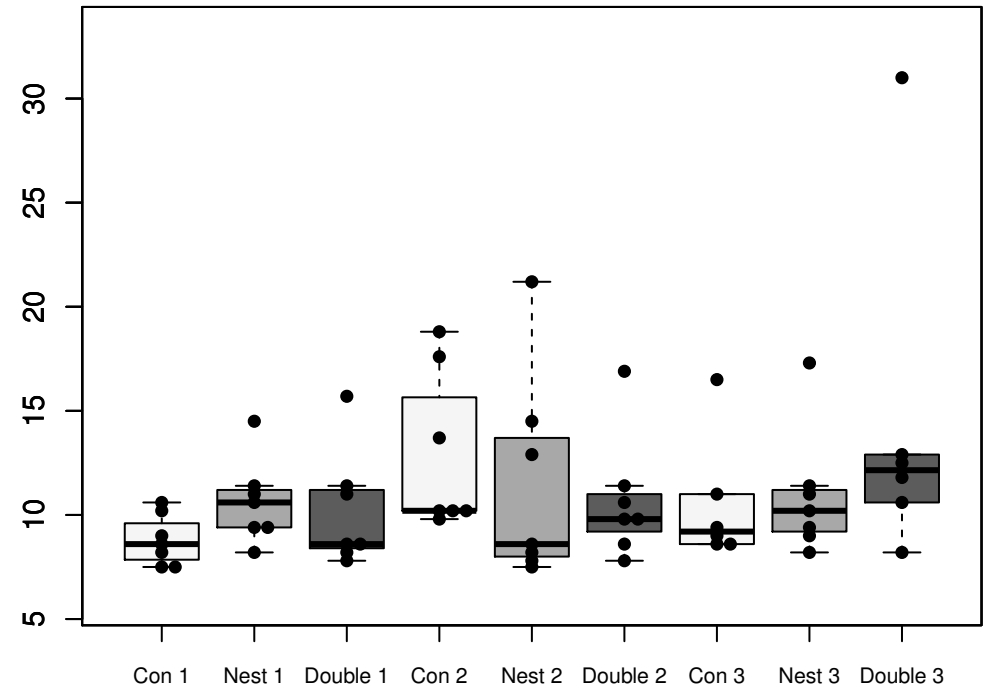

**B6 female**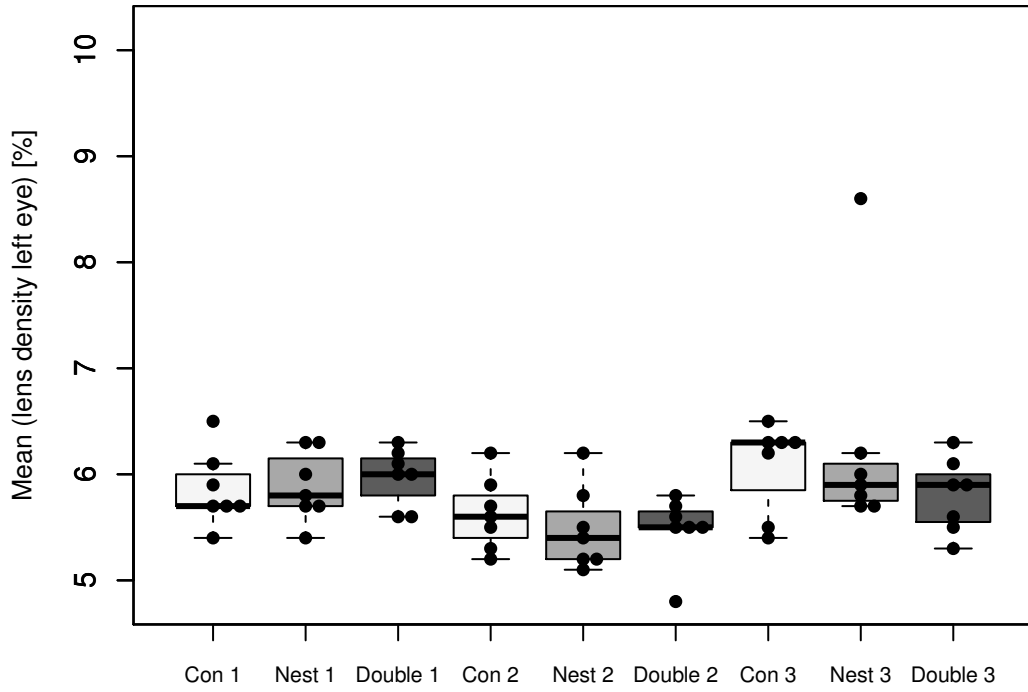**D2 female**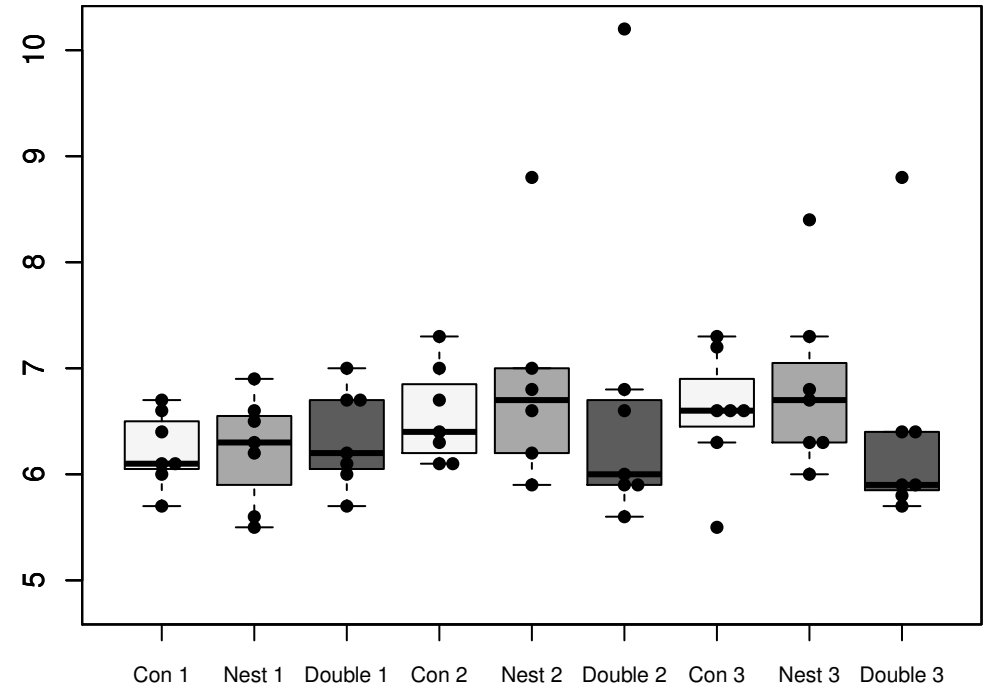**B6 male**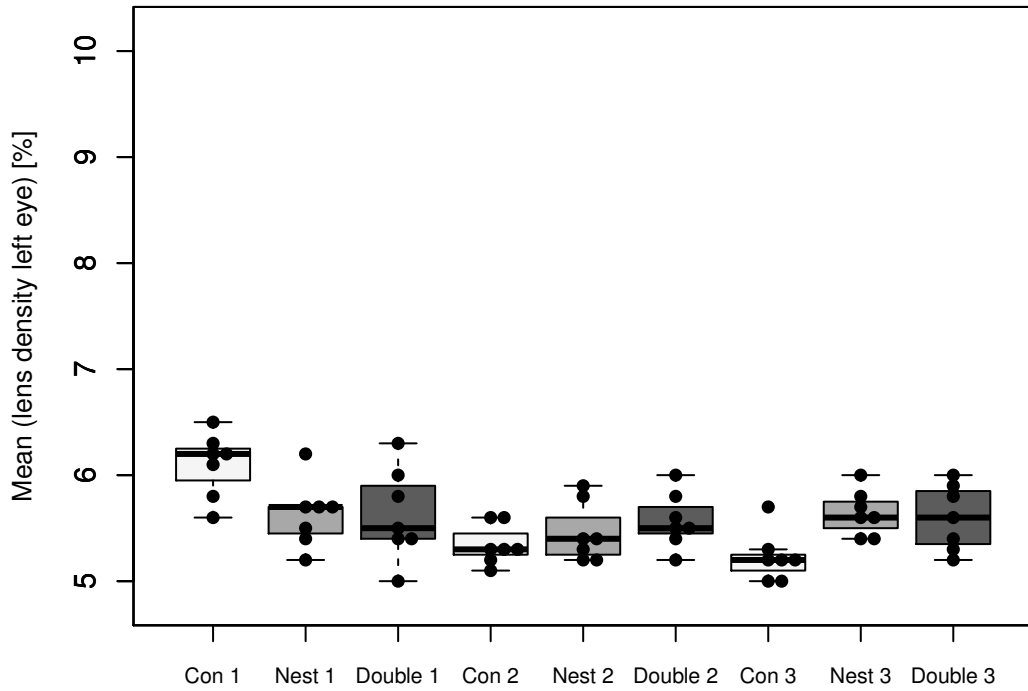**D2 male**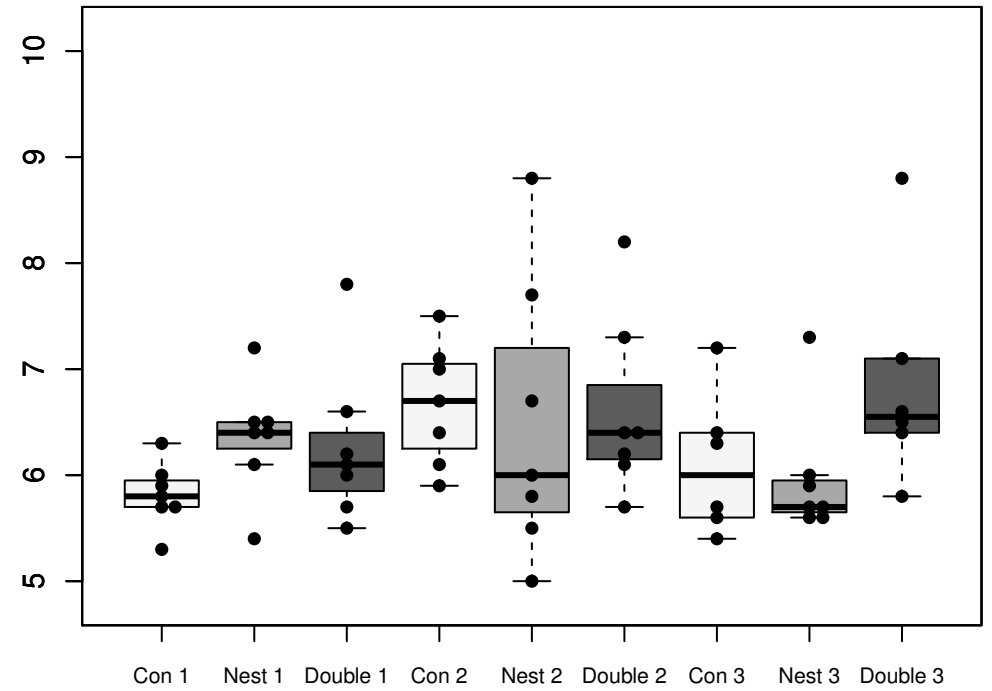

**B6 female**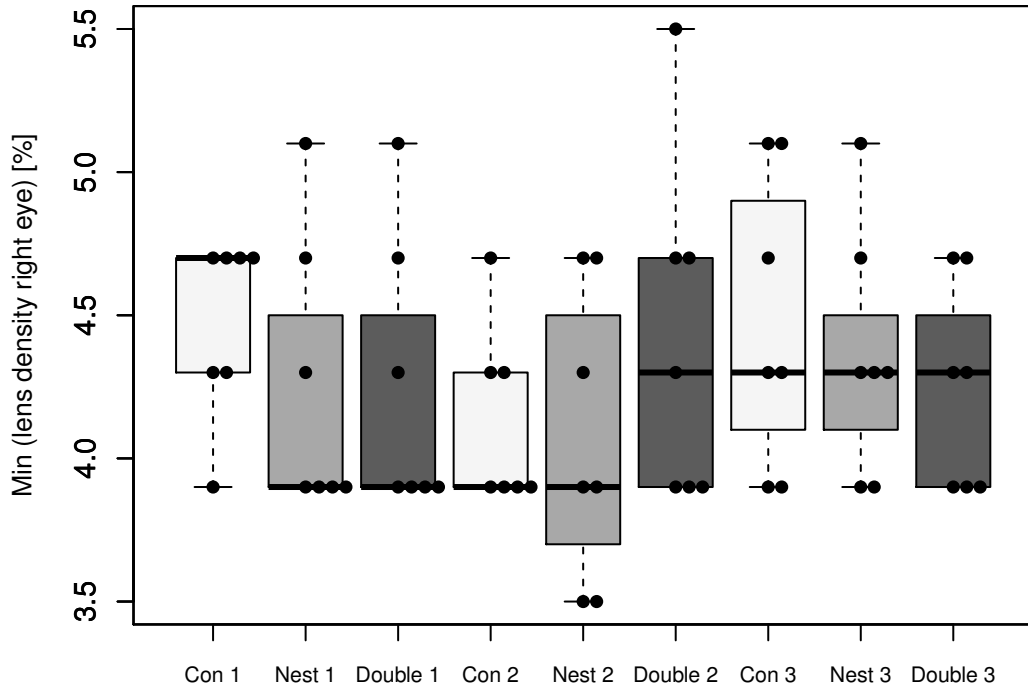**D2 female**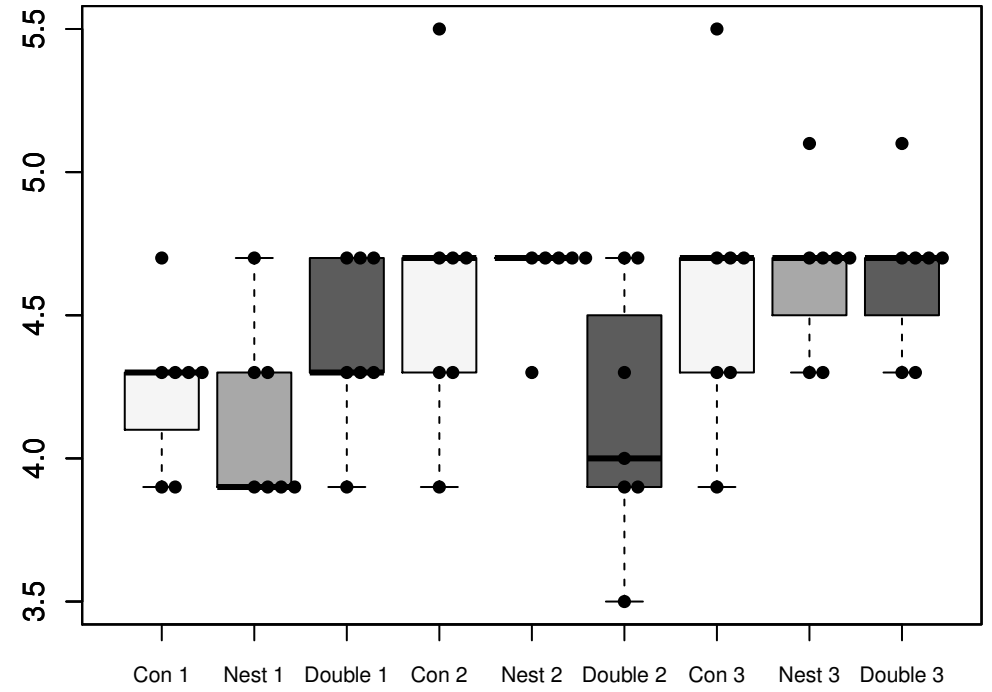**B6 male**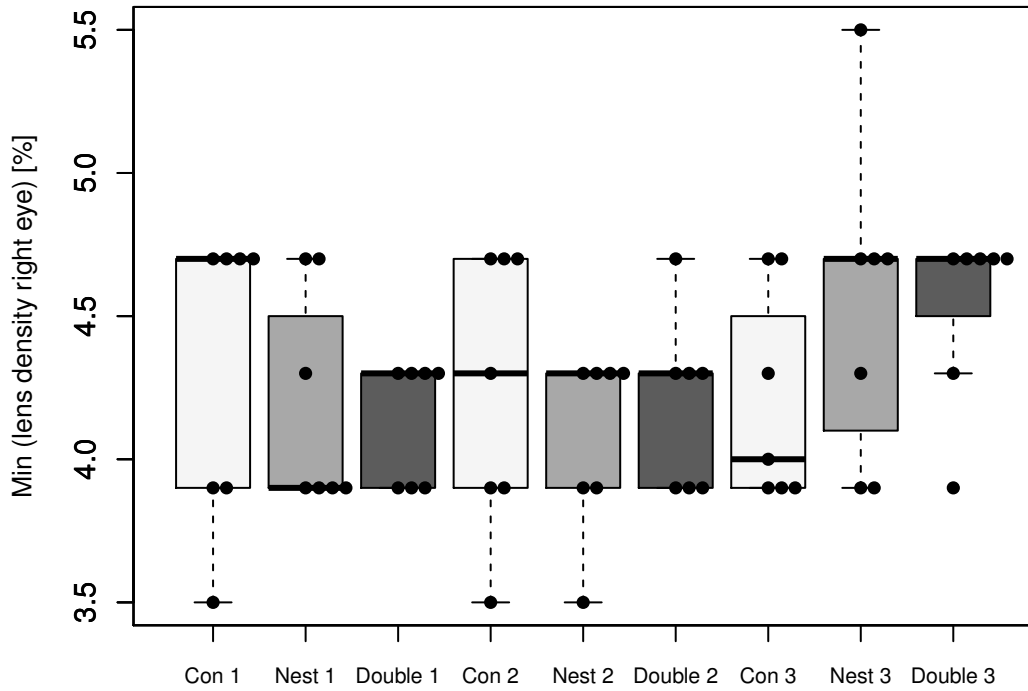**D2 male**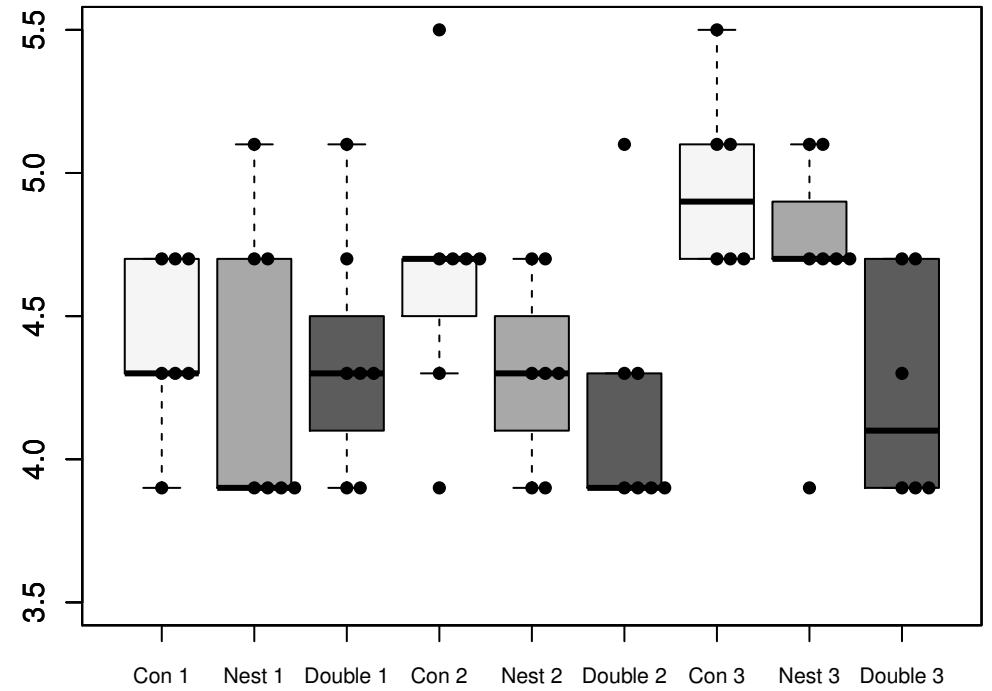

**B6 female**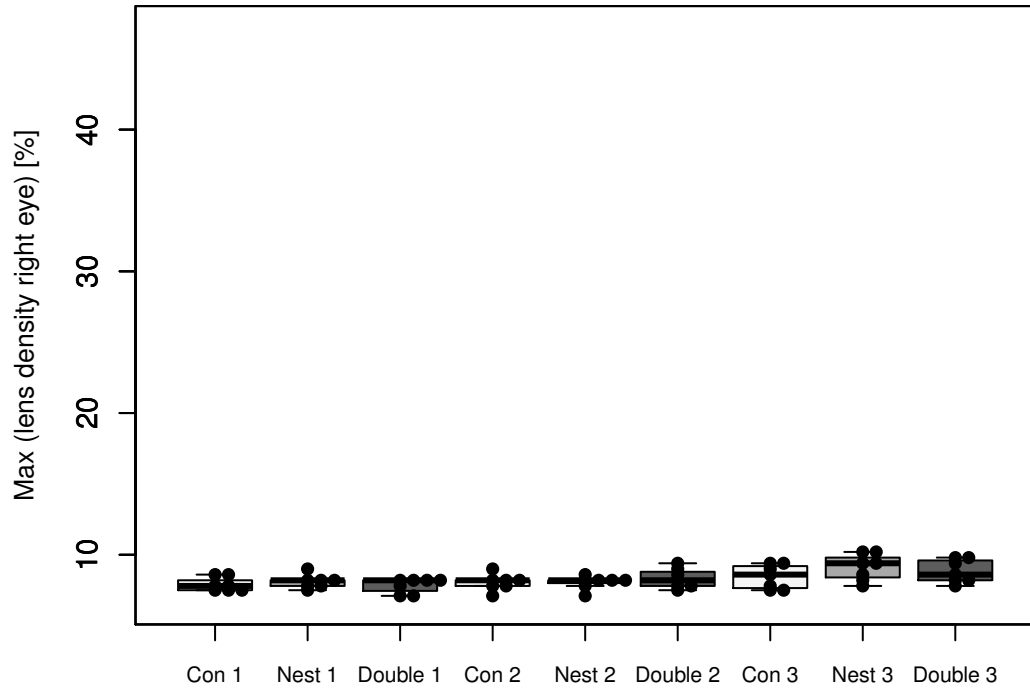**D2 female**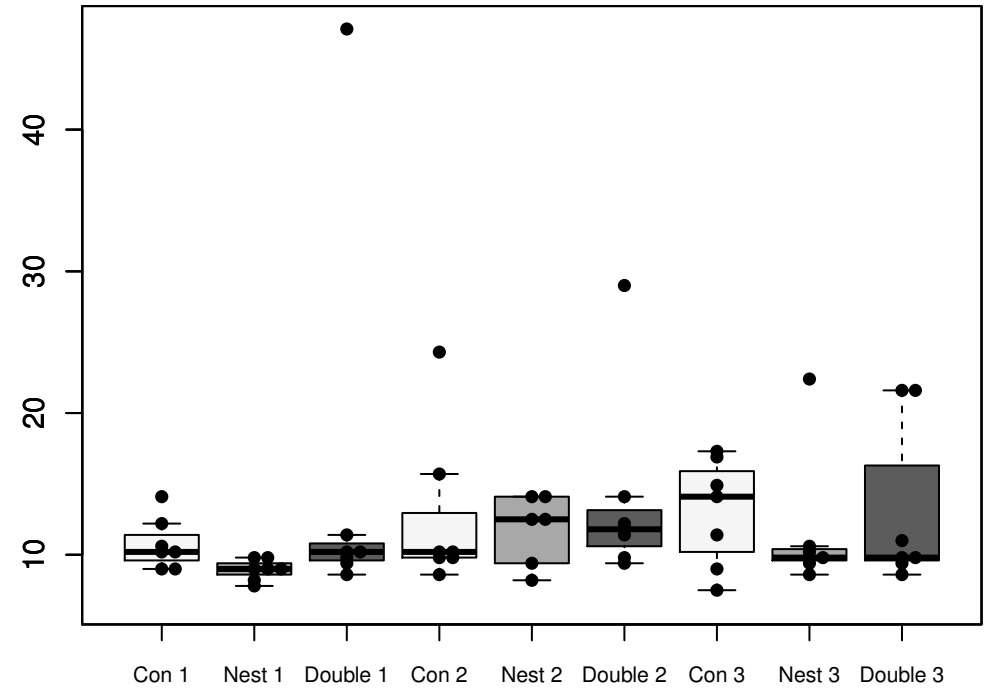**B6 male**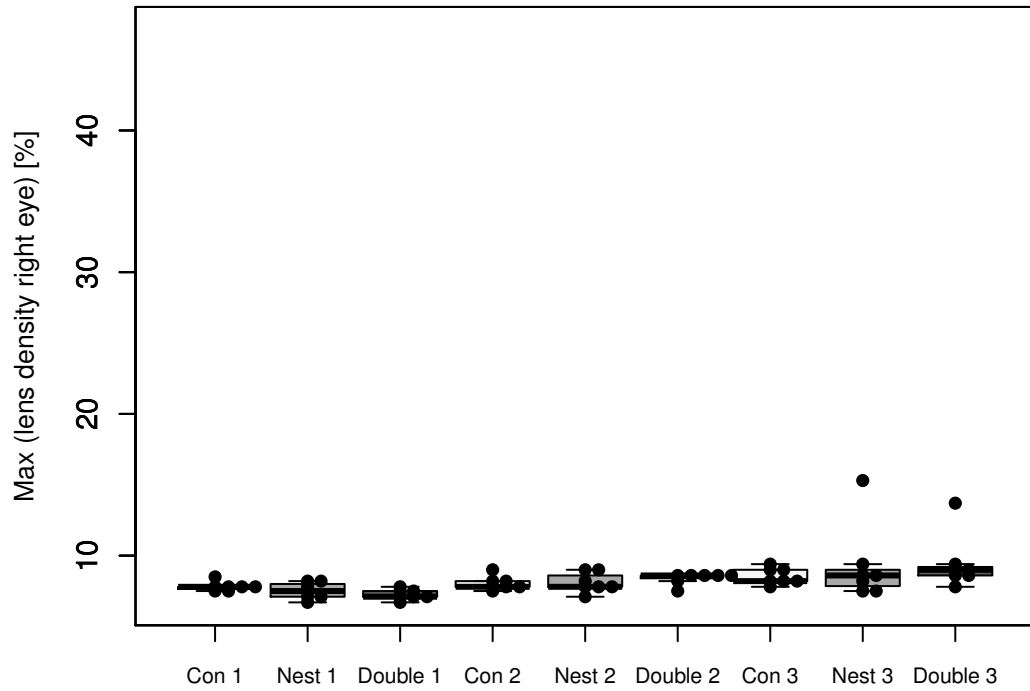**D2 male**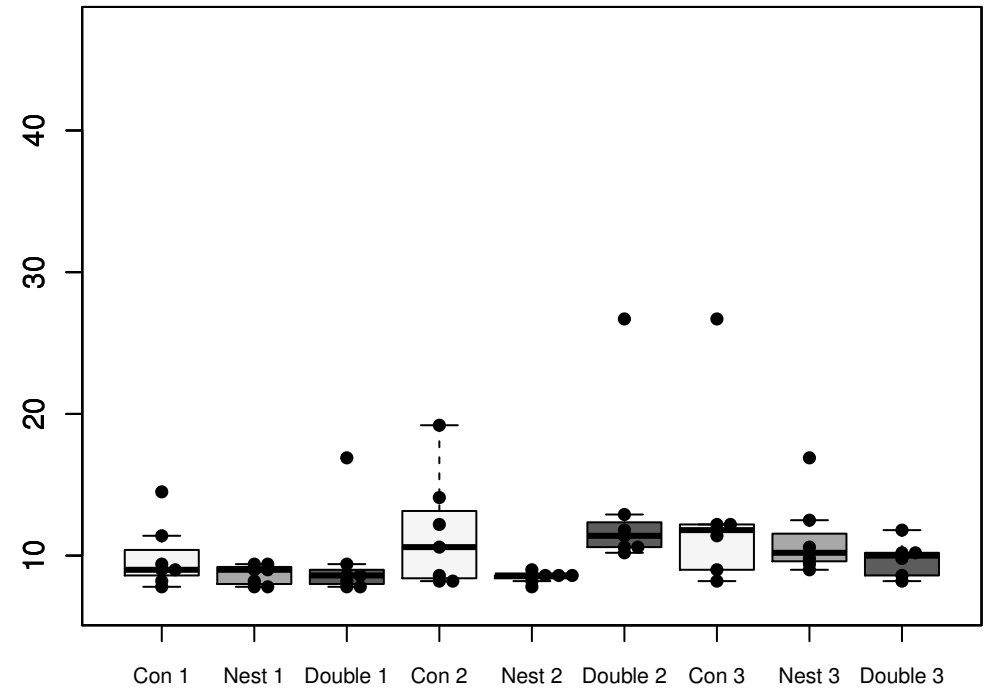

**B6 female**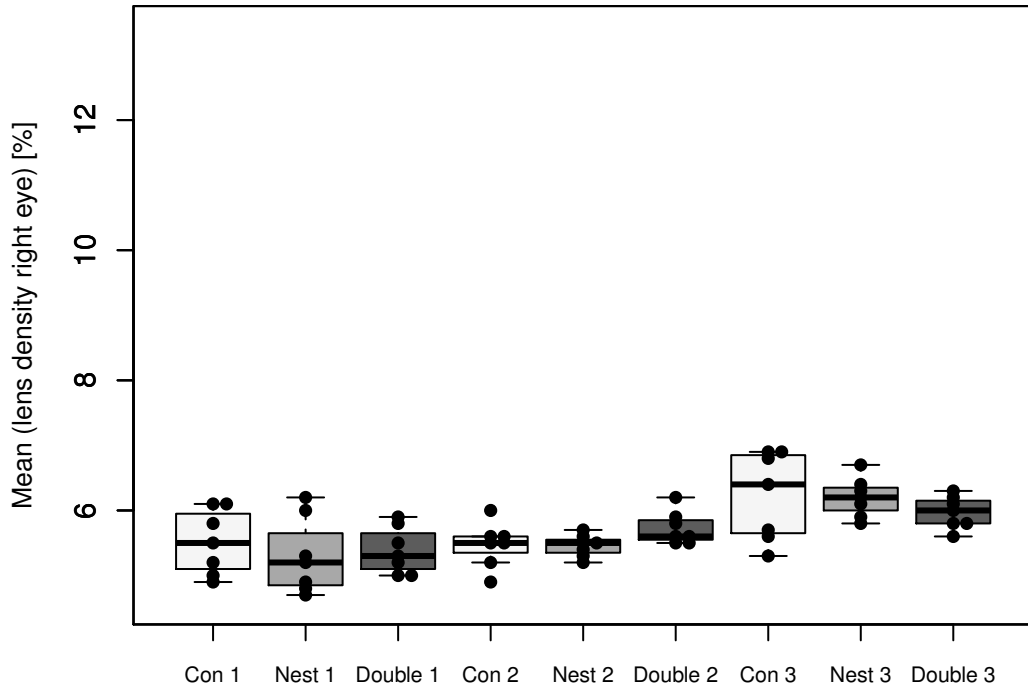**D2 female**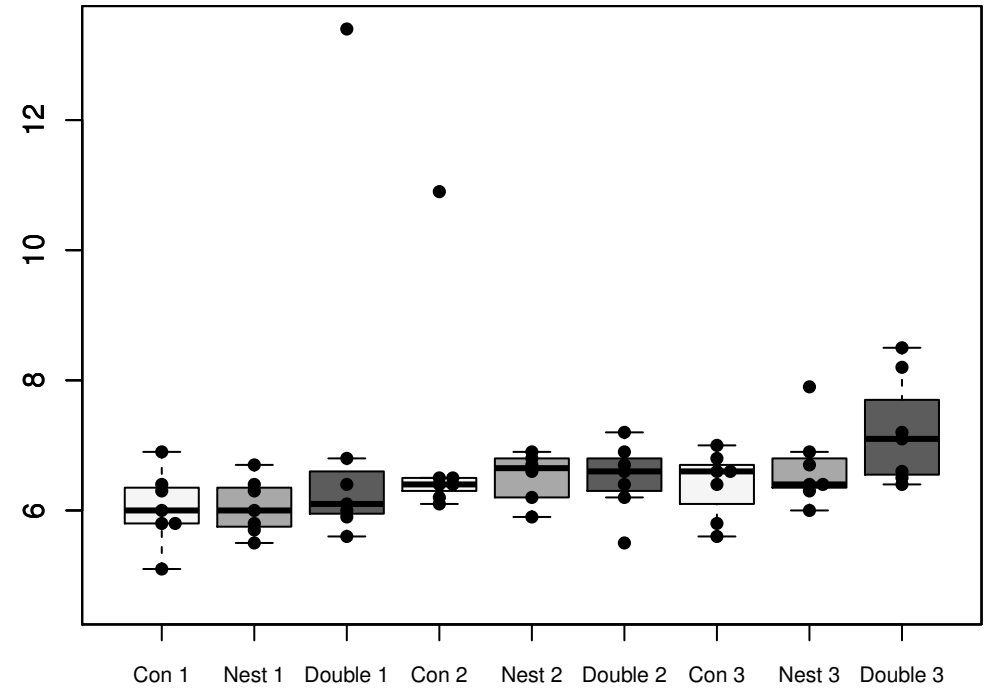**B6 male**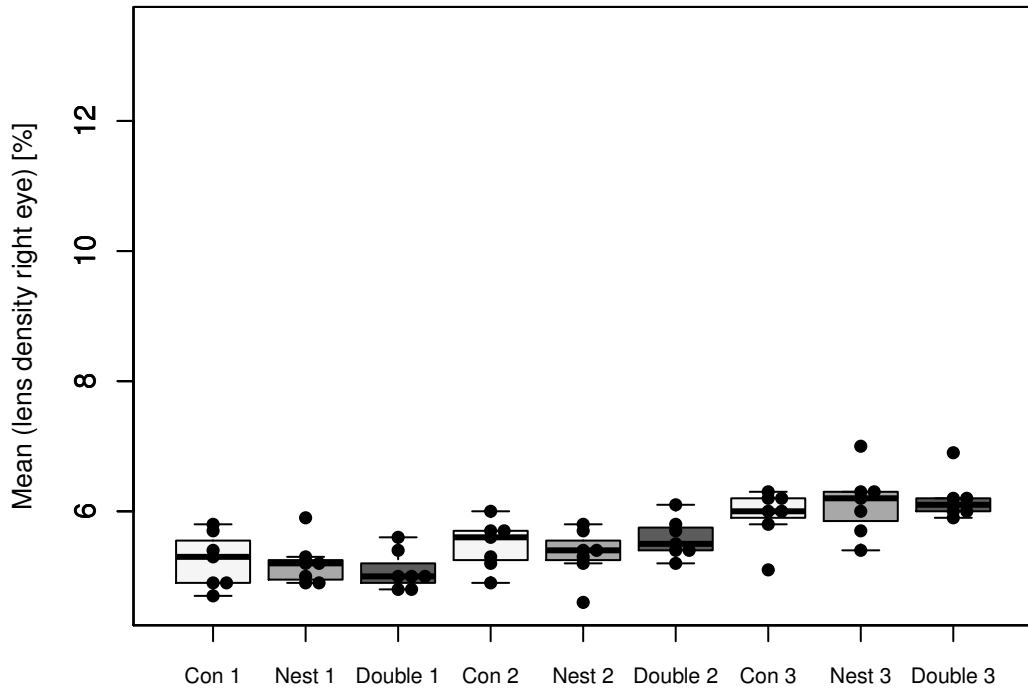**D2 male**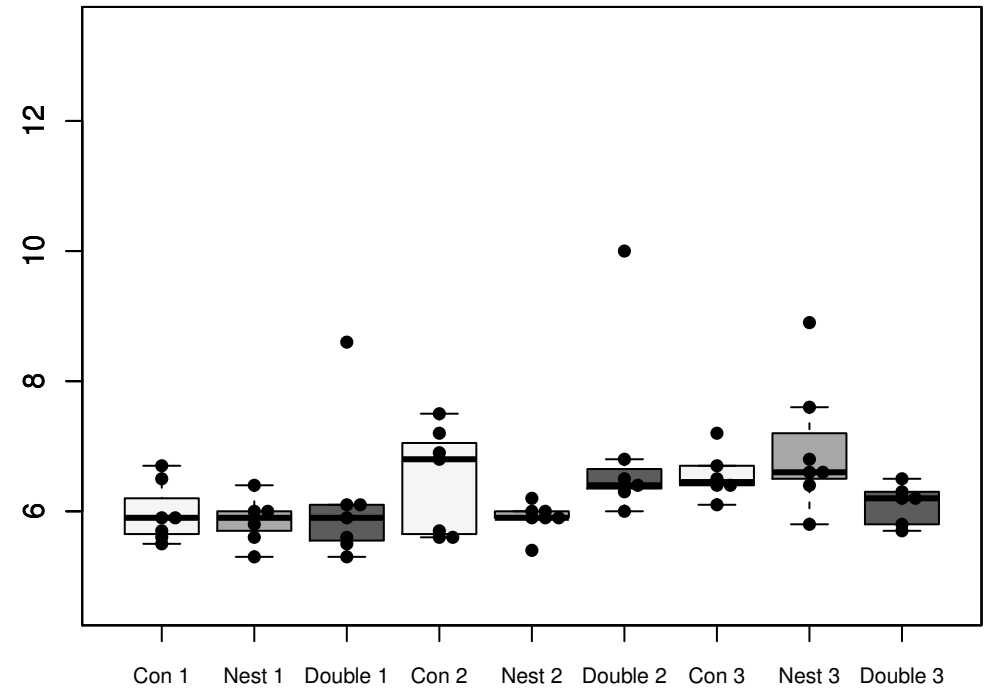

**B6 female**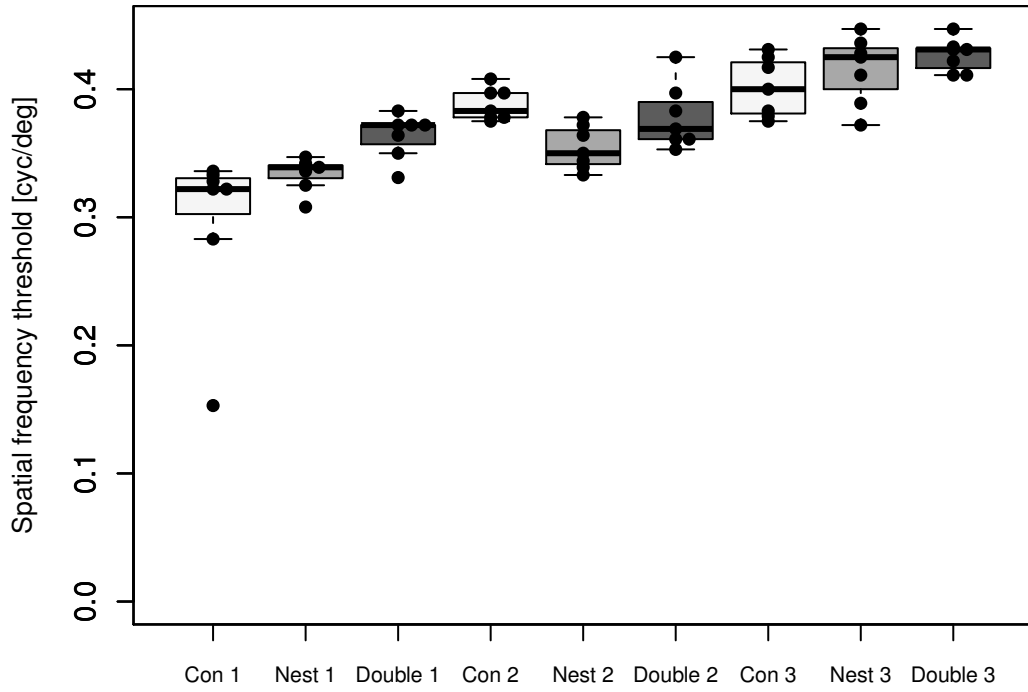**D2 female**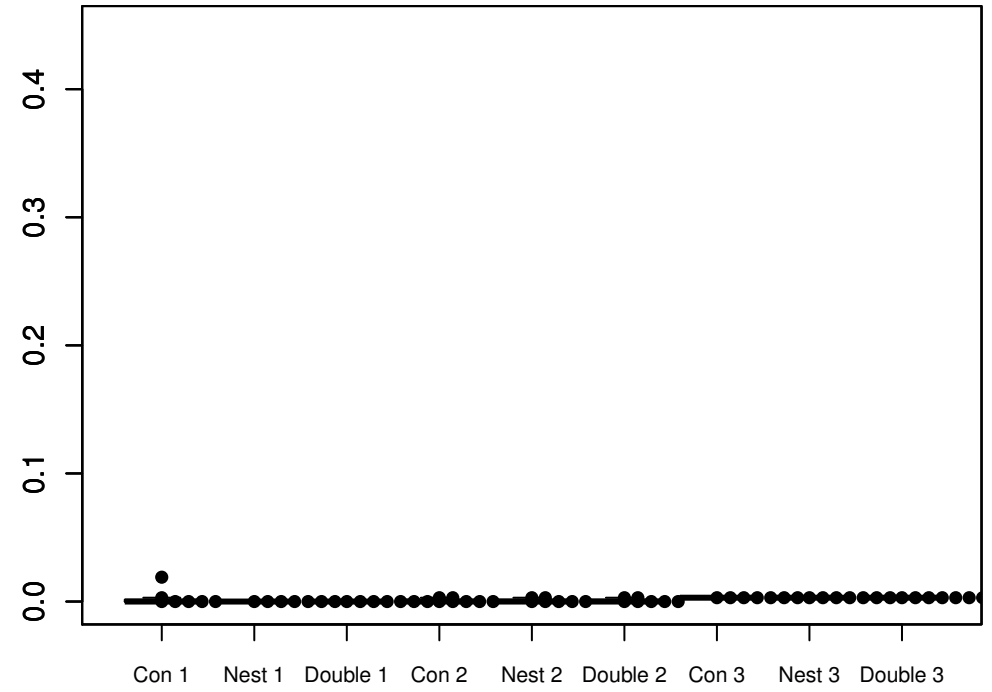**B6 male**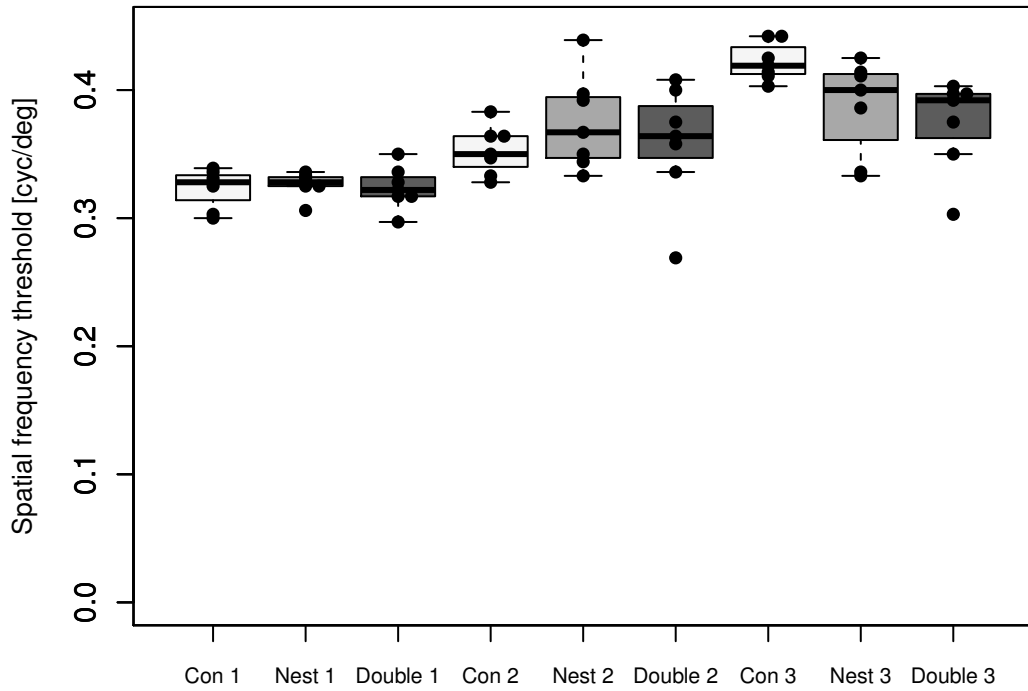**D2 male**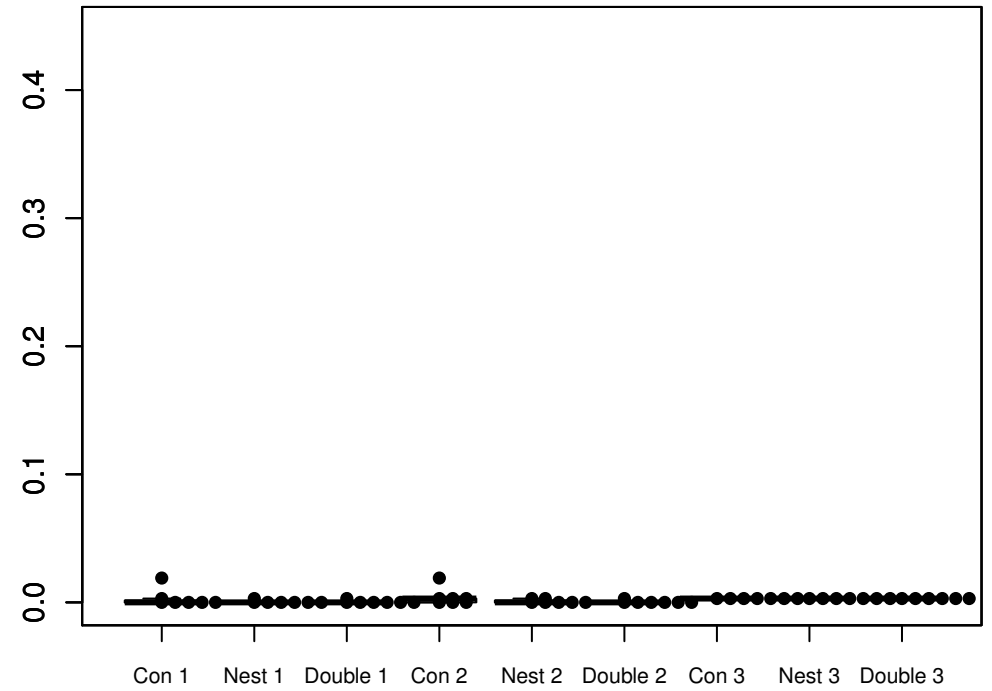

**B6 female**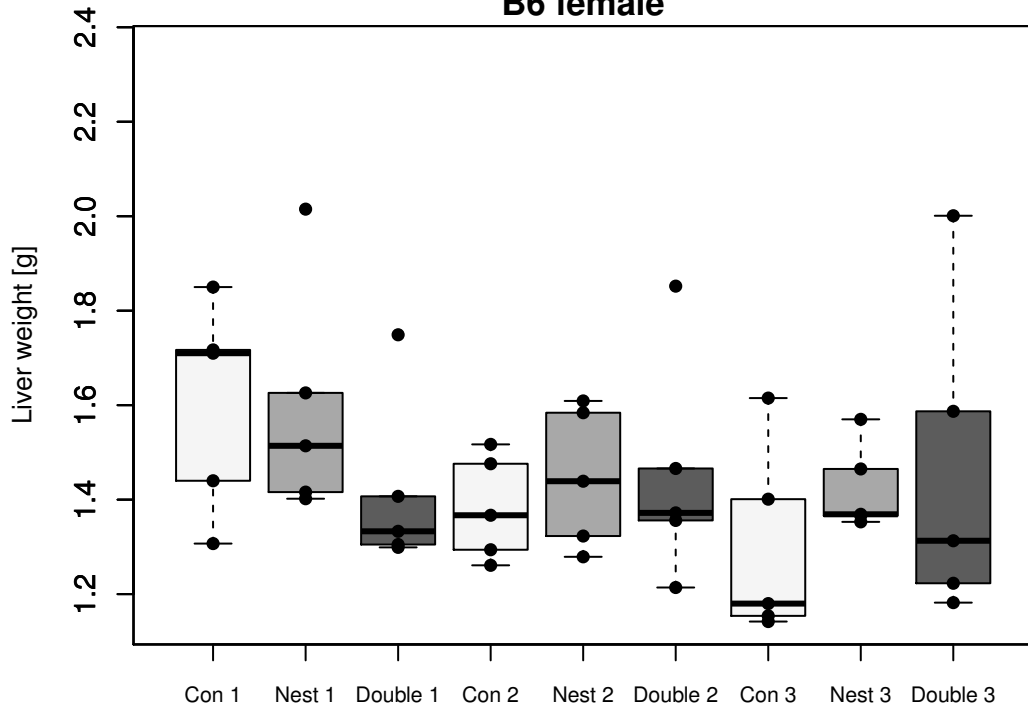**D2 female**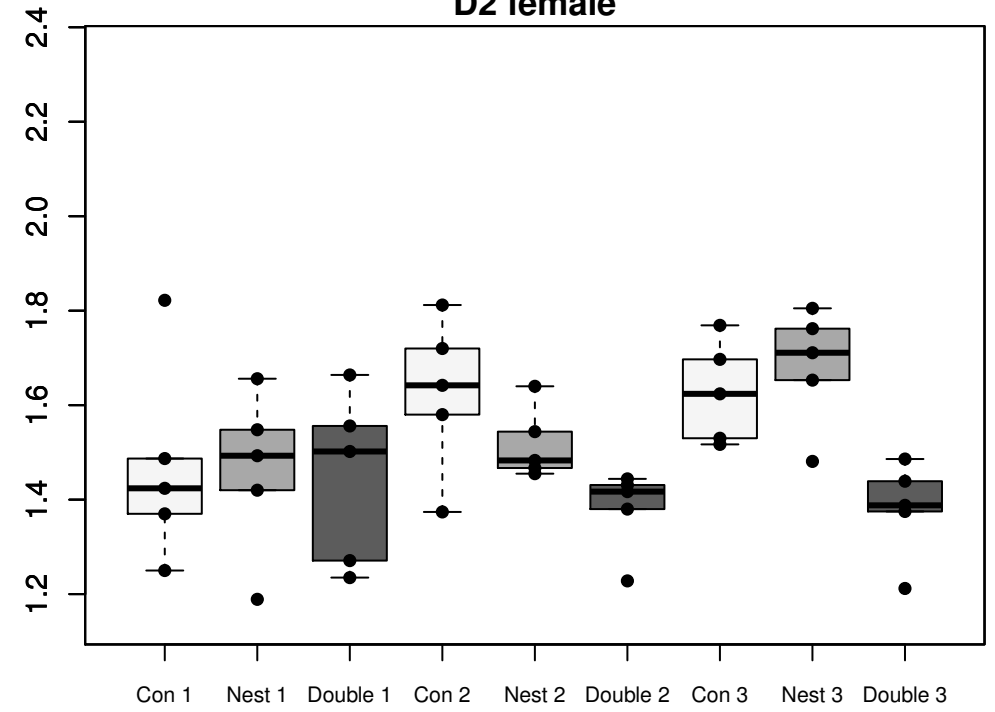**B6 male**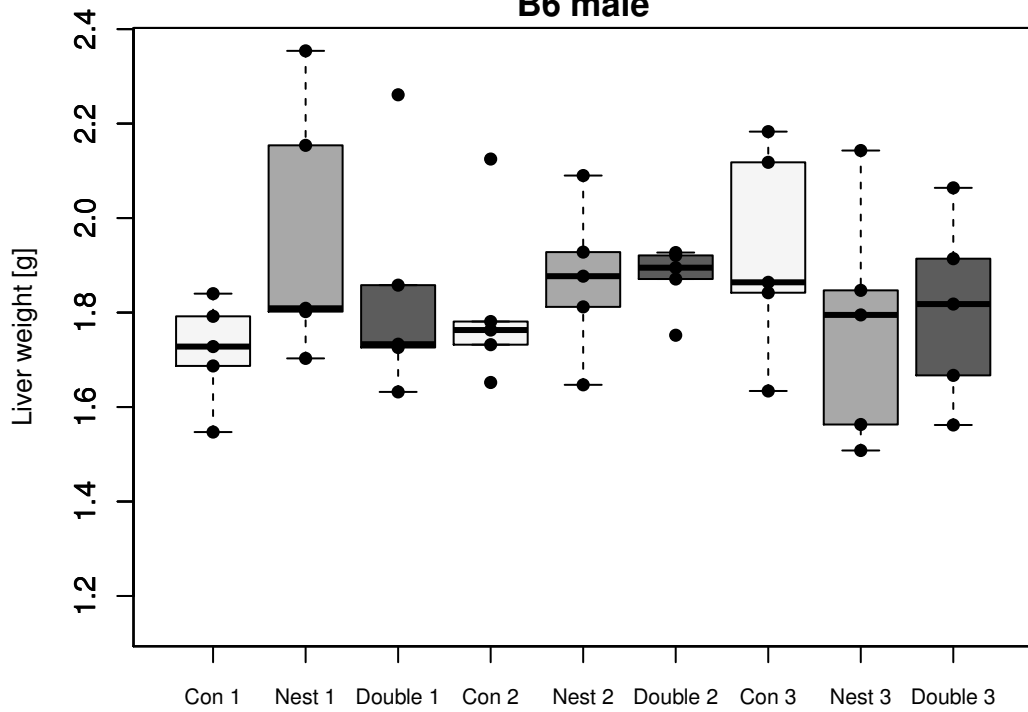**D2 male**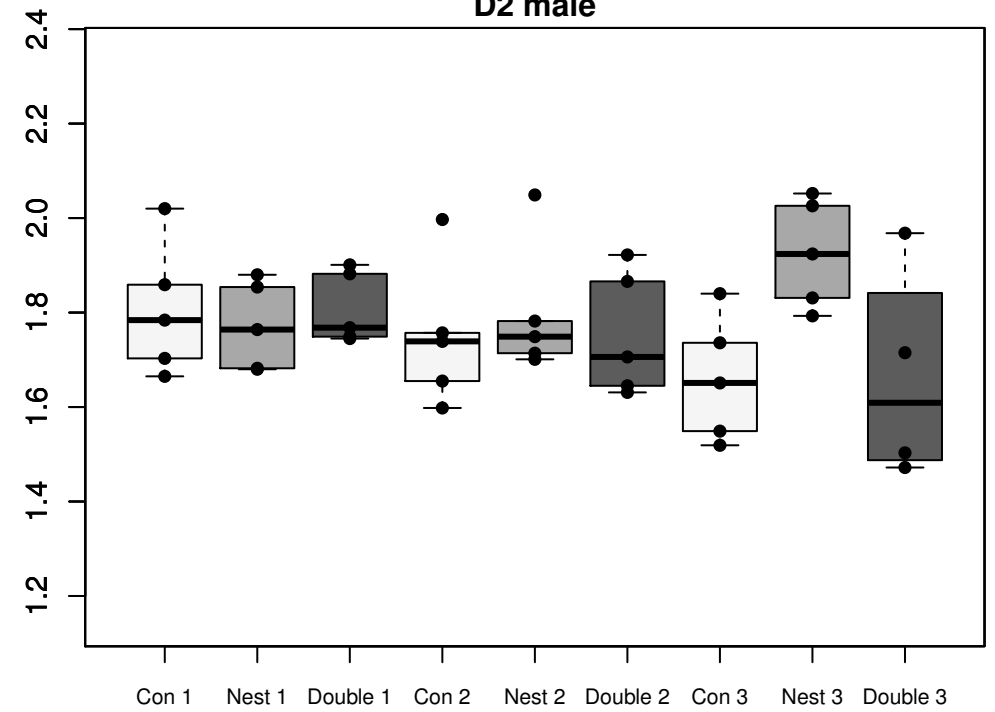



**B6 female**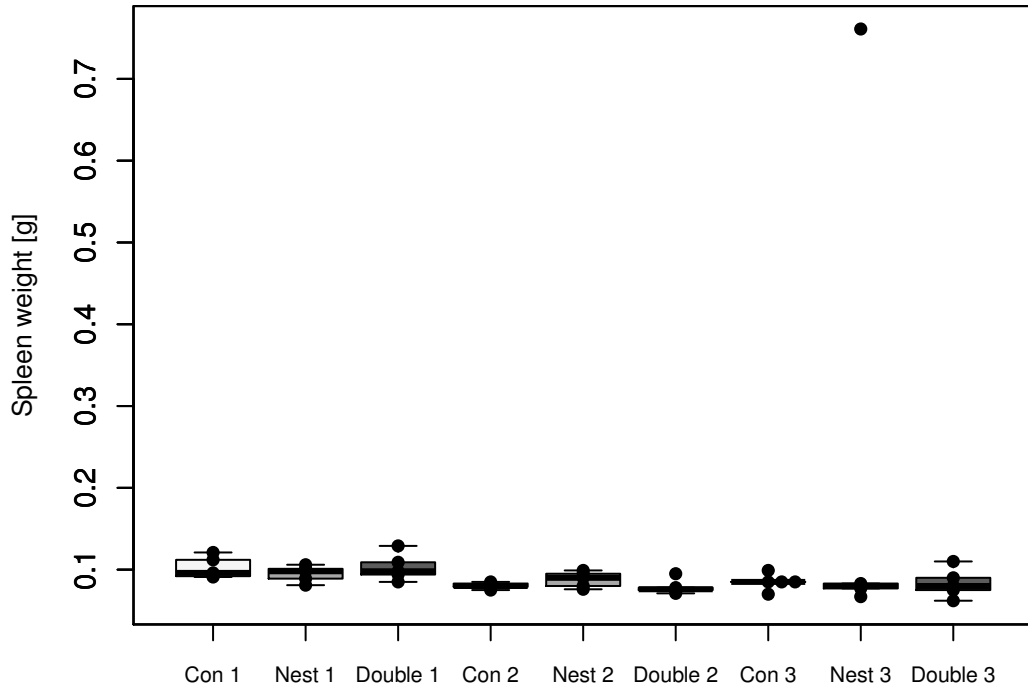**D2 female**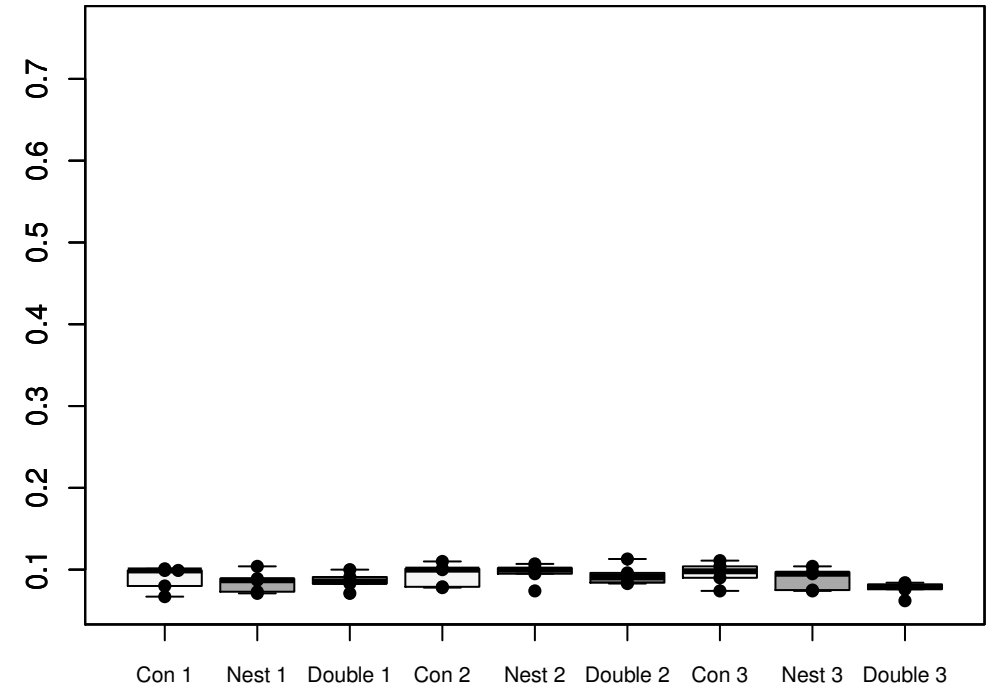**B6 male**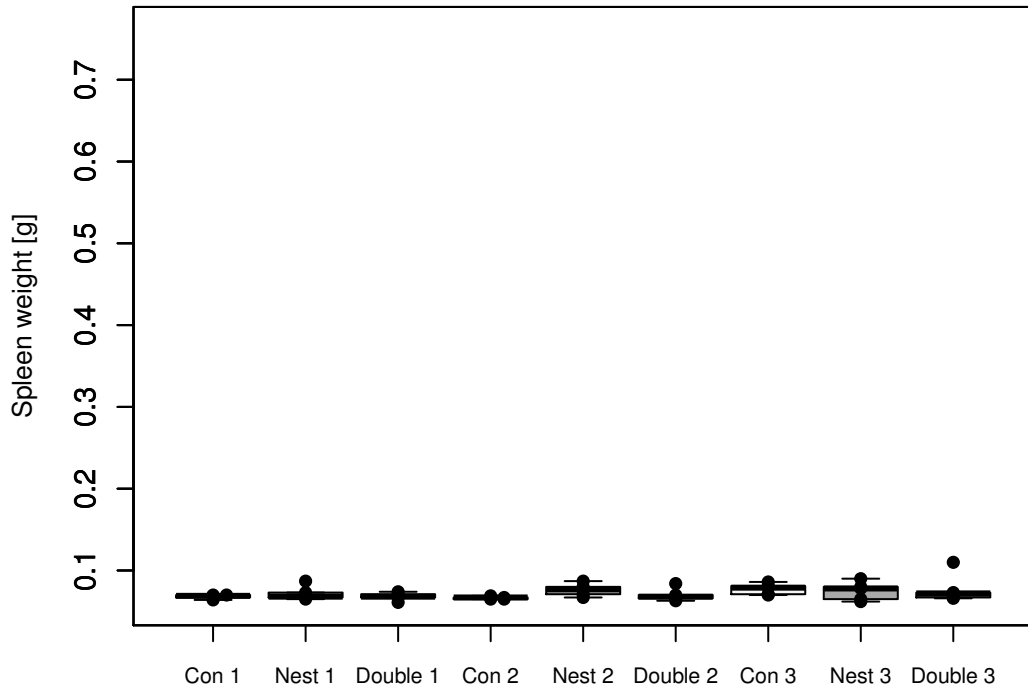**D2 male**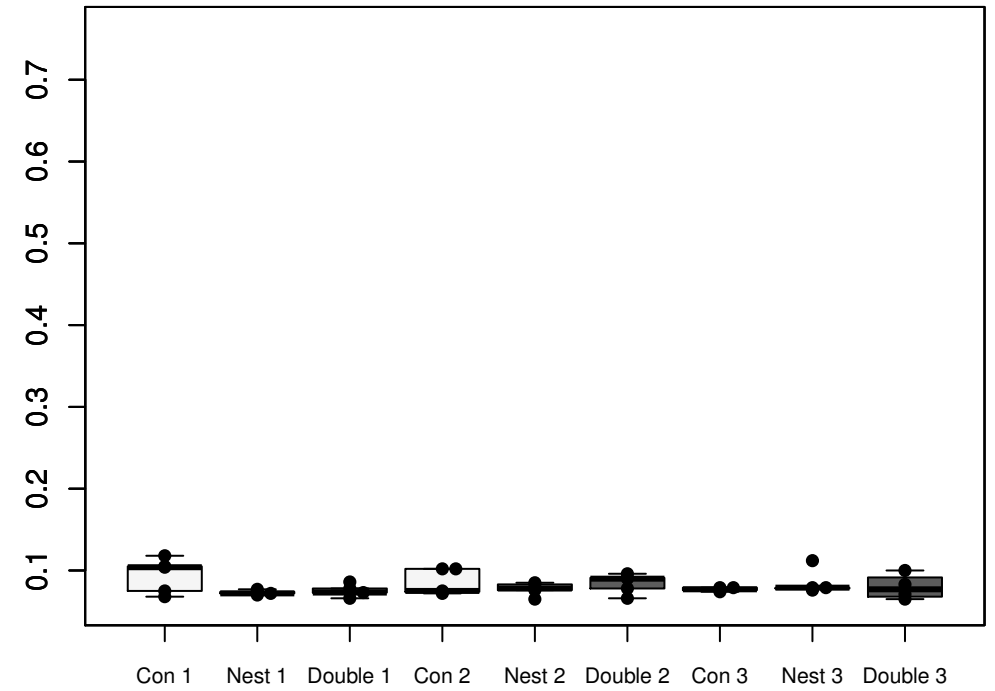

**B6 female**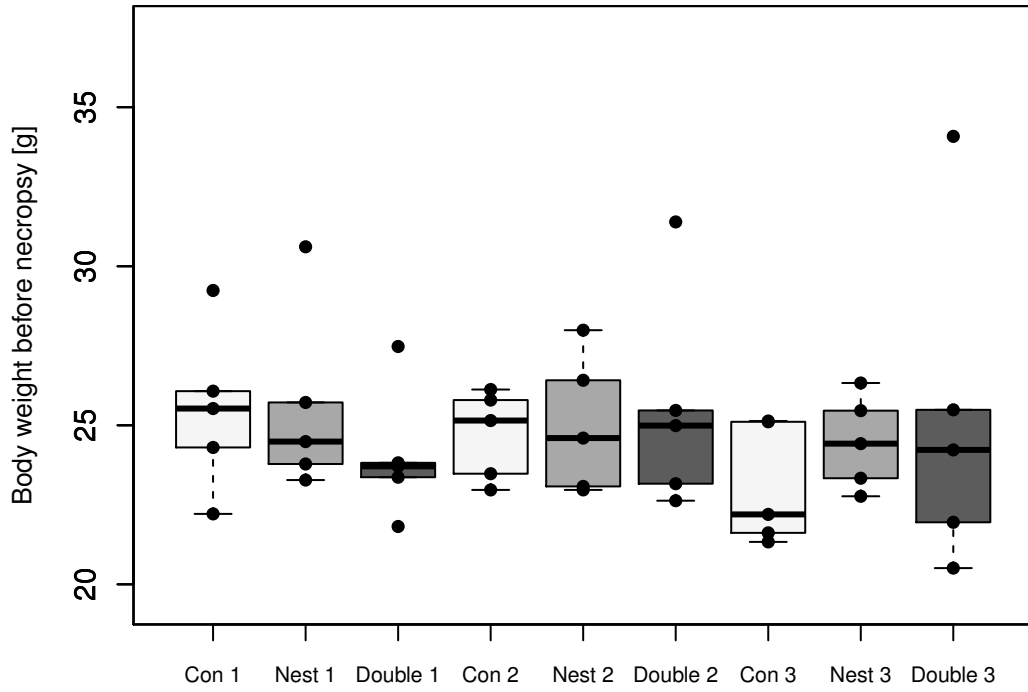**D2 female**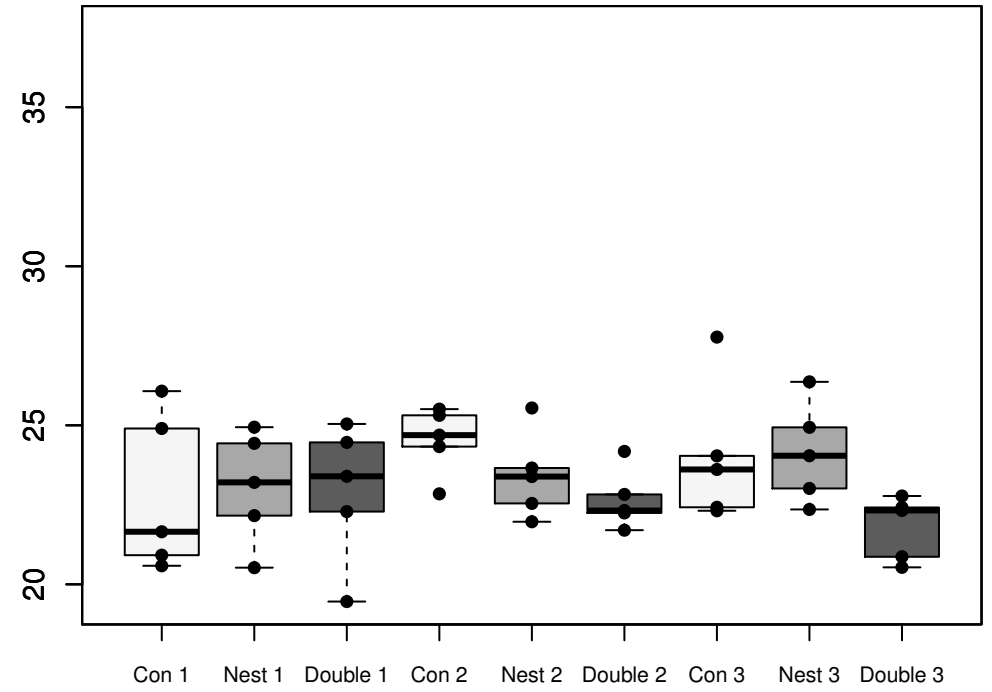**B6 male**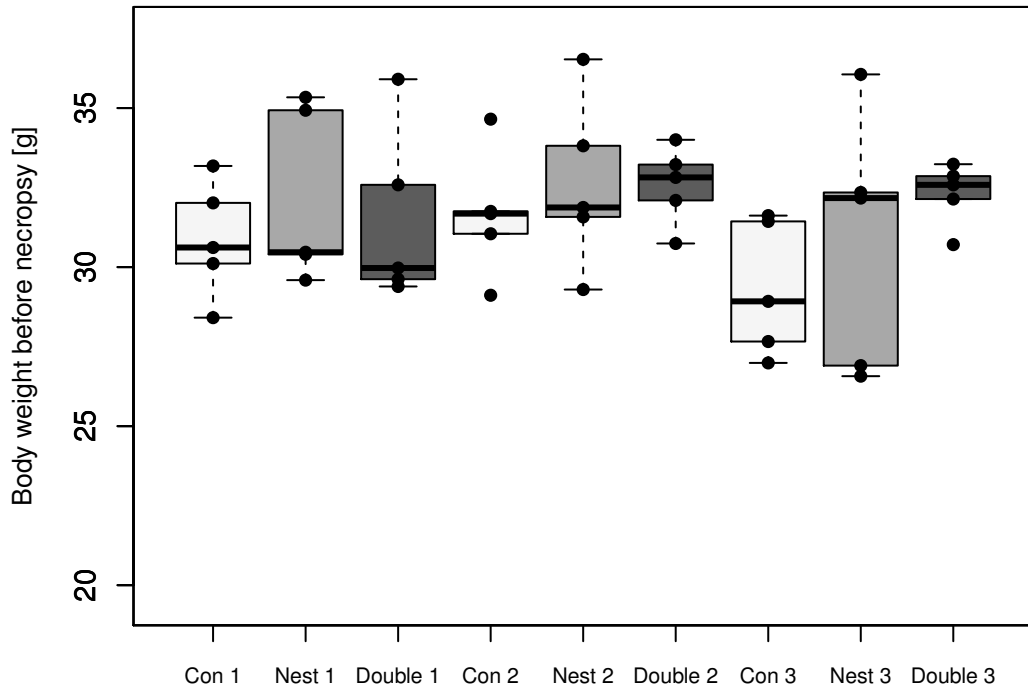**D2 male**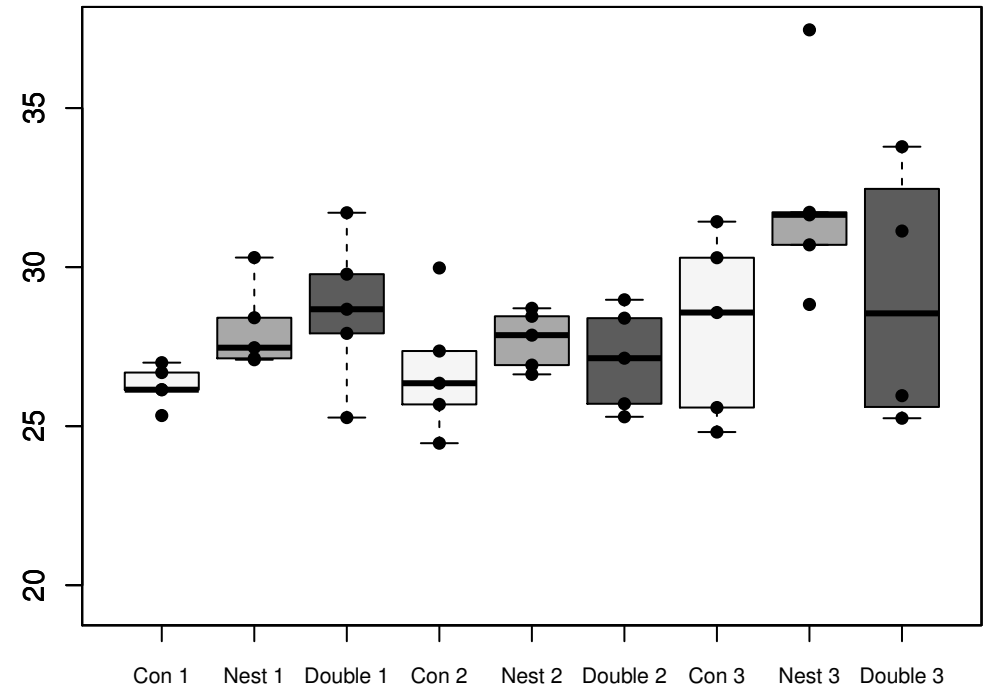

**B6 female**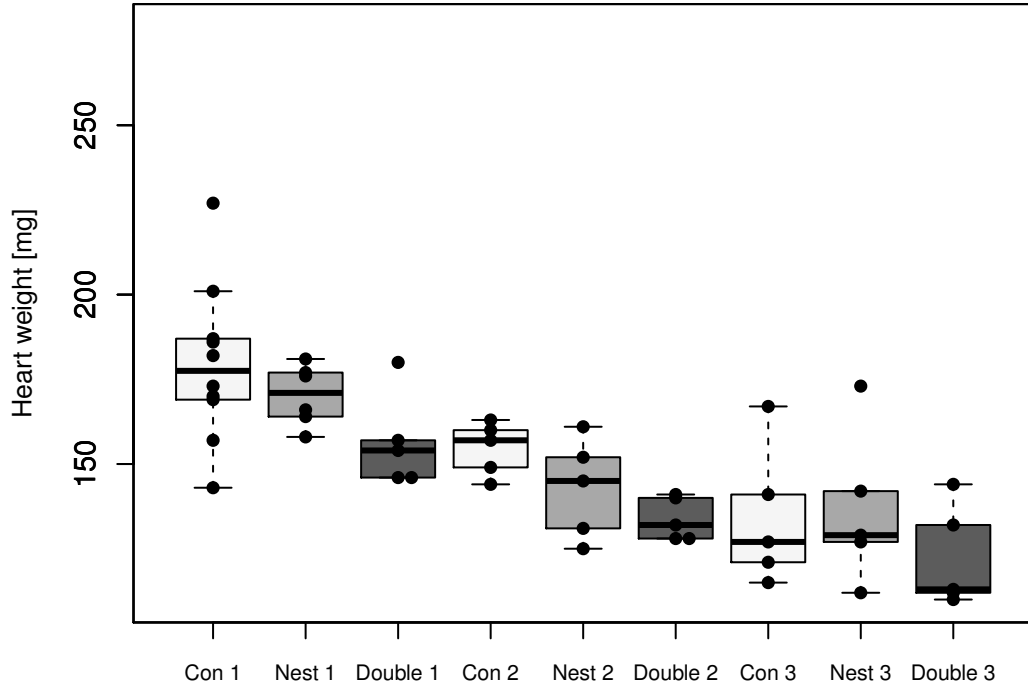**D2 female**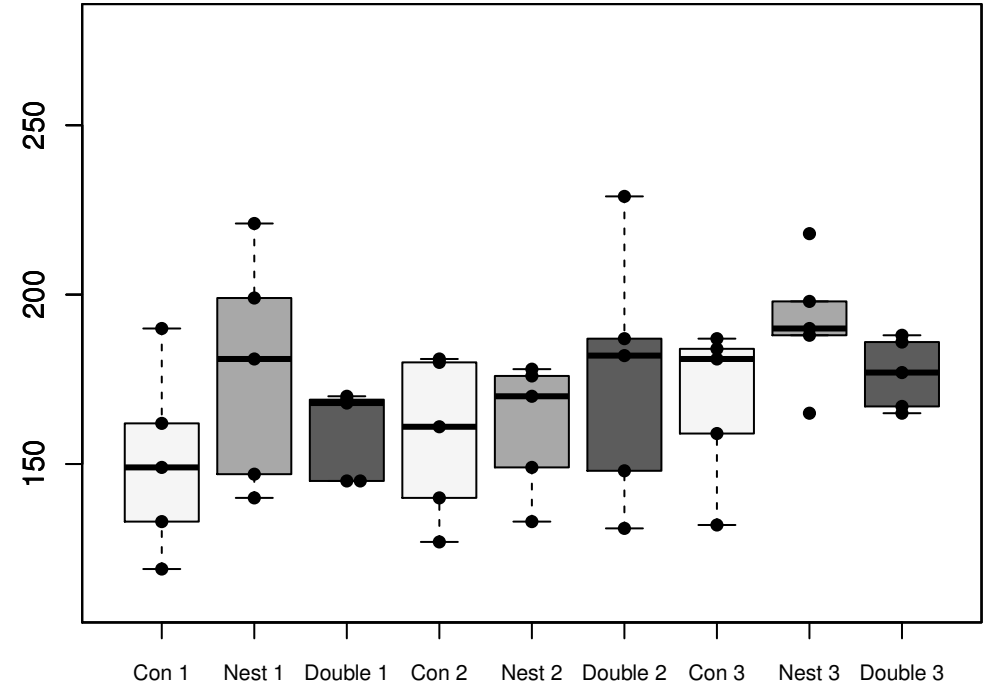**B6 male**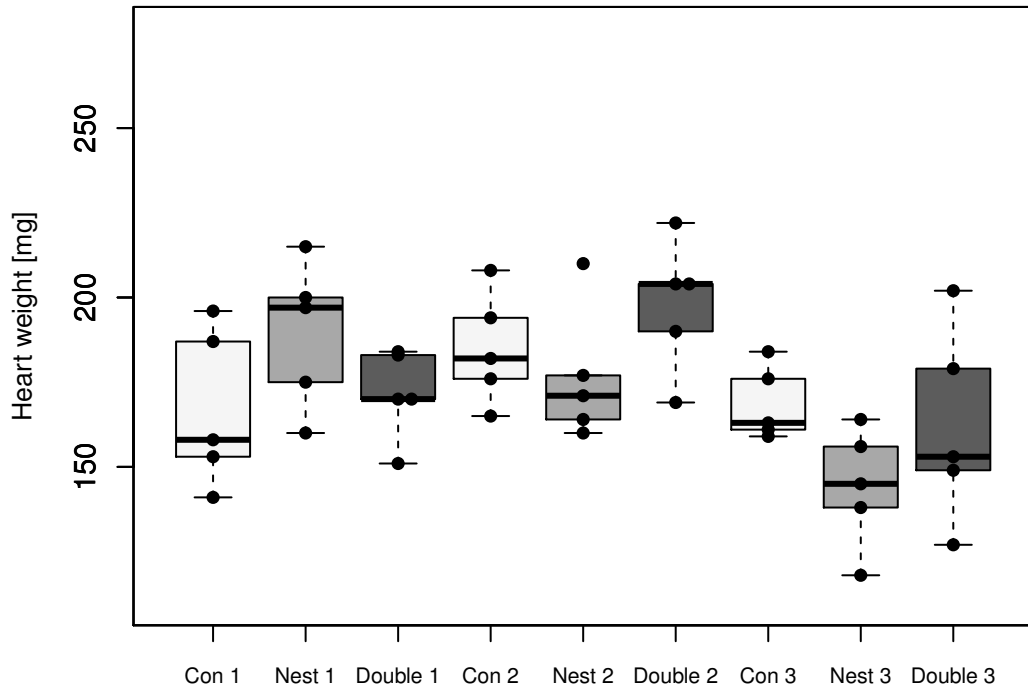**D2 male**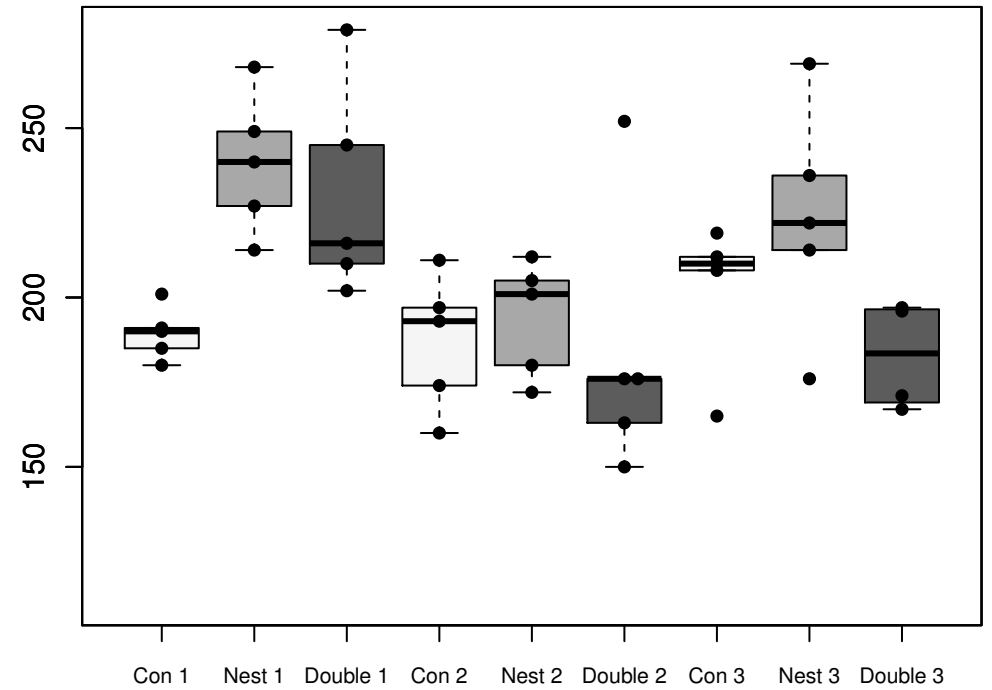

**B6 female**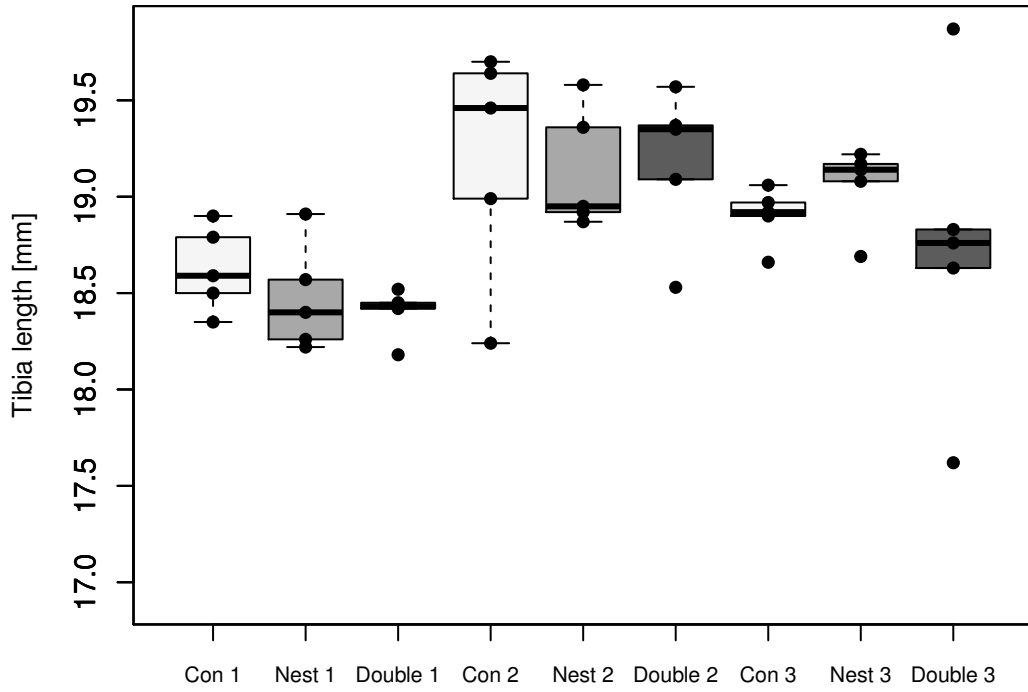**D2 female**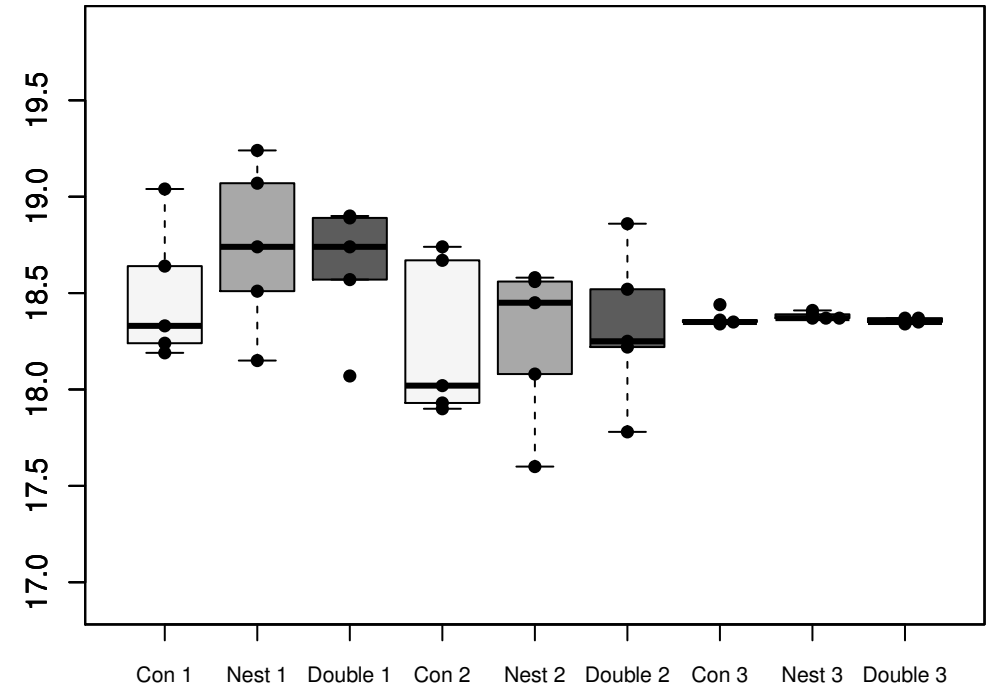**B6 male**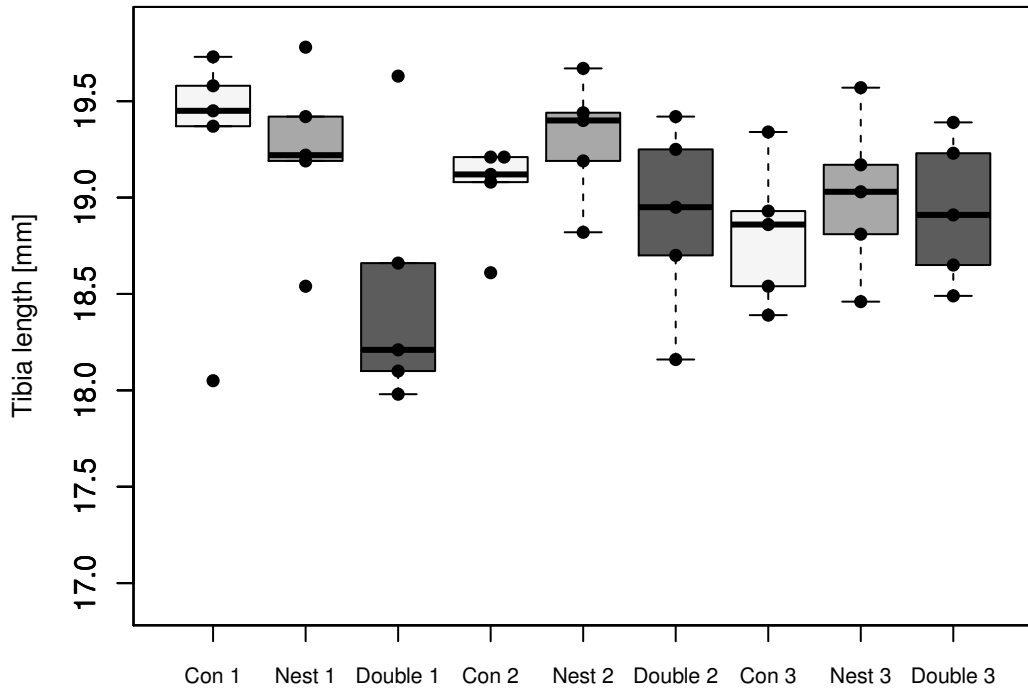**D2 male**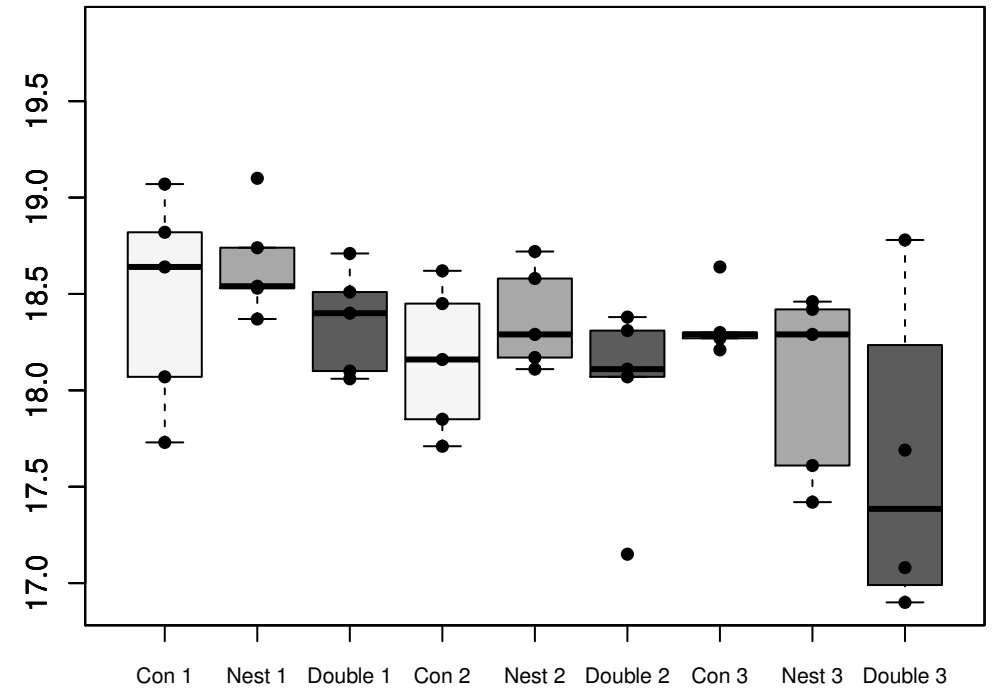

Supplement: pbio.2005019.s002.pdf [file pbio.2005019.s002.pdf]
