# Supplementary material for: Laboratory mouse housing conditions can be improved using common environmental enrichment without compromising data
Source: PubMed Central journal article supplement (PMC5922977; doi:10.1371/journal.pbio.2005019), 2018-04-16
Supplement: pbio.2005019.s004.pdf [file pbio.2005019.s004.pdf]

S1 Table. Results of SHIRPA (neurology screen).

| strain                  | B6      |         |         |         |        |         | D2      |        |        |        |        |        |
|-------------------------|---------|---------|---------|---------|--------|---------|---------|--------|--------|--------|--------|--------|
|                         | control |         | nest    |         | double |         | control |        | nest   |        | double |        |
| sex                     | m       | f       | m       | f       | m      | f       | m       | f      | m      | f      | m      | f      |
| body position           | 0/30/0  | 0/30/0  | 0/30/0  | 0/30/0  | 0/30/0 | 0/30/0  | 0/30/0  | 0/30/0 | 0/30/0 | 0/30/0 | 0/30/0 | 0/30/0 |
| tremor                  | 30/0    | 30/0    | 29/1    | 30/0    | 30/0   | 30/0    | 30/0    | 30/0   | 30/0   | 30/0   | 30/0   | 30/0   |
| defecation              | 20/10   | 16/14   | 14/16   | 19/11   | 20/10  | 17/13   | 11/19   | 18/12  | 14/16  | 21/9   | 17/13  | 26/4   |
| transfer arousal        | 0/23/7  | 0/13/17 | 0/19/11 | 0/16/14 | 0/22/8 | 0/17/13 | 0/27/3  | 0/29/1 | 0/28/2 | 0/29/1 | 0/29/1 | 0/29/1 |
| gait                    | 30/0    | 30/0    | 30/0    | 30/0    | 30/0   | 30/0    | 30/0    | 30/0   | 30/0   | 30/0   | 30/0   | 30/0   |
| tail elevation          | 0/21/9  | 0/23/7  | 0/20/10 | 0/23/7  | 0/21/9 | 0/29/1  | 0/30/0  | 0/30/0 | 0/30/0 | 0/30/0 | 0/30/0 | 0/30/0 |
| startle response        | 0/30/0  | 0/30/0  | 0/30/0  | 0/30/0  | 0/29/1 | 0/30/0  | 0/30/0  | 1/29/0 | 2/28/0 | 0/30/0 | 0/30/0 | 0/30/0 |
| touch escape            | 0/19/11 | 0/21/9  | 0/25/5  | 0/25/5  | 0/22/8 | 0/23/7  | 0/23/7  | 0/24/6 | 0/25/5 | 0/22/8 | 0/22/8 | 0/25/5 |
| trunk curl              | 30/0    | 30/0    | 30/0    | 30/0    | 30/0   | 30/0    | 30/0    | 30/0   | 30/0   | 30/0   | 30/0   | 30/0   |
| limb grasping           | 30/0    | 30/0    | 30/0    | 30/0    | 30/0   | 30/0    | 30/0    | 30/0   | 30/0   | 30/0   | 30/0   | 30/0   |
| pinna reflex            | 30/0    | 30/0    | 30/0    | 30/0    | 30/0   | 30/0    | 30/0    | 30/0   | 30/0   | 30/0   | 30/0   | 30/0   |
| urination               | 8/22    | 4/26    | 9/21    | 11/19   | 8/22   | 6/24    | 6/24    | 1/29   | 5/25   | 6/24   | 4/26   | 4/26   |
| contact righting reflex | 30/0    | 30/0    | 30/0    | 30/0    | 30/0   | 30/0    | 30/0    | 30/0   | 30/0   | 30/0   | 30/0   | 30/0   |
| evidence of biting      | 30/0    | 30/0    | 30/0    | 30/0    | 30/0   | 29/1    | 30/0    | 30/0   | 30/0   | 30/0   | 30/0   | 30/0   |
| vocalisation            | 25/5    | 25/5    | 26/4    | 23/7    | 23/7   | 28/2    | 27/3    | 28/2   | 26/4   | 27/3   | 28/2   | 28/2   |

Results are presented as number of animals receiving the parameter-specific score in combined cohorts and are described as following: (x/y/z) with x= number of animals with score “0”, y= number of animals with score “1”, z= number of animals with score “2”. Specifications for scores: body position: 0= inactive, 1= active, 2= excessively active; tremor: 0= absent, 1= present; defecation: 0= present, 1= absent; transfer arousal: 0= prolonged freeze, 1= brief freeze, 2= immediate movement; gait: 0= fluid, 1= abnormal; tail elevation: 0= dragging, 1= horizontal, 2= elevated; startle response: 0= no reaction, 1= Preyer reflex, 2= jumping; touch escape: 0= no response, 1= response to touch, 2= flees prior to touch; trunk curl: 0= absent, 1= present; limb grasping: 0= absent, 1= present; pinna reflex: 0= present, 1= absent; urination: 0= present, 1= absent; contact righting reflex: 0= present, 1= absent; evidence of biting: 0= no aggression, 1= aggressive; vocalization: 0= no, 1= yes.
