# Supplementary material for: Laboratory mouse housing conditions can be improved using common environmental enrichment without compromising data
Source: PubMed Central journal article supplement (PMC5922977; doi:10.1371/journal.pbio.2005019), 2018-04-16
Supplement: pbio.2005019.s005.pdf [file pbio.2005019.s005.pdf]

S2 Table. Summary of background lesions in histopathological examination (pathology screen).

| strain                                          | B6      |     |      |     |        |     | D2      |       |       |       |        |       |
|-------------------------------------------------|---------|-----|------|-----|--------|-----|---------|-------|-------|-------|--------|-------|
|                                                 | control |     | nest |     | double |     | control |       | nest  |       | double |       |
| experimental group                              | m       | f   | m    | f   | m      | f   | m       | f     | m     | f     | m      | f     |
| <b>Testes</b>                                   |         |     |      |     |        |     |         |       |       |       |        |       |
| <i>focal vacuolation of germinal epithelium</i> | 0/6     |     | 0/6  |     | 2/6    |     | 0/6     |       | 1/5   |       | 0/5    |       |
| <b>seminal vesicle</b>                          |         |     |      |     |        |     |         |       |       |       |        |       |
| <i>focal hyperplasia</i>                        | 0/6     |     | 0/6  |     | 0/6    |     | 1/6     |       | 0/5   |       | 1/5    |       |
| <b>ovary</b>                                    |         |     |      |     |        |     |         |       |       |       |        |       |
| <i>follicular cyst</i>                          |         | 1/6 |      | 0/6 |        | 0/6 |         | 0/6   |       | 0/5   |        | 0/5   |
| <b>heart</b>                                    |         |     |      |     |        |     |         |       |       |       |        |       |
| <i>calcification of epi- and myocardium</i>     | 0/6     | 0/6 | 0/6  | 0/6 | 0/6    | 0/6 | 11/12   | 10/12 | 11/12 | 11/12 | 12/12  | 11/12 |
| <b>lung</b>                                     |         |     |      |     |        |     |         |       |       |       |        |       |
| <i>focal inflammatory infiltrates</i>           | 0/6     | 1/6 | 0/6  | 0/6 | 0/6    | 0/6 | 0/6     | 0/6   | 0/5   | 0/5   | 0/5    | 1/5   |
| <i>focal vascular mineralization</i>            | 0/6     | 0/6 | 0/6  | 0/6 | 0/6    | 0/6 | 0/6     | 0/6   | 0/5   | 0/5   | 0/5    | 1/5   |
| <b>salivary gland (parotid)</b>                 |         |     |      |     |        |     |         |       |       |       |        |       |
| <i>basophilic hypertrophic foci</i>             | 0/6     | 1/6 | 0/6  | 0/6 | 0/6    | 0/6 | 0/6     | 0/6   | 0/5   | 0/5   | 0/5    | 1/5   |
| <b>salivary gland (submandibular)</b>           |         |     |      |     |        |     |         |       |       |       |        |       |
| <i>focal lymphohistiocytic infiltration</i>     | 0/6     | 0/6 | 0/6  | 1/6 | 0/6    | 0/6 | 0/6     | 0/6   | 0/5   | 0/5   | 0/5    | 1/5   |
| <b>Thyroid gland</b>                            |         |     |      |     |        |     |         |       |       |       |        |       |
| <i>vacuolation of glandular epithelium</i>      | 6/6     | 6/6 | 6/6  | 6/6 | 6/6    | 6/6 | 0/6     | 0/6   | 0/5   | 0/5   | 0/5    | 0/5   |
| <i>focal follicular cell hyperplasia</i>        | 0/6     | 0/6 | 0/6  | 0/6 | 0/6    | 0/6 | 1/6     | 1/6   | 0/5   | 0/5   | 0/5    | 1/5   |
| <b>parathyroid gland</b>                        |         |     |      |     |        |     |         |       |       |       |        |       |
| <i>small cyst</i>                               | 0/6     | 1/6 | 0/6  | 0/6 | 0/6    | 0/6 | 0/6     | 0/6   | 0/5   | 0/5   | 0/5    | 0/5   |
| <i>basophilic hypertrophic foci</i>             | 0/6     | 0/6 | 0/6  | 0/6 | 0/6    | 0/6 | 0/6     | 0/6   | 0/5   | 0/5   | 0/5    | 1/5   |
| <b>thymus</b>                                   |         |     |      |     |        |     |         |       |       |       |        |       |
| <i>focal cyst</i>                               | 0/6     | 0/6 | 0/6  | 0/6 | 0/6    | 0/6 | 0/6     | 0/6   | 0/5   | 0/5   | 1/5    | 0/5   |
| <b>liver</b>                                    |         |     |      |     |        |     |         |       |       |       |        |       |
| <i>focal microgranulomas</i>                    | 2/6     | 5/6 | 4/6  | 2/6 | 3/6    | 3/6 | 1/6     | 4/6   | 0/5   | 3/5   | 2/5    | 3/5   |
| <i>eosinophilic foci</i>                        | 0/6     | 0/6 | 0/6  | 0/6 | 0/6    | 0/6 | 0/6     | 0/6   | 1/5   | 0/5   | 1/5    | 1/5   |
| <b>adrenal gland</b>                            |         |     |      |     |        |     |         |       |       |       |        |       |
| <i>subcapsular cell hyperlasia (type A)</i>     | 0/6     | 5/6 | 1/6  | 4/6 | 0/0    | 4/6 | 2/6     | 4/6   | 2/5   | 4/5   | 4/5    | 3/5   |
| <i>accessory cortical nodule</i>                | 0/6     | 0/6 | 0/6  | 0/6 | 0/6    | 1/6 | 0/6     | 0/6   | 0/5   | 0/5   | 0/5    | 0/5   |
| <b>pancreas</b>                                 |         |     |      |     |        |     |         |       |       |       |        |       |
| <i>focal inflammatory infiltrates</i>           | 1/6     | 1/6 | 0/6  | 2/6 | 0/6    | 1/6 | 1/6     | 1/6   | 0/5   | 2/5   | 0/5    | 2/5   |
| <i>foci of cellular alteration</i>              | 0/6     | 0/6 | 0/6  | 0/6 | 0/6    | 0/6 | 1/6     | 3/6   | 0/5   | 1/5   | 0/5    | 0/5   |
| <b>stomach</b>                                  |         |     |      |     |        |     |         |       |       |       |        |       |
| <i>keratinic cyst</i>                           | 0/6     | 1/6 | 0/6  | 1/6 | 0/6    | 0/6 | 0/6     | 0/6   | 0/5   | 0/5   | 0/5    | 0/5   |
| <b>small intestine</b>                          |         |     |      |     |        |     |         |       |       |       |        |       |
| <i>amyloidosis of lamina propria</i>            | 0/6     | 0/6 | 0/6  | 0/6 | 0/6    | 0/6 | 0/6     | 0/6   | 0/5   | 2/5   | 0/5    | 2/5   |
| <b>kidney</b>                                   |         |     |      |     |        |     |         |       |       |       |        |       |
| <i>focal tubular regeneration</i>               | 0/6     | 0/6 | 0/6  | 0/6 | 0/6    | 1/6 | 0/6     | 0/6   | 0/5   | 0/5   | 0/5    | 0/5   |
| <i>transitional cell papilloma</i>              | 0/6     | 0/6 | 0/6  | 0/6 | 0/6    | 1/6 | 0/6     | 0/6   | 0/5   | 0/5   | 0/5    | 0/5   |
| <b>urinary bladder</b>                          |         |     |      |     |        |     |         |       |       |       |        |       |
| <i>focal inflammatory infiltration</i>          | 0/6     | 0/6 | 0/6  | 0/6 | 0/6    | 0/6 | 0/6     | 1/6   | 0/5   | 0/5   | 0/5    | 0/5   |

Affected animals are shown as portion of total examined animals of combined cohorts.
